# Supplementary material for: An automated feeding system for the African killifish reveals the impact of diet on lifespan and allows scalable assessment of associative learning
Source: eLife. 2022 Nov 10;11:e69008. doi: 10.7554/eLife.69008 (PMC9788828; doi:10.7554/eLife.69008)
Supplement: Figure 1—source data 1. [file elife-69008-fig1-data1.xlsx]

## Sheet: Costs
All prices in USD	Cost	Units per 48 tanks	Subtotal	Cost per 3 months	Cost per 2 years	Cost per experiment, spread over 2 years
One time costs
Hardware per automated feeder	12.88	48	618.24	618.24	618.24	77.28
Raspberry Pi 3 with memory card	79.99	1	79.99	79.99	79.99	9.99875
Wireless router	19.98	1	19.98	19.98	19.98	2.4975
Ongoing costs
AWS server time	30	1	30	90	720	90
Total				808.21	1438.21	179.776

## Sheet: FeederBOM
Description	CatNumber	ManufacturerCatNum	EstCost	NumPerDevice	Estimated ExtendedCost	Notes	Vendor
RES SMD 100K OHM 1% 1/8W 0805	311-100KCRCT-ND	RC0805FR-07100KL	0.0186	1	0.0186		DigiKey
RES 10K OHM 5% 1/8W 0805	RMCF0805JT10K0CT-ND	RMCF0805JT10K0	0.0067	1	0.0067		DigiKey
RES SMD 1K OHM 5% 1/8W 0805	311-1.0KARCT-ND	RC0805JR-071KL	0.0145	1	0.0145		DigiKey
CAP CER 10UF 10V X5R 0805	1276-6456-1-ND	CL21A106KPFNNNG	0.0425	1	0.0425		DigiKey
CAP CER 0.1UF 50V Y5V 0805	311-1361-1-ND	CC0805ZRY5V9BB104	0.044	1	0.044		DigiKey
IC PWR RELAY 7NPN 1:1 16SOIC	296-1368-1-ND	ULN2003ADR	0.4104	1	0.4104		DigiKey
CAP ALUM 470UF 20% 16V RADIAL	1189-1859-ND	16ZLH470MEFC8X11.5	0.1733	1	0.1733		DigiKey
TIMESETL 5pcs DC 5V Stepper Motor 28BYJ-48 + 5pcs ULN2003 Driver Board + 40pcs Male Female Jumper Wire Cable for Arduino Raspberry PI	B077YGWRHK	28BYJ-48	2.198	1	2.198		Amazon	https://www.amazon.com/TIMESETL-Stepper-28BYJ-48-ULN2003-Raspberry/dp/B077YGWRHK/ref=sr_1_1?keywords=TIMESETL+5pcs+DC+5V+Stepper+Motor+28BYJ-48+%2B+5pcs+ULN2003+Driver+Board+%2B+40pcs+Male+Female+Jumper+Wire+Cable+for+Arduino+Raspberry+PI&qid=1553020083&s=electronics&sr=1-1-catcorr
Connector Header Through Hole 5 position 0.098" (2.50mm)	455-2270-ND	B5B-XH-A(LF)(SN)	0.1644	1	0.1644	correct pitch, slightly tight spacing (ideal is 2.54mm)	DigiKey
100pcs 15cm JST XH2.54-2P 2.54mm Pitch 2 Pin Connectors Kit Cable Plug Header Expansion Wire	B01G0HBZT6		0.2499	1	0.2499		Amazon	https://www.amazon.com/gp/product/B01G0HBZT6/ref=oh_aui_search_asin_title?ie=UTF8&psc=1
Sackorange 10 pcs 1 x 3.7V Battery Holder,18650 Battery Storage Case Plastic Box Holder Leads With 1 Slots for 6" Wire Leads (10 pcs 1x18650)	B071JBRYF3	4330196205	0.679	1	0.779		Amazon	https://www.amazon.com/gp/product/B071JBRYF3/ref=oh_aui_detailpage_o03_s00?ie=UTF8&psc=1
3D Solutech Natural Clear 1.75mm 3D Printer PLA Filament, Dimensional Accuracy +/- 0.03 mm, 2.2 LBS (1.0KG)	B00MB3CV6K	ST175CLPLA	0.01799	15	0.26985	cost per g, should be 15 g per device	Amazon
Acrylic at 0.066" thickness	B01DYG13CU	S1-1212.060-6	0.03471	13.5	0.468585	1/16 12" x 12" sheet is 8.99, estimated 13.5 square inches necessary per device	Amazon	https://www.amazon.com/dp/B01DYG13CU/_encoding=UTF8?colid=JT7WQ53K2IT5&coliid=I35FUZDELPYD0E
#6-32 Machine Screw, Nylon, 5/8" L, 50 PK	4DEX2	010632P062	0.0594	3	0.1782		Grainger	https://www.grainger.com/product/GRAINGER-APPROVED-6-32-Machine-Screw-4DEX2
#6-32 Machine Screw Nut, Plain Finish, Not Graded Nylon, Right Hand, PK25	4AGJ1	0400632HN	0.142	3	0.426		Grainger	https://www.grainger.com/product/GRAINGER-APPROVED-6-32-Machine-Screw-Nut-4AGJ1
Uxcell a13081500ux0353 20 Piece 50-100K Ohm Photoresistor Photo Resistors Light-Dependent Resistance	B00H4ZSGXC	a13081500ux0353	0.259	1	0.259	Uxcell a13081500ux0353 20 Piece 50-100K Ohm Photoresistor Photo Resistors Light-Dependent Resistance	Amazon	https://www.amazon.com/gp/product/B00H4ZSGXC/ref=oh_aui_search_asin_title?ie=UTF8&psc=1
LOLIN D1 mini V3.1.0 - WEMOS WIFI Internet of Things development board based ESP8266 4MB MicroPython Nodemcu Arduino Compatible			3.8485	1	3.8485	These shift around, need to find	Aliexpress
Chanzon 100 pcs 5mm Green LED Diode Lights (Clear Round Transparent DC 3V 20mA) Super Bright Lighting Bulb Lamps Electronics Components Light Emitting Diodes	B01AUI4VVA	100F5T-YT-WH-GR	0.0663	1	0.0663		Amazon	https://www.amazon.com/gp/product/B01AUI4VVA/ref=oh_aui_search_asin_title?ie=UTF8&psc=1
Custom PBC			0.264	1	0.264	cost is 13.20 per 50 boards	JLCPCB
EBL 18650 Battery 3.7V 3000mAh Performance Li-ion Rechargeable Batteries with Stable Storage Boxes, 6 Packs		B074M27D58	2.99833	1	2.99833	could not find on amazon anymore, can swap for similar 18650 battery	Amazon
				Total:	12.8801
