# Supplementary material for: An automated feeding system for the African killifish reveals the impact of diet on lifespan and allows scalable assessment of associative learning
Source: eLife. 2022 Nov 10;11:e69008. doi: 10.7554/eLife.69008 (PMC9788828; doi:10.7554/eLife.69008)
Supplement: Figure 2—source data 4. [file elife-69008-fig2-data4.csv]

date	feeder	fish	number_feedings	delta	lifespan	planned_feeding	deviation	Excluded
8/31/19	4e835b00	L1-1	3	567	L1	3	0	0
9/1/19	4e835b00	L1-1	3	552	L1	3	0	0
9/2/19	4e835b00	L1-1	3	532	L1	3	0	0
9/3/19	4e835b00	L1-1	3	543	L1	3	0	0
9/4/19	4e835b00	L1-1	3	534	L1	3	0	0
9/5/19	4e835b00	L1-1	3	525	L1	3	0	0
9/6/19	4e835b00	L1-1	3	542	L1	3	0	0
9/7/19	4e835b00	L1-1	3	543	L1	3	0	0
9/8/19	4e835b00	L1-1	3	536	L1	3	0	0
9/9/19	4e835b00	L1-1	3	534	L1	3	0	0
9/10/19	4e835b00	L1-1	3	545	L1	3	0	0
9/11/19	4e835b00	L1-1	3	555	L1	3	0	0
9/12/19	4e835b00	L1-1	3	542	L1	3	0	0
9/13/19	4e835b00	L1-1	3	551	L1	3	0	0
9/14/19	4e835b00	L1-1	3	566	L1	3	0	0
9/15/19	4e835b00	L1-1	3	566	L1	3	0	0
9/16/19	4e835b00	L1-1	3	552	L1	3	0	0
9/17/19	4e835b00	L1-1	3	581	L1	3	0	0
9/18/19	4e835b00	L1-1	3	584	L1	3	0	0
9/19/19	4e835b00	L1-1	3	586	L1	3	0	0
9/20/19	4e835b00	L1-1	3	572	L1	3	0	0
9/21/19	4e835b00	L1-1	3	586	L1	3	0	0
9/22/19	4e835b00	L1-1	3	571	L1	3	0	0
9/23/19	4e835b00	L1-1	3	561	L1	3	0	0
9/24/19	4e835b00	L1-1	3	572	L1	3	0	0
9/25/19	4e835b00	L1-1	3	580	L1	3	0	0
9/26/19	4e835b00	L1-1	3	577	L1	3	0	0
9/27/19	4e835b00	L1-1	3	557	L1	3	0	0
9/30/19	4e835b00	L1-1	3	569	L1	3	0	0
10/1/19	4e835b00	L1-1	3	563	L1	3	0	0
10/2/19	4e835b00	L1-1	3	590	L1	3	0	0
10/3/19	4e835b00	L1-1	3	424	L1	3	0	0
10/4/19	4e835b00	L1-1	3	306	L1	3	0	0
10/5/19	4e835b00	L1-1	3	254	L1	3	0	0
10/6/19	4e835b00	L1-1	3	278	L1	3	0	0
10/7/19	4e835b00	L1-1	3	298	L1	3	0	0
10/8/19	4e835b00	L1-1	3	274	L1	3	0	0
10/9/19	4e835b00	L1-1	3	566	L1	3	0	0
10/10/19	4e835b00	L1-1	3	556	L1	3	0	0
10/11/19	4e835b00	L1-1	3	295	L1	3	0	0
10/12/19	4e835b00	L1-1	3	585	L1	3	0	0
10/13/19	4e835b00	L1-1	3	548	L1	3	0	0
10/14/19	4e835b00	L1-1	3	427	L1	3	0	0
10/15/19	4e835b00	L1-1	3	281	L1	3	0	0
10/16/19	4e835b00	L1-1	3	277	L1	3	0	0
10/17/19	4e835b00	L1-1	3	274	L1	3	0	0
10/18/19	4e835b00	L1-1	3	329	L1	3	0	0
10/19/19	4e835b00	L1-1	3	280	L1	3	0	0
10/20/19	4e835b00	L1-1	3	192	L1	3	0	0
10/21/19	4e835b00	L1-1	3	75	L1	3	0	0
10/24/19	4e835b00	L1-1	3	556	L1	3	0	0
10/25/19	4e835b00	L1-1	3	359	L1	3	0	0
10/26/19	4e835b00	L1-1	3	502	L1	3	0	0
10/27/19	4e835b00	L1-1	3	535	L1	3	0	0
10/28/19	4e835b00	L1-1	3	537	L1	3	0	0
10/29/19	4e835b00	L1-1	3	549	L1	3	0	0
10/30/19	4e835b00	L1-1	3	548	L1	3	0	0
10/31/19	4e835b00	L1-1	3	563	L1	3	0	0
11/1/19	4e835b00	L1-1	3	541	L1	3	0	0
11/2/19	4e835b00	L1-1	3	540	L1	3	0	0
11/3/19	4e835b00	L1-1	3	546	L1	3	0	0
11/4/19	4e835b00	L1-1	3	516	L1	3	0	0
11/5/19	4e835b00	L1-1	3	543	L1	3	0	0
11/6/19	4e835b00	L1-1	3	533	L1	3	0	0
11/7/19	4e835b00	L1-1	3	512	L1	3	0	0
11/8/19	4e835b00	L1-1	3	519	L1	3	0	0
11/9/19	4e835b00	L1-1	3	523	L1	3	0	0
11/10/19	4e835b00	L1-1	3	513	L1	3	0	0
11/11/19	4e835b00	L1-1	3	526	L1	3	0	0
11/12/19	4e835b00	L1-1	3	523	L1	3	0	0
11/13/19	4e835b00	L1-1	3	526	L1	3	0	0
11/14/19	4e835b00	L1-1	3	527	L1	3	0	0
11/15/19	4e835b00	L1-1	3	483	L1	3	0	0
11/16/19	4e835b00	L1-1	3	485	L1	3	0	0
11/17/19	4e835b00	L1-1	3	495	L1	3	0	0
11/18/19	4e835b00	L1-1	3	517	L1	3	0	0
11/19/19	4e835b00	L1-1	3	502	L1	3	0	0
11/20/19	4e835b00	L1-1	3	526	L1	3	0	0
11/21/19	4e835b00	L1-1	3	502	L1	3	0	0
11/22/19	4e835b00	L1-1	3	533	L1	3	0	0
11/23/19	4e835b00	L1-1	3	530	L1	3	0	0
11/24/19	4e835b00	L1-1	3	537	L1	3	0	0
11/25/19	4e835b00	L1-1	3	536	L1	3	0	0
11/26/19	4e835b00	L1-1	3	534	L1	3	0	0
11/27/19	4e835b00	L1-1	3	544	L1	3	0	0
11/28/19	4e835b00	L1-1	3	532	L1	3	0	0
11/29/19	4e835b00	L1-1	3	536	L1	3	0	0
11/30/19	4e835b00	L1-1	3	522	L1	3	0	0
12/1/19	4e835b00	L1-1	3	539	L1	3	0	0
12/2/19	4e835b00	L1-1	3	543	L1	3	0	0
12/3/19	4e835b00	L1-1	3	512	L1	3	0	0
12/4/19	4e835b00	L1-1	3	517	L1	3	0	0
12/5/19	4e835b00	L1-1	3	528	L1	3	0	0
12/6/19	4e835b00	L1-1	3	526	L1	3	0	0
12/7/19	4e835b00	L1-1	3	483	L1	3	0	0
12/8/19	4e835b00	L1-1	3	542	L1	3	0	0
12/9/19	4e835b00	L1-1	3	486	L1	3	0	0
12/10/19	4e835b00	L1-1	3	499	L1	3	0	0
12/11/19	4e835b00	L1-1	3	522	L1	3	0	0
12/12/19	4e835b00	L1-1	3	523	L1	3	0	0
12/13/19	4e835b00	L1-1	3	501	L1	3	0	0
12/14/19	4e835b00	L1-1	3	549	L1	3	0	0
12/15/19	4e835b00	L1-1	3	518	L1	3	0	0
12/16/19	4e835b00	L1-1	3	537	L1	3	0	0
12/17/19	4e835b00	L1-1	3	534	L1	3	0	0
12/18/19	4e835b00	L1-1	3	510	L1	3	0	0
12/19/19	4e835b00	L1-1	3	505	L1	3	0	0
12/20/19	4e835b00	L1-1	3	517	L1	3	0	0
12/21/19	4e835b00	L1-1	3	490	L1	3	0	0
12/22/19	4e835b00	L1-1	3	517	L1	3	0	0
12/23/19	4e835b00	L1-1	3	562	L1	3	0	0
12/24/19	4e835b00	L1-1	3	558	L1	3	0	0
12/25/19	4e835b00	L1-1	3	527	L1	3	0	0
12/26/19	4e835b00	L1-1	3	546	L1	3	0	0
12/27/19	4e835b00	L1-1	3	533	L1	3	0	0
12/28/19	4e835b00	L1-1	3	537	L1	3	0	0
12/29/19	4e835b00	L1-1	3	506	L1	3	0	0
12/30/19	4e835b00	L1-1	3	521	L1	3	0	0
12/31/19	4e835b00	L1-1	3	539	L1	3	0	0
1/1/20	4e835b00	L1-1	3	513	L1	3	0	0
1/2/20	4e835b00	L1-1	3	523	L1	3	0	0
1/3/20	4e835b00	L1-1	3	538	L1	3	0	0
1/4/20	4e835b00	L1-1	3	514	L1	3	0	0
1/5/20	4e835b00	L1-1	3	517	L1	3	0	0
1/6/20	4e835b00	L1-1	3	528	L1	3	0	0
1/7/20	4e835b00	L1-1	3	530	L1	3	0	0
1/8/20	4e835b00	L1-1	3	517	L1	3	0	0
1/9/20	4e835b00	L1-1	3	529	L1	3	0	0
1/10/20	4e835b00	L1-1	3	492	L1	3	0	0
1/14/20	4e835b00	L1-1	3	531	L1	3	0	0
1/15/20	4e835b00	L1-1	3	439	L1	3	0	0
1/16/20	4e835b00	L1-1	3	492	L1	3	0	0
1/17/20	4e835b00	L1-1	3	264	L1	3	0	0
8/31/19	6c793e00	L1-2	3	509	L1	3	0	0
9/1/19	6c793e00	L1-2	3	499	L1	3	0	0
9/2/19	6c793e00	L1-2	3	502	L1	3	0	0
9/3/19	6c793e00	L1-2	3	468	L1	3	0	0
9/4/19	6c793e00	L1-2	3	496	L1	3	0	0
9/5/19	6c793e00	L1-2	3	514	L1	3	0	0
9/6/19	6c793e00	L1-2	3	509	L1	3	0	0
9/7/19	6c793e00	L1-2	3	484	L1	3	0	0
9/8/19	6c793e00	L1-2	3	490	L1	3	0	0
9/9/19	6c793e00	L1-2	3	510	L1	3	0	0
9/10/19	6c793e00	L1-2	3	517	L1	3	0	0
9/11/19	6c793e00	L1-2	3	510	L1	3	0	0
9/12/19	6c793e00	L1-2	3	508	L1	3	0	0
9/13/19	6c793e00	L1-2	3	511	L1	3	0	0
9/14/19	6c793e00	L1-2	3	507	L1	3	0	0
9/15/19	6c793e00	L1-2	3	487	L1	3	0	0
9/16/19	6c793e00	L1-2	3	505	L1	3	0	0
9/17/19	6c793e00	L1-2	3	489	L1	3	0	0
9/18/19	6c793e00	L1-2	3	496	L1	3	0	0
9/19/19	6c793e00	L1-2	3	488	L1	3	0	0
9/20/19	6c793e00	L1-2	3	520	L1	3	0	0
9/21/19	6c793e00	L1-2	3	512	L1	3	0	0
9/22/19	6c793e00	L1-2	3	488	L1	3	0	0
9/23/19	6c793e00	L1-2	3	486	L1	3	0	0
9/24/19	6c793e00	L1-2	3	486	L1	3	0	0
9/25/19	6c793e00	L1-2	3	521	L1	3	0	0
9/26/19	6c793e00	L1-2	3	495	L1	3	0	0
9/27/19	6c793e00	L1-2	3	520	L1	3	0	0
9/30/19	6c793e00	L1-2	3	504	L1	3	0	0
10/1/19	6c793e00	L1-2	3	525	L1	3	0	0
10/2/19	6c793e00	L1-2	3	486	L1	3	0	0
10/3/19	6c793e00	L1-2	3	487	L1	3	0	0
10/4/19	6c793e00	L1-2	3	500	L1	3	0	0
10/5/19	6c793e00	L1-2	3	499	L1	3	0	0
10/6/19	6c793e00	L1-2	3	488	L1	3	0	0
10/7/19	6c793e00	L1-2	3	448	L1	3	0	0
10/8/19	6c793e00	L1-2	3	494	L1	3	0	0
10/9/19	6c793e00	L1-2	3	501	L1	3	0	0
10/10/19	6c793e00	L1-2	3	500	L1	3	0	0
10/11/19	6c793e00	L1-2	3	510	L1	3	0	0
10/12/19	6c793e00	L1-2	3	493	L1	3	0	0
10/13/19	6c793e00	L1-2	3	488	L1	3	0	0
10/14/19	6c793e00	L1-2	3	500	L1	3	0	0
10/15/19	6c793e00	L1-2	3	511	L1	3	0	0
10/16/19	6c793e00	L1-2	3	489	L1	3	0	0
10/17/19	6c793e00	L1-2	3	480	L1	3	0	0
10/18/19	6c793e00	L1-2	3	504	L1	3	0	0
10/19/19	6c793e00	L1-2	3	494	L1	3	0	0
10/20/19	6c793e00	L1-2	3	476	L1	3	0	0
10/21/19	6c793e00	L1-2	3	527	L1	3	0	0
10/24/19	6c793e00	L1-2	3	492	L1	3	0	0
10/25/19	6c793e00	L1-2	3	492	L1	3	0	0
10/26/19	6c793e00	L1-2	3	493	L1	3	0	0
10/27/19	6c793e00	L1-2	3	482	L1	3	0	0
10/28/19	6c793e00	L1-2	3	476	L1	3	0	0
10/29/19	6c793e00	L1-2	3	495	L1	3	0	0
10/30/19	6c793e00	L1-2	3	477	L1	3	0	0
10/31/19	6c793e00	L1-2	3	463	L1	3	0	0
11/1/19	6c793e00	L1-2	3	497	L1	3	0	0
11/2/19	6c793e00	L1-2	3	496	L1	3	0	0
11/3/19	6c793e00	L1-2	3	488	L1	3	0	0
11/4/19	6c793e00	L1-2	3	475	L1	3	0	0
11/5/19	6c793e00	L1-2	3	496	L1	3	0	0
11/6/19	6c793e00	L1-2	3	481	L1	3	0	0
11/7/19	6c793e00	L1-2	3	469	L1	3	0	0
11/8/19	6c793e00	L1-2	3	468	L1	3	0	0
11/9/19	6c793e00	L1-2	3	451	L1	3	0	0
11/10/19	6c793e00	L1-2	3	475	L1	3	0	0
11/11/19	6c793e00	L1-2	3	473	L1	3	0	0
11/12/19	6c793e00	L1-2	3	457	L1	3	0	0
11/13/19	6c793e00	L1-2	3	471	L1	3	0	0
11/14/19	6c793e00	L1-2	3	478	L1	3	0	0
11/15/19	6c793e00	L1-2	3	465	L1	3	0	0
11/16/19	6c793e00	L1-2	3	478	L1	3	0	0
11/17/19	6c793e00	L1-2	3	464	L1	3	0	0
11/18/19	6c793e00	L1-2	3	473	L1	3	0	0
11/19/19	6c793e00	L1-2	3	490	L1	3	0	0
11/20/19	6c793e00	L1-2	3	480	L1	3	0	0
11/21/19	6c793e00	L1-2	3	470	L1	3	0	0
11/22/19	6c793e00	L1-2	3	437	L1	3	0	0
11/23/19	6c793e00	L1-2	3	423	L1	3	0	0
11/24/19	6c793e00	L1-2	3	431	L1	3	0	0
11/25/19	6c793e00	L1-2	3	417	L1	3	0	0
11/26/19	6c793e00	L1-2	3	414	L1	3	0	0
11/27/19	6c793e00	L1-2	3	431	L1	3	0	0
11/28/19	6c793e00	L1-2	3	436	L1	3	0	0
11/29/19	6c793e00	L1-2	3	433	L1	3	0	0
11/30/19	6c793e00	L1-2	3	414	L1	3	0	0
12/1/19	6c793e00	L1-2	3	425	L1	3	0	0
12/2/19	6c793e00	L1-2	3	412	L1	3	0	0
12/3/19	6c793e00	L1-2	3	434	L1	3	0	0
12/4/19	6c793e00	L1-2	3	426	L1	3	0	0
12/5/19	6c793e00	L1-2	3	432	L1	3	0	0
12/6/19	6c793e00	L1-2	3	425	L1	3	0	0
12/7/19	6c793e00	L1-2	3	411	L1	3	0	0
12/8/19	6c793e00	L1-2	3	431	L1	3	0	0
12/9/19	6c793e00	L1-2	3	411	L1	3	0	0
12/10/19	6c793e00	L1-2	3	420	L1	3	0	0
12/11/19	6c793e00	L1-2	3	430	L1	3	0	0
12/12/19	6c793e00	L1-2	3	425	L1	3	0	0
12/13/19	6c793e00	L1-2	3	409	L1	3	0	0
12/14/19	6c793e00	L1-2	3	423	L1	3	0	0
12/15/19	6c793e00	L1-2	3	406	L1	3	0	0
12/16/19	6c793e00	L1-2	3	417	L1	3	0	0
12/17/19	6c793e00	L1-2	3	404	L1	3	0	0
12/18/19	6c793e00	L1-2	3	426	L1	3	0	0
12/19/19	6c793e00	L1-2	3	413	L1	3	0	0
12/20/19	6c793e00	L1-2	3	402	L1	3	0	0
12/21/19	6c793e00	L1-2	3	402	L1	3	0	0
12/22/19	6c793e00	L1-2	3	390	L1	3	0	0
12/23/19	6c793e00	L1-2	3	405	L1	3	0	0
12/24/19	6c793e00	L1-2	3	398	L1	3	0	0
12/25/19	6c793e00	L1-2	3	394	L1	3	0	0
12/26/19	6c793e00	L1-2	3	397	L1	3	0	0
12/27/19	6c793e00	L1-2	3	394	L1	3	0	0
12/28/19	6c793e00	L1-2	3	415	L1	3	0	0
12/29/19	6c793e00	L1-2	3	407	L1	3	0	0
12/30/19	6c793e00	L1-2	3	397	L1	3	0	0
12/31/19	6c793e00	L1-2	3	417	L1	3	0	0
1/1/20	6c793e00	L1-2	3	408	L1	3	0	0
1/2/20	6c793e00	L1-2	3	394	L1	3	0	0
1/3/20	6c793e00	L1-2	3	402	L1	3	0	0
1/4/20	6c793e00	L1-2	3	399	L1	3	0	0
1/5/20	6c793e00	L1-2	3	411	L1	3	0	0
1/6/20	6c793e00	L1-2	2	417	L1	3	1	0
1/7/20	6c793e00	L1-2	3	419	L1	3	0	0
1/8/20	6c793e00	L1-2	3	402	L1	3	0	0
1/9/20	6c793e00	L1-2	3	399	L1	3	0	0
1/10/20	6c793e00	L1-2	3	402	L1	3	0	0
1/14/20	6c793e00	L1-2	3	410	L1	3	0	0
1/15/20	6c793e00	L1-2	3	405	L1	3	0	0
1/16/20	6c793e00	L1-2	3	388	L1	3	0	0
1/17/20	6c793e00	L1-2	3	390	L1	3	0	0
8/30/19	3d8e5b00	L1-3	1	632	L1	7	6	0
8/31/19	3d8e5b00	L1-3	7	596	L1	7	0	0
9/1/19	3d8e5b00	L1-3	7	617	L1	7	0	0
9/2/19	3d8e5b00	L1-3	7	599	L1	7	0	0
9/3/19	3d8e5b00	L1-3	7	604	L1	7	0	0
9/4/19	3d8e5b00	L1-3	7	607	L1	7	0	0
9/5/19	3d8e5b00	L1-3	7	615	L1	7	0	0
9/6/19	3d8e5b00	L1-3	7	617	L1	7	0	0
9/7/19	3d8e5b00	L1-3	7	627	L1	7	0	0
9/8/19	3d8e5b00	L1-3	7	604	L1	7	0	0
9/9/19	3d8e5b00	L1-3	7	626	L1	7	0	0
9/10/19	3d8e5b00	L1-3	7	596	L1	7	0	0
9/11/19	3d8e5b00	L1-3	7	587	L1	7	0	0
9/12/19	3d8e5b00	L1-3	7	613	L1	7	0	0
9/13/19	3d8e5b00	L1-3	7	608	L1	7	0	0
9/14/19	3d8e5b00	L1-3	7	621	L1	7	0	0
9/15/19	3d8e5b00	L1-3	7	644	L1	7	0	0
9/16/19	3d8e5b00	L1-3	6	633	L1	7	1	0
9/17/19	3d8e5b00	L1-3	7	632	L1	7	0	0
9/18/19	3d8e5b00	L1-3	7	636	L1	7	0	0
9/19/19	3d8e5b00	L1-3	7	623	L1	7	0	0
9/20/19	3d8e5b00	L1-3	7	616	L1	7	0	0
9/21/19	3d8e5b00	L1-3	7	583	L1	7	0	0
9/22/19	3d8e5b00	L1-3	7	593	L1	7	0	0
9/23/19	3d8e5b00	L1-3	7	595	L1	7	0	0
9/24/19	3d8e5b00	L1-3	7	627	L1	7	0	0
9/25/19	3d8e5b00	L1-3	7	628	L1	7	0	0
9/26/19	3d8e5b00	L1-3	7	611	L1	7	0	0
9/27/19	3d8e5b00	L1-3	7	601	L1	7	0	0
9/29/19	3d8e5b00	L1-3	3	599	L1	7	4	0
9/30/19	3d8e5b00	L1-3	7	607	L1	7	0	0
10/1/19	3d8e5b00	L1-3	7	643	L1	7	0	0
10/2/19	3d8e5b00	L1-3	7	601	L1	7	0	0
10/3/19	3d8e5b00	L1-3	7	599	L1	7	0	0
10/4/19	3d8e5b00	L1-3	7	605	L1	7	0	0
10/5/19	3d8e5b00	L1-3	7	602	L1	7	0	0
10/6/19	3d8e5b00	L1-3	7	604	L1	7	0	0
10/7/19	3d8e5b00	L1-3	7	624	L1	7	0	0
10/8/19	3d8e5b00	L1-3	7	600	L1	7	0	0
10/9/19	3d8e5b00	L1-3	7	575	L1	7	0	0
10/10/19	3d8e5b00	L1-3	7	576	L1	7	0	0
10/11/19	3d8e5b00	L1-3	6	600	L1	7	1	0
10/12/19	3d8e5b00	L1-3	7	608	L1	7	0	0
10/13/19	3d8e5b00	L1-3	7	621	L1	7	0	0
10/14/19	3d8e5b00	L1-3	7	619	L1	7	0	0
10/15/19	3d8e5b00	L1-3	7	617	L1	7	0	0
10/16/19	3d8e5b00	L1-3	7	620	L1	7	0	0
10/17/19	3d8e5b00	L1-3	7	601	L1	7	0	0
10/18/19	3d8e5b00	L1-3	7	630	L1	7	0	0
10/19/19	3d8e5b00	L1-3	7	570	L1	7	0	0
10/20/19	3d8e5b00	L1-3	7	419	L1	7	0	0
10/21/19	3d8e5b00	L1-3	7	505	L1	7	0	0
10/23/19	3d8e5b00	L1-3	2	610	L1	7	5	0
10/24/19	3d8e5b00	L1-3	7	659	L1	7	0	0
10/25/19	3d8e5b00	L1-3	7	637	L1	7	0	0
10/26/19	3d8e5b00	L1-3	7	628	L1	7	0	0
10/27/19	3d8e5b00	L1-3	7	626	L1	7	0	0
10/28/19	3d8e5b00	L1-3	7	624	L1	7	0	0
10/29/19	3d8e5b00	L1-3	7	625	L1	7	0	0
10/30/19	3d8e5b00	L1-3	7	614	L1	7	0	0
10/31/19	3d8e5b00	L1-3	5	620	L1	7	2	0
11/11/19	3d8e5b00	L1-3	3	643	L1	7	4	0
11/12/19	3d8e5b00	L1-3	6	643	L1	7	1	0
11/13/19	3d8e5b00	L1-3	7	636	L1	7	0	0
11/14/19	3d8e5b00	L1-3	7	614	L1	7	0	0
11/15/19	3d8e5b00	L1-3	7	626	L1	7	0	0
11/16/19	3d8e5b00	L1-3	7	638	L1	7	0	0
11/17/19	3d8e5b00	L1-3	7	620	L1	7	0	0
11/18/19	3d8e5b00	L1-3	7	645	L1	7	0	0
11/19/19	3d8e5b00	L1-3	5	652	L1	7	2	0
11/20/19	3d8e5b00	L1-3	7	663	L1	7	0	0
11/21/19	3d8e5b00	L1-3	6	642	L1	7	1	0
11/22/19	3d8e5b00	L1-3	7	634	L1	7	0	0
11/23/19	3d8e5b00	L1-3	7	660	L1	7	0	0
11/24/19	3d8e5b00	L1-3	7	614	L1	7	0	0
11/25/19	3d8e5b00	L1-3	7	602	L1	7	0	0
11/26/19	3d8e5b00	L1-3	7	583	L1	7	0	0
11/27/19	3d8e5b00	L1-3	7	593	L1	7	0	0
11/28/19	3d8e5b00	L1-3	7	593	L1	7	0	0
11/29/19	3d8e5b00	L1-3	7	597	L1	7	0	0
11/30/19	3d8e5b00	L1-3	7	599	L1	7	0	0
12/1/19	3d8e5b00	L1-3	7	599	L1	7	0	0
12/2/19	3d8e5b00	L1-3	6	584	L1	7	1	0
12/3/19	3d8e5b00	L1-3	7	599	L1	7	0	0
12/4/19	3d8e5b00	L1-3	7	592	L1	7	0	0
12/5/19	3d8e5b00	L1-3	7	574	L1	7	0	0
12/6/19	3d8e5b00	L1-3	7	608	L1	7	0	0
12/7/19	3d8e5b00	L1-3	7	639	L1	7	0	0
12/8/19	3d8e5b00	L1-3	7	612	L1	7	0	0
12/9/19	3d8e5b00	L1-3	7	607	L1	7	0	0
12/10/19	3d8e5b00	L1-3	7	593	L1	7	0	0
12/11/19	3d8e5b00	L1-3	7	582	L1	7	0	0
12/12/19	3d8e5b00	L1-3	7	617	L1	7	0	0
12/13/19	3d8e5b00	L1-3	7	584	L1	7	0	0
12/14/19	3d8e5b00	L1-3	7	602	L1	7	0	0
12/15/19	3d8e5b00	L1-3	7	554	L1	7	0	0
12/16/19	3d8e5b00	L1-3	7	583	L1	7	0	0
12/17/19	3d8e5b00	L1-3	3	537	L1	7	4	0
12/18/19	3d8e5b00	L1-3	7	606	L1	7	0	0
12/19/19	3d8e5b00	L1-3	7	591	L1	7	0	0
12/20/19	3d8e5b00	L1-3	7	594	L1	7	0	0
12/21/19	3d8e5b00	L1-3	7	581	L1	7	0	0
12/22/19	3d8e5b00	L1-3	7	585	L1	7	0	0
12/23/19	3d8e5b00	L1-3	6	592	L1	7	1	0
12/24/19	3d8e5b00	L1-3	6	586	L1	7	1	0
12/25/19	3d8e5b00	L1-3	7	582	L1	7	0	0
12/26/19	3d8e5b00	L1-3	7	584	L1	7	0	0
12/27/19	3d8e5b00	L1-3	6	596	L1	7	1	0
12/28/19	3d8e5b00	L1-3	6	563	L1	7	1	0
12/29/19	3d8e5b00	L1-3	7	652	L1	7	0	0
12/30/19	3d8e5b00	L1-3	7	618	L1	7	0	0
12/31/19	3d8e5b00	L1-3	7	621	L1	7	0	0
1/1/20	3d8e5b00	L1-3	7	624	L1	7	0	0
1/2/20	3d8e5b00	L1-3	7	615	L1	7	0	0
1/3/20	3d8e5b00	L1-3	4	641	L1	7	3	0
1/4/20	3d8e5b00	L1-3	7	631	L1	7	0	0
1/5/20	3d8e5b00	L1-3	7	517	L1	7	0	0
1/6/20	3d8e5b00	L1-3	7	622	L1	7	0	0
1/7/20	3d8e5b00	L1-3	7	602	L1	7	0	0
1/8/20	3d8e5b00	L1-3	7	575	L1	7	0	0
1/9/20	3d8e5b00	L1-3	7	545	L1	7	0	0
1/10/20	3d8e5b00	L1-3	4	458	L1	7	3	0
1/13/20	3d8e5b00	L1-3	4	585	L1	7	3	0
1/14/20	3d8e5b00	L1-3	7	599	L1	7	0	0
1/15/20	3d8e5b00	L1-3	7	599	L1	7	0	0
1/16/20	3d8e5b00	L1-3	7	588	L1	7	0	0
1/17/20	3d8e5b00	L1-3	3	558	L1	7	4	0
2/25/20	3d8e5b00	L1-3	2	654	L1	7	5	0
2/26/20	3d8e5b00	L1-3	7	602	L1	7	0	0
2/27/20	3d8e5b00	L1-3	7	615	L1	7	0	0
2/28/20	3d8e5b00	L1-3	7	595	L1	7	0	0
2/29/20	3d8e5b00	L1-3	7	573	L1	7	0	0
3/1/20	3d8e5b00	L1-3	7	599	L1	7	0	0
3/2/20	3d8e5b00	L1-3	7	569	L1	7	0	0
3/3/20	3d8e5b00	L1-3	1	580	L1	7	6	0
3/4/20	3d8e5b00	L1-3	7	577	L1	7	0	0
3/5/20	3d8e5b00	L1-3	7	564	L1	7	0	0
3/6/20	3d8e5b00	L1-3	6	596	L1	7	1	0
3/7/20	3d8e5b00	L1-3	7	603	L1	7	0	0
3/8/20	3d8e5b00	L1-3	7	584	L1	7	0	0
3/9/20	3d8e5b00	L1-3	7	591	L1	7	0	0
3/10/20	3d8e5b00	L1-3	7	628	L1	7	0	0
3/11/20	3d8e5b00	L1-3	7	598	L1	7	0	0
3/12/20	3d8e5b00	L1-3	7	596	L1	7	0	0
3/13/20	3d8e5b00	L1-3	7	608	L1	7	0	0
3/14/20	3d8e5b00	L1-3	7	568	L1	7	0	0
3/15/20	3d8e5b00	L1-3	7	549	L1	7	0	0
3/16/20	3d8e5b00	L1-3	7	584	L1	7	0	0
3/17/20	3d8e5b00	L1-3	7	602	L1	7	0	0
3/18/20	3d8e5b00	L1-3	7	611	L1	7	0	0
3/19/20	3d8e5b00	L1-3	7	581	L1	7	0	0
3/20/20	3d8e5b00	L1-3	7	574	L1	7	0	0
3/21/20	3d8e5b00	L1-3	7	607	L1	7	0	0
3/22/20	3d8e5b00	L1-3	7	590	L1	7	0	0
3/23/20	3d8e5b00	L1-3	7	584	L1	7	0	0
3/24/20	3d8e5b00	L1-3	7	574	L1	7	0	0
3/25/20	3d8e5b00	L1-3	7	569	L1	7	0	0
3/26/20	3d8e5b00	L1-3	7	573	L1	7	0	0
3/27/20	3d8e5b00	L1-3	7	568	L1	7	0	0
3/28/20	3d8e5b00	L1-3	6	552	L1	7	1	0
3/29/20	3d8e5b00	L1-3	7	581	L1	7	0	0
3/30/20	3d8e5b00	L1-3	7	586	L1	7	0	0
3/31/20	3d8e5b00	L1-3	7	575	L1	7	0	0
4/1/20	3d8e5b00	L1-3	7	573	L1	7	0	0
4/2/20	3d8e5b00	L1-3	7	583	L1	7	0	0
4/3/20	3d8e5b00	L1-3	7	595	L1	7	0	0
4/4/20	3d8e5b00	L1-3	7	556	L1	7	0	0
4/5/20	3d8e5b00	L1-3	7	578	L1	7	0	0
4/6/20	3d8e5b00	L1-3	7	575	L1	7	0	0
4/7/20	3d8e5b00	L1-3	7	584	L1	7	0	0
4/8/20	3d8e5b00	L1-3	7	577	L1	7	0	0
4/9/20	3d8e5b00	L1-3	7	577	L1	7	0	0
4/10/20	3d8e5b00	L1-3	7	569	L1	7	0	0
4/11/20	3d8e5b00	L1-3	7	576	L1	7	0	0
4/12/20	3d8e5b00	L1-3	7	569	L1	7	0	0
4/13/20	3d8e5b00	L1-3	7	537	L1	7	0	0
4/14/20	3d8e5b00	L1-3	7	566	L1	7	0	0
4/15/20	3d8e5b00	L1-3	7	568	L1	7	0	0
4/16/20	3d8e5b00	L1-3	7	544	L1	7	0	0
4/17/20	3d8e5b00	L1-3	7	546	L1	7	0	0
4/18/20	3d8e5b00	L1-3	6	556	L1	7	1	0
4/19/20	3d8e5b00	L1-3	7	562	L1	7	0	0
4/20/20	3d8e5b00	L1-3	7	368	L1	7	0	0
4/21/20	3d8e5b00	L1-3	7	126	L1	7	0	0
4/22/20	3d8e5b00	L1-3	7	214	L1	7	0	0
4/23/20	3d8e5b00	L1-3	7	559	L1	7	0	0
8/30/19	c38c5b00	L1-4	1	27	L1	7	6	0
8/31/19	c38c5b00	L1-4	7	29	L1	7	0	0
9/1/19	c38c5b00	L1-4	7	30	L1	7	0	0
9/2/19	c38c5b00	L1-4	7	28	L1	7	0	0
9/3/19	c38c5b00	L1-4	7	29	L1	7	0	0
9/4/19	c38c5b00	L1-4	7	30	L1	7	0	0
9/5/19	c38c5b00	L1-4	7	29	L1	7	0	0
9/6/19	c38c5b00	L1-4	7	28	L1	7	0	0
9/7/19	c38c5b00	L1-4	7	28	L1	7	0	0
9/8/19	c38c5b00	L1-4	7	28	L1	7	0	0
9/9/19	c38c5b00	L1-4	7	28	L1	7	0	0
9/10/19	c38c5b00	L1-4	7	28	L1	7	0	0
9/11/19	c38c5b00	L1-4	6	29	L1	7	1	0
9/12/19	c38c5b00	L1-4	7	29	L1	7	0	0
9/13/19	c38c5b00	L1-4	7	29	L1	7	0	0
9/14/19	c38c5b00	L1-4	7	30	L1	7	0	0
9/15/19	c38c5b00	L1-4	7	30	L1	7	0	0
9/16/19	c38c5b00	L1-4	7	28	L1	7	0	0
9/17/19	c38c5b00	L1-4	7	28	L1	7	0	0
9/18/19	c38c5b00	L1-4	7	27	L1	7	0	0
9/19/19	c38c5b00	L1-4	7	26	L1	7	0	0
9/20/19	c38c5b00	L1-4	7	27	L1	7	0	0
9/21/19	c38c5b00	L1-4	7	26	L1	7	0	0
9/22/19	c38c5b00	L1-4	7	26	L1	7	0	0
9/23/19	c38c5b00	L1-4	7	25	L1	7	0	0
9/24/19	c38c5b00	L1-4	7	25	L1	7	0	0
9/25/19	c38c5b00	L1-4	7	26	L1	7	0	0
9/26/19	c38c5b00	L1-4	7	27	L1	7	0	0
9/27/19	c38c5b00	L1-4	7	29	L1	7	0	0
9/29/19	c38c5b00	L1-4	3	584	L1	7	4	0
9/30/19	c38c5b00	L1-4	7	578	L1	7	0	0
10/1/19	c38c5b00	L1-4	7	575	L1	7	0	0
10/2/19	c38c5b00	L1-4	7	437	L1	7	0	0
10/3/19	c38c5b00	L1-4	7	370	L1	7	0	0
10/4/19	c38c5b00	L1-4	7	360	L1	7	0	0
10/5/19	c38c5b00	L1-4	7	346	L1	7	0	0
10/6/19	c38c5b00	L1-4	7	358	L1	7	0	0
10/7/19	c38c5b00	L1-4	7	362	L1	7	0	0
10/8/19	c38c5b00	L1-4	7	479	L1	7	0	0
10/9/19	c38c5b00	L1-4	7	379	L1	7	0	0
10/10/19	c38c5b00	L1-4	7	327	L1	7	0	0
10/11/19	c38c5b00	L1-4	7	338	L1	7	0	0
10/12/19	c38c5b00	L1-4	7	466	L1	7	0	0
10/13/19	c38c5b00	L1-4	7	495	L1	7	0	0
10/14/19	c38c5b00	L1-4	7	347	L1	7	0	0
10/15/19	c38c5b00	L1-4	7	323	L1	7	0	0
10/16/19	c38c5b00	L1-4	6	340	L1	7	1	0
10/17/19	c38c5b00	L1-4	7	351	L1	7	0	0
10/18/19	c38c5b00	L1-4	7	334	L1	7	0	0
10/19/19	c38c5b00	L1-4	7	432	L1	7	0	0
10/20/19	c38c5b00	L1-4	7	196	L1	7	0	0
10/21/19	c38c5b00	L1-4	7	252	L1	7	0	0
10/23/19	c38c5b00	L1-4	2	340	L1	7	5	0
10/24/19	c38c5b00	L1-4	7	378	L1	7	0	0
10/25/19	c38c5b00	L1-4	7	514	L1	7	0	0
10/26/19	c38c5b00	L1-4	7	535	L1	7	0	0
10/27/19	c38c5b00	L1-4	7	540	L1	7	0	0
10/28/19	c38c5b00	L1-4	7	549	L1	7	0	0
10/29/19	c38c5b00	L1-4	7	559	L1	7	0	0
10/30/19	c38c5b00	L1-4	7	563	L1	7	0	0
10/31/19	c38c5b00	L1-4	7	561	L1	7	0	0
11/1/19	c38c5b00	L1-4	7	579	L1	7	0	0
11/2/19	c38c5b00	L1-4	7	553	L1	7	0	0
11/3/19	c38c5b00	L1-4	7	566	L1	7	0	0
11/4/19	c38c5b00	L1-4	7	567	L1	7	0	0
11/5/19	c38c5b00	L1-4	4	584	L1	7	3	0
11/11/19	c38c5b00	L1-4	3	511	L1	7	4	0
11/12/19	c38c5b00	L1-4	7	502	L1	7	0	0
11/13/19	c38c5b00	L1-4	7	521	L1	7	0	0
11/14/19	c38c5b00	L1-4	7	538	L1	7	0	0
11/15/19	c38c5b00	L1-4	7	574	L1	7	0	0
11/16/19	c38c5b00	L1-4	7	559	L1	7	0	0
11/17/19	c38c5b00	L1-4	7	557	L1	7	0	0
11/18/19	c38c5b00	L1-4	1	532	L1	7	6	0
11/21/19	c38c5b00	L1-4	4	510	L1	7	3	0
11/22/19	c38c5b00	L1-4	7	517	L1	7	0	0
11/23/19	c38c5b00	L1-4	7	521	L1	7	0	0
11/24/19	c38c5b00	L1-4	7	508	L1	7	0	0
11/25/19	c38c5b00	L1-4	6	522	L1	7	1	0
11/26/19	c38c5b00	L1-4	7	496	L1	7	0	0
11/27/19	c38c5b00	L1-4	7	403	L1	7	0	0
11/28/19	c38c5b00	L1-4	7	365	L1	7	0	0
11/29/19	c38c5b00	L1-4	7	372	L1	7	0	0
11/30/19	c38c5b00	L1-4	7	384	L1	7	0	0
12/1/19	c38c5b00	L1-4	7	374	L1	7	0	0
12/2/19	c38c5b00	L1-4	7	384	L1	7	0	0
12/3/19	c38c5b00	L1-4	7	362	L1	7	0	0
12/4/19	c38c5b00	L1-4	6	399	L1	7	1	0
12/5/19	c38c5b00	L1-4	7	469	L1	7	0	0
12/6/19	c38c5b00	L1-4	7	475	L1	7	0	0
12/7/19	c38c5b00	L1-4	7	463	L1	7	0	0
12/8/19	c38c5b00	L1-4	7	453	L1	7	0	0
12/9/19	c38c5b00	L1-4	7	443	L1	7	0	0
12/10/19	c38c5b00	L1-4	7	463	L1	7	0	0
12/11/19	c38c5b00	L1-4	6	461	L1	7	1	0
12/12/19	c38c5b00	L1-4	7	454	L1	7	0	0
12/13/19	c38c5b00	L1-4	7	458	L1	7	0	0
12/14/19	c38c5b00	L1-4	7	476	L1	7	0	0
12/15/19	c38c5b00	L1-4	7	474	L1	7	0	0
12/16/19	c38c5b00	L1-4	7	484	L1	7	0	0
12/17/19	c38c5b00	L1-4	3	477	L1	7	4	0
12/18/19	c38c5b00	L1-4	7	490	L1	7	0	0
12/19/19	c38c5b00	L1-4	7	504	L1	7	0	0
12/20/19	c38c5b00	L1-4	7	525	L1	7	0	0
12/21/19	c38c5b00	L1-4	7	508	L1	7	0	0
12/22/19	c38c5b00	L1-4	7	513	L1	7	0	0
12/23/19	c38c5b00	L1-4	7	456	L1	7	0	0
12/24/19	c38c5b00	L1-4	7	379	L1	7	0	0
12/25/19	c38c5b00	L1-4	7	359	L1	7	0	0
12/26/19	c38c5b00	L1-4	7	365	L1	7	0	0
12/27/19	c38c5b00	L1-4	6	347	L1	7	1	0
12/28/19	c38c5b00	L1-4	7	300	L1	7	0	0
12/29/19	c38c5b00	L1-4	7	450	L1	7	0	0
12/30/19	c38c5b00	L1-4	7	511	L1	7	0	0
12/31/19	c38c5b00	L1-4	7	556	L1	7	0	0
1/1/20	c38c5b00	L1-4	7	534	L1	7	0	0
1/2/20	c38c5b00	L1-4	7	535	L1	7	0	0
1/3/20	c38c5b00	L1-4	4	537	L1	7	3	0
1/4/20	c38c5b00	L1-4	7	536	L1	7	0	0
1/5/20	c38c5b00	L1-4	7	515	L1	7	0	0
1/6/20	c38c5b00	L1-4	7	530	L1	7	0	0
1/7/20	c38c5b00	L1-4	7	543	L1	7	0	0
1/8/20	c38c5b00	L1-4	7	532	L1	7	0	0
1/9/20	c38c5b00	L1-4	7	538	L1	7	0	0
1/10/20	c38c5b00	L1-4	4	555	L1	7	3	0
1/13/20	c38c5b00	L1-4	4	521	L1	7	3	0
1/14/20	c38c5b00	L1-4	7	516	L1	7	0	0
1/15/20	c38c5b00	L1-4	7	510	L1	7	0	0
1/16/20	c38c5b00	L1-4	7	516	L1	7	0	0
1/17/20	c38c5b00	L1-4	2	531	L1	7	5	0
8/30/19	fa8c5b00	L1-5	1	369	L1	7	6	0
8/31/19	fa8c5b00	L1-5	7	301	L1	7	0	0
9/1/19	fa8c5b00	L1-5	7	329	L1	7	0	0
9/2/19	fa8c5b00	L1-5	7	352	L1	7	0	0
9/3/19	fa8c5b00	L1-5	7	335	L1	7	0	0
9/4/19	fa8c5b00	L1-5	7	306	L1	7	0	0
9/5/19	fa8c5b00	L1-5	7	341	L1	7	0	0
9/6/19	fa8c5b00	L1-5	7	348	L1	7	0	0
9/7/19	fa8c5b00	L1-5	7	351	L1	7	0	0
9/8/19	fa8c5b00	L1-5	7	343	L1	7	0	0
9/9/19	fa8c5b00	L1-5	7	360	L1	7	0	0
9/10/19	fa8c5b00	L1-5	6	360	L1	7	1	0
9/11/19	fa8c5b00	L1-5	7	334	L1	7	0	0
9/12/19	fa8c5b00	L1-5	7	347	L1	7	0	0
9/13/19	fa8c5b00	L1-5	7	346	L1	7	0	0
9/14/19	fa8c5b00	L1-5	6	345	L1	7	1	0
9/15/19	fa8c5b00	L1-5	7	341	L1	7	0	0
9/16/19	fa8c5b00	L1-5	7	340	L1	7	0	0
9/17/19	fa8c5b00	L1-5	7	280	L1	7	0	0
9/18/19	fa8c5b00	L1-5	7	198	L1	7	0	0
9/19/19	fa8c5b00	L1-5	7	232	L1	7	0	0
9/20/19	fa8c5b00	L1-5	7	223	L1	7	0	0
9/21/19	fa8c5b00	L1-5	7	218	L1	7	0	0
9/22/19	fa8c5b00	L1-5	6	220	L1	7	1	0
9/23/19	fa8c5b00	L1-5	7	211	L1	7	0	0
9/24/19	fa8c5b00	L1-5	7	210	L1	7	0	0
9/25/19	fa8c5b00	L1-5	7	215	L1	7	0	0
9/26/19	fa8c5b00	L1-5	7	340	L1	7	0	0
9/27/19	fa8c5b00	L1-5	7	350	L1	7	0	0
9/29/19	fa8c5b00	L1-5	3	381	L1	7	4	0
9/30/19	fa8c5b00	L1-5	7	289	L1	7	0	0
10/1/19	fa8c5b00	L1-5	7	242	L1	7	0	0
10/2/19	fa8c5b00	L1-5	7	380	L1	7	0	0
10/3/19	fa8c5b00	L1-5	7	376	L1	7	0	0
10/4/19	fa8c5b00	L1-5	7	361	L1	7	0	0
10/5/19	fa8c5b00	L1-5	7	375	L1	7	0	0
10/6/19	fa8c5b00	L1-5	7	382	L1	7	0	0
10/7/19	fa8c5b00	L1-5	7	369	L1	7	0	0
10/8/19	fa8c5b00	L1-5	7	375	L1	7	0	0
10/9/19	fa8c5b00	L1-5	7	380	L1	7	0	0
10/10/19	fa8c5b00	L1-5	7	366	L1	7	0	0
10/11/19	fa8c5b00	L1-5	7	368	L1	7	0	0
10/12/19	fa8c5b00	L1-5	6	370	L1	7	1	0
10/13/19	fa8c5b00	L1-5	7	368	L1	7	0	0
10/14/19	fa8c5b00	L1-5	7	370	L1	7	0	0
10/15/19	fa8c5b00	L1-5	7	351	L1	7	0	0
10/16/19	fa8c5b00	L1-5	7	375	L1	7	0	0
10/17/19	fa8c5b00	L1-5	7	393	L1	7	0	0
10/18/19	fa8c5b00	L1-5	7	382	L1	7	0	0
10/19/19	fa8c5b00	L1-5	7	276	L1	7	0	0
10/20/19	fa8c5b00	L1-5	7	128	L1	7	0	0
10/21/19	fa8c5b00	L1-5	7	12	L1	7	0	0
10/23/19	fa8c5b00	L1-5	2	182	L1	7	5	0
10/24/19	fa8c5b00	L1-5	7	153	L1	7	0	0
10/25/19	fa8c5b00	L1-5	7	71	L1	7	0	0
10/26/19	fa8c5b00	L1-5	7	89	L1	7	0	0
10/27/19	fa8c5b00	L1-5	7	75	L1	7	0	0
10/28/19	fa8c5b00	L1-5	7	77	L1	7	0	0
10/29/19	fa8c5b00	L1-5	7	118	L1	7	0	0
10/30/19	fa8c5b00	L1-5	7	386	L1	7	0	0
10/31/19	fa8c5b00	L1-5	7	368	L1	7	0	0
11/1/19	fa8c5b00	L1-5	7	373	L1	7	0	0
11/2/19	fa8c5b00	L1-5	7	336	L1	7	0	0
11/3/19	fa8c5b00	L1-5	6	270	L1	7	1	0
11/4/19	fa8c5b00	L1-5	7	70	L1	7	0	0
11/5/19	fa8c5b00	L1-5	5	56	L1	7	2	0
11/6/19	fa8c5b00	L1-5	6	54	L1	7	1	0
11/7/19	fa8c5b00	L1-5	7	57	L1	7	0	0
11/8/19	fa8c5b00	L1-5	7	32	L1	7	0	0
11/9/19	fa8c5b00	L1-5	7	21	L1	7	0	0
11/10/19	fa8c5b00	L1-5	7	7	L1	7	0	0
11/11/19	fa8c5b00	L1-5	7	43	L1	7	0	0
11/12/19	fa8c5b00	L1-5	7	61	L1	7	0	0
11/13/19	fa8c5b00	L1-5	7	22	L1	7	0	0
11/14/19	fa8c5b00	L1-5	7	21	L1	7	0	0
11/15/19	fa8c5b00	L1-5	7	52	L1	7	0	0
11/16/19	fa8c5b00	L1-5	7	43	L1	7	0	0
11/17/19	fa8c5b00	L1-5	6	68	L1	7	1	0
11/18/19	fa8c5b00	L1-5	6	42	L1	7	1	0
11/19/19	fa8c5b00	L1-5	5	39	L1	7	2	0
11/20/19	fa8c5b00	L1-5	7	62	L1	7	0	0
11/21/19	fa8c5b00	L1-5	7	83	L1	7	0	0
11/22/19	fa8c5b00	L1-5	7	42	L1	7	0	0
11/23/19	fa8c5b00	L1-5	7	41	L1	7	0	0
11/24/19	fa8c5b00	L1-5	6	46	L1	7	1	0
11/25/19	fa8c5b00	L1-5	7	48	L1	7	0	0
11/26/19	fa8c5b00	L1-5	7	38	L1	7	0	0
11/27/19	fa8c5b00	L1-5	7	53	L1	7	0	0
11/28/19	fa8c5b00	L1-5	7	44	L1	7	0	0
11/29/19	fa8c5b00	L1-5	7	34	L1	7	0	0
11/30/19	fa8c5b00	L1-5	7	30	L1	7	0	0
12/1/19	fa8c5b00	L1-5	7	7	L1	7	0	0
12/2/19	fa8c5b00	L1-5	7	15	L1	7	0	0
12/3/19	fa8c5b00	L1-5	7	11	L1	7	0	0
12/4/19	fa8c5b00	L1-5	7	19	L1	7	0	0
12/5/19	fa8c5b00	L1-5	7	21	L1	7	0	0
12/6/19	fa8c5b00	L1-5	7	17	L1	7	0	0
12/7/19	fa8c5b00	L1-5	7	19	L1	7	0	0
12/8/19	fa8c5b00	L1-5	7	15	L1	7	0	0
12/9/19	fa8c5b00	L1-5	7	12	L1	7	0	0
12/10/19	fa8c5b00	L1-5	7	15	L1	7	0	0
12/11/19	fa8c5b00	L1-5	7	10	L1	7	0	0
12/12/19	fa8c5b00	L1-5	7	6	L1	7	0	0
12/13/19	fa8c5b00	L1-5	7	5	L1	7	0	0
12/14/19	fa8c5b00	L1-5	7	-2	L1	7	0	0
12/15/19	fa8c5b00	L1-5	7	6	L1	7	0	0
12/16/19	fa8c5b00	L1-5	7	-1	L1	7	0	0
12/17/19	fa8c5b00	L1-5	3	5	L1	7	4	0
12/18/19	fa8c5b00	L1-5	7	17	L1	7	0	0
12/19/19	fa8c5b00	L1-5	7	27	L1	7	0	0
12/20/19	fa8c5b00	L1-5	7	31	L1	7	0	0
12/21/19	fa8c5b00	L1-5	7	31	L1	7	0	0
12/22/19	fa8c5b00	L1-5	7	26	L1	7	0	0
12/23/19	fa8c5b00	L1-5	7	23	L1	7	0	0
12/24/19	fa8c5b00	L1-5	7	13	L1	7	0	0
12/25/19	fa8c5b00	L1-5	7	5	L1	7	0	0
12/26/19	fa8c5b00	L1-5	7	4	L1	7	0	0
12/27/19	fa8c5b00	L1-5	6	6	L1	7	1	0
12/28/19	fa8c5b00	L1-5	7	6	L1	7	0	0
12/29/19	fa8c5b00	L1-5	7	6	L1	7	0	0
12/30/19	fa8c5b00	L1-5	7	-4	L1	7	0	0
12/31/19	fa8c5b00	L1-5	7	9	L1	7	0	0
1/1/20	fa8c5b00	L1-5	7	0	L1	7	0	0
1/2/20	fa8c5b00	L1-5	7	0	L1	7	0	0
1/3/20	fa8c5b00	L1-5	4	-4	L1	7	3	0
1/4/20	fa8c5b00	L1-5	7	-4	L1	7	0	0
1/5/20	fa8c5b00	L1-5	7	-2	L1	7	0	0
1/6/20	fa8c5b00	L1-5	7	-9	L1	7	0	0
1/7/20	fa8c5b00	L1-5	7	-4	L1	7	0	0
1/8/20	fa8c5b00	L1-5	7	-2	L1	7	0	0
1/9/20	fa8c5b00	L1-5	7	0	L1	7	0	0
1/10/20	fa8c5b00	L1-5	4	2	L1	7	3	0
1/13/20	fa8c5b00	L1-5	4	0	L1	7	3	0
1/14/20	fa8c5b00	L1-5	7	6	L1	7	0	0
1/15/20	fa8c5b00	L1-5	7	5	L1	7	0	0
1/16/20	fa8c5b00	L1-5	7	5	L1	7	0	0
1/17/20	fa8c5b00	L1-5	5	1	L1	7	2	0
1/18/20	fa8c5b00	L1-5	7	1	L1	7	0	0
1/19/20	fa8c5b00	L1-5	7	2	L1	7	0	0
1/20/20	fa8c5b00	L1-5	7	2	L1	7	0	0
1/21/20	fa8c5b00	L1-5	7	2	L1	7	0	0
1/22/20	fa8c5b00	L1-5	7	3	L1	7	0	0
1/23/20	fa8c5b00	L1-5	7	4	L1	7	0	0
1/24/20	fa8c5b00	L1-5	7	3	L1	7	0	0
1/25/20	fa8c5b00	L1-5	7	2	L1	7	0	0
1/26/20	fa8c5b00	L1-5	7	0	L1	7	0	0
1/27/20	fa8c5b00	L1-5	7	1	L1	7	0	0
1/28/20	fa8c5b00	L1-5	7	1	L1	7	0	0
1/29/20	fa8c5b00	L1-5	7	-1	L1	7	0	0
1/30/20	fa8c5b00	L1-5	7	0	L1	7	0	0
1/31/20	fa8c5b00	L1-5	6	0	L1	7	1	0
2/1/20	fa8c5b00	L1-5	7	1	L1	7	0	0
2/2/20	fa8c5b00	L1-5	7	0	L1	7	0	0
2/3/20	fa8c5b00	L1-5	7	1	L1	7	0	0
2/4/20	fa8c5b00	L1-5	7	2	L1	7	0	0
2/5/20	fa8c5b00	L1-5	7	3	L1	7	0	0
2/6/20	fa8c5b00	L1-5	7	3	L1	7	0	0
2/7/20	fa8c5b00	L1-5	7	-4	L1	7	0	0
2/8/20	fa8c5b00	L1-5	7	22	L1	7	0	0
2/9/20	fa8c5b00	L1-5	7	231	L1	7	0	0
2/10/20	fa8c5b00	L1-5	7	163	L1	7	0	0
2/11/20	fa8c5b00	L1-5	7	178	L1	7	0	0
2/12/20	fa8c5b00	L1-5	7	197	L1	7	0	0
2/13/20	fa8c5b00	L1-5	7	141	L1	7	0	0
2/14/20	fa8c5b00	L1-5	7	140	L1	7	0	0
2/15/20	fa8c5b00	L1-5	7	121	L1	7	0	0
2/16/20	fa8c5b00	L1-5	7	127	L1	7	0	0
2/17/20	fa8c5b00	L1-5	7	75	L1	7	0	0
2/18/20	fa8c5b00	L1-5	7	189	L1	7	0	0
2/19/20	fa8c5b00	L1-5	1	336	L1	7	6	0
2/20/20	fa8c5b00	L1-5	7	91	L1	7	0	0
2/21/20	fa8c5b00	L1-5	7	95	L1	7	0	0
2/22/20	fa8c5b00	L1-5	7	82	L1	7	0	0
2/23/20	fa8c5b00	L1-5	7	72	L1	7	0	0
2/24/20	fa8c5b00	L1-5	7	72	L1	7	0	0
2/25/20	fa8c5b00	L1-5	7	160	L1	7	0	0
2/26/20	fa8c5b00	L1-5	7	190	L1	7	0	0
2/27/20	fa8c5b00	L1-5	7	233	L1	7	0	0
2/28/20	fa8c5b00	L1-5	7	109	L1	7	0	0
2/29/20	fa8c5b00	L1-5	7	50	L1	7	0	0
3/1/20	fa8c5b00	L1-5	7	79	L1	7	0	0
3/2/20	fa8c5b00	L1-5	7	82	L1	7	0	0
3/3/20	fa8c5b00	L1-5	1	6	L1	7	6	0
3/4/20	fa8c5b00	L1-5	7	88	L1	7	0	0
3/5/20	fa8c5b00	L1-5	7	27	L1	7	0	0
3/6/20	fa8c5b00	L1-5	7	8	L1	7	0	0
3/7/20	fa8c5b00	L1-5	7	-1	L1	7	0	0
3/8/20	fa8c5b00	L1-5	7	-1	L1	7	0	0
3/9/20	fa8c5b00	L1-5	7	-3	L1	7	0	0
3/10/20	fa8c5b00	L1-5	7	-1	L1	7	0	0
3/11/20	fa8c5b00	L1-5	7	-5	L1	7	0	0
3/12/20	fa8c5b00	L1-5	7	-2	L1	7	0	0
3/13/20	fa8c5b00	L1-5	7	1	L1	7	0	0
3/14/20	fa8c5b00	L1-5	7	6	L1	7	0	0
3/15/20	fa8c5b00	L1-5	7	36	L1	7	0	0
3/16/20	fa8c5b00	L1-5	7	147	L1	7	0	0
3/17/20	fa8c5b00	L1-5	7	153	L1	7	0	0
3/18/20	fa8c5b00	L1-5	7	185	L1	7	0	0
3/19/20	fa8c5b00	L1-5	7	153	L1	7	0	0
3/20/20	fa8c5b00	L1-5	7	190	L1	7	0	0
3/21/20	fa8c5b00	L1-5	7	160	L1	7	0	0
3/22/20	fa8c5b00	L1-5	7	189	L1	7	0	0
3/23/20	fa8c5b00	L1-5	7	209	L1	7	0	0
3/24/20	fa8c5b00	L1-5	7	190	L1	7	0	0
3/25/20	fa8c5b00	L1-5	7	197	L1	7	0	0
3/26/20	fa8c5b00	L1-5	7	182	L1	7	0	0
3/27/20	fa8c5b00	L1-5	7	208	L1	7	0	0
3/28/20	fa8c5b00	L1-5	7	186	L1	7	0	0
3/29/20	fa8c5b00	L1-5	7	231	L1	7	0	0
3/30/20	fa8c5b00	L1-5	7	175	L1	7	0	0
3/31/20	fa8c5b00	L1-5	7	244	L1	7	0	0
4/1/20	fa8c5b00	L1-5	7	209	L1	7	0	0
4/2/20	fa8c5b00	L1-5	7	186	L1	7	0	0
4/3/20	fa8c5b00	L1-5	7	200	L1	7	0	0
4/4/20	fa8c5b00	L1-5	7	208	L1	7	0	0
4/5/20	fa8c5b00	L1-5	7	176	L1	7	0	0
4/6/20	fa8c5b00	L1-5	6	257	L1	7	1	0
4/7/20	fa8c5b00	L1-5	7	102	L1	7	0	0
4/8/20	fa8c5b00	L1-5	7	77	L1	7	0	0
4/9/20	fa8c5b00	L1-5	7	55	L1	7	0	0
4/10/20	fa8c5b00	L1-5	7	106	L1	7	0	0
4/11/20	fa8c5b00	L1-5	7	80	L1	7	0	0
4/12/20	fa8c5b00	L1-5	7	127	L1	7	0	0
4/13/20	fa8c5b00	L1-5	7	140	L1	7	0	0
4/14/20	fa8c5b00	L1-5	7	182	L1	7	0	0
4/15/20	fa8c5b00	L1-5	7	132	L1	7	0	0
4/16/20	fa8c5b00	L1-5	7	141	L1	7	0	0
4/17/20	fa8c5b00	L1-5	7	138	L1	7	0	0
4/18/20	fa8c5b00	L1-5	7	132	L1	7	0	0
4/19/20	fa8c5b00	L1-5	7	195	L1	7	0	0
4/20/20	fa8c5b00	L1-5	7	129	L1	7	0	0
4/21/20	fa8c5b00	L1-5	7	167	L1	7	0	0
4/22/20	fa8c5b00	L1-5	7	102	L1	7	0	0
4/23/20	fa8c5b00	L1-5	7	81	L1	7	0	0
8/31/19	5eac2c00	L1-6	3	600	L1	3	0	0
9/1/19	5eac2c00	L1-6	3	570	L1	3	0	0
9/2/19	5eac2c00	L1-6	3	559	L1	3	0	0
9/3/19	5eac2c00	L1-6	3	532	L1	3	0	0
9/4/19	5eac2c00	L1-6	3	550	L1	3	0	0
9/5/19	5eac2c00	L1-6	3	553	L1	3	0	0
9/6/19	5eac2c00	L1-6	3	521	L1	3	0	0
9/7/19	5eac2c00	L1-6	3	587	L1	3	0	0
9/8/19	5eac2c00	L1-6	3	535	L1	3	0	0
9/9/19	5eac2c00	L1-6	3	569	L1	3	0	0
9/10/19	5eac2c00	L1-6	3	537	L1	3	0	0
9/11/19	5eac2c00	L1-6	2	548	L1	3	1	0
9/12/19	5eac2c00	L1-6	3	567	L1	3	0	0
9/13/19	5eac2c00	L1-6	3	584	L1	3	0	0
9/14/19	5eac2c00	L1-6	3	549	L1	3	0	0
9/15/19	5eac2c00	L1-6	3	526	L1	3	0	0
9/16/19	5eac2c00	L1-6	3	537	L1	3	0	0
9/17/19	5eac2c00	L1-6	3	553	L1	3	0	0
9/18/19	5eac2c00	L1-6	3	559	L1	3	0	0
9/19/19	5eac2c00	L1-6	3	575	L1	3	0	0
9/20/19	5eac2c00	L1-6	3	577	L1	3	0	0
9/21/19	5eac2c00	L1-6	3	559	L1	3	0	0
9/22/19	5eac2c00	L1-6	3	583	L1	3	0	0
9/23/19	5eac2c00	L1-6	3	519	L1	3	0	0
9/24/19	5eac2c00	L1-6	3	543	L1	3	0	0
9/25/19	5eac2c00	L1-6	3	547	L1	3	0	0
9/26/19	5eac2c00	L1-6	3	572	L1	3	0	0
9/27/19	5eac2c00	L1-6	3	543	L1	3	0	0
9/30/19	5eac2c00	L1-6	3	534	L1	3	0	0
10/1/19	5eac2c00	L1-6	3	566	L1	3	0	0
10/2/19	5eac2c00	L1-6	3	558	L1	3	0	0
10/3/19	5eac2c00	L1-6	3	572	L1	3	0	0
10/4/19	5eac2c00	L1-6	3	569	L1	3	0	0
10/5/19	5eac2c00	L1-6	3	560	L1	3	0	0
10/6/19	5eac2c00	L1-6	3	580	L1	3	0	0
10/7/19	5eac2c00	L1-6	3	565	L1	3	0	0
10/8/19	5eac2c00	L1-6	3	537	L1	3	0	0
10/9/19	5eac2c00	L1-6	3	545	L1	3	0	0
10/10/19	5eac2c00	L1-6	3	572	L1	3	0	0
10/11/19	5eac2c00	L1-6	3	576	L1	3	0	0
10/12/19	5eac2c00	L1-6	3	497	L1	3	0	0
10/13/19	5eac2c00	L1-6	3	556	L1	3	0	0
10/14/19	5eac2c00	L1-6	3	562	L1	3	0	0
10/15/19	5eac2c00	L1-6	3	544	L1	3	0	0
10/16/19	5eac2c00	L1-6	3	403	L1	3	0	0
10/17/19	5eac2c00	L1-6	3	387	L1	3	0	0
10/18/19	5eac2c00	L1-6	3	547	L1	3	0	0
10/19/19	5eac2c00	L1-6	3	466	L1	3	0	0
10/20/19	5eac2c00	L1-6	3	431	L1	3	0	0
10/21/19	5eac2c00	L1-6	3	376	L1	3	0	0
10/24/19	5eac2c00	L1-6	3	405	L1	3	0	0
10/25/19	5eac2c00	L1-6	3	407	L1	3	0	0
10/26/19	5eac2c00	L1-6	3	464	L1	3	0	0
10/27/19	5eac2c00	L1-6	3	143	L1	3	0	0
10/28/19	5eac2c00	L1-6	3	287	L1	3	0	0
10/29/19	5eac2c00	L1-6	3	516	L1	3	0	0
10/30/19	5eac2c00	L1-6	3	529	L1	3	0	0
10/31/19	5eac2c00	L1-6	3	535	L1	3	0	0
11/1/19	5eac2c00	L1-6	3	527	L1	3	0	0
11/2/19	5eac2c00	L1-6	3	536	L1	3	0	0
11/3/19	5eac2c00	L1-6	3	558	L1	3	0	0
11/4/19	5eac2c00	L1-6	2	560	L1	3	1	0
11/5/19	5eac2c00	L1-6	3	549	L1	3	0	0
11/6/19	5eac2c00	L1-6	3	544	L1	3	0	0
11/7/19	5eac2c00	L1-6	3	553	L1	3	0	0
11/8/19	5eac2c00	L1-6	3	549	L1	3	0	0
11/9/19	5eac2c00	L1-6	3	521	L1	3	0	0
11/10/19	5eac2c00	L1-6	3	496	L1	3	0	0
11/11/19	5eac2c00	L1-6	3	492	L1	3	0	0
11/12/19	5eac2c00	L1-6	3	492	L1	3	0	0
11/13/19	5eac2c00	L1-6	3	515	L1	3	0	0
11/14/19	5eac2c00	L1-6	3	506	L1	3	0	0
11/15/19	5eac2c00	L1-6	3	473	L1	3	0	0
11/16/19	5eac2c00	L1-6	3	488	L1	3	0	0
11/17/19	5eac2c00	L1-6	3	494	L1	3	0	0
11/18/19	5eac2c00	L1-6	3	478	L1	3	0	0
11/19/19	5eac2c00	L1-6	3	507	L1	3	0	0
11/20/19	5eac2c00	L1-6	3	542	L1	3	0	0
11/21/19	5eac2c00	L1-6	3	555	L1	3	0	0
11/22/19	5eac2c00	L1-6	3	585	L1	3	0	0
11/23/19	5eac2c00	L1-6	3	568	L1	3	0	0
11/24/19	5eac2c00	L1-6	3	567	L1	3	0	0
11/25/19	5eac2c00	L1-6	3	562	L1	3	0	0
11/26/19	5eac2c00	L1-6	3	556	L1	3	0	0
11/27/19	5eac2c00	L1-6	3	563	L1	3	0	0
11/28/19	5eac2c00	L1-6	3	590	L1	3	0	0
11/29/19	5eac2c00	L1-6	3	581	L1	3	0	0
11/30/19	5eac2c00	L1-6	3	508	L1	3	0	0
12/1/19	5eac2c00	L1-6	3	552	L1	3	0	0
12/2/19	5eac2c00	L1-6	3	547	L1	3	0	0
12/3/19	5eac2c00	L1-6	3	539	L1	3	0	0
12/4/19	5eac2c00	L1-6	3	530	L1	3	0	0
12/5/19	5eac2c00	L1-6	3	554	L1	3	0	0
12/6/19	5eac2c00	L1-6	3	529	L1	3	0	0
12/7/19	5eac2c00	L1-6	3	539	L1	3	0	0
12/8/19	5eac2c00	L1-6	3	517	L1	3	0	0
12/9/19	5eac2c00	L1-6	3	552	L1	3	0	0
12/10/19	5eac2c00	L1-6	3	535	L1	3	0	0
12/11/19	5eac2c00	L1-6	3	527	L1	3	0	0
12/12/19	5eac2c00	L1-6	3	532	L1	3	0	0
12/13/19	5eac2c00	L1-6	3	512	L1	3	0	0
12/14/19	5eac2c00	L1-6	3	412	L1	3	0	0
12/15/19	5eac2c00	L1-6	3	524	L1	3	0	0
12/16/19	5eac2c00	L1-6	3	540	L1	3	0	0
12/17/19	5eac2c00	L1-6	3	514	L1	3	0	0
12/18/19	5eac2c00	L1-6	3	528	L1	3	0	0
12/19/19	5eac2c00	L1-6	3	554	L1	3	0	0
12/20/19	5eac2c00	L1-6	3	530	L1	3	0	0
12/21/19	5eac2c00	L1-6	3	537	L1	3	0	0
12/22/19	5eac2c00	L1-6	3	557	L1	3	0	0
12/23/19	5eac2c00	L1-6	3	558	L1	3	0	0
12/24/19	5eac2c00	L1-6	3	506	L1	3	0	0
12/25/19	5eac2c00	L1-6	3	529	L1	3	0	0
12/26/19	5eac2c00	L1-6	3	539	L1	3	0	0
12/27/19	5eac2c00	L1-6	3	535	L1	3	0	0
12/28/19	5eac2c00	L1-6	3	543	L1	3	0	0
12/29/19	5eac2c00	L1-6	3	527	L1	3	0	0
12/30/19	5eac2c00	L1-6	3	538	L1	3	0	0
12/31/19	5eac2c00	L1-6	3	510	L1	3	0	0
1/1/20	5eac2c00	L1-6	3	555	L1	3	0	0
1/2/20	5eac2c00	L1-6	3	547	L1	3	0	0
1/3/20	5eac2c00	L1-6	3	547	L1	3	0	0
1/4/20	5eac2c00	L1-6	3	534	L1	3	0	0
1/5/20	5eac2c00	L1-6	3	480	L1	3	0	0
1/6/20	5eac2c00	L1-6	3	535	L1	3	0	0
1/7/20	5eac2c00	L1-6	3	546	L1	3	0	0
1/8/20	5eac2c00	L1-6	3	559	L1	3	0	0
1/9/20	5eac2c00	L1-6	3	533	L1	3	0	0
1/10/20	5eac2c00	L1-6	3	500	L1	3	0	0
1/14/20	5eac2c00	L1-6	3	517	L1	3	0	0
1/15/20	5eac2c00	L1-6	3	468	L1	3	0	0
1/16/20	5eac2c00	L1-6	3	435	L1	3	0	0
1/17/20	5eac2c00	L1-6	3	447	L1	3	0	0
8/30/19	7f8e5b00	L1-7	1	504	L1	7	6	0
8/31/19	7f8e5b00	L1-7	7	503	L1	7	0	0
9/1/19	7f8e5b00	L1-7	7	494	L1	7	0	0
9/2/19	7f8e5b00	L1-7	7	512	L1	7	0	0
9/3/19	7f8e5b00	L1-7	7	501	L1	7	0	0
9/4/19	7f8e5b00	L1-7	6	523	L1	7	1	0
9/5/19	7f8e5b00	L1-7	7	500	L1	7	0	0
9/6/19	7f8e5b00	L1-7	7	498	L1	7	0	0
9/7/19	7f8e5b00	L1-7	7	492	L1	7	0	0
9/8/19	7f8e5b00	L1-7	7	504	L1	7	0	0
9/9/19	7f8e5b00	L1-7	7	513	L1	7	0	0
9/10/19	7f8e5b00	L1-7	7	514	L1	7	0	0
9/11/19	7f8e5b00	L1-7	7	522	L1	7	0	0
9/12/19	7f8e5b00	L1-7	7	514	L1	7	0	0
9/13/19	7f8e5b00	L1-7	7	501	L1	7	0	0
9/14/19	7f8e5b00	L1-7	7	514	L1	7	0	0
9/15/19	7f8e5b00	L1-7	7	509	L1	7	0	0
9/16/19	7f8e5b00	L1-7	7	510	L1	7	0	0
9/17/19	7f8e5b00	L1-7	7	514	L1	7	0	0
9/18/19	7f8e5b00	L1-7	7	513	L1	7	0	0
9/19/19	7f8e5b00	L1-7	7	505	L1	7	0	0
9/20/19	7f8e5b00	L1-7	7	503	L1	7	0	0
9/21/19	7f8e5b00	L1-7	7	502	L1	7	0	0
9/22/19	7f8e5b00	L1-7	7	488	L1	7	0	0
9/23/19	7f8e5b00	L1-7	7	499	L1	7	0	0
9/24/19	7f8e5b00	L1-7	7	466	L1	7	0	0
9/25/19	7f8e5b00	L1-7	7	483	L1	7	0	0
9/26/19	7f8e5b00	L1-7	7	474	L1	7	0	0
9/27/19	7f8e5b00	L1-7	7	488	L1	7	0	0
9/29/19	7f8e5b00	L1-7	3	370	L1	7	4	0
9/30/19	7f8e5b00	L1-7	7	476	L1	7	0	0
10/1/19	7f8e5b00	L1-7	7	501	L1	7	0	0
10/2/19	7f8e5b00	L1-7	7	506	L1	7	0	0
10/3/19	7f8e5b00	L1-7	7	473	L1	7	0	0
10/4/19	7f8e5b00	L1-7	7	513	L1	7	0	0
10/5/19	7f8e5b00	L1-7	7	515	L1	7	0	0
10/6/19	7f8e5b00	L1-7	7	524	L1	7	0	0
10/7/19	7f8e5b00	L1-7	7	493	L1	7	0	0
10/8/19	7f8e5b00	L1-7	7	509	L1	7	0	0
10/9/19	7f8e5b00	L1-7	7	499	L1	7	0	0
10/10/19	7f8e5b00	L1-7	7	501	L1	7	0	0
10/11/19	7f8e5b00	L1-7	7	520	L1	7	0	0
10/12/19	7f8e5b00	L1-7	7	512	L1	7	0	0
10/13/19	7f8e5b00	L1-7	7	497	L1	7	0	0
10/14/19	7f8e5b00	L1-7	7	522	L1	7	0	0
10/15/19	7f8e5b00	L1-7	7	531	L1	7	0	0
10/16/19	7f8e5b00	L1-7	7	528	L1	7	0	0
10/17/19	7f8e5b00	L1-7	7	507	L1	7	0	0
10/18/19	7f8e5b00	L1-7	7	517	L1	7	0	0
10/19/19	7f8e5b00	L1-7	7	485	L1	7	0	0
10/20/19	7f8e5b00	L1-7	7	429	L1	7	0	0
10/21/19	7f8e5b00	L1-7	7	488	L1	7	0	0
10/23/19	7f8e5b00	L1-7	2	539	L1	7	5	0
10/24/19	7f8e5b00	L1-7	7	520	L1	7	0	0
10/25/19	7f8e5b00	L1-7	7	519	L1	7	0	0
10/26/19	7f8e5b00	L1-7	7	520	L1	7	0	0
10/27/19	7f8e5b00	L1-7	7	523	L1	7	0	0
10/28/19	7f8e5b00	L1-7	7	522	L1	7	0	0
10/29/19	7f8e5b00	L1-7	7	515	L1	7	0	0
10/30/19	7f8e5b00	L1-7	7	517	L1	7	0	0
10/31/19	7f8e5b00	L1-7	7	514	L1	7	0	0
11/1/19	7f8e5b00	L1-7	7	515	L1	7	0	0
11/2/19	7f8e5b00	L1-7	7	518	L1	7	0	0
11/3/19	7f8e5b00	L1-7	7	497	L1	7	0	0
11/4/19	7f8e5b00	L1-7	6	296	L1	7	1	0
11/5/19	7f8e5b00	L1-7	5	493	L1	7	2	0
11/6/19	7f8e5b00	L1-7	6	393	L1	7	1	0
11/7/19	7f8e5b00	L1-7	7	468	L1	7	0	0
11/8/19	7f8e5b00	L1-7	7	472	L1	7	0	0
11/9/19	7f8e5b00	L1-7	7	461	L1	7	0	0
11/10/19	7f8e5b00	L1-7	7	462	L1	7	0	0
11/11/19	7f8e5b00	L1-7	7	475	L1	7	0	0
11/12/19	7f8e5b00	L1-7	7	454	L1	7	0	0
11/13/19	7f8e5b00	L1-7	7	486	L1	7	0	0
11/14/19	7f8e5b00	L1-7	7	459	L1	7	0	0
11/15/19	7f8e5b00	L1-7	7	473	L1	7	0	0
11/16/19	7f8e5b00	L1-7	7	451	L1	7	0	0
11/17/19	7f8e5b00	L1-7	7	470	L1	7	0	0
11/18/19	7f8e5b00	L1-7	7	473	L1	7	0	0
11/19/19	7f8e5b00	L1-7	3	456	L1	7	4	0
11/21/19	7f8e5b00	L1-7	3	478	L1	7	4	0
11/22/19	7f8e5b00	L1-7	7	454	L1	7	0	0
11/23/19	7f8e5b00	L1-7	7	458	L1	7	0	0
11/24/19	7f8e5b00	L1-7	7	408	L1	7	0	0
11/25/19	7f8e5b00	L1-7	7	472	L1	7	0	0
11/26/19	7f8e5b00	L1-7	7	437	L1	7	0	0
11/27/19	7f8e5b00	L1-7	7	457	L1	7	0	0
11/28/19	7f8e5b00	L1-7	7	450	L1	7	0	0
11/29/19	7f8e5b00	L1-7	7	460	L1	7	0	0
11/30/19	7f8e5b00	L1-7	7	460	L1	7	0	0
12/1/19	7f8e5b00	L1-7	7	436	L1	7	0	0
12/2/19	7f8e5b00	L1-7	7	424	L1	7	0	0
12/3/19	7f8e5b00	L1-7	7	437	L1	7	0	0
12/4/19	7f8e5b00	L1-7	7	444	L1	7	0	0
12/5/19	7f8e5b00	L1-7	7	438	L1	7	0	0
12/6/19	7f8e5b00	L1-7	7	439	L1	7	0	0
12/7/19	7f8e5b00	L1-7	7	417	L1	7	0	0
12/8/19	7f8e5b00	L1-7	7	430	L1	7	0	0
12/9/19	7f8e5b00	L1-7	7	399	L1	7	0	0
12/10/19	7f8e5b00	L1-7	7	424	L1	7	0	0
12/11/19	7f8e5b00	L1-7	7	427	L1	7	0	0
12/12/19	7f8e5b00	L1-7	7	420	L1	7	0	0
12/13/19	7f8e5b00	L1-7	7	430	L1	7	0	0
12/14/19	7f8e5b00	L1-7	7	426	L1	7	0	0
12/15/19	7f8e5b00	L1-7	7	419	L1	7	0	0
12/16/19	7f8e5b00	L1-7	7	422	L1	7	0	0
12/17/19	7f8e5b00	L1-7	3	434	L1	7	4	0
12/18/19	7f8e5b00	L1-7	7	445	L1	7	0	0
12/19/19	7f8e5b00	L1-7	7	420	L1	7	0	0
12/20/19	7f8e5b00	L1-7	7	440	L1	7	0	0
12/21/19	7f8e5b00	L1-7	7	437	L1	7	0	0
12/22/19	7f8e5b00	L1-7	7	423	L1	7	0	0
12/23/19	7f8e5b00	L1-7	7	438	L1	7	0	0
12/24/19	7f8e5b00	L1-7	7	425	L1	7	0	0
12/25/19	7f8e5b00	L1-7	7	439	L1	7	0	0
12/26/19	7f8e5b00	L1-7	7	433	L1	7	0	0
12/27/19	7f8e5b00	L1-7	6	424	L1	7	1	0
12/28/19	7f8e5b00	L1-7	7	441	L1	7	0	0
12/29/19	7f8e5b00	L1-7	7	438	L1	7	0	0
12/30/19	7f8e5b00	L1-7	7	426	L1	7	0	0
12/31/19	7f8e5b00	L1-7	7	427	L1	7	0	0
1/1/20	7f8e5b00	L1-7	7	423	L1	7	0	0
1/2/20	7f8e5b00	L1-7	7	432	L1	7	0	0
1/3/20	7f8e5b00	L1-7	4	440	L1	7	3	0
1/4/20	7f8e5b00	L1-7	7	417	L1	7	0	0
1/5/20	7f8e5b00	L1-7	2	408	L1	7	5	0
1/6/20	7f8e5b00	L1-7	5	422	L1	7	2	0
1/7/20	7f8e5b00	L1-7	7	424	L1	7	0	0
1/8/20	7f8e5b00	L1-7	7	421	L1	7	0	0
1/9/20	7f8e5b00	L1-7	7	404	L1	7	0	0
1/10/20	7f8e5b00	L1-7	4	419	L1	7	3	0
1/13/20	7f8e5b00	L1-7	4	408	L1	7	3	0
1/14/20	7f8e5b00	L1-7	7	385	L1	7	0	0
1/15/20	7f8e5b00	L1-7	7	404	L1	7	0	0
1/16/20	7f8e5b00	L1-7	7	395	L1	7	0	0
1/17/20	7f8e5b00	L1-7	3	403	L1	7	4	0
8/30/19	58d65d00	L1-8	1	643	L1	7	6	0
8/31/19	58d65d00	L1-8	7	501	L1	7	0	0
9/1/19	58d65d00	L1-8	7	565	L1	7	0	0
9/2/19	58d65d00	L1-8	7	537	L1	7	0	0
9/3/19	58d65d00	L1-8	7	531	L1	7	0	0
9/4/19	58d65d00	L1-8	7	538	L1	7	0	0
9/5/19	58d65d00	L1-8	7	547	L1	7	0	0
9/6/19	58d65d00	L1-8	7	549	L1	7	0	0
9/7/19	58d65d00	L1-8	7	554	L1	7	0	0
9/8/19	58d65d00	L1-8	7	522	L1	7	0	0
9/9/19	58d65d00	L1-8	7	538	L1	7	0	0
9/10/19	58d65d00	L1-8	7	517	L1	7	0	0
9/11/19	58d65d00	L1-8	7	438	L1	7	0	0
9/12/19	58d65d00	L1-8	6	343	L1	7	1	0
9/13/19	58d65d00	L1-8	7	304	L1	7	0	0
9/14/19	58d65d00	L1-8	7	303	L1	7	0	0
9/15/19	58d65d00	L1-8	7	285	L1	7	0	0
9/16/19	58d65d00	L1-8	7	281	L1	7	0	0
9/17/19	58d65d00	L1-8	7	395	L1	7	0	0
9/18/19	58d65d00	L1-8	7	575	L1	7	0	0
9/19/19	58d65d00	L1-8	6	541	L1	7	1	0
9/20/19	58d65d00	L1-8	7	487	L1	7	0	0
9/21/19	58d65d00	L1-8	7	396	L1	7	0	0
9/22/19	58d65d00	L1-8	7	438	L1	7	0	0
9/23/19	58d65d00	L1-8	7	393	L1	7	0	0
9/24/19	58d65d00	L1-8	7	397	L1	7	0	0
9/25/19	58d65d00	L1-8	7	487	L1	7	0	0
9/26/19	58d65d00	L1-8	7	555	L1	7	0	0
9/27/19	58d65d00	L1-8	7	488	L1	7	0	0
9/29/19	58d65d00	L1-8	3	545	L1	7	4	0
9/30/19	58d65d00	L1-8	7	555	L1	7	0	0
10/1/19	58d65d00	L1-8	7	556	L1	7	0	0
10/2/19	58d65d00	L1-8	7	550	L1	7	0	0
10/3/19	58d65d00	L1-8	7	552	L1	7	0	0
10/4/19	58d65d00	L1-8	7	537	L1	7	0	0
10/5/19	58d65d00	L1-8	7	555	L1	7	0	0
10/6/19	58d65d00	L1-8	7	558	L1	7	0	0
10/7/19	58d65d00	L1-8	7	565	L1	7	0	0
10/8/19	58d65d00	L1-8	7	528	L1	7	0	0
10/9/19	58d65d00	L1-8	7	543	L1	7	0	0
10/10/19	58d65d00	L1-8	7	540	L1	7	0	0
10/11/19	58d65d00	L1-8	7	554	L1	7	0	0
10/12/19	58d65d00	L1-8	7	548	L1	7	0	0
10/13/19	58d65d00	L1-8	7	564	L1	7	0	0
10/14/19	58d65d00	L1-8	7	535	L1	7	0	0
10/15/19	58d65d00	L1-8	7	524	L1	7	0	0
10/16/19	58d65d00	L1-8	7	523	L1	7	0	0
10/17/19	58d65d00	L1-8	7	512	L1	7	0	0
10/18/19	58d65d00	L1-8	7	518	L1	7	0	0
10/19/19	58d65d00	L1-8	7	520	L1	7	0	0
10/20/19	58d65d00	L1-8	7	127	L1	7	0	0
10/21/19	58d65d00	L1-8	7	89	L1	7	0	0
10/23/19	58d65d00	L1-8	2	600	L1	7	5	0
10/24/19	58d65d00	L1-8	7	595	L1	7	0	0
10/25/19	58d65d00	L1-8	7	577	L1	7	0	0
10/26/19	58d65d00	L1-8	7	579	L1	7	0	0
10/27/19	58d65d00	L1-8	7	577	L1	7	0	0
10/28/19	58d65d00	L1-8	7	591	L1	7	0	0
10/29/19	58d65d00	L1-8	7	592	L1	7	0	0
10/30/19	58d65d00	L1-8	7	577	L1	7	0	0
10/31/19	58d65d00	L1-8	7	554	L1	7	0	0
11/1/19	58d65d00	L1-8	7	546	L1	7	0	0
11/2/19	58d65d00	L1-8	7	563	L1	7	0	0
11/3/19	58d65d00	L1-8	7	540	L1	7	0	0
11/4/19	58d65d00	L1-8	7	560	L1	7	0	0
11/5/19	58d65d00	L1-8	4	558	L1	7	3	0
11/11/19	58d65d00	L1-8	2	570	L1	7	5	0
11/12/19	58d65d00	L1-8	7	564	L1	7	0	0
11/13/19	58d65d00	L1-8	7	550	L1	7	0	0
11/14/19	58d65d00	L1-8	7	554	L1	7	0	0
11/15/19	58d65d00	L1-8	7	535	L1	7	0	0
11/16/19	58d65d00	L1-8	7	541	L1	7	0	0
11/17/19	58d65d00	L1-8	7	533	L1	7	0	0
11/18/19	58d65d00	L1-8	1	551	L1	7	6	0
11/21/19	58d65d00	L1-8	3	567	L1	7	4	0
11/22/19	58d65d00	L1-8	7	515	L1	7	0	0
11/23/19	58d65d00	L1-8	7	522	L1	7	0	0
11/24/19	58d65d00	L1-8	7	523	L1	7	0	0
11/25/19	58d65d00	L1-8	7	495	L1	7	0	0
11/26/19	58d65d00	L1-8	7	488	L1	7	0	0
11/27/19	58d65d00	L1-8	7	504	L1	7	0	0
11/28/19	58d65d00	L1-8	7	503	L1	7	0	0
11/29/19	58d65d00	L1-8	7	498	L1	7	0	0
11/30/19	58d65d00	L1-8	6	490	L1	7	1	0
12/1/19	58d65d00	L1-8	7	485	L1	7	0	0
12/2/19	58d65d00	L1-8	7	476	L1	7	0	0
12/3/19	58d65d00	L1-8	6	464	L1	7	1	0
12/4/19	58d65d00	L1-8	7	498	L1	7	0	0
12/5/19	58d65d00	L1-8	7	488	L1	7	0	0
12/6/19	58d65d00	L1-8	7	479	L1	7	0	0
12/7/19	58d65d00	L1-8	7	505	L1	7	0	0
12/8/19	58d65d00	L1-8	7	463	L1	7	0	0
12/9/19	58d65d00	L1-8	7	484	L1	7	0	0
12/10/19	58d65d00	L1-8	7	485	L1	7	0	0
12/11/19	58d65d00	L1-8	7	472	L1	7	0	0
12/12/19	58d65d00	L1-8	7	461	L1	7	0	0
12/13/19	58d65d00	L1-8	7	477	L1	7	0	0
12/14/19	58d65d00	L1-8	7	476	L1	7	0	0
12/15/19	58d65d00	L1-8	7	475	L1	7	0	0
12/16/19	58d65d00	L1-8	7	465	L1	7	0	0
12/17/19	58d65d00	L1-8	3	476	L1	7	4	0
12/18/19	58d65d00	L1-8	7	478	L1	7	0	0
12/19/19	58d65d00	L1-8	7	495	L1	7	0	0
12/20/19	58d65d00	L1-8	7	491	L1	7	0	0
12/21/19	58d65d00	L1-8	7	500	L1	7	0	0
12/22/19	58d65d00	L1-8	7	477	L1	7	0	0
12/23/19	58d65d00	L1-8	7	497	L1	7	0	0
12/24/19	58d65d00	L1-8	7	495	L1	7	0	0
12/25/19	58d65d00	L1-8	7	468	L1	7	0	0
12/26/19	58d65d00	L1-8	7	474	L1	7	0	0
12/27/19	58d65d00	L1-8	6	461	L1	7	1	0
12/28/19	58d65d00	L1-8	7	463	L1	7	0	0
12/29/19	58d65d00	L1-8	7	464	L1	7	0	0
12/30/19	58d65d00	L1-8	7	420	L1	7	0	0
12/31/19	58d65d00	L1-8	7	420	L1	7	0	0
1/1/20	58d65d00	L1-8	6	403	L1	7	1	0
1/2/20	58d65d00	L1-8	7	391	L1	7	0	0
1/3/20	58d65d00	L1-8	4	375	L1	7	3	0
1/4/20	58d65d00	L1-8	7	378	L1	7	0	0
1/5/20	58d65d00	L1-8	6	466	L1	7	1	0
1/6/20	58d65d00	L1-8	7	483	L1	7	0	0
1/7/20	58d65d00	L1-8	7	459	L1	7	0	0
1/8/20	58d65d00	L1-8	7	445	L1	7	0	0
1/9/20	58d65d00	L1-8	7	447	L1	7	0	0
1/10/20	58d65d00	L1-8	4	442	L1	7	3	0
1/13/20	58d65d00	L1-8	4	423	L1	7	3	0
1/14/20	58d65d00	L1-8	7	436	L1	7	0	0
1/15/20	58d65d00	L1-8	7	450	L1	7	0	0
1/16/20	58d65d00	L1-8	7	457	L1	7	0	0
1/17/20	58d65d00	L1-8	3	442	L1	7	4	0
8/31/19	c156c700	L1-9	3	569	L1	3	0	0
9/1/19	c156c700	L1-9	3	564	L1	3	0	0
9/2/19	c156c700	L1-9	3	504	L1	3	0	0
9/3/19	c156c700	L1-9	3	529	L1	3	0	0
9/4/19	c156c700	L1-9	3	568	L1	3	0	0
9/5/19	c156c700	L1-9	3	545	L1	3	0	0
9/6/19	c156c700	L1-9	3	516	L1	3	0	0
9/7/19	c156c700	L1-9	3	522	L1	3	0	0
9/8/19	c156c700	L1-9	3	379	L1	3	0	0
9/9/19	c156c700	L1-9	3	527	L1	3	0	0
9/10/19	c156c700	L1-9	3	559	L1	3	0	0
9/11/19	c156c700	L1-9	3	555	L1	3	0	0
9/12/19	c156c700	L1-9	3	565	L1	3	0	0
9/13/19	c156c700	L1-9	3	586	L1	3	0	0
9/14/19	c156c700	L1-9	3	584	L1	3	0	0
9/15/19	c156c700	L1-9	3	581	L1	3	0	0
9/16/19	c156c700	L1-9	3	524	L1	3	0	0
9/17/19	c156c700	L1-9	3	566	L1	3	0	0
9/18/19	c156c700	L1-9	3	552	L1	3	0	0
9/19/19	c156c700	L1-9	3	549	L1	3	0	0
9/20/19	c156c700	L1-9	3	590	L1	3	0	0
9/21/19	c156c700	L1-9	3	558	L1	3	0	0
9/22/19	c156c700	L1-9	3	596	L1	3	0	0
9/23/19	c156c700	L1-9	3	580	L1	3	0	0
9/24/19	c156c700	L1-9	3	566	L1	3	0	0
9/25/19	c156c700	L1-9	3	595	L1	3	0	0
9/26/19	c156c700	L1-9	3	596	L1	3	0	0
9/27/19	c156c700	L1-9	3	548	L1	3	0	0
9/30/19	c156c700	L1-9	3	565	L1	3	0	0
10/1/19	c156c700	L1-9	3	622	L1	3	0	0
10/2/19	c156c700	L1-9	3	567	L1	3	0	0
10/3/19	c156c700	L1-9	3	591	L1	3	0	0
10/4/19	c156c700	L1-9	3	541	L1	3	0	0
10/5/19	c156c700	L1-9	3	601	L1	3	0	0
10/6/19	c156c700	L1-9	3	613	L1	3	0	0
10/7/19	c156c700	L1-9	3	574	L1	3	0	0
10/8/19	c156c700	L1-9	3	416	L1	3	0	0
10/9/19	c156c700	L1-9	3	408	L1	3	0	0
10/10/19	c156c700	L1-9	3	421	L1	3	0	0
10/11/19	c156c700	L1-9	3	445	L1	3	0	0
10/12/19	c156c700	L1-9	3	465	L1	3	0	0
10/13/19	c156c700	L1-9	3	487	L1	3	0	0
10/14/19	c156c700	L1-9	3	501	L1	3	0	0
10/15/19	c156c700	L1-9	3	485	L1	3	0	0
10/16/19	c156c700	L1-9	3	490	L1	3	0	0
10/17/19	c156c700	L1-9	3	475	L1	3	0	0
10/18/19	c156c700	L1-9	3	523	L1	3	0	0
10/19/19	c156c700	L1-9	3	526	L1	3	0	0
10/20/19	c156c700	L1-9	3	487	L1	3	0	0
10/21/19	c156c700	L1-9	3	507	L1	3	0	0
10/24/19	c156c700	L1-9	3	613	L1	3	0	0
10/25/19	c156c700	L1-9	3	570	L1	3	0	0
10/26/19	c156c700	L1-9	3	592	L1	3	0	0
10/27/19	c156c700	L1-9	3	560	L1	3	0	0
10/28/19	c156c700	L1-9	3	493	L1	3	0	0
10/29/19	c156c700	L1-9	3	604	L1	3	0	0
10/30/19	c156c700	L1-9	3	584	L1	3	0	0
10/31/19	c156c700	L1-9	3	556	L1	3	0	0
11/1/19	c156c700	L1-9	3	497	L1	3	0	0
11/2/19	c156c700	L1-9	3	534	L1	3	0	0
11/3/19	c156c700	L1-9	3	489	L1	3	0	0
11/4/19	c156c700	L1-9	3	547	L1	3	0	0
11/12/19	c156c700	L1-9	3	617	L1	3	0	0
11/13/19	c156c700	L1-9	3	557	L1	3	0	0
11/14/19	c156c700	L1-9	3	564	L1	3	0	0
11/15/19	c156c700	L1-9	3	581	L1	3	0	0
11/16/19	c156c700	L1-9	3	530	L1	3	0	0
11/17/19	c156c700	L1-9	3	586	L1	3	0	0
11/18/19	c156c700	L1-9	3	613	L1	3	0	0
11/19/19	c156c700	L1-9	3	591	L1	3	0	0
11/20/19	c156c700	L1-9	3	577	L1	3	0	0
11/21/19	c156c700	L1-9	3	574	L1	3	0	0
11/22/19	c156c700	L1-9	3	547	L1	3	0	0
11/23/19	c156c700	L1-9	3	509	L1	3	0	0
11/24/19	c156c700	L1-9	3	567	L1	3	0	0
11/25/19	c156c700	L1-9	3	562	L1	3	0	0
11/26/19	c156c700	L1-9	3	523	L1	3	0	0
11/27/19	c156c700	L1-9	3	557	L1	3	0	0
11/28/19	c156c700	L1-9	3	554	L1	3	0	0
11/29/19	c156c700	L1-9	3	566	L1	3	0	0
11/30/19	c156c700	L1-9	3	558	L1	3	0	0
12/1/19	c156c700	L1-9	3	540	L1	3	0	0
12/2/19	c156c700	L1-9	3	485	L1	3	0	0
12/3/19	c156c700	L1-9	3	510	L1	3	0	0
12/4/19	c156c700	L1-9	3	525	L1	3	0	0
12/5/19	c156c700	L1-9	3	560	L1	3	0	0
12/6/19	c156c700	L1-9	3	561	L1	3	0	0
12/7/19	c156c700	L1-9	3	542	L1	3	0	0
12/8/19	c156c700	L1-9	3	578	L1	3	0	0
12/9/19	c156c700	L1-9	3	575	L1	3	0	0
12/10/19	c156c700	L1-9	3	576	L1	3	0	0
12/11/19	c156c700	L1-9	3	530	L1	3	0	0
12/12/19	c156c700	L1-9	3	568	L1	3	0	0
12/13/19	c156c700	L1-9	3	573	L1	3	0	0
12/14/19	c156c700	L1-9	3	561	L1	3	0	0
12/15/19	c156c700	L1-9	3	582	L1	3	0	0
12/16/19	c156c700	L1-9	3	564	L1	3	0	0
12/17/19	c156c700	L1-9	3	551	L1	3	0	0
12/18/19	c156c700	L1-9	3	517	L1	3	0	0
12/19/19	c156c700	L1-9	3	463	L1	3	0	0
12/20/19	c156c700	L1-9	3	510	L1	3	0	0
12/21/19	c156c700	L1-9	3	530	L1	3	0	0
12/22/19	c156c700	L1-9	3	571	L1	3	0	0
12/23/19	c156c700	L1-9	3	586	L1	3	0	0
12/24/19	c156c700	L1-9	3	586	L1	3	0	0
12/25/19	c156c700	L1-9	3	593	L1	3	0	0
12/26/19	c156c700	L1-9	3	548	L1	3	0	0
12/27/19	c156c700	L1-9	3	575	L1	3	0	0
12/28/19	c156c700	L1-9	3	567	L1	3	0	0
12/29/19	c156c700	L1-9	3	603	L1	3	0	0
12/30/19	c156c700	L1-9	3	557	L1	3	0	0
12/31/19	c156c700	L1-9	3	548	L1	3	0	0
1/1/20	c156c700	L1-9	3	584	L1	3	0	0
1/2/20	c156c700	L1-9	3	488	L1	3	0	0
1/3/20	c156c700	L1-9	3	565	L1	3	0	0
1/4/20	c156c700	L1-9	3	511	L1	3	0	0
1/5/20	c156c700	L1-9	3	565	L1	3	0	0
1/6/20	c156c700	L1-9	3	542	L1	3	0	0
1/7/20	c156c700	L1-9	3	580	L1	3	0	0
1/8/20	c156c700	L1-9	3	600	L1	3	0	0
1/9/20	c156c700	L1-9	3	576	L1	3	0	0
1/10/20	c156c700	L1-9	3	512	L1	3	0	0
1/14/20	c156c700	L1-9	3	512	L1	3	0	0
1/15/20	c156c700	L1-9	3	555	L1	3	0	0
1/16/20	c156c700	L1-9	3	523	L1	3	0	0
1/17/20	c156c700	L1-9	3	507	L1	3	0	0
1/19/20	c156c700	L1-9	3	0	L1	3	0	0
1/20/20	c156c700	L1-9	3	0	L1	3	0	0
1/21/20	c156c700	L1-9	3	0	L1	3	0	0
1/23/20	c156c700	L1-9	2	0	L1	3	1	0
8/30/19	8a8d5b00	L1-10	5	598	L1	7	2	0
8/31/19	8a8d5b00	L1-10	7	570	L1	7	0	0
9/1/19	8a8d5b00	L1-10	7	617	L1	7	0	0
9/2/19	8a8d5b00	L1-10	7	587	L1	7	0	0
9/3/19	8a8d5b00	L1-10	7	615	L1	7	0	0
9/4/19	8a8d5b00	L1-10	7	630	L1	7	0	0
9/5/19	8a8d5b00	L1-10	7	652	L1	7	0	0
9/6/19	8a8d5b00	L1-10	7	640	L1	7	0	0
9/7/19	8a8d5b00	L1-10	7	633	L1	7	0	0
9/8/19	8a8d5b00	L1-10	7	608	L1	7	0	0
9/9/19	8a8d5b00	L1-10	7	641	L1	7	0	0
9/10/19	8a8d5b00	L1-10	7	631	L1	7	0	0
9/11/19	8a8d5b00	L1-10	7	633	L1	7	0	0
9/12/19	8a8d5b00	L1-10	7	632	L1	7	0	0
9/13/19	8a8d5b00	L1-10	7	658	L1	7	0	0
9/14/19	8a8d5b00	L1-10	7	644	L1	7	0	0
9/15/19	8a8d5b00	L1-10	7	593	L1	7	0	0
9/16/19	8a8d5b00	L1-10	7	601	L1	7	0	0
9/17/19	8a8d5b00	L1-10	7	637	L1	7	0	0
9/18/19	8a8d5b00	L1-10	7	588	L1	7	0	0
9/19/19	8a8d5b00	L1-10	7	578	L1	7	0	0
9/20/19	8a8d5b00	L1-10	7	612	L1	7	0	0
9/21/19	8a8d5b00	L1-10	7	622	L1	7	0	0
9/22/19	8a8d5b00	L1-10	7	617	L1	7	0	0
9/23/19	8a8d5b00	L1-10	7	624	L1	7	0	0
9/24/19	8a8d5b00	L1-10	7	611	L1	7	0	0
9/25/19	8a8d5b00	L1-10	7	637	L1	7	0	0
9/26/19	8a8d5b00	L1-10	7	584	L1	7	0	0
9/27/19	8a8d5b00	L1-10	7	591	L1	7	0	0
9/29/19	8a8d5b00	L1-10	3	583	L1	7	4	0
9/30/19	8a8d5b00	L1-10	6	576	L1	7	1	0
10/1/19	8a8d5b00	L1-10	7	590	L1	7	0	0
10/2/19	8a8d5b00	L1-10	7	583	L1	7	0	0
10/3/19	8a8d5b00	L1-10	7	561	L1	7	0	0
10/4/19	8a8d5b00	L1-10	7	574	L1	7	0	0
10/5/19	8a8d5b00	L1-10	7	577	L1	7	0	0
10/6/19	8a8d5b00	L1-10	7	566	L1	7	0	0
10/7/19	8a8d5b00	L1-10	7	577	L1	7	0	0
10/8/19	8a8d5b00	L1-10	7	530	L1	7	0	0
10/9/19	8a8d5b00	L1-10	7	512	L1	7	0	0
10/10/19	8a8d5b00	L1-10	7	519	L1	7	0	0
10/11/19	8a8d5b00	L1-10	7	463	L1	7	0	0
10/12/19	8a8d5b00	L1-10	7	411	L1	7	0	0
10/13/19	8a8d5b00	L1-10	7	390	L1	7	0	0
10/14/19	8a8d5b00	L1-10	7	391	L1	7	0	0
10/15/19	8a8d5b00	L1-10	7	358	L1	7	0	0
10/16/19	8a8d5b00	L1-10	7	418	L1	7	0	0
10/17/19	8a8d5b00	L1-10	7	544	L1	7	0	0
10/18/19	8a8d5b00	L1-10	7	533	L1	7	0	0
10/19/19	8a8d5b00	L1-10	7	561	L1	7	0	0
10/20/19	8a8d5b00	L1-10	7	503	L1	7	0	0
10/21/19	8a8d5b00	L1-10	7	566	L1	7	0	0
10/23/19	8a8d5b00	L1-10	2	539	L1	7	5	0
10/24/19	8a8d5b00	L1-10	7	528	L1	7	0	0
10/25/19	8a8d5b00	L1-10	7	472	L1	7	0	0
10/26/19	8a8d5b00	L1-10	7	569	L1	7	0	0
10/27/19	8a8d5b00	L1-10	7	571	L1	7	0	0
10/28/19	8a8d5b00	L1-10	7	568	L1	7	0	0
10/29/19	8a8d5b00	L1-10	7	612	L1	7	0	0
10/30/19	8a8d5b00	L1-10	7	599	L1	7	0	0
10/31/19	8a8d5b00	L1-10	7	610	L1	7	0	0
11/1/19	8a8d5b00	L1-10	7	605	L1	7	0	0
11/2/19	8a8d5b00	L1-10	7	611	L1	7	0	0
11/3/19	8a8d5b00	L1-10	7	612	L1	7	0	0
11/4/19	8a8d5b00	L1-10	6	614	L1	7	1	0
11/5/19	8a8d5b00	L1-10	5	613	L1	7	2	0
11/6/19	8a8d5b00	L1-10	7	583	L1	7	0	0
11/7/19	8a8d5b00	L1-10	7	616	L1	7	0	0
11/8/19	8a8d5b00	L1-10	6	576	L1	7	1	0
11/9/19	8a8d5b00	L1-10	7	582	L1	7	0	0
11/10/19	8a8d5b00	L1-10	7	585	L1	7	0	0
11/11/19	8a8d5b00	L1-10	7	361	L1	7	0	0
11/12/19	8a8d5b00	L1-10	7	272	L1	7	0	0
11/13/19	8a8d5b00	L1-10	6	244	L1	7	1	0
11/14/19	8a8d5b00	L1-10	7	393	L1	7	0	0
11/15/19	8a8d5b00	L1-10	7	592	L1	7	0	0
11/16/19	8a8d5b00	L1-10	7	572	L1	7	0	0
11/17/19	8a8d5b00	L1-10	7	573	L1	7	0	0
11/18/19	8a8d5b00	L1-10	1	572	L1	7	6	0
11/21/19	8a8d5b00	L1-10	4	540	L1	7	3	0
11/22/19	8a8d5b00	L1-10	7	524	L1	7	0	0
11/23/19	8a8d5b00	L1-10	7	544	L1	7	0	0
11/24/19	8a8d5b00	L1-10	7	249	L1	7	0	0
11/25/19	8a8d5b00	L1-10	7	166	L1	7	0	0
11/26/19	8a8d5b00	L1-10	7	131	L1	7	0	0
11/27/19	8a8d5b00	L1-10	7	80	L1	7	0	0
11/28/19	8a8d5b00	L1-10	7	6	L1	7	0	0
11/29/19	8a8d5b00	L1-10	7	2	L1	7	0	0
11/30/19	8a8d5b00	L1-10	7	4	L1	7	0	0
12/1/19	8a8d5b00	L1-10	7	0	L1	7	0	0
12/2/19	8a8d5b00	L1-10	7	29	L1	7	0	0
12/3/19	8a8d5b00	L1-10	7	8	L1	7	0	0
12/4/19	8a8d5b00	L1-10	7	8	L1	7	0	0
12/5/19	8a8d5b00	L1-10	7	7	L1	7	0	0
12/6/19	8a8d5b00	L1-10	6	232	L1	7	1	0
12/7/19	8a8d5b00	L1-10	7	448	L1	7	0	0
12/8/19	8a8d5b00	L1-10	7	481	L1	7	0	0
12/9/19	8a8d5b00	L1-10	7	455	L1	7	0	0
12/10/19	8a8d5b00	L1-10	7	434	L1	7	0	0
12/11/19	8a8d5b00	L1-10	7	389	L1	7	0	0
12/12/19	8a8d5b00	L1-10	7	262	L1	7	0	0
12/13/19	8a8d5b00	L1-10	7	166	L1	7	0	0
12/14/19	8a8d5b00	L1-10	7	283	L1	7	0	0
12/15/19	8a8d5b00	L1-10	7	366	L1	7	0	0
12/16/19	8a8d5b00	L1-10	7	435	L1	7	0	0
12/17/19	8a8d5b00	L1-10	3	459	L1	7	4	0
12/18/19	8a8d5b00	L1-10	7	428	L1	7	0	0
12/19/19	8a8d5b00	L1-10	7	501	L1	7	0	0
12/20/19	8a8d5b00	L1-10	7	509	L1	7	0	0
12/21/19	8a8d5b00	L1-10	7	512	L1	7	0	0
12/22/19	8a8d5b00	L1-10	7	503	L1	7	0	0
12/23/19	8a8d5b00	L1-10	7	213	L1	7	0	0
12/24/19	8a8d5b00	L1-10	7	84	L1	7	0	0
12/25/19	8a8d5b00	L1-10	7	98	L1	7	0	0
12/26/19	8a8d5b00	L1-10	6	101	L1	7	1	0
12/27/19	8a8d5b00	L1-10	6	103	L1	7	1	0
12/28/19	8a8d5b00	L1-10	7	94	L1	7	0	0
12/29/19	8a8d5b00	L1-10	7	88	L1	7	0	0
12/30/19	8a8d5b00	L1-10	7	88	L1	7	0	0
12/31/19	8a8d5b00	L1-10	7	86	L1	7	0	0
1/1/20	8a8d5b00	L1-10	7	88	L1	7	0	0
1/2/20	8a8d5b00	L1-10	7	76	L1	7	0	0
1/3/20	8a8d5b00	L1-10	4	78	L1	7	3	0
1/4/20	8a8d5b00	L1-10	7	139	L1	7	0	0
1/5/20	8a8d5b00	L1-10	6	377	L1	7	1	0
1/6/20	8a8d5b00	L1-10	7	194	L1	7	0	0
1/7/20	8a8d5b00	L1-10	7	421	L1	7	0	0
1/8/20	8a8d5b00	L1-10	7	316	L1	7	0	0
1/9/20	8a8d5b00	L1-10	7	104	L1	7	0	0
1/10/20	8a8d5b00	L1-10	4	91	L1	7	3	0
1/13/20	8a8d5b00	L1-10	4	456	L1	7	3	0
1/14/20	8a8d5b00	L1-10	7	473	L1	7	0	0
1/15/20	8a8d5b00	L1-10	7	478	L1	7	0	0
1/16/20	8a8d5b00	L1-10	7	503	L1	7	0	0
1/17/20	8a8d5b00	L1-10	2	467	L1	7	5	0
2/18/20	8a8d5b00	L1-10	3	508	L1	7	4	0
2/19/20	8a8d5b00	L1-10	1	462	L1	7	6	0
2/20/20	8a8d5b00	L1-10	7	347	L1	7	0	0
2/21/20	8a8d5b00	L1-10	7	470	L1	7	0	0
2/22/20	8a8d5b00	L1-10	7	477	L1	7	0	0
2/23/20	8a8d5b00	L1-10	7	488	L1	7	0	0
2/24/20	8a8d5b00	L1-10	7	481	L1	7	0	0
2/25/20	8a8d5b00	L1-10	7	496	L1	7	0	0
2/26/20	8a8d5b00	L1-10	7	502	L1	7	0	0
2/27/20	8a8d5b00	L1-10	7	498	L1	7	0	0
2/28/20	8a8d5b00	L1-10	7	493	L1	7	0	0
2/29/20	8a8d5b00	L1-10	6	479	L1	7	1	0
3/1/20	8a8d5b00	L1-10	7	489	L1	7	0	0
3/2/20	8a8d5b00	L1-10	7	491	L1	7	0	0
3/3/20	8a8d5b00	L1-10	1	539	L1	7	6	0
3/4/20	8a8d5b00	L1-10	7	499	L1	7	0	0
3/5/20	8a8d5b00	L1-10	7	478	L1	7	0	0
3/6/20	8a8d5b00	L1-10	7	486	L1	7	0	0
3/7/20	8a8d5b00	L1-10	7	485	L1	7	0	0
3/8/20	8a8d5b00	L1-10	7	506	L1	7	0	0
3/9/20	8a8d5b00	L1-10	7	499	L1	7	0	0
3/10/20	8a8d5b00	L1-10	7	496	L1	7	0	0
3/11/20	8a8d5b00	L1-10	7	500	L1	7	0	0
3/12/20	8a8d5b00	L1-10	7	477	L1	7	0	0
3/13/20	8a8d5b00	L1-10	7	473	L1	7	0	0
3/14/20	8a8d5b00	L1-10	7	489	L1	7	0	0
3/15/20	8a8d5b00	L1-10	7	478	L1	7	0	0
3/16/20	8a8d5b00	L1-10	7	488	L1	7	0	0
3/17/20	8a8d5b00	L1-10	7	498	L1	7	0	0
3/18/20	8a8d5b00	L1-10	7	487	L1	7	0	0
3/19/20	8a8d5b00	L1-10	7	476	L1	7	0	0
3/20/20	8a8d5b00	L1-10	7	505	L1	7	0	0
3/21/20	8a8d5b00	L1-10	7	474	L1	7	0	0
3/22/20	8a8d5b00	L1-10	7	473	L1	7	0	0
3/23/20	8a8d5b00	L1-10	7	485	L1	7	0	0
3/24/20	8a8d5b00	L1-10	7	445	L1	7	0	0
3/25/20	8a8d5b00	L1-10	7	358	L1	7	0	0
3/26/20	8a8d5b00	L1-10	7	496	L1	7	0	0
3/27/20	8a8d5b00	L1-10	7	476	L1	7	0	0
3/28/20	8a8d5b00	L1-10	7	491	L1	7	0	0
3/29/20	8a8d5b00	L1-10	7	510	L1	7	0	0
3/30/20	8a8d5b00	L1-10	7	492	L1	7	0	0
3/31/20	8a8d5b00	L1-10	7	500	L1	7	0	0
4/1/20	8a8d5b00	L1-10	7	508	L1	7	0	0
4/2/20	8a8d5b00	L1-10	7	495	L1	7	0	0
4/3/20	8a8d5b00	L1-10	7	497	L1	7	0	0
4/4/20	8a8d5b00	L1-10	7	496	L1	7	0	0
4/5/20	8a8d5b00	L1-10	7	464	L1	7	0	0
4/6/20	8a8d5b00	L1-10	7	488	L1	7	0	0
4/7/20	8a8d5b00	L1-10	7	283	L1	7	0	0
4/8/20	8a8d5b00	L1-10	7	234	L1	7	0	0
4/9/20	8a8d5b00	L1-10	7	65	L1	7	0	0
4/10/20	8a8d5b00	L1-10	7	88	L1	7	0	0
4/11/20	8a8d5b00	L1-10	7	331	L1	7	0	0
4/12/20	8a8d5b00	L1-10	7	337	L1	7	0	0
4/13/20	8a8d5b00	L1-10	7	216	L1	7	0	0
4/14/20	8a8d5b00	L1-10	7	294	L1	7	0	0
4/15/20	8a8d5b00	L1-10	7	495	L1	7	0	0
4/16/20	8a8d5b00	L1-10	7	422	L1	7	0	0
4/17/20	8a8d5b00	L1-10	7	284	L1	7	0	0
4/18/20	8a8d5b00	L1-10	7	130	L1	7	0	0
4/19/20	8a8d5b00	L1-10	7	102	L1	7	0	0
4/20/20	8a8d5b00	L1-10	7	120	L1	7	0	0
4/21/20	8a8d5b00	L1-10	7	119	L1	7	0	0
4/22/20	8a8d5b00	L1-10	7	135	L1	7	0	0
4/23/20	8a8d5b00	L1-10	7	134	L1	7	0	0
8/30/19	4f8f5b00	L1-11	5	586	L1	7	2	0
8/31/19	4f8f5b00	L1-11	7	642	L1	7	0	0
9/1/19	4f8f5b00	L1-11	7	636	L1	7	0	0
9/2/19	4f8f5b00	L1-11	7	626	L1	7	0	0
9/3/19	4f8f5b00	L1-11	7	440	L1	7	0	0
9/4/19	4f8f5b00	L1-11	7	379	L1	7	0	0
9/5/19	4f8f5b00	L1-11	7	393	L1	7	0	0
9/6/19	4f8f5b00	L1-11	7	425	L1	7	0	0
9/7/19	4f8f5b00	L1-11	7	311	L1	7	0	0
9/8/19	4f8f5b00	L1-11	7	337	L1	7	0	0
9/9/19	4f8f5b00	L1-11	7	396	L1	7	0	0
9/10/19	4f8f5b00	L1-11	6	450	L1	7	1	0
9/11/19	4f8f5b00	L1-11	7	257	L1	7	0	0
9/12/19	4f8f5b00	L1-11	6	170	L1	7	1	0
9/13/19	4f8f5b00	L1-11	1	134	L1	7	6	0
9/14/19	4f8f5b00	L1-11	7	38	L1	7	0	0
9/15/19	4f8f5b00	L1-11	7	18	L1	7	0	0
9/16/19	4f8f5b00	L1-11	7	170	L1	7	0	0
9/17/19	4f8f5b00	L1-11	7	435	L1	7	0	0
9/18/19	4f8f5b00	L1-11	7	631	L1	7	0	0
9/19/19	4f8f5b00	L1-11	7	631	L1	7	0	0
9/20/19	4f8f5b00	L1-11	7	618	L1	7	0	0
9/21/19	4f8f5b00	L1-11	7	622	L1	7	0	0
9/22/19	4f8f5b00	L1-11	7	627	L1	7	0	0
9/23/19	4f8f5b00	L1-11	7	569	L1	7	0	0
9/24/19	4f8f5b00	L1-11	7	570	L1	7	0	0
9/25/19	4f8f5b00	L1-11	7	559	L1	7	0	0
9/26/19	4f8f5b00	L1-11	7	587	L1	7	0	0
9/27/19	4f8f5b00	L1-11	7	605	L1	7	0	0
9/29/19	4f8f5b00	L1-11	3	591	L1	7	4	0
9/30/19	4f8f5b00	L1-11	7	607	L1	7	0	0
10/1/19	4f8f5b00	L1-11	7	616	L1	7	0	0
10/2/19	4f8f5b00	L1-11	7	606	L1	7	0	0
10/3/19	4f8f5b00	L1-11	7	604	L1	7	0	0
10/4/19	4f8f5b00	L1-11	7	627	L1	7	0	0
10/5/19	4f8f5b00	L1-11	6	602	L1	7	1	0
10/6/19	4f8f5b00	L1-11	7	552	L1	7	0	0
10/7/19	4f8f5b00	L1-11	7	581	L1	7	0	0
10/8/19	4f8f5b00	L1-11	7	613	L1	7	0	0
10/9/19	4f8f5b00	L1-11	7	597	L1	7	0	0
10/10/19	4f8f5b00	L1-11	7	614	L1	7	0	0
10/11/19	4f8f5b00	L1-11	7	609	L1	7	0	0
10/12/19	4f8f5b00	L1-11	7	609	L1	7	0	0
10/13/19	4f8f5b00	L1-11	7	610	L1	7	0	0
10/14/19	4f8f5b00	L1-11	7	627	L1	7	0	0
10/15/19	4f8f5b00	L1-11	7	596	L1	7	0	0
10/16/19	4f8f5b00	L1-11	7	601	L1	7	0	0
10/17/19	4f8f5b00	L1-11	7	596	L1	7	0	0
10/18/19	4f8f5b00	L1-11	7	581	L1	7	0	0
10/19/19	4f8f5b00	L1-11	7	584	L1	7	0	0
10/20/19	4f8f5b00	L1-11	7	552	L1	7	0	0
10/21/19	4f8f5b00	L1-11	7	571	L1	7	0	0
10/23/19	4f8f5b00	L1-11	2	598	L1	7	5	0
10/24/19	4f8f5b00	L1-11	7	587	L1	7	0	0
10/25/19	4f8f5b00	L1-11	7	587	L1	7	0	0
10/26/19	4f8f5b00	L1-11	7	593	L1	7	0	0
10/27/19	4f8f5b00	L1-11	7	621	L1	7	0	0
10/28/19	4f8f5b00	L1-11	7	628	L1	7	0	0
10/29/19	4f8f5b00	L1-11	7	574	L1	7	0	0
10/30/19	4f8f5b00	L1-11	7	611	L1	7	0	0
10/31/19	4f8f5b00	L1-11	7	607	L1	7	0	0
11/1/19	4f8f5b00	L1-11	7	617	L1	7	0	0
11/2/19	4f8f5b00	L1-11	7	618	L1	7	0	0
11/3/19	4f8f5b00	L1-11	7	610	L1	7	0	0
11/4/19	4f8f5b00	L1-11	7	604	L1	7	0	0
11/5/19	4f8f5b00	L1-11	5	590	L1	7	2	0
11/6/19	4f8f5b00	L1-11	7	604	L1	7	0	0
11/7/19	4f8f5b00	L1-11	7	613	L1	7	0	0
11/8/19	4f8f5b00	L1-11	7	565	L1	7	0	0
11/9/19	4f8f5b00	L1-11	7	598	L1	7	0	0
11/10/19	4f8f5b00	L1-11	7	515	L1	7	0	0
11/11/19	4f8f5b00	L1-11	7	492	L1	7	0	0
11/12/19	4f8f5b00	L1-11	6	429	L1	7	1	0
11/13/19	4f8f5b00	L1-11	7	565	L1	7	0	0
11/14/19	4f8f5b00	L1-11	7	559	L1	7	0	0
11/15/19	4f8f5b00	L1-11	7	607	L1	7	0	0
11/16/19	4f8f5b00	L1-11	7	559	L1	7	0	0
11/17/19	4f8f5b00	L1-11	7	569	L1	7	0	0
11/18/19	4f8f5b00	L1-11	7	537	L1	7	0	0
11/19/19	4f8f5b00	L1-11	4	548	L1	7	3	0
11/20/19	4f8f5b00	L1-11	7	524	L1	7	0	0
11/21/19	4f8f5b00	L1-11	7	585	L1	7	0	0
11/22/19	4f8f5b00	L1-11	7	598	L1	7	0	0
11/23/19	4f8f5b00	L1-11	7	625	L1	7	0	0
11/24/19	4f8f5b00	L1-11	7	599	L1	7	0	0
11/25/19	4f8f5b00	L1-11	7	605	L1	7	0	0
11/26/19	4f8f5b00	L1-11	7	602	L1	7	0	0
11/27/19	4f8f5b00	L1-11	7	617	L1	7	0	0
11/28/19	4f8f5b00	L1-11	7	603	L1	7	0	0
11/29/19	4f8f5b00	L1-11	7	462	L1	7	0	0
11/30/19	4f8f5b00	L1-11	7	572	L1	7	0	0
12/1/19	4f8f5b00	L1-11	7	577	L1	7	0	0
12/2/19	4f8f5b00	L1-11	7	565	L1	7	0	0
12/3/19	4f8f5b00	L1-11	7	536	L1	7	0	0
12/4/19	4f8f5b00	L1-11	7	480	L1	7	0	0
12/5/19	4f8f5b00	L1-11	7	489	L1	7	0	0
12/6/19	4f8f5b00	L1-11	7	470	L1	7	0	0
12/7/19	4f8f5b00	L1-11	7	517	L1	7	0	0
12/8/19	4f8f5b00	L1-11	7	508	L1	7	0	0
12/9/19	4f8f5b00	L1-11	7	488	L1	7	0	0
12/10/19	4f8f5b00	L1-11	7	459	L1	7	0	0
12/11/19	4f8f5b00	L1-11	7	444	L1	7	0	0
12/12/19	4f8f5b00	L1-11	7	408	L1	7	0	0
12/13/19	4f8f5b00	L1-11	6	369	L1	7	1	0
12/14/19	4f8f5b00	L1-11	7	372	L1	7	0	0
12/15/19	4f8f5b00	L1-11	7	371	L1	7	0	0
12/16/19	4f8f5b00	L1-11	7	332	L1	7	0	0
12/17/19	4f8f5b00	L1-11	3	356	L1	7	4	0
12/18/19	4f8f5b00	L1-11	7	375	L1	7	0	0
12/19/19	4f8f5b00	L1-11	7	535	L1	7	0	0
12/20/19	4f8f5b00	L1-11	7	499	L1	7	0	0
12/21/19	4f8f5b00	L1-11	7	509	L1	7	0	0
12/22/19	4f8f5b00	L1-11	7	321	L1	7	0	0
12/23/19	4f8f5b00	L1-11	6	308	L1	7	1	0
12/24/19	4f8f5b00	L1-11	7	333	L1	7	0	0
12/25/19	4f8f5b00	L1-11	7	296	L1	7	0	0
12/26/19	4f8f5b00	L1-11	7	159	L1	7	0	0
12/27/19	4f8f5b00	L1-11	6	41	L1	7	1	0
12/28/19	4f8f5b00	L1-11	7	76	L1	7	0	0
12/29/19	4f8f5b00	L1-11	7	559	L1	7	0	0
12/30/19	4f8f5b00	L1-11	7	580	L1	7	0	0
12/31/19	4f8f5b00	L1-11	7	561	L1	7	0	0
1/1/20	4f8f5b00	L1-11	7	567	L1	7	0	0
1/2/20	4f8f5b00	L1-11	7	585	L1	7	0	0
1/3/20	4f8f5b00	L1-11	4	568	L1	7	3	0
1/4/20	4f8f5b00	L1-11	7	573	L1	7	0	0
1/5/20	4f8f5b00	L1-11	7	560	L1	7	0	0
1/6/20	4f8f5b00	L1-11	6	603	L1	7	1	0
1/7/20	4f8f5b00	L1-11	7	570	L1	7	0	0
1/8/20	4f8f5b00	L1-11	7	453	L1	7	0	0
1/9/20	4f8f5b00	L1-11	7	287	L1	7	0	0
1/10/20	4f8f5b00	L1-11	4	288	L1	7	3	0
1/13/20	4f8f5b00	L1-11	4	552	L1	7	3	0
1/14/20	4f8f5b00	L1-11	7	568	L1	7	0	0
1/15/20	4f8f5b00	L1-11	7	572	L1	7	0	0
1/16/20	4f8f5b00	L1-11	7	575	L1	7	0	0
1/17/20	4f8f5b00	L1-11	2	595	L1	7	5	0
8/30/19	4a7b3e00	L1-12	1	675	L1	7	6	0
8/31/19	4a7b3e00	L1-12	7	581	L1	7	0	0
9/1/19	4a7b3e00	L1-12	7	549	L1	7	0	0
9/2/19	4a7b3e00	L1-12	7	494	L1	7	0	0
9/3/19	4a7b3e00	L1-12	7	487	L1	7	0	0
9/4/19	4a7b3e00	L1-12	7	467	L1	7	0	0
9/5/19	4a7b3e00	L1-12	7	426	L1	7	0	0
9/6/19	4a7b3e00	L1-12	7	444	L1	7	0	0
9/7/19	4a7b3e00	L1-12	7	444	L1	7	0	0
9/8/19	4a7b3e00	L1-12	7	423	L1	7	0	0
9/9/19	4a7b3e00	L1-12	4	271	L1	7	3	0
9/13/19	4a7b3e00	L1-12	1	639	L1	7	6	0
9/14/19	4a7b3e00	L1-12	7	647	L1	7	0	0
9/15/19	4a7b3e00	L1-12	7	603	L1	7	0	0
9/16/19	4a7b3e00	L1-12	7	610	L1	7	0	0
9/17/19	4a7b3e00	L1-12	7	587	L1	7	0	0
9/18/19	4a7b3e00	L1-12	6	544	L1	7	1	0
9/19/19	4a7b3e00	L1-12	7	548	L1	7	0	0
9/20/19	4a7b3e00	L1-12	7	492	L1	7	0	0
9/21/19	4a7b3e00	L1-12	7	519	L1	7	0	0
9/22/19	4a7b3e00	L1-12	7	484	L1	7	0	0
9/23/19	4a7b3e00	L1-12	7	450	L1	7	0	0
9/24/19	4a7b3e00	L1-12	7	486	L1	7	0	0
9/25/19	4a7b3e00	L1-12	7	454	L1	7	0	0
9/26/19	4a7b3e00	L1-12	7	452	L1	7	0	0
9/27/19	4a7b3e00	L1-12	7	428	L1	7	0	0
9/29/19	4a7b3e00	L1-12	3	435	L1	7	4	0
9/30/19	4a7b3e00	L1-12	7	428	L1	7	0	0
10/1/19	4a7b3e00	L1-12	7	372	L1	7	0	0
10/2/19	4a7b3e00	L1-12	7	571	L1	7	0	0
10/3/19	4a7b3e00	L1-12	7	545	L1	7	0	0
10/4/19	4a7b3e00	L1-12	7	525	L1	7	0	0
10/5/19	4a7b3e00	L1-12	7	581	L1	7	0	0
10/6/19	4a7b3e00	L1-12	7	582	L1	7	0	0
10/7/19	4a7b3e00	L1-12	7	576	L1	7	0	0
10/8/19	4a7b3e00	L1-12	7	541	L1	7	0	0
10/9/19	4a7b3e00	L1-12	7	516	L1	7	0	0
10/10/19	4a7b3e00	L1-12	7	532	L1	7	0	0
10/11/19	4a7b3e00	L1-12	7	524	L1	7	0	0
10/12/19	4a7b3e00	L1-12	7	514	L1	7	0	0
10/13/19	4a7b3e00	L1-12	7	530	L1	7	0	0
10/14/19	4a7b3e00	L1-12	7	508	L1	7	0	0
10/15/19	4a7b3e00	L1-12	6	485	L1	7	1	0
10/16/19	4a7b3e00	L1-12	7	501	L1	7	0	0
10/17/19	4a7b3e00	L1-12	7	503	L1	7	0	0
10/18/19	4a7b3e00	L1-12	7	496	L1	7	0	0
10/19/19	4a7b3e00	L1-12	7	450	L1	7	0	0
10/20/19	4a7b3e00	L1-12	7	472	L1	7	0	0
10/21/19	4a7b3e00	L1-12	7	537	L1	7	0	0
10/23/19	4a7b3e00	L1-12	2	590	L1	7	5	0
10/24/19	4a7b3e00	L1-12	7	560	L1	7	0	0
10/25/19	4a7b3e00	L1-12	7	470	L1	7	0	0
10/26/19	4a7b3e00	L1-12	7	596	L1	7	0	0
10/27/19	4a7b3e00	L1-12	6	606	L1	7	1	0
10/28/19	4a7b3e00	L1-12	6	584	L1	7	1	0
10/29/19	4a7b3e00	L1-12	7	582	L1	7	0	0
10/30/19	4a7b3e00	L1-12	7	567	L1	7	0	0
10/31/19	4a7b3e00	L1-12	7	508	L1	7	0	0
11/1/19	4a7b3e00	L1-12	7	463	L1	7	0	0
11/2/19	4a7b3e00	L1-12	7	422	L1	7	0	0
11/3/19	4a7b3e00	L1-12	7	384	L1	7	0	0
11/4/19	4a7b3e00	L1-12	7	297	L1	7	0	0
11/5/19	4a7b3e00	L1-12	5	257	L1	7	2	0
11/6/19	4a7b3e00	L1-12	7	256	L1	7	0	0
11/7/19	4a7b3e00	L1-12	7	309	L1	7	0	0
11/8/19	4a7b3e00	L1-12	7	305	L1	7	0	0
11/9/19	4a7b3e00	L1-12	7	155	L1	7	0	0
11/10/19	4a7b3e00	L1-12	7	17	L1	7	0	0
11/11/19	4a7b3e00	L1-12	7	180	L1	7	0	0
11/12/19	4a7b3e00	L1-12	7	542	L1	7	0	0
11/13/19	4a7b3e00	L1-12	7	492	L1	7	0	0
11/14/19	4a7b3e00	L1-12	7	518	L1	7	0	0
11/15/19	4a7b3e00	L1-12	7	508	L1	7	0	0
11/16/19	4a7b3e00	L1-12	7	560	L1	7	0	0
11/17/19	4a7b3e00	L1-12	7	589	L1	7	0	0
11/18/19	4a7b3e00	L1-12	7	597	L1	7	0	0
11/19/19	4a7b3e00	L1-12	3	630	L1	7	4	0
11/21/19	4a7b3e00	L1-12	4	701	L1	7	3	0
11/22/19	4a7b3e00	L1-12	7	678	L1	7	0	0
11/23/19	4a7b3e00	L1-12	7	644	L1	7	0	0
11/24/19	4a7b3e00	L1-12	7	646	L1	7	0	0
11/25/19	4a7b3e00	L1-12	7	638	L1	7	0	0
11/26/19	4a7b3e00	L1-12	7	615	L1	7	0	0
11/27/19	4a7b3e00	L1-12	7	578	L1	7	0	0
11/28/19	4a7b3e00	L1-12	7	540	L1	7	0	0
11/29/19	4a7b3e00	L1-12	7	528	L1	7	0	0
11/30/19	4a7b3e00	L1-12	7	524	L1	7	0	0
12/1/19	4a7b3e00	L1-12	7	438	L1	7	0	0
12/2/19	4a7b3e00	L1-12	7	412	L1	7	0	0
12/3/19	4a7b3e00	L1-12	7	397	L1	7	0	0
12/4/19	4a7b3e00	L1-12	7	447	L1	7	0	0
12/5/19	4a7b3e00	L1-12	7	441	L1	7	0	0
12/6/19	4a7b3e00	L1-12	7	531	L1	7	0	0
12/7/19	4a7b3e00	L1-12	7	541	L1	7	0	0
12/8/19	4a7b3e00	L1-12	7	446	L1	7	0	0
12/9/19	4a7b3e00	L1-12	7	506	L1	7	0	0
12/10/19	4a7b3e00	L1-12	7	531	L1	7	0	0
12/11/19	4a7b3e00	L1-12	7	571	L1	7	0	0
12/12/19	4a7b3e00	L1-12	7	503	L1	7	0	0
12/13/19	4a7b3e00	L1-12	7	531	L1	7	0	0
12/14/19	4a7b3e00	L1-12	7	588	L1	7	0	0
12/15/19	4a7b3e00	L1-12	7	571	L1	7	0	0
12/16/19	4a7b3e00	L1-12	7	579	L1	7	0	0
12/17/19	4a7b3e00	L1-12	3	563	L1	7	4	0
12/18/19	4a7b3e00	L1-12	7	531	L1	7	0	0
12/19/19	4a7b3e00	L1-12	7	564	L1	7	0	0
12/20/19	4a7b3e00	L1-12	7	568	L1	7	0	0
12/21/19	4a7b3e00	L1-12	7	556	L1	7	0	0
12/22/19	4a7b3e00	L1-12	7	542	L1	7	0	0
12/23/19	4a7b3e00	L1-12	7	527	L1	7	0	0
12/24/19	4a7b3e00	L1-12	7	508	L1	7	0	0
12/25/19	4a7b3e00	L1-12	7	468	L1	7	0	0
12/26/19	4a7b3e00	L1-12	7	415	L1	7	0	0
12/27/19	4a7b3e00	L1-12	6	333	L1	7	1	0
12/28/19	4a7b3e00	L1-12	7	277	L1	7	0	0
12/29/19	4a7b3e00	L1-12	7	386	L1	7	0	0
12/30/19	4a7b3e00	L1-12	7	393	L1	7	0	0
12/31/19	4a7b3e00	L1-12	7	378	L1	7	0	0
1/1/20	4a7b3e00	L1-12	7	389	L1	7	0	0
1/2/20	4a7b3e00	L1-12	7	390	L1	7	0	0
1/3/20	4a7b3e00	L1-12	4	393	L1	7	3	0
1/4/20	4a7b3e00	L1-12	7	428	L1	7	0	0
1/5/20	4a7b3e00	L1-12	7	428	L1	7	0	0
1/6/20	4a7b3e00	L1-12	7	580	L1	7	0	0
1/7/20	4a7b3e00	L1-12	7	620	L1	7	0	0
1/8/20	4a7b3e00	L1-12	7	638	L1	7	0	0
1/9/20	4a7b3e00	L1-12	7	635	L1	7	0	0
1/10/20	4a7b3e00	L1-12	4	671	L1	7	3	0
1/13/20	4a7b3e00	L1-12	4	647	L1	7	3	0
1/14/20	4a7b3e00	L1-12	7	611	L1	7	0	0
1/15/20	4a7b3e00	L1-12	7	611	L1	7	0	0
1/16/20	4a7b3e00	L1-12	7	567	L1	7	0	0
1/17/20	4a7b3e00	L1-12	3	542	L1	7	4	0
8/30/19	7055c700	L1-13	1	605	L1	7	6	0
8/31/19	7055c700	L1-13	7	583	L1	7	0	0
9/1/19	7055c700	L1-13	7	577	L1	7	0	0
9/2/19	7055c700	L1-13	7	586	L1	7	0	0
9/3/19	7055c700	L1-13	7	561	L1	7	0	0
9/4/19	7055c700	L1-13	7	574	L1	7	0	0
9/5/19	7055c700	L1-13	7	573	L1	7	0	0
9/6/19	7055c700	L1-13	7	552	L1	7	0	0
9/7/19	7055c700	L1-13	7	572	L1	7	0	0
9/8/19	7055c700	L1-13	7	571	L1	7	0	0
9/9/19	7055c700	L1-13	7	578	L1	7	0	0
9/10/19	7055c700	L1-13	7	544	L1	7	0	0
9/11/19	7055c700	L1-13	7	554	L1	7	0	0
9/12/19	7055c700	L1-13	7	575	L1	7	0	0
9/13/19	7055c700	L1-13	7	568	L1	7	0	0
9/14/19	7055c700	L1-13	7	599	L1	7	0	0
9/15/19	7055c700	L1-13	7	591	L1	7	0	0
9/16/19	7055c700	L1-13	7	603	L1	7	0	0
9/17/19	7055c700	L1-13	7	563	L1	7	0	0
9/18/19	7055c700	L1-13	7	570	L1	7	0	0
9/19/19	7055c700	L1-13	7	569	L1	7	0	0
9/20/19	7055c700	L1-13	7	597	L1	7	0	0
9/21/19	7055c700	L1-13	7	599	L1	7	0	0
9/22/19	7055c700	L1-13	7	594	L1	7	0	0
9/23/19	7055c700	L1-13	7	597	L1	7	0	0
9/24/19	7055c700	L1-13	7	584	L1	7	0	0
9/25/19	7055c700	L1-13	7	581	L1	7	0	0
9/26/19	7055c700	L1-13	6	416	L1	7	1	0
9/27/19	7055c700	L1-13	7	366	L1	7	0	0
9/29/19	7055c700	L1-13	3	542	L1	7	4	0
9/30/19	7055c700	L1-13	7	456	L1	7	0	0
10/1/19	7055c700	L1-13	7	509	L1	7	0	0
10/2/19	7055c700	L1-13	7	510	L1	7	0	0
10/3/19	7055c700	L1-13	7	509	L1	7	0	0
10/4/19	7055c700	L1-13	7	462	L1	7	0	0
10/5/19	7055c700	L1-13	7	518	L1	7	0	0
10/6/19	7055c700	L1-13	7	515	L1	7	0	0
10/7/19	7055c700	L1-13	7	530	L1	7	0	0
10/8/19	7055c700	L1-13	7	441	L1	7	0	0
10/9/19	7055c700	L1-13	7	521	L1	7	0	0
10/10/19	7055c700	L1-13	7	542	L1	7	0	0
10/11/19	7055c700	L1-13	7	541	L1	7	0	0
10/12/19	7055c700	L1-13	7	531	L1	7	0	0
10/13/19	7055c700	L1-13	7	475	L1	7	0	0
10/14/19	7055c700	L1-13	7	426	L1	7	0	0
10/15/19	7055c700	L1-13	7	452	L1	7	0	0
10/16/19	7055c700	L1-13	7	436	L1	7	0	0
10/17/19	7055c700	L1-13	7	390	L1	7	0	0
10/18/19	7055c700	L1-13	7	501	L1	7	0	0
10/19/19	7055c700	L1-13	7	491	L1	7	0	0
10/20/19	7055c700	L1-13	7	533	L1	7	0	0
10/21/19	7055c700	L1-13	7	528	L1	7	0	0
10/23/19	7055c700	L1-13	2	472	L1	7	5	0
10/24/19	7055c700	L1-13	7	535	L1	7	0	0
10/25/19	7055c700	L1-13	7	571	L1	7	0	0
10/26/19	7055c700	L1-13	7	523	L1	7	0	0
10/27/19	7055c700	L1-13	7	538	L1	7	0	0
10/28/19	7055c700	L1-13	7	474	L1	7	0	0
10/29/19	7055c700	L1-13	7	540	L1	7	0	0
10/30/19	7055c700	L1-13	7	513	L1	7	0	0
10/31/19	7055c700	L1-13	7	509	L1	7	0	0
11/1/19	7055c700	L1-13	7	521	L1	7	0	0
11/2/19	7055c700	L1-13	7	523	L1	7	0	0
11/3/19	7055c700	L1-13	7	553	L1	7	0	0
11/4/19	7055c700	L1-13	7	8	L1	7	0	0
11/5/19	7055c700	L1-13	6	24	L1	7	1	0
11/6/19	7055c700	L1-13	7	132	L1	7	0	0
11/7/19	7055c700	L1-13	7	409	L1	7	0	0
11/8/19	7055c700	L1-13	7	34	L1	7	0	0
11/9/19	7055c700	L1-13	7	15	L1	7	0	0
11/10/19	7055c700	L1-13	7	33	L1	7	0	0
11/11/19	7055c700	L1-13	7	77	L1	7	0	0
11/12/19	7055c700	L1-13	7	36	L1	7	0	0
11/13/19	7055c700	L1-13	7	6	L1	7	0	0
11/14/19	7055c700	L1-13	7	47	L1	7	0	0
11/15/19	7055c700	L1-13	7	5	L1	7	0	0
11/16/19	7055c700	L1-13	7	5	L1	7	0	0
11/17/19	7055c700	L1-13	7	6	L1	7	0	0
11/18/19	7055c700	L1-13	7	6	L1	7	0	0
11/19/19	7055c700	L1-13	4	36	L1	7	3	0
11/20/19	7055c700	L1-13	7	4	L1	7	0	0
11/21/19	7055c700	L1-13	7	39	L1	7	0	0
11/22/19	7055c700	L1-13	7	6	L1	7	0	0
11/23/19	7055c700	L1-13	7	4	L1	7	0	0
11/24/19	7055c700	L1-13	7	4	L1	7	0	0
11/25/19	7055c700	L1-13	7	6	L1	7	0	0
11/26/19	7055c700	L1-13	7	6	L1	7	0	0
11/27/19	7055c700	L1-13	7	5	L1	7	0	0
11/28/19	7055c700	L1-13	7	9	L1	7	0	0
11/29/19	7055c700	L1-13	7	8	L1	7	0	0
11/30/19	7055c700	L1-13	7	7	L1	7	0	0
12/1/19	7055c700	L1-13	7	6	L1	7	0	0
12/2/19	7055c700	L1-13	7	7	L1	7	0	0
12/3/19	7055c700	L1-13	7	7	L1	7	0	0
12/4/19	7055c700	L1-13	7	7	L1	7	0	0
12/5/19	7055c700	L1-13	7	7	L1	7	0	0
12/6/19	7055c700	L1-13	7	7	L1	7	0	0
12/7/19	7055c700	L1-13	7	3	L1	7	0	0
12/8/19	7055c700	L1-13	7	13	L1	7	0	0
12/9/19	7055c700	L1-13	7	8	L1	7	0	0
12/10/19	7055c700	L1-13	7	10	L1	7	0	0
12/11/19	7055c700	L1-13	7	10	L1	7	0	0
12/12/19	7055c700	L1-13	7	10	L1	7	0	0
12/13/19	7055c700	L1-13	7	20	L1	7	0	0
12/14/19	7055c700	L1-13	7	10	L1	7	0	0
12/15/19	7055c700	L1-13	7	8	L1	7	0	0
12/16/19	7055c700	L1-13	7	6	L1	7	0	0
12/17/19	7055c700	L1-13	3	5	L1	7	4	0
12/18/19	7055c700	L1-13	7	13	L1	7	0	0
12/19/19	7055c700	L1-13	7	13	L1	7	0	0
12/20/19	7055c700	L1-13	7	9	L1	7	0	0
12/21/19	7055c700	L1-13	7	12	L1	7	0	0
12/22/19	7055c700	L1-13	7	12	L1	7	0	0
12/23/19	7055c700	L1-13	7	11	L1	7	0	0
12/24/19	7055c700	L1-13	7	10	L1	7	0	0
12/25/19	7055c700	L1-13	7	11	L1	7	0	0
12/26/19	7055c700	L1-13	7	10	L1	7	0	0
12/27/19	7055c700	L1-13	6	8	L1	7	1	0
12/28/19	7055c700	L1-13	7	31	L1	7	0	0
12/29/19	7055c700	L1-13	7	6	L1	7	0	0
12/30/19	7055c700	L1-13	7	6	L1	7	0	0
12/31/19	7055c700	L1-13	7	6	L1	7	0	0
1/1/20	7055c700	L1-13	7	6	L1	7	0	0
1/2/20	7055c700	L1-13	7	5	L1	7	0	0
1/3/20	7055c700	L1-13	4	7	L1	7	3	0
1/4/20	7055c700	L1-13	7	5	L1	7	0	0
1/5/20	7055c700	L1-13	7	86	L1	7	0	0
1/6/20	7055c700	L1-13	7	5	L1	7	0	0
1/7/20	7055c700	L1-13	7	13	L1	7	0	0
1/8/20	7055c700	L1-13	7	17	L1	7	0	0
1/9/20	7055c700	L1-13	7	53	L1	7	0	0
1/10/20	7055c700	L1-13	4	10	L1	7	3	0
1/13/20	7055c700	L1-13	4	55	L1	7	3	0
1/14/20	7055c700	L1-13	7	7	L1	7	0	0
1/15/20	7055c700	L1-13	7	52	L1	7	0	0
1/16/20	7055c700	L1-13	7	7	L1	7	0	0
1/17/20	7055c700	L1-13	5	3	L1	7	2	0
1/18/20	7055c700	L1-13	7	4	L1	7	0	0
1/19/20	7055c700	L1-13	7	2	L1	7	0	0
1/20/20	7055c700	L1-13	6	5	L1	7	1	0
1/21/20	7055c700	L1-13	7	7	L1	7	0	0
1/22/20	7055c700	L1-13	7	10	L1	7	0	0
1/23/20	7055c700	L1-13	7	9	L1	7	0	0
1/24/20	7055c700	L1-13	5	12	L1	7	2	0
8/30/19	5e8d5b00	L1-14	5	617	L1	7	2	0
8/31/19	5e8d5b00	L1-14	7	627	L1	7	0	0
9/1/19	5e8d5b00	L1-14	7	636	L1	7	0	0
9/2/19	5e8d5b00	L1-14	7	609	L1	7	0	0
9/3/19	5e8d5b00	L1-14	7	581	L1	7	0	0
9/4/19	5e8d5b00	L1-14	6	580	L1	7	1	0
9/5/19	5e8d5b00	L1-14	7	599	L1	7	0	0
9/6/19	5e8d5b00	L1-14	7	540	L1	7	0	0
9/7/19	5e8d5b00	L1-14	7	482	L1	7	0	0
9/8/19	5e8d5b00	L1-14	7	561	L1	7	0	0
9/9/19	5e8d5b00	L1-14	7	589	L1	7	0	0
9/10/19	5e8d5b00	L1-14	7	588	L1	7	0	0
9/11/19	5e8d5b00	L1-14	7	576	L1	7	0	0
9/12/19	5e8d5b00	L1-14	7	604	L1	7	0	0
9/13/19	5e8d5b00	L1-14	7	592	L1	7	0	0
9/14/19	5e8d5b00	L1-14	7	579	L1	7	0	0
9/15/19	5e8d5b00	L1-14	7	567	L1	7	0	0
9/16/19	5e8d5b00	L1-14	7	576	L1	7	0	0
9/17/19	5e8d5b00	L1-14	7	581	L1	7	0	0
9/18/19	5e8d5b00	L1-14	7	595	L1	7	0	0
9/19/19	5e8d5b00	L1-14	7	590	L1	7	0	0
9/20/19	5e8d5b00	L1-14	7	571	L1	7	0	0
9/21/19	5e8d5b00	L1-14	7	588	L1	7	0	0
9/22/19	5e8d5b00	L1-14	7	586	L1	7	0	0
9/23/19	5e8d5b00	L1-14	7	556	L1	7	0	0
9/24/19	5e8d5b00	L1-14	7	572	L1	7	0	0
9/25/19	5e8d5b00	L1-14	7	576	L1	7	0	0
9/26/19	5e8d5b00	L1-14	7	542	L1	7	0	0
9/27/19	5e8d5b00	L1-14	7	485	L1	7	0	0
9/29/19	5e8d5b00	L1-14	3	605	L1	7	4	0
9/30/19	5e8d5b00	L1-14	7	587	L1	7	0	0
10/1/19	5e8d5b00	L1-14	7	587	L1	7	0	0
10/2/19	5e8d5b00	L1-14	7	578	L1	7	0	0
10/3/19	5e8d5b00	L1-14	7	578	L1	7	0	0
10/4/19	5e8d5b00	L1-14	7	562	L1	7	0	0
10/5/19	5e8d5b00	L1-14	7	550	L1	7	0	0
10/6/19	5e8d5b00	L1-14	7	555	L1	7	0	0
10/7/19	5e8d5b00	L1-14	7	533	L1	7	0	0
10/8/19	5e8d5b00	L1-14	7	545	L1	7	0	0
[truncated: 7,468 more rows]
