# Supplementary material for: An automated feeding system for the African killifish reveals the impact of diet on lifespan and allows scalable assessment of associative learning
Source: eLife. 2022 Nov 10;11:e69008. doi: 10.7554/eLife.69008 (PMC9788828; doi:10.7554/eLife.69008)
Supplement: Figure 3—source data 1. [file elife-69008-fig3-data1.csv]

Number	Strain	Parents	HatchDate	Single2.8LHoused	PlacedFeeder	StartedFeedingRegime	BodyLength_pixel	pixels_10cm	BodyLength_cm	DeathDate	BodyLength_cm_1	Observed	FeedingScheme	Sex	Column16	Lifespan_days	Lifespan_weeks	GrowthRate
305	GRZ	GRZ	2019-04-12	4/22/19	4/24/19	4/24/19	252.655	834.6203333	3.027184816	2019-07-13	5.3	1	AL	m		92	14	0.37857142857142856
307	GRZ	GRZ	2019-04-12	4/22/19	4/24/19	4/24/19	207.48	834.6203333	2.485920744	2019-06-20	3.3	0	DR	f		69	10	0.32999999999999996
310	GRZ	GRZ	2019-04-17	4/22/19	4/24/19	4/24/19	160.481	834.6203333	1.922802424	2019-07-11	4.5	1	AL	f		85	13	0.34615384615384615
312	GRZ	GRZ	2019-04-17	4/22/19	4/24/19	4/24/19	198.232	834.6203333	2.375115871	2019-08-18	4.3	1	DR	f		123	18	0.23888888888888887
313	GRZ	GRZ	2019-04-17	4/22/19	4/24/19	4/24/19	227.271	834.6203333	2.723046527	2019-08-01	5.7	1	AL	m		106	16	0.35625
315	GRZ	GRZ	2019-04-12	4/22/19	4/24/19	4/24/19	258.588	834.6203333	3.09827103	2019-10-06	6.0	1	AL	m		177	26	0.23076923076923078
316	GRZ	GRZ	2019-04-12	4/22/19	4/24/19	4/24/19	269.666	834.6203333	3.23100204	2019-08-09	6.1	1	AL	m		119	17	0.3588235294117647
320	GRZ	GRZ	2019-04-12	4/22/19	4/24/19	4/24/19	254.951	834.6203333	3.05469433	2019-08-16	5.6	1	AL	m		126	18	0.3111111111111111
322	GRZ	GRZ	2019-04-12	4/22/19	4/24/19	4/24/19	274.659	834.6203333	3.290825649	2019-06-24	4.5	1	AL	f		73	11	0.4090909090909091
325	GRZ	GRZ	2019-04-17	4/22/19	4/24/19	4/24/19	181.962	834.6203333	2.180176935	2019-08-11	5.0	1	AL	f		116	17	0.29411764705882354
331	GRZ	GRZ	2019-04-12	4/22/19	4/24/19	4/24/19	302.323	834.6203333	3.622281748	2019-07-24	6.0	1	AL	m		103	15	0.4
332	GRZ	GRZ	2019-04-12	4/22/19	4/24/19	4/24/19	254.286	834.6203333	3.046726635	2019-08-12	5.2	1	DR	m		122	18	0.2888888888888889
333	GRZ	GRZ	2019-04-05	4/22/19	4/24/19	4/24/19	252.284	834.6203333	3.022739681	2019-08-12	6.4	1	AL	m		129	19	0.3368421052631579
334	GRZ	GRZ	2019-04-17	4/22/19	4/24/19	4/24/19	180.4	834.6203333	2.161461838	2019-08-25	4.3	1	DR	f		130	19	0.2263157894736842
335	GRZ	GRZ	2019-04-12	4/22/19	4/24/19	4/24/19	247.952	834.6203333	2.970835841	2019-07-31	4.7	1	DR	m		110	16	0.29375
336	GRZ	GRZ	2019-04-12	4/22/19	4/24/19	4/24/19	234.0	834.6203333	2.803670012	2019-07-07	4.8	1	AL	f		86	13	0.3692307692307692
337	GRZ	GRZ	2019-04-12	4/22/19	4/24/19	4/24/19	155.242	834.6203333	1.860031368	2019-07-05	3.4	1	DR	f		84	12	0.2833333333333333
340	GRZ	GRZ	2019-04-12	4/22/19	4/24/19	4/24/19	223.672	834.6203333	2.679925124	2019-07-24	4.0	1	DR	f		103	15	0.26666666666666666
342	GRZ	GRZ	2019-04-12	4/22/19	4/24/19	4/24/19	234.39	834.6203333	2.808342795	2019-11-12	5.3	1	DR	m		214	31	0.17096774193548386
343	GRZ	GRZ	2019-04-12	4/22/19	4/24/19	4/24/19	247.431	834.6203333	2.964593482	2019-08-16	5.0	1	AL	f		126	18	0.2777777777777778
345	GRZ	GRZ	2019-04-17	4/22/19	4/24/19	4/24/19	208.096	834.6203333	2.493301345	2019-07-13	4.6	1	AL	f		87	13	0.3538461538461538
346	GRZ	GRZ	2019-04-17	4/22/19	4/24/19	4/24/19	239.24	834.6203333	2.86645305	2019-07-28	5.5	1	AL	m		102	15	0.36666666666666664
347	GRZ	GRZ	2019-04-17	4/22/19	4/24/19	4/24/19	214.946	834.6203333	2.575374591	2019-08-15	3.4	1	DR	f		120	18	0.18888888888888888
348	GRZ	GRZ	2019-04-17	4/22/19	4/24/19	4/24/19	188.383	834.6203333	2.257110119	2019-07-20	3.8	1	DR	f		94	14	0.2714285714285714
349	GRZ	GRZ	2019-04-17	4/22/19	4/24/19	4/24/19	210.618	834.6203333	2.523518678	2019-07-25	3.5	1	DR	f		99	15	0.23333333333333334
350	GRZ	GRZ	2019-04-17	4/22/19	4/24/19	4/24/19	245.957	834.6203333	2.946932757	2019-09-16	5.2	1	DR	m		152	22	0.23636363636363636
354	GRZ	GRZ	2019-04-17	4/22/19	4/24/19	4/24/19	178.941	834.6203333	2.143980836	2019-07-24	4.2	1	DR	f		98	14	0.3
357	GRZ	GRZ	2019-04-12	4/22/19	4/24/19	4/24/19	206.155	834.6203333	2.470045262	2019-09-18	4.0	1	DR	f		159	23	0.17391304347826086
361	GRZ	GRZ	2019-04-17	4/22/19	4/24/19	4/24/19	202.99	834.6203333	2.432123828	2019-08-18	5.0	1	AL	f		123	18	0.2777777777777778
362	GRZ	GRZ	2019-04-12	4/22/19	4/24/19	4/24/19	233.942	834.6203333	2.802975085	2019-07-10	4.7	1	AL	f		89	13	0.36153846153846153
364	GRZ	GRZ	2019-04-17	4/22/19	4/24/19	4/24/19	231.944	834.6203333	2.779036057	2019-08-15	4.6	1	AL	f		120	18	0.25555555555555554
366	GRZ	GRZ	2019-04-17	4/22/19	4/24/19	4/24/19	202.221	834.6203333	2.422910058	2019-07-25	5.0	1	AL	f		99	15	0.3333333333333333
367	GRZ	GRZ	2019-04-17	4/22/19	4/24/19	4/24/19	282.028	834.6203333	3.379117291	2019-09-14	5.9	1	AL	m		150	22	0.2681818181818182
368	GRZ	GRZ	2019-04-17	4/22/19	4/24/19	4/24/19	219.572	834.6203333	2.630800991	2019-06-25	4.0	1	DR	f		69	10	0.4
369	GRZ	GRZ	2019-04-17	4/22/19	4/24/19	4/24/19	290.379	834.6203333	3.479174762	2019-06-30	5.1	1	AL	m		74	11	0.4636363636363636
370	GRZ	GRZ	2019-04-17	4/22/19	4/24/19	4/24/19	237.226	834.6203333	2.842322317	2019-09-02	4.7	1	DR	m		138	20	0.23500000000000001
371	GRZ	GRZ	2019-04-17	4/22/19	4/24/19	4/24/19	264.544	834.6203333	3.169632819	2019-08-20	6.0	1	AL	m		125	18	0.3333333333333333
373	GRZ	GRZ	2019-04-17	4/22/19	4/24/19	4/24/19	249.218	834.6203333	2.986004415	2019-08-28	4.9	1	AL	f		133	19	0.2578947368421053
375	GRZ	GRZ	2019-04-17	4/22/19	4/24/19	4/24/19	214.457	834.6203333	2.56951564	2019-09-12	6.1	1	AL	m		148	22	0.2772727272727273
378	GRZ	GRZ	2019-04-17	4/22/19	4/24/19	4/24/19	214.067	834.6203333	2.564842857	2019-07-27	3.2	0	DR	f		101	15	0.21333333333333335
379	GRZ	GRZ	2019-04-17	4/22/19	4/24/19	4/24/19	240.438	834.6203333	2.880806882	2019-07-31	4.0	1	DR	f		105	15	0.26666666666666666
380	GRZ	GRZ	2019-04-17	4/22/19	4/24/19	4/24/19	252.334	834.6203333	3.023338756	2019-09-27	5.5	1	AL	m		163	24	0.22916666666666666
381	GRZ	GRZ	2019-04-17	4/22/19	4/24/19	4/24/19	285.727	834.6203333	3.423436844	2019-08-24	4.8	1	DR	m		129	19	0.25263157894736843
383	GRZ	GRZ	2019-04-17	4/22/19	4/24/19	4/24/19	271.035	834.6203333	3.247404708	2019-09-16	5.3	1	DR	m		152	22	0.2409090909090909
384	GRZ	GRZ	2019-04-17	4/22/19	4/24/19	4/24/19	184.792	834.6203333	2.214084568	2019-08-04	4.5	1	AL	f		109	16	0.28125
385	GRZ	GRZ	2019-04-17	4/22/19	4/24/19	4/24/19	191.299	834.6203333	2.292048161	2019-08-18	4.5	1	DR	f		123	18	0.25
386	GRZ	GRZ	2019-04-12	4/22/19	4/24/19	4/24/19	270.74	834.6203333	3.243870167	2019-08-30	5.0	1	DR	m		140	20	0.25
387	GRZ	GRZ	2019-04-12	4/22/19	4/24/19	4/24/19	266.506	834.6203333	3.193140514	2019-06-22	4.9	1	AL	m		71	11	0.4454545454545455
390	GRZ	GRZ	2019-04-12	4/22/19	4/24/19	4/24/19	228.302	834.6203333	2.735399449	2019-07-22	4.8	1	DR	m		101	15	0.32
391	GRZ	GRZ	2019-04-12	4/22/19	4/24/19	4/24/19	247.46	834.6203333	2.964940945	2019-08-10	6.1	1	AL	m		120	18	0.33888888888888885
392	GRZ	GRZ	2019-04-17	4/22/19	4/24/19	4/24/19	240.194	834.6203333	2.877883397	2019-08-29	5.7	1	AL	m		134	20	0.28500000000000003
393	GRZ	GRZ	2019-04-17	4/22/19	4/24/19	4/24/19	220.675	834.6203333	2.644016581	2019-08-11	5.1	1	DR	m		116	17	0.3
395	GRZ	GRZ	2019-04-17	4/22/19	4/24/19	4/24/19	198.073	834.6203333	2.373210813	2019-08-31	4.1	1	DR	f		136	20	0.205
397	GRZ	GRZ	2019-04-17	4/22/19	4/24/19	4/24/19	223.266	834.6203333	2.675060636	2019-09-09	5.4	1	DR	m		145	21	0.2571428571428572
398	GRZ	GRZ	2019-04-17	4/22/19	4/24/19	4/24/19	266.365	834.6203333	3.191451123	2019-09-14	4.9	1	DR	m		150	22	0.22272727272727275
402	GRZ	GRZ	2019-04-12	4/22/19	4/24/19	4/24/19	250.57	834.6203333	3.002203397	2019-09-13	6.2	1	AL	m		154	22	0.2818181818181818
