# Supplementary material for: An automated feeding system for the African killifish reveals the impact of diet on lifespan and allows scalable assessment of associative learning
Source: eLife. 2022 Nov 10;11:e69008. doi: 10.7554/eLife.69008 (PMC9788828; doi:10.7554/eLife.69008)
Supplement: Figure 3—source data 2. [file elife-69008-fig3-data2.csv]

Pair	Crossed	Uncrossed	TotalEmbryosHarvested	LiveEmbryosHarvestedDay0	LiveEmbryosHarvestedDay2
1	6/29/20	6/30/20	4	3	3
2	6/29/20	6/30/20	22	7	5
3	6/29/20	6/30/20	5	0	0
4	6/29/20	6/30/20	23	15	10
5	6/29/20	6/30/20	1	0	0
6	6/29/20	6/30/20	3	0	0
7	6/29/20	6/30/20	6	4	3
8	6/29/20	6/30/20	0	0	0
9	6/29/20	6/30/20	6	6	3
10	6/29/20	6/30/20	0	0	0
1	7/6/20	7/7/20	4	0	0
2	7/6/20	7/7/20	14	12	11
3	7/6/20	7/7/20	7	7	4
4	7/6/20	7/7/20	11	5	0
5	7/6/20	7/7/20	0	0	0
6	7/6/20	7/7/20	4	0	0
7	7/6/20	7/7/20	3	2	1
8	7/6/20	7/7/20	8	5	1
9	7/6/20	7/7/20	24	13	12
10	7/6/20	7/7/20	1	1	1
1	7/14/20	7/15/20	6	3	2
2	7/14/20	7/15/20	15	4	4
3	7/14/20	7/15/20	12	5	3
4	7/14/20	7/15/20	6	3	2
5	7/14/20	7/15/20	1	0	0
6	7/14/20	7/15/20	4	2	1
7	7/14/20	7/15/20	0	0	0
8	7/14/20	7/15/20	0	0	0
9	7/14/20	7/15/20	20	14	9
10	7/14/20	7/15/20	1	1	0
1	7/20/20	7/21/20	13	4	4
2	7/20/20	7/21/20	27	6	6
3	7/20/20	7/21/20	3	1	1
4	7/20/20	7/21/20	5	1	1
5	7/20/20	7/21/20	1	1	1
6	7/20/20	7/21/20	2	0	0
7	7/20/20	7/21/20	8	2	2
8	7/20/20	7/21/20	4	2	0
9	7/20/20	7/21/20	43	35	31
10	7/20/20	7/21/20	4	2	1
1	7/27/20	7/28/20	11	2	2
2	7/27/20	7/28/20	32	11	10
3	7/27/20	7/28/20	7	3	2
4	7/27/20	7/28/20	9	5	5
5	7/27/20	7/28/20	0	0	0
6	7/27/20	7/28/20	0	0	0
7	7/27/20	7/28/20	0	0	0
8	7/27/20	7/28/20	7	2	1
9	7/27/20	7/28/20	44	35	33
10	7/27/20	7/28/20	0	0	0
1	8/3/20	8/4/20	20	3	3
2	8/3/20	8/4/20	36	16	16
3	8/3/20	8/4/20	9	6	6
4	8/3/20	8/4/20	4	0	0
5	8/3/20	8/4/20	0	0	0
6	8/3/20	8/4/20	3	1	1
7	8/3/20	8/4/20	10	9	9
8	8/3/20	8/4/20	19	8	8
9	8/3/20	8/4/20	51	47	47
10	8/3/20	8/4/20	3	1	1
