# Supplementary material for: An automated feeding system for the African killifish reveals the impact of diet on lifespan and allows scalable assessment of associative learning
Source: eLife. 2022 Nov 10;11:e69008. doi: 10.7554/eLife.69008 (PMC9788828; doi:10.7554/eLife.69008)
Supplement: Figure 3—source data 6. [file elife-69008-fig3-data6.csv]

Number	Pair	Sex	HatchDate	FeedingScheme	Feeder	DOI	Observed	Remove
410	NA	m	5/23/19	7times/AL	ccf28900	9/26/19	1
411	1	m	5/23/19	12times/OF	bc8d1d00	9/23/19	1
412	2	m	5/23/19	7times/AL	c9931c00	9/8/19	1
413	3	m	5/23/19	7times/AL	60654700	10/23/19	1
414	4	m	5/23/19	manual	manual	10/5/19	1
415	5	m	5/23/19	12times/OF	1d6a4700
416	6	m	5/23/19	manual	manual	10/30/19	1
417	7	m	5/23/19	7times/AL	a3684700	9/26/19	1
418	8	m	5/23/19	12times/OF	1f6a4700	10/21/19	1
419	9	m	5/23/19	manual	manual	10/22/19	1
420	10	m	5/23/19	manual	manual	10/13/19	1
421	11	m	5/23/19	12times/OF	7f6a4700	9/10/19	1
422	NA	m	5/23/19	manual	manual	9/12/19	1
423	1	f	5/23/19	12times/OF	11fc2100	8/13/19	1	TRUE
424	2	f	5/23/19	7times/AL	36684700	7/30/19	1
425	3	f	5/23/19	7times/AL	caf18900	10/14/19	1
426	4	f	5/23/19	manual	manual	9/23/19	1
427	5	f	5/23/19	12times/OF	818f1d00	9/16/19	1
428	6	f	5/23/19	manual	manual	9/21/19	1
429	7	f	5/23/19	7times/AL	56644700	9/23/19	1
430	8	f	5/23/19	12times/OF	958b1d00	9/3/19	1
431	9	f	5/23/19	manual	manual	9/26/19	1
432	10	f	5/23/19	manual	manual	10/5/19	1
433	11	f	5/23/19	12times/OF	13961c00	9/9/19	1
