# Supplementary material for: An automated feeding system for the African killifish reveals the impact of diet on lifespan and allows scalable assessment of associative learning
Source: eLife. 2022 Nov 10;11:e69008. doi: 10.7554/eLife.69008 (PMC9788828; doi:10.7554/eLife.69008)
Supplement: Figure 4—source data 2. [file elife-69008-fig4-data2.csv]

Number	Strain	Parents	HatchDate	Single2.8LHoused	PlacedFeeder	StartedFeedingRegime	BodyLength_pixel	pixels_10cm	BodyLength_cm	DeathDate	BodyLength_cm	Observed	FeedingScheme	Sex
305	GRZ	GRZ	4/12/19	4/22/19	4/24/19	4/24/19	252.655	834.6203333	3.027184816	7/13/19	5.3	1	AL	m
307	GRZ	GRZ	4/12/19	4/22/19	4/24/19	4/24/19	207.48	834.6203333	2.485920744	6/20/19	3.3	0	DR	f
308	GRZ	GRZ	4/17/19	4/22/19	4/24/19	4/24/19	257.013	834.6203333	3.079400174	10/4/19		1	AL	m
310	GRZ	GRZ	4/17/19	4/22/19	4/24/19	4/24/19	160.481	834.6203333	1.922802424	7/11/19	4.5	1	AL	f
312	GRZ	GRZ	4/17/19	4/22/19	4/24/19	4/24/19	198.232	834.6203333	2.375115871	8/18/19	4.3	1	DR	f
313	GRZ	GRZ	4/17/19	4/22/19	4/24/19	4/24/19	227.271	834.6203333	2.723046527	8/1/19	5.7	1	AL	m
315	GRZ	GRZ	4/12/19	4/22/19	4/24/19	4/24/19	258.588	834.6203333	3.09827103	10/6/19	6	1	AL	m
316	GRZ	GRZ	4/12/19	4/22/19	4/24/19	4/24/19	269.666	834.6203333	3.23100204	8/9/19	6.1	1	AL	m
317	GRZ	GRZ	4/12/19	4/22/19	4/24/19	4/24/19	240.596	834.6203333	2.882699958	6/14/19		0	AL	m
319	GRZ	GRZ	4/12/19	4/22/19	4/24/19	4/24/19	307.54	834.6203333	3.684789212	6/16/19		0	DR	m
320	GRZ	GRZ	4/12/19	4/22/19	4/24/19	4/24/19	254.951	834.6203333	3.05469433	8/16/19	5.6	1	AL	m
322	GRZ	GRZ	4/12/19	4/22/19	4/24/19	4/24/19	274.659	834.6203333	3.290825649	6/24/19	4.5	1	AL	f
324	GRZ	GRZ	4/12/19	4/22/19	4/24/19	4/24/19	243.953	834.6203333	2.92292184	4/20/20		1	DR	m
325	GRZ	GRZ	4/17/19	4/22/19	4/24/19	4/24/19	181.962	834.6203333	2.180176935	8/11/19	5	1	AL	f
329	GRZ	GRZ	4/12/19	4/22/19	4/24/19	4/24/19	259.754	834.6203333	3.112241454	6/17/19		0	AL	f
330	GRZ	GRZ	4/12/19	4/22/19	4/24/19	4/24/19	192.511	834.6203333	2.306569734	6/12/19		0	DR	f
331	GRZ	GRZ	4/12/19	4/22/19	4/24/19	4/24/19	302.323	834.6203333	3.622281748	7/24/19	6	1	AL	m
332	GRZ	GRZ	4/12/19	4/22/19	4/24/19	4/24/19	254.286	834.6203333	3.046726635	8/12/19	5.2	1	DR	m
334	GRZ	GRZ	4/17/19	4/22/19	4/24/19	4/24/19	180.4	834.6203333	2.161461838	8/25/19	4.3	1	DR	f
335	GRZ	GRZ	4/12/19	4/22/19	4/24/19	4/24/19	247.952	834.6203333	2.970835841	7/31/19	4.7	1	DR	m
336	GRZ	GRZ	4/12/19	4/22/19	4/24/19	4/24/19	234	834.6203333	2.803670012	7/7/19	4.8	1	AL	f
337	GRZ	GRZ	4/12/19	4/22/19	4/24/19	4/24/19	155.242	834.6203333	1.860031368	7/5/19	3.4	1	DR	f
340	GRZ	GRZ	4/12/19	4/22/19	4/24/19	4/24/19	223.672	834.6203333	2.679925124	7/24/19	4	1	DR	f
342	GRZ	GRZ	4/12/19	4/22/19	4/24/19	4/24/19	234.39	834.6203333	2.808342795	11/12/19	5.3	1	DR	m
343	GRZ	GRZ	4/12/19	4/22/19	4/24/19	4/24/19	247.431	834.6203333	2.964593482	8/16/19	5	1	AL	f
344	GRZ	GRZ	4/17/19	4/22/19	4/24/19	4/24/19	166.28	834.6203333	1.992283118	6/15/19		0	DR	f
345	GRZ	GRZ	4/17/19	4/22/19	4/24/19	4/24/19	208.096	834.6203333	2.493301345	7/13/19	4.6	1	AL	f
346	GRZ	GRZ	4/17/19	4/22/19	4/24/19	4/24/19	239.24	834.6203333	2.86645305	7/28/19	5.5	1	AL	m
347	GRZ	GRZ	4/17/19	4/22/19	4/24/19	4/24/19	214.946	834.6203333	2.575374591	8/15/19	3.4	1	DR	f
348	GRZ	GRZ	4/17/19	4/22/19	4/24/19	4/24/19	188.383	834.6203333	2.257110119	7/20/19	3.8	1	DR	f
349	GRZ	GRZ	4/17/19	4/22/19	4/24/19	4/24/19	210.618	834.6203333	2.523518678	7/25/19	3.5	1	DR	f
350	GRZ	GRZ	4/17/19	4/22/19	4/24/19	4/24/19	245.957	834.6203333	2.946932757	9/16/19	5.2	1	DR	m
352	GRZ	GRZ	4/17/19	4/22/19	4/24/19	4/24/19	226.039	834.6203333	2.708285324	12/29/19		1	AL	m
353	GRZ	GRZ	4/17/19	4/22/19	4/24/19	4/24/19	246.641	834.6203333	2.9551281	6/16/19		0	AL	m
354	GRZ	GRZ	4/17/19	4/22/19	4/24/19	4/24/19	178.941	834.6203333	2.143980836	7/24/19	4.2	1	DR	f
357	GRZ	GRZ	4/12/19	4/22/19	4/24/19	4/24/19	206.155	834.6203333	2.470045262	9/18/19	4	1	DR	f
361	GRZ	GRZ	4/17/19	4/22/19	4/24/19	4/24/19	202.99	834.6203333	2.432123828	8/18/19	5	1	AL	f
362	GRZ	GRZ	4/12/19	4/22/19	4/24/19	4/24/19	233.942	834.6203333	2.802975085	7/10/19	4.7	1	AL	f
364	GRZ	GRZ	4/17/19	4/22/19	4/24/19	4/24/19	231.944	834.6203333	2.779036057	8/15/19	4.6	1	AL	f
366	GRZ	GRZ	4/17/19	4/22/19	4/24/19	4/24/19	202.221	834.6203333	2.422910058	7/25/19	5	1	AL	f
367	GRZ	GRZ	4/17/19	4/22/19	4/24/19	4/24/19	282.028	834.6203333	3.379117291	9/14/19	5.9	1	AL	m
368	GRZ	GRZ	4/17/19	4/22/19	4/24/19	4/24/19	219.572	834.6203333	2.630800991	6/25/19	4	1	DR	f
369	GRZ	GRZ	4/17/19	4/22/19	4/24/19	4/24/19	290.379	834.6203333	3.479174762	6/30/19	5.1	1	AL	m
370	GRZ	GRZ	4/17/19	4/22/19	4/24/19	4/24/19	237.226	834.6203333	2.842322317	9/2/19	4.7	1	DR	m
371	GRZ	GRZ	4/17/19	4/22/19	4/24/19	4/24/19	264.544	834.6203333	3.169632819	8/20/19	6	1	AL	m
372	GRZ	GRZ	4/17/19	4/22/19	4/24/19	4/24/19	284.549	834.6203333	3.409322642	5/29/20		1	DR	m
373	GRZ	GRZ	4/17/19	4/22/19	4/24/19	4/24/19	249.218	834.6203333	2.986004415	8/28/19	4.9	1	AL	f
375	GRZ	GRZ	4/17/19	4/22/19	4/24/19	4/24/19	214.457	834.6203333	2.56951564	9/12/19	6.1	1	AL	m
378	GRZ	GRZ	4/17/19	4/22/19	4/24/19	4/24/19	214.067	834.6203333	2.564842857	7/27/19	3.2	0	DR	f
379	GRZ	GRZ	4/17/19	4/22/19	4/24/19	4/24/19	240.438	834.6203333	2.880806882	7/31/19	4	1	DR	f
380	GRZ	GRZ	4/17/19	4/22/19	4/24/19	4/24/19	252.334	834.6203333	3.023338756	9/27/19	5.5	1	AL	m
381	GRZ	GRZ	4/17/19	4/22/19	4/24/19	4/24/19	285.727	834.6203333	3.423436844	8/24/19	4.8	1	DR	m
382	GRZ	GRZ	4/17/19	4/22/19	4/24/19	4/24/19	206.814	834.6203333	2.477941068	6/11/19		0	DR	f
383	GRZ	GRZ	4/17/19	4/22/19	4/24/19	4/24/19	271.035	834.6203333	3.247404708	9/16/19	5.3	1	DR	m
384	GRZ	GRZ	4/17/19	4/22/19	4/24/19	4/24/19	184.792	834.6203333	2.214084568	8/4/19	4.5	1	AL	f
385	GRZ	GRZ	4/17/19	4/22/19	4/24/19	4/24/19	191.299	834.6203333	2.292048161	8/18/19	4.5	1	DR	f
386	GRZ	GRZ	4/12/19	4/22/19	4/24/19	4/24/19	270.74	834.6203333	3.243870167	8/30/19	5	1	DR	m
387	GRZ	GRZ	4/12/19	4/22/19	4/24/19	4/24/19	266.506	834.6203333	3.193140514	6/22/19	4.9	1	AL	m
388	GRZ	GRZ	4/12/19	4/22/19	4/24/19	4/24/19	212.735	834.6203333	2.548883504	6/14/19		0	AL	f
390	GRZ	GRZ	4/12/19	4/22/19	4/24/19	4/24/19	228.302	834.6203333	2.735399449	7/22/19	4.8	1	DR	m
391	GRZ	GRZ	4/12/19	4/22/19	4/24/19	4/24/19	247.46	834.6203333	2.964940945	8/10/19	6.1	1	AL	m
392	GRZ	GRZ	4/17/19	4/22/19	4/24/19	4/24/19	240.194	834.6203333	2.877883397	8/29/19	5.7	1	AL	m
393	GRZ	GRZ	4/17/19	4/22/19	4/24/19	4/24/19	220.675	834.6203333	2.644016581	8/11/19	5.1	1	DR	m
395	GRZ	GRZ	4/17/19	4/22/19	4/24/19	4/24/19	198.073	834.6203333	2.373210813	8/31/19	4.1	1	DR	f
397	GRZ	GRZ	4/17/19	4/22/19	4/24/19	4/24/19	223.266	834.6203333	2.675060636	9/9/19	5.4	1	DR	m
398	GRZ	GRZ	4/17/19	4/22/19	4/24/19	4/24/19	266.365	834.6203333	3.191451123	9/14/19	4.9	1	DR	m
400	GRZ	GRZ	4/17/19	4/22/19	4/24/19	4/24/19	192.094	834.6203333	2.30157345	6/15/19		0	AL	m
402	GRZ	GRZ	4/12/19	4/22/19	4/24/19	4/24/19	250.57	834.6203333	3.002203397	9/13/19	6.2	1	AL	m
