# Supplementary material for: An automated feeding system for the African killifish reveals the impact of diet on lifespan and allows scalable assessment of associative learning
Source: eLife. 2022 Nov 10;11:e69008. doi: 10.7554/eLife.69008 (PMC9788828; doi:10.7554/eLife.69008)
Supplement: Figure 4—source data 3. [file elife-69008-fig4-data3.xlsx]

## Sheet: Sheet1
Results from Cox proportional hazards model
Survival ~ FeedingScheme + HatchDate + Sex + Sex:FeedingScheme
	coef	exp(coef)	se(coef)	z	Pr(>|z|)	Significance levels
DR feeding	-1.0012	0.3674	0.3551	-2.819	0.00482	**
Female	0.3591	1.432	0.3253	1.104	0.26969
DR feeding & female	0.9736	2.6474	0.4867	2	0.04545	*
