# Supplementary material for: An automated feeding system for the African killifish reveals the impact of diet on lifespan and allows scalable assessment of associative learning
Source: eLife. 2022 Nov 10;11:e69008. doi: 10.7554/eLife.69008 (PMC9788828; doi:10.7554/eLife.69008)
Supplement: Figure 5—source data 1. [file elife-69008-fig5-data1.xlsx]

## Sheet: ALDR_RNAseq AnimalInfo
AnimalID	Sex	CollectionDate	CocoDate	HatchDate	PlacedIn2.8L	Age at Upgrade (days)	Condition	Age at Harvest (days)	HarvestDate	Harvesters
DR5_AL	f	2021-10-21	2021-11-04	2021-11-18	2021-12-18	30	AL	66	2022-01-23	EKC/AM
DR9_AL	f	2021-10-21	2021-11-04	2021-11-18	2021-12-18	30	AL	66	2022-01-23	EKC/AM
DR20_AL	f	2021-10-21	2021-11-04	2021-11-18	2021-12-18	30	AL	65	2022-01-22	JC/EKC
DR34_AL	f	2021-10-21	2021-11-04	2021-11-18	2021-12-18	30	AL	65	2022-01-22	JC/EKC
DR17_DR	f	2021-10-21	2021-11-04	2021-11-18	2021-12-18	30	DR	66	2022-01-23	EKC/AM
DR19_DR	f	2021-10-21	2021-11-04	2021-11-18	2021-12-18	30	DR	66	2022-01-23	EKC/AM
DR15_DR	f	2021-10-21	2021-11-04	2021-11-18	2021-12-18	30	DR	65	2022-01-22	JC/EKC
DR2_DR	f	2021-10-21	2021-11-04	2021-11-18	2021-12-18	30	DR	65	2022-01-22	JC/EKC
DR18_AL	m	2021-10-21	2021-11-04	2021-11-18	2021-12-18	30	AL	66	2022-01-23	EKC/AM
DR28_AL	m	2021-10-21	2021-11-04	2021-11-18	2021-12-18	30	AL	66	2022-01-23	EKC/AM
DR32_AL	m	2021-10-21	2021-11-04	2021-11-18	2021-12-18	30	AL	65	2022-01-22	JC/EKC
DR4_AL	m	2021-10-21	2021-11-04	2021-11-18	2021-12-18	30	AL	65	2022-01-22	JC/EKC
DR35_DR	m	2021-10-21	2021-11-04	2021-11-18	2021-12-18	30	DR	66	2022-01-23	EKC/AM
DR7_DR	m	2021-10-21	2021-11-04	2021-11-18	2021-12-18	30	DR	66	2022-01-23	EKC/AM
DR16_DR	m	2021-10-21	2021-11-04	2021-11-18	2021-12-18	30	DR	65	2022-01-22	JC/EKC
DR31_DR	m	2021-10-21	2021-11-04	2021-11-18	2021-12-18	30	DR	65	2022-01-22	JC/EKC

## Sheet: ALDR_RNAseq LibInfo
lib	condition	animal	sex	feeding	tissue	animal_tissue	RNA_ID	RNA Extraction Date	RNA Extractor	harvest_batch	cDNA_library_batch	sequencing_batch	filename
EC1	DR20_AL_L_f	DR20	f	AL	L	DR20_AL_L	EC1	2022-01-28	EC	2022-01-22	1	2	EC1_CKDL220004047-1a_HK53TDSX3_L1_UniquelyMapped.bam
EC10	DR28_AL_L_m	DR28	m	AL	L	DR28_AL_L	EC10	2022-01-28	EC	2022-01-23	1	2	EC10_CKDL220004056-1a_HK53TDSX3_L2_UniquelyMapped.bam
EC13	DR9_AL_BR_f	DR9	f	AL	BR	DR9_AL_BR	EC13	2022-01-28	EC	2022-01-23	2	2	EC13_CKDL220004059-1a_HK53TDSX3_L2_UniquelyMapped.bam
EC14	DR7_DR_L_m	DR7	m	DR	L	DR7_DR_L	EC14	2022-01-28	EC	2022-01-23	1	1	EC14_CKDL220004060-1a_HG5LMDSX3_L1_UniquelyMapped.bam
EC17	DR17_DR_BR_f	DR17	f	DR	BR	DR17_DR_BR	EC17	2022-01-31	EC	2022-01-23	2	1	EC17_CKDL220004063-1a_HG5LMDSX3_L1_UniquelyMapped.bam
EC18	DR5_AL_L_f	DR5	f	AL	L	DR5_AL_L	EC18	2022-01-31	EC	2022-01-23	2	1	EC18_CKDL220004064-1a_HG5LMDSX3_L1_UniquelyMapped.bam
EC20	DR15_DR_L_f	DR15	f	DR	L	DR15_DR_L	EC20	2022-01-31	EC	2022-01-22	1	1	EC20_CKDL220004066-1a_HG5LMDSX3_L1_UniquelyMapped.bam
EC21	DR20_AL_BR_f	DR20	f	AL	BR	DR20_AL_BR	EC21	2022-01-31	EC	2022-01-22	1	1	EC21_CKDL220004067-1a_HG5LMDSX3_L1_UniquelyMapped.bam
EC22	DR28_AL_BR_m	DR28	m	AL	BR	DR28_AL_BR	EC22	2022-01-31	EC	2022-01-23	1	1	EC22_CKDL220004068-1a_HG5LMDSX3_L1_UniquelyMapped.bam
EC24	DR31_DR_BR_m	DR31	m	DR	BR	DR31_DR_BR	EC24	2022-01-31	EC	2022-01-22	2	1	EC24_CKDL220004070-1a_HG5LMDSX3_L1_UniquelyMapped.bam
EC25	DR32_AL_L_m	DR32	m	AL	L	DR32_AL_L	EC25	2022-01-31	EC	2022-01-22	1	1	EC25_CKDL220004071-1a_HG5LMDSX3_L1_UniquelyMapped.bam
EC28	DR16_DR_L_m	DR16	m	DR	L	DR16_DR_L	EC28	2022-01-31	EC	2022-01-22	1	1	EC28_CKDL220004074-1a_HG5LMDSX3_L1_UniquelyMapped.bam
EC3	DR16_DR_BR_m	DR16	m	DR	BR	DR16_DR_BR	EC3	2022-01-28	EC	2022-01-22	1	2	EC3_CKDL220004049-1a_HK53TDSX3_L2_UniquelyMapped.bam
EC6	DR18_AL_BR_m	DR18	m	AL	BR	DR18_AL_BR	EC6	2022-01-28	EC	2022-01-23	1	2	EC6_CKDL220004052-1a_HK53TDSX3_L2_UniquelyMapped.bam
EC7	DR2_DR_BR_f	DR2	f	DR	BR	DR2_DR_BR	EC7	2022-01-28	EC	2022-01-22	1	2	EC7_CKDL220004053-1a_HK53TDSX3_L2_UniquelyMapped.bam
EC8	DR17_DR_L_f	DR17	f	DR	L	DR17_DR_L	EC8	2022-01-28	EC	2022-01-23	1	2	EC8_CKDL220004054-1a_HK53TDSX3_L2_UniquelyMapped.bam
JC1	DR34_AL_L_f	DR34	f	AL	L	DR34_AL_L	JC1	2022-01-28	JC	2022-01-22	1	1	JC1_CKDL220004075-1a_HG5LMDSX3_L1_UniquelyMapped.bam
JC11	DR4_AL_BR_m	DR4	m	AL	BR	DR4_AL_BR	JC11	2022-01-28	JC	2022-01-22	2	1	JC11_CKDL220004085-1a_HG5LMDSX3_L1_UniquelyMapped.bam
JC12	DR5_AL_BR_f	DR5	f	AL	BR	DR5_AL_BR	JC12	2022-01-28	JC	2022-01-23	2	1	JC12_CKDL220004086-1a_HG5LMDSX3_L1_UniquelyMapped.bam
JC13	DR7_DR_BR_m	DR7	m	DR	BR	DR7_DR_BR	JC13	2022-01-28	JC	2022-01-23	2	1	JC13_CKDL220004087-1a_HG5LMDSX3_L1_UniquelyMapped.bam
JC14	DR35_DR_L_m	DR35	m	DR	L	DR35_DR_L	JC14	2022-01-28	JC	2022-01-23	2	1	JC14_CKDL220004088-1a_HG5LMDSX3_L1_UniquelyMapped.bam
JC15	DR15_DR_BR_f	DR15	f	DR	BR	DR15_DR_BR	JC15	2022-01-31	JC	2022-01-22	1	1	JC15_CKDL220004089-1a_HG5LMDSX3_L1_UniquelyMapped.bam
JC18	DR9_AL_L_f	DR9	f	AL	L	DR9_AL_L	JC18	2022-01-31	JC	2022-01-23	1	1	JC18_CKDL220004092-1a_HG5LMDSX3_L1_UniquelyMapped.bam
JC20	DR19_DR_L_f	DR19	f	DR	L	DR19_DR_L	JC20	2022-01-31	JC	2022-01-23	2	1	JC20_CKDL220004094-1a_HG5LMDSX3_L1_UniquelyMapped.bam
JC21	DR18_AL_L_m	DR18	m	AL	L	DR18_AL_L	JC21	2022-01-31	JC	2022-01-23	2	1	JC21_CKDL220004095-1a_HG5LMDSX3_L1_UniquelyMapped.bam
JC23	DR32_AL_BR_m	DR32	m	AL	BR	DR32_AL_BR	JC23	2022-01-31	JC	2022-01-22	2	1	JC23_CKDL220004097-1a_HG5LMDSX3_L1_UniquelyMapped.bam
JC25	DR34_AL_BR_f	DR34	f	AL	BR	DR34_AL_BR	JC25	2022-01-31	JC	2022-01-22	2	1	JC25_CKDL220004099-1a_HG5LMDSX3_L1_UniquelyMapped.bam
JC27	DR35_DR_BR_m	DR35	m	DR	BR	DR35_DR_BR	JC27	2022-01-31	JC	2022-01-23	2	1	JC27_CKDL220004101-1a_HG5LMDSX3_L1_UniquelyMapped.bam
JC28	DR31_DR_L_m	DR31	m	DR	L	DR31_DR_L	JC28	2022-01-31	JC	2022-01-22	1	1	JC28_CKDL220004102-1a_HGC32DSX3_L2_UniquelyMapped.bam
JC5	DR19_DR_BR_f	DR19	f	DR	BR	DR19_DR_BR	JC5	2022-01-28	JC	2022-01-23	1	1	JC5_CKDL220004079-1a_HG5LMDSX3_L1_UniquelyMapped.bam
JC6	DR2_DR_L_f	DR2	f	DR	L	DR2_DR_L	JC6	2022-01-28	JC	2022-01-22	1	1	JC6_CKDL220004080-1a_HG5LMDSX3_L1_UniquelyMapped.bam
JC9	DR4_AL_L_m	DR4	m	AL	L	DR4_AL_L	JC9	2022-01-28	JC	2022-01-22	2	1	JC9_CKDL220004083-1a_HG5LMDSX3_L1_UniquelyMapped.bam
