# Supplementary material for: An automated feeding system for the African killifish reveals the impact of diet on lifespan and allows scalable assessment of associative learning
Source: eLife. 2022 Nov 10;11:e69008. doi: 10.7554/eLife.69008 (PMC9788828; doi:10.7554/eLife.69008)
Supplement: Figure 5—source data 4. [file elife-69008-fig5-data4.csv]

Gene	baseMean	log2FoldChange	lfcSE	stat	pvalue	padj
faah	2450.708418	4.282894025	0.196650993	21.77916295	3.66E-105	6.48E-101
LOC107389174	103510.6455	10.71526019	0.49539427	21.62976208	9.43E-104	8.36E-100
LOC107376379	6062.938673	-12.12407136	0.588776622	-20.59197141	3.24E-94	1.91E-90
LOC107390634	17821.57282	-11.47283825	0.606205514	-18.92565803	7.01E-80	3.11E-76
LOC107377840	789.1125732	6.955471403	0.380504679	18.27959495	1.20E-74	4.27E-71
LOC107373576	153978.0179	-13.26110787	0.739772641	-17.92592362	7.40E-72	2.19E-68
LOC107372943	2695818.06	-11.87805534	0.663055641	-17.91411549	9.15E-72	2.32E-68
LOC107380714	9293.045042	-11.71917924	0.664731674	-17.62993957	1.45E-69	3.22E-66
LOC107393232	6966.46678	5.358966128	0.309494851	17.31520286	3.61E-67	7.12E-64
LOC107392618	269812.779	-13.36603101	0.833681151	-16.03254553	7.57E-58	1.34E-54
LOC107376561	5089.121156	-9.704722484	0.632048393	-15.35439784	3.31E-53	5.34E-50
triqk	3809.361485	-3.374934083	0.224965512	-15.00200652	7.12E-51	1.05E-47
hpx	674451.0433	7.165568597	0.481837088	14.8713513	5.06E-50	6.90E-47
LOC107379845	10476.02221	-9.864493471	0.691935209	-14.25638317	4.09E-46	5.18E-43
LOC107395367	6360.702611	-8.003260214	0.563950496	-14.19142331	1.04E-45	1.22E-42
LOC107388898	2204857.966	-10.65352102	0.775361087	-13.74007698	5.84E-43	6.47E-40
LOC107373791	9049.274724	-5.443541567	0.403646611	-13.48590925	1.89E-41	1.97E-38
LOC107392619	1278686.287	-13.48119811	1.024593443	-13.15760725	1.54E-39	1.52E-36
LOC107381982	910.7504056	-6.976328658	0.535095618	-13.03753653	7.48E-39	6.98E-36
LOC107388899	944121.762	-13.34653751	1.024359431	-13.02915472	8.35E-39	7.41E-36
LOC107373578	1211.748867	-11.4220597	0.890719763	-12.82340437	1.21E-37	1.02E-34
LOC107382981	70594.63965	-5.480048524	0.43317223	-12.65096917	1.11E-36	8.91E-34
LOC107389175	207.6504302	5.747034025	0.456536525	12.5883335	2.45E-36	1.89E-33
LOC107375173	1510.887581	-9.383608195	0.749974573	-12.51190178	6.43E-36	4.75E-33
LOC107388941	4516.824387	-10.3423609	0.840065878	-12.31136887	7.87E-35	5.58E-32
LOC107373797	26767.80447	-13.32002828	1.083128187	-12.2977395	9.31E-35	6.35E-32
LOC107373574	11795.94793	-12.03437505	0.986555308	-12.19837849	3.17E-34	2.08E-31
LOC107375172	939.5145277	-10.14566515	0.832197996	-12.19140782	3.45E-34	2.19E-31
LOC107373575	16305.30232	-12.99899416	1.095779787	-11.86277964	1.85E-32	1.13E-29
LOC107375174	822.4948993	-9.14976322	0.79463871	-11.51436886	1.12E-30	6.60E-28
LOC107385923	1844.426041	-10.63087417	0.927172198	-11.46591129	1.96E-30	1.12E-27
LOC107373794	9964.822826	-11.27892982	1.002476249	-11.25106937	2.29E-29	1.27E-26
LOC107377558	4187.528009	-4.703011562	0.419086729	-11.22204842	3.18E-29	1.71E-26
nell1	66.55737433	5.464866478	0.492057157	11.10616196	1.17E-28	6.11E-26
LOC107388537	18516.57209	4.360561087	0.394242467	11.06060724	1.95E-28	9.87E-26
LOC107379976	1710.107258	-4.097131963	0.373076823	-10.98200615	4.66E-28	2.30E-25
gpr160	1201.926098	-10.5726376	0.977374144	-10.81739031	2.85E-27	1.36E-24
LOC107392704	341836.2135	-13.62881617	1.274583694	-10.69275893	1.10E-26	5.14E-24
LOC107373796	5124.384124	-12.51350644	1.185615141	-10.55444216	4.85E-26	2.20E-23
LOC107389173	3149.227345	5.047008354	0.491023062	10.27855663	8.80E-25	3.90E-22
LOC107372407	236.9687713	6.16199186	0.612148827	10.06616625	7.80E-24	3.37E-21
acsl1	2477.2704	-4.184429866	0.419789218	-9.967930771	2.11E-23	8.89E-21
LOC107379378	464.3711618	-4.067101826	0.411133864	-9.892402889	4.49E-23	1.85E-20
LOC107373798	790.5103042	-6.784865626	0.698521523	-9.713180482	2.65E-22	1.07E-19
myom3	280.2896981	4.603655864	0.476820028	9.654912957	4.69E-22	1.85E-19
LOC107385487	105.2659347	7.818032369	0.826307595	9.461406883	3.04E-21	1.17E-18
slc39a8	4938.729835	-2.475358277	0.266178841	-9.299605754	1.41E-20	5.32E-18
LOC107375022	123.8523988	7.795749731	0.838609032	9.296047901	1.46E-20	5.38E-18
LOC107388944	698.8476505	-4.873978654	0.531814337	-9.164812437	4.96E-20	1.73E-17
LOC107386477	748.0788926	-2.749033979	0.299950406	-9.164961685	4.96E-20	1.73E-17
LOC107385807	129.2009229	4.813805192	0.525033103	9.168574641	4.79E-20	1.73E-17
sh3bgr	139.0741169	5.479084173	0.606130732	9.039442944	1.57E-19	5.37E-17
ddah1	1888.95787	-8.547098714	0.990190213	-8.631774588	6.04E-18	2.02E-15
LOC107376472	657.2567483	-8.843165263	1.028195157	-8.600668079	7.93E-18	2.60E-15
LOC107385437	653.2855055	2.267361444	0.263729926	8.597285401	8.16E-18	2.63E-15
LOC107397151	287.3964519	3.994210367	0.464879997	8.591917032	8.55E-18	2.71E-15
rtn1	1794.503684	-4.245302922	0.496919514	-8.543240518	1.31E-17	4.06E-15
LOC107388367	1842.774799	-6.039974921	0.710815075	-8.497252151	1.94E-17	5.94E-15
LOC107380235	169.9730044	5.82047271	0.686231259	8.481794775	2.22E-17	6.66E-15
dnhd1	189.37124	-7.864951103	0.928393379	-8.471571733	2.42E-17	7.15E-15
LOC107392531	692.8064416	-1.989071538	0.235438351	-8.448375258	2.95E-17	8.59E-15
LOC107372942	243.6111573	-4.874051631	0.580821509	-8.391651409	4.79E-17	1.37E-14
LOC107387581	32330.61042	-5.669707169	0.680074042	-8.336896899	7.63E-17	2.15E-14
rims3	128.3769319	-4.012906281	0.482397102	-8.318678254	8.89E-17	2.46E-14
LOC107380841	222.0268057	-4.028934111	0.486440189	-8.282486108	1.21E-16	3.29E-14
tmem53	2201.294852	1.898767534	0.232332067	8.172645126	3.02E-16	7.98E-14
LOC107375944	140.3253963	8.126476018	0.9941693	8.174136962	2.98E-16	7.98E-14
slc27a6	4466.924831	2.91621643	0.360792773	8.082801678	6.33E-16	1.65E-13
ldah	1019.808618	-4.125170937	0.513571787	-8.032316106	9.56E-16	2.46E-13
sez6	73.06504192	6.350391359	0.791315243	8.025109357	1.01E-15	2.57E-13
LOC107394807	482.9906512	-3.223582478	0.402957568	-7.999806269	1.25E-15	3.11E-13
aldh1l2	121.037615	-2.554767897	0.327060754	-7.811294592	5.66E-15	1.39E-12
pycr1	4511.598316	-3.89526232	0.503375047	-7.738290457	1.01E-14	2.45E-12
igfals	16165.46786	1.897757335	0.245310809	7.736134172	1.02E-14	2.46E-12
itga11	225.0411369	2.939556102	0.381760251	7.700005676	1.36E-14	3.22E-12
LOC107380229	56.59226815	5.848984804	0.762918732	7.666589584	1.77E-14	4.12E-12
abhd6	3405.749434	-3.972149147	0.5212869	-7.6198906	2.54E-14	5.85E-12
LOC107374174	133.0100966	-4.21169731	0.557039587	-7.560858169	4.00E-14	9.10E-12
LOC107394644	336.6921928	-2.491319541	0.329781625	-7.554452269	4.21E-14	9.44E-12
LOC107379948	69.80793604	-6.679492514	0.890413912	-7.501559025	6.31E-14	1.40E-11
LOC107387431	212.3477215	-5.704431035	0.762227884	-7.483891832	7.22E-14	1.58E-11
LOC107377518	284.3828831	-3.042067364	0.409246526	-7.433337047	1.06E-13	2.29E-11
LOC107394454	3239.945421	4.40585689	0.594392578	7.412368611	1.24E-13	2.65E-11
LOC107395064	153.6164305	-2.873071231	0.387786913	-7.408891677	1.27E-13	2.66E-11
adgrv1	121.8632386	-4.279284905	0.577493577	-7.410099561	1.26E-13	2.66E-11
LOC107376304	283.7527141	-2.953879401	0.401069458	-7.36500708	1.77E-13	3.65E-11
LOC107376284	238.7804133	2.384673739	0.327046063	7.291553124	3.06E-13	6.24E-11
LOC107386290	12708.31437	1.934140349	0.265356148	7.28884694	3.13E-13	6.30E-11
LOC107388886	336.6978898	1.586246667	0.218524483	7.258896781	3.90E-13	7.78E-11
LOC107386603	30.15123786	-4.154833213	0.594120133	-6.99325437	2.69E-12	5.29E-10
fgf14	103.5855898	6.688254899	0.961150583	6.958592149	3.44E-12	6.70E-10
tnmd	46.15472258	-3.726817773	0.537017714	-6.939841411	3.93E-12	7.57E-10
LOC107389686	518.0828996	-7.324698809	1.058629417	-6.919039556	4.55E-12	8.67E-10
LOC107395922	41.80040075	3.293146448	0.477401212	6.898068883	5.27E-12	9.94E-10
LOC107388876	2772.385888	3.435387259	0.498910688	6.885776042	5.75E-12	1.07E-09
LOC107393469	21.54404272	4.841052372	0.708989872	6.82809806	8.60E-12	1.59E-09
depdc7	103.1715886	-6.84451057	1.006128614	-6.802818719	1.03E-11	1.88E-09
jph3	62.83676888	3.399265836	0.501489603	6.77833761	1.22E-11	2.20E-09
LOC107391885	295.9945789	3.131640404	0.464729853	6.738625426	1.60E-11	2.86E-09
flt4	311.4316116	3.062032234	0.455607083	6.720773989	1.81E-11	3.21E-09
LOC107375280	32.6976529	5.788075103	0.862325202	6.71217203	1.92E-11	3.37E-09
LOC107382111	8896.746924	2.609989367	0.389106634	6.707645515	1.98E-11	3.44E-09
uroc1	19235.42074	1.165457643	0.174149355	6.692288012	2.20E-11	3.78E-09
LOC107393840	157.3376059	-4.406813197	0.658986724	-6.687256411	2.27E-11	3.88E-09
LOC107373788	1889.825785	3.916375271	0.585872984	6.684683163	2.31E-11	3.91E-09
LOC107374710	137.0221779	-4.490805512	0.677429403	-6.629185996	3.38E-11	5.65E-09
pgm1	13297.92394	1.415561222	0.213814042	6.620525041	3.58E-11	5.93E-09
LOC107373658	3986.462077	3.972465361	0.602317363	6.595302745	4.24E-11	6.97E-09
LOC107380231	65.55834395	-5.120137898	0.778600367	-6.57607948	4.83E-11	7.86E-09
LOC107378903	392.7246508	-5.221680118	0.795396153	-6.564879777	5.21E-11	8.39E-09
scube1	154.219159	3.629617394	0.553196952	6.561166647	5.34E-11	8.53E-09
LOC107396118	173.3467065	3.599820316	0.550162429	6.543195472	6.02E-11	9.53E-09
LOC107375865	955.2391298	6.29738392	0.970137139	6.491230641	8.51E-11	1.34E-08
gria1	389.7524199	3.22466232	0.4985328	6.46830524	9.91E-11	1.54E-08
LOC107377894	359.7566695	2.459679857	0.381701899	6.443981187	1.16E-10	1.79E-08
LOC107394806	25.01951735	-5.200563943	0.812336216	-6.4019846	1.53E-10	2.34E-08
hsd17b3	338.8214295	3.914967681	0.612840248	6.388235265	1.68E-10	2.54E-08
LOC107378608	22.8891676	6.182655298	0.969500435	6.377155776	1.80E-10	2.71E-08
LOC107382160	22187.15327	1.124545132	0.177987821	6.318101592	2.65E-10	3.95E-08
LOC107387253	151.773404	2.568452666	0.407584403	6.3016461	2.95E-10	4.35E-08
ckb	6447.004681	-2.305204671	0.366694026	-6.286452765	3.25E-10	4.76E-08
LOC107383716	223.6129396	-3.931924647	0.625942176	-6.281610028	3.35E-10	4.87E-08
cntfr	1150.434309	-2.392373257	0.380965404	-6.279765116	3.39E-10	4.87E-08
csgr01h12orf40	36.01429616	-4.936620344	0.786210955	-6.279002234	3.41E-10	4.87E-08
gch1	7358.70871	1.21387727	0.193509128	6.272971623	3.54E-10	5.02E-08
LOC107388685	1862.623071	-3.331703262	0.53306751	-6.250058762	4.10E-10	5.71E-08
LOC107394231	728.129628	-1.560658872	0.249735697	-6.249242272	4.12E-10	5.71E-08
baiap2l2	44.11578629	-6.254862097	1.000654379	-6.250771723	4.08E-10	5.71E-08
LOC107373468	487.2556069	-1.669299336	0.267789138	-6.233633478	4.56E-10	6.26E-08
LOC107392295	40.6668945	2.740242793	0.441102216	6.212262589	5.22E-10	7.12E-08
fkbp14	148.0822129	-2.761608157	0.444663922	-6.210551425	5.28E-10	7.15E-08
LOC107375202	152.1898827	1.984889185	0.320867962	6.185999908	6.17E-10	8.29E-08
fam20a	7889.683964	-2.231178376	0.360886915	-6.182486209	6.31E-10	8.41E-08
xrcc3	196.0531509	-2.354325508	0.383915716	-6.132402016	8.66E-10	1.15E-07
sapcd1	220.7786704	5.359032705	0.876207498	6.116168505	9.59E-10	1.26E-07
nell2	75.08025222	3.107173766	0.508274777	6.113177174	9.77E-10	1.27E-07
amdhd2	852.9614807	1.662168036	0.273128183	6.085670167	1.16E-09	1.50E-07
plekhg6	42.91187649	2.813462379	0.464588801	6.055811881	1.40E-09	1.80E-07
ina	121.9640534	4.222412984	0.698679586	6.043418283	1.51E-09	1.92E-07
primpol	472.4134701	-2.190629541	0.363085896	-6.033364452	1.61E-09	2.03E-07
snx10	106.6536217	-4.614651628	0.765029114	-6.031994789	1.62E-09	2.04E-07
LOC107386055	26.91874499	3.185621781	0.529229819	6.019354291	1.75E-09	2.19E-07
LOC107385184	571.5483592	1.978379088	0.329364474	6.006655974	1.89E-09	2.35E-07
LOC107393470	21.96236775	4.643316325	0.774237221	5.997278612	2.01E-09	2.47E-07
LOC107387039	25.23463698	3.568837949	0.595522223	5.992787192	2.06E-09	2.52E-07
LOC107396072	142.4988469	4.103476296	0.684838949	5.991885099	2.07E-09	2.52E-07
sgk2	577.8089923	2.296322589	0.384190167	5.977046757	2.27E-09	2.74E-07
LOC107389103	19.58008106	3.356853378	0.564073861	5.95108834	2.66E-09	3.19E-07
slc23a1	68.42735209	3.275020952	0.551419398	5.939255974	2.86E-09	3.41E-07
LOC107385029	100.2777774	-5.379485961	0.91250631	-5.895286313	3.74E-09	4.42E-07
LOC107380927	78.25146943	-5.446539961	0.924991416	-5.888205952	3.90E-09	4.58E-07
LOC107389051	828.4890317	-1.800046156	0.306036518	-5.881801837	4.06E-09	4.73E-07
mdfic	430.2488305	-1.367444501	0.233127371	-5.865654028	4.47E-09	5.18E-07
LOC107386999	122.2013025	3.454710868	0.590307798	5.852389004	4.85E-09	5.58E-07
LOC107385752	145.3261557	1.826168331	0.312183607	5.849661194	4.93E-09	5.64E-07
fam118b	174.9647528	-2.283417037	0.390944384	-5.840772063	5.20E-09	5.91E-07
LOC107383013	133.8974862	-1.54032482	0.264171686	-5.830771809	5.52E-09	6.23E-07
LOC107380125	1321.878414	3.042575281	0.522153128	5.826978944	5.64E-09	6.33E-07
LOC107374175	45.15328534	-4.463940286	0.766269629	-5.825547715	5.69E-09	6.35E-07
LOC107384193	76.98895087	-4.454613626	0.765352692	-5.820340966	5.87E-09	6.47E-07
LOC107378274	24.33517557	2.944181327	0.505757583	5.821329082	5.84E-09	6.47E-07
LOC107380624	42.13535026	-4.75489897	0.82052004	-5.794982131	6.83E-09	7.48E-07
pgk1	6688.160632	1.13026764	0.195877588	5.770275454	7.91E-09	8.61E-07
LOC107375318	101.8905444	2.996088981	0.519833697	5.763552841	8.24E-09	8.91E-07
slc12a4	223.9254792	-2.468629042	0.429803943	-5.743616549	9.27E-09	9.96E-07
klhdc4	1020.385492	1.77351239	0.309814779	5.724427979	1.04E-08	1.11E-06
LOC107388405	13.28496551	5.355963332	0.93771763	5.711701645	1.12E-08	1.19E-06
LOC107395585	27.48556255	-5.159593392	0.90530201	-5.699306238	1.20E-08	1.27E-06
c7	99.72444322	-3.767349293	0.661490632	-5.695242099	1.23E-08	1.29E-06
pawr	631.7632314	1.837964837	0.322784713	5.694088855	1.24E-08	1.29E-06
LOC107388877	53.28337952	4.077755967	0.715974465	5.695393013	1.23E-08	1.29E-06
ldhb	5777.06083	1.248400149	0.219761169	5.680713091	1.34E-08	1.38E-06
tpi1	6587.825316	1.106774661	0.195027113	5.67497845	1.39E-08	1.41E-06
gamt	1374.306517	1.333194816	0.234858427	5.676589235	1.37E-08	1.41E-06
arfip2	92.85430111	-2.206033266	0.388961448	-5.67159876	1.41E-08	1.43E-06
LOC107383282	76.21167534	-3.629508074	0.643692414	-5.638575185	1.71E-08	1.73E-06
pir	31.63656286	2.108357299	0.374475578	5.630159673	1.80E-08	1.80E-06
LOC107372581	30.58102384	3.380231868	0.60071928	5.626974166	1.83E-08	1.83E-06
LOC107384740	36.61435433	-6.207953701	1.105741701	-5.614289211	1.97E-08	1.96E-06
b4galnt1	44.69041172	3.513420747	0.627912538	5.595398304	2.20E-08	2.17E-06
LOC107388092	51.62890768	-5.499028588	0.989520841	-5.557264041	2.74E-08	2.68E-06
gstz1	5383.627259	1.100845975	0.198337903	5.550356024	2.85E-08	2.78E-06
LOC107395705	99.28606185	3.412626013	0.61680149	5.532778489	3.15E-08	3.05E-06
LOC107396723	187.5556841	-3.977505961	0.719460602	-5.528455558	3.23E-08	3.11E-06
LOC107389872	15.54667968	4.924096269	0.892850975	5.515025916	3.49E-08	3.34E-06
tgoln2	1826.954977	-1.682049071	0.305313259	-5.509256551	3.60E-08	3.44E-06
matn3	20.7605091	-6.322885181	1.149818186	-5.499030418	3.82E-08	3.62E-06
slc6a8	56.6849791	-3.893516525	0.710009051	-5.483756188	4.16E-08	3.93E-06
wipi1	838.2187685	-1.30870363	0.238758688	-5.481281704	4.22E-08	3.95E-06
cers1	41.32890757	3.424454884	0.624788214	5.480985084	4.23E-08	3.95E-06
LOC107376458	2150.384132	1.628474581	0.297453495	5.474719951	4.38E-08	4.07E-06
LOC107379338	159.24812	2.434003953	0.447003295	5.445158863	5.18E-08	4.78E-06
gapdh	77537.0054	1.633149037	0.300112768	5.44178459	5.27E-08	4.85E-06
LOC107382540	25.69054293	-3.972754397	0.731277497	-5.432622247	5.55E-08	5.06E-06
atp10a	133.0854493	-2.388674788	0.439714669	-5.43232909	5.56E-08	5.06E-06
ca8	494.83742	1.766592489	0.326067992	5.41786539	6.03E-08	5.46E-06
igflr1	30.5773667	4.047016748	0.747314504	5.415413089	6.11E-08	5.50E-06
LOC107377595	193.4472435	-4.240153457	0.783485348	-5.411911618	6.24E-08	5.58E-06
LOC107384727	53.53605254	-2.680418113	0.497279574	-5.390163308	7.04E-08	6.27E-06
atp8b1	76.94539371	3.451230558	0.640722638	5.386465773	7.19E-08	6.37E-06
oat	22572.46823	1.621973407	0.301391671	5.381613247	7.38E-08	6.51E-06
LOC107377794	1868.01853	1.55458749	0.290428544	5.352736565	8.66E-08	7.60E-06
tmem263	597.24153	-1.850855821	0.34885116	-5.305574509	1.12E-07	9.81E-06
sult6b1	1229.654115	1.055360574	0.199208796	5.297760927	1.17E-07	1.02E-05
LOC107390822	13.24323663	4.423261854	0.837882909	5.279093066	1.30E-07	1.12E-05
LOC107376652	717.7163429	2.996246515	0.569414975	5.26197351	1.43E-07	1.23E-05
LOC107387421	752.7531366	1.636636961	0.311959754	5.246308024	1.55E-07	1.33E-05
celsr3	94.16106885	2.648051879	0.504792688	5.2458206	1.56E-07	1.33E-05
LOC107393749	7558.880466	1.769379213	0.33743313	5.243644022	1.57E-07	1.34E-05
cpt1b	1903.582392	-4.014499478	0.767072482	-5.233533433	1.66E-07	1.40E-05
LOC107381799	30.20420471	3.234133925	0.618292726	5.230748781	1.69E-07	1.42E-05
cln5	231.4667766	1.722443703	0.329629477	5.225393429	1.74E-07	1.45E-05
fam73b	58.5073597	-2.155312024	0.412973828	-5.219003909	1.80E-07	1.50E-05
hs6st1	129.3408976	-2.2814463	0.437995502	-5.208834997	1.90E-07	1.57E-05
cpd	2480.341487	-1.911178816	0.367244206	-5.204108837	1.95E-07	1.61E-05
abcd2	233.9914467	-2.900260886	0.557543775	-5.201853227	1.97E-07	1.62E-05
dgkg	42.9244567	2.532741548	0.487723548	5.192985979	2.07E-07	1.69E-05
LOC107388829	238.4078009	2.421627181	0.466554414	5.19044962	2.10E-07	1.69E-05
lrrc3b	36.95379194	-4.236803962	0.815926369	-5.192630268	2.07E-07	1.69E-05
lrrc17	141.4080271	-4.237008734	0.816303128	-5.1904845	2.10E-07	1.69E-05
LOC107385866	788.8698427	1.689887828	0.325712251	5.188284507	2.12E-07	1.70E-05
tmem64	346.0937748	-2.956319303	0.570172107	-5.184959538	2.16E-07	1.73E-05
LOC107374151	27.3167187	3.284527246	0.635605513	5.167556256	2.37E-07	1.89E-05
LOC107389522	431.4307371	1.766474947	0.342062866	5.164182143	2.41E-07	1.91E-05
kynu	6872.380573	1.007036513	0.195103264	5.161556465	2.45E-07	1.93E-05
LOC107394162	37148.70815	1.802615598	0.349373086	5.159572017	2.48E-07	1.94E-05
LOC107388354	2561.811932	1.182927502	0.229962041	5.144012006	2.69E-07	2.10E-05
lhfpl2	402.6694682	-3.39128329	0.659467337	-5.142458314	2.71E-07	2.11E-05
LOC107390185	18.45092296	3.76045993	0.73172837	5.139147375	2.76E-07	2.14E-05
lrp2	81.52671688	-3.039510447	0.591522516	-5.138452658	2.77E-07	2.14E-05
LOC107375692	5289.240719	1.275271941	0.248727105	5.127193276	2.94E-07	2.26E-05
fhl1	165.7833352	1.64347605	0.321135503	5.117702757	3.09E-07	2.36E-05
LOC107385482	4680.6434	0.981816322	0.191968887	5.114455472	3.15E-07	2.39E-05
LOC107388449	14.87017351	4.540742692	0.888612931	5.10992192	3.22E-07	2.44E-05
slc46a1	526.3823853	1.473336172	0.2885154	5.106611897	3.28E-07	2.47E-05
LOC107373178	509.7711296	-0.946076931	0.185485691	-5.100538615	3.39E-07	2.54E-05
LOC107384931	34382.40081	1.100940237	0.217304801	5.066341055	4.06E-07	3.03E-05
LOC107388936	673.2910129	-0.818148982	0.161650692	-5.061215467	4.17E-07	3.10E-05
LOC107395316	41.73538507	3.195292754	0.631564918	5.059325913	4.21E-07	3.12E-05
LOC107386228	68.47977435	-2.280508488	0.452095957	-5.044301885	4.55E-07	3.36E-05
tert	161.7665537	1.348780327	0.267886208	5.034900215	4.78E-07	3.52E-05
best3	50.27308438	-4.648635435	0.923453686	-5.033967059	4.80E-07	3.52E-05
LOC107391861	663.7327491	-2.018868251	0.401566748	-5.027478653	4.97E-07	3.63E-05
LOC107383610	4779.266841	1.443955248	0.287437866	5.02353872	5.07E-07	3.69E-05
adk	4837.053569	1.633913767	0.325352532	5.021979563	5.11E-07	3.70E-05
LOC107385606	6895.04377	-1.137632942	0.226814146	-5.015705424	5.28E-07	3.81E-05
LOC107376859	4870.550144	-1.64855016	0.329288988	-5.006393221	5.55E-07	3.98E-05
LOC107381877	1081.22188	1.842816459	0.368501193	5.00084259	5.71E-07	4.08E-05
LOC107385704	9.769896291	-4.254663296	0.852612375	-4.990149593	6.03E-07	4.30E-05
LOC107388686	14.3560697	-3.513780813	0.705696234	-4.979169002	6.39E-07	4.53E-05
arhgef37	43.82760424	-1.955255171	0.393319942	-4.971156965	6.66E-07	4.70E-05
pigt	1010.708089	-2.297015465	0.462794008	-4.963364747	6.93E-07	4.88E-05
rock2	501.6115425	1.436829712	0.289810387	4.95782683	7.13E-07	5.00E-05
agpat4	282.243598	-1.590713075	0.321621246	-4.945920373	7.58E-07	5.29E-05
shisa3	107.1000831	2.092410793	0.423391814	4.942019949	7.73E-07	5.36E-05
LOC107391081	797.9807014	-2.800050876	0.566556213	-4.942229586	7.72E-07	5.36E-05
LOC107374907	42920.65413	1.384284412	0.280284891	4.938847783	7.86E-07	5.42E-05
LOC107394968	4934.061129	1.600546697	0.324754482	4.928482245	8.29E-07	5.70E-05
LOC107394209	566.3752132	1.16296574	0.236050714	4.926762209	8.36E-07	5.72E-05
LOC107376516	455.4713801	-1.477423765	0.300086792	-4.923321534	8.51E-07	5.80E-05
LOC107374795	110.5227442	-1.34482659	0.275361939	-4.883850673	1.04E-06	7.07E-05
tmem82	1739.24261	1.171252119	0.239873112	4.882798686	1.05E-06	7.08E-05
LOC107389736	1200.376771	1.281808581	0.262579609	4.881599846	1.05E-06	7.09E-05
LOC107379921	289.0059708	2.247248339	0.461130401	4.873346748	1.10E-06	7.37E-05
LOC107379399	1526.162167	2.090869537	0.429337191	4.86999398	1.12E-06	7.47E-05
LOC107390728	67.05463795	-6.642255915	1.364286197	-4.868667533	1.12E-06	7.49E-05
LOC107390119	29.38937192	-2.654587617	0.545331174	-4.867844975	1.13E-06	7.49E-05
LOC107391211	11837.88835	1.288038734	0.264812011	4.863973993	1.15E-06	7.61E-05
nptxr	68.54425429	-3.195482988	0.658684189	-4.851312726	1.23E-06	8.07E-05
LOC107373875	209.5494011	1.27556104	0.262955331	4.850865862	1.23E-06	8.07E-05
LOC107377765	99.69841778	-2.563456437	0.528785483	-4.847819239	1.25E-06	8.17E-05
brpf1	176.2998886	1.733043309	0.358223437	4.837883643	1.31E-06	8.55E-05
LOC107388278	27.23546607	3.830785008	0.792714058	4.83249284	1.35E-06	8.73E-05
LOC107384328	77.96544135	2.345926392	0.485425085	4.832725926	1.35E-06	8.73E-05
LOC107388196	32.35991203	-4.756178479	0.984686691	-4.830143966	1.36E-06	8.80E-05
LOC107377068	99.72269402	-3.037322552	0.63043057	-4.817854173	1.45E-06	9.32E-05
LOC107395686	6226.812804	2.672671754	0.555541616	4.810929867	1.50E-06	9.62E-05
LOC107394705	1169.388822	1.101447861	0.229110145	4.807503664	1.53E-06	9.75E-05
LOC107386393	37.60898912	-2.26435445	0.471212244	-4.805381187	1.54E-06	9.82E-05
zdhhc9	192.567273	2.145559268	0.446656734	4.803597712	1.56E-06	9.87E-05
LOC107381079	4600.377622	1.188063531	0.24779069	4.794625388	1.63E-06	0.000102845
LOC107376378	29.33764656	-5.115745758	1.068777376	-4.78654009	1.70E-06	0.000106694
fgfr2	783.895742	1.314278438	0.275469528	4.771048344	1.83E-06	0.000114832
LOC107394607	9.279418204	-3.906641336	0.819573904	-4.766673653	1.87E-06	0.000116939
alas1	11146.02408	-2.320391738	0.486988585	-4.764776439	1.89E-06	0.00011763
LOC107379846	21.88775355	-2.87612355	0.604031128	-4.761548562	1.92E-06	0.00011911
akap14	41.60741864	2.718364162	0.571563613	4.756013329	1.97E-06	0.000121995
tcf7	69.31935905	-2.576869768	0.541899395	-4.755254926	1.98E-06	0.000122028
LOC107383964	65.64252418	-3.49395711	0.735988616	-4.74729776	2.06E-06	0.000126488
wnt5a	189.241983	-1.957485466	0.413588744	-4.732927324	2.21E-06	0.000135316
dera	10236.25234	0.851858458	0.181024783	4.705755999	2.53E-06	0.00015412
LOC107383844	512.1691635	2.3162811	0.493199341	4.696439975	2.65E-06	0.000160763
slc9a3r1	5609.5893	0.968960393	0.206687433	4.688046958	2.76E-06	0.000166926
pld1	1795.764151	-1.277273229	0.272869088	-4.680901159	2.86E-06	0.000172264
pim3	1393.398885	-2.63807093	0.564792354	-4.670868706	3.00E-06	0.000180283
LOC107384195	14.6215261	-2.710994793	0.581495279	-4.662109717	3.13E-06	0.000187494
ppic	558.213753	-1.190395248	0.255400447	-4.66089727	3.15E-06	0.000187967
LOC107378498	3983.516496	1.177215394	0.254080886	4.633230835	3.60E-06	0.000214214
ubtd2	476.4014751	-1.389600441	0.300433807	-4.625313157	3.74E-06	0.000221575
ppm1l	382.6669425	-2.041465436	0.441412466	-4.624847717	3.75E-06	0.000221575
LOC107388195	30.22585857	-3.632331222	0.7859767	-4.621423538	3.81E-06	0.000224516
adam12	105.625605	2.939407997	0.63629191	4.619590397	3.84E-06	0.000225759
acaa2	2284.538168	-1.883343316	0.407919349	-4.616950192	3.89E-06	0.000227895
LOC107388423	1682.780801	2.691700447	0.584321896	4.606537025	4.09E-06	0.000238033
olfml1	211.0785209	-1.36514946	0.296310921	-4.607152025	4.08E-06	0.000238033
LOC107372906	726.3197099	2.621208189	0.569384983	4.603578012	4.15E-06	0.000240653
prodh2	851.3682954	1.371938353	0.298802965	4.591448251	4.40E-06	0.000252896
LOC107389337	13.98761624	2.853980835	0.621619462	4.59120251	4.41E-06	0.000252896
LOC107372995	13.47638059	4.393461977	0.956894275	4.591376596	4.40E-06	0.000252896
LOC107390409	8.782127212	3.334874571	0.72736947	4.584842656	4.54E-06	0.000259876
lonp2	1425.032779	1.255217527	0.273851718	4.583566371	4.57E-06	0.000260441
LOC107388189	4691.900149	-1.10014269	0.240046263	-4.583044428	4.58E-06	0.000260441
LOC107393028	1913.282353	-1.605207382	0.350455916	-4.580340379	4.64E-06	0.000262989
slc17a5	1165.843239	-0.90148231	0.197163147	-4.57226578	4.82E-06	0.000272462
pdzd3	706.8100674	2.318705162	0.508136563	4.563153551	5.04E-06	0.000283661
pdzrn3	84.25776301	-1.86472223	0.408872138	-4.560648807	5.10E-06	0.000286157
sfmbt2	350.6486229	-1.397047906	0.306450853	-4.55879921	5.14E-06	0.000287778
LOC107388683	243.4674778	-5.445217639	1.195563322	-4.554520483	5.25E-06	0.000292774
rhobtb2	255.9709306	2.016421132	0.443572906	4.545861811	5.47E-06	0.000304117
bambi	2224.708448	1.759246311	0.387507995	4.539896812	5.63E-06	0.000311871
LOC107375883	31.70258185	-5.828972061	1.286218623	-4.531867254	5.85E-06	0.000322958
LOC107396314	35.45111783	-2.381296526	0.526113016	-4.526207214	6.01E-06	0.000330695
LOC107375402	2358.435391	-1.498313382	0.331140176	-4.524710346	6.05E-06	0.000332013
fndc3b	434.5247075	-1.464780078	0.324051248	-4.520211192	6.18E-06	0.000338101
bicc1	50.41058609	-3.387871776	0.749757868	-4.518621172	6.22E-06	0.000339601
LOC107396832	246557.963	1.529079109	0.339157354	4.508465144	6.53E-06	0.000354088
LOC107391141	502.1809384	3.118220609	0.691615572	4.508603818	6.53E-06	0.000354088
LOC107374031	10131.11239	1.513531771	0.335897581	4.505932339	6.61E-06	0.000354926
pdcd4	1806.496358	1.28871758	0.286039527	4.505382849	6.63E-06	0.000354926
creld2	5372.138863	-2.48160456	0.550615875	-4.506961518	6.58E-06	0.000354926
tpmt	1169.663785	1.257263795	0.279053751	4.505453844	6.62E-06	0.000354926
LOC107390727	69.0385035	-6.165358461	1.369267664	-4.502668561	6.71E-06	0.000358408
LOC107374741	267.9312047	1.552953249	0.345026556	4.500967312	6.76E-06	0.000360204
LOC107383121	72.04320719	1.46402069	0.326268373	4.487167045	7.22E-06	0.000383184
LOC107392021	567.5197295	1.476902347	0.329206721	4.486246031	7.25E-06	0.000383694
LOC107392150	312.5925852	-2.025202586	0.452145864	-4.479091256	7.50E-06	0.0003956
vdac3	3123.03108	0.883601877	0.197321227	4.477986934	7.54E-06	0.000396472
LOC107382316	93.80320031	-1.511690629	0.338066285	-4.471580563	7.76E-06	0.00040733
arhgef12	561.6055872	-1.869014044	0.418146313	-4.469760914	7.83E-06	0.000409599
LOC107387470	9718.959336	1.187979727	0.266379508	4.459726414	8.21E-06	0.00042799
LOC107373985	47.25107098	2.665661103	0.598858602	4.451236223	8.54E-06	0.000443962
aldh6a1	8434.391733	0.866088564	0.1946087	4.450410314	8.57E-06	0.00044437
LOC107394339	176.479356	-3.443797136	0.774041157	-4.449113726	8.62E-06	0.000445757
tmem47	577.4227186	-1.26770147	0.285204292	-4.444889174	8.79E-06	0.000453286
stxbp4	23.22617681	-5.131789539	1.155862033	-4.439794192	9.00E-06	0.000461467
LOC107388083	7.279739279	4.194291343	0.944645104	4.440071012	8.99E-06	0.000461467
mat2a	3596.289093	-2.068397609	0.465970201	-4.438905332	9.04E-06	0.000462042
LOC107379848	45.69336157	-3.388371947	0.7638357	-4.435995785	9.16E-06	0.000466982
LOC107372415	732.5854756	2.300929079	0.519234206	4.431389637	9.36E-06	0.000475704
LOC107377205	2564.898568	0.846924931	0.191352987	4.425982298	9.60E-06	0.000486386
LOC107386286	16.60029239	2.471667012	0.55866319	4.424252491	9.68E-06	0.000488902
LOC107376130	830.9306383	1.282666259	0.290145095	4.420775263	9.83E-06	0.000495425
LOC107385414	5023.633723	0.897656958	0.203525238	4.410543709	1.03E-05	0.000517952
gatm	1913.786875	3.517562025	0.799111846	4.401839422	1.07E-05	0.000536951
LOC107376424	10599.03093	1.165086315	0.264701405	4.401511646	1.07E-05	0.000536951
LOC107373629	15.13133375	5.206039752	1.182975812	4.400799831	1.08E-05	0.000537203
LOC107390376	23.8102591	3.735071934	0.849129927	4.398704857	1.09E-05	0.000540895
wdr47	393.6947191	-3.283425255	0.747159278	-4.394545249	1.11E-05	0.000549815
LOC107381437	9.691140642	4.426655477	1.011167208	4.377768033	1.20E-05	0.000592223
LOC107383109	76.92146469	1.509052724	0.345199505	4.371537913	1.23E-05	0.000606004
mtcl1	16.01000725	-4.212780688	0.963627109	-4.371795531	1.23E-05	0.000606004
nampt	1940.77828	1.178009747	0.269619084	4.369163088	1.25E-05	0.000610939
LOC107395318	821.6148342	0.963245037	0.220831103	4.361908379	1.29E-05	0.000629818
pik3ap1	233.1444984	-2.464527513	0.565246016	-4.360097093	1.30E-05	0.000633309
LOC107379146	30513.61073	1.646884553	0.378376479	4.352502446	1.35E-05	0.000653861
LOC107373042	3439.853437	1.291460429	0.296774384	4.351657352	1.35E-05	0.000654593
LOC107396387	24.92945743	2.094722635	0.481569034	4.349786815	1.36E-05	0.000658403
wdtc1	352.3519607	-1.197324246	0.275350501	-4.348364142	1.37E-05	0.000660887
ttc36	1809.005391	1.092067504	0.251210959	4.34721283	1.38E-05	0.000661926
LOC107373610	133.0141378	-1.525525736	0.350951287	-4.346830431	1.38E-05	0.000661926
LOC107388301	412.2479081	-1.955148874	0.44988505	-4.345885405	1.39E-05	0.000661963
LOC107397351	343.7146634	1.087180157	0.250177523	4.345634823	1.39E-05	0.000661963
plin5	2221.829723	0.903776494	0.208311809	4.338575427	1.43E-05	0.000681752
pde2a	75.26318778	1.844805532	0.425478954	4.335832635	1.45E-05	0.000688463
LOC107373007	146.5180879	1.117292636	0.25775692	4.334675625	1.46E-05	0.000690249
ghr	1336.921426	1.463159835	0.337722121	4.332437064	1.47E-05	0.000695452
LOC107385837	222.1563995	-1.17278715	0.270764424	-4.33139307	1.48E-05	0.000696905
dennd2d	1775.867478	0.670826384	0.154910344	4.330416993	1.49E-05	0.000698149
LOC107374522	1633.60209	0.621101605	0.143541582	4.326980346	1.51E-05	0.000707256
LOC107379827	133.9685951	-1.74585047	0.404037712	-4.3210087	1.55E-05	0.000724761
abat	992.2050586	1.571016255	0.363834407	4.317943071	1.57E-05	0.000730063
LOC107382226	121.724948	-1.191454751	0.27598571	-4.317088566	1.58E-05	0.000730063
dclre1a	284.2617882	2.059242857	0.476811847	4.318774525	1.57E-05	0.000730063
LOC107390851	3332.130328	0.904255284	0.209437263	4.317547266	1.58E-05	0.000730063
rbp2	675.5224775	-1.024507626	0.237459269	-4.31445625	1.60E-05	0.000736897
rpl22l1	636.459625	-1.293726524	0.300124847	-4.310627845	1.63E-05	0.00074783
LOC107378305	3455.703973	0.993764381	0.230608987	4.309304651	1.64E-05	0.000750374
LOC107393679	109.5931807	2.176699366	0.505463532	4.306343047	1.66E-05	0.000758526
LOC107396014	15303.454	0.555372724	0.129009848	4.30488626	1.67E-05	0.000761571
LOC107378877	682.5396763	1.410168826	0.327790512	4.302042835	1.69E-05	0.000767467
aldh8a1	11212.31008	0.672126096	0.156224157	4.302318586	1.69E-05	0.000767467
tjp2	296.8476383	1.172615523	0.272647875	4.300842329	1.70E-05	0.000769669
LOC107386519	28.98599939	-3.237513186	0.753486571	-4.296709869	1.73E-05	0.000782156
mgll	22.02885726	3.042721832	0.709294568	4.289785896	1.79E-05	0.000804895
p4ha1	301.3984388	-1.394258316	0.325601818	-4.282096228	1.85E-05	0.000831119
cxcl12	696.0797417	-2.234944428	0.523143972	-4.272140265	1.94E-05	0.000866923
kcnh7	44.59789954	3.659081437	0.856863797	4.270318634	1.95E-05	0.000869643
agxt2	5921.24769	1.219299129	0.285518138	4.270478708	1.95E-05	0.000869643
emilin2	85.73249782	1.746720454	0.409150441	4.269139858	1.96E-05	0.00087206
wrap53	614.924722	-1.247036475	0.292511596	-4.263203558	2.02E-05	0.00088888
LOC107395227	190.9314145	-1.509786612	0.354061472	-4.264193453	2.01E-05	0.00088888
LOC107391219	23.23993343	-1.858433069	0.435887971	-4.263556678	2.01E-05	0.00088888
gk5	3708.800431	0.722241989	0.169485766	4.261372536	2.03E-05	0.000893971
LOC107387904	108.9942884	-2.728307283	0.640535379	-4.259416999	2.05E-05	0.000899595
slc25a34	3786.316465	0.915093814	0.215005147	4.256148405	2.08E-05	0.000910587
angel1	110.0875875	-1.98947507	0.468044254	-4.250613172	2.13E-05	0.000931088
LOC107379994	917.4803136	-2.584029189	0.608055491	-4.249660149	2.14E-05	0.00093276
LOC107372661	296.7299858	2.122451698	0.499831092	4.246337881	2.17E-05	0.000941507
LOC107387676	43.17654125	-3.692362984	0.869625585	-4.245922668	2.18E-05	0.000941507
LOC107382285	20864.88998	0.934571043	0.22009605	4.246196349	2.17E-05	0.000941507
LOC107389956	317.4063244	1.745633536	0.411747671	4.239571124	2.24E-05	0.000966188
bin2	467.8906609	1.461069835	0.344817341	4.23722842	2.26E-05	0.000973951
LOC107375332	9.747063359	3.328260631	0.785923623	4.234839792	2.29E-05	0.000981978
rem1	526.449252	-2.418976756	0.5713646	-4.233683283	2.30E-05	0.00098466
LOC107393428	2868.393989	-2.97904663	0.70520625	-4.224362208	2.40E-05	0.001023835
LOC107387989	8.165356102	-4.609874872	1.09206376	-4.221250663	2.43E-05	0.001035577
clcn1	49.77215426	2.097373879	0.497121932	4.219033083	2.45E-05	0.001042107
LOC107386098	21.43967249	3.017228567	0.715194541	4.218752236	2.46E-05	0.001042107
cspg5	30.28891838	-3.440350731	0.816779401	-4.21209292	2.53E-05	0.001070562
LOC107378659	95.52279399	-2.905939721	0.689985476	-4.211595491	2.54E-05	0.001070562
slc4a11	13.38154485	4.532135475	1.076967677	4.208237232	2.57E-05	0.001084013
eef1g	3796.151687	-0.910806384	0.216463545	-4.207666394	2.58E-05	0.001084179
pamr1	305.5305009	2.038870044	0.485774101	4.19715674	2.70E-05	0.001133032
LOC107385488	19.38423096	-4.817001318	1.147993449	-4.196018124	2.72E-05	0.001136055
pbld	2873.842943	1.468814236	0.350237514	4.193766166	2.74E-05	0.001144698
msmb	7224.74701	1.402734293	0.334538057	4.19304849	2.75E-05	0.001145631
map1lc3c	13.56675301	-4.160495906	0.993107089	-4.189372879	2.80E-05	0.001161618
LOC107396572	153.3920884	-1.554625699	0.371567948	-4.183960723	2.86E-05	0.001186858
LOC107386932	12782.70041	1.845159466	0.441738268	4.177042376	2.95E-05	0.001219058
nfs1	1296.425697	0.764294796	0.182985125	4.176813814	2.96E-05	0.001219058
LOC107376737	11.69046249	-3.993650233	0.956872731	-4.173648286	3.00E-05	0.00123326
LOC107392988	18.74704322	2.765618664	0.662995215	4.171400636	3.03E-05	0.001242607
LOC107388014	22.88220957	-2.978092268	0.714767131	-4.166521009	3.09E-05	0.001266562
ankrd33b	159.26108	-2.193502295	0.527203908	-4.160633606	3.17E-05	0.001296666
capn5	786.1074923	1.134669197	0.273817862	4.143883042	3.41E-05	0.001391958
LOC107377493	32.53733158	-3.13083975	0.755922685	-4.141745993	3.45E-05	0.001401771
LOC107395574	5.806642008	-3.365922872	0.81333236	-4.138434715	3.50E-05	0.001418898
lum	45.45739634	-2.924775944	0.70769671	-4.132809864	3.58E-05	0.001447461
LOC107378458	42.99723552	-1.744249592	0.422011606	-4.133179198	3.58E-05	0.001447461
LOC107380208	1342.231625	-1.463061725	0.354268798	-4.129806894	3.63E-05	0.001463164
LOC107376578	348.9220957	-2.816623998	0.682171281	-4.128910255	3.64E-05	0.00146555
LOC107390187	26.48636437	-2.880216788	0.700446826	-4.111970648	3.92E-05	0.0015738
LOC107373693	198.2938796	1.473170355	0.358521562	4.109014657	3.97E-05	0.00159048
LOC107387579	1493.131348	1.126542369	0.274477452	4.104316617	4.06E-05	0.00161949
LOC107372833	42.22442109	2.270488198	0.553545713	4.101717611	4.10E-05	0.001630851
trnal-cag	17.34931832	-3.42547041	0.835142364	-4.101660456	4.10E-05	0.001630851
LOC107396464	976.5676747	2.308047507	0.563426281	4.096449854	4.20E-05	0.001664247
faah2	757.6487954	-1.175531155	0.287040804	-4.095345112	4.22E-05	0.00166847
rps20	6209.221926	-0.888925974	0.217097006	-4.094602641	4.23E-05	0.001670098
LOC107374920	96.41566949	1.828787587	0.446777265	4.093287033	4.25E-05	0.0016741
rps12	5602.786212	-0.92158276	0.225159715	-4.093017974	4.26E-05	0.0016741
LOC107382121	31.28008278	2.317699379	0.568910281	4.073927748	4.62E-05	0.001813483
rerg	87.50303875	1.719075412	0.422058873	4.073070184	4.64E-05	0.001816157
LOC107385788	17.38578609	4.307388325	1.057888218	4.071685697	4.67E-05	0.001822964
selenbp1	2938.074108	1.227035003	0.301731533	4.06664491	4.77E-05	0.001858736
LOC107396700	18.51965971	2.531960952	0.623266513	4.062404924	4.86E-05	0.001888681
tarbp1	104.3955524	-1.728565704	0.426248222	-4.055303028	5.01E-05	0.001930065
LOC107375681	1783.723122	-1.350885811	0.333035457	-4.056282244	4.99E-05	0.001930065
LOC107382750	50.44424837	1.940991517	0.478481301	4.056567124	4.98E-05	0.001930065
LOC107391883	16.69031182	-2.890072765	0.712595213	-4.055700504	5.00E-05	0.001930065
abhd4	6397.287789	1.02620582	0.253268771	4.051845063	5.08E-05	0.001949779
wnt10b	74.87308196	-2.642003455	0.652120048	-4.051406582	5.09E-05	0.001949779
LOC107394129	25.89815791	2.165516238	0.534415931	4.052117674	5.08E-05	0.001949779
g6pc3	54.19515049	-3.009697751	0.743412748	-4.048488218	5.15E-05	0.001969992
LOC107388474	51.82652099	2.189445167	0.540962813	4.047311784	5.18E-05	0.001975658
LOC107394281	7994.759621	1.25568617	0.310458904	4.044613167	5.24E-05	0.001994264
nid2	59.2412876	-2.155640145	0.533203928	-4.042806198	5.28E-05	0.002005397
twsg1	88.56760623	2.002722696	0.495461612	4.042134947	5.30E-05	0.002006851
LOC107374924	176.6077256	2.756505293	0.682778548	4.037187903	5.41E-05	0.002045257
LOC107389413	17.58596548	2.233632557	0.554986818	4.024658754	5.71E-05	0.002152665
LOC107375070	19.12447885	2.458714987	0.611536155	4.020555396	5.81E-05	0.002185858
LOC107377767	70.42922379	1.219550653	0.303467001	4.018725761	5.85E-05	0.002196295
LOC107375611	89063.71045	1.397692087	0.347820026	4.018434768	5.86E-05	0.002196295
bmp2	273.9553937	0.943492213	0.234885815	4.016812231	5.90E-05	0.002206799
LOC107395329	440.4839504	-2.866800485	0.713830008	-4.016082896	5.92E-05	0.002208976
LOC107386505	15.38566179	-4.533990802	1.129124027	-4.015494041	5.93E-05	0.002209847
LOC107389452	26.40709117	-3.231925439	0.805206745	-4.013783364	5.98E-05	0.002221265
gcdh	8897.979885	0.664837584	0.165737012	4.011400803	6.04E-05	0.002239112
pck2	22008.33619	0.836185384	0.20863792	4.007830337	6.13E-05	0.002268479
pygl	12760.22189	1.37637159	0.343510891	4.006777158	6.16E-05	0.002273866
arl4c	1740.305709	-1.453740883	0.362945131	-4.005401256	6.19E-05	0.002282388
LOC107372885	31.48193662	-1.576537819	0.394032005	-4.001040016	6.31E-05	0.002320048
pdp1	330.7025728	0.973429597	0.243443829	3.998579883	6.37E-05	0.002339437
LOC107394393	92.74192534	1.157702839	0.289632378	3.997145782	6.41E-05	0.002348787
hao2	4089.293039	0.756898062	0.189436949	3.995514421	6.46E-05	0.002360145
LOC107389258	425.5481543	-4.260382369	1.066987465	-3.992907611	6.53E-05	0.002381342
LOC107396982	59.36324259	2.598353446	0.650838383	3.992317468	6.54E-05	0.002382376
LOC107385718	69.91004761	3.03317608	0.759890722	3.991595096	6.56E-05	0.002384749
LOC107392212	467.8988569	-1.860302251	0.466503797	-3.987753716	6.67E-05	0.002408874
LOC107384345	8.398044531	4.187388935	1.049816945	3.988684842	6.64E-05	0.002408874
ppp1r16a	23.26099584	-2.470465643	0.619509964	-3.987773864	6.67E-05	0.002408874
LOC107396846	446.1650599	2.079735301	0.521627099	3.987015447	6.69E-05	0.002411468
mfsd6l	190.8948087	-2.760076688	0.693736708	-3.978565149	6.93E-05	0.002493717
myo5a	94.27870228	-2.698970599	0.678613482	-3.977183874	6.97E-05	0.002498107
fabp1	466.3392075	-4.20003486	1.056016867	-3.977242213	6.97E-05	0.002498107
LOC107387200	31.18555082	-5.196741174	1.307424425	-3.974792788	7.04E-05	0.00251825
dnajc10	1613.96533	-0.980154679	0.24669648	-3.973119843	7.09E-05	0.002530907
LOC107376632	99.77833658	1.373421612	0.346000779	3.969417683	7.20E-05	0.002565389
LOC107373561	1929.927911	1.128063599	0.284332141	3.967414989	7.27E-05	0.002581851
LOC107395647	27.95195014	-2.515112178	0.634071969	-3.966603639	7.29E-05	0.00258547
fkbp9	242.7531078	-1.735653459	0.437677133	-3.965602329	7.32E-05	0.002591167
LOC107386824	5.929403841	-4.012490116	1.012365923	-3.96347805	7.39E-05	0.002603948
hao1	12935.27446	0.856893241	0.216177314	3.963844417	7.38E-05	0.002603948
LOC107377674	260.8680303	-2.592519471	0.654344678	-3.962008952	7.43E-05	0.002614828
LOC107381711	6022.925316	1.353083906	0.341780081	3.95893143	7.53E-05	0.002643502
btc	250.4395111	1.502919287	0.379827023	3.956851927	7.59E-05	0.002661341
LOC107374310	873.8334803	1.487763057	0.376154193	3.955194666	7.65E-05	0.002674572
rnf2	3239.878282	2.026746873	0.512614501	3.953744717	7.69E-05	0.002685543
LOC107372804	372.9703362	1.05663689	0.267341242	3.952390143	7.74E-05	0.002695489
LOC107384374	581.3764406	0.936604072	0.237657075	3.940989655	8.11E-05	0.002821339
LOC107385394	158.4422439	1.374376167	0.348855425	3.939672623	8.16E-05	0.002831321
LOC107388379	534.0464239	-2.365881423	0.600705991	-3.938501463	8.20E-05	0.002834082
sdk2	76.92791889	-1.32936197	0.337514726	-3.938678426	8.19E-05	0.002834082
LOC107377949	428.416636	-1.078359938	0.273867902	-3.937518525	8.23E-05	0.002840176
LOC107388438	11.08015174	-4.006422372	1.018049573	-3.935390258	8.31E-05	0.0028599
grhl1	157.6514585	-2.775908296	0.705947262	-3.93217517	8.42E-05	0.002892814
LOC107396924	63.61213816	-1.203008523	0.306218448	-3.928595847	8.54E-05	0.002930523
miox	48835.47239	1.713877025	0.436760869	3.924062678	8.71E-05	0.002980484
ehhadh	3836.05842	1.028160678	0.262130277	3.922327059	8.77E-05	0.002996258
LOC107380845	39.20819902	1.98496608	0.506988582	3.915208645	9.03E-05	0.003080119
gys2	3047.774058	0.954936553	0.244034568	3.913120023	9.11E-05	0.003100929
LOC107377436	65.95500771	-1.198544482	0.306366916	-3.912121115	9.15E-05	0.003107822
LOC107391665	42.38784518	1.91542901	0.48976588	3.910907407	9.20E-05	0.003111561
psat1	813.933974	-2.672835832	0.683384512	-3.911174141	9.18E-05	0.003111561
LOC107383826	21556.39407	1.092485772	0.27982471	3.904179057	9.45E-05	0.00316916
LOC107381377	90.05693797	2.128549889	0.545087825	3.904966851	9.42E-05	0.00316916
LOC107385068	653.6676216	-2.622188154	0.671485835	-3.905053568	9.42E-05	0.00316916
LOC107385717	1016.98587	1.51824554	0.38870742	3.90588258	9.39E-05	0.00316916
LOC107386856	955.4064739	-1.736162167	0.444679491	-3.904300065	9.45E-05	0.00316916
oxgr1	164.1350111	-6.425033602	1.647024229	-3.900995193	9.58E-05	0.003205078
snx2	893.8686131	-1.298124588	0.333087026	-3.897253531	9.73E-05	0.003248855
LOC107379395	20317.28716	-1.069732864	0.275490163	-3.883016551	0.000103169	0.003438693
mmp19	17.64713016	-3.449878048	0.888822093	-3.881404476	0.000103855	0.003455077
eepd1	1287.670986	1.402929422	0.36156004	3.880211486	0.000104366	0.003465566
klhdc2	1251.018841	1.389613848	0.358218452	3.879235813	0.000104785	0.003472991
LOC107388875	313.1369797	-6.380249417	1.645174245	-3.878160283	0.000105249	0.003474912
LOC107373383	76602.33102	0.958910389	0.247285847	3.877740688	0.000105431	0.003474912
armc3	10.53547189	-3.649947732	0.941219773	-3.877891047	0.000105366	0.003474912
LOC107377348	147.9311857	-1.467364547	0.378815189	-3.873563129	0.000107256	0.003528491
LOC107373025	7.372065573	3.788329574	0.979927003	3.865930384	0.000110667	0.00363396
f7	5875.382161	0.868512981	0.22470305	3.865158844	0.000111017	0.003638729
LOC107380906	13.80634578	2.746317863	0.711031784	3.862440367	0.00011226	0.003672682
myo1c	805.6093076	-1.262220406	0.327001394	-3.859984789	0.000113394	0.003702954
LOC107388760	11.31533671	2.816289266	0.730210365	3.856819078	0.000114872	0.003737454
LOC107378918	9779.116269	-5.285369123	1.370246231	-3.857240403	0.000114674	0.003737454
LOC107393726	775.8943409	-1.758064618	0.455961754	-3.85572825	0.000115386	0.003747285
LOC107378698	8.877570308	-2.828995546	0.733996928	-3.854233498	0.000116093	0.003763358
cep89	49.23347183	-1.553485346	0.403565694	-3.849398921	0.000118408	0.003831407
LOC107381330	32.82541092	-3.104905599	0.807247661	-3.846286277	0.000119922	0.003873316
lmf2	1276.647669	0.973351225	0.253226189	3.843801577	0.000121143	0.003905649
LOC107389157	4507.556899	2.319549775	0.603663596	3.842454292	0.00012181	0.00392003
LOC107375383	3392.764646	0.858504844	0.223739072	3.837080556	0.000124506	0.003999518
aldh2	12229.43075	0.699435361	0.182491658	3.832697719	0.000126746	0.004064112
abcg5	2062.805098	1.156047955	0.301673516	3.832116163	0.000127046	0.00406638
cobll1	2011.795921	0.874679673	0.228369248	3.830111465	0.000128085	0.004092265
LOC107383489	101.5343499	-3.162674361	0.826189394	-3.828025854	0.000129175	0.004119666
rasef	2665.305374	2.005851207	0.524703598	3.822827241	0.00013193	0.004199976
LOC107385067	575.5905042	-2.802519338	0.733246092	-3.822071973	0.000132335	0.004201197
cnpy3	1031.926456	-0.804903117	0.210604415	-3.821872007	0.000132442	0.004201197
sh2d5	85.21521475	1.149584845	0.300986488	3.819390211	0.000133782	0.004236111
LOC107387161	3560.070625	0.810251789	0.212468377	3.813517099	0.000137003	0.004322665
grin2b	30.49155481	2.480714678	0.650464652	3.81375786	0.00013687	0.004322665
cmtm4	251.7290163	-1.21183189	0.317972908	-3.811116794	0.00013834	0.004357108
lcat	11244.33207	0.579468201	0.152131932	3.808984704	0.000139539	0.004387054
LOC107383755	6.28899811	-4.167399121	1.095155875	-3.805302256	0.000141631	0.004444961
kntc1	201.0791784	1.674832676	0.44025329	3.804247952	0.000142236	0.004456047
LOC107393282	7.203282268	-4.19846474	1.104807597	-3.80017729	0.000144593	0.004521898
nt5c2	1208.101481	1.170727631	0.308190018	3.798720149	0.000145445	0.004524622
LOC107386796	16.97579086	-3.929949572	1.0344004	-3.799253725	0.000145132	0.004524622
LOC107396004	41.4673844	-2.606569167	0.68611606	-3.799020779	0.000145269	0.004524622
LOC107372834	27.42887021	1.561958413	0.4112492	3.798082561	0.00014582	0.004528329
edc3	123.4116232	-1.836872792	0.483786931	-3.796863195	0.000146539	0.004542697
msrb2	659.5608601	-1.276411368	0.336324581	-3.795177161	0.000147538	0.004565698
mast3	50.00623083	-2.079739294	0.54891416	-3.788824273	0.000151362	0.004675871
shmt1	10872.28761	0.623958257	0.16478749	3.786441906	0.00015282	0.004712697
asph	3364.268597	0.478598466	0.126552214	3.78182611	0.000155682	0.004784324
kifc3	277.2629008	1.239482717	0.327710832	3.78224519	0.00015542	0.004784324
LOC107391649	26.80042972	-2.540340725	0.672278944	-3.778700415	0.000157649	0.004835367
mmp9	327.2285604	-5.123876458	1.356124759	-3.778322328	0.000157888	0.004835367
LOC107380304	1554.456976	-2.029848025	0.537984835	-3.773058071	0.000161259	0.004930069
LOC107380332	700.6683518	1.124772261	0.298188664	3.772015495	0.000161934	0.004942198
cabp4	14.70384901	2.177715275	0.577409551	3.771526244	0.000162252	0.004943392
LOC107376230	93044.4514	1.060306526	0.28117167	3.771029017	0.000162576	0.004944757
LOC107377499	428.5729565	-2.945677925	0.781347121	-3.769999079	0.000163248	0.004956706
cntd1	21.64609931	2.348398043	0.62305497	3.769166695	0.000163793	0.004964762
clu	212.3987847	-2.774439129	0.737293875	-3.763003092	0.000167885	0.005080101
loxl4	75.23131831	-2.949984591	0.784197177	-3.761789352	0.000168702	0.005087459
LOC107385327	134.597622	3.267874423	0.868624944	3.762123624	0.000168477	0.005087459
LOC107381469	110.6823263	-1.976791772	0.525676626	-3.760471119	0.000169594	0.005105662
LOC107379062	418.4149814	-1.210098003	0.321923708	-3.758958951	0.000170622	0.005127909
LOC107387186	86.83222802	1.821738911	0.485533951	3.75203198	0.000175407	0.005253916
LOC107394021	25.32421572	1.98618708	0.529345545	3.752156033	0.00017532	0.005253916
LOC107372551	135.7408089	-2.833101392	0.757692419	-3.739118041	0.000184667	0.005515143
gchfr	6703.905382	1.329319771	0.355527732	3.739004449	0.00018475	0.005515143
LOC107377507	2280.746409	0.874029058	0.234196307	3.732036032	0.000189938	0.005660481
alox5	239.1338979	-1.459352556	0.391352509	-3.728997572	0.000192243	0.005719552
LOC107396707	143.1159861	0.924723659	0.248479698	3.721526005	0.000198022	0.005881632
slc7a2	4710.99021	1.453556715	0.39081095	3.719334671	0.000199748	0.00592297
LOC107382584	74.05595775	-6.533934935	1.758937816	-3.714704907	0.000203441	0.006022396
LOC107379264	303.1504383	3.754128035	1.010928732	3.713543713	0.000204377	0.006040026
LOC107386526	32.39975381	1.988994404	0.536569206	3.706873935	0.000209833	0.006190956
LOC107387693	24.40045576	-2.360900376	0.637437059	-3.70373881	0.000212445	0.006257599
LOC107376266	190.0575262	0.900702207	0.243389815	3.700656939	0.000215042	0.006323591
LOC107375121	21.63084661	1.909106183	0.516546263	3.695905516	0.000219104	0.006432384
aox1	2113.060915	1.087752151	0.294552017	3.692903414	0.000221708	0.006498067
LOC107386809	56.20276986	-3.009472883	0.815093545	-3.692180978	0.000222339	0.006505805
LOC107375576	102907.0808	0.972142079	0.263529503	3.688930724	0.000225199	0.006578616
LOC107378682	625.8681194	1.170620739	0.317584128	3.686017766	0.00022779	0.006621607
gss	369.4942288	-1.037415773	0.281384943	-3.686820483	0.000227073	0.006621607
LOC107379835	25.95030518	1.989328802	0.539639637	3.686402306	0.000227447	0.006621607
ccdc47	1673.171139	0.630283698	0.171048984	3.684814044	0.00022887	0.00664209
LOC107383746	9058.389894	0.940780207	0.255342121	3.684390978	0.00022925	0.00664226
LOC107392952	32657.71072	1.057606199	0.287331816	3.680783477	0.000232518	0.00671501
LOC107385072	615.9819623	-2.448744162	0.665248165	-3.680948392	0.000232368	0.00671501
pof1b	26.07446485	1.933800864	0.526421172	3.673486111	0.000239264	0.006898575
tmem59l	90.84586353	1.76971816	0.482058338	3.671170103	0.000241443	0.006950097
LOC107390646	641.0023147	-1.632261273	0.44471127	-3.670384322	0.000242186	0.0069602
trim36	38.35211052	-3.195070814	0.870613246	-3.669908343	0.000242637	0.006961889
LOC107379006	60.46976046	-2.040032055	0.556652775	-3.664819696	0.000247513	0.007090305
LOC107380309	113.1515395	-2.858024875	0.780631656	-3.661169585	0.000251066	0.007180502
plod1	575.4684148	-1.391805778	0.380396575	-3.65882836	0.000253371	0.00723474
slc16a10	6539.609396	0.641949771	0.175472714	3.658402239	0.000253793	0.007235127
LOC107372608	382.4486199	-3.013527018	0.82536515	-3.651144005	0.000261075	0.007430784
sepn1	299.7985682	-0.823556394	0.225603498	-3.650459336	0.000261772	0.007438681
LOC107376746	16.94955946	-2.080960633	0.570125793	-3.650002611	0.000262238	0.007439997
LOC107374005	146.4823935	0.755595081	0.20708054	3.648798096	0.00026347	0.007463021
dio2	3547.987668	2.032989069	0.557251545	3.648243038	0.00026404	0.007467231
piezo2	185.4822343	-1.412587742	0.387303783	-3.647234562	0.000265078	0.007484652
bace2	233.9244702	1.239972921	0.34022888	3.644525775	0.000267885	0.007551895
LOC107390614	5.392804651	3.678423326	1.00952587	3.643713781	0.000268732	0.007563746
LOC107379621	161.7056336	-1.040869424	0.285996561	-3.639447339	0.000273224	0.007677979
slc25a35	19.244493	-2.328941253	0.640033923	-3.638777835	0.000273935	0.007684754
fkbp7	63.35889445	-1.437974197	0.395221024	-3.638405119	0.000274332	0.007684754
lig3	543.4529633	-1.174910732	0.323212323	-3.635104999	0.000277867	0.007771523
LOC107383079	266.5925992	-1.685443613	0.46416088	-3.631162571	0.000282147	0.007866411
csgr15h6orf226	352.8433227	-1.092085045	0.300735032	-3.631386202	0.000281903	0.007866411
dnajb4	20.6295179	2.502779836	0.689330781	3.630738542	0.000282611	0.007866978
LOC107389368	7.241031105	3.077450923	0.847888988	3.629544629	0.000283922	0.007891064
LOC107397356	22.66581473	2.282500518	0.629158433	3.627862867	0.000285777	0.007930199
LOC107387977	251.9402853	1.068501685	0.294616967	3.626748646	0.000287012	0.007952038
dusp8	255.3118418	1.50976558	0.416333968	3.626332934	0.000287475	0.007952419
proc	21536.35711	0.738786907	0.204030475	3.62096352	0.000293508	0.00810667
p3h1	94.47570139	-1.074160843	0.29673145	-3.619976396	0.00029463	0.008112387
rplp1	2336.76994	-0.800270903	0.221060486	-3.620144507	0.000294439	0.008112387
rufy2	1010.632047	1.194826735	0.330330005	3.617069949	0.000297957	0.008178591
krit1	225.5690544	0.777475912	0.214935704	3.617248779	0.000297751	0.008178591
gnmt	3756.577088	1.115657748	0.30854988	3.615810024	0.00029941	0.008205775
LOC107379301	11.3248515	-3.6158023	1.00014303	-3.615285205	0.000300017	0.008209728
gdpd1	746.2655256	-0.806441221	0.223115855	-3.61445053	0.000300985	0.00822353
LOC107389641	111.7290233	-5.142996655	1.423094554	-3.613952874	0.000301564	0.008226663
hn1	335.294141	1.019645983	0.282514789	3.609177364	0.00030717	0.008366713
slc39a11	575.182623	-1.218589198	0.338053791	-3.604719807	0.00031249	0.008498574
prkcq	107.2440472	-1.562740139	0.433807289	-3.602383315	0.000315313	0.008549127
LOC107395510	8.835751874	3.02935527	0.840907135	3.602484918	0.00031519	0.008549127
agtrap	50.33487459	-2.983167071	0.828297316	-3.601565539	0.000316307	0.008561286
LOC107397058	8.353654715	3.824277395	1.061939306	3.601220309	0.000316727	0.008561286
chrdl2	10.2403113	-2.5409362	0.705965187	-3.599237251	0.000319152	0.008613701
LOC107377101	5224.82535	1.020467466	0.283704412	3.596939012	0.000321984	0.008673105
LOC107374091	13.05545451	-3.072831978	0.854357436	-3.596658551	0.000322331	0.008673105
LOC107379413	19.33709811	-2.326526733	0.647007126	-3.595828609	0.000323361	0.008687623
allc	6958.233731	0.764902916	0.212846638	3.593680992	0.000326039	0.008737542
LOC107383805	1860.884252	-0.726766795	0.202242068	-3.59354907	0.000326204	0.008737542
slc25a10	3916.752351	0.872751933	0.242983545	3.591814968	0.000328383	0.008782635
csgr03h10orf105	6.890363127	-4.239652047	1.181211218	-3.589241266	0.000331642	0.008856434
galnt16	5072.054821	-1.168887841	0.325766799	-3.588112244	0.000333081	0.00888149
glod5	835.8630526	0.917823526	0.255902907	3.586608436	0.000335007	0.00891943
LOC107384878	1110.555906	1.287092769	0.359104253	3.584175789	0.000338144	0.008989467
LOC107372928	8.1571633	-4.65274291	1.29961659	-3.580088886	0.000343477	0.009117575
LOC107395081	3163.450577	-1.960131349	0.547992606	-3.576930289	0.000347653	0.009214619
LOC107378292	389.8151486	1.160272367	0.324527803	3.575263367	0.000349876	0.00925969
LOC107378586	2294.439388	0.730723765	0.204570808	3.571984551	0.000354286	0.009362451
LOC107379238	7308.928467	0.652059175	0.182742766	3.568180502	0.000359469	0.00948527
LOC107374177	443.3502934	-2.226690422	0.624203102	-3.567253053	0.000360743	0.009504267
ninj1	262.7283473	-1.637210426	0.459003877	-3.566877117	0.000361261	0.009504267
crym	1323.089547	0.966778918	0.271362197	3.562688281	0.000367076	0.009629569
vill	87.81342165	-3.150396358	0.884280944	-3.562664533	0.00036711	0.009629569
parm1	15.50772917	2.707653463	0.760134005	3.562073854	0.000367937	0.00963701
LOC107381710	1386.460266	0.966849915	0.271521697	3.560856924	0.000369646	0.009653271
pfkfb3	305.8140488	-2.660289624	0.747046097	-3.561078272	0.000369335	0.009653271
LOC107382593	13.30037045	-4.265972632	1.198575877	-3.559201143	0.000371985	0.009700045
LOC107382420	967.097275	1.01957268	0.286795417	3.555052211	0.000377904	0.009839933
LOC107386970	132.605032	1.058951217	0.297937497	3.554273056	0.000379025	0.009854662
ppcs	760.4481832	1.146541586	0.322686375	3.553114343	0.000380699	0.009869231
LOC107381850	42.034782	-1.662882152	0.467980673	-3.553313731	0.00038041	0.009869231
cytip	7.332006033	3.228081945	0.909183333	3.55052917	0.000384458	0.009952118
LOC107386975	252.478153	-3.883779764	1.093984592	-3.550122911	0.000385051	0.009952959
LOC107393882	5.692961187	-3.320192145	0.935427023	-3.549386604	0.00038613	0.009966306
LOC107379288	9937.711422	1.079579766	0.304235358	3.548501972	0.000387429	0.009985309
LOC107378456	29.50622022	-2.022157805	0.570215242	-3.546306124	0.000390672	0.010054278
LOC107387242	82.90091086	-2.849329308	0.804819687	-3.540332516	0.000399623	0.010269737
LOC107375316	20.08267589	1.969161358	0.556649709	3.537523375	0.000403898	0.010364583
LOC107372537	35.76815135	1.53937689	0.435799332	3.532306677	0.000411951	0.010540722
marco	545.19883	-2.349851726	0.665200349	-3.532547342	0.000411577	0.010540722
LOC107389235	182.4774575	0.785651556	0.222545187	3.530301269	0.000415087	0.010605645
fh	1941.022565	0.582552076	0.165279849	3.524640655	0.000424058	0.010819266
bnc2	22.77083983	-1.838252172	0.52179842	-3.522916323	0.000426826	0.010874253
mrc2	54.6932004	-1.433234456	0.407354092	-3.518399552	0.000434158	0.011045182
LOC107395531	587.1161753	-2.593838497	0.737356995	-3.517751259	0.00043522	0.011056337
LOC107376162	20.07363142	-2.730056888	0.777214089	-3.512618888	0.000443713	0.011255975
mfsd2a	1758.848436	-2.668655079	0.760144783	-3.510719459	0.000446896	0.011320508
f2	131614.9481	0.930541928	0.265237496	3.508334759	0.000450921	0.011389937
got1	8067.536178	1.393154772	0.397060161	3.508674272	0.000450346	0.011389937
grk1	8.873113885	-3.313735524	0.944664603	-3.507843434	0.000451755	0.011394761
hmgn1	1093.540253	-1.260603208	0.359994598	-3.50172812	0.000462251	0.011642949
LOC107381689	89.87566697	-2.368026433	0.676743089	-3.499151262	0.000466742	0.011739382
LOC107379260	26.68238938	-2.408164355	0.688442642	-3.497988371	0.000468782	0.011773071
LOC107380630	6.685494864	3.106392803	0.888141791	3.497631611	0.000469409	0.011773071
cdk2ap1	44.65831577	-2.503398611	0.716303822	-3.494883784	0.000474268	0.011878141
LOC107392068	114.9203996	-3.078124705	0.88205478	-3.489720565	0.000483526	0.01209292
glrx	3431.179659	-0.860460962	0.246673985	-3.488251751	0.00048619	0.012142426
csgr12h17orf89	423.9639346	1.016665813	0.291563655	3.486942891	0.000488576	0.012184844
syn2	11.43416791	2.794012137	0.801416765	3.486341013	0.000489676	0.012195142
zfp64	201.0197239	0.902924771	0.25909599	3.484904463	0.000492313	0.012243605
tecpr1	41.2295151	-2.534152979	0.72738439	-3.483925438	0.000494117	0.012271267
LOC107384335	288.3148185	-1.129241218	0.324638467	-3.478457833	0.000504308	0.012506833
LOC107386945	619.6563418	-0.649168681	0.186767155	-3.475818227	0.000509297	0.012612934
LOC107387266	115.7031313	-1.236140712	0.355709163	-3.475144418	0.000510578	0.012627024
LOC107383768	276.7783874	-1.924703643	0.5539367	-3.47459131	0.000511632	0.012635463
LOC107375023	31.59724607	1.931842561	0.557789097	3.463392477	0.00053341	0.013083192
xiap	721.5129656	0.697206842	0.201308689	3.46337182	0.000533451	0.013083192
LOC107377417	22.30053278	1.46490388	0.422922203	3.463766788	0.000532668	0.013083192
serpind1	57976.42547	0.781133647	0.225469299	3.464478987	0.00053126	0.013083192
LOC107384407	279.7047779	1.14612414	0.330869721	3.463974092	0.000532258	0.013083192
lpcat4	1330.686183	2.088508133	0.603931427	3.458187536	0.000543823	0.013319149
spon1	14.97700561	2.784661345	0.805585389	3.456692964	0.000546848	0.013374759
rgcc	388.2969975	-1.827805027	0.529067798	-3.45476522	0.000550772	0.01343369
itih5	60.58088705	2.036311827	0.589374036	3.455041628	0.000550208	0.01343369
LOC107374142	925.5981471	-0.80893521	0.234358681	-3.451697224	0.000557072	0.013568694
LOC107376610	306.2091043	-1.398185743	0.405115925	-3.451322584	0.000557846	0.013568905
LOC107387634	5471.801058	1.7585418	0.509657769	3.450436564	0.000559681	0.013594874
LOC107378342	346.4516924	1.139391647	0.330525661	3.447210861	0.000566406	0.013724821
prrg1	76.56957788	-1.54288145	0.44758451	-3.447128788	0.000566578	0.013724821
LOC107378304	88.41338064	-2.445305591	0.711083945	-3.438842359	0.000584207	0.014132557
LOC107374709	140.6480493	-2.107111683	0.613445163	-3.434881895	0.000592812	0.014321178
LOC107372710	9.05115528	-2.852993106	0.830746518	-3.434252259	0.000594191	0.014334958
myo5c	207.97738	-1.457315851	0.424655771	-3.431758025	0.000599682	0.014447782
dmtf1	840.4934425	-1.659597637	0.483776621	-3.430504007	0.000602461	0.014495034
gale	667.5778924	-0.84820685	0.247334813	-3.42938723	0.000604946	0.014535093
cldn1	13949.49498	0.671751154	0.195956294	3.428066233	0.000607897	0.014586241
LOC107374067	623.0136221	-0.769268784	0.224596649	-3.425112471	0.000614545	0.014725826
ugdh	5468.032014	0.955168901	0.27899565	3.42359783	0.00061798	0.014788154
ifrd1	8116.782997	-1.142252703	0.333848741	-3.421467754	0.000622841	0.014884391
prss35	62.02561848	1.21133643	0.354196434	3.419956597	0.000626311	0.014947176
LOC107392678	15.46032169	1.997034486	0.584051531	3.41927789	0.000627876	0.01496437
LOC107380420	7.618989214	-3.913719828	1.145839326	-3.41559217	0.000636435	0.015148004
LOC107392470	53.86505016	2.021678174	0.592190564	3.413897983	0.000640406	0.015222078
LOC107393172	28.46339993	2.904557284	0.851012307	3.413061432	0.000642375	0.015236657
rpl12	2132.398301	-0.827320351	0.242409247	-3.412907561	0.000642737	0.015236657
cdh8	4.206697853	-3.588424384	1.051724168	-3.411944397	0.000645013	0.01527018
gas1	481.2818261	1.19517501	0.350348333	3.411390601	0.000646324	0.01528083
LOC107381277	5149.52567	-1.039096514	0.304658127	-3.410696844	0.000647971	0.015299361
LOC107380389	9053.85144	1.269974852	0.3727477	3.407062881	0.00065666	0.015483902
slc35g1	782.9314337	1.194102742	0.350748818	3.404438395	0.000663003	0.015591991
LOC107372680	22.4250445	-2.896495683	0.850787192	-3.404489056	0.00066288	0.015591991
LOC107391137	38.94104152	-3.417111259	1.004677682	-3.401201521	0.000670903	0.015756902
LOC107391268	16.17211552	2.798299367	0.822879506	3.400618619	0.000672336	0.015769649
LOC107395817	29.19351961	-2.82602112	0.831353	-3.399303447	0.000675577	0.015803871
lyz	208.7439685	-2.686963427	0.790444194	-3.399308197	0.000675565	0.015803871
LOC107392394	78.19575528	-1.796971086	0.528876391	-3.397714693	0.000679512	0.015874987
crb3	633.0869392	1.110984695	0.327108261	3.396382261	0.000682829	0.015924537
aqp9	3306.383606	-1.239350114	0.364928852	-3.396141762	0.00068343	0.015924537
LOC107376956	25.31209598	-2.303847067	0.678558647	-3.395206999	0.000685767	0.015958039
LOC107387485	582.3971334	1.16944693	0.344543109	3.394196256	0.000688303	0.015996064
LOC107393600	297.089294	-3.340010455	0.984596678	-3.392262569	0.00069318	0.016078853
LOC107389947	704.8008387	-2.402512281	0.70827421	-3.392065173	0.000693679	0.016078853
mogat2	128.6270659	1.972970374	0.581843011	3.390898123	0.00069664	0.016126396
LOC107383596	10.51865068	-2.37004435	0.699039281	-3.390430857	0.000697829	0.01613285
spata20	224.0031487	1.38196143	0.407708746	3.389580047	0.000699998	0.016161926
syne2	108.2052329	-1.62886266	0.480639361	-3.388949784	0.000701609	0.016178054
qdpr	19722.10374	0.795909298	0.235036782	3.386318047	0.000708372	0.016270542
mapk10	30.20680794	-3.312667719	0.978150449	-3.386664827	0.000707478	0.016270542
abcg8	3990.018901	0.964085793	0.284693006	3.386404908	0.000708148	0.016270542
sned1	250.9650686	-1.427307282	0.421834332	-3.383573057	0.000715492	0.016412805
LOC107384130	27.35189677	2.304996143	0.681549742	3.381992539	0.000719621	0.016486201
nkx1-1	8.152059608	-3.515351514	1.040073532	-3.379906713	0.000725104	0.016590388
LOC107395985	71.93924214	1.601860843	0.474107378	3.37868786	0.000728327	0.016642636
LOC107393991	151.724339	-2.439645035	0.72231243	-3.377548181	0.000731351	0.016690248
ptpn6	525.6880416	-2.037002897	0.605120889	-3.366274298	0.000761909	0.017348696
esrrb	4.852022395	3.398746556	1.009673675	3.366183195	0.000762161	0.017348696
LOC107379298	24.1301444	-2.145346264	0.637686753	-3.364263494	0.000767482	0.017447431
LOC107389483	5.100841592	-3.576638501	1.06361455	-3.362720548	0.000771784	0.017522769
LOC107392391	326.7838963	-2.334923199	0.694430063	-3.36235904	0.000772796	0.017523291
LOC107385006	59.81106997	1.527115021	0.454476069	3.360165967	0.000778957	0.017640433
tubgcp5	426.5341852	-1.280004577	0.380992309	-3.359659884	0.000780385	0.017650234
LOC107389529	659.3932136	-1.388874193	0.413812005	-3.356292651	0.000789949	0.017821096
LOC107394669	3422.196945	0.96719497	0.28815081	3.35655822	0.000789191	0.017821096
LOC107389059	207.2153877	1.070639317	0.319501494	3.350968108	0.000805296	0.018144224
josd2	246.2003601	-1.234099323	0.368520643	-3.348792925	0.000811644	0.018264057
LOC107385008	16.37253504	3.084627838	0.923497766	3.340157337	0.000837309	0.018817706
f13a1	258.6194005	-1.172879436	0.351201174	-3.339622767	0.000838923	0.018830096
ppfia1	543.9724695	-0.99417994	0.297776334	-3.338680172	0.000841774	0.018870215
LOC107378636	42.58002909	1.846929523	0.553946347	3.334130703	0.000855664	0.019157375
iars	744.0163543	-0.969368773	0.291519166	-3.325231704	0.000883451	0.01975454
col6a1	149.7869972	-1.388100795	0.417572363	-3.324216153	0.000886674	0.019779108
LOC107375262	8.721945117	-2.988775525	0.89910083	-3.324182813	0.00088678	0.019779108
fgl2	92.47039439	-2.048451631	0.616351874	-3.323510021	0.000888922	0.019801972
LOC107380448	65.46254222	-2.472173539	0.744238641	-3.321748433	0.000894553	0.019902403
LOC107386595	5.776456491	-2.806736387	0.84607909	-3.317345176	0.000908773	0.020144479
sema7a	6.902349215	-3.118385285	0.940030386	-3.317323919	0.000908842	0.020144479
zc2hc1a	214.2053732	-0.695700942	0.209675811	-3.317983785	0.000906697	0.020144479
LOC107373089	43.30623546	-2.632253579	0.794020014	-3.315097269	0.000916112	0.020280281
LOC107386965	12.01205883	-4.644026434	1.401912417	-3.312636635	0.00092421	0.020434023
LOC107383706	12189.07081	0.877907587	0.265169765	3.31073789	0.000930503	0.020547551
LOC107388240	950.0891949	-1.231783897	0.372153636	-3.309880054	0.00093336	0.02058499
LOC107376289	10603.90763	1.431243752	0.433139248	3.304350179	0.000951968	0.020969322
LOC107386992	123.0803982	-2.185431184	0.662935518	-3.296596915	0.000978638	0.021490164
LOC107374952	1635.712146	-1.017920881	0.308795723	-3.296421568	0.00097925	0.021490164
LOC107374551	112.9860326	0.815657666	0.247405896	3.29684005	0.000977792	0.021490164
stxbp6	1420.266046	0.803503935	0.243829731	3.295348488	0.000982997	0.021545738
rgr	5772.623407	0.988546864	0.300041089	3.294704956	0.000985251	0.021568475
p3h3	57.72373874	-1.554945282	0.472094685	-3.293714867	0.000988727	0.021604591
LOC107387973	101.0359817	-2.398627742	0.728282221	-3.293541533	0.000989337	0.021604591
LOC107390469	505.7988511	-4.437870365	1.347823514	-3.292619783	0.000992586	0.021648876
tmem168	1359.162175	-0.873932265	0.265454061	-3.29221659	0.00099401	0.021653305
rpl5	5753.512575	-0.576515826	0.1751893	-3.29081642	0.000998971	0.021734663
LOC107381322	361.2093444	-2.508592401	0.762828179	-3.288541861	0.001007078	0.021857415
LOC107393918	100.9863524	2.050308471	0.623405246	3.288885494	0.001005849	0.021857415
LOC107396625	37576.3746	1.001695606	0.304877643	3.285565957	0.001017777	0.022062621
LOC107393680	65019.94285	0.904488034	0.275646842	3.281329212	0.001033191	0.0223694
LOC107387906	151.0549029	-2.273768313	0.693310489	-3.279581586	0.001039611	0.022480964
LOC107384211	64644.30434	-1.091916138	0.333110432	-3.277940387	0.001045675	0.02257546
emid1	161.8867698	-1.774853895	0.541492007	-3.277710241	0.001046528	0.02257546
plpp3	855.5876295	0.618494773	0.188871117	3.274692187	0.001057772	0.022790287
adamts1	20.97898674	-2.833639154	0.865667902	-3.273355921	0.001062786	0.022827942
LOC107380988	12905.58347	0.842213031	0.257261549	3.273761797	0.00106126	0.022827942
itk	5.921301544	2.953510095	0.902331769	3.273197506	0.001063381	0.022827942
LOC107391269	112.1609143	1.330791566	0.406691463	3.272238755	0.001066994	0.022862331
LOC107383443	17.70337565	-2.224880508	0.679957342	-3.272088368	0.001067562	0.022862331
sema3g	26.15756239	-1.629170224	0.498519065	-3.268019899	0.001083028	0.023137643
LOC107391707	157.8941006	-2.464333399	0.754061699	-3.268079259	0.0010828	0.023137643
LOC107373870	29076.54315	0.756560861	0.231623116	3.266344362	0.001089457	0.023246988
oxct1	4134.797962	0.788314394	0.241562572	3.263396264	0.001100855	0.023433802
ell2	1629.540538	-1.098983942	0.336741641	-3.263581952	0.001100134	0.023433802
card9	59.73024518	-3.031211317	0.929327797	-3.26172458	0.001107367	0.023544158
naaladl1	1885.224692	0.865867464	0.265722595	3.258539099	0.001119874	0.023781573
LOC107379041	21.6160656	-1.817377801	0.557860364	-3.2577647	0.001122935	0.023818037
hgd	21374.2536	0.835529713	0.256548442	3.25681071	0.001126715	0.023863545
LOC107389257	428.5316571	-3.153387688	0.968323183	-3.256544659	0.001127772	0.023863545
LOC107373612	20.41985203	-2.984693789	0.917137459	-3.254358177	0.001136489	0.024019334
LOC107383622	375.5218584	1.238261162	0.380623648	3.25324285	0.001140959	0.024056471
LOC107394609	325.9875764	-0.805131499	0.247464704	-3.253520549	0.001139845	0.024056471
LOC107391028	196.2948846	1.124027406	0.345729086	3.251179759	0.001149272	0.024202952
LOC107380689	37.16022693	-4.182076953	1.287336051	-3.248628786	0.001159627	0.02439206
mfrp	189.0443322	1.81899904	0.560102883	3.247615923	0.001163762	0.024450043
LOC107377576	181.6112782	-1.545497831	0.476221313	-3.245335283	0.001173124	0.024604703
LOC107379828	19.85821697	-1.953589497	0.602003347	-3.245147237	0.001173899	0.024604703
fn1	23476.56245	0.991429861	0.305748346	3.242633605	0.001184304	0.024793482
LOC107388181	181.1810676	-3.846234686	1.188012758	-3.237536518	0.001205665	0.025210912
crtap	47.88014745	-1.151507235	0.355844857	-3.235981106	0.001212254	0.025318833
LOC107390231	87.39206229	-1.35189071	0.418057649	-3.233742317	0.001221796	0.025478411
mbd6	76.88089516	-1.067192555	0.33004099	-3.233515191	0.001222768	0.025478411
LOC107392593	91.44901304	-2.910136543	0.900280598	-3.232477239	0.001227219	0.025541138
LOC107378507	6796.53634	1.047967366	0.324267778	3.231796176	0.001230148	0.025572073
boll	5.716363833	3.388971768	1.049000237	3.230668259	0.001235012	0.025643128
gpr84	294.6182039	-3.360872244	1.041615153	-3.22659692	0.001252718	0.025980345
LOC107373789	6.026977689	-3.409484488	1.056994258	-3.225641448	0.001256907	0.026036772
LOC107385281	1470.049067	0.465919406	0.144554507	3.223139951	0.001267936	0.026204008
ren	10.20948193	-3.388429212	1.051232841	-3.223290862	0.001267268	0.026204008
fahd1	712.9263676	0.737566661	0.228951841	3.2214926	0.001275248	0.026324435
masp2	2361.478491	0.847905682	0.263288824	3.220439325	0.001279943	0.026359984
got2	6113.949804	0.609492161	0.189256975	3.220447548	0.001279906	0.026359984
LOC107372607	751.3386028	-2.381004272	0.739680966	-3.218961121	0.001286559	0.026465509
LOC107391632	67537.03909	0.99640206	0.309684138	3.217478515	0.001293227	0.026571846
pde7b	12.81001087	-3.453147124	1.073442048	-3.216891989	0.001295874	0.026595409
LOC107387761	9.836660282	2.966030077	0.923267355	3.212536501	0.001315684	0.026970767
LOC107388053	77.84271956	-1.084572469	0.337698848	-3.211655818	0.001319724	0.027022336
LOC107395290	2196.442055	0.880506861	0.274252726	3.210567397	0.001324732	0.027093596
rictor	80.77004418	-1.070203727	0.333781959	-3.206295905	0.001344556	0.027467368
cep135	24.44412948	-1.570344173	0.489904399	-3.205409417	0.001348705	0.027520409
LOC107390583	1282.365594	1.490080017	0.46536669	3.201948163	0.001365016	0.027821214
LOC107384334	5301.435921	1.742206892	0.544238158	3.201184751	0.001368637	0.027857499
LOC107384282	7463.029136	0.921304406	0.287825678	3.200911095	0.001369938	0.027857499
LOC107390468	144.4667881	-1.056735558	0.330340615	-3.19892714	0.0013794	0.028017784
eprs	608.0298472	-0.658600177	0.205930785	-3.19816281	0.001383062	0.028057691
fbxo8	970.3268585	0.578941041	0.181040321	3.197856907	0.00138453	0.028057691
LOC107393208	12.12040509	2.44719296	0.76554209	3.196679832	0.001390191	0.028140267
LOC107395693	276.1098014	-4.023151572	1.258793382	-3.196038071	0.001393287	0.02814745
blnk	101.354019	-2.244531722	0.702305401	-3.195948256	0.001393721	0.02814745
dcxr	1340.696355	0.699563618	0.218990526	3.194492613	0.001400769	0.028225489
LOC107388144	11.81014358	-3.770068855	1.180111862	-3.194670757	0.001399904	0.028225489
LOC107379863	2175.257599	1.013742638	0.317383748	3.194059696	0.001402871	0.028235766
LOC107383111	5.883724667	3.187315141	0.998063644	3.193498892	0.001405599	0.028258591
enpp5	180.4219577	0.821273469	0.257201192	3.193116881	0.00140746	0.028263958
LOC107388882	2854.837578	0.59970533	0.187838874	3.192658238	0.001409697	0.02827686
LOC107373673	25.07572235	-2.455010955	0.769034853	-3.192327298	0.001411313	0.028277293
LOC107374388	9840.980962	0.771545894	0.241901792	3.189500529	0.001425189	0.028523078
LOC107385404	22.26800718	-2.056470395	0.645178571	-3.187443737	0.001435364	0.02869433
LOC107392671	9.825526589	-3.097647	0.971958795	-3.187014732	0.001437495	0.028704564
LOC107382207	19.97943782	-2.444806621	0.767740893	-3.184416309	0.001450462	0.028930934
lpgat1	100.5050574	-1.219994034	0.383310446	-3.182783164	0.001458668	0.029061913
LOC107390497	64.98932789	-1.435795979	0.4514913	-3.180118817	0.001472147	0.029264136
anks1b	167.0896191	1.148585474	0.361143906	3.180409398	0.001470671	0.029264136
hpcal1	254.8700711	1.083604662	0.340777653	3.179799653	0.001473769	0.029264136
LOC107376534	129.4642011	-0.786546929	0.247496446	-3.178013022	0.001482881	0.02941213
LOC107374060	10.5782186	-3.503910978	1.10291764	-3.176947083	0.001488342	0.029487462
LOC107372630	120.5070325	-1.578518402	0.497486802	-3.172985484	0.001508801	0.029831549
LOC107387122	45.57532926	-2.903730163	0.915191299	-3.172812247	0.001509701	0.029831549
vcam1	186.9698981	1.38501772	0.436554756	3.172609391	0.001510756	0.029831549
pusl1	56.52579467	-1.901980265	0.599776957	-3.171145946	0.001518388	0.029948901
LOC107379535	6.694862691	-3.623550461	1.142797149	-3.170773101	0.001520338	0.029954046
perp	5159.334195	0.64871834	0.204616301	3.170413777	0.00152222	0.029957831
itih3	79242.82096	0.961727957	0.30343316	3.16948865	0.001527074	0.030020044
LOC107390221	73.02102025	1.361611212	0.429770695	3.168227213	0.001533716	0.030117224
samd4a	325.5526668	1.23889255	0.391235186	3.166618427	0.001542225	0.030250819
spats2	424.4662875	-1.127613554	0.356233217	-3.165380149	0.001548805	0.030346301
LOC107383314	438.9083654	-2.507358162	0.792283007	-3.164725405	0.001552294	0.030381096
LOC107375102	10039.07995	1.263990764	0.399468679	3.164179902	0.001555206	0.030404541
vstm2a	11.64783358	-3.024993786	0.95712392	-3.160503799	0.001574966	0.03065564
prkch	224.8975467	-1.681166946	0.531882158	-3.160788382	0.001573428	0.03065564
scamp1	961.8044695	0.408459874	0.129202197	3.161400368	0.001570125	0.03065564
antxr2	728.9625501	0.728410881	0.230434727	3.161029113	0.001572128	0.03065564
LOC107387945	126.4250468	-2.544397236	0.805211437	-3.159911943	0.001578168	0.030684298
LOC107380548	9.613912737	-3.219225118	1.019458785	-3.157778584	0.001589763	0.03087587
LOC107390014	444.7813624	-1.197210609	0.379274695	-3.156579191	0.001596315	0.030880673
pla2g6	524.5616472	-1.143582918	0.362221476	-3.157137261	0.001593263	0.030880673
LOC107394181	128.3657021	1.580659368	0.500769882	3.156458538	0.001596976	0.030880673
LOC107384239	45.16677263	-1.214270924	0.384626152	-3.157016017	0.001593926	0.030880673
sarm1	96.12554801	1.569260533	0.497327197	3.155388531	0.001602845	0.030960401
slc5a10	46.25260149	-1.652461166	0.523844506	-3.154487918	0.0016078	0.031022324
LOC107372602	4.092385839	-3.143194616	0.996895113	-3.152984277	0.001616105	0.031148669
adamts3	70.33023923	-1.140692754	0.361958691	-3.151444575	0.00162465	0.031279362
LOC107377039	105.4882941	1.053286579	0.334257305	3.151125087	0.001626428	0.031279636
pex5	2106.558419	0.6153571	0.195423221	3.148843304	0.001639181	0.031490738
LOC107382807	809.6009546	-1.207820361	0.383784651	-3.147130449	0.001648814	0.031573182
tp53i3	499.3076853	-1.30271316	0.413927643	-3.147200196	0.001648421	0.031573182
rab34	38.29361427	-1.707131708	0.542361699	-3.14758898	0.00164623	0.031573182
LOC107395071	289.5176034	-0.58734289	0.186858546	-3.143248736	0.001670838	0.031960408
LOC107388645	129.7446609	-2.384363723	0.759363205	-3.139951616	0.001689757	0.032287477
LOC107380625	52.86484203	1.177649041	0.375181864	3.138875178	0.001695977	0.032371431
klhl8	24.69405425	1.83713522	0.585510101	3.137666143	0.001702987	0.032470291
kcnc1	39.80504212	-2.253405959	0.718443273	-3.136512018	0.001709704	0.032563348
mfsd10	902.5313981	-0.967777617	0.308664446	-3.135371208	0.001716368	0.032655186
slc25a11	1325.902699	0.769732193	0.245607727	3.133990132	0.001724467	0.032774106
dennd6b	159.9175028	-0.8738859	0.278891351	-3.133427762	0.001727774	0.032801816
calcoco2	3685.402976	0.69198478	0.220866156	3.133050312	0.001729998	0.0328089
asf1b	403.0282401	1.071675313	0.342098498	3.13265132	0.001732351	0.032818428
LOC107386086	24572.97042	0.733737776	0.234348805	3.130964447	0.001742333	0.03295114
LOC107384631	148.0534157	-2.282587039	0.729065452	-3.130839668	0.001743073	0.03295114
LOC107378674	113.4073113	-2.150100185	0.687457606	-3.127611313	0.001762331	0.033279711
LOC107389482	3.559821525	-3.556458318	1.137939207	-3.125350015	0.001775936	0.033500956
LOC107379286	4.164293016	-3.420091041	1.094704546	-3.124213792	0.001782809	0.03359486
LOC107393721	26.43111505	-2.633375524	0.844618462	-3.117828515	0.001821888	0.034294813
LOC107390940	162.9490644	2.284532927	0.733051189	3.116471213	0.001830295	0.034416543
xrcc1	776.3396793	0.668874037	0.214697595	3.115423986	0.001836807	0.034502393
LOC107384342	299.3704515	-0.646236743	0.207534133	-3.113881726	0.001846435	0.034646544
LOC107382689	75.65882521	-1.87729133	0.602970339	-3.113405768	0.001849416	0.03466579
pvalb	12.96110793	-2.636052424	0.846766223	-3.113081691	0.001851448	0.034667233
jak1	1613.247321	-1.31566672	0.42306219	-3.109865996	0.001871722	0.034881552
LOC107372647	126.6206746	-1.023177939	0.328985544	-3.110099994	0.00187024	0.034881552
LOC107377276	520.5669239	1.243090752	0.399745283	3.109707117	0.001872729	0.034881552
LOC107377914	1232.833527	-1.576827364	0.506903714	-3.110703911	0.00186642	0.034881552
LOC107373879	170.3420918	1.159692579	0.372877878	3.110113648	0.001870154	0.034881552
LOC107374497	8.717002228	-3.080855623	0.991070804	-3.108613039	0.001879677	0.034963933
LOC107395654	35.99601173	-3.150152044	1.013435229	-3.10839011	0.001881096	0.034963933
slc25a16	301.8352579	0.73703386	0.237174868	3.107554638	0.001886421	0.03498956
LOC107394700	126.1257952	1.425873063	0.458822867	3.107676549	0.001885643	0.03498956
LOC107373280	284.6533285	0.598550332	0.192633081	3.107204274	0.001888658	0.034994453
LOC107384262	22.06650019	-3.003821767	0.967226585	-3.105602984	0.001898915	0.035147764
LOC107380233	526.1191463	-1.335142447	0.429964953	-3.105235528	0.001901276	0.035154765
aamdc	1091.85991	0.635447013	0.204689435	3.104444612	0.001906366	0.035212172
polr1e	368.278407	1.075906693	0.346737676	3.102941406	0.001916076	0.035354688
LOC107397006	162.9601582	0.874489928	0.281900013	3.102128016	0.001921349	0.035415127
LOC107391342	69.03415524	-2.183490931	0.704388828	-3.099837538	0.001936268	0.035653071
tfec	38.09844878	-2.882569136	0.930481164	-3.097933893	0.001948749	0.03584566
cbr1	3642.21336	0.573523406	0.185442309	3.092732225	0.00198323	0.036442108
sord	4603.272632	0.67735483	0.219098556	3.091553141	0.001991123	0.036549275
LOC107395330	119.1228495	1.127846723	0.364856956	3.091202468	0.001993477	0.036554629
LOC107374539	2387.879514	-1.612519386	0.521752832	-3.090580996	0.001997653	0.036593373
LOC107381462	653.3623835	0.828621521	0.268158474	3.090044135	0.002001268	0.03662175
galnt2	768.3146573	-0.991244531	0.320859083	-3.089345399	0.002005981	0.036670156
pacsin2	1553.997908	0.660588513	0.213999819	3.086864824	0.002022796	0.036902843
LOC107386190	167.728569	1.132940275	0.367021056	3.086853617	0.002022872	0.036902843
LOC107388792	10.80199326	-2.483531718	0.805202508	-3.08435666	0.002039929	0.037137596
LOC107383017	983.3181051	0.672106479	0.217896483	3.084521924	0.002038796	0.037137596
LOC107385010	48.0233791	-2.575399983	0.835335211	-3.083073656	0.002048744	0.037259831
arhgap22	19.34309056	-2.477317715	0.803803976	-3.081992362	0.002056201	0.03735713
LOC107389801	9.131329003	-2.471820343	0.802202596	-3.081291877	0.002061045	0.037406807
ackr3	426.000224	0.908496287	0.294883608	3.080863981	0.002064009	0.037422301
atic	4171.639101	0.847730339	0.275287997	3.079430806	0.002073965	0.037564407
LOC107379108	164.8648594	-2.559429884	0.831774523	-3.077071748	0.00209045	0.037824342
LOC107387566	1983.040624	0.956317712	0.310976697	3.075206985	0.002103565	0.038022851
aoc1	9.574359609	-3.61305762	1.175137148	-3.074583785	0.002107965	0.03806358
LOC107380514	376.2603335	1.913979701	0.622663737	3.073857667	0.002113102	0.038110266
LOC107379963	147.8496711	1.134353017	0.369061981	3.073611139	0.002114849	0.038110266
LOC107393902	28.51581795	-1.610289198	0.524204923	-3.071869663	0.002127226	0.038294385
LOC107391671	17.09899626	-2.038980925	0.664235486	-3.069665756	0.002142985	0.038538947
LOC107372780	225.2313815	1.177347555	0.383615547	3.069081962	0.002147177	0.038575216
fam168a	157.3717801	-0.786006029	0.256151408	-3.068521211	0.002151211	0.038608569
bace1	12.22243125	-2.189719091	0.713706305	-3.068095483	0.002154278	0.038624522
slc46a2	186.0560264	-2.091454453	0.681961107	-3.06682365	0.002163465	0.038750054
LOC107375879	749.5072939	2.096231953	0.683823945	3.065455618	0.002173386	0.03884928
LOC107394020	31.61183248	2.118175115	0.690977335	3.065476983	0.002173231	0.03884928
LOC107382421	1321.164669	0.508127263	0.165781816	3.065036172	0.002176437	0.038864628
LOC107385798	74.792835	-1.686375109	0.550615698	-3.062708011	0.00219344	0.039128846
LOC107390161	50.76787014	1.222321365	0.399464974	3.059896224	0.002214137	0.039418752
tdrp	953.203366	0.749512948	0.244940608	3.059978304	0.00221353	0.039418752
rhobtb3	369.8112418	-1.10892624	0.362636866	-3.057952306	0.00222855	0.039635563
spo11	24.32669228	-2.58704736	0.846183498	-3.057312468	0.002233313	0.039680474
LOC107372650	10.18114052	2.155979145	0.705366655	3.056536808	0.0022391	0.039743462
uaca	96.31557016	-0.935390412	0.306067673	-3.056155535	0.002241949	0.039754244
prdx5	3175.594735	0.871383969	0.285328624	3.053966188	0.002258375	0.040005506
pcbd1	1138.666527	0.963872944	0.315706459	3.053066911	0.002265154	0.040085544
aig1	1692.235402	-0.937728885	0.307310134	-3.051408921	0.002277701	0.040187265
LOC107372330	844.2927729	1.467573174	0.480922315	3.051580533	0.0022764	0.040187265
LOC107388078	1449.445085	0.788682243	0.258416537	3.051980544	0.002273368	0.040187265
fabp6	79.67176566	-2.769330378	0.907735912	-3.050810641	0.002282245	0.040227397
LOC107379082	866.1094548	0.834105947	0.273463584	3.050153645	0.002287243	0.040275469
LOC107383139	31.78015268	-1.464351869	0.480262003	-3.049068758	0.002295519	0.04034108
mgrn1	701.49979	-0.452409431	0.148376189	-3.049070298	0.002295508	0.04034108
cldn5	94.16692303	-1.9751031	0.648458062	-3.045845547	0.00232027	0.04073567
LOC107381739	8.748991231	2.090393217	0.686408815	3.045405552	0.002323667	0.040754967
LOC107382075	7.092869114	3.986425983	1.311112327	3.040491574	0.002361923	0.041370477
LOC107373198	470.816604	0.890512076	0.292902715	3.040299836	0.002363427	0.041370477
hal	17157.31259	0.703777544	0.231639724	3.038242021	0.002379628	0.041462789
LOC107382774	459.7650311	0.58042545	0.191018826	3.038577204	0.002376982	0.041462789
spag1	571.2276866	0.878361004	0.289167235	3.037553697	0.002385069	0.041462789
LOC107383779	16.1792141	2.375253587	0.781842575	3.038020264	0.002381379	0.041462789
shbg	16328.56748	0.793789507	0.261226937	3.038696985	0.002376037	0.041462789
LOC107381839	61.53415887	1.53698641	0.505957514	3.037777613	0.002383298	0.041462789
LOC107392135	749.4741821	0.77788925	0.256089631	3.037566371	0.002384969	0.041462789
sod2	2164.025393	0.731294711	0.240782197	3.037162719	0.002388165	0.041475947
LOC107372444	190.368511	1.423674014	0.468885292	3.036294888	0.00239505	0.041537889
LOC107385838	1926.049623	0.917836449	0.302449492	3.03467678	0.002407936	0.041537889
LOC107382066	109.6484591	-1.419726545	0.467679171	-3.035684787	0.002399901	0.041537889
LOC107381331	1544.53844	-1.296010068	0.426975595	-3.035325867	0.002402759	0.041537889
LOC107372549	26.72153116	1.911030793	0.629736276	3.034652546	0.002408129	0.041537889
LOC107395964	1189.521409	0.565247037	0.186242223	3.03501015	0.002405276	0.041537889
fgg	312882.459	1.170310023	0.385466893	3.036084403	0.002396723	0.041537889
ccndbp1	247.3988796	0.7700821	0.254197436	3.029464464	0.002449877	0.042149015
LOC107378592	14.53327561	1.780691916	0.587835009	3.029237607	0.002451718	0.042149015
usp40	321.6395936	-1.254815016	0.414257324	-3.029071405	0.002453067	0.042149015
glyctk	2852.945609	0.793073613	0.261746948	3.02992497	0.002446145	0.042149015
LOC107388787	16.39175521	1.481128228	0.489061216	3.028512956	0.002457605	0.042186117
hmox1	8.473072617	-2.614342701	0.86344335	-3.027810338	0.002463326	0.042243427
gapdhs	2492.657426	-2.250817835	0.743574919	-3.027022265	0.002469758	0.042312795
LOC107380031	44.28695672	-2.074978589	0.685956361	-3.024942559	0.002486804	0.042563707
ephx2	2843.281069	0.734628248	0.242981731	3.023388816	0.002499609	0.04274162
LOC107388079	1711.681521	0.758374012	0.250983014	3.021614888	0.002514302	0.04291011
LOC107394107	1794.000832	-1.538880836	0.509253276	-3.021837876	0.002512451	0.04291011
itih2	66840.59045	0.704490183	0.233456025	3.017656894	0.002547371	0.043432682
chdh	2202.834417	0.768523302	0.255061179	3.013093976	0.002585988	0.044048745
sftpb	2146.143949	-2.264186184	0.751555681	-3.012665914	0.002589638	0.044068586
LOC107385936	103.9465613	-1.227023921	0.407605972	-3.010318803	0.002609736	0.044368016
LOC107378681	24.78076997	1.644836813	0.546621473	3.009096595	0.002620258	0.044504228
LOC107379659	428.3896707	-2.291586997	0.761971871	-3.007443036	0.002634555	0.044667632
nlrc5	68.49378287	1.368470952	0.455034368	3.007401303	0.002634917	0.044667632
b3gat2	8.96606852	2.519688249	0.838090746	3.006462321	0.002643068	0.044763021
LOC107391672	177.6570225	-1.972605078	0.656294723	-3.005669571	0.002649968	0.044837053
LOC107385809	629.9831081	-1.229010607	0.409153343	-3.00378972	0.002666395	0.045071996
LOC107388716	347.2761306	-2.172754989	0.723616523	-3.002633188	0.002676548	0.045160879
fsd2	93.05134176	-2.476322031	0.824723016	-3.002610552	0.002676747	0.045160879
sat2	29.73563986	1.477293375	0.492054658	3.002295274	0.002679521	0.045164708
LOC107388466	120.8953943	-1.734305716	0.577852369	-3.001295504	0.002688335	0.045270241
amdhd1	4773.487723	0.785509127	0.261941795	2.998792641	0.002710517	0.045600465
tmc5	230.8818183	1.002017203	0.334195183	2.99829936	0.002714909	0.04563105
myof	32.90695177	-2.473624449	0.825691903	-2.995820161	0.002737078	0.045960102
LOC107395703	552.5639556	0.872726283	0.291487492	2.994043681	0.002753065	0.046184819
LOC107379516	14.31328441	-2.052566762	0.686604065	-2.989447435	0.002794825	0.046841061
LOC107390226	939.668307	1.171495301	0.392132289	2.987500223	0.002812691	0.047059762
LOC107396597	82.6065408	-1.77336625	0.593669715	-2.987126013	0.002816136	0.047059762
pla2g15	11899.60763	1.250557246	0.418684779	2.986870576	0.00281849	0.047059762
eef1b2	1790.038333	-0.933421298	0.312492369	-2.987021092	0.002817103	0.047059762
acsl4	431.3511747	-1.531148783	0.513091942	-2.984160648	0.002843574	0.047433923
LOC107389678	38.49803885	2.484356199	0.832806513	2.983113317	0.002853323	0.047551813
mut	1841.387602	0.487739506	0.163566983	2.981894626	0.002864706	0.047696679
LOC107379425	141.5574026	0.853318405	0.286254118	2.980982109	0.002873256	0.047717323
LOC107392454	235.902081	-2.17431823	0.729416502	-2.980900794	0.002874019	0.047717323
crlf1	85.69739574	-1.425626809	0.478244733	-2.98095663	0.002873495	0.047717323
LOC107378962	3807.021553	0.793906541	0.266527713	2.978701657	0.002894725	0.048016146
LOC107386627	4068.79015	1.231973596	0.4140743	2.975247667	0.002927521	0.048514766
LOC107387588	20.60622261	-1.353504771	0.455136721	-2.973842165	0.002940963	0.048636988
LOC107373260	151.1634355	-1.187329421	0.399232355	-2.974031054	0.002939153	0.048636988
LOC107395516	372.5547382	0.953061293	0.320505765	2.973616693	0.002943125	0.048636988
traf2	397.3751836	-0.879230927	0.295951946	-2.970857052	0.0029697	0.049020039
LOC107373793	5.925309221	-3.289655541	1.1073908	-2.970636509	0.002971833	0.049020039
dnajb5	7.943849224	-3.134525084	1.055527944	-2.969627761	0.002981608	0.049046492
LOC107372338	14.28937735	-2.315141896	0.779684988	-2.969329834	0.002984501	0.049046492
shmt2	6600.981964	0.511721399	0.172304668	2.969863816	0.002979318	0.049046492
tnr	129.3167512	1.429560778	0.481398849	2.969597417	0.002981902	0.049046492
fam13b	294.0031891	-1.003027699	0.338321377	-2.964718657	0.003029599	0.04974152
map3k8	662.8724492	-0.909879578	0.307058134	-2.963216005	0.003044428	0.049938766
LOC107386506	1087.360559	-1.981390812	0.669164595	-2.960991703	0.003066502	0.050254356
LOC107375784	45.7088674	1.175074079	0.396935617	2.960364425	0.003072753	0.050310306
LOC107388770	7.278873496	2.302134196	0.778003248	2.959029028	0.0030861	0.050482224
mrpl2	779.3172641	0.514467691	0.173974314	2.957147411	0.003104996	0.050744512
cxadr	1955.206936	0.836388158	0.2829205	2.956265662	0.003113888	0.050811348
hdac7	35.78363996	-1.169117178	0.395517815	-2.955915342	0.003117426	0.050811348
abcc5	210.2129597	1.265643474	0.428199277	2.955734727	0.003119252	0.050811348
LOC107375533	182.3430776	-0.877662409	0.296948315	-2.955606633	0.003120548	0.050811348
LOC107375507	10.14827465	2.037814791	0.689598017	2.955076348	0.003125917	0.050852071
rcn3	4945.287243	-0.971732692	0.328872199	-2.954742592	0.0031293	0.050860451
LOC107395225	223.7112722	-1.291801555	0.437397002	-2.953384565	0.003143101	0.051037979
LOC107388012	11.83611127	-2.716675284	0.920170787	-2.952359847	0.003153552	0.051160826
LOC107373942	33.75391113	-3.799972567	1.288607738	-2.948897834	0.003189094	0.051677489
LOC107390517	85769.61116	0.872918954	0.29603608	2.948691096	0.003191228	0.051677489
LOC107395091	21.685581	-1.492157965	0.5061748	-2.947910412	0.003199298	0.051749523
pik3r6	13.43715956	-1.910193897	0.648029385	-2.94769642	0.003201513	0.051749523
LOC107385864	891.803572	0.837002504	0.28402758	2.946905733	0.00320971	0.051834776
naaa	390.379412	-0.870646448	0.295523065	-2.946120126	0.003217874	0.051879462
pah	14762.62751	0.856666824	0.290782283	2.946076408	0.003218329	0.051879462
LOC107377658	34413.97187	0.965132276	0.327759581	2.944634827	0.00323336	0.052074428
rras	1012.322858	0.964969228	0.327836689	2.943444894	0.003245816	0.052227595
pdk1	72.81132419	-0.808297411	0.274640352	-2.94311235	0.003249305	0.05223633
LOC107382751	3908.846031	0.857020528	0.291339482	2.94165598	0.003264624	0.052435063
LOC107387751	26496.93506	0.74531007	0.253414605	2.941069913	0.003270807	0.052486833
LOC107387043	36701.34245	0.980448995	0.333613573	2.938876216	0.003294046	0.052629914
cpeb1	4.900899976	-2.855538137	0.971495652	-2.939321582	0.003289316	0.052629914
LOC107396345	272.711395	0.960009785	0.326664217	2.938827503	0.003294564	0.052629914
LOC107394429	931.9807721	1.463961862	0.498096944	2.93911031	0.003291559	0.052629914
LOC107384596	81423.41456	0.818832141	0.278566163	2.93945299	0.003287921	0.052629914
LOC107381181	3.650488959	-3.138496311	1.068761878	-2.9365721	0.003318617	0.052871258
id3	8207.680105	1.096413627	0.373342951	2.936746558	0.00331675	0.052871258
coq9	1368.030347	0.575716345	0.19602814	2.936906639	0.003315039	0.052871258
tspan4	190.5373838	-2.271358206	0.774097897	-2.934200201	0.003344084	0.053229177
LOC107392876	126.9193545	-2.023244013	0.689689606	-2.933557352	0.003351017	0.053249605
llgl1	900.425077	0.958455223	0.326724823	2.933524343	0.003351374	0.053249605
LOC107385032	44.0632779	-1.980746373	0.675577397	-2.931931087	0.003368615	0.053427799
LOC107396272	18264.30618	-0.604580479	0.206189832	-2.93215467	0.003366191	0.053427799
LOC107395359	6.718193348	2.485505901	0.847818278	2.931649345	0.003371672	0.053428498
LOC107393020	21.06395129	-2.27784711	0.777107336	-2.931187244	0.003376692	0.053460268
LOC107383803	15.06898547	-3.03818557	1.036820205	-2.930291631	0.00338644	0.053561789
LOC107375468	6.748250079	-2.871032959	0.979860179	-2.93004351	0.003389145	0.053561789
tymp	906.8135637	1.15090374	0.392980302	2.928655037	0.00340432	0.053753699
LOC107396586	30.22947823	-1.456860244	0.497634079	-2.927573301	0.003416185	0.053893058
LOC107396492	60.18391029	-1.157055439	0.395518717	-2.925412599	0.003439998	0.054220483
cpm	13.09148561	-2.878130538	0.984232903	-2.92423727	0.003453014	0.054369889
LOC107392896	27.55466368	-1.600363847	0.547319414	-2.924003435	0.003455609	0.054369889
LOC107379646	19.61551014	-2.722235579	0.93123478	-2.923253766	0.003463941	0.054452658
LOC107389372	28.2950603	1.915635857	0.655385558	2.922914358	0.003467719	0.054463764
tnfsf13b	71.2927983	-2.35879173	0.807261532	-2.921967213	0.003478282	0.054581317
pter	718.48137	0.904795527	0.309718988	2.92134342	0.003485254	0.054642376
nfix	2222.260792	0.619467174	0.212099021	2.920650795	0.003493011	0.054646566
slc46a3	1565.518387	1.066429041	0.365153622	2.920494217	0.003494767	0.054646566
dnai1	16.09060718	1.610437894	0.551371063	2.920787839	0.003491475	0.054646566
pts	1220.754812	0.691484652	0.236853391	2.919462751	0.003506353	0.054753555
tmem88	131.8747967	0.697615902	0.238963936	2.919335506	0.003507785	0.054753555
LOC107374492	4359.835894	1.852623493	0.634863812	2.918143165	0.003521226	0.054915028
LOC107391419	15.45170281	1.400709671	0.480101682	2.917527104	0.00352819	0.054975274
LOC107388878	6.49216434	3.060494453	1.049563306	2.91596937	0.003545853	0.05520199
tirap	124.3769124	-1.767964202	0.606434884	-2.915340542	0.003553006	0.055216394
LOC107376066	25.76393378	-1.726321876	0.592100144	-2.915591043	0.003550155	0.055216394
LOC107387112	532.6366462	0.912412264	0.313180005	2.913379682	0.003575396	0.055515692
LOC107382629	5.092462972	3.05697553	1.050458852	2.910133532	0.003612744	0.055994381
myrf	18.71268687	-2.128337285	0.731413967	-2.909894233	0.003615511	0.055994381
LOC107388477	2709.374525	0.958301622	0.329327078	2.909878011	0.003615699	0.055994381
LOC107384414	1186.136805	2.049063713	0.704450637	2.908739956	0.003628886	0.056149565
LOC107394435	39.18791641	-1.892580947	0.650782086	-2.908163864	0.003635578	0.056204068
fa2h	211.5043182	0.863526326	0.297079928	2.906713793	0.003652472	0.056416059
LOC107393628	9.561073613	-2.7518129	0.947113038	-2.905474624	0.003666966	0.056590633
LOC107393576	243.0875572	-1.946064205	0.669889436	-2.905052835	0.003671911	0.056596628
dap	14155.15794	-0.868037067	0.298818518	-2.904897164	0.003673738	0.056596628
LOC107387982	229.5533481	-2.374851707	0.818008605	-2.903211157	0.003693575	0.056852842
LOC107379502	16.08880994	-2.601181985	0.896070457	-2.902876628	0.003697523	0.056864243
ptprq	45.66086157	1.096241233	0.377758781	2.901960954	0.003708348	0.056902884
LOC107386929	395.1678265	-2.06436921	0.711397654	-2.9018499	0.003709662	0.056902884
LOC107388705	27.93517244	-2.298214374	0.7918543	-2.90231975	0.003704103	0.056902884
LOC107378310	458.7277523	-2.281248492	0.786275248	-2.901335758	0.003715755	0.056947078
LOC107373330	13.12260338	-2.332975415	0.80458817	-2.899589507	0.003736516	0.057215812
prlr	350.6662037	1.262560907	0.435526908	2.898927443	0.003744415	0.057287293
LOC107384659	8.480288807	-2.052662341	0.708272074	-2.898126888	0.003753987	0.057384219
st6galnac6	120.5189568	-0.974538885	0.3363838	-2.897104097	0.003766248	0.057522053
LOC107390471	7.011344288	2.617341543	0.903604864	2.896555394	0.00377284	0.057573153
LOC107372463	2120.106807	0.743098008	0.256622898	2.89568083	0.00378337	0.057662778
clnk	13.34724699	2.272309807	0.784765375	2.895527606	0.003785217	0.057662778
arhgef19	11.90360317	-2.015809507	0.696886947	-2.892591853	0.003820774	0.058154483
LOC107373279	115.7253876	-1.401896004	0.485024911	-2.890358769	0.003848024	0.058519005
kansl3	1031.367377	0.798572213	0.276531509	2.887816355	0.003879263	0.058893056
ak1	129.4056831	-1.608759138	0.557037284	-2.888063661	0.003876214	0.058893056
slc11a2	1059.672448	-1.287727593	0.446317613	-2.885226925	0.003911316	0.059328878
lmna	105.2087544	-4.047224776	1.403255722	-2.884167663	0.003924497	0.059477939
wisp1	75.06081522	-1.32496031	0.45948176	-2.883597188	0.003931613	0.059484098
comt	4019.636346	0.847763219	0.293992126	2.883625591	0.003931259	0.059484098
plekha1	124.3636856	-0.685308184	0.237759254	-2.882361764	0.003947063	0.059666938
LOC107390877	414.9794697	1.11706716	0.387751484	2.880884296	0.003965612	0.059896277
LOC107378963	52.13678548	-3.348697897	1.162771561	-2.879927589	0.003977665	0.060027199
otud7a	10.09171292	2.062195795	0.716188592	2.879403302	0.003984285	0.060075965
angptl6	1020.725025	0.75476566	0.26221868	2.878382508	0.003997201	0.060219521
LOC107386406	27.11813675	-1.852737343	0.643750748	-2.878035248	0.004001604	0.060234674
csgr11h9orf84	168.792385	1.228844166	0.427020062	2.877719987	0.004005605	0.060243758
capn12	5.307722619	3.138105979	1.090739713	2.877043847	0.004014198	0.060321832
LOC107372738	137.4387259	-1.103191822	0.38356368	-2.87616341	0.004025413	0.060439133
habp2	137160.7277	1.025343452	0.35665882	2.874857971	0.004042093	0.060638231
LOC107396504	47.39160267	-1.967897015	0.684640648	-2.874350247	0.004048597	0.060684467
samd10	20.68026947	-1.793815007	0.624221663	-2.87368272	0.004057163	0.060761501
card14	6.181201964	3.52499849	1.227068492	2.872699049	0.004069816	0.06089956
LOC107385685	1010.143041	0.716211637	0.249357556	2.872227529	0.004075894	0.060939082
LOC107383849	16402.80427	0.724922595	0.25250384	2.870936913	0.004092572	0.061136887
LOC107374346	692.2461196	0.610385254	0.21266654	2.870151804	0.004102748	0.06123731
tmem221	15.30036414	2.004069865	0.698314329	2.869867881	0.004106433	0.061240771
LOC107376198	19408.78175	0.882013299	0.307493669	2.868394988	0.004125601	0.061474926
LOC107378669	1385.545846	-0.999254874	0.348600405	-2.866476511	0.00415069	0.061739243
LOC107379728	70.93399756	1.478451348	0.515815519	2.866240534	0.004153785	0.061739243
LOC107383155	11.37072651	1.979468088	0.690578331	2.866391835	0.0041518	0.061739243
LOC107395467	687.2635797	0.983811959	0.343358332	2.865263102	0.004166629	0.061878279
LOC107387018	96.12159306	-2.023092224	0.706874752	-2.862023603	0.004209456	0.062328645
prelp	37.34774675	0.966423076	0.337603307	2.862599557	0.004201812	0.062328645
LOC107381728	1927.905249	-0.992496199	0.346795501	-2.861906214	0.004211015	0.062328645
LOC107384718	756.0751954	0.84719647	0.296003909	2.862112436	0.004208276	0.062328645
gipc3	277.7086591	0.953761069	0.333688165	2.858240628	0.004259972	0.063000689
LOC107378593	5.817737151	-2.82105345	0.987257451	-2.857464835	0.004270399	0.06310227
LOC107383203	4518.325592	-1.071972768	0.375306116	-2.856262454	0.004286606	0.063260442
LOC107395692	8.982764873	-3.422514535	1.198300034	-2.856141566	0.004288239	0.063260442
LOC107397286	7.137626611	-2.447175457	0.857004818	-2.8554979	0.004296941	0.06333612
LOC107392943	276.5636205	0.755600183	0.264646122	2.855134164	0.004301865	0.063356041
LOC107387644	15.06543841	-1.86757488	0.654368406	-2.854011386	0.004317098	0.06342236
LOC107386288	10.31540896	1.935824239	0.6782696	2.854063101	0.004316396	0.06342236
LOC107383278	80.19422896	1.467316602	0.514072408	2.854299473	0.004313185	0.06342236
LOC107377226	31.29094035	1.32710099	0.465186809	2.852834527	0.004333118	0.063605005
ccdc174	276.1221898	0.569551927	0.199679209	2.852334648	0.004339938	0.063652431
nfatc1	15.46903694	1.607789679	0.563996732	2.850707441	0.004362209	0.063926183
LOC107379582	19.1256785	1.621715575	0.569053584	2.849846871	0.004374028	0.064046464
LOC107394933	24879.24449	-0.839596184	0.294656595	-2.849405705	0.004380099	0.064082435
nptx1	1297.637154	0.935530534	0.329188416	2.8419303	0.004484129	0.065550356
LOC107386876	338.6038334	-2.745562016	0.966370922	-2.841105784	0.00449574	0.065665944
LOC107381693	54.21169271	4.342573701	1.528995219	2.840148646	0.004509252	0.065809095
madd	631.5321398	-0.504247518	0.177613026	-2.839023287	0.004525185	0.065987326
LOC107396312	90.53263377	-0.995188316	0.350677777	-2.837899581	0.004541147	0.066165664
ptpn13	68.51977557	-1.136070303	0.400484528	-2.836739558	0.004557677	0.066301897
LOC107384079	16.6281556	-2.797871557	0.986396654	-2.83645686	0.004561714	0.066301897
LOC107396833	10.46885199	-3.041495081	1.072251895	-2.836549039	0.004560397	0.066301897
LOC107397303	8.566087463	-2.916169676	1.028373594	-2.835710381	0.004572389	0.066402621
mafb	52.5080542	-1.376814399	0.48576006	-2.834350764	0.00459189	0.06652238
rab11a	2995.113946	0.403582077	0.142377497	2.83459174	0.004588428	0.06652238
rps7	4159.740022	-0.599051662	0.211345817	-2.83446188	0.004590293	0.06652238
tsku	19247.16526	-0.639876734	0.225806124	-2.833743939	0.004600618	0.066594415
LOC107395925	4.841872495	2.806623868	0.990663057	2.833076139	0.00461024	0.066679268
c1qbp	3541.927967	-0.829782718	0.293108903	-2.830970704	0.004640697	0.067065071
dok3	17.48719699	-1.752943282	0.619320568	-2.830429625	0.004648554	0.067123903
wbp4	244.3539146	0.736898856	0.260395443	2.829922247	0.004655932	0.067175738
LOC107391030	3619.249022	0.689400225	0.243747947	2.82833244	0.004679119	0.067455395
acaa1	1738.070747	0.69426375	0.245516289	2.827770629	0.004687338	0.067518987
LOC107394598	61.10314675	-1.865948077	0.660615955	-2.824557993	0.004734588	0.068144248
dhh	25.77518071	1.893438979	0.670549411	2.823712835	0.00474709	0.06826877
csgr14hxorf21	49.3139195	-2.125187115	0.75290113	-2.822664264	0.004762642	0.068381508
LOC107378486	2059.019698	0.771553984	0.273322794	2.82286732	0.004759626	0.068381508
mybpc3	11.76668726	-3.012835837	1.067531332	-2.822245817	0.004768861	0.068415405
ccdc14	25.17851884	1.593791352	0.565034815	2.820695838	0.004791961	0.068691237
slc12a9	175.2768696	-1.202594001	0.426419946	-2.820210479	0.004799216	0.068739658
LOC107395334	215.8036229	0.670551256	0.237902025	2.81860256	0.00482332	0.06898014
LOC107376958	3.933112574	-2.96980256	1.053751954	-2.818312744	0.004827676	0.06898014
LOC107372690	5.482724957	2.830104426	1.004147025	2.818416382	0.004826118	0.06898014
LOC107397045	7211.945683	-0.737184221	0.261610215	-2.817872459	0.004834301	0.069019181
LOC107382270	92.85340328	1.452017729	0.515355974	2.81750441	0.004839845	0.069042745
kiaa0513	57.8099115	-1.346935946	0.478196706	-2.816698506	0.004852005	0.069160571
LOC107379316	4114.520783	2.227705724	0.791175343	2.815691545	0.004867237	0.069321969
lrrc10	4.955428003	-2.800083542	0.995459337	-2.812855773	0.004910367	0.069880119
LOC107383208	27.91792975	-2.097684881	0.746025493	-2.81181394	0.004926299	0.070050629
tmem255a	52.57624095	-1.138449962	0.405252415	-2.80923671	0.004965912	0.070557332
LOC107385699	716.1367787	-0.656832961	0.233888133	-2.808321019	0.004980056	0.070701638
LOC107377528	5.249747834	3.177252251	1.131845411	2.807143291	0.0049983	0.070792828
LOC107374994	710.9221612	1.288780839	0.459070142	2.807372383	0.004994747	0.070792828
ddc	13.31273563	-3.158160517	1.125151391	-2.806876071	0.005002448	0.070792828
LOC107379340	48917.20631	0.920516249	0.327921985	2.807119657	0.004998667	0.070792828
LOC107375940	368.7742627	1.553266393	0.553540447	2.806057629	0.005015172	0.070916295
LOC107386115	102.7899898	1.003168712	0.357659525	2.804814754	0.005034551	0.071133586
LOC107391212	24.36525226	1.791981002	0.639091816	2.803949223	0.005048085	0.071268034
tfr2	9126.678497	0.63703661	0.227354328	2.801955056	0.005079395	0.071653008
LOC107375032	3.457729884	2.782010708	0.993269049	2.800863181	0.005096612	0.071838735
pgam2	16.25175608	-3.186694374	1.138496106	-2.799038448	0.005125503	0.072147182
casp6	515.6689814	0.965134689	0.344818134	2.79896732	0.005126633	0.072147182
ncf1	159.1042123	-2.071919101	0.740418014	-2.798309958	0.005137079	0.072236863
LOC107384573	25719.01515	0.67392364	0.240910848	2.797398481	0.005151595	0.072383589
LOC107386187	2063.517133	0.845608394	0.30234831	2.796802119	0.005161113	0.072402579
LOC107382288	1294.931039	-0.917585374	0.32805677	-2.797032277	0.005157438	0.072402579
gpx8	74.96759125	-0.954286543	0.3416121	-2.793479922	0.005214427	0.073092658
LOC107380366	110.3091663	-1.487248378	0.532574492	-2.792564047	0.005229211	0.073138224
LOC107373957	530.1780381	0.818036802	0.292939394	2.792512097	0.005230051	0.073138224
uckl1	146.8950525	-0.713172141	0.255368413	-2.792718696	0.005226712	0.073138224
LOC107376319	7.908000873	-2.277769461	0.815973888	-2.791473471	0.005246866	0.073315544
csgr18h8orf4	172.0030377	-1.499384849	0.537249689	-2.790852895	0.005256936	0.073398415
LOC107382284	34138.8009	1.040996222	0.373259307	2.78893574	0.005288156	0.073676426
LOC107381121	10.06637328	2.353477539	0.84388367	2.788864892	0.005289313	0.073676426
sgtb	18.45672314	1.505375413	0.539745347	2.789047505	0.005286331	0.073676426
scarf2	49.47409267	1.509849215	0.541491492	2.788315675	0.005298289	0.07374353
LOC107376133	17832.90501	0.895439316	0.321199621	2.787796929	0.00530678	0.073803779
ube2j1	39.10321356	-1.158093223	0.415524554	-2.787063272	0.005318809	0.073913109
LOC107388236	160.7809774	0.973849318	0.349463933	2.786694782	0.005324861	0.073939255
LOC107389240	5.82330982	2.304143279	0.827036092	2.786025061	0.005335875	0.074034217
LOC107395473	5.521439188	-2.799436879	1.005048987	-2.785373565	0.005346609	0.074125148
msrb3	700.1201086	-0.751187351	0.269731435	-2.784945519	0.005353672	0.074165084
p4hb	23282.61181	-0.89081981	0.320039177	-2.783471132	0.005378065	0.074444844
fscn2	27.49959165	1.283815935	0.461460805	2.782069292	0.005401351	0.074708853
syt7	4.970926484	-2.805849315	1.008801773	-2.781368343	0.005413028	0.07477034
LOC107382745	13.41214967	1.74813767	0.628533416	2.781296311	0.005414229	0.07477034
enpp6	901.6417946	-0.880372786	0.316612057	-2.780604105	0.005425786	0.074871624
LOC107373901	55.44033944	1.208147917	0.434647995	2.779600805	0.005442576	0.07504491
bmpr1b	18.37253128	-1.821894593	0.655532428	-2.779259292	0.005448302	0.075065489
apeh	507.035229	-1.36013321	0.489577734	-2.778176206	0.005466497	0.075257699
LOC107391932	13.48270985	2.536334267	0.91350443	2.776488195	0.005494963	0.075590911
pcdh9	8.711735947	2.163697416	0.779439562	2.775965608	0.005503803	0.075618219
LOC107378392	23.07774197	-1.704822579	0.614158657	-2.775866725	0.005505477	0.075618219
LOC107377368	1112.582009	-0.650479248	0.234449686	-2.774494003	0.005528765	0.075814369
LOC107381549	52.93268553	-2.348652212	0.846543439	-2.774402473	0.005530321	0.075814369
LOC107395342	28.22541156	-2.837274258	1.022710446	-2.774269363	0.005532585	0.075814369
ftcd	26677.85326	0.695214656	0.250688469	2.773221509	0.005550433	0.076000208
rps23	1389.679471	-0.621322813	0.224217417	-2.771072915	0.005587191	0.076444504
LOC107388422	956.4460699	1.104250565	0.398677094	2.769786831	0.005609299	0.076687811
LOC107393252	45.76414924	-2.406905512	0.869573785	-2.767914066	0.005641633	0.077070443
LOC107385470	361.310729	-1.385001817	0.500466487	-2.767421703	0.005650162	0.077077672
ralb	206.8457158	0.604888151	0.218577784	2.76738166	0.005650856	0.077077672
nat16	5.760000608	2.950840824	1.066421827	2.767048413	0.005656635	0.077097201
mid1ip1	148.9315509	-1.39067285	0.503100022	-2.76420749	0.005706124	0.077711977
sdf2	3433.082846	-1.109844741	0.401576693	-2.763718014	0.00571469	0.077768907
LOC107385822	3.534677858	-2.974591276	1.076527817	-2.763134616	0.005724915	0.077848307
LOC107380239	146.1094118	0.860432228	0.311428744	2.762854245	0.005729835	0.077855501
LOC107387232	330.2918893	-0.847581079	0.306805218	-2.762603207	0.005734243	0.07785574
LOC107391082	51.49729611	1.450637456	0.525203263	2.762049586	0.005743975	0.077868633
LOC107389180	47.37694258	1.305629281	0.472700789	2.762062836	0.005743742	0.077868633
naxe	1333.446784	0.423637692	0.153421217	2.761271885	0.005757672	0.077994687
LOC107383454	1758.878443	0.748450551	0.271083695	2.760957465	0.005763218	0.078010217
LOC107393231	30.38217504	1.35222076	0.489820967	2.760642871	0.005768772	0.078025831
LOC107381616	2176.344791	-0.631524651	0.228843071	-2.75964069	0.005786497	0.078205912
LOC107390140	10.11082511	-2.29793886	0.83287209	-2.759053748	0.0057969	0.078269904
LOC107390560	115.0547604	-1.070556637	0.388040912	-2.758875687	0.005800059	0.078269904
LOC107380992	5.405999858	-2.755738961	0.999221996	-2.757884606	0.005817673	0.078388282
mybpc1	3.387478064	-3.055987388	1.108016103	-2.758071276	0.005814352	0.078388282
LOC107384001	31.77240684	1.261694835	0.457693401	2.756637595	0.005839904	0.078628073
map2k1	828.9345118	0.856158444	0.310657732	2.755954079	0.005852121	0.078715812
LOC107396619	230.7632608	-1.835813415	0.666169189	-2.755776529	0.005855299	0.078715812
LOC107384742	13.98633086	2.295619667	0.833243924	2.755039193	0.005868511	0.078773981
LOC107388227	50.32416973	-1.267049321	0.45986615	-2.755256767	0.005864609	0.078773981
LOC107387302	13.40017713	1.553371538	0.563922669	2.754582539	0.005876706	0.078824326
nt5dc2	583.0982539	1.143543057	0.415659779	2.751151582	0.005938616	0.07937746
lhpp	1251.330067	1.152589159	0.418828748	2.751934207	0.005924442	0.07937746
mmp14	92.12895067	-1.423825235	0.517525239	-2.75121893	0.005937395	0.07937746
bbox1	300.0258398	0.936586115	0.34035952	2.751755308	0.005927679	0.07937746
LOC107384247	79.73451225	-1.230526558	0.447292254	-2.751057162	0.005940328	0.07937746
cyfip1	1438.554512	-0.625473873	0.22742356	-2.750259798	0.005954803	0.079510971
LOC107383147	16716.14875	0.648382315	0.235810785	2.749587193	0.005967039	0.079554531
arhgap9	31.30481896	-1.950724881	0.709414923	-2.749765783	0.005963788	0.079554531
LOC107396549	3.260608516	2.950152531	1.073159304	2.74903504	0.0059771	0.079628798
fibin	22.42144056	-1.687600539	0.613997023	-2.748548406	0.00598598	0.079647841
vasn	29.84687899	1.870948095	0.680724863	2.748464464	0.005987512	0.079647841
frmpd2	3.718264018	-3.307098065	1.20363333	-2.747595951	0.006003394	0.079754634
ncf4	156.8019579	-1.518841564	0.552801823	-2.747533566	0.006004536	0.079754634
LOC107377763	96.04205573	-2.107200325	0.767464867	-2.745663569	0.006038866	0.080150572
LOC107375787	21.30828585	-1.739806266	0.633952158	-2.744381014	0.006062513	0.080404246
cables1	544.4979141	1.200036706	0.437471493	2.743119779	0.006085848	0.080653408
LOC107389945	16.96787567	-2.591395986	0.944887864	-2.742543411	0.006096539	0.080734751
LOC107395826	43.08815118	2.325181377	0.848636906	2.739901317	0.006145763	0.081325878
LOC107396771	12.28792682	1.465583916	0.535041106	2.739198727	0.006158913	0.081439113
nol8	270.0488014	-0.778373237	0.284198908	-2.738832608	0.006165776	0.081469102
LOC107397255	9.171597597	-2.382224017	0.869978643	-2.738255744	0.006176602	0.081551387
LOC107379946	3735.49335	0.800327294	0.292324783	2.737801724	0.006185135	0.081603289
ptpre	5.55457163	-2.999662039	1.095993478	-2.736934205	0.006201469	0.081757961
LOC107380692	141.5569368	-1.806809663	0.660301879	-2.736338818	0.006212702	0.081845197
LOC107390070	4.396077587	-3.031034335	1.107911707	-2.735808564	0.006222722	0.081916331
LOC107373694	70.54945929	1.218327577	0.445457522	2.735002816	0.006237974	0.082056201
mlf1	37.53238811	1.500520068	0.549014714	2.733114485	0.006273852	0.082466972
LOC107396906	15.11867228	-2.024414796	0.740836284	-2.732607515	0.006283516	0.082532819
LOC107390484	40.2224219	-2.413026788	0.883271519	-2.731919615	0.00629665	0.082644116
LOC107378934	15.11959212	1.720064206	0.630406628	2.728499558	0.006362318	0.083444242
LOC107391589	62.16990599	1.152884786	0.422627601	2.727897524	0.006373941	0.083473201
apbb1	40.60651008	-1.371201892	0.502645181	-2.727971827	0.006372505	0.083473201
LOC107392561	168.6270664	-2.162651783	0.793049573	-2.727007059	0.006391167	0.083513763
LOC107376256	639.4339206	0.746439027	0.273705729	2.727158941	0.006388226	0.083513763
LOC107373445	33.52568592	-1.323526942	0.48528649	-2.727310506	0.006385292	0.083513763
LOC107375815	168.4491729	-1.198869959	0.4397147	-2.726472325	0.006401532	0.083587604
LOC107377349	244.2923573	0.856089965	0.31404683	2.725994611	0.006410804	0.083647083
mme	11.92125986	2.196206454	0.805813319	2.725453157	0.006421329	0.083722795
upb1	1731.898668	0.681123268	0.250129372	2.723083912	0.006467563	0.084263647
msi2	184.373913	1.037718022	0.381393449	2.720859588	0.006511241	0.084770432
odf3b	5.369241019	2.954695706	1.086558773	2.719315125	0.006541725	0.085104822
LOC107392046	27.15936048	1.328854938	0.488820968	2.718490048	0.006558063	0.085117433
acod1	167.3391001	-3.948317055	1.452448775	-2.71838644	0.006560117	0.085117433
smoc2	312.9628287	1.142200962	0.420127466	2.718701003	0.006553882	0.085117433
LOC107376027	3.993333802	3.055193848	1.123936831	2.718296763	0.006561895	0.085117433
LOC107375910	9194.837844	-2.056316211	0.756634802	-2.717712966	0.006573484	0.085205418
LOC107377655	110.6836489	1.099739707	0.404805023	2.716714579	0.006593344	0.085378307
ttc33	329.3716827	0.594829996	0.218964537	2.716558602	0.006596452	0.085378307
slc2a4	13.62915158	1.423633777	0.524134766	2.716159793	0.006604403	0.085418877
adam32	85.07098351	-1.844096155	0.679227229	-2.714991503	0.006627747	0.085658317
LOC107373792	5.313893334	-2.759430419	1.016525812	-2.714569946	0.006636188	0.085704948
renbp	68.70663716	-1.555456464	0.573105448	-2.71408424	0.006645926	0.085768244
LOC107377393	22.39904436	-2.76932917	1.020546285	-2.71357528	0.006656144	0.085837637
rps29	782.70075	-0.787751983	0.290536073	-2.711374098	0.006700498	0.086298187
khk	2127.752486	0.906317204	0.334301245	2.711079357	0.006706457	0.086298187
alox15	16.8993677	-2.444452845	0.901646455	-2.711099046	0.006706059	0.086298187
mark1	69.99194072	1.356068359	0.500665619	2.708531021	0.006758179	0.08690068
trib2	1049.680694	1.399735982	0.516884652	2.708023881	0.006768515	0.086907539
LOC107380963	1031.574529	0.558976694	0.206401196	2.708204723	0.006764828	0.086907539
dennd4c	102.831067	1.354604886	0.500415214	2.706961833	0.006790206	0.087122966
LOC107377064	23.44528974	-1.744648531	0.644760931	-2.705884379	0.006812276	0.087296504
LOC107397157	1322.295024	-0.707563348	0.261496739	-2.705820921	0.006813578	0.087296504
LOC107372467	34.15064752	-0.981742541	0.362888735	-2.705354137	0.006823161	0.087356162
ift172	63.89837672	-1.418473538	0.524463204	-2.704619749	0.006838262	0.087486333
sik2	319.4051255	1.715695408	0.634417562	2.704363044	0.006843547	0.087490831
LOC107389295	62.42374206	-1.08614901	0.401894705	-2.702571087	0.006880547	0.087837192
LOC107379354	10.96701813	-2.262230318	0.837027357	-2.702695795	0.006877966	0.087837192
rapgefl1	32.99360356	-1.166466513	0.431916436	-2.700676368	0.006919864	0.088275556
LOC107384934	16648.99769	-0.693571683	0.256854721	-2.700248919	0.006928761	0.088325519
LOC107373394	2419.524174	-1.981710889	0.734134081	-2.699385494	0.006946766	0.088491415
banp	386.0389663	0.968460112	0.35890535	2.6983719	0.006967955	0.088507003
a1cf	22205.72383	0.612446698	0.226935968	2.698764345	0.006959744	0.088507003
mccc2	600.8895738	0.563704769	0.208864209	2.698905538	0.006956792	0.088507003
LOC107376235	92.6157355	-1.014731457	0.376025176	-2.698573185	0.006963742	0.088507003
aars	1326.30954	-0.63515819	0.235410824	-2.698084053	0.006973983	0.088520162
gabra4	110.2013341	-0.822854458	0.305018377	-2.697720923	0.006981594	0.088553383
ptx3	114.0475899	-2.856407263	1.059252965	-2.696624281	0.007004625	0.088781999
bmper	125.9570356	1.767063326	0.655436844	2.696008534	0.007017587	0.08888275
LOC107390586	729.7409984	-1.639563628	0.608401414	-2.694871496	0.007041578	0.088972729
LOC107383890	1099.520699	0.612865594	0.227528256	2.693580153	0.007068915	0.088972729
LOC107381681	5.6547919	2.516156115	0.934228097	2.69329955	0.007074867	0.088972729
csgr03h7orf55	1202.525532	0.617851447	0.229343338	2.694002157	0.007059971	0.088972729
ccr7	7.988523967	2.16728602	0.80427802	2.694697561	0.007045255	0.088972729
LOC107393718	108.7631141	-1.085951632	0.402923603	-2.695179992	0.007035062	0.088972729
ybx2	6663.753445	1.160758362	0.430900647	2.693795823	0.007064343	0.088972729
tpm4	608.5226784	0.757719842	0.281322154	2.693423998	0.007072227	0.088972729
LOC107383528	86.36548665	-1.18080925	0.438205011	-2.694650265	0.007046255	0.088972729
LOC107389472	1537.668382	1.433561278	0.532243723	2.693430128	0.007072097	0.088972729
sostdc1	6.031237332	-2.033316184	0.755059942	-2.69292022	0.007082922	0.089007304
LOC107393708	9.518541688	-2.600581595	0.9657905	-2.692697429	0.007087656	0.089007304
gpr6	36.35592532	-1.805574427	0.670691974	-2.692106804	0.00710022	0.089101987
hpgd	615.2115732	0.630113906	0.234089197	2.69176841	0.007107428	0.08912936
mrpl30	706.1051363	0.539010652	0.200297135	2.691055226	0.00712264	0.089193967
LOC107394262	366.2934971	0.717292667	0.266539287	2.691132984	0.00712098	0.089193967
LOC107392087	117.5138493	1.097053966	0.408075131	2.688362711	0.007180336	0.089853006
rps11	1914.193111	-0.689739336	0.256651761	-2.68745218	0.007199941	0.090034806
hyi	3889.747092	0.758998503	0.282572478	2.686031237	0.007230633	0.090354885
anxa4	8225.797477	0.634850012	0.236477609	2.684609396	0.007261462	0.090676222
LOC107390408	5261.324276	0.635367336	0.236778221	2.683385881	0.007288084	0.090816804
mprip	1358.476835	1.092002223	0.406916202	2.683604679	0.007283317	0.090816804
LOC107395748	6.505463006	-2.992305803	1.114933837	-2.683841591	0.007278158	0.090816804
st5	175.9349456	0.827852638	0.308577902	2.682799488	0.007300875	0.090912299
LOC107379566	32.8036533	-2.122975599	0.791580361	-2.681945769	0.007319532	0.091080666
inpp1	130.1950725	-0.940790644	0.350893907	-2.681125622	0.007337497	0.091240174
LOC107396670	375.1659235	-1.637096926	0.611016939	-2.679298759	0.007377654	0.091675229
LOC107396299	324.0953389	0.704870265	0.26318015	2.678280508	0.007400122	0.091840804
rps10	1506.644453	-0.559603704	0.208945701	-2.678225502	0.007401337	0.091840804
LOC107392575	264.0533438	0.931248847	0.348038675	2.675705068	0.007457224	0.092404955
LOC107391811	8.152605781	2.058931692	0.769443776	2.675870227	0.00745355	0.092404955
LOC107383014	1216.595974	1.233828694	0.461208747	2.675206619	0.007468321	0.092413302
LOC107375799	140.0880397	-2.226120759	0.832076151	-2.675381042	0.007464436	0.092413302
LOC107375461	5850.787381	0.637925362	0.238574624	2.673902827	0.007497417	0.09261974
LOC107374153	4.054610627	2.744925795	1.026617452	2.67375719	0.007500674	0.09261974
LOC107373648	1894.287054	0.710353371	0.265671858	2.673799842	0.00749972	0.09261974
LOC107387972	350.2105679	-2.179717347	0.815533059	-2.672751671	0.007523192	0.092833152
LOC107396121	170.6352699	1.390687425	0.520412258	2.672280302	0.007533769	0.092840126
LOC107397302	17.13872332	1.374252103	0.514265899	2.672259828	0.007534229	0.092840126
dcun1d4	129.0692447	0.872898606	0.326745287	2.671495629	0.007551406	0.092987169
LOC107387639	11.20256716	-1.931475866	0.723109403	-2.671070046	0.007560987	0.093040539
oplah	1907.916359	0.868930322	0.32558461	2.668831064	0.007611572	0.093598059
LOC107375947	4.744335021	2.352742414	0.881737345	2.668303013	0.007623547	0.093615466
LOC107374605	23.55231037	1.645785014	0.616771426	2.668387259	0.007621635	0.093615466
asmtl	5377.30905	0.957353931	0.358894259	2.667509741	0.007641567	0.093771815
LOC107388671	172.7948093	-1.069551876	0.401014582	-2.667114675	0.007650556	0.093817194
LOC107373956	43.89803897	-1.919721833	0.71986849	-2.666767415	0.007658465	0.093849278
LOC107392502	33.30580059	3.730845094	1.399363913	2.666100691	0.007673671	0.093970668
aldh4a1	13546.38812	0.535420727	0.200850484	2.665767668	0.007681276	0.093998882
LOC107375673	1716.180771	0.678129042	0.254426697	2.66532188	0.007691466	0.094058678
LOC107384285	1275.735971	0.686311751	0.257607644	2.664174641	0.007717748	0.094315034
LOC107383032	900.2371679	1.068441716	0.401243349	2.66282723	0.007748719	0.094628293
LOC107379570	10.78511255	-2.556525792	0.960681375	-2.661158902	0.00778722	0.095033021
LOC107389093	7.30731685	-3.467839568	1.304239339	-2.658898151	0.007839666	0.095607259
LOC107396045	1363.186386	1.162775488	0.437430176	2.658196787	0.007856001	0.095740621
otor	41.90750823	-1.140458602	0.429192919	-2.657216726	0.007878877	0.095953471
nr2f1	322.161585	-0.765359886	0.28807383	-2.656818513	0.00788819	0.096000946
LOC107388448	9.857414994	-2.409163918	0.907010767	-2.656158013	0.007903657	0.096123215
LOC107379168	7.441001442	1.962512883	0.73901075	2.655594502	0.007916875	0.096217974
LOC107386308	902.5185599	0.987191758	0.371985026	2.653848112	0.007957964	0.096651107
LOC107373434	226.9732807	-1.476672133	0.556628252	-2.6528875	0.007980646	0.096860249
LOC107381889	19.54963306	-2.743337243	1.034198619	-2.652621259	0.007986943	0.09687037
LOC107394196	30.43664137	1.692351865	0.638108793	2.65213688	0.007998411	0.096943146
LOC107382034	40.0555986	-4.269521853	1.610468028	-2.651106249	0.00802286	0.097040485
flt1	152.2899642	0.668097645	0.252002881	2.651150826	0.008021801	0.097040485
LOC107396355	14.86530119	-2.924319639	1.10293158	-2.65140621	0.008015737	0.097040485
scml4	34.77683722	1.369843975	0.516956233	2.649825819	0.008053328	0.09734261
LOC107392173	39.83486814	-2.573782292	0.971505769	-2.64927124	0.008066556	0.097436086
sepp1	100888.6843	0.885947048	0.334464358	2.64885339	0.008076536	0.097489512
afap1	39.86102706	0.997376048	0.376563586	2.648625852	0.008081975	0.097489512
LOC107388919	123.0514377	0.707179562	0.26702436	2.648370967	0.008088072	0.09749673
fgf21	13.0905202	-3.443480331	1.300433791	-2.647947442	0.008098211	0.097552639
LOC107388209	3.575711551	-2.690768665	1.016423356	-2.647291257	0.008113944	0.097675796
smc5	134.2993819	1.118374297	0.423081479	2.643401693	0.00820776	0.098738123
LOC107385635	40.38223218	1.02295458	0.387146829	2.642290995	0.008234727	0.098995378
LOC107382997	58.77081902	0.846058623	0.320275099	2.641662204	0.008250029	0.09911214
swap70	38.25332821	-2.053568297	0.777512529	-2.641202838	0.008261224	0.099179438
LOC107383573	128.4567748	0.934258926	0.353798931	2.640649373	0.008274731	0.099274374
chrd	5.55244048	2.731727724	1.035057737	2.639203231	0.008310115	0.099579022
spns1	928.2234562	-0.596706359	0.226097708	-2.639152626	0.008311355	0.099579022
tnk1	163.7323504	-1.008631491	0.382301347	-2.638315294	0.008331908	0.099757856
tacr3	120.2722759	0.882258475	0.334444824	2.637979161	0.008340171	0.099789411
LOC107376954	5.936572921	-2.302840113	0.873254888	-2.637076693	0.008362392	0.099987822
hadh	1871.086904	0.631504994	0.239525322	2.636485311	0.008376983	0.100094782
LOC107379182	367.6180228	-0.736322672	0.279340936	-2.635928276	0.008390747	0.100191729
dpy19l1	2313.898518	0.580768408	0.220362443	2.63551448	0.008400984	0.100240044
ipmk	242.3746171	1.01896894	0.386660297	2.635307915	0.008406099	0.100240044
LOC107378574	55.77179203	0.990471546	0.375916723	2.634816395	0.008418281	0.100279242
hhip	283.0882042	1.140296746	0.432813344	2.634615502	0.008423264	0.100279242
fermt1	67.24761232	1.32168183	0.501683927	2.634491079	0.008426352	0.100279242
LOC107378291	138.0918756	0.957667352	0.363576301	2.634020282	0.008438045	0.100351046
LOC107376618	43.66165815	-2.217652051	0.842179991	-2.633228139	0.008457752	0.100517996
LOC107389892	5.469619525	2.872169481	1.091549731	2.631276798	0.008506472	0.100557844
dab1	143.810785	0.891786387	0.338900146	2.631413404	0.008503053	0.100557844
LOC107396446	106.2148843	-0.701913233	0.266602872	-2.632804472	0.008468308	0.100557844
LOC107384458	4.065414373	3.052254986	1.159417664	2.632575888	0.008474009	0.100557844
LOC107379353	350.7859889	-1.991087995	0.756540705	-2.631831946	0.008492586	0.100557844
LOC107392979	166894.4648	0.74478822	0.282953816	2.632190049	0.008483639	0.100557844
parp4	101.1997726	-0.793662	0.301604328	-2.631467548	0.008501699	0.100557844
LOC107392345	22301.35891	0.585841931	0.222599378	2.631821962	0.008492835	0.100557844
LOC107373971	38.7452824	-1.741979377	0.662099545	-2.630993163	0.008513575	0.100574757
grtp1	128.0273588	0.913034915	0.347091643	2.630529812	0.008525189	0.10064491
zhx3	652.8333124	0.965921562	0.367278057	2.629946287	0.008539836	0.100750746
bmp1	2123.846593	0.894540669	0.340254836	2.629031461	0.008562844	0.100850471
pitpnc1	8.603006506	-1.789403612	0.680565522	-2.629289251	0.008556355	0.100850471
csmd2	8.538352474	-2.219969106	0.844437663	-2.628931895	0.008565351	0.100850471
LOC107396996	98.96975448	-1.039848189	0.395911737	-2.626464667	0.008627695	0.101517111
scai	56.47843057	1.100721593	0.419231632	2.625569037	0.008650426	0.101658583
LOC107392001	590.0711665	0.653149386	0.248767713	2.625539212	0.008651184	0.101658583
slc38a9	7035.433951	0.518912736	0.197787102	2.623592394	0.008700784	0.102027016
cd248	11.56915021	-1.936743963	0.73813591	-2.623831109	0.008694689	0.102027016
slc6a9	29.51865162	-1.366218486	0.520780479	-2.623405719	0.008705554	0.102027016
LOC107393471	3.861161097	2.833783008	1.080092413	2.623648657	0.008699347	0.102027016
LOC107376372	56.33040612	-1.747684633	0.666688686	-2.621440368	0.008755908	0.102481689
LOC107374544	10.73470416	-1.946086457	0.742372917	-2.621440536	0.008755904	0.102481689
LOC107386077	24.33857078	-1.586967202	0.605590445	-2.620528799	0.008779351	0.102688298
LOC107383107	157.9381674	1.418906159	0.541573623	2.619969105	0.008793773	0.102753827
LOC107386140	1377.997149	0.688098168	0.262646754	2.619861692	0.008796544	0.102753827
LOC107393297	11.11699449	2.933375827	1.120411354	2.618123974	0.008841468	0.103210602
LOC107394512	511.4924432	0.660084575	0.252180335	2.617510103	0.008857387	0.103328408
pgr	9.826682445	-1.84637352	0.705471018	-2.617220939	0.008864894	0.103347996
LOC107384781	42.13662062	-1.412746599	0.539950116	-2.616439105	0.008885221	0.103516913
rbm47	836.0354367	0.945373345	0.361386441	2.615962411	0.008897635	0.103525504
gorab	140.6602285	-0.739105589	0.282518316	-2.616133353	0.008893182	0.103525504
LOC107384490	3099.609196	0.628446807	0.240260694	2.61568714	0.008904811	0.103541053
LOC107372956	39.61215423	-1.91973669	0.734374596	-2.614110974	0.008945997	0.103747826
LOC107375570	3.765686522	-2.659159667	1.017109245	-2.614428764	0.00893768	0.103747826
spata18	5.045951167	2.44936463	0.936939323	2.614219054	0.008943168	0.103747826
schip1	85.87674898	-1.244698392	0.476028882	-2.614753937	0.008929176	0.103747826
fmnl2	74.82012321	-1.4126499	0.540789391	-2.61219973	0.008996168	0.104193371
col4a2	87.92071096	-1.168529164	0.447298548	-2.61241439	0.008990521	0.104193371
nefm	12.27801585	2.395069511	0.917457293	2.610551497	0.009039636	0.104492064
fah	9838.401386	0.865056533	0.331360003	2.610624476	0.009037707	0.104492064
LOC107380763	9.531351534	-2.552896733	0.977750086	-2.610991059	0.009028025	0.104492064
LOC107388496	17.9744017	-2.44344858	0.936602994	-2.608841307	0.009084936	0.10494729
LOC107391705	47.04699149	-1.105991256	0.424064485	-2.608073286	0.009105346	0.105114578
LOC107372553	159.5369195	-0.871196231	0.334170618	-2.60704019	0.009132864	0.105363659
fam101b	29.62412812	1.358610362	0.52126369	2.606378285	0.009150534	0.105498874
naxd	1840.580967	0.500306897	0.191988792	2.605917205	0.009162861	0.10557235
LOC107381196	23.47673797	-1.679580496	0.644591656	-2.605650383	0.009170001	0.10558601
LOC107380820	3629.158858	-1.148247343	0.440734336	-2.605304938	0.009179252	0.105623948
LOC107393220	1329.963342	-1.066486831	0.409409929	-2.604936411	0.009189131	0.10566905
LOC107392692	2434.293362	0.593319769	0.227804088	2.60451766	0.009200368	0.105729698
LOC107392984	166.4722759	-1.363983411	0.523968557	-2.603177984	0.009236399	0.106075017
mmp2	165.4934552	-1.231125483	0.473035076	-2.602609288	0.009251732	0.106182341
chac1	10509.32151	-1.333900627	0.512732783	-2.601551277	0.009280319	0.106441538
insig2	3861.614507	0.434734015	0.167201205	2.600065085	0.009320608	0.106834533
LOC107377659	108.2224619	1.639336277	0.630621162	2.599557986	0.009334391	0.106923395
gbe1	4286.459907	0.655905745	0.252335984	2.599334961	0.009340458	0.106923824
LOC107392078	69.18080687	-1.562053727	0.601078984	-2.59874953	0.009356402	0.106968222
LOC107382653	41.91985563	-1.284148027	0.49413611	-2.5987739	0.009355737	0.106968222
lgsn	3.904321332	2.523454452	0.971678642	2.597005166	0.009404051	0.107443706
lrrc2	15.99821985	-2.685568973	1.035049663	-2.594628131	0.009469331	0.108119883
LOC107376503	102.7109318	-1.000211829	0.385619734	-2.593777605	0.009492787	0.108317952
LOC107375876	79.65272687	-0.76762483	0.296314775	-2.590572238	0.009581651	0.10926163
trim33	1017.82732	-0.621244466	0.239893857	-2.589663916	0.009606967	0.109479913
rpl28	2522.522786	-0.480677254	0.185632729	-2.589399271	0.009614355	0.109493729
vipas39	227.5726738	-0.659151331	0.254585114	-2.589119688	0.009622164	0.109512336
LOC107388454	117.945456	-1.006424924	0.388804085	-2.588514273	0.009639095	0.109634661
LOC107391873	57.05199313	-1.345401259	0.519859863	-2.588007565	0.009653286	0.109725685
LOC107390259	4.686578736	2.49194164	0.96347762	2.586403243	0.00969834	0.110167173
ptprz1	7.522028132	1.99130279	0.770466116	2.584542979	0.009750815	0.110409612
LOC107377468	540.9232715	-0.757606937	0.293128342	-2.5845571	0.009750416	0.110409612
LOC107386118	25.31004968	-1.239030703	0.479363545	-2.584741199	0.009745212	0.110409612
ca6	22.2137843	-1.897144027	0.73391392	-2.584968039	0.009738802	0.110409612
pkn2	698.01869	0.507056371	0.196162331	2.584881457	0.009741248	0.110409612
ap3s1	396.8155861	-0.768049598	0.297389515	-2.582638456	0.009804801	0.110893108
LOC107381276	15.54306497	-1.743195415	0.675035614	-2.582375477	0.009812277	0.110893108
osr2	5.974002355	2.193032313	0.849197421	2.582476416	0.009809407	0.110893108
glis1	23.44664976	1.66535317	0.645170724	2.581259671	0.009844051	0.110941656
LOC107379127	32.56053267	1.467394683	0.568474209	2.581286295	0.009843291	0.110941656
msx1	13.1223783	-1.664286291	0.644573879	-2.581994624	0.009823112	0.110941656
LOC107379569	1196.920337	-0.58916298	0.228277491	-2.580907027	0.009854112	0.110941656
slc25a21	378.4917994	0.734856023	0.28465902	2.581530782	0.009836322	0.110941656
tgm1	5.68108468	2.868086088	1.111260978	2.580929364	0.009853474	0.110941656
LOC107385988	4.091221435	-2.598823242	1.007104503	-2.580490142	0.009866017	0.111005215
mdga2	26.50916529	-1.89662835	0.736026328	-2.576848514	0.009970564	0.112033228
rrad	9.571581087	-2.651380948	1.028877928	-2.576963578	0.009967245	0.112033228
LOC107375289	5945.862978	-1.219591625	0.473324835	-2.576648287	0.00997634	0.112033228
LOC107378854	14.59405893	1.769203623	0.686847913	2.575830238	0.009999973	0.11215656
LOC107389078	6.838520071	-2.858749683	1.109743407	-2.576045655	0.009993745	0.11215656
LOC107377245	3.692319302	-2.881378624	1.119310085	-2.57424521	0.010045905	0.112600495
LOC107386321	223.9545248	-1.862774842	0.723776168	-2.573689112	0.010062064	0.112710373
slco5a1	19.15749401	-1.554329098	0.604112674	-2.572912577	0.010084668	0.112892253
pdia5	4291.079248	-0.613006328	0.238376481	-2.571588968	0.0101233	0.113181814
LOC107390436	13.29676824	-1.38449959	0.538368881	-2.571656048	0.010121339	0.113181814
rps14	2278.197622	-0.603547235	0.234778288	-2.570711458	0.010148985	0.113397477
LOC107389160	11.22745072	1.836573515	0.715010332	2.568597169	0.010211108	0.114019753
LOC107381011	209.4611804	-1.640917826	0.638980597	-2.568024497	0.010227993	0.114136418
LOC107376382	9.597589469	2.127704135	0.828975638	2.566666665	0.010268127	0.114512216
LOC107387870	403.8336069	-0.469066731	0.182847903	-2.565338311	0.010307525	0.114879341
rnf217	37.26042008	-1.302558152	0.507812415	-2.565038022	0.01031645	0.11490659
LOC107379332	1993.864158	0.908841675	0.354523082	2.563561359	0.010360439	0.115324104
suox	1223.783197	0.963657232	0.376000243	2.562916513	0.0103797	0.115466028
LOC107395406	14.83651174	-1.627792444	0.635435987	-2.561693826	0.01041631	0.115800633
rbks	731.8049274	0.764541811	0.298556183	2.560797111	0.010443232	0.116027192
LOC107377113	13.91475588	-2.711803911	1.059613741	-2.559238152	0.010490185	0.116475867
cxcr4	54.63326322	-2.120045204	0.82891012	-2.557629774	0.010538823	0.11694268
LOC107393728	23.85717713	1.464383015	0.57280956	2.556491923	0.010573353	0.117105989
LOC107384867	1998.166845	0.757859248	0.296430827	2.556614156	0.010569638	0.117105989
phyhd1	7577.512787	0.797748924	0.312043279	2.556532946	0.010572106	0.117105989
LOC107384261	16.84115003	-2.550183505	0.997954752	-2.555409952	0.01060628	0.117397351
LOC107385261	20.27980019	1.941556698	0.75987094	2.555113763	0.01061531	0.117424
rps15	7333.843487	-0.54085463	0.211803044	-2.553573445	0.010662379	0.117871136
LOC107380827	972.4101443	0.499408316	0.195624236	2.552895936	0.010683141	0.118027075
slc30a1	164.2633144	-1.288888412	0.50503876	-2.552058407	0.010708857	0.118237512
ube2r2	485.0795865	-1.166209092	0.457138107	-2.551108897	0.010738077	0.118486359
LOC107396396	151.5399638	-1.215816293	0.476652523	-2.550739239	0.010749472	0.118538331
lama2	33.90196543	-1.47421661	0.578065154	-2.550260292	0.010764252	0.118627542
LOC107379225	435.8930023	-1.839959931	0.721776976	-2.549208403	0.010796776	0.118912069
rpl17	3574.168663	-0.56204247	0.22054394	-2.548437598	0.010820664	0.119101192
LOC107396671	20.6704483	1.941447636	0.762126119	2.547409921	0.010852587	0.119378454
LOC107385614	51.78479364	-2.406223801	0.945072543	-2.546073123	0.010894236	0.119747308
impact	150.9294792	-0.628943623	0.247041714	-2.545900496	0.010899625	0.119747308
LOC107387124	304.9803051	-0.803933465	0.316049505	-2.543694744	0.010968689	0.12013391
yaf2	80.90213192	-0.778289386	0.305921403	-2.544082823	0.01095651	0.12013391
slamf6	115.6539481	-1.849473032	0.727047085	-2.543814658	0.010964925	0.12013391
LOC107389246	166.3076516	-1.149056215	0.451610174	-2.544354139	0.010948003	0.12013391
LOC107386322	13.47695254	-2.539048266	0.99812894	-2.543807883	0.010965138	0.12013391
LOC107394006	23.58313661	2.528844076	0.994427134	2.543015963	0.010990021	0.12029324
LOC107385758	60.10178347	-2.11792276	0.833070324	-2.542309692	0.011012255	0.120387984
LOC107389005	179.8109758	-1.834637279	0.721637985	-2.542323598	0.011011817	0.120387984
LOC107381707	405.6008564	0.729224459	0.286976746	2.541057658	0.011051769	0.120615172
LOC107391105	47.11489847	1.05985982	0.417102659	2.541004705	0.011053443	0.120615172
LOC107394210	17001.89996	-1.941749883	0.764123741	-2.541145862	0.011048981	0.120615172
LOC107385564	5.417016604	2.122574987	0.835439125	2.540669839	0.011064034	0.120656492
LOC107396321	182.5797521	-1.299977111	0.511830911	-2.539856586	0.011089793	0.120863069
LOC107377868	36.55479219	-2.051347946	0.807877539	-2.539181802	0.011111207	0.121022063
LOC107386956	16.75442687	1.893385459	0.745740138	2.538934626	0.01111906	0.121033252
tyr	4.121245177	-2.805758666	1.106409405	-2.535913608	0.01121544	0.122007472
LOC107386805	68.56683648	-2.095226341	0.826480244	-2.535119692	0.011240891	0.122134486
rassf10	454.433342	0.697095498	0.274958269	2.53527745	0.01123583	0.122134486
LOC107372637	104.8369079	1.255169072	0.495156874	2.534891743	0.011248208	0.122139147
pgam5	456.8756321	0.496504174	0.195962565	2.533668473	0.011287547	0.122491295
LOC107395766	38.97731519	-1.258978701	0.49700504	-2.53313065	0.011304881	0.122596254
LOC107388499	128.5878732	-2.813688304	1.110839112	-2.532939534	0.011311046	0.122596254
LOC107386181	3429.144546	0.542908478	0.214467935	2.531420266	0.011360164	0.12305341
dyrk3	11.76302231	-2.007283944	0.793075167	-2.531013488	0.011373348	0.123121
LOC107376261	10.9419154	-2.091521425	0.82642962	-2.530791945	0.011380533	0.123123621
LOC107378749	440.8072491	-0.774221881	0.305984136	-2.530268039	0.011397542	0.123232448
LOC107390413	4.240810896	-2.351871553	0.929701673	-2.529705626	0.011415826	0.123354922
map1a	576.5191681	1.02198442	0.404061599	2.529278756	0.011429721	0.123355935
rrbp1	10414.85401	-0.900680997	0.356102395	-2.529275312	0.011429833	0.123355935
epha3	458.8221494	0.906093574	0.358747661	2.52571284	0.011546382	0.124537981
lcp2	88.98357731	-1.509435609	0.597816708	-2.524913719	0.01157267	0.124669855
mex3a	9.468153929	1.656094284	0.655871374	2.525029069	0.011568872	0.124669855
LOC107393202	145.499477	1.117192779	0.442863639	2.522656368	0.011647215	0.125396736
LOC107380403	111.1776411	1.001976828	0.39734341	2.521689808	0.011679265	0.125665486
npr1	592.0460444	0.743216456	0.294891364	2.520305937	0.011725287	0.12608417
LOC107396806	42.42212312	0.83578793	0.331693287	2.519761364	0.011743442	0.126126417
igdcc4	307.4321714	0.850452793	0.337485024	2.519971943	0.011736419	0.126126417
themis2	59.56166602	-2.010969397	0.798196379	-2.519391782	0.011755777	0.126182469
LOC107391413	455.80421	-1.801842876	0.715433481	-2.518533062	0.011784482	0.126414056
LOC107392368	22.64400355	-1.819727803	0.722627636	-2.518209534	0.011795313	0.12644945
rpl7a	7780.239477	-0.50449264	0.200354196	-2.518003869	0.011802202	0.12644945
rps6ka1	327.1815463	0.859533184	0.341383193	2.517795843	0.011809175	0.12644945
klhdc1	625.3868552	0.746744701	0.296694778	2.516878472	0.011839966	0.126663547
LOC107395825	288.2243681	1.523361268	0.605283147	2.516774628	0.011843456	0.126663547
LOC107396140	334.4613212	-0.463536986	0.184197228	-2.516525302	0.011851839	0.126676799
vav3	137.2156424	1.049826924	0.417450793	2.514851908	0.011908239	0.127049879
LOC107379134	865.1850867	0.50238139	0.199735551	2.515232703	0.011895384	0.127049879
pdzk1	9.023361243	-2.591466511	1.030449954	-2.514888279	0.011907011	0.127049879
LOC107380751	7.837861687	1.884898228	0.749879329	2.513602062	0.011950519	0.127424299
LOC107383264	44.68249285	-1.452307619	0.577890343	-2.513119726	0.011966871	0.127521974
LOC107382877	1048.450473	0.794952823	0.316481407	2.511846845	0.01201012	0.127905974
LOC107389928	6.904745697	-2.278273705	0.90716355	-2.511425536	0.012024465	0.127981882
LOC107377103	3.658250033	-2.795256106	1.113168337	-2.51108122	0.0120362	0.128029934
ccser1	176.4926032	-1.336232038	0.532377562	-2.509933048	0.012075405	0.128369957
LOC107373609	41.17346728	1.107574127	0.44139351	2.509266905	0.012098203	0.128535255
LOC107386903	3541.801941	0.484055516	0.192951605	2.50868873	0.012118021	0.128668716
ttll10	3.681199839	2.551792639	1.017419284	2.508103276	0.012138118	0.128804977
zbtb16	63.08622246	1.257873254	0.50170645	2.507189718	0.012169537	0.129061147
ero1b	561.1716956	-1.092677458	0.43586699	-2.506905739	0.012179319	0.129087674
LOC107373335	7635.251741	0.643900274	0.256892593	2.506496062	0.012193442	0.129160159
abcc4	124.157473	-1.54707852	0.617532921	-2.50525675	0.012236253	0.129468077
emc2	596.0767105	0.730962876	0.291774538	2.50523189	0.012237113	0.129468077
LOC107373396	5.807365603	2.177155095	0.869166059	2.504878179	0.012249358	0.129520338
LOC107386672	838.8074665	0.586902336	0.2344653	2.503152216	0.012309259	0.130076152
skap1	10.2773359	2.284707403	0.913324466	2.501528743	0.01236584	0.130596237
fbf1	1615.60979	-1.077309044	0.430722402	-2.501167893	0.012378448	0.130651572
myd88	782.8479809	0.549142563	0.219638432	2.500211628	0.012411914	0.130849021
LOC107375122	17.499211	2.001837339	0.800614225	2.500376933	0.012406123	0.130849021
LOC107392604	872.1675051	0.762236444	0.3049502	2.499544004	0.012435325	0.131017939
kdelc1	848.131851	0.658406001	0.263519932	2.498505503	0.012471821	0.13132442
mcfd2	11334.41619	-0.565618547	0.226563945	-2.49650732	0.012542308	0.131988253
LOC107387144	13.35096186	-1.263032256	0.506046535	-2.495881642	0.012564452	0.132064527
LOC107382894	63.07573646	-1.618886748	0.648568732	-2.496091267	0.012557029	0.132064527
cep85	243.6213036	-1.407465743	0.564007425	-2.495473784	0.012578905	0.132138118
LOC107395987	13.9775371	1.666365419	0.667875939	2.495022385	0.012594918	0.132228001
LOC107375711	47457.18801	0.807147852	0.323640755	2.493962335	0.012632595	0.132545072
arhgap21	34.71792696	-1.323510803	0.530819766	-2.493333684	0.012654986	0.132623052
LOC107378449	69.58147388	-1.178349431	0.472591734	-2.493377152	0.012653436	0.132623052
LOC107379296	39.5017523	-2.251445825	0.903471592	-2.491994042	0.012702817	0.133045687
LOC107394379	107.967584	-1.752926965	0.703591629	-2.491398265	0.01272414	0.13319035
LOC107383810	760.7157078	0.643098614	0.258163434	2.491052291	0.012736537	0.133241463
LOC107385125	100073.0224	0.749068097	0.30079333	2.490308206	0.012763236	0.133402002
cuedc1	200.5508487	0.615746622	0.247267405	2.490205378	0.01276693	0.133402002
LOC107373093	336.8090053	0.930940362	0.373887214	2.489896219	0.01277804	0.133439463
LOC107386646	84.36923056	0.766619367	0.307918325	2.489684127	0.012785667	0.133440524
ndufs4	994.8887546	0.725463158	0.291428572	2.489334364	0.012798254	0.133493316
idh1	5436.660005	0.479222029	0.19252848	2.489096826	0.012806808	0.133504011
LOC107388148	941.4971649	1.151417102	0.462802615	2.487922638	0.012849168	0.13386689
LOC107380221	6.835508656	-1.937303106	0.778906281	-2.487209506	0.012874955	0.133978999
LOC107373451	2635.523488	0.692824191	0.278578457	2.486998449	0.012882596	0.133978999
akap13	215.05351	-0.781298065	0.314133367	-2.487154012	0.012876964	0.133978999
LOC107392203	57.19532345	-2.978704874	1.198261487	-2.485855472	0.012924044	0.134331272
LOC107390153	28.33234468	1.375748596	0.553626344	2.484976757	0.012955989	0.134584419
alg8	434.0705559	0.497482564	0.200216708	2.48472052	0.012965318	0.134602468
LOC107395376	11.7856945	-1.995885042	0.803648305	-2.483530456	0.013008721	0.134816271
LOC107382082	766.532369	0.669833964	0.269670447	2.483898301	0.012995292	0.134816271
nucks1	1137.35818	0.459109994	0.184856886	2.483596926	0.013006293	0.134816271
LOC107375917	4.570860572	2.603994407	1.048848642	2.48271705	0.013038461	0.135045553
LOC107389914	12.76910776	-1.432173365	0.576921495	-2.482440638	0.013048581	0.135071473
LOC107387310	106.1142063	-1.130191233	0.455511441	-2.481147854	0.013096004	0.13548328
mrc1	16.80722264	-2.328436548	0.938783921	-2.480268883	0.013128334	0.135738554
LOC107373122	369.3017374	-0.538612002	0.217202917	-2.479764134	0.013146932	0.135851627
LOC107384339	80.24101401	-1.79533556	0.724313793	-2.478670952	0.01318729	0.136189299
purg	37.9792661	1.694592918	0.684024588	2.47738597	0.013234869	0.136601106
LOC107380819	7.356227869	-2.321268313	0.937701412	-2.475487701	0.013305434	0.137058521
LOC107376056	2486.96184	0.662414617	0.267587889	2.47550298	0.013304865	0.137058521
LOC107388127	5.057127815	-3.155562978	1.274788289	-2.475362385	0.013310105	0.137058521
polr3b	467.1664071	-0.923536316	0.373039866	-2.475704076	0.013297374	0.137058521
LOC107382419	172.2417311	-0.552950644	0.223468651	-2.474399166	0.013346049	0.137302847
LOC107383411	5.483845564	-2.56264409	1.035699793	-2.474311675	0.013349318	0.137302847
bzrap1	113.872669	0.826541672	0.334180284	2.473340624	0.013385649	0.137596716
LOC107377054	6.648302088	-2.504444626	1.012861411	-2.472642949	0.013411806	0.137648583
aqp8	3.736508266	-2.914532376	1.178727142	-2.472609879	0.013413047	0.137648583
LOC107397174	1333.145648	0.518246323	0.209596975	2.472584939	0.013413983	0.137648583
LOC107381523	7.428865446	-2.27957407	0.92239675	-2.471359607	0.013460039	0.138041303
LOC107382254	14.44769609	1.591402643	0.644057922	2.470899883	0.013477354	0.138138988
LOC107376590	359.305306	-0.653134411	0.264406172	-2.470193519	0.013503998	0.138262894
st6galnac3	9.587638407	2.115650024	0.856750199	2.46938959	0.013534378	0.138262894
gmpr	6.630246794	-2.669138837	1.081001738	-2.469134639	0.013544025	0.138262894
LOC107395007	14.89459659	-2.765465862	1.119721195	-2.46978076	0.013519588	0.138262894
slc25a15	54.54962396	-1.986518436	0.804261409	-2.469990994	0.013511645	0.138262894
LOC107385070	6.463400189	-2.48276233	1.00546247	-2.469273994	0.013538751	0.138262894
acss1	1554.143915	-1.945899443	0.788024915	-2.46933746	0.01353635	0.138262894
necab2	8.026957675	2.014436959	0.816117991	2.468315833	0.013575049	0.138499863
LOC107396463	2194.598273	-0.693198532	0.280937025	-2.467451671	0.013607859	0.138754776
aspdh	1818.500152	0.401770034	0.162879981	2.466663062	0.013637862	0.138980785
xk	7.740145432	-2.152076606	0.872561833	-2.466388654	0.013648315	0.139007427
csgr03h10orf54	240.0020089	-1.335005365	0.541433087	-2.465688552	0.013675018	0.139199438
znf646	7.984821538	-1.923730176	0.780393323	-2.465077699	0.013698354	0.139277075
sdccag8	88.38593917	-0.644651806	0.261513619	-2.465079284	0.013698294	0.139277075
LOC107381332	3.362913731	-2.772591753	1.125354631	-2.463749361	0.013749222	0.139714156
rqcd1	416.2398632	0.62536872	0.253881383	2.463231891	0.013769083	0.139821308
LOC107372548	322.2209534	0.958178258	0.389018843	2.463063877	0.013775537	0.139821308
slc12a6	393.0012709	0.71559141	0.290581743	2.462616553	0.013792734	0.139915761
hey1	16.29626323	1.299171138	0.52771214	2.461893594	0.013820566	0.140037875
LOC107374069	2455.386	0.710120229	0.288433058	2.46199321	0.013816728	0.140037875
LOC107394776	66.68519247	-0.82144078	0.333691164	-2.461679748	0.013828808	0.140041366
rpl27	1800.722012	-0.507057743	0.206083226	-2.460451309	0.01387624	0.140441488
LOC107381719	2867.528222	0.543107069	0.22078992	2.45983634	0.013900039	0.140602101
pex3	780.6107954	-0.596879686	0.242724927	-2.459078648	0.01392941	0.140818869
atoh8	1131.381483	0.866484767	0.352398335	2.458821964	0.013939372	0.140839289
LOC107374857	30.23063535	-1.865442983	0.758825167	-2.458330407	0.013958469	0.140951917
fbxo43	4.909703075	-2.020683014	0.822061898	-2.458066744	0.013968721	0.140962945
ube2d2	988.6165476	0.555316468	0.225933433	2.457876469	0.013976124	0.140962945
tmem97	1970.708915	0.571954946	0.232720608	2.45768929	0.01398341	0.140962945
LOC107372455	4.049346211	2.554120059	1.03939194	2.457321403	0.013997739	0.141027222
LOC107397049	74.73500326	-1.701984851	0.692710146	-2.456994258	0.014010493	0.141075556
samd8	42.28869329	-1.022548618	0.416533415	-2.454901768	0.014092309	0.141818857
LOC107380292	1654.606082	0.512197953	0.208689407	2.454355308	0.014113745	0.141873542
mab21l2	11.81562586	1.636520123	0.666742111	2.454502417	0.014107972	0.141873542
LOC107395010	836.4786856	1.122759204	0.457640348	2.453365854	0.014152632	0.142183831
hsd17b4	4804.271306	0.514870293	0.209904773	2.452875579	0.014171935	0.142248342
LOC107377007	30036.93888	0.703189738	0.286689122	2.452795319	0.014175097	0.142248342
LOC107381329	3.885828887	-2.809517142	1.145939959	-2.451714089	0.014217758	0.142595751
LOC107386410	37.06833498	-2.123623488	0.866620473	-2.450465406	0.014267167	0.142859514
xylb	1268.93638	0.675447618	0.275620067	2.450647468	0.014259954	0.142859514
zc3h12d	34.71142483	-1.389810596	0.567215125	-2.45023543	0.014276284	0.142859514
znf507	77.40148537	-0.80771379	0.329639092	-2.450297342	0.014273829	0.142859514
LOC107380363	19.98239986	1.201674161	0.49053991	2.449697032	0.014297646	0.142992589
LOC107380192	1885.58656	0.504048363	0.205863222	2.448462425	0.014346739	0.143321905
LOC107395373	2228.879576	0.55803786	0.227906031	2.448543624	0.014343506	0.143321905
shf	189.2024385	-0.879129429	0.35910443	-2.44811636	0.014360527	0.143378865
lgi1	11.92244055	1.742789398	0.711980206	2.447805969	0.014372903	0.143421678
LOC107390165	13.49969023	-1.603987181	0.655603319	-2.446581849	0.014421805	0.14374786
LOC107385420	94.50664666	0.850408264	0.347586285	2.446610529	0.014420657	0.14374786
LOC107380240	1536.852093	0.630409426	0.257761511	2.445708139	0.014456798	0.143934832
dars	1083.567171	-0.57742639	0.23608231	-2.445868944	0.014450352	0.143934832
znf518b	45.03584256	-1.170518479	0.479495927	-2.441143738	0.014640826	0.145685258
LOC107382998	4.65235456	1.910941269	0.783654816	2.438498725	0.014748411	0.146673482
rpl23	4458.634894	-0.550194347	0.225647461	-2.438291768	0.014756858	0.146675227
cerkl	3.731162471	-2.554869833	1.047937285	-2.437998791	0.014768823	0.14671192
LOC107374077	12618.86497	0.61847828	0.253783204	2.437033929	0.01480829	0.146780767
fbxl5	1317.016233	0.612880642	0.251437928	2.437502754	0.014789102	0.146780767
slc13a4	39.42940314	-1.767688138	0.725348261	-2.437019888	0.014808865	0.146780767
cadps2	222.8943035	-0.754410152	0.309511733	-2.437420208	0.014792478	0.146780767
LOC107383776	1190.251977	0.505014922	0.20724392	2.436814169	0.014817292	0.146782245
LOC107389763	23.32891217	-1.334855531	0.547914031	-2.436249948	0.014840426	0.146788675
LOC107377345	13.67138774	-1.483237825	0.608834363	-2.436192691	0.014842775	0.146788675
edem3	1501.466263	-0.627880699	0.257722369	-2.436267762	0.014839695	0.146788675
LOC107386861	173.3157403	-1.022516083	0.419775451	-2.435864412	0.014856252	0.146840056
LOC107386729	127.928116	0.847492042	0.348067006	2.434853138	0.014897835	0.14716903
gusb	1515.915528	-0.732466916	0.300879381	-2.434420446	0.014915658	0.147263058
LOC107385371	624.7528285	0.613955801	0.252271636	2.4337092	0.014944996	0.147376062
LOC107397274	1471.602016	-1.040965901	0.427739063	-2.433647033	0.014947563	0.147376062
LOC107390533	1485.616218	0.502488573	0.206484728	2.433538677	0.014952038	0.147376062
LOC107390157	15.92881917	-2.343422168	0.963250885	-2.432826384	0.014981482	0.147584248
LOC107390777	11.9804441	-1.653415928	0.680085692	-2.431187639	0.015049418	0.148171176
LOC107390210	39.18140224	1.158528679	0.476634573	2.430643401	0.01507204	0.148311554
LOC107379131	24.60432495	-0.917576206	0.377581752	-2.430139173	0.015093026	0.148435683
pxk	267.0893889	0.704372452	0.28996278	2.429182301	0.015132921	0.148663134
LOC107395212	76.59610661	1.669652772	0.687324686	2.429205303	0.015131961	0.148663134
LOC107378613	15.37236964	-1.742127297	0.717826332	-2.426948162	0.015226431	0.149498937
LOC107379907	5.184600846	-2.958584747	1.219506477	-2.426050868	0.015264131	0.149537881
nagpa	578.3441345	-0.568696559	0.234356113	-2.426634195	0.015239613	0.149537881
LOC107382435	33.88981643	1.286229437	0.530087876	2.42644568	0.015247533	0.149537881
LOC107385269	291.8297592	-0.919289922	0.378893621	-2.426248082	0.015255838	0.149537881
LOC107386109	9548.7689	0.856327397	0.353123525	2.425008071	0.015308046	0.149885301
tmem100	6.402230454	2.604342831	1.075279136	2.42201559	0.015434688	0.150958574
LOC107377727	40.26926178	-1.914161492	0.790309271	-2.422041045	0.015433607	0.150958574
ost4	1825.88018	-0.641911209	0.26514851	-2.420949714	0.015480018	0.151153544
smad7	213.8102287	0.914902308	0.377928006	2.420837549	0.015484796	0.151153544
mctp1	5.726230216	2.360261565	0.974794135	2.421292333	0.015465435	0.151153544
LOC107395000	424.8994054	0.421415531	0.174099413	2.420545384	0.015497245	0.151153544
dlst	4911.520422	0.463574841	0.191508631	2.420647251	0.015492903	0.151153544
LOC107375663	285.7405629	-2.373516996	0.98084948	-2.419858546	0.015526546	0.151309469
nphs1	55.74382869	-1.076804177	0.445002571	-2.419770684	0.015530297	0.151309469
LOC107373756	54.43978517	0.860681631	0.355741507	2.419401769	0.015546059	0.151379856
LOC107373423	30.84546656	-1.623357371	0.671288566	-2.418270553	0.015594477	0.151767984
LOC107397330	7330.797487	0.666635538	0.27575481	2.417493782	0.015627801	0.15192553
LOC107377190	879.8417849	-0.437019707	0.18076898	-2.417559176	0.015624993	0.15192553
LOC107375812	36.76094136	-1.035580403	0.428443424	-2.417076199	0.015645741	0.152016596
chchd2	3593.882499	0.89946307	0.372204999	2.416579771	0.015667093	0.152140685
LOC107386045	227.3333915	0.701928664	0.290586424	2.415559044	0.015711075	0.152400866
LOC107372534	783.6411181	0.641944659	0.265732189	2.41575799	0.015702494	0.152400866
LOC107374334	592.7693135	-0.730030532	0.302349012	-2.414529245	0.015755558	0.152748801
LOC107391150	152.1895913	0.847838259	0.351244259	2.413813852	0.015786525	0.152965391
LOC107390286	145.5794455	-1.613974493	0.668828864	-2.413135226	0.01581595	0.153166812
LOC107376396	181.4957018	-2.456335597	1.018201104	-2.412426766	0.015846721	0.153381031
zfand3	4.818505636	-1.929842374	0.800080571	-2.412060038	0.015862669	0.153451637
as3mt	661.6796066	0.382386446	0.158603806	2.41095378	0.015910865	0.153656075
csgr16h14orf1	4752.334039	-1.223750052	0.507615896	-2.410779609	0.015918464	0.153656075
LOC107382724	3.954145498	2.18097677	0.904600917	2.410982266	0.015909622	0.153656075
samm50	1750.780325	0.459884416	0.190759872	2.410802709	0.015917456	0.153656075
LOC107383503	7.752167117	-2.388764205	0.990991114	-2.410479943	0.015931547	0.153698692
LOC107379342	28.89227694	-2.156364559	0.895168088	-2.408893467	0.016000968	0.154284482
LOC107393238	5.243244031	-2.157218938	0.896320785	-2.406748761	0.016095238	0.155109111
LOC107396433	114.4227738	-2.733738376	1.136322036	-2.405777842	0.016138075	0.155437452
LOC107393883	3.859029533	-2.496732459	1.037968176	-2.405403668	0.01615461	0.155512243
ndufb11	805.3188613	0.55568536	0.231132444	2.404185893	0.016208529	0.155777578
LOC107384382	34.86369353	-1.647643471	0.685298447	-2.40427142	0.016204737	0.155777578
igsf5	1251.59942	0.602106235	0.250438864	2.404204463	0.016207705	0.155777578
mrpl44	884.2264296	0.469720145	0.195550187	2.402043949	0.01630375	0.156607848
tardbp	1744.299041	0.369644441	0.153906023	2.401754222	0.016316667	0.156647072
LOC107387146	20.22408446	3.033964914	1.263453171	2.401327555	0.016335707	0.156744994
kcns2	53.23205463	0.923789715	0.384930822	2.399885022	0.016400222	0.15727893
LOC107394775	10273.4419	0.710191828	0.296008708	2.399226136	0.016429765	0.157477074
bcl6b	64.16378933	-1.287311773	0.536731309	-2.398428695	0.016465582	0.157735116
amd1	1134.576964	0.996014824	0.415326718	2.398147724	0.016478218	0.157770931
LOC107393773	81.06723676	0.672747884	0.280578735	2.397715151	0.016497689	0.157872112
LOC107385417	981.8965357	0.67247939	0.280500656	2.39742537	0.016510744	0.157911819
LOC107386892	3893.977088	0.854220176	0.356342017	2.39719184	0.016521271	0.157927322
mettl12	119.9478388	0.768558187	0.320714118	2.396396488	0.016557169	0.158185198
plau	43.42226939	-1.808934621	0.754954711	-2.396083624	0.016571309	0.158235032
LOC107381547	18.04979008	1.141770654	0.476622718	2.395543917	0.016595726	0.158382892
LOC107375512	65.28285883	-1.222752629	0.510509348	-2.395162074	0.01661302	0.158462652
jkamp	1089.28729	0.436716159	0.18242542	2.393943558	0.016668314	0.158725751
tmem136	25.94750605	-1.178731829	0.492417426	-2.393765468	0.016676408	0.158725751
f2r	160.0380826	-0.892610984	0.372818827	-2.394221858	0.016655671	0.158725751
dcp2	98.71909328	-0.746503496	0.311824517	-2.393985896	0.01666639	0.158725751
zcchc24	49.40707061	-1.15164483	0.481151799	-2.393516623	0.016687725	0.158732753
pam	2122.324064	-0.802809701	0.335432676	-2.393355685	0.016695048	0.158732753
csgr17h1orf210	2466.410346	0.88523121	0.370081606	2.391989217	0.016757335	0.15915429
cdo1	24291.53113	0.638680014	0.267002026	2.392041828	0.016754933	0.15915429
LOC107380478	13484.51954	0.538423236	0.225268021	2.390145006	0.016841722	0.159613796
haao	5451.970566	0.771782662	0.322899803	2.390161452	0.016840968	0.159613796
olah	950.7571082	0.595780569	0.249244219	2.390348595	0.016832388	0.159613796
wscd2	22.41572477	-1.179682821	0.493479856	-2.39053896	0.016823664	0.159613796
mdn1	269.1261175	-0.970915274	0.406406363	-2.389025769	0.016893117	0.160015362
LOC107385082	7.557900337	-1.896207022	0.794253298	-2.387408432	0.016967629	0.16058228
cldnd1	104.8345325	-0.658703674	0.275916049	-2.387333674	0.01697108	0.16058228
LOC107392453	3.617688263	-2.650553204	1.110372713	-2.387084241	0.016982599	0.160605574
galm	1546.849977	0.486175024	0.203782235	2.38575764	0.017043979	0.161067015
LOC107372868	101.7754536	0.615536719	0.258017735	2.385637245	0.017049559	0.161067015
LOC107374279	21.42803614	-1.600992911	0.671460066	-2.384345685	0.017109522	0.161547415
fgf1	2591.092536	0.911367827	0.38229782	2.383921067	0.017129276	0.161647856
sfrp2	12.94249941	-2.472689626	1.037721826	-2.382805839	0.017181254	0.162052121
LOC107374447	57.78443733	1.094643134	0.459463076	2.382439834	0.017198342	0.162127061
LOC107388801	8.144452861	2.739637501	1.150358679	2.381550685	0.017239918	0.162360281
fgb	1053564.071	0.951539696	0.399551563	2.381519143	0.017241395	0.162360281
pcdh17	42.04582237	1.419167168	0.596079022	2.380837295	0.017273339	0.162574764
arl4d	283.8139463	0.762642722	0.32064751	2.378445796	0.017385793	0.163027434
LOC107381737	1498.750029	1.0524469	0.442407079	2.378910625	0.017363885	0.163027434
ebp	2971.042523	-1.187979813	0.499472945	-2.378466794	0.017384803	0.163027434
LOC107395127	10.6387199	1.481988559	0.622943625	2.37900911	0.017359247	0.163027434
LOC107375557	25.92164285	1.035031498	0.435060684	2.379050871	0.01735728	0.163027434
LOC107378668	68.89640362	-0.833104504	0.350207355	-2.378889226	0.017364893	0.163027434
LOC107383466	33.57473854	-0.955933644	0.401876858	-2.378673028	0.01737508	0.163027434
LOC107378893	70.4794966	-0.760245332	0.319683699	-2.378117292	0.01740129	0.163086507
LOC107391357	2653.519402	-0.833976178	0.350747744	-2.377709311	0.017420553	0.163094638
plxnb2	50.66070743	-1.332143482	0.560251627	-2.377759237	0.017418195	0.163094638
klhdc8b	6.138915259	-2.017823349	0.848831261	-2.377178411	0.017445648	0.163202468
kars	3556.592745	-0.741529267	0.311950133	-2.377076298	0.017450478	0.163202468
camkk1	27.15579782	1.520106997	0.639546475	2.376851498	0.017461116	0.163215874
LOC107373595	10.46265863	-1.683897874	0.708536646	-2.376585436	0.017473714	0.163247578
LOC107379396	1308141.16	0.872292066	0.367129678	2.37597808	0.017502503	0.163258482
rpl14	795.8471857	-0.591987004	0.249154995	-2.375978871	0.017502465	0.163258482
LOC107382556	4.490719687	1.836924531	0.773066795	2.376152414	0.017494235	0.163258482
LOC107397032	78.17804912	0.772693249	0.325286343	2.375424807	0.017528763	0.163331599
LOC107388440	21.88516615	-2.064349145	0.869043519	-2.375426661	0.017528675	0.163331599
sdhaf3	1241.844846	0.699265832	0.294561877	2.373918303	0.017600444	0.163913381
LOC107384825	2570.523543	0.460983604	0.194244873	2.373208604	0.017634301	0.164142484
LOC107388489	5.331251828	-1.979037939	0.834153123	-2.372511575	0.01766761	0.164366239
dlat	1336.65017	0.545365393	0.229990454	2.371252297	0.017727925	0.164840886
LOC107382786	15.73658792	-2.487544797	1.04957294	-2.370054239	0.017785476	0.165116261
LOC107376082	6.078637502	-2.348849799	0.991001886	-2.370176921	0.017779575	0.165116261
LOC107396791	186754.2089	1.869556994	0.788739357	2.370310264	0.017773164	0.165116261
LOC107393613	1207.404764	0.973592622	0.410942887	2.369167715	0.017828167	0.165425985
LOC107378759	4.100010395	2.709959493	1.144112182	2.368613441	0.017854904	0.165587425
LOC107381589	4.680459352	-1.982859423	0.838042769	-2.366059939	0.017978533	0.166640941
LOC107391395	70.90402081	-1.870338417	0.790570903	-2.365807305	0.017990806	0.166640941
LOC107391197	25.87442452	-1.842534399	0.778858358	-2.365686111	0.017996695	0.166640941
LOC107376634	334.6713566	-1.553633358	0.657016917	-2.364677863	0.01804576	0.167008045
ufsp1	36.68451663	0.934362184	0.395167553	2.364470912	0.018055845	0.167014214
cul4b	420.1752206	-0.641865727	0.271576024	-2.363484518	0.018103983	0.167291169
tank	514.6142913	-1.697318356	0.718205207	-2.363277709	0.01811409	0.167291169
LOC107381473	118.9669813	3.824357719	1.618211815	2.36332332	0.01811186	0.167291169
ptcd3	2109.699785	0.428773451	0.181502191	2.362359643	0.018159016	0.167581806
LOC107396686	159.2895959	-1.085926011	0.459780623	-2.361835096	0.018184729	0.167581806
LOC107386214	709.8669313	0.766833226	0.324646084	2.362059069	0.018173746	0.167581806
LOC107380777	175.8562	-1.171334537	0.495961846	-2.361743239	0.018189235	0.167581806
usp36	341.9908979	-0.738638781	0.312761176	-2.361670299	0.018192814	0.167581806
LOC107396805	186.1745947	-0.722742997	0.306061391	-2.361431457	0.018204537	0.167602724
tnfaip3	740.3978916	-2.242088581	0.949609961	-2.361062618	0.018222653	0.167682455
lima1	250.0800609	-1.010806715	0.428176363	-2.360725166	0.018239242	0.16774805
LOC107384756	1828.725476	0.592116923	0.250894899	2.360019774	0.018273961	0.1678932
ap2m1	10682.8205	0.415776658	0.176161797	2.360197642	0.018265201	0.1678932
LOC107379637	2956.672518	0.61390374	0.260171678	2.359610183	0.018294147	0.167944181
LOC107373268	3.261803638	2.461869096	1.04337581	2.35952288	0.018298452	0.167944181
sgcg	13.58442008	1.711337464	0.725498364	2.358844002	0.01833196	0.168164676
LOC107388719	138.6607781	-1.429041121	0.606048449	-2.357965151	0.018375418	0.168314471
LOC107378675	75.00865399	-1.316358433	0.558266791	-2.357937917	0.018376766	0.168314471
hhipl1	9452.395901	0.597022557	0.253158772	2.358292989	0.018359196	0.168314471
LOC107393823	4.955069654	-2.427999206	1.029911682	-2.357482927	0.018399301	0.168382486
sbspon	38.38738274	2.303219025	0.977083358	2.357239029	0.018411391	0.168382486
cald1	281.5965147	0.775395544	0.328945891	2.357213044	0.01841268	0.168382486
astn2	4.571492481	2.266659505	0.962017003	2.356153267	0.018465297	0.168776624
LOC107391540	30.23365078	-1.397848962	0.593337848	-2.355907292	0.018477528	0.168801409
man1a2	1140.139331	-1.764419604	0.749110208	-2.355353839	0.018505075	0.168966012
LOC107385831	148.8990258	-2.589532845	1.10062865	-2.352776158	0.018633847	0.169813252
morn4	3.980208867	-2.789418185	1.18558647	-2.352774982	0.018633906	0.169813252
chchd3	1650.044387	0.46393766	0.197191222	2.352729785	0.018636171	0.169813252
LOC107396531	34.29219711	1.599108194	0.679667411	2.352780445	0.018633633	0.169813252
LOC107372547	91.82576576	1.077109511	0.457905696	2.352251828	0.018660137	0.169944298
LOC107394134	12702.18209	0.415577646	0.176688635	2.35203383	0.018671077	0.169956639
LOC107386731	338.5802256	-0.612845105	0.260614799	-2.351536091	0.018696076	0.170031831
LOC107392716	37.35552663	-1.586105451	0.674511523	-2.351487553	0.018698515	0.170031831
LOC107375136	23.47796178	1.110871741	0.472494842	2.351076967	0.018719161	0.170132327
LOC107382181	10.79813343	-1.861854767	0.792031618	-2.35073288	0.018736479	0.170202483
LOC107394673	13.39748272	-2.10959985	0.897539108	-2.350426664	0.018751902	0.170255368
LOC107390878	200.9248801	0.6647225	0.282867816	2.34994037	0.018776419	0.170390716
upp2	24016.42236	-1.240391372	0.528001992	-2.34921722	0.018812928	0.170634701
ulk4	152.1020728	0.890518624	0.379392115	2.347224909	0.018913834	0.171462221
LOC107375568	365.2366333	-0.957302351	0.408072385	-2.345913092	0.018980533	0.171978949
slc7a11	299.6917319	-1.811868005	0.772476724	-2.345530874	0.019000005	0.17206746
otub2	351.9716443	0.607431894	0.259048905	2.344854128	0.019034525	0.172292087
LOC107372506	463.5686668	-1.820285594	0.776472334	-2.344301934	0.019062732	0.172459373
LOC107386855	32.91151845	-0.945440816	0.403446166	-2.343412568	0.01910824	0.172639144
LOC107373189	1032.47304	0.471220812	0.201089145	2.343342855	0.019111811	0.172639144
LOC107375826	9.159660984	-1.535406505	0.655182033	-2.343480784	0.019104746	0.172639144
dstn	346.4830692	-1.435615621	0.612811661	-2.342670208	0.019146299	0.172862611
eva1b	1088.588614	-0.753333404	0.321643356	-2.342138866	0.01917358	0.17302082
mafk	60.89606577	-1.357721898	0.579903539	-2.34128921	0.019217274	0.173326911
LOC107388415	10.80961187	1.592136056	0.680099597	2.341033669	0.019230433	0.173357414
rpl13a	5122.094697	-0.52780315	0.225504117	-2.340547737	0.019255477	0.173406862
LOC107396179	6649.534536	-0.509351775	0.217606419	-2.340701979	0.019247524	0.173406862
LOC107384768	321.5586416	-0.959419843	0.410168671	-2.339086113	0.019330977	0.173910141
LOC107389326	10.96432717	-1.320883452	0.564658311	-2.33926151	0.019321903	0.173910141
LOC107397053	15.17743968	-2.078099717	0.888591086	-2.338645693	0.019353778	0.174026973
LOC107392205	1192.605097	-0.7004153	0.299559376	-2.338151817	0.019379374	0.174095555
LOC107386331	2884.382018	0.400092132	0.171123011	2.338038175	0.019385268	0.174095555
LOC107394423	12.163075	-1.212666178	0.518692166	-2.33793039	0.019390859	0.174095555
LOC107388047	88.50547569	-0.816042719	0.349213817	-2.336799631	0.019449605	0.17442977
LOC107388623	4339.636276	0.679753492	0.290973513	2.336135291	0.019484191	0.17442977
mpl	24.04924211	-1.671062424	0.715260871	-2.336297833	0.019475724	0.17442977
lepr	218.262827	-0.556911115	0.238434152	-2.335701954	0.019506781	0.17442977
ankib1	334.6074714	-1.434491884	0.614095012	-2.33594453	0.019494133	0.17442977
LOC107386021	571.1504243	-0.541872545	0.231875893	-2.336907635	0.019443987	0.17442977
kel	121.8251905	0.827814142	0.354321243	2.336337878	0.019473639	0.17442977
dld	1424.710463	0.401014152	0.171685409	2.335749758	0.019504288	0.17442977
lcn2	9108.822306	0.98018039	0.419731517	2.335255637	0.01953007	0.174462068
luc7l	1322.090126	0.340025203	0.145600105	2.335336249	0.019525862	0.174462068
LOC107379320	413.849515	1.125339474	0.482042541	2.334523154	0.019568345	0.174715959
LOC107394937	24.42569087	1.619618762	0.693830745	2.334313914	0.019579291	0.174725708
pdia4	38515.78372	-0.849138737	0.363863196	-2.333675803	0.019612704	0.174935849
LOC107376197	15.98501356	-1.107619866	0.474713683	-2.333237707	0.019635673	0.175052665
ing2	76.80801063	1.093680099	0.468829535	2.332788397	0.019659254	0.17517482
epdr1	1400.525368	1.120231977	0.480258996	2.332558027	0.019671354	0.175194601
LOC107373284	95.43374356	-0.703879555	0.301847971	-2.331900899	0.019705905	0.175414212
wipf2	387.5142432	0.436186539	0.187082183	2.331523675	0.019725763	0.175502876
ciapin1	1715.754248	0.570072872	0.244531812	2.331283066	0.019738439	0.175527579
LOC107391714	7.069344847	-2.153823083	0.923956745	-2.331086487	0.0197488	0.175531687
LOC107393647	6.407943568	2.336694266	1.002891015	2.329958321	0.019808354	0.1758907
stab2	16.99753799	-1.923718891	0.825649729	-2.329945526	0.01980903	0.1758907
ric8b	665.7954519	-0.586644306	0.251845448	-2.32938221	0.019838827	0.175979027
slc19a2	32.13634111	1.277261346	0.548309671	2.329452521	0.019835105	0.175979027
[truncated: 20,620 more rows]
