# Supplementary material for: An automated feeding system for the African killifish reveals the impact of diet on lifespan and allows scalable assessment of associative learning
Source: eLife. 2022 Nov 10;11:e69008. doi: 10.7554/eLife.69008 (PMC9788828; doi:10.7554/eLife.69008)
Supplement: Figure 5—source data 6. [file elife-69008-fig5-data6.xlsx]

## Sheet: AllTerms
ONTOLOGY	ID	Description	setSize	enrichmentScore	NES	pvalue	p.adjust	qvalues	rank	leading_edge	core_enrichment
BP	GO:0006457	protein folding	186	0.696895	2.12443	1e-10	2.46e-07	2.26e-07	1631	tags=31%, list=13%, signal=28%	HSPD1/SDF2L1/DNAJB11/P3H1/MOGS/QSOX2/PDIA6/DERL1/SGTA/ERO1B/SDF2/HSP90B1/HSP90AA1/PSMC1/PDIA4/UGGT1/ERP44/CALR/HSPA4L/HSPA9/NPPA/CLGN/CANX/DNAJC25/DNAJC10/HSPBP1/VCP/HSPA5/CCT3/RAD23B/CCT6A/DNAJC1/ALG12/CCT4/LMAN1/DNAJC3/PDIA5/NUDC/PTGES3/PFDN4/CDC37/HSPA13/TRAP1/BAG5/CCT8/LMAN2L/GNB3/TTC1/PPIL3/RIC3/DNAJC2/PPIL1/UNC45A/CCT7/PDIA3/GNB5/FKBP9/GAK
BP	GO:0022613	ribonucleoprotein complex biogenesis	383	0.598149	1.94616	1e-10	2.46e-07	2.26e-07	3311	tags=45%, list=26%, signal=35%	MDN1/AGO1/HEATR3/HSP90AA1/PELP1/TSC1/EIF6/WDR36/ERI2/DICER1/HELQ/RPL5/STRAP/PRPF8/PDCD11/PTBP2/SNRNP200/EIF4H/WDR3/DHX9/YTHDC1/HEATR1/ABCE1/CLNS1A/EXOSC6/DDX47/PTGES3/EIF4A3/NOL8/C1QBP/RIOK1/NOP14/PRPF31/SDAD1/EIF3C/FBL/RPF2/ATR/GEMIN6/PRMT7/MRPL22/PUF60/DENR/RPS5/RSL1D1/USP4/PA2G4/WDR77/DDX56/EIF2A/SMN1/BMS1/NHP2/SIRT7/DHX30/RPS9/RIOK3/UTP3/NSUN5/EIF3E/BYSL/COIL/NIP7/NOM1/MRPL1/LTV1/PRPF19/UTP20…
BP	GO:0070498	interleukin-1-mediated signaling pathway	85	0.807014	2.25159	1e-10	2.46e-07	2.26e-07	1409	tags=47%, list=11%, signal=42%	PSMC4/PSMD14/PSMD2/IL1B/PSMC3/PSMD6/PSMD1/PSMC5/PSMC2/PSMC1/PSMA3/PSMD7/PSMD13/PSMD8/PSMD4/PSMD3/NFKB1/PSMB5/PSMA5/PSMC6/PSMB4/PSMD12/PSMB2/PSMD11/IRAK1/IRAK4/PSMB1/PSMA2/TAB1/PSMA1/PSMA6/IKBKB/NOD1/PSMA4/PELI2/IL1RAP/PSMB3/PSMB7/CUL1/RBX1
BP	GO:0034976	response to endoplasmic reticulum stress	231	0.646268	2.01025	3.09e-10	5.69e-07	5.24e-07	1008	tags=27%, list=8%, signal=25%	SDF2L1/DNAJB11/DERL2/HYOU1/HM13/SEL1L/PDIA6/DERL1/SGTA/CFTR/SEC16A/SYVN1/STT3B/SEC61B/HSP90B1/YIF1A/UGGT2/PREB/PDIA4/SRPRA/UGGT1/UFL1/ERP44/MANF/PDX1/CALR/CLGN/MAN1B1/CANX/SSR1/SRPRB/DNAJC10/PSMC6/UFM1/VCP/HSPA5/ARFGAP1/OPA1/LRRK2/FKBP14/MYDGF/NPLOC4/EIF4G1/GFPT1/THBS1/EDEM1/ATP2A2/TBL2/RNF121/UBA5/DNAJC3/SEC31A/USP14/PDIA5/TMCO1/TMED2/DCTN1/ERLEC1/CDK5RAP3/ERMP1/GORASP2/UFC1
BP	GO:0010389	regulation of G2/M transition of mitotic cell cycle	176	0.68624	2.08155	5.76e-10	6.82e-07	6.27e-07	1620	tags=34%, list=13%, signal=30%	PSMC4/MAPRE1/PSMD14/DYNC1H1/PSMD2/PSMC3/PSMD6/PSMD1/PSMC5/PSMC2/HSP90AA1/PSMC1/PSMA3/PSMD7/PSMD13/PSMD8/PSMD4/PSMD3/PSMB5/PSMA5/PSMC6/PSMB4/PSMD12/PSMB2/TUBB4B/CEP192/PSMD11/TUBA1A/CEP164/PSMB1/PSMA2/AKAP9/TUBA4A/DCTN1/CDK5RAP3/PSMA1/PLK4/RCC2/CEP131/PSMA6/PSMA4/CEP250/ODF2/AVEN/PPP2R1A/CEP152/CEP76/PSMB3/CDC6/PSMB7/CDK5RAP2/CUL1/RBX1/CDK4/RAD51C/PSME4/RINT1/PSMD5/TAOK3
CC	GO:1905368	peptidase complex	81	0.802936	2.22564	6.41e-10	6.82e-07	6.27e-07	1403	tags=49%, list=11%, signal=44%	PSMC4/PSMD14/PSMD2/PSMC3/PSMD6/PSMD1/PSMC5/PSMC2/PSMC1/PSMA3/PSMD7/PSMD13/PSMD8/PSMD4/PSMD3/UBE3C/TXNL1/PSMB5/PSMA5/PSMC6/PSMB4/PSMD12/VCP/PSMB2/RAD23B/PSMD11/ADRM1/PSMB1/PSMA2/USP14/PSMA1/PSMA6/SPCS2/SPCS1/PSMA4/PSMB3/RAD23A/PSMB7/SEC11C/UBE3A
BP	GO:0010972	negative regulation of G2/M transition of mitotic cell cycle	86	0.788778	2.21041	6.47e-10	6.82e-07	6.27e-07	1620	tags=44%, list=13%, signal=39%	PSMC4/PSMD14/PSMD2/PSMC3/PSMD6/PSMD1/PSMC5/PSMC2/PSMC1/PSMA3/PSMD7/PSMD13/PSMD8/PSMD4/PSMD3/PSMB5/PSMA5/PSMC6/PSMB4/PSMD12/PSMB2/PSMD11/PSMB1/PSMA2/CDK5RAP3/PSMA1/PSMA6/PSMA4/AVEN/PSMB3/CDC6/PSMB7/CUL1/RBX1/PSME4/RINT1/PSMD5/TAOK3
BP	GO:0010498	proteasomal protein catabolic process	403	0.548816	1.79498	8.59e-10	7.92e-07	7.29e-07	1063	tags=17%, list=8%, signal=16%	SDF2L1/PSMC4/DESI1/DERL2/PSMD14/HM13/SEL1L/PSMD2/DERL1/SGTA/PLAA/PSMC3/PSMD6/PSMD1/SYVN1/STT3B/PSMC5/SEC61B/PSMC2/HSP90B1/UGGT2/PSMC1/UGGT1/PSMA3/UFL1/PSMD7/PSMD13/PSMD8/PSMD4/PSMD3/ANAPC4/MAN1B1/PSMB5/PSMA5/DNAJC10/PSMC6/PSMB4/HSPBP1/PSMD12/VCP/HSPA5/PSMB2/RAD23B/LTN1/LRRK2/PSMD11/NSFL1C/NPLOC4/USP5/FBXW7/USP7/EDEM1/DDI2/KLHL40/PSMB1/ALAD/FBXO38/PSMA2/RNF121/USP14/ERLEC1/PSMA1/BAG5/PSMA6/N4BP1/F…
BP	GO:1902749	regulation of cell cycle G2/M phase transition	186	0.673619	2.05348	1.01e-09	8.29e-07	7.63e-07	1620	tags=32%, list=13%, signal=29%	PSMC4/MAPRE1/PSMD14/DYNC1H1/PSMD2/PSMC3/PSMD6/PSMD1/PSMC5/PSMC2/HSP90AA1/PSMC1/PSMA3/PSMD7/PSMD13/PSMD8/PSMD4/PSMD3/PSMB5/PSMA5/PSMC6/PSMB4/PSMD12/PSMB2/TUBB4B/CEP192/PSMD11/TUBA1A/CEP164/PSMB1/PSMA2/AKAP9/TUBA4A/DCTN1/CDK5RAP3/PSMA1/PLK4/RCC2/CEP131/PSMA6/PSMA4/CEP250/ODF2/AVEN/PPP2R1A/CEP152/CEP76/PSMB3/CDC6/PSMB7/CDK5RAP2/ATAD5/CUL1/RBX1/CDK4/RAD51C/PSME4/RINT1/PSMD5/TAOK3
BP	GO:0031146	SCF-dependent proteasomal ubiquitin-dependent protein catabolic process	79	0.792613	2.18337	1.66e-09	1.23e-06	1.13e-06	1409	tags=43%, list=11%, signal=39%	PSMC4/PSMD14/PSMD2/PSMC3/PSMD6/PSMD1/PSMC5/PSMC2/PSMC1/PSMA3/PSMD7/PSMD13/PSMD8/PSMD4/PSMD3/PSMB5/PSMA5/PSMC6/PSMB4/PSMD12/PSMB2/PSMD11/FBXW7/PSMB1/FBXO38/PSMA2/PSMA1/PSMA6/FBXL6/PSMA4/PSMB3/PSMB7/CUL1/RBX1
CC	GO:0140534	endoplasmic reticulum protein-containing complex	103	0.757019	2.14686	2.08e-09	1.39e-06	1.28e-06	1694	tags=44%, list=13%, signal=38%	SDF2L1/DERL2/HYOU1/HM13/SEL1L/PDIA6/DERL1/SYVN1/STT3B/SEC61B/NBAS/MAGT1/SRPRA/SEC61G/CALR/SRPRB/DNAJC10/VCP/HSPA5/SRP9/OST4/NPLOC4/SEC61A1/TUSC3/SSR4/STT3A/KRTCAP2/UGT1A1/DDOST/RPN2/SPCS2/EMC4/SPCS1/TMEM258/ERN1/DAD1/OSTC/EMC9/SEC11C/PDIA3/FAF1/RINT1/RPN1/EMC10/EMC2
CC	GO:1905369	endopeptidase complex	61	0.832848	2.19987	6.2e-09	3.81e-06	3.51e-06	1403	tags=61%, list=11%, signal=54%	PSMC4/PSMD14/PSMD2/PSMC3/PSMD6/PSMD1/PSMC5/PSMC2/PSMC1/PSMA3/PSMD7/PSMD13/PSMD8/PSMD4/PSMD3/UBE3C/TXNL1/PSMB5/PSMA5/PSMC6/PSMB4/PSMD12/VCP/PSMB2/RAD23B/PSMD11/ADRM1/PSMB1/PSMA2/USP14/PSMA1/PSMA6/PSMA4/PSMB3/RAD23A/PSMB7/UBE3A
BP	GO:1902750	negative regulation of cell cycle G2/M phase transition	92	0.775699	2.1986	7.23e-09	4.1e-06	3.77e-06	1620	tags=41%, list=13%, signal=36%	PSMC4/PSMD14/PSMD2/PSMC3/PSMD6/PSMD1/PSMC5/PSMC2/PSMC1/PSMA3/PSMD7/PSMD13/PSMD8/PSMD4/PSMD3/PSMB5/PSMA5/PSMC6/PSMB4/PSMD12/PSMB2/PSMD11/PSMB1/PSMA2/CDK5RAP3/PSMA1/PSMA6/PSMA4/AVEN/PSMB3/CDC6/PSMB7/CUL1/RBX1/PSME4/RINT1/PSMD5/TAOK3
BP	GO:0035966	response to topologically incorrect protein	164	0.684691	2.07749	7.94e-09	4.17e-06	3.84e-06	932	tags=28%, list=7%, signal=26%	HSPD1/SDF2L1/DNAJB11/DERL2/HYOU1/PDIA6/DERL1/SYVN1/STT3B/HSP90B1/HSP90AA1/YIF1A/UGGT2/PREB/SRPRA/UGGT1/UFL1/ERP44/MANF/CALR/HSPA4L/HSPA9/CLGN/CANX/SSR1/SRPRB/VCP/HSPA5/ARFGAP1/FKBP14/MYDGF/GFPT1/THBS1/HSPA4/EDEM1/TBL2/RNF121/DNAJC3/SEC31A/PDIA5/TMED2/DCTN1/CDK5RAP3/ERMP1/MFN2/HSPA13
BP	GO:0042254	ribosome biogenesis	263	0.606161	1.92833	8.48e-09	4.17e-06	3.84e-06	2866	tags=39%, list=23%, signal=31%	MDN1/HEATR3/PELP1/TSC1/EIF6/WDR36/ERI2/HELQ/RPL5/PDCD11/WDR3/HEATR1/ABCE1/EXOSC6/DDX47/EIF4A3/NOL8/C1QBP/RIOK1/NOP14/SDAD1/FBL/RPF2/MRPL22/RPS5/RSL1D1/PA2G4/DDX56/EIF2A/BMS1/NHP2/SIRT7/DHX30/RPS9/RIOK3/UTP3/NSUN5/BYSL/NIP7/NOM1/MRPL1/LTV1/UTP20/WBP11/DDX10/PRKDC/RRS1/PWP1/FDXACB1/PPAN/EMG1/RRP36/WDR74/NOL10/KRR1/GTF3A/ESF1/UTP18/TEX10/DHX29/ZNF622/KRI1/CHD7/MRPS2/RPP38/ZCCHC4/RPL10/LSM6/EXOSC5/NP…
BP	GO:0035967	cellular response to topologically incorrect protein	134	0.70598	2.07511	9.45e-09	4.36e-06	4.01e-06	932	tags=28%, list=7%, signal=27%	HSPD1/SDF2L1/DNAJB11/DERL2/HYOU1/PDIA6/DERL1/SYVN1/HSP90B1/YIF1A/UGGT2/PREB/SRPRA/UGGT1/UFL1/CALR/HSPA9/CLGN/CANX/SSR1/SRPRB/VCP/HSPA5/ARFGAP1/FKBP14/MYDGF/GFPT1/EDEM1/TBL2/RNF121/DNAJC3/SEC31A/PDIA5/TMED2/DCTN1/CDK5RAP3/ERMP1/HSPA13
BP	GO:0034470	ncRNA processing	337	0.564676	1.8316	1.01e-08	4.36e-06	4.01e-06	2892	tags=34%, list=23%, signal=27%	TSEN15/MDN1/AGO1/TRMT10A/PELP1/EIF6/WDR36/ERI2/DICER1/HELQ/RPL5/MTO1/TRMU/PDCD11/RTCB/METTL2A/INTS8/WDR3/INTS5/HEATR1/TYW1/THADA/EXOSC6/DDX47/EIF4A3/NOL8/RIOK1/NSUN2/NOP14/ELAC1/FBL/RPF2/GRSF1/RSL1D1/PA2G4/DDX56/NSUN6/BMS1/NHP2/SIRT7/TRMT1L/RPS9/RIOK3/UTP3/NSUN5/TRMT61A/BYSL/METTL6/MRPL1/UTP20/DPH3/WBP11/POP1/DDX10/PRKDC/RRS1/FDXACB1/EMG1/RRP36/WDR74/NOL10/KRR1/ESF1/UTP18/TEX10/KRI1/DTWD2/CHD7/GT…
BP	GO:0006401	RNA catabolic process	353	0.555153	1.81696	1.46e-08	6e-06	5.52e-06	1855	tags=25%, list=15%, signal=22%	PSMC4/PATL2/PSMD14/SKIV2L/PSMD2/XRN1/PSMC3/AGO1/PSMD6/PSMD1/IGF2BP1/VIP/PSMC5/PSMC2/NBAS/PSMC1/LRPPRC/PSMA3/PSMD7/PSMD13/PSMD8/PSMD4/PSMD3/TBRG4/PSMB5/SET/RPL5/PSMA5/PSMC6/PSMB4/PSMD12/PSMB2/PSMD11/EIF4G1/DDX6/DHX9/PSMB1/DIS3L/PSMA2/DIS3L2/VIM/SND1/ELAVL1/EXOSC6/LARP1/AXIN2/EIF4A3/RNASEH2C/PSMA1/HNRNPD/NSUN2/PSMA6/PABPC4/SLIRP/PSMA4/FASTKD1/KHSRP/PPP2R1A/GRSF1/SMG1/RPS5/UPF1/CSDE1/ERN1/PSMB3/FAST…
BP	GO:0006986	response to unfolded protein	147	0.686503	2.06054	2.33e-08	9.03e-06	8.31e-06	932	tags=29%, list=7%, signal=27%	HSPD1/DNAJB11/DERL2/HYOU1/PDIA6/DERL1/SYVN1/STT3B/HSP90B1/HSP90AA1/YIF1A/PREB/SRPRA/UFL1/ERP44/MANF/CALR/HSPA4L/HSPA9/CLGN/CANX/SSR1/SRPRB/VCP/HSPA5/ARFGAP1/FKBP14/MYDGF/GFPT1/THBS1/HSPA4/EDEM1/TBL2/RNF121/DNAJC3/SEC31A/PDIA5/TMED2/DCTN1/CDK5RAP3/ERMP1/MFN2/HSPA13
BP	GO:0006402	mRNA catabolic process	325	0.560547	1.81074	2.76e-08	9.8e-06	9.02e-06	1855	tags=25%, list=15%, signal=22%	PSMC4/PATL2/PSMD14/SKIV2L/PSMD2/XRN1/PSMC3/AGO1/PSMD6/PSMD1/IGF2BP1/VIP/PSMC5/PSMC2/NBAS/PSMC1/PSMA3/PSMD7/PSMD13/PSMD8/PSMD4/PSMD3/TBRG4/PSMB5/SET/RPL5/PSMA5/PSMC6/PSMB4/PSMD12/PSMB2/PSMD11/EIF4G1/DDX6/DHX9/PSMB1/PSMA2/DIS3L2/VIM/ELAVL1/EXOSC6/LARP1/AXIN2/EIF4A3/PSMA1/HNRNPD/PSMA6/PABPC4/PSMA4/FASTKD1/KHSRP/PPP2R1A/SMG1/RPS5/UPF1/CSDE1/ERN1/PSMB3/FASTK/TTC37/PSMB7/CNOT11/LARP4B/NANOS1/RPS9/GSPT1…
CC	GO:0000502	proteasome complex	55	0.840434	2.19298	2.79e-08	9.8e-06	9.02e-06	1403	tags=67%, list=11%, signal=60%	PSMC4/PSMD14/PSMD2/PSMC3/PSMD6/PSMD1/PSMC5/PSMC2/PSMC1/PSMA3/PSMD7/PSMD13/PSMD8/PSMD4/PSMD3/UBE3C/TXNL1/PSMB5/PSMA5/PSMC6/PSMB4/PSMD12/VCP/PSMB2/RAD23B/PSMD11/ADRM1/PSMB1/PSMA2/USP14/PSMA1/PSMA6/PSMA4/PSMB3/RAD23A/PSMB7/UBE3A
MF	GO:0051082	unfolded protein binding	91	0.754549	2.13267	3.1e-08	1.04e-05	9.58e-06	1010	tags=35%, list=8%, signal=33%	HSPD1/SCG5/DNAJB11/MDN1/HYOU1/ERO1B/SYVN1/HEATR3/HSP90B1/HSP90AA1/UGGT2/UGGT1/CALR/HSPA9/CLGN/CANX/HSPA5/CCT3/TUBB4B/CCT6A/CCT4/LMAN1/SPG7/NUDC/PTGES3/ERLEC1/TOMM20/PFDN4/CDC37/HSPA13/TRAP1/CCT8
BP	GO:0034620	cellular response to unfolded protein	118	0.709156	2.05643	4.32e-08	1.39e-05	1.27e-05	932	tags=30%, list=7%, signal=28%	HSPD1/DNAJB11/DERL2/HYOU1/PDIA6/DERL1/SYVN1/HSP90B1/YIF1A/PREB/SRPRA/UFL1/CALR/HSPA9/CLGN/CANX/SSR1/SRPRB/VCP/HSPA5/ARFGAP1/FKBP14/MYDGF/GFPT1/EDEM1/TBL2/RNF121/DNAJC3/SEC31A/PDIA5/TMED2/DCTN1/CDK5RAP3/ERMP1/HSPA13
BP	GO:0043161	proteasome-mediated ubiquitin-dependent protein catabolic process	360	0.545903	1.77221	4.64e-08	1.43e-05	1.31e-05	1104	tags=17%, list=9%, signal=16%	PSMC4/DESI1/DERL2/PSMD14/SEL1L/PSMD2/DERL1/SGTA/PLAA/PSMC3/PSMD6/PSMD1/SYVN1/STT3B/PSMC5/SEC61B/PSMC2/HSP90B1/PSMC1/PSMA3/UFL1/PSMD7/PSMD13/PSMD8/PSMD4/PSMD3/ANAPC4/MAN1B1/PSMB5/PSMA5/DNAJC10/PSMC6/PSMB4/HSPBP1/PSMD12/VCP/HSPA5/PSMB2/RAD23B/LTN1/LRRK2/PSMD11/NSFL1C/NPLOC4/USP5/FBXW7/USP7/EDEM1/KLHL40/PSMB1/FBXO38/PSMA2/RNF121/USP14/PSMA1/BAG5/PSMA6/N4BP1/FBXL6/RNF126/PSMA4
BP	GO:0000086	G2/M transition of mitotic cell cycle	226	0.61616	1.91546	4.97e-08	1.47e-05	1.35e-05	1620	tags=28%, list=13%, signal=25%	PSMC4/MAPRE1/PSMD14/DYNC1H1/PSMD2/PSMC3/PSMD6/PSMD1/PSMC5/PSMC2/HSP90AA1/PSMC1/PSMA3/PSMD7/PSMD13/PSMD8/PSMD4/PSMD3/CCNH/PSMB5/PSMA5/PSMC6/PSMB4/PSMD12/PSMB2/TUBB4B/CEP192/BORA/PSMD11/TUBA1A/CEP164/PSMB1/PSMA2/AKAP9/TUBA4A/DCTN1/CDK5RAP3/PSMA1/MNAT1/PLK4/RCC2/CEP131/PSMA6/FBXL6/PSMA4/CEP250/ODF2/AVEN/PPP2R1A/CEP152/CEP76/PSMB3/CDC6/PSMB7/CDK5RAP2/CUL1/RBX1/CDK4/TAF2/RAD51C/PSME4/RINT1/PSMD5/TAOK3
BP	GO:0044839	cell cycle G2/M phase transition	237	0.605794	1.89356	6.28e-08	1.78e-05	1.64e-05	1620	tags=27%, list=13%, signal=24%	PSMC4/MAPRE1/PSMD14/DYNC1H1/PSMD2/PSMC3/PSMD6/PSMD1/PSMC5/PSMC2/HSP90AA1/PSMC1/PSMA3/PSMD7/PSMD13/PSMD8/PSMD4/PSMD3/CCNH/PSMB5/PSMA5/PSMC6/PSMB4/PSMD12/PSMB2/TUBB4B/CEP192/BORA/PSMD11/TUBA1A/CEP164/PSMB1/PSMA2/AKAP9/TUBA4A/DCTN1/CDK5RAP3/PSMA1/MNAT1/PLK4/RCC2/CEP131/PSMA6/FBXL6/PSMA4/CEP250/ODF2/AVEN/PPP2R1A/CEP152/CEP76/PSMB3/CDC6/PSMB7/CDK5RAP2/ATAD5/CUL1/RBX1/CDK4/TAF2/RAD51C/PSME4/RINT1/PSMD5…
BP	GO:0032543	mitochondrial translation	123	0.693126	2.02002	1.71e-07	4.67e-05	4.29e-05	2971	tags=51%, list=23%, signal=40%	LRPPRC/MRPL9/DAP3/MRPS22/MRPL4/COA3/GFM1/TUFM/GFM2/MRPS18C/TACO1/C1QBP/MRPL24/MRPS12/MRPL57/MRPL41/MRPL46/MRPL22/MRPS27/MRPL53/MTIF2/LARS2/MRPL40/AURKAIP1/IARS2/MRPL32/MRPS18B/MRPS26/MRPS21/MRPL37/MRPL54/MRPS25/MRPL1/MRPS31/MRPL34/WARS2/MRPS5/MRPL43/MTRF1/MRPS35/MRPS2/MRPS34/MRPL15/UQCC2/MRPL38/MRPS16/MRPS33/GADD45GIP1/MRPS23/MRPL51/MRPS7/MRPS6/MRPS36/MRPS10/YARS2/MALSU1/MRPL12/MRPL17/MRPL14/MRPS…
CC	GO:0044391	ribosomal subunit	160	0.648441	1.9631	1.86e-07	4.89e-05	4.5e-05	4145	tags=72%, list=33%, signal=49%	MRPL9/DAP3/MRPS22/RPL5/MRPL4/MRPS18C/MRPL24/MRPS12/MRPL57/MRPL41/MRPL46/MRPL22/MRPS27/MRPL53/RPS5/MRPL40/EIF2A/MRPL32/MRPS18B/MRPS26/MRPS21/RPS9/MRPL37/MRPL54/MRPL1/MRPS31/MRPL34/MRPS5/RPS13/MRPL43/DHX29/MRPS35/MRPS2/MRPS34/MRPL15/RPL10/MRPL38/RPS21/MRPS16/MRPS33/MRPL51/LARP4/RPL35/MRPS7/MRPS6/MRPS36/RPL13/MRPS10/RPS6/RPS23/RPS3/UBA52/MALSU1/MRPL12/RPL11/MRPL17/NDUFAB1/MRPL14/RPSA/RPS19/MRPS30/RP…
BP	GO:0016072	rRNA metabolic process	203	0.603196	1.85394	2.28e-07	5.79e-05	5.33e-05	2866	tags=39%, list=23%, signal=31%	MDN1/XRN1/PELP1/EIF6/WDR36/ERI2/HELQ/RPL5/PDCD11/WDR3/DIS3L/HEATR1/EXOSC6/DDX47/EIF4A3/NOL8/RIOK1/NOP14/FBL/RPF2/RSL1D1/PA2G4/DDX56/BMS1/NHP2/SIRT7/RPS9/RIOK3/UTP3/NSUN5/BYSL/MRPL1/UTP20/WBP11/DDX10/PRKDC/RRS1/FDXACB1/EMG1/RRP36/WDR74/NOL10/KRR1/ESF1/UTP18/TEX10/KRI1/CHD7/RPP38/ZCCHC4/LSM6/EXOSC5/NPM3/MPHOSPH6/UTP14A/NAT10/RPS21/SHQ1/GTF2H5/DDX27/RRP12/FTSJ3/RPL35/ERCC2/ABT1/EXOSC9/IMP3/NIFK/RRP1…
BP	GO:0048193	Golgi vesicle transport	317	0.54897	1.75396	2.5e-07	6.16e-05	5.67e-05	1874	tags=29%, list=15%, signal=26%	SLC10A7/INS/HYOU1/SEC24D/DYNC1H1/ATP9B/SEC16A/NBAS/YIF1A/PREB/PDCD6/YIPF5/ARFGEF2/SURF4/TMED10/SEC16B/TRIP11/COPZ2/ARF5/EHD3/COPG2/BBS2/PGAP1/SEC13/VCP/COG4/ARFGAP1/RAB34/VPS13C/LRRK2/AP1G2/KIF3A/SCFD1/ERGIC1/LMAN1/SEC22B/VPS13A/RAB6A/COG1/TMED7/SEC31A/ERGIC3/COPA/TMED4/TMED2/DCTN1/SEC22A/ARF4/COPE/KDELR2/GOLGA3/COPZ1/LMAN2L/GOLGB1/ERGIC2/YIF1B/NSF/KIF5A/ARCN1/GOLGA2/SCYL1/NAPG/SEC23B/TMED9/RAB1B…
BP	GO:0030968	endoplasmic reticulum unfolded protein response	103	0.707081	2.00524	3.04e-07	7.23e-05	6.65e-05	904	tags=31%, list=7%, signal=29%	DNAJB11/DERL2/HYOU1/PDIA6/DERL1/SYVN1/HSP90B1/YIF1A/PREB/SRPRA/UFL1/CALR/CLGN/CANX/SSR1/SRPRB/VCP/HSPA5/ARFGAP1/FKBP14/MYDGF/GFPT1/EDEM1/TBL2/RNF121/DNAJC3/SEC31A/PDIA5/TMED2/DCTN1/CDK5RAP3/ERMP1
CC	GO:0005838	proteasome regulatory particle	21	0.939861	2.00352	3.14e-07	7.24e-05	6.66e-05	618	tags=86%, list=5%, signal=82%	PSMC4/PSMD14/PSMD2/PSMC3/PSMD6/PSMD1/PSMC5/PSMC2/PSMC1/PSMD7/PSMD13/PSMD8/PSMD4/PSMD3/PSMC6/PSMD12/PSMD11/ADRM1
BP	GO:0042590	antigen processing and presentation of exogenous peptide antigen via MHC class I	67	0.776103	2.084	5.12e-07	0.000114463	0.000105273	1104	tags=46%, list=9%, signal=42%	PSMC4/PSMD14/PSMD2/PSMC3/PSMD6/PSMD1/PSMC5/PSMC2/PSMC1/PSMA3/PSMD7/PSMD13/PSMD8/PSMD4/CALR/PSMD3/PSMB5/PSMA5/PSMC6/PSMB4/PSMD12/PSMB2/PSMD11/MFSD6/PSMB1/PSMA2/SEC22B/PSMA1/PSMA6/IKBKB/PSMA4
BP	GO:0140053	mitochondrial gene expression	150	0.648733	1.94412	5.98e-07	0.000129771	0.000119353	3208	tags=50%, list=25%, signal=38%	TRMT10A/LRPPRC/MRPL9/TBRG4/DAP3/MRPS22/MTO1/MRPL4/COA3/GFM1/TUFM/GFM2/MRPS18C/TACO1/C1QBP/MRPL24/MRPS12/MRPL57/MRPL41/MRPL46/MRPL22/MRPS27/MRPL53/MTIF2/LARS2/MRPL40/AURKAIP1/IARS2/MRPL32/MRPS18B/MRPS26/MRPS21/MRPL37/MRPL54/MRPS25/MRPL1/MRPS31/MRPL34/WARS2/MRPS5/MRPL43/MTRF1/MRPS35/MRPS2/MRPS34/MRPL15/UQCC2/MRPL38/MRPS16/MRPS33/GADD45GIP1/MRPS23/MRPL51/PNPT1/MRPS7/MRPS6/MRPS36/MRPS10/YARS2/MALSU1/…
CC	GO:0022624	proteasome accessory complex	23	0.928156	2.03789	7.03e-07	0.000148299	0.000136393	618	tags=78%, list=5%, signal=75%	PSMC4/PSMD14/PSMD2/PSMC3/PSMD6/PSMD1/PSMC5/PSMC2/PSMC1/PSMD7/PSMD13/PSMD8/PSMD4/PSMD3/PSMC6/PSMD12/PSMD11/ADRM1
BP	GO:0006364	rRNA processing	197	0.600206	1.84127	9.5e-07	0.000194675	0.000179045	2936	tags=41%, list=23%, signal=32%	MDN1/PELP1/EIF6/WDR36/ERI2/HELQ/RPL5/PDCD11/WDR3/HEATR1/EXOSC6/DDX47/EIF4A3/NOL8/RIOK1/NOP14/FBL/RPF2/RSL1D1/PA2G4/DDX56/BMS1/NHP2/SIRT7/RPS9/RIOK3/UTP3/NSUN5/BYSL/MRPL1/UTP20/WBP11/DDX10/PRKDC/RRS1/FDXACB1/EMG1/RRP36/WDR74/NOL10/KRR1/ESF1/UTP18/TEX10/KRI1/CHD7/RPP38/ZCCHC4/LSM6/EXOSC5/NPM3/MPHOSPH6/UTP14A/NAT10/RPS21/SHQ1/GTF2H5/DDX27/RRP12/FTSJ3/RPL35/ERCC2/ABT1/EXOSC9/IMP3/NIFK/RRP1/SNU13/RPS6…
CC	GO:0098798	mitochondrial protein-containing complex	199	0.598449	1.83643	1.07e-06	0.000213303	0.000196178	3208	tags=48%, list=25%, signal=36%	PMPCB/FOXRED1/MRPL9/HSPA9/HADHA/DAP3/MRPS22/DNAJC11/MRPL4/SPG7/UQCRC1/MRPS18C/IMMT/TOMM20/MRPL24/MRPS12/MRPL57/MRPL41/MRPL46/MRPL22/MRPS27/MRPL53/CYC1/NDUFV2/TIMM8B/MRPL40/PHB2/MRPL32/MRPS18B/MRPS26/MRPS21/MRPL37/DBT/NDUFV1/MRPL54/SAMM50/MRPS31/MRPL34/PDHA1/BCS1L/MRPS5/MICU3/MRPL43/IMMP1L/MRPS35/UQCRQ/TIMM13/MRPS2/MRPS34/MRPL15/NDUFAF1/PPIF/MRPL38/NDUFA5/MRPS16/MRPS33/UQCRHL/DNAJC15/NDUFA13/MRPL5…
MF	GO:0003735	structural constituent of ribosome	142	0.654656	1.94594	1.12e-06	0.000216984	0.000199564	4145	tags=73%, list=33%, signal=49%	MRPL9/DAP3/MRPS22/RPL5/MRPL4/MRPS18C/MRPL24/MRPS12/MRPL57/MRPL41/MRPL46/MRPL22/RPS5/MRPL32/MRPS18B/MRPS21/RPS9/MRPL37/MRPL54/MRPS25/MRPL1/MRPS31/MRPL34/MRPS5/RPS13/MRPL43/MRPS35/MRPS2/MRPS34/MRPL15/RPL10/RPS21/MRPS16/RPL22L1/MRPS33/MRPS23/MRPL51/RPL35/MRPS7/MRPS6/MRPS36/RPL13/RPS6/RPS23/RPS3/UBA52/MRPL12/RPL11/MRPL17/MRPL14/RPSA/RPS19/MRPS30/RPL14/MRPS24/RPS18/RPS26/MRPL13/RPS28/RPL28/RPS10/RPS7/…
BP	GO:0002479	antigen processing and presentation of exogenous peptide antigen via MHC class I, TAP-dependent	64	0.77423	2.07818	1.53e-06	0.000289212	0.000265993	1104	tags=47%, list=9%, signal=43%	PSMC4/PSMD14/PSMD2/PSMC3/PSMD6/PSMD1/PSMC5/PSMC2/PSMC1/PSMA3/PSMD7/PSMD13/PSMD8/PSMD4/CALR/PSMD3/PSMB5/PSMA5/PSMC6/PSMB4/PSMD12/PSMB2/PSMD11/PSMB1/PSMA2/SEC22B/PSMA1/PSMA6/IKBKB/PSMA4
BP	GO:0070972	protein localization to endoplasmic reticulum	129	0.661685	1.94063	2e-06	0.000361205	0.000332206	1449	tags=22%, list=11%, signal=20%	SGTA/SEC16A/SEC61B/SRPRA/GJA1/SEC16B/SEC61G/RAB3GAP2/SRPRB/RPL5/HSPA5/LRRK2/SRP9/SSR3/SEC61A1/EDEM1/SRP19/SRP72/TRAM1/SRP14/SRP54/KDELR2/SPCS2/SPCS1/SEC62/RPS5/RYR2/GBF1/RPS9
BP	GO:0006888	endoplasmic reticulum to Golgi vesicle-mediated transport	176	0.610148	1.85074	2.01e-06	0.000361205	0.000332206	1874	tags=37%, list=15%, signal=32%	INS/HYOU1/SEC24D/DYNC1H1/SEC16A/YIF1A/PREB/PDCD6/YIPF5/TMED10/SEC16B/TRIP11/COPZ2/COPG2/PGAP1/SEC13/VCP/COG4/ARFGAP1/LRRK2/SCFD1/ERGIC1/LMAN1/SEC22B/COG1/TMED7/SEC31A/ERGIC3/COPA/TMED4/TMED2/DCTN1/SEC22A/ARF4/COPE/KDELR2/COPZ1/LMAN2L/GOLGB1/ERGIC2/YIF1B/NSF/ARCN1/GOLGA2/SEC23B/TMED9/RAB1B/USO1/ARFGAP2/GBF1/PEF1/COG7/RINT1/COPB1/COPB2/RAB1A/SPTBN1/LMAN2/SEC24A/DYNC1LI1/BET1/VAPB/GOSR1/GOSR2/DCTN2
BP	GO:0043487	regulation of RNA stability	166	0.614366	1.86076	2.65e-06	0.000466571	0.000429113	1363	tags=30%, list=11%, signal=27%	PSMC4/PSMD14/PSMD2/XRN1/PSMC3/PSMD6/PSMD1/IGF2BP1/VIP/PSMC5/PSMC2/PSMC1/PSMA3/PSMD7/PSMD13/PSMD8/PSMD4/PSMD3/TBRG4/PSMB5/SET/PSMA5/PSMC6/PSMB4/PSMD12/PSMB2/PSMD11/EIF4G1/DHX9/PSMB1/PSMA2/VIM/ELAVL1/EXOSC6/LARP1/AXIN2/PSMA1/HNRNPD/NSUN2/PSMA6/PABPC4/PSMA4/FASTKD1/KHSRP/UPF1/PSMB3/FASTK/PSMB7/LARP4B
BP	GO:0070646	protein modification by small protein removal	236	0.566308	1.77174	3.12e-06	0.000535482	0.000492491	1289	tags=21%, list=10%, signal=19%	PSMC4/DESI1/PSMD14/PSMD2/PSMC3/CFTR/PSMD6/PSMD1/APC/PSMC5/PSMC2/PSMC1/PSMA3/PSMD7/PSMD13/PSMD8/PSMD4/PSMD3/PSMB5/PSMA5/PSMC6/PSMB4/PSMD12/VCP/PSMB2/RAD23B/PSMD11/USP5/USP7/ADRM1/PSMB1/PSMA2/WDR20/COPS4/ESR1/USP14/TAB1/TOMM20/PSMA1/STAM/PSMA6/COPS8/USP15/PSMA4/MDM4/OTUD7B/PSMB3/USP4/INO80/RAD23A
BP	GO:0043488	regulation of mRNA stability	157	0.621899	1.87813	3.23e-06	0.000542206	0.000498675	1363	tags=31%, list=11%, signal=28%	PSMC4/PSMD14/PSMD2/XRN1/PSMC3/PSMD6/PSMD1/IGF2BP1/VIP/PSMC5/PSMC2/PSMC1/PSMA3/PSMD7/PSMD13/PSMD8/PSMD4/PSMD3/TBRG4/PSMB5/SET/PSMA5/PSMC6/PSMB4/PSMD12/PSMB2/PSMD11/EIF4G1/DHX9/PSMB1/PSMA2/VIM/ELAVL1/EXOSC6/LARP1/AXIN2/PSMA1/HNRNPD/PSMA6/PABPC4/PSMA4/FASTKD1/KHSRP/UPF1/PSMB3/FASTK/PSMB7/LARP4B
BP	GO:0000209	protein polyubiquitination	269	0.544681	1.73594	3.51e-06	0.00057541	0.000529214	1409	tags=17%, list=11%, signal=16%	RUSC1/PSMC4/PSMD14/PSMD2/PLAA/PSMC3/PSMD6/PSMD1/SYVN1/PSMC5/FBXO41/PSMC2/PSMC1/PSMA3/PSMD7/PSMD13/PSMD8/PSMD4/PSMD3/ANAPC4/UBE3C/PSMB5/PSMA5/PSMC6/PSMB4/HECTD2/PSMD12/PSMB2/PSMD11/FBXW7/PSMB1/FBXO38/PSMA2/HERC6/PSMA1/TRIP12/PSMA6/RNF126/TRAF4/PSMA4/PELI2/PSMB3/TMEM129/PSMB7/UBE3A/CUL1/RBX1
BP	GO:0031145	anaphase-promoting complex-dependent catabolic process	75	0.739317	2.0099	3.83e-06	0.000593645	0.000545985	653	tags=33%, list=5%, signal=32%	PSMC4/PSMD14/PSMD2/PSMC3/PSMD6/PSMD1/PSMC5/PSMC2/PSMC1/PSMA3/PSMD7/PSMD13/PSMD8/PSMD4/PSMD3/ANAPC4/PSMB5/PSMA5/PSMC6/PSMB4/PSMD12/PSMB2/PSMD11/PSMB1/PSMA2
BP	GO:1903311	regulation of mRNA metabolic process	277	0.528588	1.68225	3.92e-06	0.000593645	0.000545985	1855	tags=28%, list=15%, signal=25%	PSMC4/KHDRBS3/PSMD14/PSMD2/XRN1/PSMC3/PSMD6/PSMD1/IGF2BP1/VIP/PSMC5/PSMC2/NBAS/PSMC1/PSMA3/PSMD7/PSMD13/PSMD8/PSMD4/PSMD3/TBRG4/PSMB5/SET/PSMA5/PSMC6/PSMB4/PSMD12/PSMB2/PSMD11/EIF4G1/DHX9/MBNL2/PSMB1/PSMA2/YTHDC1/CDK11B/VIM/ELAVL1/RBM4/NOVA1/EXOSC6/LARP1/AXIN2/RBM15/C1QBP/PSMA1/HNRNPD/NUP98/PSMA6/PABPC4/PSMA4/FASTKD1/KHSRP/PUF60/UPF1/NCL/PSMB3/FASTK/TIA1/PSMB7/LARP4B/NANOS1/SRSF4/HNRNPU/PSME4/HSF…
BP	GO:0006415	translational termination	96	0.70405	2.00911	3.92e-06	0.000593645	0.000545985	2971	tags=58%, list=23%, signal=45%	OGFOD1/MRPL9/DAP3/MRPS22/MRPL4/ABCE1/GFM2/MRPS18C/MRPL24/MRPS12/MRPL57/MRPL41/GLE1/MRPL46/MRPL22/MRPS27/MRPL53/MRPL40/UPF1/AURKAIP1/MRPL32/MRPS18B/MRPS26/MRPS21/GSPT1/MRPL37/MRPL54/MRPS25/MRPL1/MRPS31/MRPL34/MRPS5/MRPL43/MTRF1/MRPS35/MRPS2/MRPS34/MRPL15/MRPL38/ETF1/MRPS16/MRPS33/GADD45GIP1/MRPS23/MRPL51/MRPS7/MRPS6/MRPS36/MRPS10/MRPL12/MRPL17/APEH/MRPL14/MRPS30/CHCHD1/MRPS24
BP	GO:0034655	nucleobase-containing compound catabolic process	460	0.478608	1.58688	3.94e-06	0.000593645	0.000545985	1648	tags=20%, list=13%, signal=18%	PSMC4/PATL2/PSMD14/SKIV2L/PSMD2/XRN1/PSMC3/AGO1/PSMD6/PSMD1/IGF2BP1/UPP1/VIP/PSMC5/PSMC2/NBAS/PSMC1/LRPPRC/PSMA3/PSMD7/PSMD13/PSMD8/PSMD4/PSMD3/ERI2/DICER1/TBRG4/PSMB5/ENTPD4/SET/RPL5/PSMA5/PSMC6/PSMB4/PSMD12/VCP/PSMB2/PSMD11/EIF4G1/DDX6/DHX9/PSMB1/ABCD1/DIS3L/PSMA2/DIS3L2/NUDT5/VIM/SND1/ELAVL1/EXOSC6/LARP1/AXIN2/EIF4A3/RNASEH2C/PSMA1/HNRNPD/NSUN2/PSMA6/PDE2A/ENTPD7/PABPC4/SLIRP/PSMA4/FASTKD1/KHS…
MF	GO:0005201	extracellular matrix structural constituent	135	-0.745018	-1.88494	4.32e-06	0.000637055	0.00058591	862	tags=22%, list=7%, signal=21%	ELN/NID1/COL6A6/VCAN/SPARC/OTOL1/TGFBI/PRELP/NID2/COL6A1/MMRN2/MFAP4/COL1A1/CRELD1/COL11A1/AEBP1/COL1A2/VWA1/ANOS1/MFAP2/PODN/CTHRC1/COL6A2/HMCN2/ECM1/DCN/COL8A2/LUM/MATN3/POSTN
BP	GO:0045229	external encapsulating structure organization	318	-0.62461	-1.71372	4.78e-06	0.000692122	0.000636556	1910	tags=30%, list=15%, signal=26%	GPM6B/CTSG/COL2A1/NPHS1/COL9A3/CREB3L1/TNFRSF1B/CDH1/ADAMTS18/MATN1/ITGA6/B4GALT1/SPINT1/ADAM10/ADAMTS2/SPOCK2/FBLN1/JAM2/CST3/WT1/COL28A1/SMAD3/TTR/TCF15/CFLAR/FAP/EGFL6/SMPD3/CTSS/FN1/AGT/SCUBE1/NCAN/ITGA11/F11R/LOX/GFOD2/MMP23B/SCUBE3/ELN/NID1/ITGAM/FSCN1/ANTXR1/MATN4/ETS1/ICAM5/VCAN/SPARC/OTOL1/SFRP2/HPN/GAS2/RGCC/NDNF/TGFBI/DDR1/ADAMTSL1/MMP14/A2M/SH3PXD2A/PDGFA/NID2/COL6A1/MFAP4/COL1A1/PLG/…
BP	GO:0038061	NIK/NF-kappaB signaling	132	0.648331	1.89404	4.93e-06	0.0006957	0.000639846	1404	tags=36%, list=11%, signal=32%	PSMC4/PSMD14/PSMD2/RELB/IL1B/PSMC3/PPM1B/PSMD6/PSMD1/PSMC5/PSMC2/PSMC1/PSMA3/PSMD7/PSMD13/PSMD8/PSMD4/CALR/PSMD3/EDARADD/DICER1/CARD14/PSMB5/PSMA5/IKBKE/PSMC6/PSMB4/PSMD12/PSMB2/PSMD11/IRAK1/PSMB1/PSMA2/PSMA1/ADIPOR1/NLRP12/PSMA6/COPS8/TRAF4/NOD1/PSMA4/PHB2/PSMB3/HAVCR2/PSMB7/BCL3/CUL1
BP	GO:0071826	ribonucleoprotein complex subunit organization	175	0.600565	1.82163	5.01e-06	0.0006957	0.000639846	3413	tags=48%, list=27%, signal=36%	MDN1/AGO1/HSP90AA1/EIF6/DICER1/RPL5/STRAP/PRPF8/VCP/PTBP2/SNRNP200/EIF4H/DHX9/YTHDC1/CLNS1A/PTGES3/PRPF31/EIF3C/RPF2/ATR/GEMIN6/PRMT7/PUF60/DENR/RPS5/USP4/WDR77/SMN1/DHX30/EIF3E/COIL/PRPF19/SNRPG/RUVBL2/SF3B1/PRKDC/RRS1/PPAN/EIF4B/DHX29/POLR2D/EIF5/SNRPF/RPL10/KLC1/AGO4/EIF3M/EIF3L/GEMIN8/PRMT5/EIF2S2/SHQ1/MRPS7/CRNKL1/ABT1/SNRPE/RPL11/MRTO4/PRPF3/RPSA/RPS19/TAF9/GEMIN5/SF3A1/NUFIP1/AGO3/RPS28/DD…
BP	GO:0022618	ribonucleoprotein complex assembly	169	0.599559	1.8203	5.09e-06	0.0006957	0.000639846	3413	tags=49%, list=27%, signal=36%	MDN1/AGO1/HSP90AA1/EIF6/DICER1/RPL5/STRAP/PRPF8/PTBP2/SNRNP200/EIF4H/DHX9/YTHDC1/CLNS1A/PTGES3/PRPF31/EIF3C/RPF2/ATR/GEMIN6/PRMT7/PUF60/DENR/RPS5/USP4/WDR77/SMN1/DHX30/EIF3E/COIL/PRPF19/SNRPG/RUVBL2/SF3B1/PRKDC/RRS1/PPAN/EIF4B/DHX29/POLR2D/EIF5/SNRPF/RPL10/AGO4/EIF3M/EIF3L/GEMIN8/PRMT5/EIF2S2/SHQ1/MRPS7/CRNKL1/ABT1/SNRPE/RPL11/MRTO4/PRPF3/RPSA/RPS19/TAF9/GEMIN5/SF3A1/NUFIP1/AGO3/RPS28/DDX39B/BOP1…
BP	GO:0006487	protein N-linked glycosylation	66	0.744321	2.00047	5.72e-06	0.000767756	0.000706117	1291	tags=47%, list=10%, signal=42%	NUDT14/DOLPP1/MOGS/STT3B/UGGT2/MAGT1/UGGT1/DPM3/OST4/GFPT1/ALG12/TUSC3/STT3A/DPM1/LMAN1/KRTCAP2/ALG5/DDOST/RPN2/ALG6/NUS1/ALG3/MGAT4A/PGM3/ALG1/PMM2/TMEM258/TMEM165/DPAGT1/DAD1/OSTC
BP	GO:0006611	protein export from nucleus	161	0.600458	1.81779	5.98e-06	0.000788087	0.000724816	2257	tags=29%, list=18%, signal=24%	DESI1/CCHCR1/NUP205/IL1B/TSC1/NUP35/UHMK1/XPO4/CALR/EIF6/FYTTD1/HSPA9/SEC13/NUP210/NUP188/NUP107/TPR/YTHDC1/ABCE1/EIF4A3/NUP98/NSUN2/SDAD1/GLE1/STRADB/SMG1/UPF1/NUP155/NUP153/CSE1L/SIRT7/SRSF4/NUTF2/LTV1/RRS1/RANGAP1/NCBP2/ANKLE1/POLR2D/XPOT/CPSF1/TXN/SP100/NUP160/SSB/NUP85/NUP88
BP	GO:0038095	Fc-epsilon receptor signaling pathway	97	0.682404	1.94339	6.26e-06	0.000811256	0.000746125	1404	tags=38%, list=11%, signal=34%	PSMC4/PSMD14/PSMD2/PSMC3/PSMD6/PSMD1/PSMC5/PSMC2/PSMC1/PSMA3/PSMD7/PSMD13/PSMD8/PSMD4/PSMD3/NFKB1/PSMB5/PSMA5/PSMC6/PSMB4/PSMD12/PSMB2/ITK/PSMD11/PRKCQ/PSMB1/PSMA2/TAB1/PSMA1/PSMA6/IKBKB/NR4A3/PSMA4/PPP3CA/PSMB3/PSMB7/CUL1
BP	GO:0002474	antigen processing and presentation of peptide antigen via MHC class I	83	0.712678	1.97133	7.11e-06	0.000893388	0.000821663	986	tags=41%, list=8%, signal=38%	PSMC4/SEC24D/PSMD14/PSMD2/PSMC3/PSMD6/PSMD1/PSMC5/PSMC2/PSMC1/PSMA3/PSMD7/PSMD13/PSMD8/PSMD4/CALR/PSMD3/PSMB5/CANX/PSMA5/SEC13/PSMC6/PSMB4/PSMD12/PSMB2/PSMD11/MFSD6/PSMB1/PSMA2/SEC22B/SEC31A/PSMA1/PSMA6/IKBKB
CC	GO:0005840	ribosome	193	0.580963	1.78636	7.15e-06	0.000893388	0.000821663	3201	tags=46%, list=25%, signal=35%	GCN1/MRPL9/DAP3/MRPS22/RPL5/MRPL4/DHX9/MRPS18C/LARP1/APOD/MRPL24/MRPS12/MRPL57/MRPL41/MRPL46/MRPL22/MRPS27/MRPL53/RRBP1/RPS5/MRPL40/AURKAIP1/LARP4B/EIF2A/MRPL32/MRPS18B/MRPS26/MRPS21/RPS9/MRPL37/MRPL54/MRPS25/MRPL1/MRPS31/MRPL34/MRPS5/RPS13/MRPL43/DHX29/MRPS35/SRP68/MRPS2/MRPS34/MRPL15/RPL10/MRPL38/RPS21/MRPS16/RPL22L1/MRPS33/GADD45GIP1/MRPS23/MRPL51/LARP4/PNPT1/RPL35/MRPS7/MRPS6/MRPS36/RPL13/MRP…
BP	GO:0036503	ERAD pathway	86	0.695991	1.95039	7.26e-06	0.000893388	0.000821663	857	tags=26%, list=7%, signal=24%	SDF2L1/DERL2/HM13/SEL1L/DERL1/SGTA/SYVN1/STT3B/SEC61B/HSP90B1/UGGT2/UGGT1/MAN1B1/DNAJC10/PSMC6/VCP/HSPA5/NPLOC4/EDEM1/RNF121/USP14/ERLEC1
BP	GO:0016579	protein deubiquitination	221	0.557943	1.73587	7.94e-06	0.000957937	0.00088103	1289	tags=21%, list=10%, signal=19%	PSMC4/PSMD14/PSMD2/PSMC3/CFTR/PSMD6/PSMD1/APC/PSMC5/PSMC2/PSMC1/PSMA3/PSMD7/PSMD13/PSMD8/PSMD4/PSMD3/PSMB5/PSMA5/PSMC6/PSMB4/PSMD12/VCP/PSMB2/RAD23B/PSMD11/USP5/USP7/ADRM1/PSMB1/PSMA2/WDR20/ESR1/USP14/TAB1/TOMM20/PSMA1/STAM/PSMA6/USP15/PSMA4/MDM4/OTUD7B/PSMB3/USP4/INO80/RAD23A
CC	GO:0030312	external encapsulating structure	413	-0.596529	-1.66503	8.18e-06	0.000957937	0.00088103	1232	tags=23%, list=10%, signal=21%	CTSS/CTSH/FN1/CTSD/SEMA7A/AGT/S100A6/C1QC/NCAN/SCARA3/USH2A/LOX/GFOD2/COL20A1/CTSC/PTN/MMP23B/APOA1/C1QA/GP1BA/F9/ELN/P3H2/ITIH2/NID1/CXCL12/WNT5B/MATN4/VWA2/COL6A6/CDH2/LRRC17/VCAN/SPARC/OTOL1/ITIH5/ANGPT1/SFRP2/PSAP/SERPINA1/TLR3/ANGPT2/NDNF/TGFBI/ADAMTSL1/MMP14/A2M/MST1/APOE/GDF10/PRELP/NID2/COL6A1/MMRN2/MFAP4/COL1A1/CRELD1/SERPING1/PLG/SERPINH1/LAD1/COL11A1/AEBP1/SMOC1/COL1A2/VWA1/ANGPTL7/HAP…
CC	GO:0031012	extracellular matrix	413	-0.596529	-1.66503	8.18e-06	0.000957937	0.00088103	1232	tags=23%, list=10%, signal=21%	CTSS/CTSH/FN1/CTSD/SEMA7A/AGT/S100A6/C1QC/NCAN/SCARA3/USH2A/LOX/GFOD2/COL20A1/CTSC/PTN/MMP23B/APOA1/C1QA/GP1BA/F9/ELN/P3H2/ITIH2/NID1/CXCL12/WNT5B/MATN4/VWA2/COL6A6/CDH2/LRRC17/VCAN/SPARC/OTOL1/ITIH5/ANGPT1/SFRP2/PSAP/SERPINA1/TLR3/ANGPT2/NDNF/TGFBI/ADAMTSL1/MMP14/A2M/MST1/APOE/GDF10/PRELP/NID2/COL6A1/MMRN2/MFAP4/COL1A1/CRELD1/SERPING1/PLG/SERPINH1/LAD1/COL11A1/AEBP1/SMOC1/COL1A2/VWA1/ANGPTL7/HAP…
BP	GO:0070125	mitochondrial translational elongation	83	0.709751	1.96324	8.85e-06	0.00102083	0.000938876	2971	tags=59%, list=23%, signal=46%	MRPL9/DAP3/MRPS22/MRPL4/GFM1/TUFM/MRPS18C/MRPL24/MRPS12/MRPL57/MRPL41/MRPL46/MRPL22/MRPS27/MRPL53/MRPL40/AURKAIP1/MRPL32/MRPS18B/MRPS26/MRPS21/MRPL37/MRPL54/MRPS25/MRPL1/MRPS31/MRPL34/MRPS5/MRPL43/MRPS35/MRPS2/MRPS34/MRPL15/MRPL38/MRPS16/MRPS33/GADD45GIP1/MRPS23/MRPL51/MRPS7/MRPS6/MRPS36/MRPS10/MRPL12/MRPL17/MRPL14/MRPS30/CHCHD1/MRPS24
BP	GO:0030198	extracellular matrix organization	317	-0.624861	-1.71439	9.61e-06	0.00107493	0.000988626	1910	tags=30%, list=15%, signal=26%	GPM6B/CTSG/COL2A1/NPHS1/COL9A3/CREB3L1/TNFRSF1B/CDH1/ADAMTS18/MATN1/ITGA6/B4GALT1/SPINT1/ADAM10/ADAMTS2/SPOCK2/FBLN1/JAM2/CST3/WT1/COL28A1/SMAD3/TTR/TCF15/CFLAR/FAP/EGFL6/SMPD3/CTSS/FN1/AGT/SCUBE1/NCAN/ITGA11/F11R/LOX/GFOD2/MMP23B/SCUBE3/ELN/NID1/ITGAM/FSCN1/ANTXR1/MATN4/ETS1/ICAM5/VCAN/SPARC/OTOL1/SFRP2/HPN/GAS2/RGCC/NDNF/TGFBI/DDR1/ADAMTSL1/MMP14/A2M/SH3PXD2A/PDGFA/NID2/COL6A1/MFAP4/COL1A1/PLG/…
BP	GO:0043062	extracellular structure organization	317	-0.624861	-1.71439	9.61e-06	0.00107493	0.000988626	1910	tags=30%, list=15%, signal=26%	GPM6B/CTSG/COL2A1/NPHS1/COL9A3/CREB3L1/TNFRSF1B/CDH1/ADAMTS18/MATN1/ITGA6/B4GALT1/SPINT1/ADAM10/ADAMTS2/SPOCK2/FBLN1/JAM2/CST3/WT1/COL28A1/SMAD3/TTR/TCF15/CFLAR/FAP/EGFL6/SMPD3/CTSS/FN1/AGT/SCUBE1/NCAN/ITGA11/F11R/LOX/GFOD2/MMP23B/SCUBE3/ELN/NID1/ITGAM/FSCN1/ANTXR1/MATN4/ETS1/ICAM5/VCAN/SPARC/OTOL1/SFRP2/HPN/GAS2/RGCC/NDNF/TGFBI/DDR1/ADAMTSL1/MMP14/A2M/SH3PXD2A/PDGFA/NID2/COL6A1/MFAP4/COL1A1/PLG/…
BP	GO:0061013	regulation of mRNA catabolic process	176	0.590524	1.79122	9.97e-06	0.00109834	0.00101016	1648	tags=32%, list=13%, signal=28%	PSMC4/PSMD14/PSMD2/XRN1/PSMC3/PSMD6/PSMD1/IGF2BP1/VIP/PSMC5/PSMC2/NBAS/PSMC1/PSMA3/PSMD7/PSMD13/PSMD8/PSMD4/PSMD3/TBRG4/PSMB5/SET/PSMA5/PSMC6/PSMB4/PSMD12/PSMB2/PSMD11/EIF4G1/DHX9/PSMB1/PSMA2/VIM/ELAVL1/EXOSC6/LARP1/AXIN2/PSMA1/HNRNPD/PSMA6/PABPC4/PSMA4/FASTKD1/KHSRP/UPF1/PSMB3/FASTK/PSMB7/LARP4B/NANOS1/HNRNPU/PSME4/PSMD5/PKP1/ANGEL2/IGF2BP2
BP	GO:0032527	protein exit from endoplasmic reticulum	40	0.81688	2.0004	1.1e-05	0.00118872	0.00109329	857	tags=40%, list=7%, signal=37%	DERL2/HM13/SEL1L/DERL1/SEC16A/SYVN1/SEC61B/HSP90B1/PREB/SEC16B/SEC13/VCP/NPLOC4/EDEM1/TM9SF4/ERLEC1
BP	GO:0070126	mitochondrial translational termination	84	0.706649	1.95676	1.16e-05	0.00121112	0.00111389	2971	tags=58%, list=23%, signal=45%	MRPL9/DAP3/MRPS22/MRPL4/GFM2/MRPS18C/MRPL24/MRPS12/MRPL57/MRPL41/MRPL46/MRPL22/MRPS27/MRPL53/MRPL40/AURKAIP1/MRPL32/MRPS18B/MRPS26/MRPS21/MRPL37/MRPL54/MRPS25/MRPL1/MRPS31/MRPL34/MRPS5/MRPL43/MTRF1/MRPS35/MRPS2/MRPS34/MRPL15/MRPL38/MRPS16/MRPS33/GADD45GIP1/MRPS23/MRPL51/MRPS7/MRPS6/MRPS36/MRPS10/MRPL12/MRPL17/MRPL14/MRPS30/CHCHD1/MRPS24
BP	GO:0072594	establishment of protein localization to organelle	477	0.456028	1.51725	1.16e-05	0.00121112	0.00111389	2001	tags=21%, list=16%, signal=19%	HSPD1/NAGPA/NUDT19/CABP1/PMPCB/SGTA/HEATR3/HAX1/SEC61B/HSP90AA1/SRPRA/NUP35/VPS13D/SEC61G/RAB3GAP2/SRPRB/PITRM1/RPL5/MED1/SEC13/SAE1/UFM1/HSPA5/PEX10/CCT3/VPS13C/LRRK2/SRP9/SSR3/CCT6A/SEC61A1/HSPA4/NUP188/FBXW7/CCT4/EDEM1/COX18/LMAN1/NUP107/TPR/VPS13A/SRP19/ELAVL1/SRP72/MIPEP/TRAM1/IPO4/TSPO/APOD/SRP14/SRP54/TOMM20/IPO5/NUP98/MFN2/STAM/SPCS2/CCT8/IPO7/ATR/SCRIB/SPCS1/ATG13/SEC62/PPP3CA/RPS5/AGPS/…
BP	GO:0072599	establishment of protein localization to endoplasmic reticulum	106	0.661532	1.89462	1.17e-05	0.00121112	0.00111389	1449	tags=22%, list=11%, signal=19%	SGTA/SEC61B/SRPRA/SEC61G/RAB3GAP2/SRPRB/RPL5/HSPA5/SRP9/SSR3/SEC61A1/EDEM1/SRP19/SRP72/TRAM1/SRP14/SRP54/SPCS2/SPCS1/SEC62/RPS5/RYR2/RPS9
BP	GO:0019884	antigen processing and presentation of exogenous antigen	144	0.612383	1.82272	1.24e-05	0.00127592	0.00117349	1350	tags=31%, list=11%, signal=28%	PSMC4/SEC24D/PSMD14/DYNC1H1/PSMD2/PSMC3/PSMD6/PSMD1/PSMC5/PSMC2/PSMC1/PSMA3/PSMD7/PSMD13/PSMD8/PSMD4/CALR/PSMD3/PSMB5/CANX/PSMA5/SEC13/PSMC6/PSMB4/PSMD12/PSMB2/PSMD11/MFSD6/KIF3A/PSMB1/PSMA2/SEC22B/SEC31A/DCTN1/PSMA1/PSMA6/CTSE/IKBKB/CLTC/PSMA4/ACTR1B/PSMB3/KIF5A/PSMB7
BP	GO:0034660	ncRNA metabolic process	400	0.482526	1.57681	1.26e-05	0.00127803	0.00117542	2892	tags=35%, list=23%, signal=28%	TSEN15/MDN1/XRN1/TDRD9/AGO1/ASZ1/TRMT10A/PELP1/EIF6/WDR36/ERI2/NFKB1/DICER1/HELQ/RPL5/MTO1/TRMU/PDCD11/RTCB/METTL2A/INTS8/WDR3/DIS3L/DIS3L2/INTS5/HEATR1/TYW1/SND1/THADA/EXOSC6/DDX47/EIF4A3/NOL8/RIOK1/NSUN2/HENMT1/NOP14/ELAC1/PPA1/FBL/RPF2/KHSRP/GRSF1/LARS2/TDRD12/RSL1D1/FARSA/PA2G4/IARS2/DDX56/NSUN6/BMS1/NHP2/SIRT7/TRMT1L/RPS9/RIOK3/UTP3/NSUN5/TRMT61A/BYSL/METTL6/MRPL1/MYBL1/UTP20/DPH3/WARS2/WBP1…
BP	GO:0033238	regulation of cellular amine metabolic process	67	0.738517	1.98307	1.29e-05	0.00128386	0.00118078	966	tags=45%, list=8%, signal=42%	INS/PSMC4/PSMD14/PSMD2/PSMC3/PSMD6/PSMD1/PSMC5/PSMC2/PSMC1/PSMA3/PSMD7/PSMD13/PSMD8/PSMD4/PSMD3/ATP2B4/PSMB5/PSMA5/PSMC6/PSMB4/PSMD12/PSMB2/NR4A2/PSMD11/PSMB1/PSMA2/PSMA1/ODC1/PSMA6
BP	GO:0002478	antigen processing and presentation of exogenous peptide antigen	141	0.615152	1.82276	1.41e-05	0.00138445	0.0012733	1350	tags=31%, list=11%, signal=28%	PSMC4/SEC24D/PSMD14/DYNC1H1/PSMD2/PSMC3/PSMD6/PSMD1/PSMC5/PSMC2/PSMC1/PSMA3/PSMD7/PSMD13/PSMD8/PSMD4/CALR/PSMD3/PSMB5/CANX/PSMA5/SEC13/PSMC6/PSMB4/PSMD12/PSMB2/PSMD11/MFSD6/KIF3A/PSMB1/PSMA2/SEC22B/SEC31A/DCTN1/PSMA1/PSMA6/CTSE/IKBKB/CLTC/PSMA4/ACTR1B/PSMB3/KIF5A/PSMB7
BP	GO:0044272	sulfur compound biosynthetic process	149	-0.713022	-1.83258	1.5e-05	0.00145447	0.0013377	907	tags=16%, list=7%, signal=15%	GGT1/CBR4/FASN/CHPF2/B4GALT5/VCAN/ANGPT1/GSTZ1/NDST4/PPT1/GSTA4/PRELP/ACLY/CDO1/ST3GAL4/GGT5/BHMT/ACSL5/ACSS2/CSPG5/DCN/LUM/SCD5/CSAD
CC	GO:0030684	preribosome	71	0.727406	1.96585	1.65e-05	0.00157883	0.00145208	1972	tags=39%, list=16%, signal=34%	MDN1/EIF6/WDR36/PDCD11/WDR3/HEATR1/RIOK1/NOP14/FBL/RSL1D1/BMS1/RIOK3/UTP3/BYSL/NIP7/LTV1/UTP20/PRKDC/RRS1/PPAN/EMG1/RRP36/WDR74/NOL10/KRR1/UTP18/ZNF622/KRI1
MF	GO:0015370	solute:sodium symporter activity	55	-0.843951	-1.90092	1.7e-05	0.00160472	0.00147589	338	tags=15%, list=3%, signal=14%	SLC5A2/SLC6A6/SLC13A5/SLC10A1/SLC6A7/SLC10A2/SLC5A9/SLC13A4
BP	GO:0045047	protein targeting to ER	102	0.656114	1.86281	1.72e-05	0.00161081	0.00148149	1184	tags=20%, list=9%, signal=18%	SGTA/SEC61B/SRPRA/SEC61G/SRPRB/RPL5/HSPA5/SRP9/SSR3/SEC61A1/EDEM1/SRP19/SRP72/TRAM1/SRP14/SRP54/SPCS2/SPCS1/SEC62/RPS5
BP	GO:0006521	regulation of cellular amino acid metabolic process	55	0.770119	2.00951	1.85e-05	0.00170125	0.00156467	966	tags=53%, list=8%, signal=49%	INS/PSMC4/PSMD14/PSMD2/PSMC3/PSMD6/PSMD1/PSMC5/PSMC2/PSMC1/PSMA3/PSMD7/PSMD13/PSMD8/PSMD4/PSMD3/ATP2B4/PSMB5/PSMA5/PSMC6/PSMB4/PSMD12/PSMB2/PSMD11/PSMB1/PSMA2/PSMA1/ODC1/PSMA6
BP	GO:0006790	sulfur compound metabolic process	284	-0.631817	-1.72205	1.87e-05	0.00170125	0.00156467	1180	tags=15%, list=9%, signal=14%	ACOT8/GADL1/GSTT2B/NCAN/HACD2/DPEP1/GDAP1/BPNT1/GNS/GGT1/CBR4/HSCB/FASN/NOX4/HSD17B4/CHPF2/NFU1/B4GALT5/VCAN/CPS1/ANGPT1/IDS/NDNF/GSTZ1/NDST4/PPT1/GSTA4/PRELP/ACLY/CDO1/ST3GAL4/DGAT2/GGT5/BHMT/GLB1/ACSL5/ACSS2/CSPG5/DCN/LUM/SCD5/CSAD
BP	GO:0051168	nuclear export	173	0.577195	1.75098	2.2e-05	0.00197714	0.0018184	2257	tags=28%, list=18%, signal=24%	DESI1/CCHCR1/NUP205/IL1B/TSC1/NUP35/UHMK1/XPO4/CALR/EIF6/FYTTD1/HSPA9/SEC13/NUP210/NUP188/DHX9/NUP107/TPR/YTHDC1/ABCE1/EIF4A3/NUP98/NSUN2/SDAD1/GLE1/STRADB/SMG1/UPF1/NUP155/NUP153/CSE1L/SIRT7/SRSF4/NUTF2/LTV1/RRS1/RANGAP1/NCBP2/ANKLE1/HNRNPA1/POLR2D/XPOT/CPSF1/TXN/SP100/NUP160/SSB/NUP85/NUP88
CC	GO:0005759	mitochondrial matrix	396	0.466812	1.5237	2.24e-05	0.00199439	0.00183428	1778	tags=21%, list=14%, signal=19%	OTC/HSPD1/ABAT/PMPCB/ARG2/MCAT/LRPPRC/MRPL9/FLAD1/TBRG4/HSPA9/HADHA/DAP3/MRPS22/PITRM1/TXNRD2/ACAA2/OGDH/MRPL4/LRRK2/SUCLA2/HIBADH/HYKK/GFM1/SDHAF1/ABCE1/TUFM/GFM2/MRPS18C/MIPEP/MMAA/C1QBP/TXN2/CLPP/CS/IDH3A/TRAP1/MRPL24/PDE2A/MRPS12/MRPL57/ACSS3/MRPL41/SSBP1/MRPL46/MRPL22/MRPS27/MRPL53/HADHB/GRSF1/PYCR1/LARS2/PDSS2/MRPL40/FASTK/REXO2/BCO2/IARS2/GCDH/MRPL32/MRPS18B/MRPS26/MRPS21/DHX30/MRPL37/DBT/…
CC	GO:0000313	organellar ribosome	79	0.698515	1.92416	2.45e-05	0.00212363	0.00195314	2971	tags=56%, list=23%, signal=43%	MRPL9/DAP3/MRPS22/MRPL4/MRPS18C/MRPL24/MRPS12/MRPL57/MRPL41/MRPL46/MRPL22/MRPS27/MRPL53/MRPL40/MRPL32/MRPS18B/MRPS26/MRPS21/MRPL37/MRPL54/MRPS31/MRPL34/MRPS5/MRPL43/MRPS35/MRPS2/MRPS34/MRPL15/MRPL38/MRPS16/MRPS33/MRPL51/MRPS7/MRPS6/MRPS36/MRPS10/MALSU1/MRPL12/MRPL17/NDUFAB1/MRPL14/MRPS30/CHCHD1/MRPS24
CC	GO:0005761	mitochondrial ribosome	79	0.698515	1.92416	2.45e-05	0.00212363	0.00195314	2971	tags=56%, list=23%, signal=43%	MRPL9/DAP3/MRPS22/MRPL4/MRPS18C/MRPL24/MRPS12/MRPL57/MRPL41/MRPL46/MRPL22/MRPS27/MRPL53/MRPL40/MRPL32/MRPS18B/MRPS26/MRPS21/MRPL37/MRPL54/MRPS31/MRPL34/MRPS5/MRPL43/MRPS35/MRPS2/MRPS34/MRPL15/MRPL38/MRPS16/MRPS33/MRPL51/MRPS7/MRPS6/MRPS36/MRPS10/MALSU1/MRPL12/MRPL17/NDUFAB1/MRPL14/MRPS30/CHCHD1/MRPS24
BP	GO:0015931	nucleobase-containing compound transport	205	0.55015	1.69346	2.56e-05	0.00219817	0.00202169	2257	tags=30%, list=18%, signal=25%	NUP205/IGF2BP1/SLC35B1/LRPPRC/GJA1/TSC1/NUP35/EIF6/SLC35B4/FYTTD1/SLC33A1/ABCC4/SEC13/SLC35A2/NUP210/NUP188/DHX9/ABCD1/NUP107/TPR/YTHDC1/ABCE1/SLC29A2/EIF4A3/TOMM20/NUP98/NSUN2/SDAD1/CR1/SLC35E3/GLE1/SLC25A24/KHSRP/SMG1/UPF1/NUP155/NUP153/SRSF4/HNRNPU/AHCTF1/SLC35A4/SLC35C2/HSF1/NUTF2/LTV1/IGF2BP2/RRS1/NCBP2/IGF2BP3/SLC35D1/HNRNPA1/POLR2D/XPOT/CPSF1/ZC3H3/TNKS/NUP160/G3BP2/SSB/NUP85/NUP88
BP	GO:0006403	RNA localization	198	0.551352	1.69338	3.03e-05	0.00256841	0.0023622	2750	tags=37%, list=22%, signal=29%	NUP205/IGF2BP1/LRPPRC/TSC1/NUP35/EIF6/FYTTD1/SEC13/CCT3/CCT6A/NUP210/NUP188/CCT4/DHX9/NUP107/TPR/YTHDC1/ABCE1/EIF4A3/TOMM20/NUP98/NSUN2/SDAD1/CCT8/FBL/ATR/GLE1/KHSRP/SMG1/UPF1/NUP155/NUP153/NHP2/SRSF4/HNRNPU/CCT7/AHCTF1/HSF1/NUTF2/LTV1/IGF2BP2/RUVBL2/CCT5/RRS1/NCBP2/IGF2BP3/HNRNPA1/POLR2D/XPOT/ZNF385A/CPSF1/ZC3H3/TNKS/NUP160/G3BP2/SSB/NUP85/NUP88/EIF4E/SHQ1/PNPT1/NUP133/U2AF1/TCP1/RAN/NUP93/DHX36…
BP	GO:0006890	retrograde vesicle-mediated transport, Golgi to endoplasmic reticulum	76	0.705098	1.92801	3.81e-05	0.00316028	0.00290656	1713	tags=50%, list=13%, signal=44%	ATP9B/NBAS/SURF4/TMED10/COPZ2/ARF5/COPG2/COG4/ARFGAP1/KIF3A/SCFD1/ERGIC1/SEC22B/RAB6A/TMED7/ERGIC3/COPA/TMED2/ARF4/COPE/KDELR2/COPZ1/ERGIC2/NSF/KIF5A/ARCN1/SCYL1/TMED9/RAB1B/ARFGAP2/GBF1/COG7/RINT1/COPB1/COPB2/RAB1A/LMAN2/UVRAG
BP	GO:0060218	hematopoietic stem cell differentiation	76	0.704761	1.92709	3.81e-05	0.00316028	0.00290656	653	tags=38%, list=5%, signal=36%	PSMC4/PSMD14/PSMD2/PSMC3/PSMD6/PSMD1/PSMC5/PSMC2/PSMC1/PSMA3/UFL1/PSMD7/PSMD13/PSMD8/PSMD4/PSMD3/HSPA9/PSMB5/KMT2A/SETD1A/PSMA5/PSMC6/PSMB4/PSMD12/SRF/PSMB2/PSMD11/PSMB1/PSMA2
BP	GO:0036498	IRE1-mediated unfolded protein response	53	0.7632	1.97139	4.08e-05	0.00334597	0.00307734	837	tags=38%, list=7%, signal=35%	DNAJB11/HYOU1/PDIA6/SYVN1/YIF1A/PREB/SRPRA/UFL1/SSR1/SRPRB/HSPA5/ARFGAP1/FKBP14/MYDGF/GFPT1/EDEM1/DNAJC3/SEC31A/PDIA5/DCTN1
BP	GO:1901990	regulation of mitotic cell cycle phase transition	349	0.474056	1.54973	4.42e-05	0.00358288	0.00329523	1874	tags=25%, list=15%, signal=22%	PSMC4/MAPRE1/PSMD14/DYNC1H1/PSMD2/LSM10/PSMC3/PSMD6/PSMD1/APC/PSMC5/PSMC2/HSP90AA1/PSMC1/PSMA3/PSMD7/PSMD13/PSMD8/PSMD4/PSMD3/ANAPC4/RBL2/PSMB5/PSMA5/PSMC6/PSMB4/PSMD12/PSMB2/TUBB4B/CEP192/PSMD11/EIF4G1/TUBA1A/TRIP13/CEP164/PSMB1/PSMA2/TPR/AKAP9/TUBA4A/DCTN1/CDK5RAP3/PSMA1/PRMT1/PLK4/RCC2/CEP131/PSMA6/GPNMB/SPDL1/PSMA4/MDM4/CEP250/ODF2/AVEN/PPP2R1A/CEP152/CEP76/PHB2/PSMB3/INO80/PSMG2/CDC6/PSMB7/C…
BP	GO:1902036	regulation of hematopoietic stem cell differentiation	67	0.719598	1.93227	4.62e-05	0.00370436	0.00340696	653	tags=40%, list=5%, signal=38%	PSMC4/PSMD14/PSMD2/PSMC3/PSMD6/PSMD1/PSMC5/PSMC2/PSMC1/PSMA3/PSMD7/PSMD13/PSMD8/PSMD4/PSMD3/HSPA9/PSMB5/KMT2A/SETD1A/PSMA5/PSMC6/PSMB4/PSMD12/PSMB2/PSMD11/PSMB1/PSMA2
BP	GO:0071347	cellular response to interleukin-1	126	0.629791	1.83402	4.73e-05	0.00375136	0.00345018	1409	tags=33%, list=11%, signal=30%	PSMC4/PSMD14/PSMD2/IL1B/PSMC3/PSMD6/PSMD1/PSMC5/PSMC2/PSMC1/PSMA3/PSMD7/PSMD13/PSMD8/PSMD4/PSMD3/NFKB1/PSMB5/PSMA5/PTGIS/PSMC6/PSMB4/PSMD12/PSMB2/PSMD11/IRAK1/IRAK4/PSMB1/PSMA2/TAB1/PSMA1/PSMA6/IKBKB/NOD1/PSMA4/PELI2/IL1RAP/UPF1/PSMB3/PSMB7/CUL1/RBX1
BP	GO:0071166	ribonucleoprotein complex localization	114	0.627463	1.80804	4.92e-05	0.0038669	0.00355645	3435	tags=52%, list=27%, signal=38%	NUP205/TSC1/NUP35/EIF6/FYTTD1/SEC13/NUP210/NUP188/NUP107/TPR/YTHDC1/ABCE1/EIF4A3/NUP98/NSUN2/PRPF31/SDAD1/GLE1/SMG1/UPF1/NUP155/NUP153/SRSF4/LTV1/RRS1/NCBP2/POLR2D/XPOT/CPSF1/NUP160/SSB/NUP85/NUP88/EIF4E/NUP133/U2AF1/RAN/NUP93/NUP54/SRSF7/SRSF3/THOC6/UPF2/SRRM1/AAAS/THOC3/SRSF11/DDX39B/CPSF2/RNPS1/AKAP8L/NOP9/IWS1/SRSF6/DHX38/RAE1/SRSF2/CHTOP/MAGOHB
BP	GO:0002223	stimulatory C-type lectin receptor signaling pathway	86	0.664493	1.86213	5.02e-05	0.00390249	0.00358918	1404	tags=41%, list=11%, signal=36%	PSMC4/PSMD14/PSMD2/RELB/PSMC3/PSMD6/PSMD1/PSMC5/PSMC2/PSMC1/PSMA3/PSMD7/PSMD13/PSMD8/PSMD4/PSMD3/NFKB1/PSMB5/PSMA5/PSMC6/PSMB4/PSMD12/PSMB2/PSMD11/PSMB1/PSMA2/TAB1/PSMA1/PSMA6/IKBKB/PSMA4/PSMB3/PSMB7/MUC6/CUL1
CC	GO:0062023	collagen-containing extracellular matrix	316	-0.614868	-1.6864	5.18e-05	0.00398131	0.00366167	1232	tags=24%, list=10%, signal=23%	CTSS/CTSH/FN1/CTSD/SEMA7A/AGT/S100A6/C1QC/SCARA3/USH2A/COL20A1/CTSC/PTN/MMP23B/APOA1/C1QA/F9/ELN/P3H2/ITIH2/NID1/CXCL12/WNT5B/MATN4/VWA2/COL6A6/CDH2/VCAN/SPARC/OTOL1/ITIH5/ANGPT1/SFRP2/PSAP/SERPINA1/ANGPT2/TGFBI/A2M/MST1/APOE/GDF10/PRELP/NID2/COL6A1/MMRN2/MFAP4/COL1A1/CRELD1/SERPING1/PLG/SERPINH1/LAD1/COL11A1/AEBP1/SMOC1/COL1A2/VWA1/ANGPTL7/PZP/AMBP/MFAP2/COCH/PODN/WNT5A/AHSG/CTHRC1/COL6A2/HMCN2/…
BP	GO:0019882	antigen processing and presentation	179	0.555197	1.69721	5.6e-05	0.00426375	0.00392144	1104	tags=26%, list=9%, signal=24%	PSMC4/SEC24D/PSMD14/DYNC1H1/PSMD2/RELB/PSMC3/PSMD6/PSMD1/PSMC5/PSMC2/PSMC1/PSMA3/PSMD7/PSMD13/PSMD8/PSMD4/CALR/PSMD3/PSMB5/CANX/PSMA5/SEC13/PSMC6/PSMB4/PSMD12/PSMB2/RAB34/PSMD11/THBS1/MFSD6/KIF3A/PSMB1/PSMA2/SEC22B/RAB6A/SEC31A/DCTN1/PSMA1/PSMA6/CTSE/IKBKB/CLTC/NOD1/CCR7/PSMA4
BP	GO:0006414	translational elongation	120	0.631792	1.83356	5.72e-05	0.00430472	0.00395912	2971	tags=51%, list=23%, signal=39%	MRPL9/DAP3/MRPS22/MRPL4/LTN1/SRP9/GFM1/TUFM/MRPS18C/EIF4A3/MRPL24/MRPS12/MRPL57/MRPL41/MRPL46/MRPL22/MRPS27/MRPL53/EEF1G/CPEB2/MRPL40/AURKAIP1/MRPL32/MRPS18B/MRPS26/MRPS21/MRPL37/MRPL54/MRPS25/MRPL1/MRPS31/MRPL34/DPH3/MRPS5/MRPL43/USP16/MRPS35/DPH6/MRPS2/MRPS34/MRPL15/MRPL38/DPH7/MRPS16/MRPS33/GADD45GIP1/NEMF/MRPS23/MRPL51/MRPS7/DPH5/MRPS6/MRPS36/MRPS10/MRPL12/MRPL17/EEF1D/MRPL14/MRPS30/CHCHD1/MR…
BP	GO:0006486	protein glycosylation	187	0.541605	1.64808	5.91e-05	0.00436391	0.00401356	1385	tags=27%, list=11%, signal=24%	NUDT14/B3GAT2/NAGPA/SDF2L1/DOLPP1/MOGS/POMT1/STT3B/DPY19L3/UGGT2/MAGT1/UGGT1/DPM3/TRIP11/GALNT9/PLOD3/MAN1B1/TRAK2/EOGT/OST4/GFPT1/ALG12/TUSC3/STT3A/DPM1/LMAN1/KRTCAP2/ALG5/DDOST/RPN2/ALG6/NUS1/B3GNT3/ALG3/MGAT4A/PGM3/B3GNT7/ALG1/PMM2/GALNT10/TMEM258/TMEM165/DPAGT1/GALNT5/EXTL2/DAD1/OSTC/GOLGA2/FUT11/MUC6
BP	GO:0043413	macromolecule glycosylation	187	0.541605	1.64808	5.91e-05	0.00436391	0.00401356	1385	tags=27%, list=11%, signal=24%	NUDT14/B3GAT2/NAGPA/SDF2L1/DOLPP1/MOGS/POMT1/STT3B/DPY19L3/UGGT2/MAGT1/UGGT1/DPM3/TRIP11/GALNT9/PLOD3/MAN1B1/TRAK2/EOGT/OST4/GFPT1/ALG12/TUSC3/STT3A/DPM1/LMAN1/KRTCAP2/ALG5/DDOST/RPN2/ALG6/NUS1/B3GNT3/ALG3/MGAT4A/PGM3/B3GNT7/ALG1/PMM2/GALNT10/TMEM258/TMEM165/DPAGT1/GALNT5/EXTL2/DAD1/OSTC/GOLGA2/FUT11/MUC6
CC	GO:0008540	proteasome regulatory particle, base subcomplex	12	0.946406	1.76535	6.99e-05	0.00510836	0.00469824	410	tags=75%, list=3%, signal=73%	PSMC4/PSMD2/PSMC3/PSMD1/PSMC5/PSMC2/PSMC1/PSMD4/PSMC6
BP	GO:1901987	regulation of cell cycle phase transition	377	0.46271	1.50358	7.1e-05	0.00513689	0.00472448	2140	tags=28%, list=17%, signal=24%	PSMC4/MAPRE1/PSMD14/DYNC1H1/PSMD2/LSM10/PSMC3/PSMD6/PSMD1/APC/PSMC5/PSMC2/HSP90AA1/PSMC1/PSMA3/PSMD7/PSMD13/PSMD8/PSMD4/PSMD3/ANAPC4/RBL2/ATP2B4/PSMB5/PSMA5/PSMC6/PSMB4/SUSD2/PSMD12/PSMB2/TUBB4B/CEP192/PSMD11/EIF4G1/TUBA1A/FBXW7/TRIP13/CEP164/PSMB1/PSMA2/TPR/AKAP9/TUBA4A/DCTN1/CDK5RAP3/PSMA1/PRMT1/PLK4/RCC2/CEP131/PSMA6/GPNMB/SPDL1/PSMA4/MDM4/CEP250/ODF2/AVEN/PPP2R1A/CEP152/CEP76/PHB2/PSMB3/INO80…
CC	GO:0044322	endoplasmic reticulum quality control compartment	24	0.8622	1.92117	7.22e-05	0.00516304	0.00474853	857	tags=46%, list=7%, signal=43%	DERL2/SEL1L/DERL1/SYVN1/SEC61B/UGGT2/UGGT1/CALR/MAN1B1/EDEM1/ERLEC1
BP	GO:0006613	cotranslational protein targeting to membrane	94	0.654034	1.85924	7.27e-05	0.00516304	0.00474853	4088	tags=72%, list=32%, signal=49%	SEC61B/SRPRA/SSR1/RPL5/SRP9/SSR3/SEC61A1/SRP19/SRP72/SSR2/TRAM1/SRP14/SRP54/SEC62/RPS5/RPS9/RPS13/ZFAND2B/SIL1/SRP68/RPL10/RPS21/RPL35/RPL13/RPS6/RPS23/RPS3/UBA52/RPL11/RPSA/RPS19/RPL14/RPS18/RPS26/RPS28/RPL28/RPS10/RPS7/RPL23A/RPL21/RPS16/RPS27A/RPL37/RPL15/RPL36/RPL27A/RPL13A/RPL24/RPL35A/RPL31/RPL4/RPL8/RPS29/RPL29/RPLP0/RPL26/RPL36A/RPLP1/RPS8/RPS12/RPS11/RPL30/RPS17/RPS20/RPS15/RPL7A/RPS27/R…
MF	GO:0043021	ribonucleoprotein complex binding	109	0.636945	1.82099	7.44e-05	0.00522653	0.00480692	1965	tags=36%, list=15%, signal=31%	DERL2/DERL1/GCN1/SRPRA/UHMK1/EIF6/HSPA5/EIF4H/LTN1/SRP9/SEC61A1/DHX9/SRP19/ABCE1/SND1/SRP72/TACO1/LARP1/EIF4A3/RPN2/C1QBP/SRP54/PRPF31/EIF3C/PRMT7/SPCS1/MRPS27/MTIF2/CPEB2/DHX33/EIF2A/HNRNPU/MDM2/SNRPA/SNRPB2/EIF4B/DHX29/PPIH/SRP68
MF	GO:0015294	solute:cation symporter activity	79	-0.766037	-1.81835	7.53e-05	0.00522653	0.00480692	338	tags=13%, list=3%, signal=12%	SLC5A2/SLC6A6/SLC13A5/SLC15A2/SLC10A1/SLC6A7/SLC10A2/SLC15A1/SLC5A9/SLC13A4
BP	GO:0050657	nucleic acid transport	162	0.559764	1.6967	7.65e-05	0.00522653	0.00480692	2750	tags=36%, list=22%, signal=29%	NUP205/IGF2BP1/LRPPRC/TSC1/NUP35/EIF6/FYTTD1/SEC13/NUP210/NUP188/DHX9/NUP107/TPR/YTHDC1/ABCE1/EIF4A3/TOMM20/NUP98/NSUN2/SDAD1/GLE1/KHSRP/SMG1/UPF1/NUP155/NUP153/SRSF4/HNRNPU/AHCTF1/HSF1/NUTF2/LTV1/IGF2BP2/RRS1/NCBP2/IGF2BP3/HNRNPA1/POLR2D/XPOT/CPSF1/ZC3H3/TNKS/NUP160/G3BP2/SSB/NUP85/NUP88/EIF4E/PNPT1/NUP133/U2AF1/RAN/NUP93/NUP54/SRSF7/SRSF3/THOC6/NRDE2/UPF2
BP	GO:0050658	RNA transport	162	0.559764	1.6967	7.65e-05	0.00522653	0.00480692	2750	tags=36%, list=22%, signal=29%	NUP205/IGF2BP1/LRPPRC/TSC1/NUP35/EIF6/FYTTD1/SEC13/NUP210/NUP188/DHX9/NUP107/TPR/YTHDC1/ABCE1/EIF4A3/TOMM20/NUP98/NSUN2/SDAD1/GLE1/KHSRP/SMG1/UPF1/NUP155/NUP153/SRSF4/HNRNPU/AHCTF1/HSF1/NUTF2/LTV1/IGF2BP2/RRS1/NCBP2/IGF2BP3/HNRNPA1/POLR2D/XPOT/CPSF1/ZC3H3/TNKS/NUP160/G3BP2/SSB/NUP85/NUP88/EIF4E/PNPT1/NUP133/U2AF1/RAN/NUP93/NUP54/SRSF7/SRSF3/THOC6/NRDE2/UPF2
BP	GO:0071426	ribonucleoprotein complex export from nucleus	113	0.625254	1.79909	7.86e-05	0.00532167	0.00489442	3435	tags=51%, list=27%, signal=38%	NUP205/TSC1/NUP35/EIF6/FYTTD1/SEC13/NUP210/NUP188/NUP107/TPR/YTHDC1/ABCE1/EIF4A3/NUP98/NSUN2/SDAD1/GLE1/SMG1/UPF1/NUP155/NUP153/SRSF4/LTV1/RRS1/NCBP2/POLR2D/XPOT/CPSF1/NUP160/SSB/NUP85/NUP88/EIF4E/NUP133/U2AF1/RAN/NUP93/NUP54/SRSF7/SRSF3/THOC6/UPF2/SRRM1/AAAS/THOC3/SRSF11/DDX39B/CPSF2/RNPS1/AKAP8L/NOP9/IWS1/SRSF6/DHX38/RAE1/SRSF2/CHTOP/MAGOHB
BP	GO:0002218	activation of innate immune response	105	0.645393	1.83928	8.01e-05	0.00537262	0.00494128	986	tags=30%, list=8%, signal=27%	PSMC4/PSMD14/PSMD2/RELB/PSMC3/PSMD6/PSMD1/PSMC5/PSMC2/HSP90AA1/PSMC1/PSMA3/PSMD7/PSMD13/PSMD8/PSMD4/PSMD3/NFKB1/PSMB5/PSMA5/PSMC6/PSMB4/PSMD12/PSMB2/PSMD11/PSMB1/PSMA2/TAB1/PSMA1/PSMA6/IKBKB
BP	GO:0002220	innate immune response activating cell surface receptor signaling pathway	87	0.664295	1.87075	8.62e-05	0.00573019	0.00527014	1404	tags=40%, list=11%, signal=36%	PSMC4/PSMD14/PSMD2/RELB/PSMC3/PSMD6/PSMD1/PSMC5/PSMC2/PSMC1/PSMA3/PSMD7/PSMD13/PSMD8/PSMD4/PSMD3/NFKB1/PSMB5/PSMA5/PSMC6/PSMB4/PSMD12/PSMB2/PSMD11/PSMB1/PSMA2/TAB1/PSMA1/PSMA6/IKBKB/PSMA4/PSMB3/PSMB7/MUC6/CUL1
BP	GO:0051236	establishment of RNA localization	165	0.56159	1.69938	9.08e-05	0.00598338	0.00550301	2750	tags=36%, list=22%, signal=29%	NUP205/IGF2BP1/LRPPRC/TSC1/NUP35/EIF6/FYTTD1/SEC13/NUP210/NUP188/DHX9/NUP107/TPR/YTHDC1/ABCE1/EIF4A3/TOMM20/NUP98/NSUN2/SDAD1/ATR/GLE1/KHSRP/SMG1/UPF1/NUP155/NUP153/SRSF4/HNRNPU/AHCTF1/HSF1/NUTF2/LTV1/IGF2BP2/RRS1/NCBP2/IGF2BP3/HNRNPA1/POLR2D/XPOT/CPSF1/ZC3H3/TNKS/NUP160/G3BP2/SSB/NUP85/NUP88/EIF4E/PNPT1/NUP133/U2AF1/RAN/NUP93/NUP54/SRSF7/SRSF3/THOC6/NRDE2/UPF2
BP	GO:0070085	glycosylation	198	0.536321	1.64722	9.22e-05	0.0060206	0.00553724	1385	tags=26%, list=11%, signal=23%	NUDT14/B3GAT2/NAGPA/SDF2L1/DOLPP1/MOGS/POMT1/STT3B/DPY19L3/UGGT2/MAGT1/UGGT1/DPM3/TRIP11/GALNT9/PLOD3/MAN1B1/TRAK2/EOGT/OST4/GFPT1/ALG12/TUSC3/STT3A/DPM1/LMAN1/KRTCAP2/ALG5/DDOST/RPN2/ALG6/NUS1/B3GNT3/ALG3/MGAT4A/PIGB/PGM3/B3GNT7/ALG1/PMM2/GALNT10/TMEM258/TMEM165/DPAGT1/GALNT5/EXTL2/DAD1/OSTC/GOLGA2/FUT11/MUC6
CC	GO:0030120	vesicle coat	44	0.773166	1.93396	9.49e-05	0.00614728	0.00565375	1833	tags=59%, list=14%, signal=51%	SEC24D/CLTB/PDCD6/EPN1/COPZ2/COPG2/SEC13/AP1G2/TMED7/SEC31A/COPA/COPE/COPZ1/CLTC/CLINT1/SYNRG/ARCN1/SCYL1/SEC23B/PEF1/COPB1/COPB2/AP2A1/AP1G1/SEC24A/AP2A2
BP	GO:0071824	protein-DNA complex subunit organization	173	0.550762	1.67079	9.68e-05	0.00621607	0.00571701	1504	tags=19%, list=12%, signal=17%	PSMC4/TAF1C/PSMC3/PSMC5/PSMC2/CENPO/CHD5/CCNH/SET/ZNHIT1/PSMC6/ORC3/RAD23B/GRWD1/RRN3/ANP32E/ESR1/CENPP/HNF1B/IPO4/TAF7/MNAT1/BRF1/LIN54/RSF1/SMARCA4/INO80/DAXX/RBX1/RBBP4/RAD51C/BPTF/PSME4
BP	GO:0008380	RNA splicing	383	0.458729	1.49254	9.8e-05	0.00623763	0.00573685	2091	tags=20%, list=16%, signal=17%	TSEN15/KHDRBS3/AFF2/LSM10/WDR83/LGALS3/STRAP/PRPF8/PTBP2/RAVER2/HABP4/SNRNP200/SNRPN/RTCB/DHX9/MBNL2/YTHDC1/RBM41/CLNS1A/ELAVL1/RBM4/NOVA1/DDX47/EIF4A3/RBM15/C1QBP/HNRNPD/NUP98/PRPF31/GEMIN6/PRMT7/SNRNP48/SCAF1/HNRNPH1/SF3B3/KHSRP/PPP2R1A/GRSF1/PUF60/ERN1/NCL/PPIL3/RBM12B/FASTK/USP4/TIA1/WDR77/RBM4B/SMN1/SF3B2/EFTUD2/SRSF4/PPIL1/HNRNPU/U2AF1L5/COIL/IK/PRPF19/SNRPG/SF3B1/WBP11/PRPF38A/RPS13/SNRPA/…
BP	GO:0002758	innate immune response-activating signal transduction	88	0.656121	1.84974	0.000104704	0.00660528	0.00607498	1404	tags=40%, list=11%, signal=36%	PSMC4/PSMD14/PSMD2/RELB/PSMC3/PSMD6/PSMD1/PSMC5/PSMC2/PSMC1/PSMA3/PSMD7/PSMD13/PSMD8/PSMD4/PSMD3/NFKB1/PSMB5/PSMA5/PSMC6/PSMB4/PSMD12/PSMB2/PSMD11/PSMB1/PSMA2/TAB1/PSMA1/PSMA6/IKBKB/PSMA4/PSMB3/PSMB7/MUC6/CUL1
BP	GO:1901988	negative regulation of cell cycle phase transition	206	0.539075	1.66129	0.000109989	0.00682209	0.00627439	1633	tags=27%, list=13%, signal=24%	PSMC4/PSMD14/PSMD2/PSMC3/PSMD6/PSMD1/APC/PSMC5/PSMC2/PSMC1/PSMA3/PSMD7/PSMD13/PSMD8/PSMD4/PSMD3/RBL2/PSMB5/PSMA5/PSMC6/PSMB4/SUSD2/PSMD12/PSMB2/PSMD11/TRIP13/PSMB1/PSMA2/TPR/CDK5RAP3/PSMA1/PRMT1/PSMA6/GPNMB/SPDL1/PSMA4/MDM4/AVEN/PSMB3/PSMG2/CDC6/PSMB7/CNOT11/CDK5RAP2/CUL1/RBX1/CDK4/PSME4/RINT1/IK/CARM1/PSMD5/MDM2/TAOK3/PRMT2
BP	GO:1901991	negative regulation of mitotic cell cycle phase transition	197	0.541259	1.66044	0.000109989	0.00682209	0.00627439	1633	tags=27%, list=13%, signal=24%	PSMC4/PSMD14/PSMD2/PSMC3/PSMD6/PSMD1/APC/PSMC5/PSMC2/PSMC1/PSMA3/PSMD7/PSMD13/PSMD8/PSMD4/PSMD3/RBL2/PSMB5/PSMA5/PSMC6/PSMB4/PSMD12/PSMB2/PSMD11/TRIP13/PSMB1/PSMA2/TPR/CDK5RAP3/PSMA1/PRMT1/PSMA6/GPNMB/SPDL1/PSMA4/MDM4/AVEN/PSMB3/PSMG2/CDC6/PSMB7/CNOT11/CDK5RAP2/CUL1/RBX1/CDK4/PSME4/RINT1/IK/CARM1/PSMD5/MDM2/TAOK3/PRMT2
BP	GO:0006405	RNA export from nucleus	120	0.620378	1.80044	0.000111014	0.00682826	0.00628006	2750	tags=38%, list=22%, signal=30%	NUP205/TSC1/NUP35/EIF6/FYTTD1/SEC13/NUP210/NUP188/DHX9/NUP107/TPR/YTHDC1/ABCE1/EIF4A3/NUP98/NSUN2/SDAD1/GLE1/SMG1/UPF1/NUP155/NUP153/SRSF4/LTV1/RRS1/NCBP2/HNRNPA1/POLR2D/XPOT/CPSF1/NUP160/SSB/NUP85/NUP88/EIF4E/NUP133/U2AF1/RAN/NUP93/NUP54/SRSF7/SRSF3/THOC6/NRDE2/UPF2
BP	GO:0006614	SRP-dependent cotranslational protein targeting to membrane	89	0.655304	1.83826	0.000116029	0.00707775	0.00650952	4145	tags=74%, list=33%, signal=50%	SEC61B/SRPRA/RPL5/SRP9/SSR3/SEC61A1/SRP19/SRP72/TRAM1/SRP14/SRP54/RPS5/RPS9/RPS13/ZFAND2B/SRP68/RPL10/RPS21/RPL35/RPL13/RPS6/RPS23/RPS3/UBA52/RPL11/RPSA/RPS19/RPL14/RPS18/RPS26/RPS28/RPL28/RPS10/RPS7/RPL23A/RPL21/RPS16/RPS27A/RPL37/RPL15/RPL36/RPL27A/RPL13A/RPL24/RPL35A/RPL31/RPL4/RPL8/RPS29/RPL29/RPLP0/RPL26/RPL36A/RPLP1/RPS8/RPS12/RPS11/RPL30/RPS17/RPS20/RPS15/RPL7A/RPS27/RPS25/RPL23/RPS14
BP	GO:0018196	peptidyl-asparagine modification	28	0.844707	1.93577	0.000124123	0.00750946	0.00690657	842	tags=50%, list=7%, signal=47%	NUDT14/STT3B/UGGT2/MAGT1/UGGT1/DPM3/OST4/TUSC3/STT3A/DPM1/LMAN1/ALG5/DDOST/RPN2
BP	GO:0046700	heterocycle catabolic process	487	0.434858	1.44921	0.000142076	0.00852572	0.00784124	1521	tags=18%, list=12%, signal=16%	PSMC4/PATL2/PSMD14/SKIV2L/PSMD2/XRN1/PSMC3/AGO1/PSMD6/PSMD1/IGF2BP1/UPP1/VIP/PSMC5/PSMC2/NBAS/PSMC1/LRPPRC/PSMA3/PSMD7/PSMD13/PSMD8/PSMD4/PSMD3/ERI2/DICER1/TBRG4/PSMB5/ENTPD4/SET/RPL5/PSMA5/PSMC6/PSMB4/PSMD12/VCP/PSMB2/PSMD11/EIF4G1/DDX6/DHX9/PSMB1/ABCD1/DIS3L/PSMA2/DIS3L2/UGT1A1/NUDT5/VIM/SND1/ELAVL1/EXOSC6/LARP1/AXIN2/EIF4A3/RNASEH2C/PSMA1/HNRNPD/NSUN2/PSMA6/PDE2A/ENTPD7/PABPC4/SLIRP/PSMA4/FAST…
BP	GO:0051028	mRNA transport	126	0.614382	1.78915	0.000148953	0.0088663	0.00815447	3085	tags=43%, list=24%, signal=33%	NUP205/IGF2BP1/LRPPRC/NUP35/FYTTD1/SEC13/NUP210/NUP188/DHX9/NUP107/TPR/YTHDC1/EIF4A3/NUP98/NSUN2/GLE1/KHSRP/SMG1/UPF1/NUP155/NUP153/SRSF4/AHCTF1/HSF1/NUTF2/IGF2BP2/NCBP2/IGF2BP3/HNRNPA1/POLR2D/CPSF1/ZC3H3/TNKS/NUP160/G3BP2/NUP85/NUP88/EIF4E/NUP133/U2AF1/NUP93/NUP54/SRSF7/SRSF3/THOC6/UPF2/SRRM1/AAAS/THOC3/KIF5C/SRSF11/EIF5A2/DDX39B/CPSF2
BP	GO:0070555	response to interleukin-1	143	0.575218	1.71292	0.000154048	0.00909623	0.00836594	1409	tags=31%, list=11%, signal=28%	PSMC4/PSMD14/PSMD2/IL1B/PSMC3/PSMD6/PSMD1/PSMC5/PSMC2/PSMC1/PSMA3/MTHFR/PSMD7/PSMD13/PSMD8/PSMD4/PSMD3/NFKB1/PSMB5/PSMA5/PTGIS/PSMC6/PSMB4/PSMD12/PSMB2/PSMD11/IRAK1/IRAK4/PSMB1/PSMA2/TAB1/PSMA1/PSMA6/IKBKB/NOD1/PSMA4/PELI2/IL1RAP/UPF1/HDAC4/PSMB3/PSMB7/CUL1/RBX1
CC	GO:0031300	intrinsic component of organelle membrane	318	0.474283	1.51884	0.000155386	0.0091024	0.00837162	1233	tags=19%, list=10%, signal=17%	ADCK1/DERL2/DOLPP1/QSOX2/HM13/DERL1/SLC37A1/SYVN1/CPLX3/P2RX2/YIF1A/PREB/SLC35B1/DPM3/CALR/SLC35B4/HSPA9/CANX/ENTPD4/STX12/DNAJC11/HSPA5/PIGG/SLC8B1/SLC35A2/SEC61A1/RAB27B/COA3/ERGIC1/EDEM1/UNC50/COX18/ABCD1/TBL2/PORCN/PTPRN2/IMMT/FURIN/ERGIC3/TRAM1/TMCO1/L2HGDH/ESYT2/SV2A/TOMM20/SLC37A3/MFN2/TRABD2B/TMEM177/PCSK5/EMC4/GHITM/SPCS1/SLC22A17/SEC62/RRBP1/YIF1B/SYNGR1/ERN1/DPAGT1
BP	GO:1901532	regulation of hematopoietic progenitor cell differentiation	82	0.661234	1.82742	0.000165711	0.00957181	0.00880335	653	tags=33%, list=5%, signal=31%	PSMC4/PSMD14/PSMD2/PSMC3/PSMD6/PSMD1/PSMC5/PSMC2/PSMC1/PSMA3/PSMD7/PSMD13/PSMD8/PSMD4/PSMD3/HSPA9/PSMB5/KMT2A/SETD1A/PSMA5/PSMC6/PSMB4/PSMD12/PSMB2/PSMD11/PSMB1/PSMA2
BP	GO:0033209	tumor necrosis factor-mediated signaling pathway	121	0.612221	1.77676	0.000165993	0.00957181	0.00880335	1104	tags=26%, list=9%, signal=24%	PSMC4/PSMD14/PSMD2/PSMC3/PSMD6/PSMD1/PSMC5/PSMC2/PSMC1/PSMA3/PSMD7/PSMD13/PSMD8/PSMD4/PSMD3/EDARADD/CARD14/PSMB5/PSMA5/PSMC6/PSMB4/PSMD12/PSMB2/PSMD11/MADD/PSMB1/PSMA2/PSMA1/PSMA6/IKBKB/TRAF4/PSMA4
BP	GO:0044270	cellular nitrogen compound catabolic process	492	0.425091	1.41545	0.000175871	0.0100628	0.00925496	1521	tags=18%, list=12%, signal=16%	PSMC4/PATL2/PSMD14/SKIV2L/PSMD2/XRN1/PSMC3/AGO1/PSMD6/PSMD1/IGF2BP1/UPP1/VIP/PSMC5/PSMC2/NBAS/PSMC1/LRPPRC/PSMA3/PSMD7/PSMD13/PSMD8/PSMD4/PSMD3/ERI2/DICER1/TBRG4/PSMB5/ENTPD4/SET/RPL5/PSMA5/PSMC6/PSMB4/PSMD12/VCP/PSMB2/PSMD11/EIF4G1/DDX6/DHX9/PSMB1/ABCD1/DIS3L/PSMA2/DIS3L2/UGT1A1/NUDT5/VIM/SND1/ELAVL1/EXOSC6/LARP1/AXIN2/EIF4A3/RNASEH2C/PSMA1/HNRNPD/NSUN2/PSMA6/PDE2A/ENTPD7/PABPC4/SLIRP/PSMA4/FAST…
CC	GO:0015934	large ribosomal subunit	97	0.632245	1.80055	0.000177756	0.0100925	0.00928219	4045	tags=62%, list=32%, signal=43%	MRPL9/RPL5/MRPL4/MRPL24/MRPL57/MRPL41/MRPL46/MRPL22/MRPL53/MRPL40/MRPL32/MRPL37/MRPL54/MRPL1/MRPL34/MRPL43/MRPL15/RPL10/MRPL38/MRPL51/RPL35/RPL13/MALSU1/MRPL12/RPL11/MRPL17/NDUFAB1/MRPL14/MRPS30/RPL14/MRPL13/RPL28/MRPL21/RPL23A/MRPL19/RPL21/RPL37/MTERF4/RPL15/RPL36/RPL27A/RPL13A/RPL24/RPL35A/RPL31/RPL4/RPL8/MRPL47/RPL29/RPLP0/RPL26/RPL36A/MRPL10/RPLP1/MRPL39/MRPL52/MRPL18/RPL30/MRPL28/RPL7A
BP	GO:0038093	Fc receptor signaling pathway	155	0.568477	1.71179	0.000179147	0.0100938	0.00928339	1254	tags=25%, list=10%, signal=23%	PSMC4/PSMD14/PSMD2/PSMC3/PSMD6/PSMD1/PSMC5/PSMC2/HSP90AA1/PSMC1/PSMA3/PSMD7/PSMD13/PSMD8/PSMD4/PSMD3/NFKB1/PSMB5/PSMA5/PSMC6/PSMB4/PSMD12/PSMB2/ITK/PSMD11/PRKCQ/PSMB1/PSMA2/ARPC5/TAB1/PSMA1/PSMA6/IKBKB/NR4A3/PLPP4/PSMA4/PPP3CA/ARPC1A/PSMB3
BP	GO:0018279	protein N-linked glycosylation via asparagine	27	0.844753	1.92491	0.000211541	0.0118287	0.010879	842	tags=52%, list=7%, signal=49%	NUDT14/STT3B/UGGT2/MAGT1/UGGT1/DPM3/OST4/TUSC3/STT3A/DPM1/LMAN1/ALG5/DDOST/RPN2
BP	GO:0030433	ubiquitin-dependent ERAD pathway	66	0.689517	1.85318	0.000221444	0.0122893	0.0113027	763	tags=26%, list=6%, signal=24%	DERL2/SEL1L/DERL1/SGTA/SYVN1/STT3B/SEC61B/HSP90B1/MAN1B1/DNAJC10/PSMC6/VCP/HSPA5/NPLOC4/EDEM1/RNF121/USP14
MF	GO:0015293	symporter activity	112	-0.700325	-1.71856	0.000237623	0.0130888	0.0120379	338	tags=12%, list=3%, signal=11%	SLC5A2/SLC6A6/SLC6A19/SLC13A5/SLC15A2/SLC10A1/SLC6A7/SLC10A2/SLC15A1/SLC6A18/SLC16A12/SLC5A9/SLC13A4
MF	GO:0015291	secondary active transmembrane transporter activity	181	-0.649834	-1.70642	0.000242739	0.0132715	0.012206	362	tags=10%, list=3%, signal=10%	SLCO2A1/SLC5A2/SLC37A4/SLC25A30/SLC6A6/SLC6A19/SLC13A5/SLC15A2/SLC10A1/SLC6A7/SLC10A2/SLC15A1/SLC16A10/SLC6A18/SLC22A6/SLC16A12/SLC5A9/SLC13A4
BP	GO:0043620	regulation of DNA-templated transcription in response to stress	97	0.623931	1.77687	0.000246202	0.013308	0.0122396	966	tags=31%, list=8%, signal=29%	PSMC4/PSMD14/PSMD2/PSMC3/PSMD6/PSMD1/PSMC5/PSMC2/GCN1/PSMC1/PSMA3/PSMD7/PSMD13/PSMD8/PSMD4/PSMD3/PSMB5/PSMA5/ARNT/PSMC6/PSMB4/PSMD12/HSPA5/PSMB2/PSMD11/PSMB1/PSMA2/IMPACT/PSMA1/PSMA6
BP	GO:0048002	antigen processing and presentation of peptide antigen	151	0.559921	1.682	0.000247012	0.013308	0.0122396	1350	tags=29%, list=11%, signal=26%	PSMC4/SEC24D/PSMD14/DYNC1H1/PSMD2/PSMC3/PSMD6/PSMD1/PSMC5/PSMC2/PSMC1/PSMA3/PSMD7/PSMD13/PSMD8/PSMD4/CALR/PSMD3/PSMB5/CANX/PSMA5/SEC13/PSMC6/PSMB4/PSMD12/PSMB2/PSMD11/MFSD6/KIF3A/PSMB1/PSMA2/SEC22B/SEC31A/DCTN1/PSMA1/PSMA6/CTSE/IKBKB/CLTC/PSMA4/ACTR1B/PSMB3/KIF5A/PSMB7
BP	GO:0044772	mitotic cell cycle phase transition	489	0.422886	1.40718	0.000257307	0.0136962	0.0125966	1876	tags=21%, list=15%, signal=19%	PSMC4/MAPRE1/PSMD14/DYNC1H1/PSMD2/LSM10/PSMC3/PSMD6/PSMD1/APC/PSMC5/PSMC2/HSP90AA1/PSMC1/PSMA3/PSMD7/PSMD13/PSMD8/PSMD4/PSMD3/ANAPC4/RBL2/CCNH/PSMB5/PSMA5/PSMC6/PSMB4/PSMD12/PSMB2/ORC3/TUBB4B/CEP192/BORA/PSMD11/EIF4G1/TUBA1A/TRIP13/CEP164/PSMB1/PSMA2/TPR/AKAP9/TUBA4A/DCTN1/CDK5RAP3/PSMA1/PRMT1/MNAT1/PLK4/RCC2/CEP131/PSMA6/GPNMB/FBXL6/SPDL1/PSMA4/MDM4/CEP250/ODF2/AVEN/PPP2R1A/CEP152/CEP76/PPP3CA/I…
BP	GO:0065004	protein-DNA complex assembly	138	0.581439	1.72016	0.000257928	0.0136962	0.0125966	1460	tags=19%, list=11%, signal=17%	PSMC4/TAF1C/PSMC3/PSMC5/PSMC2/CENPO/CCNH/SET/PSMC6/ORC3/RAD23B/GRWD1/RRN3/ESR1/CENPP/HNF1B/IPO4/TAF7/MNAT1/BRF1/RSF1/SMARCA4/DAXX/RBX1/RBBP4/RAD51C
BP	GO:1901615	organic hydroxy compound metabolic process	435	-0.548805	-1.53279	0.000271269	0.0143017	0.0131535	1594	tags=24%, list=13%, signal=22%	APOA4/PTK2B/EBP/IPMK/PAH/SLC27A2/SEC14L2/SOD1/TPI1/PLA2G4A/INPP4A/PFKFB2/TTR/PARK7/HAND2/BMP5/VLDLR/TKFC/PTH1R/PCBD1/ITPKB/EPAS1/MTMR7/DHCR24/ACOT8/UGT2A2/PLCB1/MOGAT2/CYP27B1/COMT/MRS2/CYP19A1/CYB5R3/RBP4/ATP8B1/BPNT1/PLCB2/APOA1/ASIP/CBR4/APOB/NPR1/FASN/PDXP/HSD17B4/FMO5/ADH5/GATA3/ITGAM/LRAT/IYD/ALOX15B/RDH16/PLPP2/CYP51A1/CYP46A1/HMGCR/HPN/CYP27A1/TM7SF2/APOE/CITED1/GCH1/P2RY6/RDH11/ACLY/CLCN…
BP	GO:0050852	T cell receptor signaling pathway	145	0.562546	1.67647	0.000290422	0.0152029	0.0139823	653	tags=21%, list=5%, signal=20%	PSMC4/NFKBID/PSMD14/PSMD2/PSMC3/PSMD6/PSMD1/PSMC5/PSMC2/PSMC1/PSMA3/PSMD7/PSMD13/PSMD8/PSMD4/PSMD3/NFKB1/PSMB5/LGALS3/PSMA5/PSMC6/PSMB4/PSMD12/PSMB2/ITK/EIF2B1/PSMD11/PRKCQ/PSMB1/PSMA2
CC	GO:0031301	integral component of organelle membrane	295	0.472796	1.50862	0.000299534	0.0155695	0.0143195	1587	tags=22%, list=12%, signal=20%	ADCK1/DERL2/DOLPP1/QSOX2/HM13/DERL1/SLC37A1/SYVN1/P2RX2/YIF1A/PREB/SLC35B1/DPM3/CALR/SLC35B4/HSPA9/CANX/ENTPD4/STX12/DNAJC11/HSPA5/PIGG/SLC8B1/SLC35A2/SEC61A1/COA3/ERGIC1/EDEM1/UNC50/COX18/ABCD1/TBL2/PORCN/PTPRN2/IMMT/FURIN/ERGIC3/TRAM1/TMCO1/L2HGDH/SV2A/TOMM20/SLC37A3/TRABD2B/TMEM177/PCSK5/EMC4/GHITM/SPCS1/SLC22A17/SEC62/RRBP1/YIF1B/SYNGR1/ERN1/DPAGT1/EMC9/SYT9/COX11/PDIA3/SLC35A4/ABCB6/LBR/SAMM…
BP	GO:0043618	regulation of transcription from RNA polymerase II promoter in response to stress	93	0.634544	1.80331	0.000302399	0.0156085	0.0143553	1592	tags=41%, list=13%, signal=36%	PSMC4/PSMD14/PSMD2/PSMC3/PSMD6/PSMD1/PSMC5/PSMC2/GCN1/PSMC1/PSMA3/PSMD7/PSMD13/PSMD8/PSMD4/PSMD3/PSMB5/PSMA5/ARNT/PSMC6/PSMB4/PSMD12/HSPA5/PSMB2/PSMD11/PSMB1/PSMA2/IMPACT/PSMA1/PSMA6/PSMA4/PSMB3/INO80/PSMB7/RBX1/PSME4/HSF1/PSMD5
BP	GO:0006397	mRNA processing	434	0.434832	1.43338	0.000316549	0.0162253	0.0149227	2059	tags=18%, list=16%, signal=16%	TSEN15/KHDRBS3/AFF2/LSM10/WDR83/CCNH/TBRG4/LGALS3/STRAP/PRPF8/PDCD11/PTBP2/RAVER2/HABP4/SNRNP200/SNRPN/DHX9/MBNL2/YTHDC1/CDK11B/RBM41/CLNS1A/ELAVL1/RBM4/NOVA1/DDX47/EIF4A3/RBM15/C1QBP/HNRNPD/NUP98/MNAT1/PRPF31/GEMIN6/PRMT7/SNRNP48/SCAF1/HNRNPH1/SF3B3/KHSRP/GRSF1/PUF60/ERN1/NCL/PPIL3/USP4/AURKAIP1/TIA1/WDR77/RBM4B/SMN1/SF3B2/EFTUD2/SRSF4/PPIL1/HNRNPU/U2AF1L5/COIL/IK/HSF1/PRPF19/SNRPG/SF3B1/WBP11/P…
BP	GO:0050900	leukocyte migration	314	-0.575855	-1.57832	0.000334511	0.0170278	0.0156607	1780	tags=25%, list=14%, signal=22%	PTGER4/ITGA6/C5AR1/SRC/B4GALT1/CXCR4/ADORA1/ADAM10/MERTK/PTK2B/JAM2/CSF3R/BMP5/CSF1R/AIF1/TIRAP/SMPD3/CXADR/F2/TRPM2/FN1/SLC3A2/PLCB1/F11R/P2RY12/DPEP1/CRTAM/HCK/PTN/CD84/GRB14/TRIM55/CKLF/APOB/VEGFC/AKIRIN1/PIK3R1/GATA3/SELL/FPR2/ITGAM/CXCL12/CD200/SLC7A9/SWAP70/CXCL10/CEACAM5/CMKLR1/CD200R1/LYN/SIRPA/ANGPT1/PGF/CEACAM8/EPS8/ANGPT2/MMP14/MST1/KITLG/CD58/IGLL1/COL1A1/COL1A2/ST3GAL4/LGMN/ITGA2/S10…
BP	GO:0030177	positive regulation of Wnt signaling pathway	152	0.546532	1.64471	0.000363104	0.01833	0.0168584	1254	tags=26%, list=10%, signal=24%	PSMC4/PSMD14/PSMD2/PSMC3/EGF/PPM1B/PSMD6/PSMD1/PSMC5/PSMC2/PSMC1/PSMA3/PSMD7/PSMD13/PSMD8/PSMD4/PSMD3/NFKB1/PSMB5/PSMA5/PSMC6/PSMB4/PSMD12/VCP/PSMB2/RNF220/LRRK2/PSMD11/PSMB1/PSMA2/AXIN2/DISC1/PSMA1/WNT3/PSMA6/ROR2/PSMA4/SMARCA4/LRRK1/PSMB3
BP	GO:0006026	aminoglycan catabolic process	53	-0.803241	-1.80638	0.000365061	0.01833	0.0168584	681	tags=30%, list=5%, signal=29%	NCAN/GNS/VCAN/IDS/CTBS/CHP1/PGLYRP1/SGSH/PRELP/HPSE2/CHIA/SPAM1/GLB1/CSPG5/DCN/LUM
BP	GO:0007346	regulation of mitotic cell cycle	495	0.414914	1.37682	0.000368848	0.0183951	0.0169182	1636	tags=20%, list=13%, signal=18%	INS/PSMC4/MAPRE1/IL10/PSMD14/DYNC1H1/PSMD2/IL1B/LSM10/PSMC3/EGF/PSMD6/PSMD1/APC/PSMC5/PSMC2/HSP90AA1/PSMC1/PSMA3/PSMD7/PSMD13/PSMD8/PSMD4/PSMD3/ANAPC4/RBL2/PSMB5/PSMA5/STK33/PSMC6/PSMB4/PSMD12/PSMB2/TUBB4B/CEP192/BORA/PSMD11/EME1/EIF4G1/TUBA1A/TRIP13/CEP164/KIF20B/PSMB1/PSMA2/TPR/CDK11B/AKAP9/TUBA4A/FANCD2/DCTN1/SH2B1/CDK5RAP3/PSMA1/PRMT1/PLK4/RCC2/CEP131/RAD9A/PSMA6/GPNMB/SCRIB/SPDL1/PSMA4/MDM4/…
BP	GO:0051169	nuclear transport	290	0.4741	1.50943	0.000404629	0.0200441	0.0184348	1845	tags=20%, list=15%, signal=18%	DESI1/CCHCR1/CABP1/NUP205/IL1B/HEATR3/TSC1/NUP35/UHMK1/XPO4/CALR/EIF6/FYTTD1/HSPA9/MED1/SEC13/UFM1/LRRK2/NUP210/NUP188/DHX9/NUP107/TPR/YTHDC1/ABCE1/ELAVL1/RBM4/IPO4/EIF4A3/APOD/IPO5/NUP98/NSUN2/SDAD1/IPO7/GEMIN6/GLE1/STRADB/SMG1/PPP3CA/UPF1/PHB2/NUP155/NUP153/CSE1L/SMN1/SIRT7/FLNA/SRSF4/KPNB1/NUTF2/LTV1/SNRPG/TNPO3/RRS1/RANGAP1/NCBP2/ANKLE1/HNRNPA1
BP	GO:0090263	positive regulation of canonical Wnt signaling pathway	126	0.593617	1.72868	0.000407874	0.0200701	0.0184588	1104	tags=28%, list=9%, signal=26%	PSMC4/PSMD14/PSMD2/PSMC3/EGF/PPM1B/PSMD6/PSMD1/PSMC5/PSMC2/PSMC1/PSMA3/PSMD7/PSMD13/PSMD8/PSMD4/PSMD3/NFKB1/PSMB5/PSMA5/PSMC6/PSMB4/PSMD12/VCP/PSMB2/RNF220/LRRK2/PSMD11/PSMB1/PSMA2/AXIN2/PSMA1/PSMA6/ROR2/PSMA4
BP	GO:2000142	regulation of DNA-templated transcription, initiation	37	0.764908	1.82988	0.000418074	0.0204358	0.0187951	785	tags=27%, list=6%, signal=25%	PSMC4/PSMC3/PSMC5/MED16/PSMC2/MED1/PSMC6/SRF/ESR1/HNF1B
BP	GO:0006066	alcohol metabolic process	293	-0.586485	-1.59927	0.000422568	0.0205196	0.0188722	1594	tags=25%, list=13%, signal=23%	APOA4/PTK2B/EBP/IPMK/SEC14L2/SOD1/TPI1/PLA2G4A/INPP4A/TTR/PARK7/BMP5/VLDLR/TKFC/PTH1R/PCBD1/ITPKB/MTMR7/DHCR24/PLCB1/MOGAT2/CYP27B1/CYB5R3/RBP4/BPNT1/PLCB2/APOA1/CBR4/APOB/FASN/PDXP/FMO5/ADH5/LRAT/RDH16/PLPP2/CYP51A1/CYP46A1/HMGCR/CYP27A1/TM7SF2/APOE/GCH1/P2RY6/RDH11/ACLY/CLCN2/ASAH2/SORD/LSS/ACER2/GPD1/IP6K2/NR0B2/MSMO1/IDI1/PLCB4/HSD17B7/DHCR7/CYP2R1/LCAT/DGAT2/PLCD1/SQLE/DHRS3/SC5D/PLD4/RDH8/C…
CC	GO:0015935	small ribosomal subunit	65	0.683216	1.83055	0.000430197	0.0207535	0.0190873	3354	tags=65%, list=26%, signal=48%	DAP3/MRPS22/MRPS18C/MRPS12/MRPS27/RPS5/EIF2A/MRPS18B/MRPS26/MRPS21/RPS9/MRPS31/MRPS5/RPS13/DHX29/MRPS35/MRPS2/MRPS34/RPS21/MRPS16/MRPS33/LARP4/MRPS7/MRPS6/MRPS36/MRPS10/RPS6/RPS23/RPS3/UBA52/RPSA/RPS19/MRPS24/RPS18/RPS26/RPS28/EIF2D/RPS10/RPS7/MRPS15/RPS16/RPS27A
CC	GO:0000153	cytoplasmic ubiquitin ligase complex	12	0.92053	1.71709	0.000456546	0.0217837	0.0200348	129	tags=33%, list=1%, signal=33%	DERL2/SEL1L/DERL1/SYVN1
CC	GO:0120114	Sm-like protein family complex	75	0.649118	1.76469	0.000457455	0.0217837	0.0200348	2218	tags=31%, list=17%, signal=25%	LSM10/STRAP/PRPF8/SNRNP200/SNRPN/CLNS1A/PRPF31/GEMIN6/SF3B3/SMN1/SF3B2/EFTUD2/SNRPG/SF3B1/SNRPA/SNRPB2/LSM11/PPIH/SNRPF/SNRNP70/LSM6/GEMIN8/LSM5
CC	GO:0030117	membrane coat	79	0.644575	1.77558	0.000475424	0.022351	0.0205565	1833	tags=38%, list=14%, signal=33%	SEC24D/AP3B2/CLTB/PDCD6/EPN1/COPZ2/COPG2/SEC13/AP1G2/TMED7/SEC31A/COPA/COPE/KCNQ5/COPZ1/CLTC/AP4S1/CLINT1/SYNRG/ARCN1/SCYL1/SEC23B/PEF1/COPB1/COPB2/AP2A1/SYNJ1/AP1G1/SEC24A/AP2A2
CC	GO:0048475	coated membrane	79	0.644575	1.77558	0.000475424	0.022351	0.0205565	1833	tags=38%, list=14%, signal=33%	SEC24D/AP3B2/CLTB/PDCD6/EPN1/COPZ2/COPG2/SEC13/AP1G2/TMED7/SEC31A/COPA/COPE/KCNQ5/COPZ1/CLTC/AP4S1/CLINT1/SYNRG/ARCN1/SCYL1/SEC23B/PEF1/COPB1/COPB2/AP2A1/SYNJ1/AP1G1/SEC24A/AP2A2
BP	GO:0006399	tRNA metabolic process	146	0.551438	1.64881	0.000485749	0.0226918	0.02087	3275	tags=35%, list=26%, signal=26%	TSEN15/TRMT10A/MTO1/TRMU/RTCB/METTL2A/TYW1/THADA/NSUN2/ELAC1/PPA1/GRSF1/LARS2/FARSA/IARS2/NSUN6/TRMT1L/TRMT61A/METTL6/DPH3/WARS2/POP1/DTWD2/GTPBP3/CPSF1/RPP38/LSM6/ADAT1/AIMP1/SSB/NAT10/TRPT1/CARS2/ELP5/DTD2/FARSB/YARS2/ELP2/LAGE3/TRMT5/THUMPD2/AIMP2/TRMT61B/DALRD3/TYW3/RPP14/TRMT10C/ELAC2/PUS10/EARS2/TRMT1
BP	GO:0009611	response to wounding	489	-0.517929	-1.45922	0.000498508	0.0231414	0.0212835	1818	tags=24%, list=14%, signal=21%	ADAMTS18/GNAS/GP5/MAFG/CD40/SRC/B4GALT1/CXCR4/RTN4R/ENTPD1/AK3/GATA4/ACTB/TOR1A/ANXA5/MERTK/PRKAR2B/PTPRS/ADORA3/FBLN1/CERS2/CDK5/GLI1/SOD1/GNG2/BAX/HBEGF/CBX5/SYT7/PLA2G4A/SMAD3/DSP/CFLAR/FAP/ZFP36L2/DCBLD2/F2/PROZ/FN1/EPPK1/SCUBE1/F11R/RAB27A/P2RY12/PRCP/SLC4A1/LOX/CADM4/HMG20B/PTN/APOA1/GP9/DOCK11/BLOC1S3/GATA2/ARHGEF19/FZD7/GP1BB/GP1BA/PROC/F9/TGFBR2/PLAU/CD9/PIK3R1/GATA3/ARRB1/WNT5B/SYTL4/MC…
BP	GO:0006913	nucleocytoplasmic transport	287	0.474848	1.51611	0.000558425	0.025643	0.0235843	1845	tags=21%, list=15%, signal=18%	DESI1/CCHCR1/CABP1/NUP205/IL1B/HEATR3/TSC1/NUP35/UHMK1/XPO4/CALR/EIF6/FYTTD1/HSPA9/MED1/SEC13/UFM1/LRRK2/NUP210/NUP188/DHX9/NUP107/TPR/YTHDC1/ABCE1/ELAVL1/RBM4/IPO4/EIF4A3/APOD/IPO5/NUP98/NSUN2/SDAD1/IPO7/GEMIN6/GLE1/STRADB/SMG1/PPP3CA/UPF1/PHB2/NUP155/NUP153/CSE1L/SMN1/SIRT7/FLNA/SRSF4/KPNB1/NUTF2/LTV1/SNRPG/TNPO3/RRS1/RANGAP1/NCBP2/ANKLE1/HNRNPA1
BP	GO:0045930	negative regulation of mitotic cell cycle	256	0.487447	1.54155	0.0005618	0.025643	0.0235843	1636	tags=24%, list=13%, signal=22%	PSMC4/IL10/PSMD14/PSMD2/PSMC3/PSMD6/PSMD1/APC/PSMC5/PSMC2/PSMC1/PSMA3/PSMD7/PSMD13/PSMD8/PSMD4/PSMD3/RBL2/PSMB5/PSMA5/STK33/PSMC6/PSMB4/PSMD12/PSMB2/PSMD11/EME1/TRIP13/PSMB1/PSMA2/TPR/FANCD2/CDK5RAP3/PSMA1/PRMT1/RAD9A/PSMA6/GPNMB/SCRIB/SPDL1/PSMA4/MDM4/AVEN/PSMB3/AURKAIP1/PSMG2/CDC6/PSMB7/CNOT11/CDK5RAP2/CUL1/RBX1/CDK4/PSME4/RINT1/IK/CARM1/PSMD5/MDM2/TAOK3/PRMT2/ANGEL2
BP	GO:0070897	transcription preinitiation complex assembly	31	0.790437	1.83603	0.00056282	0.025643	0.0235843	1196	tags=35%, list=9%, signal=32%	PSMC4/TAF1C/PSMC3/PSMC5/PSMC2/PSMC6/RRN3/ESR1/TAF7/BRF1/SMARCA4
BP	GO:0044273	sulfur compound catabolic process	46	-0.832045	-1.84579	0.000568442	0.0257403	0.0236738	1155	tags=33%, list=9%, signal=30%	GADL1/NCAN/DPEP1/GNS/GGT1/VCAN/IDS/PRELP/CDO1/GGT5/GLB1/CSPG5/DCN/LUM/CSAD
BP	GO:2000736	regulation of stem cell differentiation	98	0.616286	1.75357	0.000595473	0.0267999	0.0246483	966	tags=31%, list=8%, signal=29%	PSMC4/PSMD14/PSMD2/PSMC3/PSMD6/PSMD1/PSMC5/PSMC2/PSMC1/PSMA3/PSMD7/PSMD13/PSMD8/PSMD4/PSMD3/HSPA9/PSMB5/KMT2A/SETD1A/PSMA5/PSMC6/PSMB4/PSMD12/PSMB2/PSMD11/PSMB1/PSMA2/PSMA1/NSUN2/PSMA6
BP	GO:0006027	glycosaminoglycan catabolic process	51	-0.791246	-1.77846	0.00060843	0.0272171	0.025032	1113	tags=27%, list=9%, signal=25%	NCAN/GNS/VCAN/IDS/CHP1/PGLYRP1/SGSH/PRELP/HPSE2/SPAM1/GLB1/CSPG5/DCN/LUM
BP	GO:0033866	nucleoside bisphosphate biosynthetic process	59	-0.78021	-1.77674	0.000620445	0.0272589	0.0250705	884	tags=15%, list=7%, signal=14%	HACD2/CBR4/FASN/GSTZ1/PPT1/ACLY/ACSL5/ACSS2/SCD5
BP	GO:0034030	ribonucleoside bisphosphate biosynthetic process	59	-0.78021	-1.77674	0.000620445	0.0272589	0.0250705	884	tags=15%, list=7%, signal=14%	HACD2/CBR4/FASN/GSTZ1/PPT1/ACLY/ACSL5/ACSS2/SCD5
BP	GO:0034033	purine nucleoside bisphosphate biosynthetic process	59	-0.78021	-1.77674	0.000620445	0.0272589	0.0250705	884	tags=15%, list=7%, signal=14%	HACD2/CBR4/FASN/GSTZ1/PPT1/ACLY/ACSL5/ACSS2/SCD5
BP	GO:0060260	regulation of transcription initiation from RNA polymerase II promoter	33	0.792577	1.85468	0.000642038	0.0280407	0.0257895	785	tags=30%, list=6%, signal=29%	PSMC4/PSMC3/PSMC5/MED16/PSMC2/MED1/PSMC6/SRF/ESR1/HNF1B
BP	GO:0030970	retrograde protein transport, ER to cytosol	25	0.818466	1.83135	0.000672163	0.0290131	0.0266838	857	tags=44%, list=7%, signal=41%	DERL2/HM13/SEL1L/DERL1/SYVN1/SEC61B/HSP90B1/VCP/NPLOC4/EDEM1/ERLEC1
BP	GO:1903513	endoplasmic reticulum to cytosol transport	25	0.818466	1.83135	0.000672163	0.0290131	0.0266838	857	tags=44%, list=7%, signal=41%	DERL2/HM13/SEL1L/DERL1/SYVN1/SEC61B/HSP90B1/VCP/NPLOC4/EDEM1/ERLEC1
BP	GO:0051123	RNA polymerase II preinitiation complex assembly	19	0.853661	1.785	0.000710958	0.0302356	0.0278081	852	tags=37%, list=7%, signal=34%	PSMC4/PSMC3/PSMC5/PSMC2/PSMC6/ESR1/TAF7
BP	GO:0060071	Wnt signaling pathway, planar cell polarity pathway	96	0.605418	1.72765	0.000711071	0.0302356	0.0278081	1104	tags=31%, list=9%, signal=29%	PSMC4/PSMD14/PSMD2/PSMC3/PSMD6/PSMD1/PSMC5/PSMC2/PSMC1/PSMA3/PSMD7/PSMD13/PSMD8/PSMD4/PSMD3/VANGL1/PSMB5/PSMA5/PSMC6/PSMB4/PSMD12/PSMB2/PSMD11/PSMB1/PSMA2/PSMA1/PSMA6/CLTC/ROR2/PSMA4
BP	GO:0097711	ciliary basal body-plasma membrane docking	86	0.605651	1.69723	0.000712775	0.0302356	0.0278081	2534	tags=41%, list=20%, signal=33%	MAPRE1/DYNC1H1/HSP90AA1/TUBB4B/CEP192/TUBA1A/CEP164/AKAP9/TUBA4A/NPHP4/DCTN1/NPHP1/IQCB1/PLK4/CEP131/CEP250/ODF2/PPP2R1A/CEP152/CEP76/CDK5RAP2/FBF1/CEP41/SSNA1/DCTN2/RAB11A/YWHAG/TUBG1/HAUS7/CEP63/MKS1/MARK4/NINL/PCM1/CEP162
CC	GO:0101031	chaperone complex	25	0.816817	1.82766	0.000729611	0.0304021	0.0279613	1721	tags=64%, list=14%, signal=55%	SDF2L1/DNAJB11/SDF2/TSC1/STIP1/CCT3/CCT6A/CCT4/PTGES3/CDC37/CCT8/PSMG2/PPP5C/CCT7/HSF1/CCT5
BP	GO:0061418	regulation of transcription from RNA polymerase II promoter in response to hypoxia	66	0.665427	1.78843	0.000730663	0.0304021	0.0279613	653	tags=38%, list=5%, signal=36%	PSMC4/PSMD14/PSMD2/PSMC3/PSMD6/PSMD1/PSMC5/PSMC2/PSMC1/PSMA3/PSMD7/PSMD13/PSMD8/PSMD4/PSMD3/PSMB5/PSMA5/ARNT/PSMC6/PSMB4/PSMD12/PSMB2/PSMD11/PSMB1/PSMA2
BP	GO:0006406	mRNA export from nucleus	96	0.604954	1.72632	0.000733177	0.0304021	0.0279613	3435	tags=50%, list=27%, signal=37%	NUP205/NUP35/FYTTD1/SEC13/NUP210/NUP188/NUP107/TPR/YTHDC1/EIF4A3/NUP98/NSUN2/GLE1/SMG1/UPF1/NUP155/NUP153/SRSF4/NCBP2/POLR2D/CPSF1/NUP160/NUP85/NUP88/EIF4E/NUP133/U2AF1/NUP93/NUP54/SRSF7/SRSF3/THOC6/UPF2/SRRM1/AAAS/THOC3/SRSF11/DDX39B/CPSF2/RNPS1/AKAP8L/IWS1/SRSF6/DHX38/RAE1/SRSF2/CHTOP/MAGOHB
BP	GO:0071427	mRNA-containing ribonucleoprotein complex export from nucleus	96	0.604954	1.72632	0.000733177	0.0304021	0.0279613	3435	tags=50%, list=27%, signal=37%	NUP205/NUP35/FYTTD1/SEC13/NUP210/NUP188/NUP107/TPR/YTHDC1/EIF4A3/NUP98/NSUN2/GLE1/SMG1/UPF1/NUP155/NUP153/SRSF4/NCBP2/POLR2D/CPSF1/NUP160/NUP85/NUP88/EIF4E/NUP133/U2AF1/NUP93/NUP54/SRSF7/SRSF3/THOC6/UPF2/SRRM1/AAAS/THOC3/SRSF11/DDX39B/CPSF2/RNPS1/AKAP8L/IWS1/SRSF6/DHX38/RAE1/SRSF2/CHTOP/MAGOHB
BP	GO:0042060	wound healing	394	-0.546115	-1.5197	0.000828115	0.034147	0.0314055	2230	tags=30%, list=18%, signal=26%	DAG1/KNG1/ITGA9/YAP1/FKBP10/NOG/CLDN19/PIK3CG/HMOX1/SERPINE1/PRKCD/HBG2/ADORA2A/F2R/ITGB1/APOH/PLPP3/FGF1/GNA13/AJUBA/TYRO3/ANXA1/ADAMTS18/GNAS/GP5/MAFG/CD40/SRC/B4GALT1/CXCR4/ENTPD1/AK3/GATA4/ACTB/TOR1A/ANXA5/MERTK/PRKAR2B/FBLN1/GNG2/HBEGF/CBX5/SYT7/PLA2G4A/SMAD3/DSP/CFLAR/FAP/DCBLD2/F2/PROZ/FN1/EPPK1/SCUBE1/F11R/RAB27A/P2RY12/PRCP/SLC4A1/LOX/CADM4/HMG20B/GP9/DOCK11/BLOC1S3/GATA2/ARHGEF19/FZD7/G…
BP	GO:0042255	ribosome assembly	52	0.68888	1.76448	0.000863521	0.0354092	0.0325664	3184	tags=50%, list=25%, signal=38%	MDN1/EIF6/RPL5/C1QBP/RPF2/MRPL22/RPS5/EIF2A/DHX30/NIP7/PRKDC/RRS1/PPAN/DHX29/MRPS2/RPL10/MRPS7/ABT1/RPL11/MRTO4/RPSA/RPS19/RPS28/BOP1/RPS10/RPL23A
BP	GO:0006417	regulation of translation	296	0.454087	1.45061	0.000904075	0.0368673	0.0339074	2185	tags=29%, list=17%, signal=25%	PATL2/XRN1/AGO1/IGF2BP1/OGFOD1/GCN1/LRPPRC/TSC1/UHMK1/CALR/EIF6/RPL5/EIF2B1/HABP4/EIF4H/LTN1/SRP9/DNAJC1/EIF4G1/THBS1/COA3/DDX6/DHX9/EIF5B/TPR/VIM/DNAJC3/ELAVL1/RBM4/TACO1/IMPACT/LARP1/TMED2/EIF4A3/C1QBP/HNRNPD/TRAP1/EIF3C/GLE1/MRPS27/MTIF2/KHSRP/CPEB2/UPF1/CSDE1/NCL/TIA1/PA2G4/CNOT11/LARP4B/NANOS1/EIF2A/RBM4B/BCL3/CDK4/SHMT1/RPS9/GSPT1/NSUN5/EIF3E/IGF2BP2/EIF4G3/DPH3/PER1/PRKDC/CDC123/NCBP2/TNRC…
BP	GO:0035384	thioester biosynthetic process	47	-0.801461	-1.78436	0.000921024	0.037148	0.0341656	884	tags=19%, list=7%, signal=18%	HACD2/CBR4/FASN/GSTZ1/PPT1/ACLY/ACSL5/ACSS2/SCD5
BP	GO:0071616	acyl-CoA biosynthetic process	47	-0.801461	-1.78436	0.000921024	0.037148	0.0341656	884	tags=19%, list=7%, signal=18%	HACD2/CBR4/FASN/GSTZ1/PPT1/ACLY/ACSL5/ACSS2/SCD5
BP	GO:0042274	ribosomal small subunit biogenesis	68	0.649144	1.7433	0.000930215	0.0373148	0.034319	3311	tags=53%, list=26%, signal=39%	WDR3/HEATR1/RIOK1/NOP14/RPS5/BMS1/RIOK3/UTP3/BYSL/NOM1/LTV1/UTP20/PRKDC/RRS1/EMG1/RRP36/NOL10/KRI1/LSM6/NAT10/RPS21/GTF2H5/ERCC2/MRPS7/ABT1/SNU13/RPS6/TSR2/RPSA/RPS19/RPS28/RPS10/RPS7/NOP9/RPS16/WDR46
BP	GO:0006900	vesicle budding from membrane	93	0.605147	1.71977	0.000981499	0.0391591	0.0360153	1920	tags=32%, list=15%, signal=28%	SEC24D/ANXA2/SEC16A/PREB/PDCD6/TMED10/SEC16B/SEC13/SCFD1/LMAN1/SEC22B/SEC31A/TMED2/NSF/GOLGA2/SEC23B/TMED9/RAB1B/USO1/ARFGAP2/GBF1/PEF1/RAB1A/CHMP5/SEC24A/BET1/VAPB/GOSR2/RAB7A/TFG
BP	GO:0006626	protein targeting to mitochondrion	82	0.623609	1.72344	0.00100008	0.0396308	0.0364491	1212	tags=20%, list=10%, signal=18%	HSPD1/PMPCB/HAX1/HSP90AA1/PITRM1/SAE1/LRRK2/HSPA4/FBXW7/LMAN1/MIPEP/TSPO/TOMM20/MFN2/ATG13/TIMM8B
CC	GO:0005643	nuclear pore	64	0.662595	1.77853	0.00100406	0.0396308	0.0364491	2630	tags=42%, list=21%, signal=34%	NUP205/NUP35/XPO4/SEC13/NUP210/NUP188/NUP107/TPR/IPO5/NUP98/IPO7/GLE1/NUP155/NUP153/KPNB1/AHCTF1/NUTF2/RANGAP1/XPOT/TNKS/NUP160/NUP85/NUP88/NUP133/RAN/NUP93/NUP54
MF	GO:0022853	active ion transmembrane transporter activity	152	-0.640411	-1.65249	0.00104438	0.041003	0.0377111	366	tags=11%, list=3%, signal=10%	ATP1A2/SLCO2A1/SLC5A2/SLC37A4/ABCA12/SLC6A6/ABCB11/SLC13A5/SLC15A2/SLC10A1/SLC6A7/SLC10A2/SLC15A1/SLC22A6/SLC5A9/SLC13A4
MF	GO:0016887	ATPase activity	372	0.426488	1.38157	0.00108907	0.0425315	0.0391169	1743	tags=23%, list=14%, signal=21%	HSPD1/PSMC4/MDN1/SKIV2L/DYNC1H1/ATP9B/ABCC10/TDRD9/PSMC3/CFTR/PSMD6/PSMC5/ATP13A3/PSMC2/HSP90AA1/PSMC1/ATP10A/ABCC8/CHD5/ABCC12/DNHD1/DICER1/HSPA9/HELQ/ABCC4/ABCA4/PSMC6/VCP/HSPA5/KIF27/SNRNP200/VWA8/KIF3A/TRIP13/ATP10D/DDX6/ATP2A2/DHX9/KIF20B/ABCD1/SPG7/ASCC3/ABCE1/DDX47/EIF4A3/ABCC1/CLPP/HSPA13/ABCF3/CCT8/HELZ/DQX1/ERCC6/RFC1/SMARCA4/UPF1/SPATA5L1/BTAF1/TDRD12/INO80/DHX33/ABCB8/NSF/KIF5A/DDX56/…
BP	GO:1901568	fatty acid derivative metabolic process	55	-0.77837	-1.7532	0.00110382	0.0428805	0.0394378	907	tags=24%, list=7%, signal=22%	HACD2/GGT1/CBR4/FASN/HSD17B4/ALOX15B/PPT1/ACLY/DGAT2/AACS/GGT5/ACSL5/SCD5
CC	GO:0005839	proteasome core complex	17	0.851961	1.73017	0.0011179	0.0432001	0.0397318	1350	tags=71%, list=11%, signal=63%	PSMA3/PSMB5/PSMA5/PSMB4/PSMB2/PSMB1/PSMA2/PSMA1/PSMA6/PSMA4/PSMB3/PSMB7
BP	GO:0033865	nucleoside bisphosphate metabolic process	107	-0.689191	-1.69463	0.00114277	0.0434784	0.0399878	1180	tags=13%, list=9%, signal=12%	ACOT8/HACD2/BPNT1/CBR4/FASN/HSD17B4/HMGCR/GSTZ1/PPT1/ACLY/DGAT2/ACSL5/ACSS2/SCD5
BP	GO:0033875	ribonucleoside bisphosphate metabolic process	107	-0.689191	-1.69463	0.00114277	0.0434784	0.0399878	1180	tags=13%, list=9%, signal=12%	ACOT8/HACD2/BPNT1/CBR4/FASN/HSD17B4/HMGCR/GSTZ1/PPT1/ACLY/DGAT2/ACSL5/ACSS2/SCD5
BP	GO:0034032	purine nucleoside bisphosphate metabolic process	107	-0.689191	-1.69463	0.00114277	0.0434784	0.0399878	1180	tags=13%, list=9%, signal=12%	ACOT8/HACD2/BPNT1/CBR4/FASN/HSD17B4/HMGCR/GSTZ1/PPT1/ACLY/DGAT2/ACSL5/ACSS2/SCD5
BP	GO:0007631	feeding behavior	66	0.656633	1.7648	0.00115403	0.0436815	0.0401745	570	tags=15%, list=4%, signal=15%	INS/GCG/DERL2/NEGR1/CALCA/ADM2/OPRM1/NMUR2/DACH1/NPB
BP	GO:0097064	ncRNA export from nucleus	36	0.751931	1.7833	0.00117493	0.0442456	0.0406934	2630	tags=58%, list=21%, signal=46%	NUP205/TSC1/NUP35/SEC13/NUP210/NUP188/NUP107/TPR/NUP98/NUP155/NUP153/NCBP2/XPOT/NUP160/SSB/NUP85/NUP88/NUP133/RAN/NUP93/NUP54
MF	GO:0022804	active transmembrane transporter activity	224	-0.604312	-1.61828	0.00120582	0.0451784	0.0415513	395	tags=11%, list=3%, signal=11%	ABCB1/ATP1A2/SLCO2A1/SLC5A2/SLC37A4/SLC25A30/ABCA12/SLC6A6/SLC6A19/ABCB11/SLC13A5/SLC15A2/ABCG5/SLC10A1/SLC6A7/SLC10A2/ABCG8/SLC15A1/SLC16A10/SLC6A18/SLC22A6/SLC16A12/SLC5A9/SLC13A4
MF	GO:0003743	translation initiation factor activity	46	0.703272	1.75944	0.00122557	0.0456107	0.0419489	2335	tags=43%, list=18%, signal=36%	EIF6/EIF1AD/EIF2B1/EIF4H/EIF4G1/EIF5B/EIF3C/MTIF2/DENR/EIF2A/EIF3E/EIF4G3/EIF4A1/EIF4B/DHX29/EIF5/EIF3M/EIF3L/EIF2S2/EIF4E
BP	GO:0000184	nuclear-transcribed mRNA catabolic process, nonsense-mediated decay	113	0.567862	1.63395	0.00123636	0.0456107	0.0419489	4145	tags=62%, list=33%, signal=42%	SKIV2L/NBAS/RPL5/EIF4G1/EIF4A3/PPP2R1A/SMG1/RPS5/UPF1/RPS9/GSPT1/EIF3E/RPS13/NCBP2/RPL10/RPS21/ETF1/RPL35/RPL13/RPS6/RPS23/UPF2/RPS3/UBA52/RPL11/RPSA/RPS19/RPL14/RPS18/RPS26/RPS28/RPL28/RPS10/RPS7/RPL23A/RNPS1/RPL21/RPS16/RPS27A/RPL37/MAGOHB/RPL15/RPL36/RPL27A/RPL13A/RBM8A/RPL24/RPL35A/RPL31/RPL4/NCBP1/RPL8/RPS29/RPL29/RPLP0/RPL26/RPL36A/RPLP1/RPS8/RPS12/RPS11/RPL30/RPS17/RPS20/RPS15/RPL7A/RPS27/…
CC	GO:0022626	cytosolic ribosome	89	0.602403	1.68986	0.00123953	0.0456107	0.0419489	4189	tags=70%, list=33%, signal=47%	RPL5/APOD/RPS5/EIF2A/RPS9/MRPL1/RPS13/DHX29/RPL10/RPS21/LARP4/RPL35/RPL13/RPS6/RPS23/RPS3/UBA52/RPL11/RPSA/RPS19/RPL14/RPS18/RPS26/NUFIP1/RPS28/RPL28/EIF2D/RPS10/RPS7/RPL23A/RPL21/RPS16/RPS27A/RPL37/RPL15/RPL36/RPL27A/RPL13A/RPL24/RPL35A/RPL31/RPL4/RPL8/RPS29/RPL29/RPLP0/RPL26/RPL36A/RPLP1/RPS8/RPS12/RPS11/RPL30/RPS17/RPS20/RPS15/RPL7A/RPS27/RPS25/RPL23/RPS14/RPL7L1
CC	GO:0005581	collagen trimer	71	-0.746811	-1.74755	0.00124207	0.0456107	0.0419489	1148	tags=35%, list=9%, signal=32%	C1QC/SCARA3/LOX/COL20A1/COLEC10/GLDN/C1QA/C1QTNF5/COL6A6/C1QL4/OTOL1/C1QTNF7/COL6A1/COL1A1/SFTPA2/C1QL3/COL11A1/COL1A2/EMID1/SFTPD/CTHRC1/COL6A2/DCN/COL8A2/LUM
BP	GO:0072330	monocarboxylic acid biosynthetic process	157	-0.637118	-1.65038	0.00126262	0.0461357	0.0424317	962	tags=17%, list=8%, signal=16%	ACOT8/PTGES/HACD2/APOA1/CBR4/FASN/HSD17B4/ALOX15B/LIPH/CYP46A1/CYP27A1/PLA2G3/ACMSD/ACLY/ASAH2/APOC2/ALDH8A1/TBXAS1/ABCB11/CYP1A1/MALRD1/CYP3A4/PECR/ACSS2/FADS2/GATM/SCD5
BP	GO:0042273	ribosomal large subunit biogenesis	65	0.66085	1.77063	0.00128675	0.0467856	0.0430294	2921	tags=42%, list=23%, signal=32%	MDN1/HEATR3/EIF6/RPL5/SDAD1/RPF2/RSL1D1/NHP2/DHX30/NIP7/MRPL1/RRS1/PPAN/WDR74/GTF3A/ZNF622/RPL10/FTSJ3/RPL35/NIFK/SNU13/MALSU1/RPL11/WDR12/MRTO4/NOL9/RPL14
BP	GO:0050851	antigen receptor-mediated signaling pathway	178	0.503217	1.5379	0.00143603	0.0519573	0.047786	653	tags=17%, list=5%, signal=17%	PSMC4/NFKBID/PSMD14/PSMD2/PSMC3/PSMD6/PSMD1/PSMC5/PSMC2/SLC39A10/PSMC1/PSMA3/PSMD7/PSMD13/PSMD8/PSMD4/PSMD3/NFKB1/PSMB5/LGALS3/PSMA5/PSMC6/PSMB4/PSMD12/PSMB2/ITK/EIF2B1/PSMD11/PRKCQ/PSMB1/PSMA2
BP	GO:0060261	positive regulation of transcription initiation from RNA polymerase II promoter	27	0.806277	1.83724	0.00145694	0.0520481	0.0478694	1110	tags=41%, list=9%, signal=37%	PSMC4/PSMC3/PSMC5/MED16/PSMC2/MED1/PSMC6/SRF/ESR1/HNF1B/ERCC6
BP	GO:0006637	acyl-CoA metabolic process	83	-0.712347	-1.70765	0.00146607	0.0520481	0.0478694	884	tags=14%, list=7%, signal=14%	ACOT8/HACD2/CBR4/FASN/HSD17B4/GSTZ1/PPT1/ACLY/DGAT2/ACSL5/ACSS2/SCD5
BP	GO:0035383	thioester metabolic process	83	-0.712347	-1.70765	0.00146607	0.0520481	0.0478694	884	tags=14%, list=7%, signal=14%	ACOT8/HACD2/CBR4/FASN/HSD17B4/GSTZ1/PPT1/ACLY/DGAT2/ACSL5/ACSS2/SCD5
CC	GO:0005793	endoplasmic reticulum-Golgi intermediate compartment	116	0.574901	1.65931	0.00146674	0.0520481	0.0478694	1576	tags=34%, list=12%, signal=30%	INS/PDIA6/YIF1A/UGGT2/UGGT1/ERP44/SURF4/NUCB2/TMED10/TRIP11/CALR/DICER1/COPZ2/COPG2/VMP1/HSPA5/CLN8/RAB2A/MYDGF/ERGIC1/LMAN1/SEC22B/TMED7/ERGIC3/TMED4/TMED2/MGAT4A/LMAN2L/GOLGB1/ERGIC2/YIF1B/GOLGA2/SCYL1/TMED9/RAB1B/LRPAP1/GBF1/SLC35C2/COPB1
BP	GO:2000144	positive regulation of DNA-templated transcription, initiation	30	0.777853	1.79408	0.00147912	0.0522361	0.0480424	785	tags=33%, list=6%, signal=31%	PSMC4/PSMC3/PSMC5/MED16/PSMC2/MED1/PSMC6/SRF/ESR1/HNF1B
BP	GO:0008033	tRNA processing	117	0.552807	1.60144	0.00155889	0.0547912	0.0503923	2351	tags=22%, list=18%, signal=18%	TSEN15/TRMT10A/MTO1/TRMU/RTCB/METTL2A/TYW1/THADA/NSUN2/ELAC1/GRSF1/NSUN6/TRMT1L/TRMT61A/METTL6/DPH3/POP1/DTWD2/GTPBP3/CPSF1/RPP38/LSM6/ADAT1/SSB/NAT10/TRPT1
BP	GO:0031330	negative regulation of cellular catabolic process	198	0.487769	1.4981	0.00160242	0.0560543	0.051554	1646	tags=22%, list=13%, signal=19%	INS/IL10/RIC1/SGTA/ANXA2/IGF2BP1/VIP/NBAS/LRPPRC/TSC1/ATP2B4/RPL5/LRRK2/CLEC16A/EIF4G1/SCFD1/USP7/DHX9/KLHL40/ALAD/SEC22B/ELAVL1/USP14/FURIN/LARP1/AXIN2/TSPO/CDK5RAP3/HNRNPD/NSUN2/BAG5/N4BP1/SLIRP/HERC1/SMG1/TMEM39A/GOLGA2/LARP4B/HNRNPU/ADRA1A/PKP1/ANGEL2/MTMR9
BP	GO:1903008	organelle disassembly	89	0.593584	1.66512	0.00166563	0.0579906	0.0533349	1599	tags=26%, list=13%, signal=23%	HAX1/UFL1/VPS13D/UFM1/VCP/VPS13C/FBXW7/CISD2/UBA5/GFM2/TSPO/CDC37/MFN2/ATG2A/UFC1/MTIF2/ATG13/DENR/PHB2/GOLGA2/HK2/GBF1/MAP1LC3C
BP	GO:0002244	hematopoietic progenitor cell differentiation	140	0.527709	1.55987	0.00170217	0.0589845	0.054249	653	tags=21%, list=5%, signal=21%	PSMC4/PSMD14/PSMD2/PSMC3/PSMD6/PSMD1/PSMC5/PSMC2/PSMC1/PSMA3/UFL1/PSMD7/PSMD13/PSMD8/PSMD4/PSMD3/HSPA9/PSMB5/KMT2A/SETD1A/PSMA5/PSMC6/PSMB4/PSMD12/SRF/PSMB2/PSMD11/FST/PSMB1/PSMA2
BP	GO:0009895	negative regulation of catabolic process	243	0.462203	1.44887	0.00180467	0.0622441	0.0572469	1498	tags=20%, list=12%, signal=18%	INS/IL10/RIC1/IL1B/SGTA/ANXA2/IGF2BP1/VIP/ADGRB1/NBAS/LRPPRC/TSC1/ATP2B4/RPL5/LRRK2/CLEC16A/EIF4G1/SCFD1/USP7/DHX9/KLHL40/ALAD/SEC22B/ELAVL1/USP14/FURIN/LARP1/AXIN2/TSPO/CDK5RAP3/HNRNPD/NSUN2/BAG5/N4BP1/SLIRP/MDM4/HERC1/SF3B3/SMG1/FMN2/TMEM39A/HDAC4/GOLGA2/LARP4B/MYCBP2/FLNA/HNRNPU/ADRA1A
BP	GO:0010948	negative regulation of cell cycle process	285	0.44233	1.41393	0.00182705	0.0625536	0.0575315	1645	tags=22%, list=13%, signal=20%	PSMC4/PSMD14/PSMD2/PSMC3/PSMD6/PSMD1/APC/PSMC5/PSMC2/PSMC1/PSMA3/PSMD7/LIF/PSMD13/PSMD8/PSMD4/CALR/PSMD3/RBL2/RAD1/PSMB5/PSMA5/PSMC6/PSMB4/SUSD2/PSMD12/PSMB2/PSMD11/TRIP13/PSMB1/PSMA2/TPR/CDK5RAP3/PSMA1/PRMT1/PSMA6/GPNMB/WAPL/SPDL1/PSMA4/MDM4/AVEN/PSMB3/AURKAIP1/PSMG2/MGA/CDC6/PSMB7/CNOT11/CDK5RAP2/L3MBTL2/CUL1/RBX1/RBBP4/CDK4/PSME4/RINT1/IK/CARM1/PSMD5/MDM2/TAOK3/PRMT2/RAD51
BP	GO:0090175	regulation of establishment of planar polarity	98	0.592247	1.68517	0.00183059	0.0625536	0.0575315	1104	tags=31%, list=9%, signal=28%	PSMC4/PSMD14/PSMD2/PSMC3/PSMD6/PSMD1/PSMC5/PSMC2/PSMC1/PSMA3/PSMD7/PSMD13/PSMD8/PSMD4/PSMD3/VANGL1/PSMB5/PSMA5/PSMC6/PSMB4/PSMD12/PSMB2/PSMD11/PSMB1/PSMA2/PSMA1/PSMA6/CLTC/ROR2/PSMA4
BP	GO:1904380	endoplasmic reticulum mannose trimming	15	0.871413	1.71316	0.00184426	0.0627305	0.0576942	610	tags=47%, list=5%, signal=44%	DERL2/SEL1L/SYVN1/UGGT2/UGGT1/MAN1B1/EDEM1
BP	GO:0016053	organic acid biosynthetic process	237	-0.5818	-1.5631	0.00186584	0.0631732	0.0581013	1214	tags=18%, list=10%, signal=16%	RIMKLA/GAD1/ACOT8/PTGES/GADL1/GOT2/HACD2/CLN3/APOA1/GGT1/CBR4/FASN/HSD17B4/ALOX15B/LIPH/CPS1/CYP46A1/HAAO/CYP27A1/PLA2G3/ACCS/ACMSD/ACLY/ASAH2/APOC2/ALDH8A1/CDO1/TBXAS1/ABCB11/GGT5/BHMT/NAGS/CYP1A1/MALRD1/DPYD/CYP3A4/PECR/ACSS2/FADS2/GATM/SCD5/CSAD
BP	GO:0006959	humoral immune response	121	-0.663837	-1.65561	0.0019173	0.0646017	0.0594152	1440	tags=29%, list=11%, signal=26%	POU2F2/C4B/C6/F2/PDZD11/C8G/CRP/C1QC/C8A/COLEC10/BPI/CFB/C1QA/LTA/CFI/GATA3/GAPDH/CXCL10/LTF/RGCC/A2M/PGLYRP1/CPN1/IGLL1/MFAP4/PAX5/SERPING1/C8B/OCIAD2/LYZ/SFTPD/LEAP2/CXCL14/C7/CCR6
MF	GO:0005048	signal sequence binding	35	0.736051	1.73406	0.00192553	0.0646017	0.0594152	1980	tags=37%, list=16%, signal=31%	CABP1/SEC61A1/IPO4/SRP14/SRP54/TOMM20/IPO5/KDELR2/NUP98/NUP153/KPNB1/SRP68/AP2B1
MF	GO:0140296	general transcription initiation factor binding	39	0.724239	1.75627	0.00205312	0.0685705	0.0630654	1688	tags=28%, list=13%, signal=25%	PSMC5/PSMC2/PSMC1/ESR1/DRAP1/TAF7/BRF1/FBL/HNRNPU/RUVBL2/BDP1
BP	GO:1901570	fatty acid derivative biosynthetic process	43	-0.805338	-1.77698	0.00206481	0.0686502	0.0631387	907	tags=26%, list=7%, signal=24%	HACD2/GGT1/CBR4/FASN/ALOX15B/PPT1/ACLY/AACS/GGT5/ACSL5/SCD5
BP	GO:0006409	tRNA export from nucleus	32	0.752571	1.76069	0.00209031	0.0688775	0.0633477	2630	tags=59%, list=21%, signal=47%	NUP205/NUP35/SEC13/NUP210/NUP188/NUP107/TPR/NUP98/NUP155/NUP153/XPOT/NUP160/SSB/NUP85/NUP88/NUP133/RAN/NUP93/NUP54
BP	GO:0071431	tRNA-containing ribonucleoprotein complex export from nucleus	32	0.752571	1.76069	0.00209031	0.0688775	0.0633477	2630	tags=59%, list=21%, signal=47%	NUP205/NUP35/SEC13/NUP210/NUP188/NUP107/TPR/NUP98/NUP155/NUP153/XPOT/NUP160/SSB/NUP85/NUP88/NUP133/RAN/NUP93/NUP54
BP	GO:0048863	stem cell differentiation	214	0.485213	1.50465	0.00217032	0.0711963	0.0654803	968	tags=20%, list=8%, signal=19%	PSMC4/PSMD14/PSMD2/PSMC3/PSMD6/PSMD1/PSMC5/PSMC2/PSMC1/PDCD6/PSMA3/UFL1/PSMD7/LIF/PDX1/PSMD13/PSMD8/PSMD4/PSMD3/SEMA5B/HSPA9/PSMB5/KMT2A/SETD1A/PSMA5/GPM6A/PSMC6/PSMB4/PSMD12/SRF/PSMB2/SEMA6B/PSMD11/PSMB1/PSMA2/ESR1/SETD6/PSMA1/NSUN2/ISL1/WNT3/PSMA6/FRZB
BP	GO:0001736	establishment of planar polarity	108	0.56691	1.61905	0.00222964	0.0722681	0.0664661	1104	tags=29%, list=9%, signal=26%	PSMC4/PSMD14/PSMD2/PSMC3/PSMD6/PSMD1/PSMC5/PSMC2/PSMC1/PSMA3/PSMD7/PSMD13/PSMD8/PSMD4/PSMD3/VANGL1/PSMB5/PSMA5/PSMC6/PSMB4/PSMD12/PSMB2/PSMD11/PSMB1/PSMA2/NPHP1/PSMA1/PSMA6/CLTC/ROR2/PSMA4
BP	GO:0007164	establishment of tissue polarity	108	0.56691	1.61905	0.00222964	0.0722681	0.0664661	1104	tags=29%, list=9%, signal=26%	PSMC4/PSMD14/PSMD2/PSMC3/PSMD6/PSMD1/PSMC5/PSMC2/PSMC1/PSMA3/PSMD7/PSMD13/PSMD8/PSMD4/PSMD3/VANGL1/PSMB5/PSMA5/PSMC6/PSMB4/PSMD12/PSMB2/PSMD11/PSMB1/PSMA2/NPHP1/PSMA1/PSMA6/CLTC/ROR2/PSMA4
BP	GO:0090090	negative regulation of canonical Wnt signaling pathway	152	0.511266	1.53859	0.00223237	0.0722681	0.0664661	1428	tags=29%, list=11%, signal=26%	PSMC4/PSMD14/PSMD2/PSMC3/PSMD6/PSMD1/APC/PSMC5/PSMC2/PSMC1/PSMA3/PSMD7/PSMD13/PSMD8/PSMD4/SOX2/PSMD3/PSMB5/PSMA5/PSMC6/PSMB4/PSMD12/PSMB2/TBX18/PSMD11/PSMB1/SOST/PSMA2/AXIN2/NPHP4/PSMA1/ISL1/PTPRU/PSMA6/FRZB/ROR2/PSMA4/AMER2/PSMB3/PSMB7/SOX10/RBX1/IGFBP1/STK4
BP	GO:0010810	regulation of cell-substrate adhesion	176	-0.597987	-1.56802	0.00230937	0.0744342	0.0684583	2537	tags=35%, list=20%, signal=28%	IQGAP1/CRKL/CD3E/CEACAM6/HSD17B12/ATXN3/NPNT/RIN2/EPB41L5/NEDD9/CORO1C/PREX1/DUSP3/DAG1/PEAK1/CORO2B/SERPINE1/COL16A1/RAC2/EPHA3/ABL1/GPM6B/ITGA6/SRC/WDPCP/SPOCK2/PTK2B/FBLN1/CDK6/ONECUT1/SMAD3/EGFL6/PLEKHA2/FAM107A/RAC3/TACSTD2/FN1/PTN/APOA1/EMP2/FZD7/TRIOBP/PLAU/PIK3R1/NID1/FZD4/BCL6/ANGPT2/NDNF/DDR1/MMP14/ACER2/COL1A1/PLG/FOXF1/NRP1/CCL25/CSF1/PRKCZ/CSPG5/POSTN
BP	GO:0044106	cellular amine metabolic process	133	0.527092	1.54902	0.00233338	0.0746082	0.0686183	966	tags=26%, list=8%, signal=24%	TPH1/INS/PSMC4/PSMD14/PSMD2/PSMC3/PSMD6/PSMD1/PSMC5/PSMC2/PSMC1/PSMA3/PSMD7/PSMD13/PSMD8/PSMD4/PSMD3/ATP2B4/PSMB5/PSMA5/PSMC6/PSMB4/PSMD12/PSMB2/NR4A2/PSMD11/PSMB1/PSMA2/SRM/AMD1/PSMA1/DDC/ODC1/PSMA6
CC	GO:0005684	U2-type spliceosomal complex	86	0.581352	1.62914	0.00233498	0.0746082	0.0686183	3435	tags=40%, list=27%, signal=29%	PRPF8/SNRNP200/SNRPN/CCDC12/EIF4A3/PRPF31/SF3B3/SF3B2/EFTUD2/PPIL1/IK/PRPF19/SNRPG/SF3B1/PRPF38A/SNRPB2/AQR/SNRPF/SNRNP70/LSM6/LSM5/CRNKL1/SNU13/SNRPE/RNF113A/DHX16/PRPF3/SF3A1/SF3A3/SNRNP40/SNRPD2/PRPF39/SNRPD1/MAGOHB
BP	GO:0036294	cellular response to decreased oxygen levels	175	0.492421	1.49361	0.00237761	0.0748821	0.0688702	671	tags=19%, list=5%, signal=19%	PSMC4/HYOU1/PSMD14/PSMD2/PSMC3/PSMD6/PSMD1/PSMC5/PSMC2/PSMC1/PSMA3/TSC1/PSMD7/PSMD13/PSMD8/PSMD4/PSMD3/PSMB5/PSMA5/ARNT/PTGIS/PSMC6/CHCHD2/PSMB4/ACAA2/PSMD12/PSMB2/OPA1/PSMD11/IRAK1/PSMB1/PSMA2/AQP3/TBL2
BP	GO:0090114	COPII-coated vesicle budding	66	0.638244	1.71537	0.0024018	0.0748821	0.0688702	1920	tags=36%, list=15%, signal=31%	SEC24D/SEC16A/PREB/PDCD6/TMED10/SEC16B/SEC13/SCFD1/LMAN1/SEC22B/SEC31A/TMED2/NSF/GOLGA2/SEC23B/RAB1B/USO1/PEF1/RAB1A/SEC24A/BET1/VAPB/GOSR2/TFG
MF	GO:0051010	microtubule plus-end binding	19	0.826369	1.72794	0.00241248	0.0748821	0.0688702	1234	tags=32%, list=10%, signal=29%	MAPRE1/APC/DST/MAPRE2/DCTN1/CLIP1
CC	GO:0030176	integral component of endoplasmic reticulum membrane	122	0.535352	1.55744	0.00241846	0.0748821	0.0688702	1233	tags=24%, list=10%, signal=22%	DERL2/DOLPP1/HM13/DERL1/SLC37A1/SYVN1/PREB/SLC35B1/DPM3/CALR/SLC35B4/CANX/HSPA5/PIGG/SEC61A1/ERGIC1/EDEM1/TBL2/PORCN/ERGIC3/TRAM1/TMCO1/SLC37A3/EMC4/SPCS1/SEC62/RRBP1/ERN1/DPAGT1
BP	GO:0006605	protein targeting	375	0.419759	1.36341	0.00241944	0.0748821	0.0688702	1227	tags=14%, list=10%, signal=13%	HSPD1/NAGPA/NUDT19/PMPCB/SGTA/HAX1/SEC61B/HSP90AA1/SRPRA/VPS13D/SEC61G/SSR1/SRPRB/PITRM1/RPL5/TRAK2/SAE1/HSPA5/PEX10/VPS13C/LRRK2/SRP9/SSR3/SEC61A1/HSPA4/FBXW7/EDEM1/LMAN1/VPS13A/SRP19/SRP72/MIPEP/SSR2/TRAM1/TSPO/SRP14/SRP54/CHM/TOMM20/CDC37/MFN2/SPCS2/SPCS1/ATG13/SEC62/RPS5/AP4S1/AGPS/TIMM8B/YIF1B/SYNGR1
BP	GO:0006901	vesicle coating	65	0.642044	1.72024	0.002422	0.0748821	0.0688702	1920	tags=38%, list=15%, signal=33%	SEC24D/SEC16A/PREB/PDCD6/TMED10/SEC16B/SEC13/SCFD1/LMAN1/SEC22B/SEC31A/TMED2/NSF/GOLGA2/TMED9/RAB1B/USO1/ARFGAP2/GBF1/PEF1/RAB1A/SEC24A/BET1/GOSR2/TFG
BP	GO:0010565	regulation of cellular ketone metabolic process	145	0.522481	1.55707	0.00242392	0.0748821	0.0688702	1025	tags=25%, list=8%, signal=23%	INS/PSMC4/PSMD14/PSMD2/IL1B/PSMC3/PSMD6/PSMD1/PSMC5/PSMC2/PSMC1/PSMA3/PSMD7/PSMD13/PSMD8/PSMD4/EIF6/PSMD3/ATP2B4/PSMB5/PSMA5/PRKAG2/PSMC6/PSMB4/PSMD12/PSMB2/PSMD11/PSMB1/ABCD1/PSMA2/PSMA1/FGF19/ADIPOR1/ODC1/PSMA6/NR4A3
BP	GO:0002685	regulation of leukocyte migration	140	-0.644079	-1.64308	0.00243584	0.0748821	0.0688702	1380	tags=24%, list=11%, signal=21%	BMP5/CSF1R/AIF1/TIRAP/SMPD3/PLCB1/P2RY12/PTN/VEGFC/AKIRIN1/FPR2/CXCL12/CD200/SWAP70/CXCL10/CMKLR1/CD200R1/LYN/PGF/MMP14/MST1/KITLG/ST3GAL4/LGMN/ITGA2/S100A14/WNT5A/CXCL14/CCL25/CSF1/ECM1/CCR6/LBP
CC	GO:0043202	lysosomal lumen	84	-0.708776	-1.7019	0.00244707	0.0748821	0.0688702	1757	tags=38%, list=14%, signal=33%	GPC6/NPC2/CTSB/GUSB/CTSA/HEXB/GAA/ARSB/GLA/CTSS/CTSD/PLBD2/NCAN/GNS/APOB/VCAN/GM2A/PSAP/IDS/PPT1/SGSH/PRELP/LIPA/RNASET2/LGMN/CTSV/MAN2B1/ARSA/GLB1/CSPG5/DCN/LUM
BP	GO:0070585	protein localization to mitochondrion	113	0.551105	1.58574	0.00245407	0.0748821	0.0688702	2001	tags=23%, list=16%, signal=20%	HSPD1/PMPCB/HAX1/HSP90AA1/PITRM1/SAE1/LRRK2/HSPA4/FBXW7/COX18/LMAN1/MIPEP/TSPO/TOMM20/MFN2/ATG13/TIMM8B/HK2/SAMM50/PMPCA/BCS1L/IMMP1L/HUWE1/SH3GLB1/YWHAG/TIMM13
BP	GO:0042176	regulation of protein catabolic process	317	0.436816	1.39563	0.00245515	0.0748821	0.0688702	990	tags=13%, list=8%, signal=13%	INS/PSMC4/DESI1/IL10/PSMD14/PSMD2/RIC1/IL1B/SGTA/PSMC3/ANXA2/EGF/PSMD1/VIP/APC/ADGRB1/PSMC2/HSP90AA1/PSMC1/GJA1/UFL1/PSMD3/RPL5/SGSM3/HSPBP1/VCP/RAD23B/LRRK2/USP5/FBXW7/USP7/KLHL40/ALAD/ASB5/SEC22B/USP14/FURIN/DISC1/CDK5RAP3/ODC1/BAG5/N4BP1
MF	GO:0015036	disulfide oxidoreductase activity	35	0.728158	1.71546	0.00249698	0.0758444	0.0697553	2171	tags=46%, list=17%, signal=38%	PDIA6/ERO1B/PDIA4/TXNL1/DNAJC10/TXNRD2/TXNDC2/PDIA5/GFER/TXN2/TMX2/PDIA3/PGK1/ERO1A/TXN/GRXCR1
BP	GO:0002831	regulation of response to biotic stimulus	269	0.452705	1.4428	0.00256984	0.0777378	0.0714966	1104	tags=19%, list=9%, signal=17%	HSPD1/INS/PSMC4/PSMD14/PSMD2/RELB/PSMC3/PPM1B/PSMD6/PSMD1/ARG2/PSMC5/PSMC2/HSP90AA1/PSMC1/PSMA3/PSMD7/PSMD13/PSMD8/PSMD4/PSMD3/CLNK/NFKB1/PSMB5/PSMA5/MED1/IKBKE/PSMC6/PSMB4/SYT11/PSMD12/PSMB2/PSMD11/NPLOC4/DHX9/PSMB1/FBXO38/PSMA2/ABCE1/C1QBP/TAB1/PSMA1/CDC37/PSMA6/IKBKB/CR1/MAPKBP1/USP15/NOD1/PSMA4
BP	GO:1901136	carbohydrate derivative catabolic process	153	-0.617213	-1.59741	0.00258096	0.0777554	0.0715128	1553	tags=25%, list=12%, signal=22%	GNPDA1/GPC6/CDA/GUSB/AMPD3/HEXB/CST3/RENBP/ARSB/MAN1A1/GLA/PDE4A/NCAN/GNS/XDH/NT5M/VCAN/GM2A/IDS/GALT/CTBS/CHP1/PGLYRP1/SGSH/PRELP/NPL/GPD1/PDE8B/NT5C3A/HPSE2/CHIA/SPAM1/AMDHD2/GLB1/DPYD/CSPG5/DCN/LUM
CC	GO:0030137	COPI-coated vesicle	23	0.807841	1.77372	0.00264223	0.0792778	0.072913	1582	tags=61%, list=12%, signal=53%	TMED10/COPZ2/COPG2/SEC22B/TMED7/COPA/TMED2/COPE/KDELR2/COPZ1/ARCN1/SCYL1/COPB1/COPB2
BP	GO:0010499	proteasomal ubiquitin-independent protein catabolic process	19	0.823093	1.72108	0.00268819	0.0803299	0.0738807	1504	tags=68%, list=12%, signal=60%	PSMA3/PSMB5/PSMA5/PSMB4/PSMB2/PSMB1/PSMA2/PSMA1/PSMA6/PSMA4/PSMB3/PSMB7/PSME4
BP	GO:0035337	fatty-acyl-CoA metabolic process	35	-0.817951	-1.74578	0.00275088	0.0818721	0.0752991	884	tags=26%, list=7%, signal=24%	HACD2/CBR4/FASN/HSD17B4/PPT1/ACLY/DGAT2/ACSL5/SCD5
BP	GO:0002833	positive regulation of response to biotic stimulus	168	0.510105	1.5485	0.00282804	0.0833913	0.0766963	653	tags=20%, list=5%, signal=19%	HSPD1/PSMC4/PSMD14/PSMD2/RELB/PSMC3/PSMD6/PSMD1/PSMC5/PSMC2/HSP90AA1/PSMC1/PSMA3/PSMD7/PSMD13/PSMD8/PSMD4/PSMD3/CLNK/NFKB1/PSMB5/PSMA5/MED1/IKBKE/PSMC6/PSMB4/PSMD12/PSMB2/PSMD11/DHX9/PSMB1/FBXO38/PSMA2
BP	GO:0006413	translational initiation	171	0.494805	1.50139	0.00283131	0.0833913	0.0766963	3763	tags=50%, list=30%, signal=35%	UHMK1/EIF6/EIF1AD/RPL5/EIF2B1/HABP4/EIF4H/EIF4G1/EIF5B/TPR/ABCE1/DNAJC3/RBM4/IMPACT/LARP1/TMED2/EIF3C/GLE1/MTIF2/DENR/RPS5/CSDE1/DHX33/EIF2A/RPS9/EIF3E/EIF4G3/EIF4A1/RPS13/CDC123/NCBP2/EIF4B/DHX29/POLR2D/EIF5/RPL10/EIF3M/EIF3L/RPS21/EIF2S2/EIF4E/RPL35/RPL13/EIF1AX/RPS6/RPS23/RPS3/UBA52/RPL11/RPSA/RPS19/RPL14/RPS18/RPS26/RPS28/RPL28/EIF2D/RPS10/RPS7/RPL23A/EIF2S3/EIF3A/RPL21/RPS16/RPS27A/RPL37/RPL…
BP	GO:0007160	cell-matrix adhesion	185	-0.579473	-1.52405	0.00283583	0.0833913	0.0766963	2428	tags=30%, list=19%, signal=25%	IQGAP1/CD3E/CEACAM6/ADAMTS13/NPNT/RIN2/EPB41L5/LYVE1/CORO1C/DUSP3/DAG1/ANGPTL3/PEAK1/PXN/CORO2B/SERPINE1/COL16A1/EPHA3/ITGB1/ABL1/AJUBA/GPM6B/EPDR1/SRC/HOXD3/SGCE/WDPCP/PTK2B/FREM1/CDK6/OTOA/CDK5/ONECUT1/SMAD3/PLEKHA2/FAM107A/FN1/ITGA11/EMP2/PLAU/PIK3R1/NID1/VWA2/ACTN2/BCL6/PDPK1/DDR1/MMP14/NID2/ACER2/NRP1/ITGA2/CCL25/CSF1/PRKCZ/POSTN
BP	GO:0006903	vesicle targeting	87	0.585702	1.64942	0.00285446	0.0836061	0.0768938	1920	tags=34%, list=15%, signal=29%	SEC24D/FAM91A1/SEC16A/PREB/PDCD6/TMED10/SEC16B/TRIP11/SEC13/SCFD1/LMAN1/SEC22B/SEC31A/TMED2/NSF/GOLGA2/TMED9/RAB1B/USO1/ARFGAP2/AP1AR/GBF1/PEF1/RAB1A/SEC24A/BET1/WDR11/GOSR1/GOSR2/TFG
MF	GO:0005539	glycosaminoglycan binding	163	-0.615179	-1.5962	0.00287387	0.083842	0.0771108	1269	tags=23%, list=10%, signal=21%	F2/ZNF146/FN1/NCAN/LXN/PTN/GNS/FSTL1/TGFBR2/RSPO1/APOB/SELL/PCOLCE2/SERPINA10/VCAN/CXCL10/LIPH/LTF/PGF/NDNF/HABP2/PGLYRP1/APOE/SGSH/PRELP/SERPIND1/LAYN/COL11A1/SMOC1/HAPLN4/CRISPLD2/NRP1/ANOS1/NELL2/DCN/AOC1/F11/POSTN
BP	GO:0003013	circulatory system process	482	-0.495575	-1.39367	0.00288943	0.083964	0.077223	2123	tags=25%, list=17%, signal=22%	PIK3CG/CORO2B/HMOX1/SLC4A3/SREBF1/SLC7A8/PPARG/SLC1A2/ATP6AP2/ADORA2A/F2R/KCNE4/DSG2/CMA1/TNNC1/KCNJ2/TRDN/SLC22A5/PPCS/CTSG/ID2/ABCC5/MYH7/MYH6/NPR2/TNNI1/SRC/CXCR4/ADORA1/GATA4/GNAI2/ENPEP/MYL2/CACNG2/ADORA3/MYL1/SMAD5/SLC2A1/FGFBP3/RENBP/SOD1/TBX20/HBEGF/GAA/SMAD3/DSP/SLC16A7/FXYD3/HOXB2/ASIC2/MYL4/CACNA1S/TMEM38A/SLC1A5/CXADR/ABCG2/EPAS1/CRP/SLC29A1/TNNT2/SLC8A3/DLL1/CACNA1D/AGT/SLC1A4/SCPEP1…
BP	GO:0048199	vesicle targeting, to, from or within Golgi	69	0.621723	1.67593	0.00290512	0.084089	0.0773379	1920	tags=39%, list=15%, signal=33%	SEC24D/SEC16A/PREB/PDCD6/TMED10/SEC16B/SEC13/SCFD1/LMAN1/SEC22B/SEC31A/TMED2/NSF/GOLGA2/TMED9/RAB1B/USO1/ARFGAP2/AP1AR/GBF1/PEF1/RAB1A/SEC24A/BET1/GOSR1/GOSR2/TFG
MF	GO:0051787	misfolded protein binding	20	0.825577	1.75651	0.00294188	0.0848204	0.0780106	932	tags=55%, list=7%, signal=51%	SDF2L1/DNAJB11/DERL2/DERL1/SDF2/HSPA9/DNAJC10/HSPA5/EDEM1/DNAJC3/HSPA13
BP	GO:0071712	ER-associated misfolded protein catabolic process	11	0.89863	1.65346	0.00298754	0.0858016	0.0789131	438	tags=45%, list=3%, signal=44%	SDF2L1/DERL1/UGGT2/UGGT1/VCP
BP	GO:0051031	tRNA transport	33	0.754668	1.76597	0.00303818	0.0869178	0.0799397	2630	tags=61%, list=21%, signal=48%	NUP205/NUP35/SEC13/NUP210/NUP188/NUP107/TPR/TOMM20/NUP98/NUP155/NUP153/XPOT/NUP160/SSB/NUP85/NUP88/NUP133/RAN/NUP93/NUP54
BP	GO:0006631	fatty acid metabolic process	279	-0.552937	-1.50741	0.00311661	0.0888172	0.0816866	1180	tags=17%, list=9%, signal=16%	ACOT8/SLC27A6/PTGES/HACD2/FAAH2/CYP2U1/NCOR1/APOA1/GGT1/CBR4/FASN/HSD17B4/ADH5/GNPAT/MAPK14/CES2/ALOX15B/PON2/LIPH/PM20D1/PLA2G3/GSTZ1/ACLY/EHHADH/ASAH2/APOC2/PEX2/CYP4V2/MSMO1/TBXAS1/PON3/SOX9/DGAT2/CAV1/ABCB11/AACS/GGT5/PLA2G15/CYP2J2/CYP1A1/ACSL5/CYP3A4/UCP3/PECR/ACSS2/FADS2/SCD5
BP	GO:0097502	mannosylation	27	0.783905	1.78626	0.00316634	0.089765	0.0825583	1094	tags=37%, list=9%, signal=34%	SDF2L1/POMT1/DPY19L3/DPM3/ALG12/DPM1/NUS1/ALG3/PIGB/ALG1
BP	GO:0006534	cysteine metabolic process	10	-0.91447	-1.59616	0.00317419	0.089765	0.0825583	340	tags=30%, list=3%, signal=29%	GGT1/CDO1/CSAD
CC	GO:0032040	small-subunit processome	34	0.722039	1.69439	0.00322967	0.0908487	0.083555	1872	tags=38%, list=15%, signal=33%	WDR36/PDCD11/WDR3/HEATR1/NOP14/FBL/UTP3/UTP20/PRKDC/EMG1/NOL10/KRR1/UTP18
BP	GO:1900034	regulation of cellular response to heat	69	0.618657	1.66767	0.00323712	0.0908487	0.083555	1571	tags=23%, list=12%, signal=20%	NUP205/HSP90AA1/NUP35/SEC13/NUP210/NUP188/NUP107/TPR/PTGES3/NUP98/BAG5/ATR/NUP155/DNAJC2/NUP153/HSF1
CC	GO:0030532	small nuclear ribonucleoprotein complex	65	0.635144	1.70176	0.0032728	0.0915021	0.0841559	3386	tags=45%, list=27%, signal=33%	LSM10/PRPF8/SNRNP200/SNRPN/PRPF31/SF3B3/SF3B2/EFTUD2/SNRPG/SF3B1/SNRPA/SNRPB2/LSM11/PPIH/SNRPF/SNRNP70/LSM6/LSM5/SNU13/SNRPE/PRPF3/SF3A1/DDX39B/SF3A3/DDX23/SNRNP40/SNRPD2/PRPF39/SNRPD1
BP	GO:0071560	cellular response to transforming growth factor beta stimulus	199	-0.57697	-1.52565	0.0032947	0.0917666	0.0843992	1570	tags=16%, list=12%, signal=14%	SOX11/SMAD5/SMAD1/ONECUT1/CDKN2B/SMAD3/NODAL/JUN/CFLAR/ZFP36L2/SMAD6/FLCN/F11R/LOX/TGFBR2/NOX4/PDPK1/PBLD/CITED1/GDF10/PARD6A/COL1A1/CAV2/COL1A2/SOX9/CAV1/SMAD9/WNT5A/HTRA3/PRKCZ/HTRA1/POSTN
CC	GO:0000315	organellar large ribosomal subunit	50	0.668493	1.7005	0.00338177	0.0934864	0.0859809	3276	tags=52%, list=26%, signal=39%	MRPL9/MRPL4/MRPL24/MRPL57/MRPL41/MRPL46/MRPL22/MRPL53/MRPL40/MRPL32/MRPL37/MRPL54/MRPL34/MRPL43/MRPL15/MRPL38/MRPL51/MALSU1/MRPL12/MRPL17/NDUFAB1/MRPL14/MRPS30/MRPL13/MRPL21/MRPL19
CC	GO:0005762	mitochondrial large ribosomal subunit	50	0.668493	1.7005	0.00338177	0.0934864	0.0859809	3276	tags=52%, list=26%, signal=39%	MRPL9/MRPL4/MRPL24/MRPL57/MRPL41/MRPL46/MRPL22/MRPL53/MRPL40/MRPL32/MRPL37/MRPL54/MRPL34/MRPL43/MRPL15/MRPL38/MRPL51/MALSU1/MRPL12/MRPL17/NDUFAB1/MRPL14/MRPS30/MRPL13/MRPL21/MRPL19
BP	GO:0019080	viral gene expression	181	0.491744	1.50051	0.0034189	0.0941602	0.0866006	3761	tags=46%, list=30%, signal=33%	NUP205/PSMC3/NUP35/RPL5/SEC13/NUP210/NUP188/DHX9/NUP107/TPR/FURIN/NUP98/RSF1/SPCS1/DENR/RPS5/SMARCA4/CSDE1/NUP155/NUP153/RPS9/RPS13/POLR2D/RPL10/NUP160/EIF3L/SSB/NUP85/NUP88/RPS21/INPP5K/SUPT5H/RPL35/NUP133/SMARCB1/RPL13/NUP93/NUP54/RPS6/RPS23/RPS3/UBA52/RPL11/RPSA/RPS19/MDFIC/RPL14/POLR2L/AAAS/RPS18/TRIM62/RPS26/RPS28/RPL28/EIF2D/RPS10/RPS7/RPL23A/CCL3/EIF3A/RPL21/RPS16/RPS27A/RAE1/RPL37/RPL15/R…
BP	GO:0008202	steroid metabolic process	233	-0.572289	-1.53481	0.00346624	0.0951089	0.0874731	1594	tags=24%, list=13%, signal=22%	APOA4/EBP/SDR42E1/SLC27A2/SEC14L2/SOD1/BMP5/VLDLR/LAMTOR1/DHCR24/ACOT8/AGT/UGT2A2/CYP27B1/CYP19A1/CYB5R3/ATP8B1/APOA1/APOB/FASN/HSD17B4/FMO5/RORA/RDH16/PRLR/CYP51A1/CYP46A1/HMGCR/CYP27A1/TM7SF2/APOE/ACLY/CLCN2/LIPA/LSS/CYP4V2/NR1I2/NR0B2/NR0B1/MSMO1/IDI1/HSD17B7/DHCR7/CYP2R1/CYB5R2/LCAT/LGMN/DGAT2/SQLE/ABCB11/SC5D/HSD3B1/RDH8/CYP1A1/MALRD1/CYP3A4/HSD11B2
CC	GO:0030134	COPII-coated ER to Golgi transport vesicle	73	0.582167	1.58198	0.00350051	0.0956935	0.0880108	1468	tags=33%, list=12%, signal=29%	SEC24D/SEC16A/YIF1A/PDCD6/YIPF5/TMED10/SEC16B/SEC13/ERGIC1/LMAN1/SEC22B/TMED7/SEC31A/ERGIC3/TMED4/TMED2/LMAN2L/ERGIC2/YIF1B/GOLGA2/SEC23B/TMED9/USO1/PEF1
BP	GO:0048207	vesicle targeting, rough ER to cis-Golgi	61	0.637923	1.68499	0.00362536	0.0980528	0.0901807	1920	tags=36%, list=15%, signal=31%	SEC24D/SEC16A/PREB/PDCD6/TMED10/SEC16B/SEC13/SCFD1/LMAN1/SEC22B/SEC31A/TMED2/NSF/GOLGA2/RAB1B/USO1/PEF1/RAB1A/SEC24A/BET1/GOSR2/TFG
BP	GO:0048208	COPII vesicle coating	61	0.637923	1.68499	0.00362536	0.0980528	0.0901807	1920	tags=36%, list=15%, signal=31%	SEC24D/SEC16A/PREB/PDCD6/TMED10/SEC16B/SEC13/SCFD1/LMAN1/SEC22B/SEC31A/TMED2/NSF/GOLGA2/RAB1B/USO1/PEF1/RAB1A/SEC24A/BET1/GOSR2/TFG
BP	GO:0071559	response to transforming growth factor beta	205	-0.575587	-1.52753	0.00362666	0.0980528	0.0901807	1667	tags=17%, list=13%, signal=15%	ZFHX3/SIRT1/SOX11/SMAD5/SMAD1/ONECUT1/CDKN2B/SMAD3/NODAL/JUN/CFLAR/ZFP36L2/SMAD6/FLCN/RUNX3/F11R/LOX/TGFBR2/NOX4/PDPK1/PBLD/CITED1/GDF10/PARD6A/COL1A1/CAV2/COL1A2/SOX9/CAV1/SMAD9/WNT5A/HTRA3/PRKCZ/HTRA1/POSTN
BP	GO:0072655	establishment of protein localization to mitochondrion	111	0.552173	1.5773	0.00369165	0.0991624	0.0912012	2001	tags=23%, list=16%, signal=20%	HSPD1/PMPCB/HAX1/HSP90AA1/PITRM1/SAE1/LRRK2/HSPA4/FBXW7/COX18/LMAN1/MIPEP/TSPO/TOMM20/MFN2/ATG13/TIMM8B/HK2/SAMM50/PMPCA/BCS1L/IMMP1L/HUWE1/SH3GLB1/YWHAG/TIMM13
BP	GO:0000723	telomere maintenance	131	0.523762	1.52746	0.00370575	0.0991624	0.0912012	2613	tags=31%, list=21%, signal=25%	TEP1/XRN1/HSP90AA1/CCT3/CCT6A/USP7/CCT4/PRKCQ/TEN1/PTGES3/RIF1/HNRNPD/CCT8/ATR/SMG1/RFC1/UPF1/NHP2/RAD51C/HNRNPU/CCT7/RAD51/CCT5/TELO2/PRKDC/TERF2IP/YLPM1/HNRNPA1/RFC3/PNKP/ERCC4/TNKS/SP100/NAT10/PRIM2/NEK7/RPA2/PINX1/TCP1/DHX36
BP	GO:0031589	cell-substrate adhesion	297	-0.537862	-1.46949	0.00370801	0.0991624	0.0912012	2537	tags=30%, list=20%, signal=25%	IQGAP1/CRKL/CD3E/CEACAM6/HSD17B12/ATXN3/ADAMTS13/NPNT/RIN2/EPB41L5/NEDD9/LYVE1/CORO1C/PREX1/DUSP3/DAG1/ANGPTL3/PEAK1/PXN/CORO2B/SERPINE1/COL16A1/RAC2/EPHA3/ITGB1/ABL1/AJUBA/GPM6B/TYRO3/EPDR1/KIF14/ITGA6/SRC/EPHB3/HOXD3/SGCE/WDPCP/MERTK/SPOCK2/PTK2B/FREM1/FBLN1/CDK6/OTOA/CDK5/ONECUT1/SMAD3/EGFL6/PLEKHA2/FAM107A/SMAD6/RAC3/TACSTD2/FN1/MICALL2/ITGA11/USH2A/PTN/APOA1/EMP2/FZD7/TRIOBP/PLAU/PIK3R1/NID1…
BP	GO:0045898	regulation of RNA polymerase II transcription preinitiation complex assembly	12	0.879353	1.64028	0.0037496	0.0999125	0.0918911	695	tags=50%, list=5%, signal=47%	PSMC4/PSMC3/PSMC5/PSMC2/PSMC6/ESR1
BP	GO:0035567	non-canonical Wnt signaling pathway	134	0.530145	1.55827	0.00377214	0.100152	0.092111	1174	tags=25%, list=9%, signal=23%	PSMC4/PSMD14/PSMD2/PSMC3/AGO1/PSMD6/PSMD1/PSMC5/PSMC2/PSMC1/PSMA3/PSMD7/PSMD13/PSMD8/PSMD4/PSMD3/VANGL1/PSMB5/PSMA5/PSMC6/PSMB4/PSMD12/PSMB2/PSMD11/PSMB1/PSMA2/PSMA1/PSMA6/FRZB/CLTC/ROR2/PSMA4/PPP3CA
BP	GO:0045088	regulation of innate immune response	213	0.455116	1.41056	0.00380672	0.100707	0.0926222	1012	tags=18%, list=8%, signal=17%	INS/PSMC4/PSMD14/PSMD2/RELB/PSMC3/PSMD6/PSMD1/PSMC5/PSMC2/HSP90AA1/PSMC1/PSMA3/PSMD7/PSMD13/PSMD8/PSMD4/PSMD3/CLNK/NFKB1/PSMB5/PSMA5/MED1/IKBKE/PSMC6/PSMB4/PSMD12/PSMB2/PSMD11/DHX9/PSMB1/PSMA2/ABCE1/TAB1/PSMA1/CDC37/PSMA6/IKBKB/CR1
BP	GO:0006575	cellular modified amino acid metabolic process	140	-0.629936	-1.607	0.00388109	0.102308	0.0940945	1595	tags=22%, list=13%, signal=20%	SERINC5/FOLR2/SOD1/PLA2G4A/PARK7/PLA1A/OPLAH/ALDH4A1/PDZD11/GSTT2B/GOT2/DPEP1/GDAP1/CKM/CHDH/GGT1/GATA3/IYD/HPN/PLA2G3/GSTZ1/GSTA4/GCH1/PRODH/GGT5/PLA2G15/BHMT/LPCAT4/SLC16A10/GATM/DIO1
BP	GO:0006110	regulation of glycolytic process	67	0.617874	1.65912	0.00397598	0.104437	0.0960521	1370	tags=24%, list=11%, signal=21%	INS/JMJD8/NUP205/NUP35/EIF6/ARNT/PRKAG2/SEC13/NUP210/NUP188/NUP107/TPR/NUP98/HDAC4/NUP155/NUP153
BP	GO:0030490	maturation of SSU-rRNA	47	0.666147	1.67749	0.00402753	0.105416	0.0969524	3311	tags=55%, list=26%, signal=41%	WDR3/HEATR1/RIOK1/NOP14/BMS1/RIOK3/UTP3/BYSL/UTP20/RRS1/RRP36/NOL10/KRI1/LSM6/NAT10/RPS21/GTF2H5/ERCC2/ABT1/SNU13/TSR2/RPS19/RPS28/NOP9/RPS16/WDR46
BP	GO:0006694	steroid biosynthetic process	146	-0.618234	-1.58314	0.00406671	0.106065	0.0975496	1650	tags=29%, list=13%, signal=26%	SIRT1/APOA4/EBP/SDR42E1/SLC27A2/SEC14L2/SOD1/BMP5/DHCR24/ACOT8/CYP27B1/CYP19A1/CYB5R3/APOA1/APOB/FASN/HSD17B4/PRLR/CYP51A1/CYP46A1/HMGCR/CYP27A1/TM7SF2/APOE/ACLY/CLCN2/LSS/NR0B1/MSMO1/IDI1/HSD17B7/DHCR7/CYP2R1/CYB5R2/SQLE/ABCB11/SC5D/HSD3B1/RDH8/CYP1A1/MALRD1/CYP3A4/HSD11B2
BP	GO:0050921	positive regulation of chemotaxis	106	-0.669027	-1.64045	0.00412378	0.106904	0.0983211	1732	tags=27%, list=14%, signal=24%	C5AR1/CXCR4/ADAM10/PTK2B/SMAD3/CSF1R/AIF1/TIRAP/P2RY12/PTN/VEGFC/AKIRIN1/FPR2/CXCL12/SWAP70/CXCL10/CMKLR1/DSCAM/PGF/LGMN/NTF3/NRP1/ITGA2/S100A14/WNT5A/CXCL14/CSF1/CCR6/LBP
BP	GO:0001738	morphogenesis of a polarized epithelium	127	0.521764	1.51849	0.00412784	0.106904	0.0983211	1104	tags=25%, list=9%, signal=23%	PSMC4/PSMD14/PSMD2/PSMC3/PSMD6/PSMD1/PSMC5/PSMC2/PSMC1/PSMA3/PSMD7/PSMD13/PSMD8/PSMD4/PSMD3/VANGL1/PSMB5/PSMA5/PSMC6/PSMB4/PSMD12/PSMB2/PSMD11/PSMB1/PSMA2/NPHP1/PSMA1/PSMA6/CLTC/ROR2/SCRIB/PSMA4
MF	GO:0030021	extracellular matrix structural constituent conferring compression resistance	14	-0.910351	-1.65828	0.0041544	0.107075	0.0984781	681	tags=36%, list=5%, signal=34%	VCAN/PRELP/PODN/DCN/LUM
BP	GO:0061077	chaperone-mediated protein folding	48	0.669701	1.68486	0.00416345	0.107075	0.0984781	954	tags=21%, list=8%, signal=19%	SDF2L1/P3H1/SGTA/SDF2/PDIA4/HSPA9/HSPA5/PTGES3/HSPA13/TRAP1
BP	GO:0060325	face morphogenesis	27	-0.85625	-1.75847	0.00418529	0.107147	0.0985444	460	tags=26%, list=4%, signal=25%	MYH3/CSRNP1/COL1A1/CRISPLD1/CRISPLD2/MSX1/MMP2
BP	GO:0035774	positive regulation of insulin secretion involved in cellular response to glucose stimulus	25	0.772455	1.7284	0.00420052	0.107147	0.0985444	247	tags=16%, list=2%, signal=16%	RFX6/GCG/CFTR/PDX1
BP	GO:0002688	regulation of leukocyte chemotaxis	81	-0.680229	-1.62069	0.0042098	0.107147	0.0985444	998	tags=26%, list=8%, signal=24%	CSF1R/AIF1/TIRAP/PTN/VEGFC/AKIRIN1/FPR2/CXCL12/SWAP70/CXCL10/CMKLR1/LYN/PGF/MST1/LGMN/S100A14/WNT5A/CXCL14/CSF1/CCR6/LBP
BP	GO:0038063	collagen-activated tyrosine kinase receptor signaling pathway	10	-0.901667	-1.57381	0.00435132	0.110368	0.101507	645	tags=40%, list=5%, signal=38%	OTOL1/DDR1/COL1A1/MUSK
BP	GO:0090596	sensory organ morphogenesis	203	-0.584035	-1.54878	0.00441463	0.11159	0.102631	2067	tags=27%, list=16%, signal=23%	OLFM3/KDM2B/PLS1/IFT172/WNT2B/BMP7/SLC44A4/TBX1/COL2A1/MAFB/USH1C/AHI1/WDPCP/SOBP/SOX11/YY1/HOXA2/SOD1/BAX/FRS2/DLL1/SLC9A3R1/RBP4/PTN/PDE6C/HESX1/GATA2/TRIOBP/GATA3/PRRX1/FGF8/IGFN1/FZD2/TSHZ1/NKX3-2/CRB2/RORB/FOXI1/DSCAM/C12orf57/HPN/MYO7A/BCAR3/SDK1/COL11A1/INTU/GNGT1/SOX9/MFAP2/WNT5A/LHX1/CTHRC1/MSX1/VSX1/COL8A2
BP	GO:0071806	protein transmembrane transport	52	0.64137	1.64279	0.00444688	0.112022	0.103028	1134	tags=21%, list=9%, signal=19%	HSPD1/SEC61B/TMED10/SEC61G/HSPA5/PEX10/SEC61A1/TRAM1/SRP54/TOMM20/SEC62
BP	GO:0035269	protein O-linked mannosylation	14	0.87143	1.69382	0.00446681	0.112141	0.103138	612	tags=29%, list=5%, signal=27%	SDF2L1/POMT1/DPM3/DPM1
BP	GO:0060324	face development	40	-0.780712	-1.71331	0.00450738	0.112754	0.103702	460	tags=22%, list=4%, signal=22%	MYH3/CSRNP1/COL1A1/CRISPLD1/CRISPLD2/WNT5A/MSX1/MAP2K1/MMP2
BP	GO:0048311	mitochondrion distribution	15	0.849033	1.66917	0.00452178	0.112754	0.103702	894	tags=33%, list=7%, signal=31%	MSTO1/TRAK2/OPA1/LRRK2/ARMC1
CC	GO:0030133	transport vesicle	317	0.427263	1.36511	0.00455705	0.113173	0.104087	1896	tags=26%, list=15%, signal=23%	PCSK2/INS/PCSK1/SCG3/SYN2/SEC24D/SEC16A/CPLX3/CLTB/PDCD6/CYB561/SURF4/TMED10/SEC16B/ARFGEF3/TRIP11/COPZ2/SYTL5/COPG2/OTOF/SEC13/STX12/SYT11/MAP6/SNTB2/LRRK2/AP1G2/RAB27B/PLEKHF2/MCTP2/LMAN1/SYNDIG1/COPS4/SEC22B/RAB6A/PTPRN2/TMED7/SEC31A/YIPF1/DMXL2/FURIN/COPA/TMED2/SV2A/DISC1/COPE/KDELR2/UNC13A/DDC/COPZ1/CLTC/RABEPK/SYNGR1/MME/ICA1/SYT3/SYNRG/ARCN1/SEC23B/TMED9/RAB1B/RAB14/SYT9/USO1/AP1AR/DOC2A/P…
BP	GO:0071772	response to BMP	127	-0.639252	-1.60512	0.00458457	0.113173	0.104087	1687	tags=31%, list=13%, signal=27%	FBXL15/SMAD7/NOG/PPARG/PDCD4/ABL1/BMP7/COL2A1/GATA4/SPINT1/SOX11/SMAD5/SMAD1/SMAD3/NODAL/SFRP5/BMP5/TMEM100/SMPD3/SMAD6/FSTL1/GATA3/CRB2/BMPR1B/VWC2L/SFRP2/HOXA13/HES1/TNMD/ADAMTS7/SOX9/SMAD9/VSTM2A/WNT5A/SOSTDC1/HTRA3/MSX1/HTRA1/AMH
BP	GO:0071773	cellular response to BMP stimulus	127	-0.639252	-1.60512	0.00458457	0.113173	0.104087	1687	tags=31%, list=13%, signal=27%	FBXL15/SMAD7/NOG/PPARG/PDCD4/ABL1/BMP7/COL2A1/GATA4/SPINT1/SOX11/SMAD5/SMAD1/SMAD3/NODAL/SFRP5/BMP5/TMEM100/SMPD3/SMAD6/FSTL1/GATA3/CRB2/BMPR1B/VWC2L/SFRP2/HOXA13/HES1/TNMD/ADAMTS7/SOX9/SMAD9/VSTM2A/WNT5A/SOSTDC1/HTRA3/MSX1/HTRA1/AMH
BP	GO:0006388	tRNA splicing, via endonucleolytic cleavage and ligation	14	0.868247	1.68763	0.00472701	0.1163	0.106963	550	tags=14%, list=4%, signal=14%	TSEN15/RTCB
BP	GO:0034308	primary alcohol metabolic process	61	-0.738997	-1.69085	0.00476883	0.116939	0.107551	1420	tags=31%, list=11%, signal=28%	TTR/PARK7/BMP5/RBP4/CBR4/ADH5/LRAT/RDH16/RDH11/CLCN2/GPD1/DGAT2/DHRS3/RDH8/CYP1A1/CYP3A4/PECR/GDPD3/ACSS2
BP	GO:1903362	regulation of cellular protein catabolic process	203	0.45166	1.38819	0.00485128	0.118506	0.108992	990	tags=14%, list=8%, signal=13%	PSMC4/DESI1/PSMD14/RIC1/SGTA/PSMC3/ANXA2/EGF/PSMC2/HSP90AA1/PSMC1/UFL1/RPL5/HSPBP1/VCP/RAD23B/LRRK2/USP5/FBXW7/USP7/KLHL40/ALAD/USP14/FURIN/DISC1/CDK5RAP3/BAG5/N4BP1
BP	GO:0006278	RNA-dependent DNA biosynthetic process	62	0.615508	1.63571	0.00486483	0.118506	0.108992	1845	tags=31%, list=15%, signal=26%	TEP1/XRN1/HSP90AA1/CCT3/CCT6A/CCT4/PRKCQ/TEN1/PTGES3/CCT8/ATR/RFC1/NHP2/HNRNPU/CCT7/CCT5/TELO2/TERF2IP/HNRNPA1
BP	GO:0044344	cellular response to fibroblast growth factor stimulus	116	-0.644638	-1.59587	0.00496428	0.120451	0.110781	807	tags=9%, list=6%, signal=9%	GATA3/DLL4/FGF8/CPS1/NDNF/COL1A1/ANOS1/WNT5A/LHX1/LRIT3/POSTN
CC	GO:0030658	transport vesicle membrane	163	0.491245	1.49222	0.00497731	0.120451	0.110781	1468	tags=25%, list=12%, signal=22%	SCG3/SYN2/SEC24D/SEC16A/CPLX3/CLTB/PDCD6/CYB561/TMED10/SEC16B/ARFGEF3/OTOF/SEC13/STX12/MAP6/SNTB2/LRRK2/AP1G2/RAB27B/MCTP2/LMAN1/SYNDIG1/SEC22B/PTPRN2/TMED7/SEC31A/DMXL2/TMED2/SV2A/UNC13A/CLTC/SYNGR1/ICA1/SYT3/SYNRG/SEC23B/SYT9/USO1/DOC2A/PEF1
CC	GO:0008250	oligosaccharyltransferase complex	12	0.87128	1.62522	0.00503854	0.121534	0.111777	1647	tags=100%, list=13%, signal=87%	STT3B/MAGT1/OST4/TUSC3/STT3A/KRTCAP2/DDOST/RPN2/TMEM258/DAD1/OSTC/RPN1
BP	GO:0000098	sulfur amino acid catabolic process	12	-0.889502	-1.59149	0.00514737	0.12375	0.113814	340	tags=17%, list=3%, signal=16%	CDO1/CSAD
BP	GO:0071456	cellular response to hypoxia	167	0.488597	1.4817	0.00516392	0.12375	0.113814	671	tags=20%, list=5%, signal=19%	PSMC4/HYOU1/PSMD14/PSMD2/PSMC3/PSMD6/PSMD1/PSMC5/PSMC2/PSMC1/PSMA3/PSMD7/PSMD13/PSMD8/PSMD4/PSMD3/PSMB5/PSMA5/ARNT/PTGIS/PSMC6/CHCHD2/PSMB4/ACAA2/PSMD12/PSMB2/OPA1/PSMD11/IRAK1/PSMB1/PSMA2/AQP3/TBL2
MF	GO:0005518	collagen binding	60	-0.729948	-1.6661	0.0052063	0.123989	0.114034	1434	tags=43%, list=11%, signal=39%	SMAD3/ADGRG6/CTSS/FN1/MRC2/ITGA11/USH2A/LOX/NID1/ANTXR1/PCOLCE2/SPARC/TGFBI/DDR1/PDGFA/NID2/COL6A1/SERPINH1/AEBP1/ITGA2/COCH/PODN/COL6A2/DCN/LUM/MUSK
BP	GO:0045089	positive regulation of innate immune response	153	0.497947	1.49578	0.00521971	0.123989	0.114034	653	tags=20%, list=5%, signal=19%	PSMC4/PSMD14/PSMD2/RELB/PSMC3/PSMD6/PSMD1/PSMC5/PSMC2/HSP90AA1/PSMC1/PSMA3/PSMD7/PSMD13/PSMD8/PSMD4/PSMD3/CLNK/NFKB1/PSMB5/PSMA5/MED1/IKBKE/PSMC6/PSMB4/PSMD12/PSMB2/PSMD11/DHX9/PSMB1/PSMA2
BP	GO:0065002	intracellular protein transmembrane transport	44	0.678344	1.69678	0.00522429	0.123989	0.114034	1134	tags=23%, list=9%, signal=21%	HSPD1/SEC61B/SEC61G/HSPA5/PEX10/SEC61A1/TRAM1/SRP54/TOMM20/SEC62
BP	GO:0071453	cellular response to oxygen levels	190	0.471368	1.44047	0.00528178	0.124951	0.11492	671	tags=18%, list=5%, signal=17%	PSMC4/HYOU1/PSMD14/PSMD2/PSMC3/PSMD6/PSMD1/PSMC5/PSMC2/PSMC1/PSMA3/TSC1/PSMD7/PSMD13/PSMD8/PSMD4/PSMD3/PSMB5/PSMA5/ARNT/PTGIS/PSMC6/CHCHD2/PSMB4/ACAA2/PSMD12/PSMB2/OPA1/PSMD11/IRAK1/PSMB1/PSMA2/AQP3/TBL2
BP	GO:0006283	transcription-coupled nucleotide-excision repair	68	0.599285	1.6094	0.00548343	0.129035	0.118675	2963	tags=34%, list=23%, signal=26%	CCNH/USP7/COPS4/MNAT1/COPS8/ERCC6/RFC1/RBX1/PRPF19/GTF2H3/AQR/POLR2D/RFC3/COPS3/ERCC4/GTF2H5/ERCC2/RPA2/COPS6/UBA52/RFC2/DDB1/POLR2L
MF	GO:0008135	translation factor activity, RNA binding	71	0.597387	1.61447	0.00548935	0.129035	0.118675	2335	tags=41%, list=18%, signal=34%	GCN1/EIF6/EIF1AD/EIF2B1/EIF4H/EIF4G1/EIF5B/GFM1/TUFM/EIF3C/EEF1G/MTIF2/DENR/CPEB2/EIF2A/GSPT1/EIF3E/ABCF1/EIF4G3/EIF4A1/EIF4B/MTRF1/DHX29/EIF5/EIF3M/EIF3L/ETF1/EIF2S2/EIF4E
MF	GO:0015116	sulfate transmembrane transporter activity	10	-0.891178	-1.5555	0.0055291	0.129146	0.118778	273	tags=20%, list=2%, signal=20%	SLC25A30/SLC13A4
BP	GO:1902358	sulfate transmembrane transport	10	-0.891178	-1.5555	0.0055291	0.129146	0.118778	273	tags=20%, list=2%, signal=20%	SLC25A30/SLC13A4
BP	GO:0051131	chaperone-mediated protein complex assembly	19	0.799559	1.67187	0.00558763	0.130102	0.119657	1298	tags=26%, list=10%, signal=24%	HSPD1/HSP90AA1/HSPA4/PTGES3/PSMG2
BP	GO:0002687	positive regulation of leukocyte migration	89	-0.668327	-1.60543	0.00574696	0.133391	0.122682	1363	tags=30%, list=11%, signal=27%	C5AR1/ADAM10/PTK2B/JAM2/CSF1R/AIF1/TIRAP/P2RY12/PTN/VEGFC/AKIRIN1/FPR2/CXCL12/SWAP70/CXCL10/CMKLR1/PGF/MMP14/KITLG/LGMN/ITGA2/S100A14/WNT5A/CXCL14/CSF1/CCR6/LBP
CC	GO:0000314	organellar small ribosomal subunit	28	0.757035	1.73486	0.00588546	0.135612	0.124725	2625	tags=68%, list=21%, signal=54%	DAP3/MRPS22/MRPS18C/MRPS12/MRPS27/MRPS18B/MRPS26/MRPS21/MRPS31/MRPS5/MRPS35/MRPS2/MRPS34/MRPS16/MRPS33/MRPS7/MRPS6/MRPS36/MRPS10
CC	GO:0005763	mitochondrial small ribosomal subunit	28	0.757035	1.73486	0.00588546	0.135612	0.124725	2625	tags=68%, list=21%, signal=54%	DAP3/MRPS22/MRPS18C/MRPS12/MRPS27/MRPS18B/MRPS26/MRPS21/MRPS31/MRPS5/MRPS35/MRPS2/MRPS34/MRPS16/MRPS33/MRPS7/MRPS6/MRPS36/MRPS10
BP	GO:0060323	head morphogenesis	31	-0.811537	-1.6909	0.00591737	0.135612	0.124725	460	tags=23%, list=4%, signal=22%	MYH3/CSRNP1/COL1A1/CRISPLD1/CRISPLD2/MSX1/MMP2
BP	GO:0002523	leukocyte migration involved in inflammatory response	12	-0.886048	-1.58531	0.00592433	0.135612	0.124725	998	tags=33%, list=8%, signal=31%	PTN/TRIM55/CCR6/LBP
CC	GO:0031227	intrinsic component of endoplasmic reticulum membrane	126	0.531648	1.54822	0.00593454	0.135612	0.124725	1233	tags=24%, list=10%, signal=22%	DERL2/DOLPP1/HM13/DERL1/SLC37A1/SYVN1/PREB/SLC35B1/DPM3/CALR/SLC35B4/CANX/HSPA5/PIGG/SEC61A1/ERGIC1/EDEM1/TBL2/PORCN/ERGIC3/TRAM1/TMCO1/ESYT2/SLC37A3/EMC4/SPCS1/SEC62/RRBP1/ERN1/DPAGT1
BP	GO:0000375	RNA splicing, via transesterification reactions	306	0.419372	1.34561	0.00605877	0.138024	0.126943	2091	tags=20%, list=16%, signal=17%	KHDRBS3/WDR83/STRAP/PRPF8/PTBP2/RAVER2/SNRNP200/SNRPN/DHX9/MBNL2/YTHDC1/RBM41/CLNS1A/ELAVL1/RBM4/NOVA1/EIF4A3/RBM15/C1QBP/HNRNPD/NUP98/PRPF31/GEMIN6/PRMT7/SNRNP48/HNRNPH1/SF3B3/KHSRP/PUF60/NCL/PPIL3/USP4/TIA1/WDR77/RBM4B/SMN1/SF3B2/EFTUD2/SRSF4/PPIL1/HNRNPU/U2AF1L5/COIL/IK/PRPF19/SNRPG/SF3B1/WBP11/PRPF38A/SNRPA/SNRPB2/NCBP2/HNRNPA1/AQR/POLR2D/PPIH/HNRNPA0/SNRPF/SNRNP70/CPSF1/LSM6
MF	GO:0051087	chaperone binding	85	0.568792	1.58695	0.00609519	0.138426	0.127313	965	tags=20%, list=8%, signal=19%	HSPD1/SDF2L1/HYOU1/CFTR/SYVN1/TSC1/CALR/STIP1/DNAJC10/HSPA5/DNAJC1/DNAJC3/PTGES3/PFDN4/CDC37/VWF/BAG5
BP	GO:0007548	sex differentiation	200	-0.565824	-1.49576	0.00615457	0.139346	0.128159	1898	tags=22%, list=15%, signal=19%	TYRO3/COL9A3/HOXA9/ADCYAP1/SRC/GATA4/SIRT1/MERTK/KLHL10/SMAD5/WT1/SOD1/BAX/BRCA2/CYP19A1/RBP4/SEMA3A/GNRH1/TNFSF10/REN/HESX1/BOK/HSD17B4/GATA3/ARRB1/FGF8/BMPR1B/INHBB/FZD4/SFRP2/GAS2/TLR3/MMP14/NTRK1/SYCP2/KITLG/PGR/HOXA13/NR0B1/DMC1/SOX9/LHFPL2/WNT5A/LHX1/AMH
MF	GO:0045182	translation regulator activity	113	0.526737	1.51562	0.00623525	0.140741	0.129442	2335	tags=35%, list=18%, signal=29%	IGF2BP1/GCN1/EIF6/EIF1AD/EIF2B1/EIF4H/EIF4G1/EIF5B/GFM1/TUFM/LARP1/EIF4A3/C1QBP/EIF3C/EEF1G/MTIF2/DENR/CPEB2/NANOS1/EIF2A/SHMT1/RPS9/GSPT1/EIF3E/ABCF1/IGF2BP2/EIF4G3/EIF4A1/IGF2BP3/EIF4B/MTRF1/DHX29/EIF5/RPL10/IREB2/EIF3M/EIF3L/ETF1/EIF2S2/EIF4E
BP	GO:0061448	connective tissue development	197	-0.566168	-1.49455	0.00631552	0.142118	0.130709	1546	tags=21%, list=12%, signal=19%	PTHLH/SMAD5/SMAD1/WT1/SMAD3/HAND2/BMP5/CFLAR/SMPD3/PTH1R/RUNX3/WNT10B/LOX/EIF2AK3/TGFBR2/PRRX1/MAPK14/WNT5B/NKX3-2/BMPR1B/SFRP2/GPR4/KLF7/TGFBI/SNX19/COL1A1/SERPINH1/COL11A1/CHRDL2/TNMD/ADAMTS7/SOX9/DGAT2/AACS/WNT5A/MSX1/CSF1/ECM1/LUM/MATN3/OTOR
BP	GO:0002690	positive regulation of leukocyte chemotaxis	62	-0.717756	-1.64625	0.00645566	0.144831	0.133203	1363	tags=31%, list=11%, signal=27%	CSF1R/AIF1/TIRAP/PTN/VEGFC/AKIRIN1/FPR2/CXCL12/SWAP70/CXCL10/CMKLR1/PGF/LGMN/S100A14/WNT5A/CXCL14/CSF1/CCR6/LBP
CC	GO:0097525	spliceosomal snRNP complex	56	0.653962	1.71227	0.00652629	0.145971	0.134252	3386	tags=48%, list=27%, signal=36%	PRPF8/SNRNP200/SNRPN/PRPF31/SF3B3/SF3B2/EFTUD2/SNRPG/SF3B1/SNRPA/SNRPB2/PPIH/SNRPF/SNRNP70/LSM6/LSM5/SNU13/SNRPE/PRPF3/SF3A1/DDX39B/SF3A3/DDX23/SNRNP40/SNRPD2/PRPF39/SNRPD1
BP	GO:0034975	protein folding in endoplasmic reticulum	11	0.875143	1.61024	0.00667641	0.14873	0.136789	747	tags=64%, list=6%, signal=60%	ERO1B/HSP90B1/CALR/CANX/DNAJC10/HSPA5/DNAJC3
CC	GO:0071011	precatalytic spliceosome	51	0.62904	1.60981	0.00668991	0.14873	0.136789	3435	tags=47%, list=27%, signal=34%	PRPF8/SNRNP200/PRPF31/SF3B3/SF3B2/EFTUD2/IK/SNRPG/SF3B1/PRPF38A/SNRPB2/SNRPF/LSM6/LSM5/SNU13/SNRPE/RNF113A/DHX16/PRPF3/SF3A1/SF3A3/SNRPD2/SNRPD1/MAGOHB
MF	GO:0005126	cytokine receptor binding	137	-0.590668	-1.49621	0.00671568	0.148854	0.136903	1467	tags=25%, list=12%, signal=22%	DAB2IP/SMAD3/CFLAR/FRS2/SMAD6/TMBIM1/CADM4/TNFSF10/TGFBR2/CKLF/VEGFC/LTA/PIK3R1/GATA3/IL36G/CXCL12/TRAF2/PRLR/CXCL10/TNFSF13B/PGF/TLR5/NTRK1/KITLG/NTF3/S100A14/EPO/CXCL14/MSMP/CCL25/CSF1/ECM1/TNFSF12/AMH
BP	GO:0007007	inner mitochondrial membrane organization	28	0.751645	1.7225	0.00674673	0.149095	0.137125	1212	tags=29%, list=10%, signal=26%	ADCK1/HSPA9/DNAJC11/OPA1/SPG7/IMMT/GHITM/TIMM8B
BP	GO:0000387	spliceosomal snRNP assembly	36	0.694357	1.64676	0.0067847	0.149486	0.137485	2265	tags=42%, list=18%, signal=34%	STRAP/PRPF8/CLNS1A/PRPF31/GEMIN6/PRMT7/USP4/WDR77/SMN1/COIL/PRPF19/SNRPG/SNRPF/GEMIN8/PRMT5
BP	GO:0009101	glycoprotein biosynthetic process	253	0.434971	1.37788	0.00681965	0.149548	0.137542	1385	tags=22%, list=11%, signal=20%	NUDT14/B3GAT2/NAGPA/SDF2L1/DOLPP1/MOGS/POMT1/STT3B/DPY19L3/SOAT1/UGGT2/MAGT1/UGGT1/DPM3/TRIP11/GALNT9/PLOD3/MAN1B1/TRAK2/EOGT/OST4/GFPT1/ALG12/TUSC3/STT3A/DPM1/LMAN1/NECAB1/KRTCAP2/ALG5/DDOST/RPN2/ALG6/NUS1/B3GNT3/ALG3/MGAT4A/CHST11/PGM3/B3GNT7/ALG1/CCR7/PMM2/GALNT10/TMEM258/TMEM165/DPAGT1/GALNT5/DSEL/EXTL2/DAD1/OSTC/GOLGA2/FUT11/MUC6
CC	GO:0005844	polysome	62	0.605589	1.60935	0.00682805	0.149548	0.137542	1363	tags=26%, list=11%, signal=23%	AGO1/GCN1/NAA30/CALR/EIF4G1/DHX9/DIS3L2/RWDD1/VIM/IMPACT/LARP1/PSMA1/NAA35/PSMA6/HDLBP/LARP4B
BP	GO:0071774	response to fibroblast growth factor	120	-0.637397	-1.58357	0.00685736	0.149746	0.137724	807	tags=9%, list=6%, signal=9%	GATA3/DLL4/FGF8/CPS1/NDNF/COL1A1/ANOS1/WNT5A/LHX1/LRIT3/POSTN
BP	GO:0032787	monocarboxylic acid metabolic process	474	-0.490758	-1.37994	0.0068938	0.150098	0.138047	1190	tags=16%, list=9%, signal=15%	GAD1/ACOT8/CRABP1/SLC27A6/PTGES/UGT2A2/GOT2/SCPEP1/MRS2/HACD2/FAAH2/SLC4A1/ENO4/CYP2U1/ATP8B1/CKM/NCOR1/APOA1/ALDOA/GGT1/CBR4/FASN/DDIT4/HSD17B4/ADH5/GNPAT/MAPK14/GAPDH/CES2/ME2/ALOX15B/PON2/LIPH/HAL/PM20D1/CYP46A1/HAAO/CYP27A1/PLA2G3/AMDHD1/GSTZ1/ACMSD/ACLY/EHHADH/ASAH2/APOC2/SORD/PEX2/CYP4V2/ALDH8A1/GPD1/UROC1/MSMO1/TBXAS1/PON3/SOX9/DGAT2/CAV1/ENO3/PGM1/ABCB11/AACS/GGT5/PLA2G15/CYP2J2/CYP1A1/MA…
BP	GO:0032479	regulation of type I interferon production	95	0.541879	1.54857	0.00706284	0.15293	0.140652	620	tags=11%, list=5%, signal=10%	HSPD1/IL10/RELB/PPM1B/HSP90AA1/NFKB1/IKBKE/NPLOC4/IRAK1/DHX9
MF	GO:0017025	TBP-class protein binding	23	0.78276	1.71866	0.00706532	0.15293	0.140652	921	tags=26%, list=7%, signal=24%	PSMC5/PSMC2/PSMC1/ESR1/DRAP1/BRF1
BP	GO:0051272	positive regulation of cellular component movement	429	-0.497608	-1.38819	0.00711585	0.153373	0.141059	2406	tags=28%, list=19%, signal=23%	RIN2/F10/EPB41L5/NEDD9/PLCG2/DAPK2/DOCK4/PREX1/TCAF2/RHOB/IL1R1/GRN/FOXP1/SNAI2/ARF6/TACR3/ANGPTL3/TMSB4X/MOSPD2/PIK3CG/CCL20/HMOX1/SERPINE1/ACKR3/RAC2/RAB25/F2R/MAZ/ITGB1/PLPP3/FGF1/TNFRSF14/ABL1/BMP7/ANGPT4/PIK3R3/ANXA1/CLDN7/CD40/ITGA6/C5AR1/SRC/CXCR4/GNAI2/ADAM10/SIRT1/TERT/SPOCK2/PTK2B/JAM2/ONECUT1/DAB2IP/HBEGF/SMAD3/CSF1R/AIF1/TIRAP/FAM107A/ELP6/CTSH/FN1/SEMA7A/IGF1R/AGT/SLC8A1/P2RY12/SEMA3…
BP	GO:0061136	regulation of proteasomal protein catabolic process	144	0.495142	1.47376	0.00712733	0.153373	0.141059	990	tags=14%, list=8%, signal=13%	PSMC4/DESI1/PSMD14/SGTA/PSMC3/PSMC2/PSMC1/UFL1/HSPBP1/VCP/RAD23B/LRRK2/USP5/FBXW7/USP7/KLHL40/ALAD/USP14/BAG5/N4BP1
BP	GO:0019751	polyol metabolic process	107	-0.64034	-1.57451	0.00718153	0.15409	0.141719	1579	tags=29%, list=12%, signal=26%	PTK2B/IPMK/TPI1/PLA2G4A/INPP4A/TKFC/PTH1R/PCBD1/ITPKB/MTMR7/PLCB1/MOGAT2/CYP27B1/BPNT1/PLCB2/PDXP/PLPP2/CYP27A1/GCH1/P2RY6/ASAH2/SORD/ACER2/IP6K2/PLCB4/CYP2R1/DGAT2/PLCD1/PLD4/QDPR/CYP3A4
BP	GO:0036507	protein demannosylation	19	0.788298	1.64833	0.00725003	0.154279	0.141893	610	tags=37%, list=5%, signal=35%	DERL2/SEL1L/SYVN1/UGGT2/UGGT1/MAN1B1/EDEM1
BP	GO:0036508	protein alpha-1,2-demannosylation	19	0.788298	1.64833	0.00725003	0.154279	0.141893	610	tags=37%, list=5%, signal=35%	DERL2/SEL1L/SYVN1/UGGT2/UGGT1/MAN1B1/EDEM1
CC	GO:0019866	organelle inner membrane	417	0.392004	1.29161	0.00725307	0.154279	0.141893	1772	tags=19%, list=14%, signal=17%	OTC/HSPD1/ADCK1/MFSD10/PMPCB/FOXRED1/DPY19L3/P2RX2/LRPPRC/MRPL9/HSPA9/HADHA/DAP3/LGALS3/MRPS22/DNAJC11/TAMM41/MRPL4/OPA1/LRRK2/SLC8B1/FAM169A/COA3/UNC50/COX18/SPG7/UQCRC1/MRPS18C/IMMT/L2HGDH/CYCS/SLC25A16/TRAP1/MRPL24/TMEM177/PDE2A/MRPS12/MRPL57/MRPL41/GHITM/SLC25A24/MRPL46/MRPL22/MRPS27/MRPL53/HADHB/CYC1/NDUFV2/TIMM8B/MRPL40/ERN1/PHB2/ALDH18A1/ABCB8/AURKAIP1/SLC25A29/MRPL32/MRPS18B/MRPS26/MRPS21…
CC	GO:0033116	endoplasmic reticulum-Golgi intermediate compartment membrane	67	0.597179	1.60355	0.0073299	0.155466	0.142984	1375	tags=31%, list=11%, signal=28%	INS/YIF1A/SURF4/TMED10/TRIP11/CALR/COPZ2/VMP1/CLN8/RAB2A/ERGIC1/LMAN1/SEC22B/TMED7/ERGIC3/TMED2/ERGIC2/YIF1B/GOLGA2/TMED9/RAB1B
BP	GO:0030111	regulation of Wnt signaling pathway	307	0.401018	1.2851	0.00738083	0.156097	0.143565	1434	tags=20%, list=11%, signal=18%	PSMC4/PSMD14/PSMD2/PSMC3/EGF/PPM1B/PSMD6/PSMD1/APC/PSMC5/PSMC2/PSMC1/PSMA3/PSMD7/PSMD13/PSMD8/PSMD4/SOX2/PSMD3/NFKB1/PSMB5/PSMA5/PSMC6/PSMB4/PSMD12/VCP/PSMB2/TBX18/RNF220/LRRK2/PSMD11/PSMB1/SOST/PSMA2/ESR1/AXIN2/NPHP4/DISC1/PSMA1/ISL1/TRABD2B/WNT3/PTPRU/PSMA6/FRZB/CTNND2/ROR2/PSMA4/AMER2/PPP2R1A/SMARCA4/LRRK1/PSMB3/MDFI/PSMB7/SOX10/RBX1/IGFBP1/STK4/SULF2
MF	GO:0001540	amyloid-beta binding	73	-0.663064	-1.55618	0.00746575	0.156903	0.144306	1007	tags=25%, list=8%, signal=23%	ITM2B/CST3/GRIN2B/PGRMC1/ITM2A/APOA1/DLGAP3/C1QA/GSAP/FPR2/ITGAM/FZD4/EPHA4/APOE/LDLRAD3/ITGA2/BACE1/BCHE
MF	GO:0005355	glucose transmembrane transporter activity	12	-0.877561	-1.57012	0.0074827	0.156903	0.144306	586	tags=42%, list=5%, signal=40%	SLC2A1/SLC2A8/SLC2A2/SLC5A2/SLC5A9
MF	GO:0015149	hexose transmembrane transporter activity	12	-0.877561	-1.57012	0.0074827	0.156903	0.144306	586	tags=42%, list=5%, signal=40%	SLC2A1/SLC2A8/SLC2A2/SLC5A2/SLC5A9
BP	GO:0042180	cellular ketone metabolic process	193	0.46216	1.42106	0.00761267	0.158178	0.145479	1025	tags=19%, list=8%, signal=17%	INS/PSMC4/PSMD14/PSMD2/IL1B/PSMC3/PSMD6/PSMD1/PSMC5/PSMC2/PSMC1/PSMA3/PSMD7/PSMD13/PSMD8/PSMD4/EIF6/PSMD3/ATP2B4/PSMB5/PSMA5/PRKAG2/PSMC6/PSMB4/PSMD12/PSMB2/PSMD11/PSMB1/ABCD1/PSMA2/PSMA1/FGF19/ADIPOR1/ODC1/PSMA6/NR4A3
BP	GO:1900542	regulation of purine nucleotide metabolic process	94	0.534286	1.51883	0.00765241	0.158178	0.145479	1401	tags=19%, list=11%, signal=17%	INS/JMJD8/NUP205/NUP35/EIF6/ARNT/PRKAG2/SEC13/VCP/NUP210/NUP188/NUP107/TPR/NUP98/HDAC4/NUP155/NUP153/PDZD3
BP	GO:0000377	RNA splicing, via transesterification reactions with bulged adenosine as nucleophile	303	0.41623	1.33437	0.00766106	0.158178	0.145479	2091	tags=20%, list=16%, signal=17%	KHDRBS3/WDR83/STRAP/PRPF8/PTBP2/RAVER2/SNRNP200/SNRPN/DHX9/MBNL2/YTHDC1/RBM41/CLNS1A/ELAVL1/RBM4/NOVA1/EIF4A3/RBM15/C1QBP/HNRNPD/NUP98/PRPF31/GEMIN6/PRMT7/SNRNP48/HNRNPH1/SF3B3/PUF60/NCL/PPIL3/USP4/TIA1/WDR77/RBM4B/SMN1/SF3B2/EFTUD2/SRSF4/PPIL1/HNRNPU/U2AF1L5/COIL/IK/PRPF19/SNRPG/SF3B1/WBP11/PRPF38A/SNRPA/SNRPB2/NCBP2/HNRNPA1/AQR/POLR2D/PPIH/HNRNPA0/SNRPF/SNRNP70/CPSF1/LSM6
BP	GO:0000398	mRNA splicing, via spliceosome	303	0.41623	1.33437	0.00766106	0.158178	0.145479	2091	tags=20%, list=16%, signal=17%	KHDRBS3/WDR83/STRAP/PRPF8/PTBP2/RAVER2/SNRNP200/SNRPN/DHX9/MBNL2/YTHDC1/RBM41/CLNS1A/ELAVL1/RBM4/NOVA1/EIF4A3/RBM15/C1QBP/HNRNPD/NUP98/PRPF31/GEMIN6/PRMT7/SNRNP48/HNRNPH1/SF3B3/PUF60/NCL/PPIL3/USP4/TIA1/WDR77/RBM4B/SMN1/SF3B2/EFTUD2/SRSF4/PPIL1/HNRNPU/U2AF1L5/COIL/IK/PRPF19/SNRPG/SF3B1/WBP11/PRPF38A/SNRPA/SNRPB2/NCBP2/HNRNPA1/AQR/POLR2D/PPIH/HNRNPA0/SNRPF/SNRNP70/CPSF1/LSM6
BP	GO:0046949	fatty-acyl-CoA biosynthetic process	27	-0.841482	-1.72815	0.00768571	0.158178	0.145479	1097	tags=26%, list=9%, signal=24%	HACD2/CBR4/FASN/PPT1/ACLY/ACSL5/SCD5
BP	GO:0070141	response to UV-A	10	-0.880974	-1.53769	0.00769353	0.158178	0.145479	109	tags=30%, list=1%, signal=30%	EGFR/OPN1SW/MMP2
BP	GO:0090177	establishment of planar polarity involved in neural tube closure	10	-0.880662	-1.53715	0.00769353	0.158178	0.145479	760	tags=40%, list=6%, signal=38%	FZD2/SFRP2/WNT5A/CTHRC1
MF	GO:0004298	threonine-type endopeptidase activity	11	0.868275	1.5976	0.00785212	0.16099	0.148065	1350	tags=64%, list=11%, signal=57%	PSMB5/PSMB4/PSMB2/PSMB1/PSMA4/PSMB3/PSMB7
BP	GO:0007029	endoplasmic reticulum organization	67	0.594283	1.59577	0.00799123	0.163242	0.150137	1708	tags=36%, list=13%, signal=31%	SGTA/SEC16A/SEC16B/REEP2/SMPD4/REEP3/RAB3GAP2/LRRK2/SEC61A1/LMAN1/RAB18/SEC31A/TRAM1/ESYT2/TMED2/EMC4/LMAN2L/EMC9/CCDC47/JAGN1/GAK/EMC10/EMC2/LMAN2
BP	GO:0030335	positive regulation of cell migration	410	-0.492463	-1.3737	0.0080062	0.163242	0.150137	2406	tags=28%, list=19%, signal=23%	RIN2/F10/EPB41L5/NEDD9/PLCG2/DAPK2/DOCK4/PREX1/TCAF2/RHOB/IL1R1/GRN/FOXP1/SNAI2/ARF6/ANGPTL3/TMSB4X/MOSPD2/PIK3CG/CCL20/HMOX1/SERPINE1/ACKR3/RAC2/RAB25/F2R/MAZ/ITGB1/PLPP3/FGF1/TNFRSF14/ABL1/BMP7/ANGPT4/PIK3R3/ANXA1/CD40/ITGA6/C5AR1/SRC/CXCR4/GNAI2/ADAM10/SIRT1/TERT/PTK2B/JAM2/ONECUT1/DAB2IP/HBEGF/SMAD3/CSF1R/AIF1/TIRAP/FAM107A/ELP6/CTSH/FN1/SEMA7A/IGF1R/AGT/SLC8A1/P2RY12/SEMA3A/MGAT5/PTN/GATA2/Z…
BP	GO:0009100	glycoprotein metabolic process	312	0.41275	1.32498	0.00808094	0.164312	0.151121	1385	tags=20%, list=11%, signal=18%	NUDT14/B3GAT2/NAGPA/SDF2L1/DERL2/DOLPP1/MOGS/SEL1L/POMT1/SYVN1/STT3B/DPY19L3/SOAT1/UGGT2/MAGT1/UGGT1/ERP44/DPM3/TRIP11/GALNT9/PLOD3/MAN1B1/TRAK2/EOGT/OST4/GFPT1/ALG12/TUSC3/EDEM1/STT3A/DPM1/LMAN1/NECAB1/KRTCAP2/PORCN/ALG5/DDOST/RPN2/ALG6/NUS1/B3GNT3/ALG3/MGAT4A/CHST11/GANC/PGM3/B3GNT7/ALG1/CCR7/PMM2/GALNT10/TMEM258/TMEM165/DPAGT1/GALNT5/DSEL/EXTL2/DAD1/OSTC/GOLGA2/FUT11/RAB1B/MUC6
BP	GO:0038065	collagen-activated signaling pathway	12	-0.8736	-1.56304	0.00813335	0.164924	0.151683	1103	tags=50%, list=9%, signal=46%	ITGA11/OTOL1/DDR1/COL1A1/ITGA2/MUSK
BP	GO:0007162	negative regulation of cell adhesion	198	-0.566327	-1.49533	0.00816864	0.165185	0.151924	1062	tags=27%, list=8%, signal=25%	DUSP3/KNG1/SNAI2/SOCS6/SMAD7/CORO2B/SERPINE1/PRKCD/MAP2K5/TNFRSF14/ABL1/ANXA1/CDH1/ADAMTS18/CLDN7/SRC/ADAM10/FBLN1/HLX/DACT2/FAM107A/TACSTD2/RUNX3/CRTAM/GNRH1/APOA1/PLXNA4/FZD7/ZC3H12A/AKNA/CD9/PIK3R1/CXCL12/NRARP/SWAP70/FZD4/PLXNA2/DSCAM/ANGPT1/BCL6/RGCC/NDFIP1/ANGPT2/TGFBI/MMP14/ACER2/COL1A1/PLG/LOXL3/SFTPD/CCL25/RC3H2/FGL1/POSTN
BP	GO:0008593	regulation of Notch signaling pathway	84	-0.6719	-1.61335	0.00826469	0.166671	0.15329	1359	tags=20%, list=11%, signal=18%	RFNG/MFNG/DLL1/GATA2/ARRB1/DLL4/NRARP/KAT2B/BCL6/GAS2/MMP14/DLK2/HES1/TSPAN15/ELF3/TSPAN5/POSTN
BP	GO:0040017	positive regulation of locomotion	432	-0.489596	-1.36773	0.00837083	0.168352	0.154836	2406	tags=28%, list=19%, signal=23%	RIN2/F10/EPB41L5/NEDD9/PLCG2/DAPK2/DOCK4/PREX1/TCAF2/STX3/RHOB/IL1R1/GRN/FOXP1/SNAI2/ARF6/TACR3/ANGPTL3/TMSB4X/MOSPD2/PIK3CG/CCL20/HMOX1/SERPINE1/ACKR3/RAC2/RAB25/F2R/MAZ/ITGB1/PLPP3/FGF1/TNFRSF14/ABL1/BMP7/ANGPT4/PIK3R3/ANXA1/CLDN7/CD40/ITGA6/C5AR1/SRC/CXCR4/GNAI2/ADAM10/SIRT1/TERT/SPOCK2/PTK2B/JAM2/ONECUT1/DAB2IP/HBEGF/SMAD3/CSF1R/AIF1/TIRAP/FAM107A/ELP6/CTSH/FN1/SEMA7A/IGF1R/AGT/SLC8A1/P2RY12/…
BP	GO:0030178	negative regulation of Wnt signaling pathway	180	0.471715	1.43243	0.00846751	0.169703	0.156079	1428	tags=26%, list=11%, signal=23%	PSMC4/PSMD14/PSMD2/PSMC3/PSMD6/PSMD1/APC/PSMC5/PSMC2/PSMC1/PSMA3/PSMD7/PSMD13/PSMD8/PSMD4/SOX2/PSMD3/PSMB5/PSMA5/PSMC6/PSMB4/PSMD12/PSMB2/TBX18/PSMD11/PSMB1/SOST/PSMA2/AXIN2/NPHP4/PSMA1/ISL1/TRABD2B/PTPRU/PSMA6/FRZB/ROR2/PSMA4/AMER2/PSMB3/MDFI/PSMB7/SOX10/RBX1/IGFBP1/STK4
BP	GO:0006907	pinocytosis	19	-0.856591	-1.66005	0.00848401	0.169703	0.156079	1063	tags=32%, list=8%, signal=29%	CLN3/STX1B/PPT1/CAV1/MAPKAPK3/AHSG
MF	GO:0044183	protein folding chaperone	27	0.748654	1.70593	0.00856497	0.17086	0.157142	1721	tags=48%, list=14%, signal=42%	HSP90AA1/CALR/HSPA9/CLGN/HSPA5/CCT3/CCT6A/CCT4/HSPA13/CCT8/RIC3/CCT7/CCT5
MF	GO:0070008	serine-type exopeptidase activity	10	-0.876883	-1.53055	0.0086141	0.170878	0.15716	1130	tags=70%, list=9%, signal=64%	CTSA/SCPEP1/PRCP/HPN/CPVL/ACE/F11
BP	GO:0006720	isoprenoid metabolic process	99	-0.639416	-1.56487	0.00862951	0.170878	0.15716	1163	tags=23%, list=9%, signal=21%	CRABP1/SCPEP1/RBP4/APOA1/APOB/ADH5/LRAT/RDH16/HMGCR/APOE/RDH11/APOC2/LSS/CYP4V2/ALDH8A1/IDI1/DGAT2/DHRS3/OPN1SW/RDH8/CYP1A1/CYP3A4/PECR
CC	GO:0035327	transcriptionally active chromatin	19	0.779992	1.63096	0.00863537	0.170878	0.15716	2166	tags=37%, list=17%, signal=31%	PELP1/PADI2/ESR1/TTC37/ICE2/KMT2E/EXOSC5
BP	GO:0033108	mitochondrial respiratory chain complex assembly	83	0.558023	1.54354	0.00870386	0.171773	0.157983	3230	tags=40%, list=25%, signal=30%	PET117/FOXRED1/COA3/COX18/SDHAF1/TACO1/NDUFV2/COX17/NDUFV1/SAMM50/BCS1L/NDUFAF1/NDUFAF4/UQCC2/NDUFA5/OMA1/NDUFA13/SURF1/NDUFB2/NDUFA10/NDUFAF5/AIFM1/NDUFAB1/SCO2/NDUFA12/UQCC1/UQCRFS1/NDUFB6/COX20/NDUFA11/NDUFS2/CHCHD4/ACAD9
BP	GO:0071218	cellular response to misfolded protein	19	0.779856	1.63068	0.00872773	0.171785	0.157993	438	tags=26%, list=3%, signal=25%	SDF2L1/DERL1/UGGT2/UGGT1/VCP
CC	GO:0005911	cell-cell junction	407	-0.497579	-1.38761	0.00878517	0.172456	0.15861	2009	tags=23%, list=16%, signal=20%	CLDN12/DSG2/KCNJ2/PLPP3/LDB3/AJUBA/KAZN/NPHS1/CDC42EP1/FRMD4B/ANXA1/IGSF5/HEPACAM/CDH1/CLDN7/ITGA6/AHI1/B4GALT1/PAK4/ACTB/KIRREL3/ADAM10/CDH11/JAM2/SLC2A1/SH3KBP1/CSK/CDH18/DSP/PARK7/CD53/CDCA3/TMEM47/PKD2/FRS2/CXADR/ECT2/FLCN/PDZD11/MICALL2/DLL1/EPPK1/F11R/SLC8A1/CADM4/TMOD3/GJD2/KCNJ11/GJA5/PDXP/PIK3R1/FSCN1/CLDN10/GJB4/FGF13/ALOX15B/TMEM204/PPP1CA/FZD4/CDH2/WASF2/FRMPD2/MYH1/LYN/HPN/SLC2A2/LIN…
MF	GO:0015081	sodium ion transmembrane transporter activity	106	-0.642176	-1.57462	0.00892177	0.174042	0.160069	366	tags=9%, list=3%, signal=9%	ATP1A2/SLC5A2/SLC6A6/ABCB11/SLC13A5/SLC10A1/SLC6A7/SLC10A2/SLC5A9/SLC13A4
BP	GO:0043687	post-translational protein modification	296	0.420952	1.34476	0.00896018	0.174042	0.160069	1116	tags=18%, list=9%, signal=17%	PSMC4/SCG3/P3H1/PSMD14/PSMD2/PDIA6/PSMC3/PSMD6/PSMD1/STT3B/PSMC5/FBXO41/RABGGTA/PSMC2/HSP90B1/PSMC1/PSMA3/PSMD7/PSMD13/PSMD8/PSMD4/PSMD3/PSMB5/PSMA5/PSMC6/PSMB4/PSMD12/ANKRD9/EVA1A/KCTD7/PSMB2/PTP4A2/RAB2A/PSMD11/FBXW7/STT3A/PSMB1/PSMA2/ASB5/COPS4/LAMB2/DNAJC3/CHML/CHM/PSMA1/DCAF7/PSMA6/UBE2M/MGAT4A/COPS8/GAN/PSMA4/LTBP1
MF	GO:0005402	carbohydrate:cation symporter activity	14	-0.888692	-1.61882	0.00899708	0.174042	0.160069	338	tags=14%, list=3%, signal=14%	SLC5A2/SLC5A9
CC	GO:0030135	coated vesicle	237	0.440149	1.37579	0.00903524	0.174042	0.160069	1400	tags=22%, list=11%, signal=20%	HSPD1/SEC24D/CFTR/EGF/AP3B2/SEC16A/CLTB/HAX1/YIF1A/PDCD6/YIPF5/TMED10/SEC16B/EPN1/COPZ2/COPG2/RGS19/SEC13/SYT11/AP1G2/RAB27B/ERGIC1/LMAN1/SEC22B/TMED7/SEC31A/FURIN/ERGIC3/COPA/TMED4/TMED2/COPE/KDELR2/VWF/TFRC/COPZ1/CLTC/ROR2/LMAN2L/ERGIC2/YIF1B/CLINT1/SYNRG/ARCN1/CLVS2/GOLGA2/SCYL1/SEC23B/TMED9/RAB14/SYT9/USO1
BP	GO:0010771	negative regulation of cell morphogenesis involved in differentiation	12	-0.870295	-1.55712	0.00904427	0.174042	0.160069	6	tags=25%, list=0%, signal=25%	FBLN1/TACSTD2/POSTN
BP	GO:1900025	negative regulation of substrate adhesion-dependent cell spreading	12	-0.870295	-1.55712	0.00904427	0.174042	0.160069	6	tags=25%, list=0%, signal=25%	FBLN1/TACSTD2/POSTN
BP	GO:0035268	protein mannosylation	18	0.791648	1.61714	0.00907452	0.174042	0.160069	888	tags=33%, list=7%, signal=31%	SDF2L1/POMT1/DPY19L3/DPM3/DPM1/NUS1
BP	GO:0032606	type I interferon production	96	0.541405	1.54498	0.00907844	0.174042	0.160069	620	tags=10%, list=5%, signal=10%	HSPD1/IL10/RELB/PPM1B/HSP90AA1/NFKB1/IKBKE/NPLOC4/IRAK1/DHX9
BP	GO:0001952	regulation of cell-matrix adhesion	98	-0.641397	-1.56535	0.00910484	0.174042	0.160069	2537	tags=35%, list=20%, signal=28%	IQGAP1/CD3E/CEACAM6/RIN2/EPB41L5/CORO1C/DUSP3/DAG1/PEAK1/SERPINE1/COL16A1/EPHA3/ABL1/GPM6B/SRC/WDPCP/PTK2B/CDK6/ONECUT1/SMAD3/PLEKHA2/FAM107A/EMP2/PLAU/PIK3R1/BCL6/DDR1/MMP14/ACER2/NRP1/CCL25/CSF1/PRKCZ/POSTN
BP	GO:0061061	muscle structure development	483	-0.471826	-1.32675	0.00912664	0.174042	0.160069	2512	tags=28%, list=20%, signal=23%	MYLK/FHL1/SHH/MBNL3/TANC1/BCL9/EFNB2/PRKAA1/NRAP/FLOT2/IGFBP5/DDX17/RARB/ZFP36L1/HIVEP3/ADAM12/WFIKKN1/MYH11/LRRC10/KRT19/MEF2D/TCF7L2/SYNPO2L/DAG1/SMAD7/NOG/TBX5/TCF12/PDCD4/KRAS/MAPK12/TNNC1/ABL1/NMRK2/LDB3/TBX1/NPHS1/ID2/CBY1/MYH7/MYH6/MEGF10/GATA4/SGCE/ZFHX3/KDM6B/SIRT1/MYL2/ASB2/SOX11/SPEG/YY1/JAM2/TNNT1/IGFBP3/HLX/CDK5/WT1/TBX20/HBEGF/CAMK1/SMAD3/DSP/CD53/TCF15/CFLAR/FRS2/CXADR/EPAS1/POU6F1…
BP	GO:0045786	negative regulation of cell cycle	498	0.373742	1.24107	0.00913393	0.174042	0.160069	1868	tags=21%, list=15%, signal=18%	PSMC4/IL10/PSMD14/PSMD2/PSMC3/PSMD6/PSMD1/APC/PSMC5/PSMC2/PSMC1/PSMA3/PSMD7/UHMK1/LIF/PSMD13/PSMD8/PSMD4/SOX2/CALR/PSMD3/RBL2/TBRG4/RAD1/PSMB5/PSMA5/SGSM3/PRKAG2/STK33/PSMC6/PSMB4/SUSD2/PSMD12/PSMB2/PSMD11/EME1/THBS1/TRIP13/KIF20B/PSMB1/PSMA2/TPR/HPGD/PPP2R3B/FANCD2/CDK5RAP3/PSMA1/IPO5/PRMT1/NSUN2/RAD9A/PSMA6/GPNMB/IPO7/ATR/SCRIB/STRADB/WAPL/SPDL1/PSMA4/ERCC6/MDM4/AVEN/INHBA/ERN1/PSMB3/AURKAIP1/P…
BP	GO:0098743	cell aggregation	20	-0.849288	-1.66237	0.00914893	0.174042	0.160069	784	tags=30%, list=6%, signal=28%	MAPK14/BMPR1B/LTF/COL11A1/SOX9/OTOR
BP	GO:0071280	cellular response to copper ion	11	-0.89379	-1.57432	0.00922161	0.174974	0.160926	96	tags=45%, list=1%, signal=45%	AQP1/SNCA/CYP1A1/BACE1/AOC1
MF	GO:0017056	structural constituent of nuclear pore	22	0.760205	1.64573	0.0092821	0.17567	0.161566	2630	tags=68%, list=21%, signal=54%	NUP205/NUP35/NUP188/NUP107/TPR/NUP98/NUP155/NUP153/NUTF2/NUP160/NUP85/NUP88/NUP133/NUP93/NUP54
CC	GO:0016234	inclusion body	62	0.59579	1.58331	0.00934072	0.176327	0.162171	1081	tags=19%, list=9%, signal=18%	PSMC4/PSMC5/CARD14/SFMBT2/LRRK2/PRDM16/EDEM1/PRKCQ/TPR/NUP98/BAG5/STRADB
BP	GO:0009308	amine metabolic process	136	0.504703	1.49358	0.00942594	0.177076	0.16286	966	tags=25%, list=8%, signal=23%	TPH1/INS/PSMC4/PSMD14/PSMD2/PSMC3/PSMD6/PSMD1/PSMC5/PSMC2/PSMC1/PSMA3/PSMD7/PSMD13/PSMD8/PSMD4/PSMD3/ATP2B4/PSMB5/PSMA5/PSMC6/PSMB4/PSMD12/PSMB2/NR4A2/PSMD11/PSMB1/PSMA2/SRM/AMD1/PSMA1/DDC/ODC1/PSMA6
BP	GO:0032200	telomere organization	132	0.508787	1.48638	0.00942839	0.177076	0.16286	2613	tags=30%, list=21%, signal=24%	TEP1/XRN1/HSP90AA1/CCT3/CCT6A/USP7/CCT4/PRKCQ/TEN1/PTGES3/RIF1/HNRNPD/CCT8/ATR/SMG1/RFC1/UPF1/NHP2/RAD51C/HNRNPU/CCT7/RAD51/CCT5/TELO2/PRKDC/TERF2IP/YLPM1/HNRNPA1/RFC3/PNKP/ERCC4/TNKS/SP100/NAT10/PRIM2/NEK7/RPA2/PINX1/TCP1/DHX36
MF	GO:0008201	heparin binding	119	-0.616651	-1.53089	0.00968401	0.181036	0.166502	1269	tags=26%, list=10%, signal=24%	FGFBP3/HBEGF/EVA1C/F2/ZNF146/FN1/LXN/PTN/FSTL1/RSPO1/APOB/SELL/PCOLCE2/SERPINA10/CXCL10/LIPH/LTF/PGF/NDNF/APOE/PRELP/SERPIND1/COL11A1/SMOC1/CRISPLD2/NRP1/ANOS1/NELL2/AOC1/F11/POSTN
BP	GO:0006515	protein quality control for misfolded or incompletely synthesized proteins	26	0.742441	1.6656	0.0096883	0.181036	0.166502	1063	tags=27%, list=8%, signal=25%	SDF2L1/DERL1/UGGT2/UGGT1/VCP/CLPP/RNF126
MF	GO:0003697	single-stranded DNA binding	96	0.537958	1.53514	0.00979989	0.182659	0.167994	2206	tags=24%, list=17%, signal=20%	HSPD1/LRPPRC/NUP35/APTX/RAD23B/DHX9/TEN1/SSBP1/MCM10/RAD23A/FUBP3/HNRNPU/HSF1/RAD51/WBP11/LONP1/TERF2IP/HNRNPA1/SUB1/POLR2D/ERCC4/MEIOB/MCMDC2
CC	GO:0030663	COPI-coated vesicle membrane	14	0.847903	1.64809	0.00984934	0.183118	0.168417	1582	tags=86%, list=12%, signal=75%	COPZ2/COPG2/TMED7/COPA/TMED2/COPE/KDELR2/COPZ1/ARCN1/SCYL1/COPB1/COPB2
BP	GO:0007423	sensory organ development	440	-0.481739	-1.34529	0.0100145	0.185645	0.170741	2005	tags=23%, list=16%, signal=20%	PLS1/IFT172/WNT2B/BMP7/SLC44A4/JMJD6/TBX1/GABRA5/MCOLN3/COL2A1/MAFB/ZNF513/ADAMTS18/USH1C/IFT88/AHI1/ADAM10/WDPCP/SOBP/MERTK/LIMK2/SOX11/SLC17A6/YY1/TMEM231/HOXA2/WT1/SOD1/BAX/SMAD3/HAND2/TCF15/FRS2/MYCL/DLL1/PLPPR4/SLC9A3R1/WNT10B/BNC2/USH2A/RBP4/ADGRV1/ATP8B1/PTN/PDE6C/SMARCD3/HESX1/BLOC1S3/MYOM2/GATA2/TRIOBP/TGFBR2/OPN4/GATA3/PRRX1/LGR5/DLL4/FGF8/IGFN1/FZD2/WNT5B/TSHZ1/NKX3-2/CRB2/BMPR1B/RORB/…
BP	GO:0006721	terpenoid metabolic process	82	-0.677393	-1.62119	0.0100516	0.185645	0.170741	1163	tags=26%, list=9%, signal=23%	CRABP1/SCPEP1/RBP4/APOA1/APOB/ADH5/LRAT/RDH16/APOE/RDH11/APOC2/LSS/CYP4V2/ALDH8A1/DGAT2/DHRS3/OPN1SW/RDH8/CYP1A1/CYP3A4/PECR
BP	GO:0018401	peptidyl-proline hydroxylation to 4-hydroxy-L-proline	10	-0.873216	-1.52415	0.0100607	0.185645	0.170741	745	tags=20%, list=6%, signal=19%	EGLN1/EGLN3
BP	GO:0001510	RNA methylation	69	0.572645	1.54364	0.0101763	0.18731	0.172272	2080	tags=26%, list=16%, signal=22%	TRMT10A/MTO1/METTL2A/THADA/RBM15/NSUN2/HENMT1/TRMT2A/FBL/NSUN6/TRMT1L/NSUN5/TRMT61A/METTL6/FDXACB1/EMG1/GTPBP3/ZCCHC4
CC	GO:0034708	methyltransferase complex	86	0.545508	1.52869	0.0102425	0.18806	0.172962	2056	tags=27%, list=16%, signal=23%	HCFC2/PELP1/KMT2A/SETD1A/CLNS1A/RBM15/TAF7/PRMT1/RIOK1/PRPF31/SETD1B/MGA/WDR77/RBBP4/TRMT61A/HCFC1/KMT2B/SNRPG/RUVBL2/TEX10/E2F6/TRIM37/SNRPF
BP	GO:0014850	response to muscle activity	22	-0.818613	-1.61739	0.0102734	0.188159	0.173053	218	tags=27%, list=2%, signal=27%	AGT/GOT2/ITGA2/ABCG5/ABCG8/POSTN
BP	GO:0000394	RNA splicing, via endonucleolytic cleavage and ligation	15	0.821269	1.61458	0.0102999	0.188178	0.17307	1228	tags=20%, list=10%, signal=18%	TSEN15/RTCB/ERN1
MF	GO:0016709	oxidoreductase activity, acting on paired donors, with incorporation or reduction of molecular oxygen, NAD(P)H as one donor, and incorporation of one atom of oxygen	26	-0.81407	-1.66547	0.0103653	0.188818	0.173659	1132	tags=35%, list=9%, signal=32%	CYP27B1/FMO5/CYP51A1/CYP46A1/CYP27A1/MSMO1/SQLE/CYP1A1/CYP3A4
MF	GO:0015373	anion:sodium symporter activity	11	-0.890071	-1.56777	0.0104158	0.188818	0.173659	4	tags=18%, list=0%, signal=18%	SLC18A2/SLC13A4
BP	GO:0060828	regulation of canonical Wnt signaling pathway	241	0.437648	1.37115	0.0104389	0.188818	0.173659	1434	tags=22%, list=11%, signal=20%	PSMC4/PSMD14/PSMD2/PSMC3/EGF/PPM1B/PSMD6/PSMD1/APC/PSMC5/PSMC2/PSMC1/PSMA3/PSMD7/PSMD13/PSMD8/PSMD4/SOX2/PSMD3/NFKB1/PSMB5/PSMA5/PSMC6/PSMB4/PSMD12/VCP/PSMB2/TBX18/RNF220/LRRK2/PSMD11/PSMB1/SOST/PSMA2/AXIN2/NPHP4/PSMA1/ISL1/PTPRU/PSMA6/FRZB/CTNND2/ROR2/PSMA4/AMER2/LRRK1/PSMB3/PSMB7/SOX10/RBX1/IGFBP1/STK4/SULF2
BP	GO:0030502	negative regulation of bone mineralization	12	-0.863539	-1.54504	0.0104757	0.188818	0.173659	232	tags=33%, list=2%, signal=33%	PTK2B/SOX9/AHSG/ECM1
BP	GO:0042249	establishment of planar polarity of embryonic epithelium	12	-0.863797	-1.5455	0.0104757	0.188818	0.173659	988	tags=42%, list=8%, signal=38%	CELSR1/FZD2/SFRP2/WNT5A/CTHRC1
BP	GO:0019083	viral transcription	164	0.476259	1.44507	0.0104885	0.188818	0.173659	3761	tags=46%, list=30%, signal=33%	NUP205/PSMC3/NUP35/RPL5/SEC13/NUP210/NUP188/DHX9/NUP107/TPR/NUP98/RSF1/RPS5/SMARCA4/NUP155/NUP153/RPS9/RPS13/POLR2D/RPL10/NUP160/NUP85/NUP88/RPS21/INPP5K/SUPT5H/RPL35/NUP133/SMARCB1/RPL13/NUP93/NUP54/RPS6/RPS23/RPS3/UBA52/RPL11/RPSA/RPS19/MDFIC/RPL14/POLR2L/AAAS/RPS18/TRIM62/RPS26/RPS28/RPL28/RPS10/RPS7/RPL23A/CCL3/RPL21/RPS16/RPS27A/RAE1/RPL37/RPL15/RPL36/RPL27A/RPL13A/RPL24/RPL35A/RPL31/CCNT2/P…
MF	GO:0016667	oxidoreductase activity, acting on a sulfur group of donors	50	0.626297	1.59316	0.0105432	0.189194	0.174004	863	tags=22%, list=7%, signal=21%	QSOX2/PDIA6/ERO1B/PDIA4/TXNL1/DNAJC10/TXNRD2/TXNDC2/PDIA5/GFER/TXN2
MF	GO:0031593	polyubiquitin modification-dependent protein binding	36	0.676841	1.60522	0.0105606	0.189194	0.174004	2200	tags=36%, list=17%, signal=30%	PSMD4/PRPF8/IKBKE/VCP/RAD23B/UBL7/OTUD7B/RAD23A/UBXN1/ZFAND2B/TAB2/ATRIP/TNIP2
MF	GO:0046906	tetrapyrrole binding	94	-0.616563	-1.48892	0.0110296	0.196426	0.180656	1238	tags=26%, list=10%, signal=23%	HEBP1/CYP27B1/CYP19A1/CYP4F22/CYP2U1/PGRMC1/CYBA/NOX4/CYP4B1/HEBP2/SLC48A1/CYP51A1/CYP46A1/CYP27A1/CYP4V2/TBXAS1/CYP2R1/AMBP/MB/CYP2J2/CYP1A1/CYP3A4/HBG1/FLVCR2
BP	GO:0055081	anion homeostasis	26	0.736501	1.65227	0.0110312	0.196426	0.180656	456	tags=8%, list=4%, signal=7%	OTC/KCTD7
CC	GO:0071005	U2-type precatalytic spliceosome	49	0.639467	1.61874	0.0110475	0.196426	0.180656	3435	tags=49%, list=27%, signal=36%	PRPF8/SNRNP200/PRPF31/SF3B3/SF3B2/EFTUD2/IK/SNRPG/SF3B1/PRPF38A/SNRPB2/SNRPF/LSM6/LSM5/SNU13/SNRPE/RNF113A/DHX16/PRPF3/SF3A1/SF3A3/SNRPD2/SNRPD1/MAGOHB
BP	GO:1903578	regulation of ATP metabolic process	92	0.541876	1.53586	0.0111336	0.196426	0.180656	911	tags=17%, list=7%, signal=16%	INS/JMJD8/NUP205/NUP35/EIF6/ARNT/PRKAG2/SEC13/VCP/NUP210/NUP188/ABCD1/NUP107/TPR/TSPO/NUP98
BP	GO:0002429	immune response-activating cell surface receptor signaling pathway	260	0.422081	1.33984	0.0111475	0.196426	0.180656	1104	tags=16%, list=9%, signal=15%	PSMC4/NFKBID/PSMD14/PSMD2/RELB/PSMC3/PSMD6/PSMD1/PSMC5/PSMC2/SLC39A10/HSP90AA1/PSMC1/PSMA3/PSMD7/PSMD13/PSMD8/PSMD4/PSMD3/NFKB1/PSMB5/LGALS3/PSMA5/PSMC6/PSMB4/PSMD12/PSMB2/ITK/EIF2B1/PSMD11/PRKCQ/PSMB1/PSMA2/ARPC5/TAB1/PSMA1/PSMA6/IKBKB/CR1/NR4A3/PLPP4/CCR7/PSMA4
BP	GO:0002757	immune response-activating signal transduction	260	0.422081	1.33984	0.0111475	0.196426	0.180656	1104	tags=16%, list=9%, signal=15%	PSMC4/NFKBID/PSMD14/PSMD2/RELB/PSMC3/PSMD6/PSMD1/PSMC5/PSMC2/SLC39A10/HSP90AA1/PSMC1/PSMA3/PSMD7/PSMD13/PSMD8/PSMD4/PSMD3/NFKB1/PSMB5/LGALS3/PSMA5/PSMC6/PSMB4/PSMD12/PSMB2/ITK/EIF2B1/PSMD11/PRKCQ/PSMB1/PSMA2/ARPC5/TAB1/PSMA1/PSMA6/IKBKB/CR1/NR4A3/PLPP4/CCR7/PSMA4
MF	GO:0001046	core promoter sequence-specific DNA binding	29	0.700797	1.62377	0.0111942	0.196426	0.180656	1196	tags=17%, list=9%, signal=16%	TAF1C/AGO1/RRN3/DRAP1/SMARCA4
BP	GO:0001502	cartilage condensation	18	-0.845378	-1.62569	0.0112274	0.196426	0.180656	784	tags=28%, list=6%, signal=26%	MAPK14/BMPR1B/COL11A1/SOX9/OTOR
MF	GO:0033764	steroid dehydrogenase activity, acting on the CH-OH group of donors, NAD or NADP as acceptor	18	-0.846347	-1.62756	0.0112274	0.196426	0.180656	846	tags=33%, list=7%, signal=31%	HSD17B4/RDH16/HSD17B7/HSD3B1/RDH8/HSD11B2
BP	GO:0006490	oligosaccharide-lipid intermediate biosynthetic process	19	0.773148	1.61665	0.0112304	0.196426	0.180656	1233	tags=37%, list=10%, signal=33%	DOLPP1/ALG12/ALG6/NUS1/ALG3/ALG1/DPAGT1
BP	GO:0030208	dermatan sulfate biosynthetic process	12	-0.861512	-1.54141	0.0113866	0.198687	0.182736	1113	tags=33%, list=9%, signal=30%	NCAN/VCAN/CSPG5/DCN
BP	GO:0045137	development of primary sexual characteristics	166	-0.569389	-1.48303	0.01147	0.199326	0.183323	1863	tags=23%, list=15%, signal=20%	COL9A3/HOXA9/ADCYAP1/SRC/GATA4/SIRT1/KLHL10/WT1/SOD1/BAX/BRCA2/CYP19A1/SEMA3A/GNRH1/TNFSF10/REN/HESX1/BOK/HSD17B4/GATA3/ARRB1/FGF8/BMPR1B/INHBB/FZD4/SFRP2/GAS2/TLR3/MMP14/NTRK1/KITLG/PGR/NR0B1/DMC1/SOX9/LHFPL2/WNT5A/AMH
BP	GO:0008272	sulfate transport	11	-0.883731	-1.55661	0.0114772	0.199326	0.183323	273	tags=18%, list=2%, signal=18%	SLC25A30/SLC13A4
BP	GO:0006458	'de novo' protein folding	29	0.700436	1.62294	0.0115769	0.199807	0.183765	932	tags=28%, list=7%, signal=26%	HSPD1/SDF2L1/SDF2/UGGT1/HSPA9/HSPA5/PTGES3/HSPA13
BP	GO:0072567	chemokine (C-X-C motif) ligand 2 production	14	-0.877743	-1.59888	0.0115861	0.199807	0.183765	6	tags=14%, list=0%, signal=14%	TIRAP/POSTN
BP	GO:2000341	regulation of chemokine (C-X-C motif) ligand 2 production	14	-0.877743	-1.59888	0.0115861	0.199807	0.183765	6	tags=14%, list=0%, signal=14%	TIRAP/POSTN
BP	GO:0031960	response to corticosteroid	119	-0.611357	-1.51774	0.0116783	0.200927	0.184795	1389	tags=24%, list=11%, signal=21%	ANXA1/AGXT/ADCYAP1/PCK1/GHSR/SRC/TAT/CFLAR/ZFP36L2/FAM107A/FBXO32/GNRH1/DDIT4/CPS1/SPARC/FIBIN/CPN1/COL1A1/ERRFI1/CDO1/FLT3/BGLAP/EPO/HSD3B1/GLB1/UCP3/BCHE/HSD11B2
BP	GO:0022612	gland morphogenesis	95	-0.639739	-1.54854	0.0118169	0.202839	0.186554	1470	tags=26%, list=12%, signal=23%	GLI1/BAX/CFLAR/CSF1R/FRS2/SLC9A3R1/SEMA3A/PTN/TGFBR2/FGF8/SEMA3C/HPN/DDR1/PLAG1/PDGFA/PGR/HOXA13/HGF/ELF3/SOX9/CAV1/WNT5A/SOSTDC1/CSF1/FGL1
BP	GO:0006935	chemotaxis	484	-0.476116	-1.33995	0.0119993	0.205246	0.188768	2325	tags=24%, list=18%, signal=20%	EVL/DOCK4/PREX1/STX3/YTHDF1/CNR2/PLA2G1B/DUSP3/SLIT3/DAG1/GFRA2/ACKR4/TNFSF11/IL17RC/TMSB4X/NOG/MOSPD2/PIK3CG/CCL20/SERPINE1/PRKCD/ACKR3/RAC2/PLD1/EPHA3/FGF1/EFNA2/BMP7/HSD3B7/EPHA6/ANXA1/C5AR1/SRC/EPHB3/CXCR4/CDH4/ADAM10/RALA/PTK2B/CSF3R/HOXA2/CDK5/SH3KBP1/HBEGF/SMAD3/CSF1R/AIF1/TIRAP/KALRN/FRS2/VLDLR/CXADR/TRPM2/SEMA7A/P2RY12/DPEP1/LOX/COLEC10/SEMA3A/PTN/APOA1/PLXNA4/ARX/SEMA3D/CKLF/VEGFC/AKIRI…
BP	GO:0050673	epithelial cell proliferation	309	-0.515077	-1.40975	0.0120447	0.205246	0.188768	1742	tags=21%, list=14%, signal=19%	GHSR/C5AR1/B4GALT1/SIRT1/RGN/SOX11/CDK6/IGFBP3/GLI1/DAB2IP/BAX/CDKN2B/SMAD3/NODAL/APLNR/IGFBP4/BMP5/CFLAR/FAP/FRS2/BRCA2/EPPK1/RUNX3/WNT10B/PTN/APOA1/GATA2/FZD7/IGF2/VEGFC/GATA3/CXCL12/LGR5/DLL4/XDH/NRARP/SPARC/SFRP2/HPN/DUSP10/PDPK1/PGF/RGCC/MMP14/MST1/PBLD/APOE/PGR/PEX2/ERRFI1/HES1/HGF/INTU/CAV2/WFDC1/TNMD/NRP1/SOX9/CAV1/WNT5A/MAP2K1/FGL1/ECM1/TNFSF12/HTRA1/COL8A2
BP	GO:0060070	canonical Wnt signaling pathway	280	0.420138	1.33752	0.0120464	0.205246	0.188768	1434	tags=21%, list=11%, signal=19%	PSMC4/PSMD14/PSMD2/PSMC3/EGF/PPM1B/PSMD6/PSMD1/APC/PSMC5/PSMC2/PSMC1/PSMA3/PSMD7/PSMD13/PSMD8/PSMD4/WNT7B/SOX2/PSMD3/NFKB1/PSMB5/PSMA5/PSMC6/WNT9A/PSMB4/PSMD12/VCP/PSMB2/TBX18/NR4A2/RNF220/LRRK2/PSMD11/PSMB1/SOST/PSMA2/PORCN/AXIN2/NPHP4/DISC1/PSMA1/ISL1/WNT3/PTPRU/PSMA6/FRZB/CTNND2/ROR2/PSMA4/AMER2/LRP5/LRRK1/PSMB3/PSMB7/SOX10/RBX1/IGFBP1/STK4/SULF2
BP	GO:0009612	response to mechanical stimulus	166	-0.568088	-1.47964	0.0120684	0.205246	0.188768	1780	tags=24%, list=14%, signal=21%	PTGER4/CD40/SRC/CXCR4/GATA4/PTK2B/SLC2A1/JUN/ASIC2/PKD2/CCNB1/F11R/SLC8A1/ADGRV1/PTN/TTN/TGFBR2/MAPK14/CXCL12/GSN/ETS1/BCL10/CDH2/CXCL10/GADD45A/HPN/TLR3/ANGPT2/MMP14/TLR5/NTRK1/COL1A1/ATP1A2/COL11A1/SOX9/ITGA2/BGLAP/BACE1/DCN/POSTN
BP	GO:1903050	regulation of proteolysis involved in cellular protein catabolic process	170	0.470593	1.42931	0.012217	0.207296	0.190653	990	tags=14%, list=8%, signal=13%	PSMC4/DESI1/PSMD14/SGTA/PSMC3/EGF/PSMC2/PSMC1/UFL1/RPL5/HSPBP1/VCP/RAD23B/LRRK2/USP5/FBXW7/USP7/KLHL40/ALAD/USP14/DISC1/BAG5/N4BP1
BP	GO:0007613	memory	84	-0.65746	-1.57868	0.0122683	0.207689	0.191015	1343	tags=21%, list=11%, signal=19%	KALRN/VLDLR/SLC8A3/NFATC4/PLCB1/ADCY1/ADCY8/PTN/RGS14/BRINP1/FGF13/PLK2/APOE/PPP1R1B/LGMN/NTF3/PRKCZ/MUSK
BP	GO:0062012	regulation of small molecule metabolic process	351	0.392479	1.28604	0.0123075	0.207876	0.191187	666	tags=13%, list=5%, signal=13%	INS/JMJD8/GCG/PSMC4/MIDN/PSMD14/PSMD2/NUP205/IL1B/PSMC3/PSMD6/PSMD1/PSMC5/PSMC2/PSMC1/PSMA3/NUP35/PSMD7/PSMD13/NFYB/PSMD8/PSMD4/EIF6/PSMD3/SLC35B4/ATP2B4/NFKB1/PSMB5/PSMA5/ARNT/PRKAG2/SEC13/PSMC6/PSMB4/PSMD12/VCP/PSMB2/PSMD11/NUP210/NUP188/USP7/PSMB1/ABCD1/PSMA2/NUP107/TPR
BP	GO:1903035	negative regulation of response to wounding	73	-0.637087	-1.49521	0.0123377	0.20791	0.191218	2363	tags=38%, list=19%, signal=31%	CPB2/SERPINF2/KNG1/CLDN19/SERPINE1/PRKCD/APOH/ADAMTS18/RTN4R/PTPRS/CERS2/SMAD3/FAP/F2/EPPK1/GP1BA/PROC/PLAU/CD9/EPHA4/APOE/PDGFA/SERPING1/PLG/WFDC1/MYOZ1/CLDN3/F11
BP	GO:0008406	gonad development	161	-0.570726	-1.47869	0.0124843	0.2099	0.193049	1863	tags=23%, list=15%, signal=20%	COL9A3/HOXA9/ADCYAP1/SRC/GATA4/SIRT1/KLHL10/WT1/SOD1/BAX/BRCA2/CYP19A1/SEMA3A/GNRH1/TNFSF10/REN/HESX1/BOK/HSD17B4/GATA3/ARRB1/FGF8/BMPR1B/INHBB/FZD4/SFRP2/GAS2/TLR3/MMP14/NTRK1/KITLG/PGR/NR0B1/DMC1/SOX9/WNT5A/AMH
BP	GO:0061912	selective autophagy	52	0.605382	1.55061	0.0125854	0.21002	0.193159	2818	tags=44%, list=22%, signal=35%	UFL1/VPS13D/UFM1/VPS13C/UBA5/CDC37/MFN2/ATG2A/UFC1/NOD1/ATG13/PHB2/MAP1LC3C/RAB7A/HUWE1/DDRGK1/TIGAR/TOMM7/TSC2/SPTLC1/HTT/RIPK2/KLHL3
BP	GO:0046165	alcohol biosynthetic process	131	-0.599422	-1.5174	0.0125867	0.21002	0.193159	1594	tags=31%, list=13%, signal=27%	APOA4/PTK2B/EBP/IPMK/SEC14L2/SOD1/PARK7/BMP5/PTH1R/PCBD1/ITPKB/DHCR24/CYP27B1/CYB5R3/APOA1/APOB/FASN/PDXP/CYP51A1/HMGCR/CYP27A1/TM7SF2/APOE/GCH1/P2RY6/ACLY/CLCN2/ASAH2/LSS/ACER2/IP6K2/MSMO1/IDI1/HSD17B7/DHCR7/CYP2R1/SQLE/SC5D/QDPR/CYP3A4
BP	GO:0016101	diterpenoid metabolic process	76	-0.6792	-1.60394	0.0126693	0.21002	0.193159	1163	tags=26%, list=9%, signal=24%	CRABP1/SCPEP1/RBP4/APOA1/APOB/ADH5/LRAT/RDH16/APOE/RDH11/APOC2/CYP4V2/ALDH8A1/DGAT2/DHRS3/OPN1SW/RDH8/CYP1A1/CYP3A4/PECR
BP	GO:0046661	male sex differentiation	112	-0.612657	-1.50342	0.0126805	0.21002	0.193159	1863	tags=24%, list=15%, signal=21%	WNT2B/COL9A3/HOXA9/GATA4/KLHL10/SMAD5/WT1/BAX/SEMA3A/TNFSF10/REN/BOK/HSD17B4/GATA3/FGF8/SFRP2/TLR3/MMP14/NTRK1/SYCP2/KITLG/HOXA13/NR0B1/SOX9/LHFPL2/WNT5A/AMH
BP	GO:0006488	dolichol-linked oligosaccharide biosynthetic process	18	0.773452	1.57997	0.0126838	0.21002	0.193159	1233	tags=39%, list=10%, signal=35%	DOLPP1/ALG12/ALG6/NUS1/ALG3/ALG1/DPAGT1
BP	GO:0045596	negative regulation of cell differentiation	482	-0.470078	-1.32196	0.0126945	0.21002	0.193159	1598	tags=22%, list=13%, signal=20%	BMP7/NMRK2/TBX1/TRIM11/NOCT/ID2/MAFB/ANXA1/HOXA9/ADCYAP1/NPR2/TLX3/RTN4R/SIRT1/PTPRS/PTK2B/SOX11/YY1/FBLN1/CDK6/PTHLH/HOXA2/HLX/CERS2/CDK5/DAB2IP/SMAD3/NODAL/HAND2/BMP5/ZFP36L2/FRS2/SMAD6/ITPKB/SPDEF/F2/FLCN/TACSTD2/CRP/SEMA7A/DLL1/NFATC4/RUNX3/C1QC/E2F1/GPR68/GPR137B/WNT10B/P2RY12/USH2A/SEMA3A/ADGRV1/PTN/GATA2/FZD7/ZC3H12A/SEMA3D/IGF2/VEGFC/AKIRIN1/MAP2/PIK3R1/GATA3/RORA/BRINP1/FGF13/TMEM176B/XD…
CC	GO:0005681	spliceosomal complex	166	0.475461	1.44005	0.0127125	0.21002	0.193159	2091	tags=22%, list=16%, signal=18%	WDR83/LGALS3/PRPF8/PTBP2/SNRNP200/SNRPN/CCDC12/RBM41/EIF4A3/PRPF31/DQX1/SNRNP48/HNRNPH1/SF3B3/UPF1/NCL/PPIL3/SF3B2/EFTUD2/PPIL1/HNRNPU/U2AF1L5/IK/PRPF19/SNRPG/SF3B1/WBP11/PRPF38A/SNRPA/SNRPB2/HNRNPA1/AQR/PPIH/SNRPF/SNRNP70/LSM6
BP	GO:0048286	lung alveolus development	36	-0.747826	-1.6066	0.01276	0.21002	0.193159	450	tags=22%, list=4%, signal=21%	SMPD3/PDGFA/PGR/ERRFI1/FOXF1/ABCA12/SFTPD/RC3H2
BP	GO:0048715	negative regulation of oligodendrocyte differentiation	10	-0.863329	-1.50689	0.0128225	0.21002	0.193159	599	tags=30%, list=5%, signal=29%	NF1/DUSP10/HES1
CC	GO:0005923	bicellular tight junction	100	-0.626758	-1.53587	0.012857	0.21002	0.193159	1294	tags=21%, list=10%, signal=19%	CXADR/ECT2/MICALL2/EPPK1/F11R/CLDN10/FRMPD2/LIN7A/SAPCD2/CLDN15/CYTH1/CLDN11/PARD6A/OCLN/CLDN34/POF1B/PLXDC1/PRKCZ/CLDN3/MXRA8/AOC1
BP	GO:0072676	lymphocyte migration	69	-0.676953	-1.57532	0.0128587	0.21002	0.193159	1100	tags=26%, list=9%, signal=24%	ADAM10/PTK2B/JAM2/AIF1/F11R/CRTAM/CKLF/GATA3/CXCL12/CD200/CXCL10/CD200R1/WNT5A/CXCL14/MSMP/CCL25/ECM1/CCR6
BP	GO:0048705	skeletal system morphogenesis	175	-0.563701	-1.47801	0.0128769	0.21002	0.193159	1946	tags=25%, list=15%, signal=21%	BMP7/TBX1/COL2A1/HOXA9/GNAS/PHOSPHO1/MATN1/HOXD3/SOX11/FREM1/HOXA2/SMAD3/NODAL/RAB23/TCF15/RAB33B/HOXB2/SMPD3/MSX2/WNT10B/TGFBR2/PCGF2/PRRX1/MAPK14/FGF8/NKX3-2/BMPR1B/TMEM119/SFRP2/LTF/MMP14/CSRNP1/COL1A1/PAX5/SERPINH1/COL11A1/SOX9/DHRS3/LHX1/MSX1/MMP2/HOXD4/OTOR
BP	GO:0030488	tRNA methylation	37	0.664705	1.59017	0.0128872	0.21002	0.193159	1568	tags=24%, list=12%, signal=21%	TRMT10A/MTO1/METTL2A/THADA/NSUN2/NSUN6/TRMT1L/TRMT61A/METTL6
BP	GO:0006465	signal peptide processing	10	0.857506	1.55217	0.0128898	0.21002	0.193159	1388	tags=60%, list=11%, signal=53%	HM13/FURIN/PCSK5/SPCS2/SPCS1/SEC11C
BP	GO:0071674	mononuclear cell migration	118	-0.616937	-1.53028	0.012959	0.210684	0.193769	2133	tags=34%, list=17%, signal=28%	MOSPD2/PIK3CG/CCL20/SERPINE1/TNFRSF14/HSD3B7/ANXA1/C5AR1/CXCR4/ADAM10/PTK2B/JAM2/BMP5/CSF1R/AIF1/TRPM2/PLCB1/F11R/CRTAM/CKLF/AKIRIN1/GATA3/FPR2/CXCL12/CD200/CXCL10/CMKLR1/CD200R1/LYN/SIRPA/EPS8/LGMN/S100A14/WNT5A/CXCL14/MSMP/CCL25/CSF1/ECM1/CCR6
BP	GO:0030855	epithelial cell differentiation	471	-0.474995	-1.33493	0.0130501	0.210813	0.193888	2103	tags=24%, list=17%, signal=21%	SERPINE1/MYO1E/CTSK/PPARG/RAB25/PLS1/DSG2/ABL1/BMP7/ST14/SLC44A4/KAZN/TBX1/MCOLN3/NPHS1/ID2/ANXA1/GPAT4/USH1C/MAFG/PCK1/AHI1/CTSB/SRC/B4GALT1/CXCR4/GATA4/WDPCP/KDM6B/PTPRS/SOX11/CCNO/CDK6/TMEM231/ONECUT1/WT1/GLI1/SOD1/SMAD3/NODAL/DSP/CASP6/TCF15/DACT2/BMP5/TMEM100/FRS2/MYCL/SPDEF/DLL1/SCUBE1/PLCB1/TGM5/CYP27B1/SLC9A3R1/F11R/WNT10B/PPHLN1/USH2A/PTN/FZD7/TRIOBP/FSTL1/PROC/ARX/FASN/HSD17B4/GATA3/FGF…
BP	GO:0042659	regulation of cell fate specification	12	-0.855586	-1.53081	0.0130783	0.210813	0.193888	935	tags=25%, list=7%, signal=23%	FZD7/SFRP2/WNT5A
BP	GO:0042407	cristae formation	13	0.826248	1.57201	0.013079	0.210813	0.193888	780	tags=31%, list=6%, signal=29%	ADCK1/DNAJC11/SPG7/IMMT
CC	GO:0030126	COPI vesicle coat	11	0.853456	1.57034	0.0130812	0.210813	0.193888	1582	tags=91%, list=12%, signal=80%	COPZ2/COPG2/TMED7/COPA/COPE/COPZ1/ARCN1/SCYL1/COPB1/COPB2
BP	GO:0009071	serine family amino acid catabolic process	11	-0.876864	-1.54451	0.0132021	0.212298	0.195254	340	tags=27%, list=3%, signal=27%	GCSH/CDO1/CSAD
BP	GO:0010812	negative regulation of cell-substrate adhesion	50	-0.725351	-1.62928	0.0133416	0.21386	0.19669	1319	tags=24%, list=10%, signal=22%	FAM107A/TACSTD2/FZD7/PIK3R1/FZD4/BCL6/ANGPT2/MMP14/ACER2/COL1A1/PLG/POSTN
BP	GO:0035278	miRNA mediated inhibition of translation	15	0.812659	1.59766	0.0134158	0.21386	0.19669	767	tags=33%, list=6%, signal=31%	AGO1/EIF6/EIF4G1/DDX6/RBM4
BP	GO:0040033	negative regulation of translation, ncRNA-mediated	15	0.812659	1.59766	0.0134158	0.21386	0.19669	767	tags=33%, list=6%, signal=31%	AGO1/EIF6/EIF4G1/DDX6/RBM4
BP	GO:0045974	regulation of translation, ncRNA-mediated	15	0.812659	1.59766	0.0134158	0.21386	0.19669	767	tags=33%, list=6%, signal=31%	AGO1/EIF6/EIF4G1/DDX6/RBM4
MF	GO:0008139	nuclear localization sequence binding	19	0.765106	1.59983	0.0134579	0.21386	0.19669	1501	tags=32%, list=12%, signal=28%	CABP1/IPO4/IPO5/NUP98/NUP153/KPNB1
BP	GO:0030834	regulation of actin filament depolymerization	39	-0.756275	-1.65347	0.0135272	0.21386	0.19669	1073	tags=31%, list=8%, signal=28%	TMOD4/TMOD3/TRIOBP/PDXP/SPTBN5/GSN/SWAP70/ACTN2/EPS8/TMOD1/AVIL/TWF2
BP	GO:0032722	positive regulation of chemokine production	43	-0.741043	-1.63512	0.0135272	0.21386	0.19669	1363	tags=26%, list=11%, signal=23%	CSF1R/AIF1/TIRAP/IL17RA/MAVS/ALOX15B/TLR3/CHIA/WNT5A/LBP/POSTN
BP	GO:0042330	taxis	485	-0.476081	-1.33945	0.013531	0.21386	0.19669	2325	tags=24%, list=18%, signal=20%	EVL/DOCK4/PREX1/STX3/YTHDF1/CNR2/PLA2G1B/DUSP3/SLIT3/DAG1/GFRA2/ACKR4/TNFSF11/IL17RC/TMSB4X/NOG/MOSPD2/PIK3CG/CCL20/SERPINE1/PRKCD/ACKR3/RAC2/PLD1/EPHA3/FGF1/EFNA2/BMP7/HSD3B7/EPHA6/ANXA1/C5AR1/SRC/EPHB3/CXCR4/CDH4/ADAM10/RALA/PTK2B/CSF3R/HOXA2/CDK5/SH3KBP1/HBEGF/SMAD3/CSF1R/AIF1/TIRAP/KALRN/FRS2/VLDLR/CXADR/TRPM2/SEMA7A/P2RY12/DPEP1/LOX/COLEC10/SEMA3A/PTN/APOA1/PLXNA4/ARX/SEMA3D/CKLF/VEGFC/AKIRI…
BP	GO:0051384	response to glucocorticoid	109	-0.613664	-1.50658	0.013572	0.21391	0.196736	1389	tags=18%, list=11%, signal=16%	TAT/CFLAR/ZFP36L2/FAM107A/FBXO32/DDIT4/CPS1/SPARC/FIBIN/CPN1/ERRFI1/CDO1/FLT3/BGLAP/EPO/HSD3B1/GLB1/UCP3/BCHE/HSD11B2
BP	GO:0007596	blood coagulation	253	-0.52599	-1.41749	0.0135922	0.21391	0.196736	2123	tags=29%, list=17%, signal=25%	PIK3CG/SERPINE1/PRKCD/HBG2/ADORA2A/F2R/APOH/GNA13/TYRO3/ADAMTS18/GNAS/GP5/MAFG/CD40/SRC/ENTPD1/AK3/GATA4/ACTB/ANXA5/MERTK/PRKAR2B/FBLN1/GNG2/CBX5/PLA2G4A/FAP/F2/PROZ/FN1/SCUBE1/F11R/RAB27A/P2RY12/PRCP/SLC4A1/HMG20B/GP9/DOCK11/BLOC1S3/GATA2/GP1BB/GP1BA/PROC/F9/PLAU/CD9/PIK3R1/GATA3/ARRB1/SERPINA10/PIK3R6/TEC/TEC/LYN/SERPINA1/PDPK1/RBSN/BLK/A2M/APOE/PDGFA/SERPIND1/COL1A1/SERPING1/PLG/COL1A2/ST3GAL4…
MF	GO:0005343	organic acid:sodium symporter activity	24	-0.817565	-1.64227	0.0138158	0.216966	0.199547	233	tags=46%, list=2%, signal=45%	SLC6A1/SLC6A13/SLC6A9/SLC13A3/SLC6A15/SLC1A2/SLC6A6/SLC13A5/SLC10A1/SLC6A7/SLC10A2
BP	GO:0061041	regulation of wound healing	105	-0.633832	-1.55666	0.0138604	0.217205	0.199767	2128	tags=30%, list=17%, signal=25%	CLDN19/SERPINE1/PRKCD/F2R/ITGB1/APOH/PLPP3/ANXA1/ADAMTS18/CXCR4/HBEGF/SMAD3/FAP/F2/EPPK1/CADM4/GP1BA/PROC/PLAU/CD9/APOE/PDGFA/OCLN/SERPING1/PLG/WFDC1/ST3GAL4/MYOZ1/CAV1/CLDN3/F11
BP	GO:0006633	fatty acid biosynthetic process	114	-0.62544	-1.53843	0.0139195	0.217296	0.19985	962	tags=16%, list=8%, signal=15%	PTGES/HACD2/APOA1/CBR4/FASN/ALOX15B/LIPH/PLA2G3/ACLY/ASAH2/APOC2/TBXAS1/CYP1A1/CYP3A4/PECR/ACSS2/FADS2/SCD5
BP	GO:0030042	actin filament depolymerization	42	-0.743107	-1.63828	0.0139251	0.217296	0.19985	1073	tags=29%, list=8%, signal=26%	TMOD4/TMOD3/TRIOBP/PDXP/SPTBN5/GSN/SWAP70/ACTN2/EPS8/TMOD1/AVIL/TWF2
BP	GO:0030509	BMP signaling pathway	115	-0.610426	-1.5053	0.0139791	0.217678	0.200202	1570	tags=28%, list=12%, signal=25%	FBXL15/SMAD7/NOG/PPARG/PDCD4/ABL1/BMP7/GATA4/SOX11/SMAD5/SMAD1/SMAD3/NODAL/SFRP5/BMP5/TMEM100/SMPD3/SMAD6/FSTL1/CRB2/BMPR1B/VWC2L/SFRP2/HOXA13/HES1/SMAD9/WNT5A/SOSTDC1/HTRA3/MSX1/HTRA1/AMH
BP	GO:0034248	regulation of cellular amide metabolic process	348	0.401111	1.3072	0.0140357	0.2181	0.20059	2446	tags=30%, list=19%, signal=25%	PATL2/XRN1/AGO1/IGF2BP1/OGFOD1/GCN1/LRPPRC/TMED10/TSC1/UHMK1/CALR/EIF6/RPL5/EIF2B1/HABP4/EIF4H/LTN1/SRP9/DNAJC1/EIF4G1/THBS1/COA3/DDX6/DHX9/EIF5B/TPR/VIM/DNAJC3/ELAVL1/RBM4/TACO1/IMPACT/LARP1/TMED2/EIF4A3/C1QBP/HNRNPD/TRAP1/EIF3C/GLE1/MRPS27/MTIF2/KHSRP/CPEB2/UPF1/CSDE1/NCL/NTRK2/TIA1/PA2G4/CNOT11/LARP4B/NANOS1/EIF2A/RBM4B/BCL3/CDK4/SHMT1/RPS9/GSPT1/NSUN5/EIF3E/IGF2BP2/EIF4G3/DPH3/PER1/PRKDC/CDC1…
MF	GO:0004180	carboxypeptidase activity	30	-0.775835	-1.61951	0.0141973	0.220147	0.202473	1130	tags=30%, list=9%, signal=27%	SCPEP1/PRCP/CPA2/CPN1/CPXM1/CPVL/ACE/CPZ/CPA6
BP	GO:0018108	peptidyl-tyrosine phosphorylation	279	-0.52178	-1.42247	0.014244	0.220408	0.202713	2013	tags=21%, list=16%, signal=18%	EPHA3/CLK4/TNFRSF14/ABL1/ANGPT4/TYRO3/EPHA6/HPX/MAP2K7/CD40/SH3BP5L/SRC/EPHB3/ADORA1/MERTK/PTK2B/GHR/CSK/HBEGF/UNC119/CSF1R/ALK/BTK/IGF1R/AGT/HCK/CADM4/FCGR1A/TTN/MATK/IGF2/NOX4/FGF8/AATK/PRLR/TEC/TEC/LYN/ANGPT1/SFRP2/EFNA1/BTC/BLK/EPHA4/DDR1/NTRK1/PDGFA/KITLG/ERRFI1/HES1/HGF/ACE/FLT3/NTF3/NRP1/CAV1/EPO/MAP2K1/PRKCZ/MUSK
BP	GO:0007599	hemostasis	257	-0.525073	-1.41749	0.0142884	0.220633	0.202919	2123	tags=29%, list=17%, signal=25%	PIK3CG/SERPINE1/PRKCD/HBG2/ADORA2A/F2R/APOH/GNA13/TYRO3/ADAMTS18/GNAS/GP5/MAFG/CD40/SRC/ENTPD1/AK3/GATA4/ACTB/ANXA5/MERTK/PRKAR2B/FBLN1/GNG2/CBX5/PLA2G4A/FAP/F2/PROZ/FN1/SCUBE1/F11R/RAB27A/P2RY12/PRCP/SLC4A1/HMG20B/GP9/DOCK11/BLOC1S3/GATA2/GP1BB/GP1BA/PROC/F9/PLAU/CD9/PIK3R1/GATA3/ARRB1/AVPR2/SERPINA10/PIK3R6/TEC/TEC/LYN/SERPINA1/PDPK1/RBSN/BLK/A2M/APOE/PDGFA/SERPIND1/COL1A1/SERPING1/PLG/COL1A2/S…
CC	GO:0005775	vacuolar lumen	137	-0.568075	-1.43898	0.014322	0.22069	0.202972	1907	tags=36%, list=15%, signal=31%	PRKCD/CTSK/LAMP2/HSPA8/CTSG/EPDR1/STK11IP/GPC6/NPC2/CTSB/GUSB/CTSA/HEXB/GAA/TTR/PLAC8/ARSB/GLA/FRK/CTSS/CTSD/PLBD2/NCAN/CYB5R3/BPI/CTSC/GNS/APOB/HEBP2/VCAN/GM2A/AGA/PSAP/IDS/PPT1/SGSH/PRELP/ACLY/LIPA/RNASET2/LGMN/LYZ/CTSV/MAN2B1/ARSA/GLB1/CSPG5/DCN/LUM
MF	GO:1901681	sulfur compound binding	190	-0.537608	-1.41847	0.014475	0.222193	0.204354	1476	tags=18%, list=12%, signal=17%	FGFBP3/HBEGF/EVA1C/CHST15/F2/ZNF146/FN1/PTGES/LXN/PTN/FSTL1/RSPO1/APOB/SELL/PCOLCE2/SERPINA10/CXCL10/LIPH/LTF/PGF/NDNF/APOE/PRELP/SERPIND1/COL11A1/SMOC1/CRISPLD2/NRP1/ITGA2/ANOS1/HPSE2/NELL2/AOC1/F11/POSTN
BP	GO:0030520	intracellular estrogen receptor signaling pathway	49	0.627455	1.58833	0.0144797	0.222193	0.204354	1931	tags=31%, list=15%, signal=26%	UFL1/MED1/UFSP2/ZNF366/UFM1/PADI2/ESR1/UBA5/TAF7/ISL1/PHB2/CARM1/CNOT1/NCOA4/DDRGK1
BP	GO:0046394	carboxylic acid biosynthetic process	229	-0.533504	-1.43112	0.0145296	0.222218	0.204377	1214	tags=17%, list=10%, signal=16%	RIMKLA/GAD1/ACOT8/PTGES/GADL1/GOT2/HACD2/CLN3/APOA1/GGT1/CBR4/FASN/HSD17B4/ALOX15B/LIPH/CYP46A1/HAAO/CYP27A1/PLA2G3/ACCS/ACMSD/ACLY/ASAH2/APOC2/ALDH8A1/TBXAS1/ABCB11/GGT5/BHMT/NAGS/CYP1A1/MALRD1/DPYD/CYP3A4/PECR/ACSS2/FADS2/GATM/SCD5
BP	GO:0006882	cellular zinc ion homeostasis	19	0.757633	1.58421	0.0145717	0.222218	0.204377	211	tags=21%, list=2%, signal=21%	SLC39A14/SLC30A5/SLC39A10/SLC39A7
BP	GO:0055069	zinc ion homeostasis	19	0.757633	1.58421	0.0145717	0.222218	0.204377	211	tags=21%, list=2%, signal=21%	SLC39A14/SLC30A5/SLC39A10/SLC39A7
BP	GO:2001135	regulation of endocytic recycling	10	-0.859442	-1.50011	0.0146701	0.223204	0.205284	658	tags=40%, list=5%, signal=38%	RAB11B/ACTN2/PLA2G3/NDRG4
BP	GO:0007005	mitochondrion organization	409	0.378673	1.24197	0.0147359	0.223204	0.205284	2727	tags=27%, list=21%, signal=22%	HSPD1/ADCK1/PMPCB/PET117/HAX1/FOXRED1/MSTO1/HSP90AA1/VPS13D/HSPA9/PITRM1/TRAK2/CHCHD2/DNAJC11/SAE1/ACAA2/CLN8/OPA1/VPS13C/LRRK2/HSPA4/COA3/FBXW7/COX18/LMAN1/SPG7/CISD2/VPS13A/SDHAF1/IMMT/MIPEP/TACO1/TSPO/TOMM20/ARMC1/CYCS/CDC37/TFRC/MFN2/PDE2A/ATG2A/SSBP1/GHITM/SLIRP/ATG13/NDUFV2/TIMM8B/PHB2/PRELID1/HK2/COX17/SIRT7/MLLT11/NDUFV1/SAMM50/HCFC1/MAP1LC3C/PMPCA/BCS1L/LONP1/IMMP1L/VDAC2/PPRC1/NRF1/HUWE…
BP	GO:0030199	collagen fibril organization	44	-0.734635	-1.61908	0.0147517	0.223204	0.205284	617	tags=23%, list=5%, signal=22%	LOX/SFRP2/COL1A1/SERPINH1/COL11A1/AEBP1/COL1A2/LOXL3/MMP11/LUM
BP	GO:0033617	mitochondrial cytochrome c oxidase assembly	19	0.755206	1.57913	0.0147573	0.223204	0.205284	1678	tags=32%, list=13%, signal=27%	PET117/COA3/COX18/TACO1/COX17/BCS1L
BP	GO:0009074	aromatic amino acid family catabolic process	18	-0.828294	-1.59284	0.0148361	0.223938	0.205959	1693	tags=61%, list=13%, signal=53%	HGD/IDO2/PAH/TAT/PCBD1/ASRGL1/HAAO/GSTZ1/ACMSD/IL4I1/QDPR
BP	GO:0030282	bone mineralization	90	-0.624394	-1.49933	0.0148946	0.224361	0.206348	1946	tags=30%, list=15%, signal=26%	BMP7/GPM6B/PHOSPHO1/MATN1/PTK2B/PTHLH/SMAD3/SMPD3/PTH1R/CYP27B1/WNT10B/SLC8A1/LOX/ADGRV1/PTN/EIF2AK3/PHEX/BMPR1B/ANKH/TMEM119/LTF/COL1A2/SOX9/BGLAP/AHSG/SNX10/ECM1
BP	GO:0014910	regulation of smooth muscle cell migration	52	-0.718797	-1.61798	0.014938	0.224557	0.206528	857	tags=15%, list=7%, signal=14%	NOX4/PLAU/PDGFA/NDRG4/ACE/NRP1/ITGA2/POSTN
MF	GO:0051015	actin filament binding	163	-0.560235	-1.45363	0.0150415	0.225653	0.207537	2356	tags=34%, list=19%, signal=28%	FMNL2/CORO1C/MYH11/BLOC1S6/MYO6/XIRP2/TPM4/CORO2B/MYO1E/MARCKSL1/MYO1H/LCP1/PLS1/TNNC1/ABL1/AJUBA/MYO10/PSTPIP1/USH1C/MYH7/MYH6/MISP/PPP1R9A/AIF1/MYL4/AIF1L/MICALL2/TMOD4/BIN1/HIP1R/TPM3/MYOM2/TTN/TRIOBP/SHTN1/EEF2/PKNOX2/FSCN1/ANTXR1/SPTBN5/GSN/ACTN2/MYH1/ARPC1B/EZR/GAS2/MYO7A/TNNC2/MYH3/TMOD1/POF1B/AVIL/TWF2/MYH2/CLMN
BP	GO:0000096	sulfur amino acid metabolic process	33	-0.776024	-1.6364	0.0151035	0.226124	0.20797	1155	tags=24%, list=9%, signal=22%	GADL1/DPEP1/GGT1/NOX4/CPS1/CDO1/BHMT/CSAD
BP	GO:0050865	regulation of cell activation	372	-0.483971	-1.34188	0.0153466	0.228384	0.210048	1514	tags=21%, list=12%, signal=19%	TNFRSF13B/SOX11/HLX/SH3KBP1/PKN1/SOD1/CSK/PLA2G4A/ZFP36L2/PARP3/AIF1/TIRAP/ITPKB/F2/BTK/RUNX3/MALT1/CD22/GPR137B/F11R/GRAP2/CRTAM/BPI/CLEC4D/CTSC/GNRH1/CD84/BLOC1S3/GATA2/ATP11C/ZC3H12A/HLA-DPB1/TGFBR2/IGF2/CD9/PIK3R1/GATA3/RORA/ITGAM/CD200/NRARP/PIK3R6/BCL10/TEC/TEC/TNFSF13B/LYN/SIRPA/BCL6/TMIGD2/DUSP10/SLC46A2/PDPK1/TESPA1/PLA2G3/BLK/NDFIP1/MMP14/APOE/PDGFA/IGLL1/CD209/HLA-DPA1/HES1/FOXF1/CD276…
BP	GO:0001776	leukocyte homeostasis	60	-0.691473	-1.57828	0.0153473	0.228384	0.210048	1974	tags=30%, list=16%, signal=25%	GPAM/ABL1/ANXA1/DOCK10/MERTK/TNFRSF13B/PKN1/BAX/ITPKB/DOCK11/BCL10/TNFSF13B/LYN/SLC46A2/KITLG/FLT3/MPL/RC3H2
BP	GO:0030500	regulation of bone mineralization	59	-0.695789	-1.58449	0.0153473	0.228384	0.210048	1946	tags=34%, list=15%, signal=29%	ATRAID/BMP7/GPM6B/PHOSPHO1/MATN1/PTK2B/SMAD3/CYP27B1/WNT10B/SLC8A1/ADGRV1/PTN/BMPR1B/ANKH/TMEM119/LTF/SOX9/BGLAP/AHSG/ECM1
BP	GO:0072678	T cell migration	40	-0.730076	-1.60218	0.0154247	0.229074	0.210683	1357	tags=32%, list=11%, signal=29%	PIK3CG/CCL20/TNFRSF14/ADAM10/AIF1/F11R/CXCL12/CD200/CXCL10/CD200R1/WNT5A/ECM1/CCR6
BP	GO:0006883	cellular sodium ion homeostasis	14	-0.863755	-1.5734	0.0154812	0.229311	0.210901	1085	tags=29%, list=9%, signal=26%	SLC8A1/NEDD4L/ATP1A2/C7
BP	GO:0042476	odontogenesis	95	-0.632339	-1.53063	0.0155028	0.229311	0.210901	827	tags=13%, list=7%, signal=12%	PHEX/FGF8/CA2/COL1A1/COL1A2/BGLAP/PERP/SOSTDC1/MSX1/SNX10/CSF1/HTRA1
MF	GO:0016628	oxidoreductase activity, acting on the CH-CH group of donors, NAD or NADP as acceptor	23	-0.795199	-1.58454	0.0155582	0.229671	0.211232	1205	tags=30%, list=9%, signal=28%	DHCR24/FASN/TM7SF2/TBXAS1/DHCR7/DPYD/PECR
BP	GO:0042246	tissue regeneration	57	-0.698947	-1.57886	0.0156082	0.229725	0.211281	1194	tags=29%, list=9%, signal=27%	CCNB1/EPPK1/WNT10B/NINJ1/PTN/FZD7/TGFBR2/TM4SF4/AKIRIN1/CD9/GSN/TEC/TEC/DUSP10/MYOZ1/ENO3/POSTN
MF	GO:0016758	transferase activity, transferring hexosyl groups	144	0.471702	1.40399	0.0156638	0.229725	0.211281	1369	tags=19%, list=11%, signal=18%	B3GAT2/SDF2L1/POMT1/STT3B/DPY19L3/UGGT2/UGGT1/GALNT9/PLOD3/EOGT/ALG12/STT3A/DPM1/UGT1A1/ALG5/RPN2/ALG6/B3GNT3/ALG3/MGAT4A/PIGB/B3GNT7/ALG1/GALNT10/GALNT5/EXTL2/OSTC/FUT11
BP	GO:0006814	sodium ion transport	178	-0.558022	-1.46255	0.0156703	0.229725	0.211281	1374	tags=16%, list=11%, signal=14%	FXYD3/ASIC2/PKD2/HECW1/SLC34A2/TRPM2/SLC8A3/SLC3A2/SLC9A3R1/SLC8A1/SCN8A/FGF13/SLMAP/NEDD4L/CHP1/STOM/ATP1A2/SLC5A2/SLC6A6/SLC6A19/ABCB11/SLC13A5/SLC10A1/SLC6A7/SLC10A2/SLC6A18/SLC5A9/SLC13A4
BP	GO:0031214	biomineral tissue development	115	-0.607169	-1.49727	0.0156864	0.229725	0.211281	1946	tags=26%, list=15%, signal=22%	BMP7/GPM6B/TBX1/PHOSPHO1/MATN1/PTK2B/PTHLH/SMAD3/SMPD3/PTH1R/CYP27B1/WNT10B/SLC8A1/LOX/ADGRV1/PTN/EIF2AK3/PHEX/BMPR1B/ANKH/OTOL1/TMEM119/LTF/COL1A1/COL1A2/SOX9/BGLAP/AHSG/SNX10/ECM1
MF	GO:0016829	lyase activity	155	-0.56338	-1.45825	0.0157321	0.229938	0.211478	1309	tags=21%, list=10%, signal=19%	TKFC/PCBD1/APMAP/GAD1/GADL1/ADCY1/ADCY8/HACD2/GGACT/ENO4/ALDOA/NPR1/FASN/POLQ/HSD17B4/ME2/HAL/PM20D1/CA2/ACMSD/EHHADH/CA6/NPL/RNASET2/UROC1/CA8/TBXAS1/ETNPPL/FAHD2A/ENO3/CYP1A1/CSAD
BP	GO:1903019	negative regulation of glycoprotein metabolic process	12	-0.848408	-1.51796	0.0158239	0.230468	0.211965	1622	tags=67%, list=13%, signal=58%	ITM2B/CST3/HBEGF/ACOT8/TMEM59/ITM2A/BACE2/ACER2
BP	GO:0000731	DNA synthesis involved in DNA repair	43	0.60615	1.50596	0.0158308	0.230468	0.211965	549	tags=9%, list=4%, signal=9%	TEX12/VCP/REV3L/NPLOC4
CC	GO:0012507	ER to Golgi transport vesicle membrane	45	0.618468	1.54514	0.0159205	0.231052	0.212502	1468	tags=31%, list=12%, signal=28%	SEC24D/SEC16A/PDCD6/TMED10/SEC16B/SEC13/LMAN1/SEC22B/TMED7/SEC31A/TMED2/SEC23B/USO1/PEF1
BP	GO:0051016	barbed-end actin filament capping	17	-0.846376	-1.60729	0.0159398	0.231052	0.212502	925	tags=29%, list=7%, signal=27%	TRIOBP/GSN/EPS8/AVIL/TWF2
MF	GO:0019783	ubiquitin-like protein-specific protease activity	18	0.764628	1.56194	0.0160167	0.231052	0.212502	681	tags=17%, list=5%, signal=16%	DESI1/UFSP2/COPS4
BP	GO:0051571	positive regulation of histone H3-K4 methylation	18	0.763734	1.56012	0.0160167	0.231052	0.212502	346	tags=11%, list=3%, signal=11%	GCG/KMT2A
BP	GO:0075733	intracellular transport of virus	51	0.601596	1.53958	0.0160274	0.231052	0.212502	2630	tags=37%, list=21%, signal=30%	NUP205/NUP35/SEC13/NUP210/NUP188/NUP107/TPR/NUP98/NUP155/NUP153/KPNB1/DYNLT1/NUP160/NUP85/NUP88/NUP133/RAN/NUP93/NUP54
BP	GO:0051788	response to misfolded protein	20	0.767418	1.63277	0.0161217	0.231957	0.213335	438	tags=25%, list=3%, signal=24%	SDF2L1/DERL1/UGGT2/UGGT1/VCP
BP	GO:2000147	positive regulation of cell motility	420	-0.492409	-1.37593	0.0162089	0.232577	0.213905	2406	tags=28%, list=19%, signal=23%	RIN2/F10/EPB41L5/NEDD9/PLCG2/DAPK2/DOCK4/PREX1/TCAF2/RHOB/IL1R1/GRN/FOXP1/SNAI2/ARF6/TACR3/ANGPTL3/TMSB4X/MOSPD2/PIK3CG/CCL20/HMOX1/SERPINE1/ACKR3/RAC2/RAB25/F2R/MAZ/ITGB1/PLPP3/FGF1/TNFRSF14/ABL1/BMP7/ANGPT4/PIK3R3/ANXA1/CLDN7/CD40/ITGA6/C5AR1/SRC/CXCR4/GNAI2/ADAM10/SIRT1/TERT/SPOCK2/PTK2B/JAM2/ONECUT1/DAB2IP/HBEGF/SMAD3/CSF1R/AIF1/TIRAP/FAM107A/ELP6/CTSH/FN1/SEMA7A/IGF1R/AGT/SLC8A1/P2RY12/SEMA3…
BP	GO:0002768	immune response-regulating cell surface receptor signaling pathway	283	0.400652	1.28104	0.0162278	0.232577	0.213905	1104	tags=15%, list=9%, signal=14%	PSMC4/NFKBID/PSMD14/PSMD2/RELB/PSMC3/PSMD6/PSMD1/PSMC5/PSMC2/SLC39A10/HSP90AA1/PSMC1/PSMA3/PSMD7/PSMD13/PSMD8/PSMD4/PSMD3/NFKB1/PSMB5/LGALS3/PSMA5/PSMC6/PSMB4/PSMD12/PSMB2/ITK/EIF2B1/PSMD11/PRKCQ/PSMB1/PSMA2/ARPC5/TAB1/PSMA1/PSMA6/IKBKB/CR1/NR4A3/PLPP4/CCR7/PSMA4
MF	GO:0016229	steroid dehydrogenase activity	21	-0.826743	-1.62493	0.0163365	0.233681	0.21492	846	tags=29%, list=7%, signal=27%	HSD17B4/RDH16/HSD17B7/HSD3B1/RDH8/HSD11B2
BP	GO:0030049	muscle filament sliding	31	-0.766465	-1.59699	0.0165306	0.235091	0.216217	2117	tags=68%, list=17%, signal=57%	TPM4/TNNC1/MYH7/MYH6/TNNI1/MYL2/MYL1/TNNT1/MYL4/TNNT2/TPM3/TTN/ACTN2/TNNC2/MYH3/TMOD1/MYBPC1/MYBPC2/TNNT3/MYH2/TNNI2
BP	GO:0030835	negative regulation of actin filament depolymerization	31	-0.767344	-1.59882	0.0165306	0.235091	0.216217	1073	tags=32%, list=8%, signal=30%	TMOD4/TMOD3/TRIOBP/SPTBN5/GSN/SWAP70/EPS8/TMOD1/AVIL/TWF2
BP	GO:0033275	actin-myosin filament sliding	31	-0.766465	-1.59699	0.0165306	0.235091	0.216217	2117	tags=68%, list=17%, signal=57%	TPM4/TNNC1/MYH7/MYH6/TNNI1/MYL2/MYL1/TNNT1/MYL4/TNNT2/TPM3/TTN/ACTN2/TNNC2/MYH3/TMOD1/MYBPC1/MYBPC2/TNNT3/MYH2/TNNI2
BP	GO:0008535	respiratory chain complex IV assembly	22	0.737064	1.59564	0.0165934	0.235531	0.216621	1678	tags=27%, list=13%, signal=24%	PET117/COA3/COX18/TACO1/COX17/BCS1L
BP	GO:0006446	regulation of translational initiation	67	0.564708	1.51636	0.016726	0.236843	0.217828	1958	tags=34%, list=15%, signal=29%	UHMK1/EIF2B1/HABP4/EIF4H/EIF4G1/EIF5B/TPR/DNAJC3/RBM4/IMPACT/LARP1/TMED2/GLE1/MTIF2/CSDE1/EIF3E/EIF4G3/CDC123/NCBP2/EIF4B/DHX29/POLR2D/EIF5
BP	GO:0045948	positive regulation of translational initiation	22	0.736456	1.59432	0.0167809	0.236843	0.217828	1935	tags=36%, list=15%, signal=31%	UHMK1/HABP4/DNAJC3/IMPACT/LARP1/CDC123/DHX29/POLR2D
BP	GO:0051446	positive regulation of meiotic cell cycle	14	-0.8596	-1.56583	0.0167821	0.236843	0.217828	1144	tags=36%, list=9%, signal=33%	PLCB1/TOPAZ1/MEIOC/WNT5A/MSX1
BP	GO:0010833	telomere maintenance via telomere lengthening	69	0.551608	1.48693	0.0168767	0.236937	0.217914	2613	tags=39%, list=21%, signal=31%	XRN1/HSP90AA1/CCT3/CCT6A/CCT4/PRKCQ/TEN1/PTGES3/CCT8/ATR/RFC1/NHP2/HNRNPU/CCT7/RAD51/CCT5/TELO2/TERF2IP/HNRNPA1/PNKP/ERCC4/TNKS/NAT10/NEK7/PINX1/TCP1/DHX36
BP	GO:0000462	maturation of SSU-rRNA from tricistronic rRNA transcript (SSU-rRNA, 5.8S rRNA, LSU-rRNA)	34	0.666336	1.56368	0.0168897	0.236937	0.217914	3311	tags=56%, list=26%, signal=41%	HEATR1/NOP14/BMS1/UTP3/BYSL/UTP20/RRS1/RRP36/NOL10/KRI1/RPS21/GTF2H5/ERCC2/ABT1/TSR2/RPS19/NOP9/RPS16/WDR46
BP	GO:1900024	regulation of substrate adhesion-dependent cell spreading	48	-0.692708	-1.55409	0.0169131	0.236937	0.217914	234	tags=15%, list=2%, signal=14%	RAC3/TACSTD2/APOA1/TRIOBP/NRP1/CSPG5/POSTN
MF	GO:0015459	potassium channel regulator activity	41	-0.722906	-1.59077	0.0169172	0.236937	0.217914	761	tags=20%, list=6%, signal=18%	KCNAB1/NEDD4L/CHP1/DPP10/LRRC52/CAV1/SGK2/PRKCZ
BP	GO:0016441	posttranscriptional gene silencing	118	0.478176	1.38663	0.0169521	0.236976	0.217951	1370	tags=19%, list=11%, signal=18%	NUP205/AGO1/NUP35/EIF6/DICER1/SEC13/NUP210/EIF4G1/NUP188/DDX6/DHX9/MAP2K2/NUP107/TPR/ESR1/ELAVL1/RBM4/NUP98/HENMT1/HELZ/PPP3CA/NUP155/NUP153
MF	GO:0000030	mannosyltransferase activity	20	0.765778	1.62928	0.0170429	0.237795	0.218704	1094	tags=40%, list=9%, signal=37%	SDF2L1/POMT1/DPY19L3/ALG12/DPM1/ALG3/PIGB/ALG1
BP	GO:0006954	inflammatory response	467	-0.47022	-1.31985	0.0171638	0.239015	0.219826	2283	tags=30%, list=18%, signal=26%	TGM2/HSPG2/IL1R1/GRN/CNR2/FOXP1/CYBB/KNG1/SCYL3/TNFSF11/IL17RC/IL5RA/MEFV/TMSB4X/NT5E/PIK3CG/IL1R2/CCL20/HMOX1/SERPINE1/PRKCD/PPARG/ADORA2A/F2R/PDCD4/ITGB1/ORM1/TLR9/CMA1/BLNK/TLR1/TYRO3/ANXA1/TNFRSF1B/PSTPIP1/PTGER4/ADCYAP1/CD40/GHSR/C5AR1/B4GALT1/CXCR4/ADORA1/NLRX1/KDM6B/FOLR2/ADORA3/SMAD1/DAB2IP/SOD1/DNASE1L3/SMAD3/PARK7/IGFBP4/CSF1R/AIF1/C4B/TIRAP/C1QTNF3/F2/BTK/CRP/FN1/SEMA7A/NFATC4/AGT/PTGE…
BP	GO:0048872	homeostasis of number of cells	196	-0.536801	-1.41597	0.0171951	0.239015	0.219826	2105	tags=27%, list=17%, signal=22%	HMOX1/SASH3/F2R/KRAS/ILDR2/GPAM/ABL1/JMJD6/MAFB/ANXA1/TMEM14C/DOCK10/MERTK/KLHL10/TNFRSF13B/CDK6/MAEA/SMAD5/PKN1/ALAS2/SOD1/BAX/ITPKB/RAC3/EPAS1/SLC4A1/TMOD3/DOCK11/GATA2/FSTL1/GATA3/MAPK14/ETS1/BCL10/CDH2/SPI1/TNFSF13B/LYN/BCL6/SLC46A2/RASSF2/KITLG/LIPA/KLF13/FLT3/SOX9/MPL/KAT7/SOX4/EPO/RC3H2/CSF1
CC	GO:0015030	Cajal body	48	0.613777	1.54416	0.0172527	0.239365	0.220148	1636	tags=23%, list=13%, signal=20%	LSM10/HABP4/FAM118B/PRPF31/FBL/SMN1/NHP2/EFTUD2/COIL/ICE2/ANGEL2
BP	GO:0018212	peptidyl-tyrosine modification	281	-0.520246	-1.41854	0.0173258	0.239929	0.220666	2013	tags=21%, list=16%, signal=18%	EPHA3/CLK4/TNFRSF14/ABL1/ANGPT4/TYRO3/EPHA6/HPX/MAP2K7/CD40/SH3BP5L/SRC/EPHB3/ADORA1/MERTK/PTK2B/GHR/CSK/HBEGF/UNC119/CSF1R/ALK/BTK/IGF1R/AGT/HCK/CADM4/FCGR1A/TTN/MATK/IGF2/NOX4/FGF8/AATK/PRLR/TEC/TEC/LYN/ANGPT1/SFRP2/EFNA1/BTC/BLK/EPHA4/DDR1/NTRK1/PDGFA/KITLG/ERRFI1/HES1/HGF/ACE/FLT3/NTF3/NRP1/CAV1/EPO/MAP2K1/PRKCZ/MUSK
BP	GO:0007530	sex determination	11	-0.866679	-1.52657	0.0174676	0.241439	0.222055	1478	tags=45%, list=12%, signal=40%	WT1/GNRH1/NR0B1/SOX9/AMH
BP	GO:0033146	regulation of intracellular estrogen receptor signaling pathway	35	0.664605	1.56574	0.0176508	0.243515	0.223965	1931	tags=34%, list=15%, signal=29%	UFL1/MED1/UFSP2/ZNF366/UFM1/ESR1/UBA5/ISL1/PHB2/CARM1/CNOT1/DDRGK1
MF	GO:0030020	extracellular matrix structural constituent conferring tensile strength	34	-0.745302	-1.57805	0.017816	0.245336	0.22564	722	tags=21%, list=6%, signal=19%	COL6A6/COL6A1/COL1A1/COL11A1/COL1A2/COL6A2/COL8A2
CC	GO:0042470	melanosome	97	0.507242	1.44455	0.0179379	0.245999	0.226249	1059	tags=20%, list=8%, signal=18%	OCA2/PDIA6/ANXA2/HSP90B1/HSP90AA1/PDIA4/TMED10/CANX/HSPA5/RAB2A/PRDX1/RAB27B/CCT4/SEC22B/SND1/TFRC/GPNMB/GPR143/CLTC
CC	GO:0048770	pigment granule	97	0.507242	1.44455	0.0179379	0.245999	0.226249	1059	tags=20%, list=8%, signal=18%	OCA2/PDIA6/ANXA2/HSP90B1/HSP90AA1/PDIA4/TMED10/CANX/HSPA5/RAB2A/PRDX1/RAB27B/CCT4/SEC22B/SND1/TFRC/GPNMB/GPR143/CLTC
MF	GO:0070034	telomerase RNA binding	20	0.762631	1.62258	0.0179641	0.245999	0.226249	101	tags=10%, list=1%, signal=10%	TEP1/XRN1
BP	GO:0036500	ATF6-mediated unfolded protein response	10	0.844299	1.52827	0.0180148	0.246236	0.226467	442	tags=30%, list=3%, signal=29%	HSP90B1/CALR/HSPA5
BP	GO:0000963	mitochondrial RNA processing	16	0.791232	1.58676	0.0181816	0.247599	0.22772	393	tags=19%, list=3%, signal=18%	TRMT10A/TBRG4/MTO1
BP	GO:0042026	protein refolding	16	0.791506	1.58731	0.0181816	0.247599	0.22772	965	tags=38%, list=8%, signal=35%	HSPD1/HSP90AA1/HSPA9/HSPA5/HSPA13/BAG5
MF	GO:0090079	translation regulator activity, nucleic acid binding	86	0.527325	1.47774	0.0182601	0.247814	0.227918	2335	tags=37%, list=18%, signal=31%	GCN1/EIF6/EIF1AD/EIF2B1/EIF4H/EIF4G1/EIF5B/GFM1/TUFM/LARP1/C1QBP/EIF3C/EEF1G/MTIF2/DENR/CPEB2/EIF2A/SHMT1/GSPT1/EIF3E/ABCF1/EIF4G3/EIF4A1/EIF4B/MTRF1/DHX29/EIF5/EIF3M/EIF3L/ETF1/EIF2S2/EIF4E
CC	GO:0031261	DNA replication preinitiation complex	12	0.828057	1.54459	0.0182662	0.247814	0.227918	466	tags=8%, list=4%, signal=8%	ORC3
BP	GO:0002886	regulation of myeloid leukocyte mediated immunity	41	-0.718146	-1.58029	0.0182981	0.247814	0.227918	2625	tags=44%, list=21%, signal=35%	FES/DDX21/PRAM1/C3/TICAM1/HMOX1/RAC2/DNASE1L3/BTK/CD84/GATA2/MAVS/ITGAM/LYN/PDPK1/PLA2G3/BLK/FOXF1
BP	GO:0038084	vascular endothelial growth factor signaling pathway	36	-0.723418	-1.55416	0.0186131	0.250568	0.230451	1467	tags=25%, list=12%, signal=22%	DAB2IP/DLL1/CADM4/VEGFC/XDH/PGF/FLT3/NRP1/DCN
BP	GO:0050817	coagulation	254	-0.525923	-1.42001	0.0186307	0.250568	0.230451	2123	tags=29%, list=17%, signal=25%	PIK3CG/SERPINE1/PRKCD/HBG2/ADORA2A/F2R/APOH/GNA13/TYRO3/ADAMTS18/GNAS/GP5/MAFG/CD40/SRC/ENTPD1/AK3/GATA4/ACTB/ANXA5/MERTK/PRKAR2B/FBLN1/GNG2/CBX5/PLA2G4A/FAP/F2/PROZ/FN1/SCUBE1/F11R/RAB27A/P2RY12/PRCP/SLC4A1/HMG20B/GP9/DOCK11/BLOC1S3/GATA2/GP1BB/GP1BA/PROC/F9/PLAU/CD9/PIK3R1/GATA3/ARRB1/SERPINA10/PIK3R6/TEC/TEC/LYN/SERPINA1/PDPK1/RBSN/BLK/A2M/APOE/PDGFA/SERPIND1/COL1A1/SERPING1/PLG/COL1A2/ST3GAL4…
BP	GO:2001235	positive regulation of apoptotic signaling pathway	90	-0.615513	-1.478	0.0186458	0.250568	0.230451	1669	tags=24%, list=13%, signal=21%	DEDD2/SIRT1/RBCK1/DAB2IP/SOD1/BAX/PARK7/NFATC4/AGT/SLC9A3R1/CTSC/TNFSF10/BOK/PPP1CA/BMPR1B/INHBB/TRAF2/BCL10/ING5/CAV1/MSX1/TNFSF12
MF	GO:0019825	oxygen binding	22	-0.791255	-1.56334	0.01867	0.250568	0.230451	1419	tags=36%, list=11%, signal=32%	PARK7/CYP19A1/NOX4/CYP4B1/MB/CYP1A1/CYP3A4/HBG1
BP	GO:0001953	negative regulation of cell-matrix adhesion	31	-0.755115	-1.57334	0.0186712	0.250568	0.230451	820	tags=16%, list=6%, signal=15%	PIK3R1/BCL6/MMP14/ACER2/POSTN
CC	GO:0030686	90S preribosome	27	0.707009	1.61104	0.0187533	0.251144	0.230981	1972	tags=37%, list=16%, signal=31%	WDR36/WDR3/HEATR1/NOP14/RSL1D1/BMS1/UTP20/RRP36/UTP18/KRI1
BP	GO:0009306	protein secretion	284	0.409941	1.31125	0.0188162	0.251144	0.230981	785	tags=11%, list=6%, signal=10%	RFX6/INS/NAGPA/GCG/P3H1/MIDN/SEL1L/IL1B/CFTR/CPLX3/VIP/PREB/PDIA4/GJA1/TMED10/PDX1/ABCC8/OPRM1/CANX/COPG2/STXBP5L/ADCY5/PTPN23/SLC8B1/RFX3/DNAJC1/PORCN/PTPRN2/RAB11FIP2/HNF1B
BP	GO:0035592	establishment of protein localization to extracellular region	284	0.409941	1.31125	0.0188162	0.251144	0.230981	785	tags=11%, list=6%, signal=10%	RFX6/INS/NAGPA/GCG/P3H1/MIDN/SEL1L/IL1B/CFTR/CPLX3/VIP/PREB/PDIA4/GJA1/TMED10/PDX1/ABCC8/OPRM1/CANX/COPG2/STXBP5L/ADCY5/PTPN23/SLC8B1/RFX3/DNAJC1/PORCN/PTPRN2/RAB11FIP2/HNF1B
BP	GO:0043248	proteasome assembly	12	0.826918	1.54247	0.018962	0.251774	0.231561	1592	tags=58%, list=13%, signal=51%	PSMD13/PSMD4/PSMD11/ADRM1/PSMG4/PSMG2/PSMD5
MF	GO:0140161	monocarboxylate:sodium symporter activity	12	-0.840058	-1.50302	0.0189625	0.251774	0.231561	126	tags=42%, list=1%, signal=41%	SLC6A1/SLC6A13/SLC1A2/SLC10A1/SLC10A2
MF	GO:0005506	iron ion binding	101	-0.609519	-1.49544	0.0189658	0.251774	0.231561	1132	tags=28%, list=9%, signal=25%	CYP27B1/CYP19A1/CYP4F22/CYP2U1/ACP5/CYP4B1/P3H2/NFU1/ALOX15B/XDH/EGLN1/PHF8/CYP51A1/CYP46A1/HAAO/CYP27A1/LTF/CYP4V2/CDO1/MSMO1/TBXAS1/CYP2R1/SC5D/CYP2J2/CYP1A1/CYP3A4/EGLN3/SCD5
MF	GO:0005261	cation channel activity	234	0.422517	1.32088	0.0190544	0.252132	0.23189	1359	tags=15%, list=11%, signal=13%	KCNG3/GRIK1/KCNK16/SCN4A/PIEZO2/ANXA2/KCNJ15/P2RX2/ABCC8/OPRM1/SCN3B/TRPC7/GPM6A/KCND1/KCNJ12/TRPM1/TMEM63C/SEC61A1/SLC4A11/KCNJ1/CNGB1/TRPM7/TMCO1/KCNJ5/CHRNB4/KCNIP3/ASIC1/KCNQ5/ASIC4/CHRND/KCNQ2/RYR2/SLC24A4/FAM155A
BP	GO:0044282	small molecule catabolic process	349	-0.488489	-1.35026	0.0190832	0.252132	0.23189	1713	tags=21%, list=13%, signal=18%	CRYM/CDA/PNKD/ENTPD1/IDO2/LPIN1/ASPA/PAH/DDO/SLC27A2/RENBP/TPI1/PFKFB2/PARK7/GPT/TAT/DDAH2/TKFC/ALDH4A1/PCBD1/PFKM/MTMR7/GAD1/ACOT8/BCKDK/CRABP1/GADL1/GOT2/CYP27B1/BPNT1/ALDOA/GCSH/PDXP/HSD17B4/ADH5/GAPDH/XDH/NT5M/HAL/ASRGL1/CYP46A1/HAAO/CYP27A1/GALT/ENTPD3/AMDHD1/GSTZ1/APOE/ACMSD/EHHADH/NPL/SORD/PEX2/ALDH8A1/PRODH/UROC1/CDO1/PON3/NT5C3A/IL4I1/ENO3/KHK/PGM1/ABCB11/PLA2G15/AMDHD2/GLB1/CYP1A1/QDPR/…
MF	GO:0016831	carboxy-lyase activity	31	-0.752391	-1.56767	0.0191469	0.252132	0.23189	2	tags=16%, list=0%, signal=16%	GAD1/GADL1/ME2/ACMSD/CSAD
BP	GO:0050920	regulation of chemotaxis	168	-0.5734	-1.49689	0.0191473	0.252132	0.23189	1434	tags=20%, list=11%, signal=18%	SMAD3/CSF1R/AIF1/TIRAP/SEMA7A/P2RY12/SEMA3A/PTN/PLXNA4/SEMA3D/VEGFC/AKIRIN1/FPR2/CXCL12/SWAP70/CXCL10/CMKLR1/DSCAM/SEMA3C/LYN/PGF/ANGPT2/MST1/LGMN/NTF3/NRP1/ITGA2/S100A14/WNT5A/CXCL14/CSF1/CCR6/LBP
BP	GO:0003306	Wnt signaling pathway involved in heart development	10	-0.851481	-1.48621	0.0191635	0.252132	0.23189	365	tags=30%, list=3%, signal=29%	WNT3A/ALPK2/WNT5A
BP	GO:0031349	positive regulation of defense response	237	0.42333	1.32322	0.0192385	0.252668	0.232382	1456	tags=22%, list=11%, signal=20%	PSMC4/PSMD14/PSMD2/RELB/IL1B/PSMC3/PSMD6/PSMD1/PSMC5/PSMC2/HSP90AA1/PSMC1/GJA1/PSMA3/PSMD7/PSMD13/PSMD8/PSMD4/PSMD3/CLNK/NFKB1/PSMB5/PSMA5/MED1/IKBKE/PSMC6/PSMB4/PSMD12/PSMB2/LRRK2/PSMD11/DHX9/PSMB1/PSMA2/ABCC1/TAB1/PSMA1/NLRP12/PSMA6/PDE2A/IKBKB/NOD1/CCR7/PSMA4/CDK19/PSMB3/HAVCR2/PSMB7/MUC6/CUL1/CLOCK/RIOK3/IRF7
MF	GO:0016614	oxidoreductase activity, acting on CH-OH group of donors	94	-0.596958	-1.44158	0.0195472	0.256267	0.235692	975	tags=19%, list=8%, signal=18%	CHDH/CBR4/FASN/HSD17B4/ADH5/ME2/KCNAB1/RDH16/HMGCR/RDH11/EHHADH/SORD/GPD1/HSD17B7/DHRS3/HSD3B1/RDH8/HSD11B2
BP	GO:0006997	nucleus organization	95	0.507197	1.44946	0.0199212	0.260606	0.239683	1515	tags=20%, list=12%, signal=18%	WDR73/AFF2/NUP205/NUP35/CHD5/REEP3/HABP4/FAM118B/NSFL1C/NUP107/TPR/DCTN1/NUP98/PPP2R1A/CHMP2B/NUP155/NUP153/PSME4/AHCTF1
BP	GO:0002183	cytoplasmic translational initiation	32	0.670609	1.56893	0.0199488	0.260606	0.239683	2284	tags=41%, list=18%, signal=33%	EIF4H/EIF4G1/RBM4/EIF3C/DENR/EIF3E/EIF4A1/EIF4B/DHX29/EIF5/EIF3M/EIF3L/EIF2S2
MF	GO:0008395	steroid hydroxylase activity	19	-0.812612	-1.57482	0.0200389	0.26132	0.24034	1124	tags=47%, list=9%, signal=43%	CYP2A13/CYP19A1/CYP2U1/CYP46A1/CYP27A1/CYP2R1/CYP2J2/CYP1A1/CYP3A4
BP	GO:0031638	zymogen activation	41	-0.713807	-1.57074	0.0201394	0.262168	0.24112	907	tags=27%, list=7%, signal=25%	CTSH/GGT1/F9/PLAU/HPN/MMP14/CIDEB/CUZD1/LGMN/PERP/F11
BP	GO:0010561	negative regulation of glycoprotein biosynthetic process	10	-0.848222	-1.48052	0.0202208	0.262317	0.241257	1622	tags=70%, list=13%, signal=61%	ITM2B/HBEGF/ACOT8/TMEM59/ITM2A/BACE2/ACER2
BP	GO:0070167	regulation of biomineral tissue development	69	-0.659697	-1.53516	0.0202383	0.262317	0.241257	1946	tags=28%, list=15%, signal=23%	BMP7/GPM6B/PHOSPHO1/MATN1/PTK2B/SMAD3/CYP27B1/WNT10B/SLC8A1/ADGRV1/PTN/BMPR1B/ANKH/TMEM119/LTF/SOX9/BGLAP/AHSG/ECM1
CC	GO:0005743	mitochondrial inner membrane	372	0.382241	1.23824	0.0202575	0.262317	0.241257	1772	tags=19%, list=14%, signal=17%	OTC/HSPD1/ADCK1/PMPCB/FOXRED1/MRPL9/HSPA9/HADHA/DAP3/LGALS3/MRPS22/DNAJC11/TAMM41/MRPL4/OPA1/LRRK2/SLC8B1/COA3/COX18/SPG7/UQCRC1/MRPS18C/IMMT/L2HGDH/CYCS/SLC25A16/TRAP1/MRPL24/TMEM177/PDE2A/MRPS12/MRPL57/MRPL41/GHITM/SLC25A24/MRPL46/MRPL22/MRPS27/MRPL53/HADHB/CYC1/NDUFV2/TIMM8B/MRPL40/PHB2/ALDH18A1/ABCB8/AURKAIP1/SLC25A29/MRPL32/MRPS18B/MRPS26/MRPS21/MRPL37/COX11/NDUFV1/MRPL54/MRPS25/SAMM50/MRPL1…
BP	GO:0009185	ribonucleoside diphosphate metabolic process	120	0.497972	1.4452	0.0203356	0.262868	0.241763	982	tags=19%, list=8%, signal=18%	INS/JMJD8/NUP205/CMPK1/NUP35/EIF6/ENTPD4/AK9/ARNT/PRKAG2/SEC13/OGDH/NUP210/NUP188/TJP2/NUP107/TPR/ALDOC/NUDT5/GALK1/NUP98/CASK/ENTPD7
BP	GO:0001501	skeletal system development	393	-0.489643	-1.36318	0.0204542	0.263938	0.242748	1809	tags=23%, list=14%, signal=20%	HOXA9/GNAS/PHOSPHO1/PTGER4/NPR2/MATN1/SRC/THPO/HOXD3/RGN/CDH11/EBP/SOX11/FREM1/PTHLH/SMAD5/HOXA2/SMAD1/HEXB/HOXD12/SMAD3/NODAL/HAND2/RAB23/TCF15/RAB33B/BMP5/HOXB2/EN1/SMPD3/PTH1R/MSX2/RUNX3/GPR68/NCAN/WNT10B/LOX/RBP4/EIF2AK3/TRAPPC2/TGFBR2/PCGF2/IGF2/PHEX/PRRX1/MAPK14/FGF8/WNT5B/NKX3-2/BMPR1B/ANKH/LRRC17/VCAN/WASF2/CMKLR1/TMEM119/SFRP2/LTF/RASSF2/NPR3/TGFBI/MMP14/GDF10/PRELP/SNX19/HOXA13/CSRNP1/C…
BP	GO:0006828	manganese ion transport	11	0.830152	1.52746	0.0205245	0.264104	0.2429	1472	tags=36%, list=12%, signal=32%	SLC39A14/TRPC7/TMEM165/ATP13A1
MF	GO:0008175	tRNA methyltransferase activity	32	0.667497	1.56165	0.0205463	0.264104	0.2429	1568	tags=22%, list=12%, signal=19%	TRMT10A/METTL2A/NSUN2/NSUN6/TRMT1L/TRMT61A/METTL6
MF	GO:0005385	zinc ion transmembrane transporter activity	16	0.782382	1.56901	0.0206058	0.264104	0.2429	211	tags=25%, list=2%, signal=25%	SLC39A14/SLC30A5/SLC39A10/SLC39A7
BP	GO:0002764	immune response-regulating signaling pathway	285	0.398375	1.27342	0.0206102	0.264104	0.2429	1104	tags=15%, list=9%, signal=14%	PSMC4/NFKBID/PSMD14/PSMD2/RELB/PSMC3/PSMD6/PSMD1/PSMC5/PSMC2/SLC39A10/HSP90AA1/PSMC1/PSMA3/PSMD7/PSMD13/PSMD8/PSMD4/PSMD3/NFKB1/PSMB5/LGALS3/PSMA5/PSMC6/PSMB4/PSMD12/PSMB2/ITK/EIF2B1/PSMD11/PRKCQ/PSMB1/PSMA2/ARPC5/TAB1/PSMA1/PSMA6/IKBKB/CR1/NR4A3/PLPP4/CCR7/PSMA4
BP	GO:0043583	ear development	173	-0.556029	-1.45682	0.0207444	0.265131	0.243845	1940	tags=28%, list=15%, signal=24%	SLC44A4/TBX1/GABRA5/MCOLN3/COL2A1/MAFB/USH1C/IFT88/AHI1/ADAM10/WDPCP/SOBP/HOXA2/SOD1/TCF15/MYCL/DLL1/PLPPR4/SLC9A3R1/USH2A/ADGRV1/ATP8B1/HESX1/GATA2/TRIOBP/GATA3/PRRX1/LGR5/FGF8/FZD2/TSHZ1/NKX3-2/SPARC/FOXI1/OTOL1/HPN/LIN7A/MYO7A/EPHA4/DDR1/HOXA13/HES1/COL11A1/LRTOMT/SOX9/WNT5A/CXCL14/CTHRC1/MSX1
BP	GO:0050818	regulation of coagulation	60	-0.675222	-1.54119	0.020804	0.265131	0.243845	2363	tags=37%, list=19%, signal=30%	CPB2/SERPINF2/KNG1/SERPINE1/PRKCD/F2R/APOH/ADAMTS18/ANXA5/FAP/F2/GP1BA/PROC/PLAU/CD9/APOE/PDGFA/SERPING1/PLG/ST3GAL4/CAV1/F11
MF	GO:0001091	RNA polymerase II general transcription initiation factor binding	17	0.742966	1.50882	0.0208199	0.265131	0.243845	2132	tags=41%, list=17%, signal=34%	ESR1/DRAP1/TAF7/FBL/HNRNPU/RUVBL2/ERCC4
BP	GO:0001523	retinoid metabolic process	70	-0.660897	-1.5406	0.0208414	0.265131	0.243845	1163	tags=27%, list=9%, signal=25%	CRABP1/SCPEP1/RBP4/APOA1/APOB/ADH5/LRAT/RDH16/APOE/RDH11/APOC2/CYP4V2/ALDH8A1/DGAT2/DHRS3/OPN1SW/RDH8/CYP1A1/CYP3A4
CC	GO:0030687	preribosome, large subunit precursor	22	0.725007	1.56954	0.020915	0.265131	0.243845	2836	tags=50%, list=22%, signal=39%	MDN1/EIF6/NIP7/RRS1/PPAN/WDR74/ZNF622/FTSJ3/RRP1/WDR12/MRTO4
CC	GO:0018995	host cellular component	54	0.603068	1.56682	0.0210408	0.265131	0.243845	2630	tags=37%, list=21%, signal=30%	NUP205/NUP35/PI4KA/SEC13/NUP210/NUP188/NUP107/TPR/NUP98/NUP155/NUP153/KPNB1/DYNLT1/NUP160/NUP85/NUP88/NUP133/RAN/NUP93/NUP54
CC	GO:0043657	host cell	54	0.603068	1.56682	0.0210408	0.265131	0.243845	2630	tags=37%, list=21%, signal=30%	NUP205/NUP35/PI4KA/SEC13/NUP210/NUP188/NUP107/TPR/NUP98/NUP155/NUP153/KPNB1/DYNLT1/NUP160/NUP85/NUP88/NUP133/RAN/NUP93/NUP54
BP	GO:0015868	purine ribonucleotide transport	15	0.791919	1.55688	0.0210495	0.265131	0.243845	1078	tags=40%, list=8%, signal=37%	GJA1/SLC33A1/ABCC4/ABCD1/CR1/SLC25A24
BP	GO:0034116	positive regulation of heterotypic cell-cell adhesion	12	0.821202	1.53181	0.0210495	0.265131	0.243845	97	tags=17%, list=1%, signal=17%	IL10/IL1B
BP	GO:0051503	adenine nucleotide transport	15	0.791919	1.55688	0.0210495	0.265131	0.243845	1078	tags=40%, list=8%, signal=37%	GJA1/SLC33A1/ABCC4/ABCD1/CR1/SLC25A24
BP	GO:0042177	negative regulation of protein catabolic process	100	0.51144	1.4499	0.0211069	0.2654	0.244093	1171	tags=18%, list=9%, signal=16%	INS/IL10/RIC1/SGTA/ANXA2/ADGRB1/RPL5/USP7/KLHL40/ALAD/USP14/FURIN/CDK5RAP3/BAG5/N4BP1/MDM4/SF3B3/FMN2
MF	GO:1990381	ubiquitin-specific protease binding	17	0.742481	1.50784	0.0211884	0.265972	0.244618	1401	tags=41%, list=11%, signal=37%	DERL2/DERL1/SYVN1/VCP/CLTC/RAD23A/PDZD3
MF	GO:0020037	heme binding	88	-0.624843	-1.49526	0.0212611	0.266192	0.244821	1238	tags=27%, list=10%, signal=25%	HEBP1/CYP27B1/CYP19A1/CYP4F22/CYP2U1/PGRMC1/CYBA/NOX4/CYP4B1/HEBP2/SLC48A1/CYP51A1/CYP46A1/CYP27A1/CYP4V2/TBXAS1/CYP2R1/AMBP/MB/CYP2J2/CYP1A1/CYP3A4/HBG1/FLVCR2
BP	GO:1904350	regulation of protein catabolic process in the vacuole	10	-0.845086	-1.47505	0.0212781	0.266192	0.244821	585	tags=40%, list=5%, signal=38%	LAPTM4B/MFSD8/RNF128/MGAT3
BP	GO:0030510	regulation of BMP signaling pathway	72	-0.645658	-1.51168	0.0213884	0.266679	0.245269	915	tags=29%, list=7%, signal=27%	TOB1/FBXL15/SMAD7/NOG/PPARG/ABL1/GATA4/SOX11/SFRP5/SMAD6/FSTL1/CRB2/VWC2L/SFRP2/HOXA13/HES1/WNT5A/SOSTDC1/HTRA3/MSX1/HTRA1
BP	GO:0097529	myeloid leukocyte migration	144	-0.578228	-1.47628	0.0213892	0.266679	0.245269	1363	tags=33%, list=11%, signal=29%	RHOG/DAPK2/PREX1/IL1R1/PLA2G1B/TNFSF11/IL17RC/MOSPD2/PIK3CG/CCL20/SERPINE1/RAC2/ANXA1/PTGER4/C5AR1/PTK2B/CSF3R/CSF1R/AIF1/TIRAP/CXADR/PLCB1/P2RY12/DPEP1/TRIM55/CKLF/VEGFC/AKIRIN1/FPR2/CXCL12/CD200/SWAP70/CXCL10/CMKLR1/CD200R1/LYN/SIRPA/PGF/MMP14/MST1/LGMN/S100A14/SFTPD/MSMP/CCL25/CSF1/LBP
BP	GO:0030837	negative regulation of actin filament polymerization	41	-0.710845	-1.56422	0.0215204	0.267644	0.246157	1073	tags=24%, list=8%, signal=22%	TMOD4/TMOD3/HIP1R/TRIOBP/SPTBN5/GSN/EPS8/TMOD1/AVIL/TWF2
CC	GO:0043296	apical junction complex	116	-0.600262	-1.48601	0.0215392	0.267644	0.246157	1294	tags=18%, list=10%, signal=16%	CXADR/ECT2/MICALL2/EPPK1/F11R/CLDN10/FRMPD2/LIN7A/SAPCD2/CLDN15/CYTH1/CLDN11/PARD6A/OCLN/CLDN34/POF1B/PLXDC1/PRKCZ/CLDN3/MXRA8/AOC1
BP	GO:0032891	negative regulation of organic acid transport	16	0.779981	1.56419	0.0216447	0.26835	0.246806	875	tags=25%, list=7%, signal=23%	RGS4/PLA2R1/THBS1/GRM7
MF	GO:0048027	mRNA 5'-UTR binding	22	0.721681	1.56233	0.0216687	0.26835	0.246806	1805	tags=50%, list=14%, signal=43%	IGF2BP1/RPL5/LARP1/NCL/RSL1D1/SHMT1/IGF2BP2/MYH10/CCT5/RPS13/IGF2BP3
BP	GO:0050821	protein stabilization	156	0.451901	1.36119	0.0217691	0.269142	0.247534	1762	tags=24%, list=14%, signal=21%	HSPD1/P3H1/ZSWIM7/SEL1L/SEC16A/SYVN1/HSP90AA1/TSC1/CALR/CCNH/RPL5/STX12/CCT3/CCT6A/FBXW7/USP7/CCT4/PTGES3/CDC37/BAG5/CCT8/WIZ/MDM4/FKBPL/PHB2/RAB21/NCLN/NAPG/FLNA/STK4/COG7/CCT7/HCFC1/MTMR9/CCT5/TELO2/GNAQ
MF	GO:0008106	alcohol dehydrogenase (NADP+) activity	12	-0.830142	-1.48528	0.0218395	0.269561	0.24792	464	tags=67%, list=4%, signal=64%	AKR1A1/DHRS13/RDH12/RDH14/AKR1D1/RDH11/DHRS3/RDH8
BP	GO:0022617	extracellular matrix disassembly	56	-0.703471	-1.59096	0.0218798	0.269607	0.247962	2073	tags=38%, list=16%, signal=32%	CTSK/LCP1/CMA1/CTSG/ADAM10/CST3/FAP/CTSS/SCUBE1/SCUBE3/FSCN1/ETS1/HPN/DDR1/MMP14/A2M/PLG/CTSV/MMP11/MMP2/HTRA1
BP	GO:0002181	cytoplasmic translation	88	0.510466	1.43911	0.0219924	0.269633	0.247986	3849	tags=59%, list=30%, signal=41%	EIF4H/EIF4G1/DHX9/RWDD1/RBM4/EIF3C/DENR/CPEB2/GSPT1/EIF3E/DPH3/EIF4A1/EIF4B/DHX29/EIF5/DPH6/ZNF385A/EIF3M/EIF3L/RPS21/ETF1/EIF2S2/DPH7/RPL22L1/DRG2/DPH5/DHX36/RPS23/RPL11/RPSA/RPS26/RPS28/EIF2D/EIF2S3/EIF3A/RPL15/RPL36/RPL13A/RPL24/METTL3/RPL35A/RPL31/EIF3B/RPL8/RPS29/RPL29/RPLP0/RPL26/EIF3K/RPL36A/RPLP1/EIF2B3
BP	GO:0046173	polyol biosynthetic process	53	-0.699684	-1.57349	0.0220078	0.269633	0.247986	1768	tags=32%, list=14%, signal=28%	PCK1/PTK2B/IPMK/PTH1R/PCBD1/ITPKB/CYP27B1/PDXP/CYP27A1/GCH1/P2RY6/ASAH2/ACER2/IP6K2/CYP2R1/QDPR/CYP3A4
BP	GO:0055093	response to hyperoxia	19	-0.806252	-1.56249	0.0220304	0.269633	0.247986	374	tags=32%, list=3%, signal=31%	ATG7/PPARG/COL1A1/CAV1/EPO/CYP1A1
BP	GO:1903573	negative regulation of response to endoplasmic reticulum stress	35	0.656507	1.54666	0.0220967	0.269633	0.247986	834	tags=29%, list=7%, signal=27%	SGTA/SYVN1/UFL1/PDX1/HSPA5/OPA1/LRRK2/DNAJC3/USP14/TMED2
BP	GO:0042481	regulation of odontogenesis	12	-0.828958	-1.48316	0.0221011	0.269633	0.247986	769	tags=25%, list=6%, signal=24%	FGF8/MSX1/CSF1
BP	GO:0042737	drug catabolic process	12	-0.829304	-1.48378	0.0221011	0.269633	0.247986	1026	tags=50%, list=8%, signal=46%	CYP2A13/CYP2U1/NR1I2/CYP2R1/CYP2J2/CYP3A4
CC	GO:0031463	Cul3-RING ubiquitin ligase complex	32	0.663977	1.55342	0.0221421	0.269687	0.248036	1468	tags=19%, list=12%, signal=17%	KLHL8/PDCD6/KLHL40/GAN/RBX1/PEF1
BP	GO:0050995	negative regulation of lipid catabolic process	17	0.739648	1.50208	0.0222938	0.271089	0.249324	97	tags=12%, list=1%, signal=12%	INS/IL1B
BP	GO:0051216	cartilage development	150	-0.575844	-1.48209	0.0223878	0.271356	0.24957	1546	tags=21%, list=12%, signal=19%	PTHLH/SMAD5/SMAD1/SMAD3/HAND2/BMP5/SMPD3/PTH1R/RUNX3/WNT10B/EIF2AK3/TGFBR2/PRRX1/MAPK14/WNT5B/NKX3-2/BMPR1B/SFRP2/TGFBI/SNX19/COL1A1/SERPINH1/COL11A1/CHRDL2/ADAMTS7/SOX9/WNT5A/MSX1/ECM1/LUM/MATN3/OTOR
BP	GO:0030207	chondroitin sulfate catabolic process	13	-0.856541	-1.54795	0.0223893	0.271356	0.24957	1513	tags=54%, list=12%, signal=47%	HEXB/ARSB/NCAN/VCAN/IDS/CSPG5/DCN
BP	GO:1902105	regulation of leukocyte differentiation	190	-0.526175	-1.3883	0.0224544	0.271699	0.249886	1550	tags=23%, list=12%, signal=20%	CDK6/HLX/SOD1/JUN/ZFP36L2/ITPKB/BTK/RUNX3/C1QC/MALT1/GPR68/GPR137B/CRTAM/GATA2/ATP11C/OCSTAMP/ZC3H12A/TGFBR2/PIK3R1/GATA3/TMEM176B/NRARP/PIK3R6/LRRC17/LYN/BCL6/CA2/DUSP10/SLC46A2/LTF/TESPA1/PLA2G3/RASSF2/NDFIP1/TLR3/MMP14/KITLG/BGLAP/LOXL3/SOX4/RC3H2/CSF1/PRKCZ
BP	GO:0043304	regulation of mast cell degranulation	23	-0.777767	-1.5498	0.0225282	0.272145	0.250296	967	tags=39%, list=8%, signal=36%	HMOX1/RAC2/CD84/GATA2/LYN/PDPK1/PLA2G3/BLK/FOXF1
BP	GO:0006636	unsaturated fatty acid biosynthetic process	35	-0.728082	-1.55397	0.0228074	0.274691	0.252638	758	tags=14%, list=6%, signal=13%	ALOX15B/PLA2G3/TBXAS1/FADS2/SCD5
MF	GO:0010857	calcium-dependent protein kinase activity	22	-0.778731	-1.53859	0.0228738	0.274691	0.252638	175	tags=18%, list=1%, signal=18%	PKN1/MKNK2/MAPKAPK3/PRKCZ
BP	GO:0050651	dermatan sulfate proteoglycan biosynthetic process	15	-0.845914	-1.552	0.0228857	0.274691	0.252638	1113	tags=27%, list=9%, signal=24%	NCAN/VCAN/CSPG5/DCN
BP	GO:0071577	zinc ion transmembrane transport	18	0.750442	1.53297	0.0228878	0.274691	0.252638	211	tags=22%, list=2%, signal=22%	SLC39A14/SLC30A5/SLC39A10/SLC39A7
BP	GO:0050878	regulation of body fluid levels	370	-0.476713	-1.32204	0.0230625	0.276339	0.254153	1842	tags=23%, list=14%, signal=21%	GPAT4/ADAMTS18/GNAS/GP5/MAFG/CD40/SRC/ADORA1/ENTPD1/AK3/GATA4/ACTB/GNAI2/ANXA5/MERTK/PRKAR2B/FBLN1/GNG2/CBX5/PLA2G4A/APLNR/FAP/KALRN/F2/PROZ/SLC29A1/FN1/SCUBE1/ADCY1/GOT2/ADCY8/F11R/RAB27A/P2RY12/PRCP/SLC4A1/HMG20B/GP9/EMP2/DOCK11/BLOC1S3/GATA2/GP1BB/GP1BA/PROC/F9/GJA5/NPR1/PLAU/CD9/PIK3R1/GATA3/ARRB1/XDH/AVPR2/SERPINA10/PIK3R6/PRLR/TEC/TEC/LYN/SERPINA1/PDPK1/BTC/RBSN/APRT/BLK/NPR3/DDR1/A2M/APOE/…
BP	GO:1901678	iron coordination entity transport	10	-0.841036	-1.46798	0.0231283	0.276678	0.254465	652	tags=30%, list=5%, signal=28%	SLC48A1/LTF/FLVCR2
MF	GO:0051119	sugar transmembrane transporter activity	16	-0.843024	-1.57066	0.0232285	0.276948	0.254713	586	tags=19%, list=5%, signal=18%	SLC2A2/SLC5A2/SLC5A9
BP	GO:2000404	regulation of T cell migration	28	-0.783872	-1.61389	0.0232317	0.276948	0.254713	783	tags=25%, list=6%, signal=24%	CXCL12/CD200/CXCL10/CD200R1/WNT5A/ECM1/CCR6
MF	GO:0008198	ferrous iron binding	19	-0.800531	-1.5514	0.023275	0.276948	0.254713	873	tags=26%, list=7%, signal=25%	ACP5/EGLN1/HAAO/CDO1/EGLN3
MF	GO:0004181	metallocarboxypeptidase activity	20	-0.796265	-1.55859	0.0233918	0.276948	0.254713	403	tags=25%, list=3%, signal=24%	CPA2/CPN1/CPXM1/CPZ/CPA6
BP	GO:0009313	oligosaccharide catabolic process	10	-0.840702	-1.4674	0.0233927	0.276948	0.254713	1513	tags=40%, list=12%, signal=35%	HEXB/GM2A/CTBS/MAN2B1
BP	GO:0009135	purine nucleoside diphosphate metabolic process	117	0.474684	1.37513	0.0234336	0.276948	0.254713	945	tags=17%, list=7%, signal=16%	INS/JMJD8/NUP205/NUP35/EIF6/ENTPD4/AK9/ARNT/PRKAG2/SEC13/OGDH/NUP210/NUP188/TJP2/NUP107/TPR/ALDOC/GALK1/NUP98/CASK
BP	GO:0009179	purine ribonucleoside diphosphate metabolic process	117	0.474684	1.37513	0.0234336	0.276948	0.254713	945	tags=17%, list=7%, signal=16%	INS/JMJD8/NUP205/NUP35/EIF6/ENTPD4/AK9/ARNT/PRKAG2/SEC13/OGDH/NUP210/NUP188/TJP2/NUP107/TPR/ALDOC/GALK1/NUP98/CASK
BP	GO:0030324	lung development	146	-0.558912	-1.43124	0.0234658	0.276948	0.254713	1617	tags=29%, list=13%, signal=25%	DAG1/YAP1/EIF4EBP1/NOG/SREBF1/TBX5/KRAS/FGF1/WNT2B/JMJD6/ADAMTS2/SOX11/GLI1/NODAL/SMPD3/SPDEF/EPAS1/CTSH/LOX/RBP4/PTN/CELSR1/TGFBR2/PHEX/FGF8/PPP1CA/SPARC/MMP14/PDGFA/PGR/LIPA/ERRFI1/HES1/FOXF1/CRISPLD2/ABCA12/SOX9/LOXL3/SFTPD/WNT5A/RC3H2/MAP2K1
BP	GO:0001541	ovarian follicle development	48	-0.678959	-1.52325	0.0234989	0.276948	0.254713	1779	tags=27%, list=14%, signal=23%	ADCYAP1/SRC/SOD1/BAX/GNRH1/ARRB1/BMPR1B/INHBB/GAS2/MMP14/KITLG/DMC1/AMH
BP	GO:0007218	neuropeptide signaling pathway	69	0.536659	1.44663	0.023587	0.276948	0.254713	1703	tags=23%, list=13%, signal=20%	SCG5/NMB/CALCA/OPRM1/NPPA/NMUR2/NPB/GPR143/CRCP/LTB4R/NMUR1/ECEL1/NPY2R/TENM1/GAL/GALR1
MF	GO:0016863	intramolecular oxidoreductase activity, transposing C=C bonds	11	-0.848084	-1.49382	0.0236011	0.276948	0.254713	444	tags=36%, list=3%, signal=35%	EBP/EHHADH/IDI1/HSD3B1
BP	GO:0044406	adhesion of symbiont to host	11	-0.847684	-1.49311	0.0236011	0.276948	0.254713	711	tags=64%, list=6%, signal=60%	GAS6/LRRC15/CLEC4M/INHBB/LTF/CD209/SFTPD
BP	GO:0006704	glucocorticoid biosynthetic process	13	-0.852431	-1.54052	0.0236835	0.276961	0.254725	120	tags=23%, list=1%, signal=23%	BMP5/HSD3B1/HSD11B2
BP	GO:0090141	positive regulation of mitochondrial fission	13	-0.852936	-1.54143	0.0236835	0.276961	0.254725	34	tags=15%, list=0%, signal=15%	VPS35/DCN
BP	GO:0014909	smooth muscle cell migration	58	-0.678711	-1.54129	0.0237149	0.276961	0.254725	857	tags=16%, list=7%, signal=15%	NOX4/PLAU/DDR1/PDGFA/NDRG4/ACE/NRP1/ITGA2/POSTN
BP	GO:0036296	response to increased oxygen levels	26	-0.773694	-1.58286	0.0237568	0.277013	0.254773	374	tags=15%, list=3%, signal=15%	COL1A1/CAV1/EPO/CYP1A1
CC	GO:0071782	endoplasmic reticulum tubular network	19	0.728841	1.524	0.0240641	0.278397	0.256046	2230	tags=37%, list=18%, signal=30%	REEP2/REEP3/ASPH/RAB18/KPNB1/PARP16/RTN4
BP	GO:0090670	RNA localization to Cajal body	19	0.729506	1.5254	0.0240641	0.278397	0.256046	1721	tags=42%, list=14%, signal=36%	CCT3/CCT6A/CCT4/CCT8/NHP2/CCT7/RUVBL2/CCT5
BP	GO:0090671	telomerase RNA localization to Cajal body	19	0.729506	1.5254	0.0240641	0.278397	0.256046	1721	tags=42%, list=14%, signal=36%	CCT3/CCT6A/CCT4/CCT8/NHP2/CCT7/RUVBL2/CCT5
BP	GO:0090672	telomerase RNA localization	19	0.729506	1.5254	0.0240641	0.278397	0.256046	1721	tags=42%, list=14%, signal=36%	CCT3/CCT6A/CCT4/CCT8/NHP2/CCT7/RUVBL2/CCT5
BP	GO:0090685	RNA localization to nucleus	19	0.729506	1.5254	0.0240641	0.278397	0.256046	1721	tags=42%, list=14%, signal=36%	CCT3/CCT6A/CCT4/CCT8/NHP2/CCT7/RUVBL2/CCT5
BP	GO:0048485	sympathetic nervous system development	20	-0.793727	-1.55362	0.0241423	0.278864	0.256476	1570	tags=45%, list=12%, signal=40%	SOX11/HAND2/SEMA3A/PLXNA4/GATA3/PHOX2A/NTRK1/NRP1/SOX4
MF	GO:0046527	glucosyltransferase activity	15	0.786805	1.54683	0.0241808	0.278872	0.256483	845	tags=33%, list=7%, signal=31%	UGGT2/UGGT1/PLOD3/ALG5/ALG6
BP	GO:0022604	regulation of cell morphogenesis	254	-0.517645	-1.39766	0.0242738	0.279508	0.257068	1743	tags=19%, list=14%, signal=16%	MOV10/SRC/CXCR4/WDPCP/PTK2B/FBLN1/HEXB/SH3KBP1/EEF2K/CSF1R/KALRN/PALM/RAC3/F2/TACSTD2/FN1/CAPRIN1/SLC9A3R1/F11R/HCK/PTN/APOA1/ALDOA/PLXNA4/TRIOBP/CDKL5/ANKRD27/FZD4/PLXNA2/SPARC/HPN/EZR/GAS2/NEDD4L/EPS8/EPHA4/ZNF135/CAMSAP1/NRP1/MPL/SYT4/COCH/WNT5A/CDC42EP3/CLDN3/CSPG5/POSTN
BP	GO:0033559	unsaturated fatty acid metabolic process	69	-0.651673	-1.51649	0.0244961	0.281499	0.258899	1180	tags=19%, list=9%, signal=17%	ACOT8/PTGES/FAAH2/CYP2U1/HSD17B4/CES2/ALOX15B/PLA2G3/TBXAS1/CYP2J2/CYP1A1/FADS2/SCD5
CC	GO:0030127	COPII vesicle coat	13	0.795669	1.51383	0.024523	0.281499	0.258899	1750	tags=62%, list=14%, signal=53%	SEC24D/PDCD6/SEC13/TMED7/SEC31A/SEC23B/PEF1/SEC24A
CC	GO:0022625	cytosolic large ribosomal subunit	47	0.602505	1.51723	0.0245785	0.281699	0.259083	4189	tags=62%, list=33%, signal=42%	RPL5/MRPL1/RPL10/RPL35/RPL13/RPL11/RPL14/RPL28/RPL23A/RPL21/RPL37/RPL15/RPL36/RPL27A/RPL13A/RPL24/RPL35A/RPL31/RPL4/RPL8/RPL29/RPLP0/RPL26/RPL36A/RPLP1/RPL30/RPL7A/RPL23/RPL7L1
MF	GO:0043138	3'-5' DNA helicase activity	16	0.776115	1.55644	0.0247615	0.283356	0.260606	1280	tags=25%, list=10%, signal=23%	HELQ/DHX9/ASCC3/INO80
BP	GO:0042403	thyroid hormone metabolic process	20	-0.791478	-1.54922	0.0248928	0.284418	0.261583	807	tags=25%, list=6%, signal=23%	GATA3/IYD/HPN/SLC16A10/DIO1
CC	GO:0035371	microtubule plus-end	20	0.745445	1.58602	0.0253667	0.289384	0.266151	1377	tags=30%, list=11%, signal=27%	MAPRE1/DST/MAPRE2/DCTN1/CLIP1/CDK5RAP2
BP	GO:0006140	regulation of nucleotide metabolic process	96	0.508266	1.45041	0.0255015	0.289642	0.266389	666	tags=14%, list=5%, signal=13%	INS/JMJD8/NUP205/NUP35/EIF6/ARNT/PRKAG2/SEC13/VCP/NUP210/NUP188/NUP107/TPR
BP	GO:0035194	post-transcriptional gene silencing by RNA	115	0.480049	1.38568	0.0255975	0.289642	0.266389	1370	tags=20%, list=11%, signal=18%	NUP205/AGO1/NUP35/EIF6/DICER1/SEC13/NUP210/EIF4G1/NUP188/DDX6/DHX9/MAP2K2/NUP107/TPR/ESR1/ELAVL1/RBM4/NUP98/HENMT1/HELZ/PPP3CA/NUP155/NUP153
MF	GO:0015145	monosaccharide transmembrane transporter activity	14	-0.843345	-1.53622	0.0256283	0.289642	0.266389	586	tags=21%, list=5%, signal=20%	SLC2A2/SLC5A2/SLC5A9
CC	GO:1902555	endoribonuclease complex	27	0.688598	1.56909	0.0257078	0.289642	0.266389	2159	tags=26%, list=17%, signal=22%	AGO1/DICER1/DHX9/ERN1/POP1/RPP38/AGO4
BP	GO:1903034	regulation of response to wounding	132	-0.584473	-1.48074	0.0257796	0.289642	0.266389	2128	tags=28%, list=17%, signal=24%	CLDN19/SERPINE1/PRKCD/F2R/ITGB1/APOH/PLPP3/ANXA1/ADAMTS18/CXCR4/RTN4R/PTPRS/CERS2/HBEGF/SMAD3/FAP/F2/EPPK1/CADM4/PTN/GP1BA/PROC/PLAU/CD9/EPHA4/APOE/PDGFA/OCLN/SERPING1/PLG/WFDC1/ST3GAL4/MYOZ1/CAV1/MAP2K1/CLDN3/F11
CC	GO:0098800	inner mitochondrial membrane protein complex	89	0.51514	1.44507	0.0257866	0.289642	0.266389	3170	tags=36%, list=25%, signal=27%	FOXRED1/HSPA9/DNAJC11/UQCRC1/IMMT/CYC1/NDUFV2/PHB2/NDUFV1/SAMM50/BCS1L/MICU3/IMMP1L/UQCRQ/NDUFAF1/PPIF/NDUFA5/UQCRHL/DNAJC15/NDUFA13/NDUFB2/NDUFA10/AFG3L2/NDUFAB1/MTX2/NDUFA12/TIMM50/UQCRFS1/NDUFB6/PHB/NDUFA11/NDUFS2
CC	GO:0098552	side of membrane	348	-0.486894	-1.34653	0.0257991	0.289642	0.266389	2650	tags=33%, list=21%, signal=27%	FASLG/ADA/HYAL2/FES/CDH13/RACGAP1/IQGAP1/EEF1A1/CD3E/IGSF21/PRMT8/MYZAP/EBI3/KRT18/F10/P2RX1/GNAI1/IL1R1/CNR2/DAG1/CD3D/GFRA2/ACKR4/IL5RA/CDK16/CDIP1/NT5E/SLC4A3/ACKR3/ATP6AP2/STAC2/FOLR3/KRAS/HSPA8/TNFRSF14/GNA13/SYAP1/ANXA1/OSBPL2/CDH1/ESYT3/GNAS/CD40/GNG10/SRC/B4GALT1/CXCR4/RTN4R/GNAI2/RGS1/ENPEP/BTN3A3/FOLR2/CTSA/PTK2B/GHR/CSF3R/CLEC12B/GNG2/PKD2/ABCG2/PTPN4/PALM/FRK/F2/SEMA7A/S100A6/SCUBE1/C…
BP	GO:0014812	muscle cell migration	71	-0.652982	-1.52799	0.0258831	0.289642	0.266389	857	tags=24%, list=7%, signal=22%	ANXA1/NET1/MEGF10/SRC/TERT/IGFBP3/AIF1/NOX4/AKIRIN1/PLAU/DDR1/PDGFA/NDRG4/ACE/NRP1/ITGA2/POSTN
CC	GO:0098644	complex of collagen trimers	14	-0.842964	-1.53553	0.0258885	0.289642	0.266389	645	tags=36%, list=5%, signal=34%	OTOL1/COL1A1/COL11A1/COL1A2/LUM
CC	GO:0022627	cytosolic small ribosomal subunit	38	0.649512	1.57058	0.0259017	0.289642	0.266389	4145	tags=82%, list=33%, signal=55%	RPS5/EIF2A/RPS9/RPS13/DHX29/RPS21/LARP4/RPS6/RPS23/RPS3/UBA52/RPSA/RPS19/RPS18/RPS26/RPS28/EIF2D/RPS10/RPS7/RPS16/RPS27A/RPS29/RPS8/RPS12/RPS11/RPS17/RPS20/RPS15/RPS27/RPS25/RPS14
MF	GO:0070182	DNA polymerase binding	15	0.783721	1.54076	0.0259204	0.289642	0.266389	2508	tags=53%, list=20%, signal=43%	HSP90AA1/FANCD2/PTGES3/SMARCA4/RAD51/LONP1/NAT10/FANCI
BP	GO:0000045	autophagosome assembly	75	0.526893	1.43241	0.0259477	0.289642	0.266389	1971	tags=25%, list=16%, signal=22%	RAB3GAP2/STX12/VMP1/ATG101/LRRK2/NSFL1C/SCFD1/SEC22B/MFN2/ATG2A/ATG13/TMEM39A/RAB1B/PIP4K2C/MAP1LC3C/RAB1A/ATG16L1/RAB7A/SH3GLB1
BP	GO:0002694	regulation of leukocyte activation	344	-0.481622	-1.3296	0.0259527	0.289642	0.266389	1584	tags=20%, list=12%, signal=18%	TNFRSF13B/SOX11/HLX/SH3KBP1/PKN1/SOD1/CSK/PLA2G4A/ZFP36L2/PARP3/AIF1/TIRAP/ITPKB/BTK/RUNX3/MALT1/CD22/GPR137B/GRAP2/CRTAM/BPI/CLEC4D/CTSC/GNRH1/CD84/BLOC1S3/GATA2/ATP11C/ZC3H12A/HLA-DPB1/TGFBR2/IGF2/PIK3R1/GATA3/RORA/ITGAM/CD200/NRARP/PIK3R6/BCL10/TNFSF13B/LYN/SIRPA/BCL6/TMIGD2/DUSP10/SLC46A2/PDPK1/TESPA1/PLA2G3/BLK/NDFIP1/MMP14/IGLL1/CD209/HLA-DPA1/HES1/FOXF1/CD276/MPL/CAV1/LOXL3/SOX4/SFTPD/WNT5…
BP	GO:0016114	terpenoid biosynthetic process	11	-0.841931	-1.48298	0.0260012	0.289642	0.266389	405	tags=45%, list=3%, signal=44%	RBP1/BCO1/LSS/ALDH8A1/CYP1A1
BP	GO:0030193	regulation of blood coagulation	58	-0.673431	-1.5293	0.0260172	0.289642	0.266389	2363	tags=36%, list=19%, signal=30%	CPB2/SERPINF2/KNG1/SERPINE1/PRKCD/F2R/APOH/ADAMTS18/FAP/F2/GP1BA/PROC/PLAU/CD9/APOE/PDGFA/SERPING1/PLG/ST3GAL4/CAV1/F11
BP	GO:1900046	regulation of hemostasis	58	-0.673431	-1.5293	0.0260172	0.289642	0.266389	2363	tags=36%, list=19%, signal=30%	CPB2/SERPINF2/KNG1/SERPINE1/PRKCD/F2R/APOH/ADAMTS18/FAP/F2/GP1BA/PROC/PLAU/CD9/APOE/PDGFA/SERPING1/PLG/ST3GAL4/CAV1/F11
BP	GO:0009069	serine family amino acid metabolic process	32	-0.757754	-1.58714	0.0261369	0.290537	0.267212	340	tags=12%, list=3%, signal=12%	GGT1/GCSH/CDO1/CSAD
BP	GO:0030205	dermatan sulfate metabolic process	13	-0.84901	-1.53434	0.0262718	0.291598	0.268187	1113	tags=31%, list=9%, signal=28%	NCAN/VCAN/CSPG5/DCN
CC	GO:0030662	coated vesicle membrane	145	0.459706	1.36999	0.0263739	0.292106	0.268655	1662	tags=27%, list=13%, signal=24%	SEC24D/CFTR/EGF/AP3B2/SEC16A/CLTB/PDCD6/TMED10/SEC16B/EPN1/COPZ2/COPG2/SEC13/SYT11/AP1G2/LMAN1/SEC22B/TMED7/SEC31A/COPA/TMED2/COPE/KDELR2/TFRC/COPZ1/CLTC/ROR2/CLINT1/SYNRG/ARCN1/SCYL1/SEC23B/SYT9/USO1/PEF1/COPB1/COPB2/AP2A1/AP1G1
BP	GO:0050918	positive chemotaxis	49	-0.694456	-1.55566	0.0263968	0.292106	0.268655	1042	tags=29%, list=8%, signal=26%	COLEC10/VEGFC/FPR2/CXCL12/FGF8/CXCL10/ANGPT1/PGF/ANGPT2/HGF/NTF3/NRP1/ITGA2/WNT5A
BP	GO:0070203	regulation of establishment of protein localization to telomere	11	0.815376	1.50027	0.0266308	0.294106	0.270494	1721	tags=55%, list=14%, signal=47%	CCT3/CCT6A/CCT4/CCT8/CCT7/CCT5
CC	GO:0070160	tight junction	106	-0.606012	-1.48594	0.0266572	0.294106	0.270494	1294	tags=21%, list=10%, signal=19%	CXADR/ECT2/MICALL2/EPPK1/F11R/CLDN10/FRMPD2/LIN7A/SAPCD2/CLDN15/CYTH1/CLDN11/PARD6A/ILDR1/OCLN/CLDN34/POF1B/PLXDC1/PRKCZ/CLDN3/MXRA8/AOC1
BP	GO:0019835	cytolysis	18	-0.787232	-1.51388	0.026812	0.295372	0.271658	1332	tags=44%, list=10%, signal=40%	C6/F2/C8G/C8A/C8B/LYZ/C7/LBP
BP	GO:0034605	cellular response to heat	100	0.5007	1.41945	0.0268593	0.295383	0.271668	1370	tags=21%, list=11%, signal=19%	NUP205/HSP90AA1/PDCD6/NUP35/SEC13/VCP/NUP210/THBS1/NUP188/IRAK1/ATP2A2/NUP107/TPR/PTGES3/NUP98/BAG5/ATR/NUP155/DNAJC2/DAXX/NUP153
MF	GO:0016705	oxidoreductase activity, acting on paired donors, with incorporation or reduction of molecular oxygen	111	-0.590186	-1.45061	0.026893	0.295383	0.271668	1192	tags=23%, list=9%, signal=21%	ALKBH5/CYP27B1/CYP19A1/CYP4F22/CYP2U1/FMO5/CYP4B1/P3H2/EGLN1/PHF8/CYP51A1/CYP46A1/CYP27A1/CYP4V2/MSMO1/TBXAS1/CYP2R1/TYR/SQLE/SC5D/CYP2J2/CYP1A1/CYP3A4/EGLN3/FADS2/SCD5
BP	GO:0044331	cell-cell adhesion mediated by cadherin	22	-0.768933	-1.51923	0.0270874	0.29673	0.272907	684	tags=23%, list=5%, signal=22%	CDH2/RGCC/PLG/CDHR2/WNT5A
BP	GO:0014911	positive regulation of smooth muscle cell migration	32	-0.756401	-1.58431	0.0270961	0.29673	0.272907	234	tags=12%, list=2%, signal=12%	NOX4/NRP1/ITGA2/POSTN
BP	GO:0050655	dermatan sulfate proteoglycan metabolic process	16	-0.833816	-1.5535	0.0271681	0.297047	0.273199	1113	tags=25%, list=9%, signal=23%	NCAN/VCAN/CSPG5/DCN
CC	GO:0030125	clathrin vesicle coat	21	0.726068	1.54777	0.0272187	0.297047	0.273199	1980	tags=48%, list=16%, signal=40%	CLTB/EPN1/AP1G2/CLTC/CLINT1/SYNRG/AP2A1/AP1G1/AP2A2/AP2B1
BP	GO:0033044	regulation of chromosome organization	236	0.413284	1.29299	0.0272458	0.297047	0.273199	1782	tags=18%, list=14%, signal=16%	GCG/IL1B/XRN1/APC/LIF/ANAPC4/KMT2A/CCT3/LRRK2/CCT6A/TRIP13/USP7/CCT4/PRKCQ/TEN1/TPR/AXIN2/RIF1/HNRNPD/MNAT1/ISL1/CCT8/ATR/SSBP1/SETDB2/WAPL/SPDL1/SMG1/PAXBP1/UPF1/PSMG2/CDC6/CDK5RAP2/HNRNPU/CCT7/IK/RUVBL2/KMT2E/CCT5/TERF2IP/YLPM1/DYNC1LI1
BP	GO:0043470	regulation of carbohydrate catabolic process	76	0.545512	1.49164	0.0275594	0.299275	0.275248	666	tags=16%, list=5%, signal=15%	INS/JMJD8/NUP205/NUP35/EIF6/ARNT/PRKAG2/SEC13/NUP210/NUP188/NUP107/TPR
BP	GO:2000650	negative regulation of sodium ion transmembrane transporter activity	11	-0.839423	-1.47856	0.0276039	0.299275	0.275248	1306	tags=36%, list=10%, signal=33%	HECW1/SLC9A3R1/NEDD4L/ATP1A2
BP	GO:1904851	positive regulation of establishment of protein localization to telomere	10	0.821255	1.48656	0.0276225	0.299275	0.275248	1721	tags=60%, list=14%, signal=52%	CCT3/CCT6A/CCT4/CCT8/CCT7/CCT5
BP	GO:0007611	learning or memory	191	-0.527243	-1.38748	0.0276747	0.299275	0.275248	1343	tags=18%, list=11%, signal=16%	CDK5/JUN/KALRN/GRIN2B/EN1/VLDLR/SLC8A3/NFATC4/PIAS1/PLCB1/ADCY1/ADCY8/CLN3/PTN/RGS14/BRINP1/FGF13/ADGRB3/PLK2/GM2A/GRPR/APOE/NTRK1/PPP1R1B/NDRG4/ATP1A2/PTPRZ1/LGMN/NTF3/RIC8A/PRKCZ/BCHE/GATM/MUSK
MF	GO:0003756	protein disulfide isomerase activity	18	0.742033	1.51579	0.0277258	0.299275	0.275248	1130	tags=44%, list=9%, signal=41%	QSOX2/PDIA6/ERO1B/PDIA4/ERP44/TXNDC5/PDIA5/CRELD2
MF	GO:0016864	intramolecular oxidoreductase activity, transposing S-S bonds	18	0.742033	1.51579	0.0277258	0.299275	0.275248	1130	tags=44%, list=9%, signal=41%	QSOX2/PDIA6/ERO1B/PDIA4/ERP44/TXNDC5/PDIA5/CRELD2
BP	GO:0042219	cellular modified amino acid catabolic process	24	-0.792413	-1.59175	0.027768	0.299275	0.275248	1297	tags=33%, list=10%, signal=30%	ALDH4A1/GOT2/GGACT/DPEP1/GGT1/PRODH/GGT5/BHMT
BP	GO:0046639	negative regulation of alpha-beta T cell differentiation	18	-0.784809	-1.50922	0.0278142	0.299275	0.275248	2505	tags=56%, list=20%, signal=45%	SHH/CBFB/SMAD7/ANXA1/HLX/RUNX3/ZC3H12A/BCL6/LOXL3/RC3H2
CC	GO:0015629	actin cytoskeleton	395	-0.475477	-1.32385	0.0278289	0.299275	0.275248	2568	tags=29%, list=20%, signal=24%	EHBP1L1/BIN2/MYL9/HNRNPC/IQGAP1/PSTPIP2/EEF1A1/MYLK/VPS18/AHNAK/CLDN5/FLOT2/MYZAP/OPHN1/DCTN4/CORO1C/MYH11/MSRB1/KRT19/SYNPO2L/MYO6/PTPN12/PEAK1/XIRP2/PXN/TPM4/CORO2B/TAX1BP3/MYO1E/RAC2/MYO1H/LCP1/EPHA3/BAG3/PLS1/TNNC1/ABL1/EFR3B/LDB3/NEURL1B/MYO10/LSP1/ANXA1/CDH1/PSTPIP1/MYH7/MYH6/TNNI1/SRC/ACTB/MISP/MYL2/MYL1/KLHL2/TNNT1/MAEA/PPP1R9A/SLC2A1/WIPF1/AIF1/MYL4/KALRN/PKD2/FAM107A/RAB22A/RAC3/AIF1L/T…
BP	GO:0042493	response to drug	291	-0.49836	-1.35968	0.0278556	0.299275	0.275248	1194	tags=19%, list=9%, signal=17%	CCNB1/GAD1/ADCY1/PPP1R12A/SLC8A1/DPEP1/LOX/CYP2U1/ATP8B1/PTN/REN/KCNJ11/APOA1/BLOC1S3/TGFBR2/VEGFC/EEF2/LTA/PPM1E/GNPAT/GATA3/ARRB1/FGF8/CPS1/UQCRC2/SEMA3C/LYN/SFRP2/TLR3/NTRK1/SORD/ABCB1/ACER2/NR1I2/COL1A1/BCAR3/CYP2R1/WFDC1/ITGA2/ENO3/BGLAP/ABCB11/AACS/ABCG5/SLC10A1/RAP2A/CYP2J2/CYP1A1/QDPR/ABCG8/CYP3A4/BCHE/AMH/HSD11B2
BP	GO:0007030	Golgi organization	115	0.474552	1.36981	0.0280826	0.301276	0.277088	1708	tags=30%, list=13%, signal=27%	SEC16A/SURF4/TMED10/SEC16B/TRIP11/EHD3/VMP1/COG4/RAB2A/LRRK2/NSFL1C/NPLOC4/MAP2K2/LMAN1/COG1/TMED7/AKAP9/PDE4DIP/TMED4/TMED2/GORASP2/BAG5/ARL1/LMAN2L/GOLGB1/ARHGEF7/DYM/GOLGA2/TMED9/USO1/GBF1/COG7/RAB1A/GAK/LMAN2
BP	GO:0031503	protein-containing complex localization	241	0.417114	1.30682	0.0282784	0.302569	0.278278	2658	tags=29%, list=21%, signal=24%	NUP205/LCA5/TSC1/NUP35/TRIP11/EIF6/FYTTD1/TNFAIP2/SEC13/TTC30B/HSPB11/NUP210/KIF3A/NUP188/ADAM22/NUP107/TPR/YTHDC1/ABCE1/NSG1/EIF4A3/GPHN/NUP98/NSUN2/RCC2/CEP131/SDAD1/ATR/GRIPAP1/GLE1/SCRIB/SMG1/IFT57/UPF1/NUP155/KIF5A/NUP153/SRSF4/HNRNPU/LTV1/RRS1/NCBP2/SSNA1/IFT81/IFT43/IFT22/POLR2D/AP2B1/RAB11A/XPOT/CEP112/CPSF1/DLG1/NUP160/SSB/NUP85/NUP88/EIF4E/PCM1/NUP133/DNM1/ATAD1/EXOC3L4/U2AF1/RAN/IFT80/…
BP	GO:0008211	glucocorticoid metabolic process	18	-0.78106	-1.50201	0.0283154	0.302569	0.278278	120	tags=22%, list=1%, signal=22%	BMP5/APOA1/HSD3B1/HSD11B2
CC	GO:0009897	external side of plasma membrane	183	-0.533086	-1.40111	0.0283261	0.302569	0.278278	2405	tags=32%, list=19%, signal=26%	EBI3/KRT18/F10/P2RX1/IL1R1/DAG1/CD3D/GFRA2/ACKR4/IL5RA/NT5E/SLC4A3/ACKR3/ATP6AP2/FOLR3/TNFRSF14/ANXA1/CD40/B4GALT1/CXCR4/RTN4R/ENPEP/BTN3A3/FOLR2/GHR/CSF3R/CLEC12B/ABCG2/F2/SEMA7A/SCUBE1/CD22/P2RY12/GP1BA/TGFBR2/ITGAM/CXCL12/ANTXR1/FGF8/MCAM/CCR9/PRLR/CXCL10/CEACAM5/CD200R1/ALCAM/CD302/IGLL1/CD209/ABCB1/CD69/PLG/ACE/SCARA5/CD276/ITGA2/CD248/CCR6
BP	GO:0006368	transcription elongation from RNA polymerase II promoter	77	0.516252	1.41751	0.0285076	0.303739	0.279354	2525	tags=22%, list=20%, signal=18%	ELL2/CCNH/ADRM1/MNAT1/SOX10/HNRNPU/SSRP1/EAPP/GTF2H3/NCBP2/POLR2D/GTF2H5/SUPT5H/LEO1/CCNK/ERCC2/CDK12
MF	GO:0019199	transmembrane receptor protein kinase activity	64	-0.660095	-1.51436	0.028518	0.303739	0.279354	2013	tags=27%, list=16%, signal=22%	EPHA3/TYRO3/EPHA6/EPHB3/MERTK/CSF1R/ALK/IGF1R/TGFBR2/BMPR1B/EPHA4/DDR1/NTRK1/FLT3/NRP1/SOSTDC1/MUSK
BP	GO:0090287	regulation of cellular response to growth factor stimulus	227	-0.513567	-1.37526	0.0286284	0.304475	0.280031	1480	tags=18%, list=12%, signal=16%	ONECUT1/FGFBP3/DAB2IP/CDKN2B/SMAD3/SFRP5/CFLAR/SMAD6/FLCN/DLL1/AGT/LOX/CADM4/FSTL1/TGFBR2/VEGFC/GATA3/TMEM204/XDH/CRB2/VWC2L/FZD4/SFRP2/PDPK1/PBLD/CITED1/HOXA13/MMRN2/HES1/CAV2/TNMD/NTF3/CAV1/WNT5A/SOSTDC1/HTRA3/MSX1/DCN/HTRA1/LRIT3
BP	GO:0000959	mitochondrial RNA metabolic process	41	0.606541	1.48939	0.028689	0.30465	0.280191	1153	tags=17%, list=9%, signal=16%	TRMT10A/LRPPRC/TBRG4/MTO1/SLIRP/FASTKD1/GRSF1
BP	GO:0055090	acylglycerol homeostasis	23	-0.764594	-1.52355	0.0287686	0.30465	0.280191	1700	tags=48%, list=13%, signal=42%	ADORA1/SIRT1/APOA4/C1QTNF3/APOA1/RORA/APOE/APOC2/DGAT2/ABCG5/ABCG8
BP	GO:0070328	triglyceride homeostasis	23	-0.764594	-1.52355	0.0287686	0.30465	0.280191	1700	tags=48%, list=13%, signal=42%	ADORA1/SIRT1/APOA4/C1QTNF3/APOA1/RORA/APOE/APOC2/DGAT2/ABCG5/ABCG8
MF	GO:0004713	protein tyrosine kinase activity	114	-0.592569	-1.45757	0.0288307	0.30487	0.280394	2096	tags=30%, list=16%, signal=26%	PEAK1/PRKCD/MAP2K5/EPHA3/CLK4/ABL1/TYRO3/EPHA6/MAP2K7/SRC/EPHB3/MERTK/PTK2B/CSK/CSF1R/ALK/FRK/BTK/IGF1R/HCK/TTN/MATK/STYK1/AATK/TEC/TEC/LYN/BLK/EPHA4/DDR1/NTRK1/FLT3/NRP1/MAP2K1/MUSK
BP	GO:0071692	protein localization to extracellular region	288	0.406739	1.29707	0.0289931	0.306149	0.28157	785	tags=10%, list=6%, signal=10%	RFX6/INS/NAGPA/GCG/P3H1/MIDN/SEL1L/IL1B/CFTR/CPLX3/VIP/PREB/PDIA4/GJA1/TMED10/PDX1/ABCC8/OPRM1/CANX/COPG2/STXBP5L/ADCY5/PTPN23/SLC8B1/RFX3/DNAJC1/PORCN/PTPRN2/RAB11FIP2/HNF1B
BP	GO:0006164	purine nucleotide biosynthetic process	139	-0.560787	-1.4275	0.0290395	0.306201	0.281618	1139	tags=13%, list=9%, signal=12%	ADCY1/ADCY8/HACD2/ALDOA/CBR4/NPR1/FASN/AK1/APRT/AMPD1/GSTZ1/PPT1/ACLY/PID1/NME4/ACSL5/ACSS2/SCD5
BP	GO:0055078	sodium ion homeostasis	35	-0.714986	-1.52602	0.0292143	0.307421	0.28274	1700	tags=26%, list=13%, signal=22%	ADORA2A/ADORA1/GNAI2/AGT/SLC8A1/NPR1/NEDD4L/ATP1A2/C7
BP	GO:0010769	regulation of cell morphogenesis involved in differentiation	81	-0.617395	-1.47098	0.0292651	0.307421	0.28274	1372	tags=17%, list=11%, signal=16%	EEF2K/KALRN/RAC3/TACSTD2/CAPRIN1/APOA1/TRIOBP/CDKL5/ANKRD27/EPHA4/NRP1/MPL/CSPG5/POSTN
BP	GO:0030595	leukocyte chemotaxis	147	-0.562901	-1.44244	0.0292802	0.307421	0.28274	1363	tags=19%, list=11%, signal=17%	CSF1R/AIF1/TIRAP/CXADR/TRPM2/DPEP1/PTN/CKLF/VEGFC/AKIRIN1/FPR2/CXCL12/SWAP70/CXCL10/CMKLR1/LYN/PGF/MST1/LGMN/S100A14/SFTPD/WNT5A/CXCL14/MSMP/CCL25/CSF1/CCR6/LBP
BP	GO:0007004	telomere maintenance via telomerase	61	0.558195	1.4744	0.0294347	0.308313	0.28356	2564	tags=39%, list=20%, signal=32%	XRN1/HSP90AA1/CCT3/CCT6A/CCT4/PRKCQ/TEN1/PTGES3/CCT8/ATR/RFC1/NHP2/HNRNPU/CCT7/CCT5/TELO2/TERF2IP/HNRNPA1/PNKP/TNKS/NAT10/NEK7/PINX1/TCP1
BP	GO:0061178	regulation of insulin secretion involved in cellular response to glucose stimulus	46	0.595233	1.48915	0.0294487	0.308313	0.28356	460	tags=11%, list=4%, signal=11%	RFX6/GCG/CFTR/PDX1/ADCY5
BP	GO:0008210	estrogen metabolic process	25	-0.762744	-1.54256	0.0295724	0.308802	0.28401	1124	tags=28%, list=9%, signal=26%	CYP19A1/HSD17B4/HSD17B7/HSD3B1/RDH8/CYP1A1/CYP3A4
MF	GO:0005509	calcium ion binding	486	-0.456754	-1.28462	0.0295791	0.308802	0.28401	1676	tags=23%, list=13%, signal=20%	CDH4/MASP1/OCM/ANXA5/RGN/CDH11/SPOCK2/MYL2/RPH3A/FBLN1/MYL1/EFHB/CDH18/SYT7/DNASE1L3/PLA2G4A/MAN1A1/MAN1C1/EEF2K/EGFL6/AIF1/MYL4/PKD2/VLDLR/F2/TRPM2/AIF1L/PROZ/CRP/DLL1/S100A6/SCUBE1/PLCB1/FAT3/HRC/NCAN/PRRG1/SLC8A1/PCDHB16/CLEC4E/CASQ1/ADGRV1/CLSTN2/CELSR1/PLCB2/TTN/SCUBE3/FSTL1/PROC/CD93/F9/FSTL5/ADGRL4/PCDH19/AMY2A/PPP3R1/NID1/SELL/DLL4/ALOX15B/MATN4/VWA2/S100G/GSN/CRB2/PCDH7/MEGF6/SWAP70/CDH2…
BP	GO:0001503	ossification	311	-0.489733	-1.34094	0.0297408	0.309822	0.284948	2192	tags=29%, list=17%, signal=25%	FBXL15/TNFSF11/YAP1/PBX1/SMAD7/NOG/TPM4/ATRAID/PPARG/TP53INP2/BMP7/GPM6B/NOCT/COL2A1/CREB3L1/GNAS/PHOSPHO1/PTGER4/NPR2/MATN1/CDH11/ZHX3/PTK2B/SOX11/CDK6/PTHLH/SMAD5/IGFBP3/HOXA2/SMAD1/GLI1/SMAD3/HAND2/BMP5/SMPD3/SMAD6/PTH1R/MSX2/SEMA7A/MRC2/RUNX3/CYP27B1/ITGA11/WNT10B/SLC8A1/LOX/ADGRV1/PTN/EIF2AK3/IGSF10/IGF2/ACP5/VEGFC/HEMGN/FASN/HSD17B4/PHEX/MAPK14/BMPR1B/RORB/ANKH/VCAN/SPARC/TMEM119/SFRP2/LTF/…
MF	GO:0016616	oxidoreductase activity, acting on the CH-OH group of donors, NAD or NADP as acceptor	86	-0.618659	-1.48354	0.0297607	0.309822	0.284948	884	tags=20%, list=7%, signal=19%	CBR4/FASN/HSD17B4/ADH5/ME2/KCNAB1/RDH16/HMGCR/RDH11/EHHADH/SORD/GPD1/HSD17B7/DHRS3/HSD3B1/RDH8/HSD11B2
CC	GO:0070971	endoplasmic reticulum exit site	22	0.7078	1.53228	0.0299592	0.311159	0.286178	762	tags=36%, list=6%, signal=34%	SEC24D/SEC16A/PREB/PDCD6/YIPF5/SEC16B/LRRK2/SEC31A
BP	GO:0030204	chondroitin sulfate metabolic process	32	-0.752456	-1.57605	0.0299735	0.311159	0.286178	1612	tags=34%, list=13%, signal=30%	SPOCK2/HEXB/ARSB/CHST15/NCAN/CHPF2/VCAN/IDS/NDNF/CSPG5/DCN
BP	GO:0035773	insulin secretion involved in cellular response to glucose stimulus	53	0.584802	1.51058	0.0300513	0.311279	0.286288	740	tags=13%, list=6%, signal=12%	RFX6/GCG/CFTR/PDX1/ADCY5/PTPRN2/RAB11FIP2
BP	GO:0017144	drug metabolic process	27	-0.775767	-1.59319	0.0300694	0.311279	0.286288	1076	tags=44%, list=8%, signal=41%	CYP2A13/AOX1/DPEP1/CYP2U1/FMO5/NR1I2/CYP2R1/ABCB11/CYP2J2/CYP1A1/CYP3A4/BCHE
BP	GO:0001573	ganglioside metabolic process	18	-0.778514	-1.49711	0.03032	0.313434	0.28827	1513	tags=44%, list=12%, signal=39%	NEU1/ST3GAL5/HEXB/ST6GALNAC6/B3GALT4/B4GALT5/GM2A/ST8SIA2
MF	GO:0008238	exopeptidase activity	72	-0.630736	-1.47675	0.0303844	0.313661	0.288479	1210	tags=25%, list=10%, signal=23%	FAP/CTSH/SCPEP1/PRCP/ANPEP/DPEP1/CPA2/CTSC/HPN/MMP14/METAP2/CPN1/CPXM1/CPVL/ACE/CPZ/CPA6/F11
BP	GO:0110148	biomineralization	117	-0.586483	-1.45233	0.0304958	0.314371	0.289132	1946	tags=26%, list=15%, signal=22%	BMP7/GPM6B/TBX1/PHOSPHO1/MATN1/PTK2B/PTHLH/SMAD3/SMPD3/PTH1R/CYP27B1/WNT10B/SLC8A1/LOX/ADGRV1/PTN/EIF2AK3/PHEX/BMPR1B/ANKH/OTOL1/TMEM119/LTF/COL1A1/COL1A2/SOX9/BGLAP/AHSG/SNX10/ECM1
MF	GO:0015144	carbohydrate transmembrane transporter activity	25	-0.758378	-1.53373	0.0305664	0.314659	0.289397	586	tags=28%, list=5%, signal=27%	AQP10/AQP9/SLC2A1/SLC2A8/SLC2A2/SLC5A2/SLC5A9
BP	GO:0070861	regulation of protein exit from endoplasmic reticulum	22	0.707326	1.53126	0.0307129	0.315726	0.290379	857	tags=27%, list=7%, signal=25%	DERL2/SEC16A/SEC16B/EDEM1/TM9SF4/ERLEC1
BP	GO:1904874	positive regulation of telomerase RNA localization to Cajal body	15	0.771834	1.5174	0.0307913	0.316092	0.290715	1721	tags=53%, list=14%, signal=46%	CCT3/CCT6A/CCT4/CCT8/NHP2/CCT7/RUVBL2/CCT5
BP	GO:0030206	chondroitin sulfate biosynthetic process	21	-0.791369	-1.5554	0.0308594	0.316351	0.290953	1360	tags=29%, list=11%, signal=26%	CHST15/NCAN/CHPF2/VCAN/CSPG5/DCN
BP	GO:0045670	regulation of osteoclast differentiation	43	-0.703839	-1.55302	0.0309059	0.316389	0.290988	1122	tags=26%, list=9%, signal=23%	GPR68/GPR137B/OCSTAMP/PIK3R1/LRRC17/CA2/LTF/RASSF2/TLR3/BGLAP/CSF1
BP	GO:0042471	ear morphogenesis	91	-0.605797	-1.45435	0.0309602	0.316506	0.291096	2005	tags=31%, list=16%, signal=26%	PLS1/SLC44A4/TBX1/COL2A1/MAFB/USH1C/WDPCP/SOBP/HOXA2/SOD1/SLC9A3R1/HESX1/GATA2/TRIOBP/GATA3/PRRX1/FGF8/FZD2/TSHZ1/NKX3-2/FOXI1/HPN/MYO7A/COL11A1/SOX9/WNT5A/CTHRC1/MSX1
BP	GO:0008217	regulation of blood pressure	135	-0.573664	-1.45141	0.0310272	0.316752	0.291321	2110	tags=29%, list=17%, signal=24%	CORO2B/HMOX1/PPARG/ATP6AP2/F2R/CMA1/CTSG/ID2/MYH6/NPR2/ADORA1/ENPEP/RENBP/SOD1/SMAD3/ASIC2/DLL1/AGT/SCPEP1/F11R/PRCP/ANPEP/AGTRAP/REN/EMP2/EDNRA/GJA5/GLP1R/VEGFC/NPR1/ADH5/AVPR2/NPR3/GCH1/ATP1A2/ACE/COL1A2/HSD11B2/POSTN
BP	GO:0071675	regulation of mononuclear cell migration	75	-0.621287	-1.46721	0.0310834	0.316887	0.291446	1732	tags=31%, list=14%, signal=27%	C5AR1/ADAM10/PTK2B/JAM2/BMP5/CSF1R/AIF1/PLCB1/AKIRIN1/FPR2/CXCL12/CD200/CXCL10/CMKLR1/CD200R1/LYN/LGMN/S100A14/WNT5A/CXCL14/CSF1/ECM1/CCR6
BP	GO:0017038	protein import	158	0.439308	1.32933	0.0312153	0.317329	0.291852	1581	tags=19%, list=12%, signal=17%	HSPD1/CABP1/HEATR3/HSP90AA1/NUP35/MED1/SEC13/UFM1/PEX10/LRRK2/HSPA4/NUP188/NUP107/TPR/ELAVL1/IPO4/APOD/TOMM20/IPO5/NUP98/IPO7/PPP3CA/PHB2/NUP155/NUP153/CSE1L/FLNA/KPNB1/SAMM50/NUTF2
BP	GO:0007517	muscle organ development	256	-0.501012	-1.35206	0.03125	0.317329	0.291852	2023	tags=23%, list=16%, signal=20%	TCF12/MAPK12/TNNC1/TBX1/NPHS1/MYH7/MYH6/MEGF10/SGCE/ZFHX3/SIRT1/MYL2/ASB2/SOX11/SPEG/HLX/CDK5/WT1/TBX20/HBEGF/SMAD3/DSP/TCF15/CFLAR/POU6F1/TNNT2/DLL1/BTBD1/ITGA11/WNT10B/LOX/HMG20B/CASQ1/CHD2/MYOM2/TTN/IGF2/POPDC3/ELN/AKIRIN1/EEF2/MAPK14/DLL4/FGF8/KCNAB1/FZD2/CXCL10/MRAS/MYH3/SGCB/PAX5/COL11A1/CAV2/SRPK3/MYOZ1/MYLPF/CAV1/WNT5A/MSX1/DCN
BP	GO:0042475	odontogenesis of dentin-containing tooth	64	-0.657952	-1.50944	0.0312557	0.317329	0.291852	1534	tags=17%, list=12%, signal=15%	CSF3R/BAX/HAND2/SMPD3/FGF8/CA2/PERP/SOSTDC1/MSX1/CSF1/HTRA1
BP	GO:0061458	reproductive system development	326	-0.483997	-1.32838	0.0312995	0.317337	0.29186	1967	tags=22%, list=15%, signal=19%	WNT2B/BMP7/ST14/EOMES/TYRO3/COL9A3/ANXA1/HOXA9/ADCYAP1/RSPO3/GHSR/SRC/GATA4/SPINT1/SIRT1/CRIP1/MERTK/KLHL10/WT1/GLI1/SOD1/BAX/NODAL/BMP5/PKD2/FRS2/EPAS1/BRCA2/CYP27B1/CYP19A1/EPOR/CDX4/RBP4/SEMA3A/PTN/GNRH1/TNFSF10/REN/HESX1/GATA2/BOK/IGF2/HSD17B4/GATA3/ARRB1/MAPK14/FGF8/ALOX15B/BMPR1B/INHBB/FZD4/SFRP2/PSAP/GAS2/TLR3/MMP14/NTRK1/CITED1/PLAG1/SYCP2/KITLG/PGR/HOXA13/HES1/NR0B1/DMC1/SOX9/WNT5A/LHX1/…
BP	GO:0008015	blood circulation	413	-0.465018	-1.29795	0.0314319	0.317989	0.29246	2123	tags=24%, list=17%, signal=21%	PIK3CG/CORO2B/HMOX1/SLC4A3/SREBF1/PPARG/ATP6AP2/ADORA2A/F2R/KCNE4/DSG2/CMA1/TNNC1/KCNJ2/TRDN/CTSG/ID2/MYH7/MYH6/NPR2/TNNI1/SRC/CXCR4/ADORA1/GATA4/ENPEP/MYL2/CACNG2/ADORA3/MYL1/SMAD5/FGFBP3/RENBP/SOD1/TBX20/HBEGF/GAA/SMAD3/DSP/FXYD3/HOXB2/ASIC2/MYL4/CACNA1S/TMEM38A/CXADR/EPAS1/CRP/TNNT2/SLC8A3/DLL1/CACNA1D/AGT/SCPEP1/HRC/F11R/SLC8A1/PRCP/ANPEP/CYB5R3/SEMA3A/CASQ1/BIN1/AGTRAP/REN/KCNJ11/EMP2/TTN/ED…
BP	GO:0010171	body morphogenesis	44	-0.694963	-1.53164	0.0315168	0.317989	0.29246	460	tags=16%, list=4%, signal=15%	MYH3/CSRNP1/COL1A1/CRISPLD1/CRISPLD2/MSX1/MMP2
BP	GO:0006590	thyroid hormone generation	17	-0.807257	-1.533	0.0315325	0.317989	0.29246	807	tags=29%, list=6%, signal=28%	GATA3/IYD/HPN/SLC16A10/DIO1
BP	GO:0051693	actin filament capping	27	-0.770048	-1.58144	0.0315361	0.317989	0.29246	1073	tags=33%, list=8%, signal=31%	TMOD4/TMOD3/TRIOBP/SPTBN5/GSN/EPS8/TMOD1/AVIL/TWF2
BP	GO:0006281	DNA repair	461	0.367398	1.2187	0.0316216	0.318416	0.292852	2865	tags=26%, list=23%, signal=21%	TEX12/ZSWIM7/PSMD14/UFL1/APTX/CCNH/RAD1/HELQ/VCP/APLF/RAD23B/REV3L/EME1/NPLOC4/TRIP13/USP7/FAAP24/CEP164/DHX9/COPS4/ASCC3/FANCD2/AXIN2/RIF1/FANCA/MNAT1/TRIP12/RAD9A/TTC5/COPS8/ATR/ERCC6/BOD1L1/SMG1/FMN2/PARP4/RFC1/UPF1/INO80/RAD23A/FANCB/WDHD1/PPP5C/RBX1/SIRT7/BCCIP/RAD51C/SSRP1/PSME4/TP53BP1/NPAS2/HSF1/MMS19/SMC3/TAOK3/PRPF19/REC8/RAD51/RUVBL2/RAD54L/UVRAG/PRKDC/TERF2IP/GTF2H3/ANKLE1/ASCC1/NSMCE…
BP	GO:0002521	leukocyte differentiation	366	-0.463253	-1.28252	0.0318021	0.319311	0.293675	2006	tags=25%, list=16%, signal=21%	ITGB1/TLR9/ABL1/EFNA2/JMJD6/BLNK/EOMES/TYRO3/MAFB/ANXA1/TPD52/GNAS/PTGER4/PCK1/OSTM1/SRC/LYL1/DOCK10/SIRT1/MERTK/SLAMF6/PTK2B/YY1/CDK6/HLX/ONECUT1/SOD1/BAX/JUN/ZFP36L2/CSF1R/MFNG/ITPKB/BTK/TRPM2/DLL1/RUNX3/C1QC/MALT1/GPR68/GPR137B/CRTAM/ITM2A/DOCK11/GATA2/FZD7/ATP11C/OCSTAMP/ZC3H12A/TGFBR2/FASN/PIK3R1/GATA3/RORA/MAPK14/DLL4/TMEM176B/NRARP/GAB3/CCR9/PIK3R6/SPI1/LRRC17/LYN/BCL6/CA2/DUSP10/SLC46A2/L…
BP	GO:0070202	regulation of establishment of protein localization to chromosome	12	0.803937	1.4996	0.031835	0.319311	0.293675	1721	tags=50%, list=14%, signal=43%	CCT3/CCT6A/CCT4/CCT8/CCT7/CCT5
BP	GO:0042063	gliogenesis	231	-0.522014	-1.40147	0.0318402	0.319311	0.293675	1849	tags=23%, list=15%, signal=20%	ANXA1/TNFRSF1B/ADCYAP1/C5AR1/METRN/CXCR4/SPINT1/ASPA/PTK2B/SOX11/CDK6/HEXB/CERS2/CDK5/DAB2IP/SOD1/CSK/HDAC11/CSF1R/ADGRG6/F2/SLC8A3/DLL1/GPR157/E2F1/P2RY12/BIN1/PTN/C1QA/BOK/EEF2/CD9/LTA/FPR2/GSN/B4GALT5/CDH2/LYN/DUSP10/EPHA4/MMP14/PLAG1/KLF15/BACE2/HES1/PTPRZ1/SOX9/NDRG1/SOX4/CDKN2C/MAP2K1/CSF1/CSPG5/MXRA8
BP	GO:1904814	regulation of protein localization to chromosome, telomeric region	13	0.779988	1.484	0.0319327	0.319663	0.293999	1721	tags=46%, list=14%, signal=40%	CCT3/CCT6A/CCT4/CCT8/CCT7/CCT5
MF	GO:0008509	anion transmembrane transporter activity	346	-0.484489	-1.33876	0.0319619	0.319663	0.293999	742	tags=10%, list=6%, signal=9%	TTYH3/SLC7A9/ANKH/SLC48A1/SLC2A2/SLC25A33/CLCN1/CLCN2/ABCB1/SLC7A2/SLCO2A1/SLC5A2/SLC37A4/SLC25A30/ABCA12/SLC6A6/SLC6A19/ABCB11/SLC13A5/SLC15A2/SLC10A1/SLC6A7/SLC25A48/SLC10A2/SLC15A1/SLC16A10/SFXN5/SLC6A18/SLC22A6/FLVCR2/SLC16A12/SLC5A9/SLC13A4
BP	GO:0010001	glial cell differentiation	177	-0.543163	-1.42381	0.0322029	0.321592	0.295773	1732	tags=21%, list=14%, signal=19%	C5AR1/METRN/CXCR4/SPINT1/ASPA/SOX11/CDK6/CDK5/SOD1/CSK/HDAC11/ADGRG6/F2/SLC8A3/DLL1/GPR157/BIN1/PTN/C1QA/BOK/FPR2/GSN/B4GALT5/CDH2/LYN/DUSP10/EPHA4/KLF15/BACE2/HES1/PTPRZ1/SOX9/NDRG1/SOX4/CDKN2C/MAP2K1/CSPG5/MXRA8
BP	GO:0003416	endochondral bone growth	19	-0.77614	-1.50414	0.0322708	0.321592	0.295773	1087	tags=26%, list=9%, signal=24%	MATN1/BNC2/TGFBR2/SOX9/ECM1
BP	GO:1990173	protein localization to nucleoplasm	13	0.77905	1.48221	0.0322855	0.321592	0.295773	1721	tags=46%, list=14%, signal=40%	CCT3/CCT6A/CCT4/CCT8/CCT7/CCT5
CC	GO:0045177	apical part of cell	319	-0.478716	-1.31307	0.032413	0.321665	0.295841	2126	tags=29%, list=17%, signal=25%	CPO/KCNA1/SLC7A8/CTSK/ZMYND10/ATP6AP2/PLD1/KCNE4/TLR9/DSG2/DYNC2LI1/SLC22A5/EPS15/SLC44A4/ANXA1/IGSF5/ABCC5/USH1C/GNAS/AQP10/MGAM/CTSB/C5AR1/ENPEP/WDPCP/SLC52A3/OTOA/PDZK1/SLC2A1/FAP/SLC34A2/PTH1R/ABCG2/PFKM/SLC29A1/FN1/SLC3A2/ADGRG2/DLL1/PTPRH/ATP6V1C1/SLC9A3R1/ADCY8/RAB27A/DPEP1/USH2A/ATP8B1/HIP1R/REN/STK26/EMP2/RAB17/NOX4/CFAP126/SPTBN5/S100G/CRB2/VAMP3/SLC7A9/CDH2/CEACAM5/GM2A/CA2/HPN/SLC2A2/…
BP	GO:0009408	response to heat	129	0.472054	1.38447	0.032512	0.321665	0.295841	1370	tags=19%, list=11%, signal=17%	NUP205/HSP90AA1/PDCD6/NUP35/CALCA/SEC13/VCP/SST/EIF2B1/NUP210/THBS1/NUP188/IRAK1/ATP2A2/NUP107/TPR/PTGES3/NUP98/BAG5/ATR/NUP155/DNAJC2/DAXX/NUP153
CC	GO:0046540	U4/U6 x U5 tri-snRNP complex	30	0.667612	1.53982	0.0325147	0.321665	0.295841	3386	tags=53%, list=27%, signal=39%	PRPF8/SNRNP200/SNRPN/PRPF31/EFTUD2/SNRPG/PPIH/SNRPF/LSM6/LSM5/SNU13/SNRPE/PRPF3/DDX23/SNRPD2/SNRPD1
CC	GO:0097526	spliceosomal tri-snRNP complex	30	0.667612	1.53982	0.0325147	0.321665	0.295841	3386	tags=53%, list=27%, signal=39%	PRPF8/SNRNP200/SNRPN/PRPF31/EFTUD2/SNRPG/PPIH/SNRPF/LSM6/LSM5/SNU13/SNRPE/PRPF3/DDX23/SNRPD2/SNRPD1
BP	GO:0006829	zinc ion transport	21	0.718948	1.53259	0.0325482	0.321665	0.295841	211	tags=19%, list=2%, signal=19%	SLC39A14/SLC30A5/SLC39A10/SLC39A7
MF	GO:0019956	chemokine binding	22	-0.759328	-1.50026	0.0325544	0.321665	0.295841	717	tags=36%, list=6%, signal=34%	ACKR4/ACKR3/ITGB1/CXCR4/CCR9/A2M/PLP2/CCR6
MF	GO:0005216	ion channel activity	302	0.385971	1.2362	0.0331505	0.327118	0.300855	883	tags=11%, list=7%, signal=10%	KCNG3/GRIK1/KCNK16/SCN4A/PIEZO2/CFTR/ANXA2/KCNJ15/P2RX2/GABRR3/ABCC8/OPRM1/SCN3B/TRPC7/GPM6A/NMUR2/KCND1/KCNJ12/TTYH1/TRPM1/TMEM63C/SEC61A1/SLC4A11/KCNJ1/CNGB1/TRPM7/TMCO1/KCNJ5/CHRNB4/KCNIP3/ANO7/ASIC1
BP	GO:1904872	regulation of telomerase RNA localization to Cajal body	18	0.731314	1.49389	0.0333081	0.328234	0.301882	1721	tags=44%, list=14%, signal=38%	CCT3/CCT6A/CCT4/CCT8/NHP2/CCT7/RUVBL2/CCT5
BP	GO:0071897	DNA biosynthetic process	159	0.440843	1.33173	0.0334049	0.328599	0.302218	1496	tags=16%, list=12%, signal=15%	TEP1/TEX12/XRN1/HSP90AA1/GJA1/GRHL2/VCP/CCT3/REV3L/CCT6A/DACH1/NPLOC4/CCT4/PRKCQ/TEN1/PTGES3/SH2B1/HNRNPD/CCT8/ATR/PARP4/RFC1/DNAJC2/NHP2/HNRNPU/CCT7
BP	GO:0070168	negative regulation of biomineral tissue development	20	-0.774208	-1.51541	0.0334383	0.328599	0.302218	232	tags=20%, list=2%, signal=20%	PTK2B/SOX9/AHSG/ECM1
BP	GO:0007219	Notch signaling pathway	150	-0.558059	-1.43632	0.0334787	0.328599	0.302218	1728	tags=21%, list=14%, signal=19%	IFT172/BMP7/ANGPT4/NEURL1B/SRC/HOXD3/WWC1/ADAM10/ONECUT1/DTX2/RFNG/TMEM100/MFNG/DLL1/GATA2/TGFBR2/ARRB1/DLL4/NRARP/KAT2B/BCL6/GAS2/MMP14/DLK2/HES1/NR0B2/TSPAN15/ELF3/TSPAN5/SOX9/PERP/POSTN
BP	GO:0043467	regulation of generation of precursor metabolites and energy	129	0.471092	1.38165	0.0335693	0.328965	0.302555	1392	tags=22%, list=11%, signal=20%	INS/JMJD8/NUP205/NUP35/EIF6/ARNT/PRKAG2/SEC13/CHCHD2/VCP/CISD1/NUP210/NUP188/PRDM16/ABCD1/NUP107/TPR/TACO1/NUP98/TRAP1/PPP1R3A/GHITM/HDAC4/PHB2/NUP155/PRELID1/NUP153/COX17
BP	GO:1901214	regulation of neuron death	249	-0.500767	-1.3492	0.0336658	0.328965	0.302555	2055	tags=24%, list=16%, signal=21%	ADORA2A/KDM2B/F2R/KRAS/ABL1/TYRO3/GABRA5/KIF14/TNFRSF1B/C5AR1/ADORA1/SIRT1/TERT/PTK2B/GRIK5/GRIK2/CDK5/RAPSN/SOD1/BAX/PARK7/JUN/AGAP2/GRIN2B/EN1/CDC34/DHCR24/NFATC4/CLN3/C1QA/BOK/SIGMAR1/DDIT4/GATA3/ARRB1/ITGAM/CD200/FGF8/NENF/TRAF2/CD200R1/PM20D1/ANGPT1/PDPK1/PLA2G3/CHP1/RRAS2/TOX3/NDNF/PPT1/APOE/NTRK1/CITED1/PTPRZ1/LGMN/NTF3/WNT5A/EPO/BACE1/CSF1/EGLN3
BP	GO:0060560	developmental growth involved in morphogenesis	197	-0.516539	-1.36354	0.0336788	0.328965	0.302555	1022	tags=13%, list=8%, signal=12%	SEMA3A/PLXNA4/TGFBR2/SHTN1/SEMA3D/MAP2/CDKL5/CXCL12/FGF13/DSCAM/SEMA3C/SFRP2/ALCAM/NEDD4L/DDR1/APOE/TWF2/NRP1/SOX9/SYT4/WNT5A/LHX1/CSF1/PRKCZ/POSTN
BP	GO:0045599	negative regulation of fat cell differentiation	39	-0.715927	-1.56526	0.0336943	0.328965	0.302555	1650	tags=41%, list=13%, signal=36%	CCDC85B/JDP2/YAP1/SIRT1/SMAD3/ZFP36L2/FLCN/E2F1/WNT10B/GATA2/GATA3/RORA/C1QL4/SORT1/WNT5A/MMP11
BP	GO:0060485	mesenchyme development	226	-0.508479	-1.36187	0.0340657	0.332152	0.305486	1478	tags=19%, list=12%, signal=17%	WT1/DAB2IP/TBX20/KBTBD8/SMAD3/NODAL/HAND2/TCF15/BMP5/PKD2/TMEM100/FN1/SEMA7A/BNC2/SEMA3A/EXOC4/EDNRA/TGFBR2/SEMA3D/AKNA/GATA3/FGF8/CRB2/CDH2/SEMA3C/SFRP2/HPN/EFNA1/RGCC/PBLD/KITLG/COL1A1/CRELD1/HES1/HGF/FOXF1/NRP1/SOX9/LOXL3/WNT5A/MSX1/AMH
BP	GO:0000469	cleavage involved in rRNA processing	26	0.680155	1.52586	0.0345099	0.335637	0.30869	3282	tags=58%, list=26%, signal=43%	ERI2/NOP14/BMS1/NHP2/UTP20/RRS1/RRP36/KRI1/RPS21/ABT1/EXOSC9/NOL9/BOP1/NOP9/EXOSC8
BP	GO:0062208	positive regulation of pattern recognition receptor signaling pathway	26	-0.743153	-1.52038	0.0345258	0.335637	0.30869	872	tags=35%, list=7%, signal=32%	TIRAP/CYBA/DHX58/SLC46A2/LTF/TLR3/TLR5/CAV1/LBP
MF	GO:0004033	aldo-keto reductase (NADP) activity	17	-0.797711	-1.51487	0.0345595	0.335637	0.30869	761	tags=24%, list=6%, signal=22%	KCNAB1/RDH11/DHRS3/RDH8
BP	GO:0046660	female sex differentiation	95	-0.601054	-1.4549	0.034645	0.33594	0.308969	1898	tags=27%, list=15%, signal=23%	TYRO3/COL9A3/ADCYAP1/SRC/SIRT1/MERTK/WT1/SOD1/BAX/BRCA2/CYP19A1/RBP4/GNRH1/ARRB1/BMPR1B/INHBB/FZD4/GAS2/MMP14/KITLG/PGR/DMC1/LHFPL2/WNT5A/LHX1/AMH
BP	GO:1905037	autophagosome organization	78	0.524641	1.44402	0.0346817	0.33594	0.308969	1971	tags=24%, list=16%, signal=21%	RAB3GAP2/STX12/VMP1/ATG101/LRRK2/NSFL1C/SCFD1/SEC22B/MFN2/ATG2A/ATG13/TMEM39A/RAB1B/PIP4K2C/MAP1LC3C/RAB1A/ATG16L1/RAB7A/SH3GLB1
BP	GO:0048608	reproductive structure development	324	-0.484895	-1.33073	0.0347923	0.336245	0.30925	1967	tags=23%, list=15%, signal=20%	WNT2B/BMP7/ST14/EOMES/TYRO3/COL9A3/ANXA1/HOXA9/ADCYAP1/RSPO3/GHSR/SRC/GATA4/SPINT1/SIRT1/CRIP1/MERTK/KLHL10/WT1/GLI1/SOD1/BAX/NODAL/BMP5/PKD2/FRS2/EPAS1/BRCA2/CYP27B1/CYP19A1/EPOR/CDX4/RBP4/SEMA3A/PTN/GNRH1/TNFSF10/REN/HESX1/GATA2/BOK/IGF2/HSD17B4/GATA3/ARRB1/MAPK14/FGF8/ALOX15B/BMPR1B/INHBB/FZD4/SFRP2/PSAP/GAS2/TLR3/MMP14/NTRK1/CITED1/PLAG1/SYCP2/KITLG/PGR/HOXA13/HES1/NR0B1/DMC1/SOX9/WNT5A/LHX1/…
BP	GO:0045048	protein insertion into ER membrane	16	0.753008	1.5101	0.0348044	0.336245	0.30925	1694	tags=38%, list=13%, signal=33%	SGTA/TRAM1/EMC4/EMC9/EMC10/EMC2
MF	GO:0016830	carbon-carbon lyase activity	46	-0.69799	-1.54841	0.0351728	0.339226	0.311991	1190	tags=15%, list=9%, signal=14%	GAD1/GADL1/ALDOA/ME2/ACMSD/NPL/CSAD
BP	GO:0033006	regulation of mast cell activation involved in immune response	24	-0.77622	-1.55922	0.0352726	0.339226	0.311991	967	tags=38%, list=8%, signal=35%	HMOX1/RAC2/CD84/GATA2/LYN/PDPK1/PLA2G3/BLK/FOXF1
BP	GO:0060541	respiratory system development	168	-0.549242	-1.43383	0.0352934	0.339226	0.311991	1655	tags=27%, list=13%, signal=24%	YAP1/EIF4EBP1/NOG/SREBF1/TBX5/KRAS/FGF1/WNT2B/JMJD6/WDPCP/ADAMTS2/SOX11/WT1/GLI1/NODAL/SMPD3/SPDEF/EPAS1/CTSH/LOX/RBP4/PTN/CELSR1/HESX1/TGFBR2/PHEX/FGF8/KCNAB1/PPP1CA/SPARC/MMP14/PDGFA/PGR/LIPA/ERRFI1/HES1/FOXF1/CRISPLD2/ABCA12/SOX9/LOXL3/SFTPD/WNT5A/RC3H2/MAP2K1
BP	GO:0071428	rRNA-containing ribonucleoprotein complex export from nucleus	15	0.763559	1.50113	0.0353142	0.339226	0.311991	1737	tags=40%, list=14%, signal=35%	TSC1/EIF6/ABCE1/SDAD1/LTV1/RRS1
MF	GO:0008236	serine-type peptidase activity	102	-0.585352	-1.43727	0.0353607	0.339226	0.311991	1663	tags=35%, list=13%, signal=31%	MASP1/PRSS23/CTSA/TMPRSS5/FAP/TMPRSS13/F2/PROZ/PIK3IP1/CTSH/SCPEP1/PRCP/CTSC/CFB/PROC/F9/PLAU/CFI/HPN/LTF/HABP2/MST1/KLK15/DPP10/PRSS27/TMPRSS4/HGF/CPVL/PLG/ACE/ENDOU/TMPRSS15/HTRA3/MMP2/HTRA1/F11
MF	GO:0008408	3'-5' exonuclease activity	45	0.581466	1.4527	0.0353887	0.339226	0.311991	2569	tags=33%, list=20%, signal=27%	ERI2/RAD1/APLF/DIS3L/DIS3L2/RAD9A/REXO2/ANGEL2/CNOT1/ANGEL1/EXOSC5/MEIOB/EXD2/PNPT1/EXOSC9
BP	GO:0042572	retinol metabolic process	29	-0.747821	-1.54117	0.0355632	0.340448	0.313115	1027	tags=31%, list=8%, signal=29%	RBP4/LRAT/RDH16/RDH11/DGAT2/DHRS3/RDH8/CYP1A1/CYP3A4
BP	GO:0060033	anatomical structure regression	16	-0.808587	-1.5065	0.0356084	0.340448	0.313115	1561	tags=44%, list=12%, signal=38%	SLC17A6/SMAD5/GLI1/OPN4/SPI1/CD248/AMH
BP	GO:0030001	metal ion transport	358	0.374727	1.21894	0.0357958	0.341448	0.314035	1359	tags=13%, list=11%, signal=12%	SLC39A14/GCG/SLC30A5/RGS4/PMPCB/ANXA2/EGF/SLC39A10/P2RX2/MAGT1/GJA1/SLC39A7/ATP2B4/OPRM1/NPPA/EHD3/LGALS3/TRPC7/GPM6A/NMUR2/CXCL9/OPA1/SLC8B1/TRPM1/SEC61A1/TUSC3/ATP2A2/CNNM2/SPG7/SLC41A1/NOS1AP/THADA/TRPM7/TMCO1/TSPO/ASIC1/ARMC1/FGF14/PLPP4/CCR7/NMUR1/PPP3CA/SLC30A7/TMEM165/PHB2/RYR2/SLC24A4/FAM155A
MF	GO:0017069	snRNA binding	38	0.638997	1.54515	0.0358477	0.341448	0.314035	2058	tags=34%, list=16%, signal=29%	LSM10/PRPF8/RBM41/PRPF31/SF3B3/EFTUD2/HNRNPU/COIL/SNRPA/SNRPB2/NCBP2/LSM11/SNRNP70
BP	GO:0050819	negative regulation of coagulation	41	-0.68808	-1.51413	0.0358518	0.341448	0.314035	2363	tags=46%, list=19%, signal=38%	CPB2/SERPINF2/KNG1/SERPINE1/PRKCD/APOH/ADAMTS18/ANXA5/FAP/F2/GP1BA/PROC/PLAU/CD9/APOE/PDGFA/SERPING1/PLG/F11
BP	GO:0034446	substrate adhesion-dependent cell spreading	96	-0.594617	-1.4416	0.0360231	0.342637	0.315128	1279	tags=24%, list=10%, signal=22%	ABL1/TYRO3/KIF14/SRC/EPHB3/MERTK/FBLN1/RAC3/TACSTD2/FN1/MICALL2/USH2A/APOA1/FZD7/TRIOBP/PIK3R1/ANTXR1/VAMP3/FZD4/EFNA1/NRP1/CSPG5/POSTN
MF	GO:0000049	tRNA binding	52	0.549444	1.40733	0.0361047	0.342764	0.315245	2732	tags=33%, list=21%, signal=26%	TRMT10A/TRMU/NSUN2/MRPS27/FARSA/IARS2/NSUN6/EIF2A/TRMT1L/XPOT/AIMP1/SSB/NAT10/NEMF/ELP5/DTD2/YARS2
BP	GO:0048592	eye morphogenesis	120	-0.58421	-1.45143	0.0361592	0.342764	0.315245	2067	tags=25%, list=16%, signal=21%	OLFM3/KDM2B/IFT172/WNT2B/BMP7/USH1C/AHI1/SOX11/YY1/BAX/FRS2/DLL1/RBP4/PTN/PDE6C/IGFN1/CRB2/RORB/DSCAM/C12orf57/MYO7A/BCAR3/SDK1/GNGT1/SOX9/MFAP2/WNT5A/LHX1/VSX1/COL8A2
BP	GO:0006909	phagocytosis	212	-0.506684	-1.3461	0.0361757	0.342764	0.315245	2096	tags=25%, list=16%, signal=21%	PRKCD/PPARG/NCF4/ADORA2A/RAC2/ITGB1/ABL1/JMJD6/TYRO3/MYO10/ANXA1/MEGF10/SRC/ADORA1/ACTB/MERTK/SOD1/CSK/SYT7/WIPF1/AIF1/C4B/CRP/XKR5/RAB27A/CLN3/HCK/FCGR1A/GULP1/APOA1/GATA2/CD93/CYBA/PIK3R1/FPR2/ITGAM/GSN/ICAM5/WASF2/LYN/SIRPA/ARPC1B/MYO7A/CD302/P2RY6/IGLL1/ITGA2/MYH2/PLD4/SFTPD/AHSG/XKR9/LBP
BP	GO:0009152	purine ribonucleotide biosynthetic process	123	-0.576265	-1.43794	0.0364656	0.345068	0.317364	1139	tags=15%, list=9%, signal=13%	ADCY1/ADCY8/HACD2/ALDOA/CBR4/NPR1/FASN/AK1/APRT/AMPD1/GSTZ1/PPT1/ACLY/PID1/NME4/ACSL5/ACSS2/SCD5
BP	GO:0006757	ATP generation from ADP	97	0.48423	1.37902	0.0365435	0.345362	0.317635	911	tags=18%, list=7%, signal=16%	INS/JMJD8/NUP205/NUP35/EIF6/AK9/ARNT/PRKAG2/SEC13/OGDH/NUP210/NUP188/NUP107/TPR/ALDOC/GALK1/NUP98
BP	GO:0032386	regulation of intracellular transport	285	0.384655	1.22957	0.0366177	0.345621	0.317873	949	tags=13%, list=7%, signal=12%	DERL2/CABP1/DYNC1H1/IL1B/ANXA2/SEC16A/HAX1/PREB/YIPF5/SEC16B/UHMK1/XPO4/REEP2/PGAP1/SAE1/UFM1/PTPN23/LRRK2/SCFD1/FBXW7/USP7/EDEM1/DHX9/MAP2K2/KIF20B/LMAN1/TPR/TM9SF4/RBM4/APOD/ERLEC1/DNAJC13/NUS1/IPO5/NSUN2/SH3TC2/CEP131
BP	GO:1903203	regulation of oxidative stress-induced neuron death	17	0.714875	1.45177	0.0366648	0.345623	0.317875	1025	tags=24%, list=8%, signal=22%	IL10/TSC1/FBXW7/NR4A3
BP	GO:0022407	regulation of cell-cell adhesion	291	-0.480738	-1.3116	0.0368098	0.346531	0.31871	1164	tags=17%, list=9%, signal=16%	RUNX3/MALT1/F11R/GRAP2/CRTAM/GNRH1/APOA1/ZC3H12A/HLA-DPB1/TGFBR2/AKNA/IGF2/CD9/PIK3R1/GATA3/MAPK14/CXCL12/NRARP/ETS1/PIK3R6/SWAP70/BCL10/TNFSF13B/LYN/SIRPA/BCL6/TMIGD2/DUSP10/PDPK1/TESPA1/BLK/RGCC/NDFIP1/CD209/HLA-DPA1/HES1/PLG/ST3GAL4/CD276/CAV1/LOXL3/SOX4/SFTPD/WNT5A/EPO/CCL25/RC3H2/FGL1/PRKCZ
BP	GO:0070997	neuron death	286	-0.485082	-1.32132	0.036855	0.346531	0.31871	2055	tags=22%, list=16%, signal=19%	ADORA2A/KDM2B/F2R/KRAS/ABL1/TYRO3/TMTC4/GABRA5/KIF14/TNFRSF1B/C5AR1/ADORA1/SIRT1/TERT/PTK2B/GRIK5/GRIK2/CDK5/RAPSN/SOD1/BAX/PARK7/JUN/AGAP2/GRIN2B/EN1/CDC34/DHCR24/NFATC4/CLN3/C1QA/BOK/SIGMAR1/DDIT4/GATA3/ARRB1/ITGAM/CD200/GAPDH/FGF8/NENF/TRAF2/CD200R1/PM20D1/ANGPT1/PDPK1/PLA2G3/CHP1/RRAS2/TOX3/NDNF/PPT1/APOE/NTRK1/CITED1/PTPRZ1/LGMN/NTF3/ATN1/WNT5A/EPO/BACE1/CSF1/EGLN3
BP	GO:0060628	regulation of ER to Golgi vesicle-mediated transport	14	0.795936	1.54708	0.0369707	0.346917	0.319065	584	tags=36%, list=5%, signal=34%	PREB/YIPF5/PGAP1/LRRK2/SCFD1
BP	GO:0006536	glutamate metabolic process	29	-0.742324	-1.52984	0.0370347	0.346917	0.319065	1389	tags=34%, list=11%, signal=31%	TAT/ALDH4A1/GAD1/GOT2/GGT1/HAL/AMDHD1/PRODH/UROC1/NAGS
BP	GO:0030323	respiratory tube development	149	-0.547581	-1.40737	0.037037	0.346917	0.319065	2177	tags=29%, list=17%, signal=24%	DAG1/YAP1/EIF4EBP1/NOG/SREBF1/TBX5/KRAS/FGF1/WNT2B/JMJD6/HECA/ADAMTS2/SOX11/GLI1/NODAL/SMPD3/SPDEF/EPAS1/CTSH/LOX/RBP4/PTN/CELSR1/TGFBR2/PHEX/FGF8/PPP1CA/SPARC/MMP14/PDGFA/PGR/LIPA/ERRFI1/HES1/FOXF1/CRISPLD2/ABCA12/SOX9/LOXL3/SFTPD/WNT5A/RC3H2/MAP2K1
BP	GO:0006891	intra-Golgi vesicle-mediated transport	29	0.643421	1.49083	0.0371133	0.347093	0.319227	1869	tags=48%, list=15%, signal=41%	COPZ2/COPG2/RAB6A/COG1/COPA/COPE/GOLGA3/COPZ1/NSF/NAPG/COPB1/COPB2/GOSR1/GOSR2
MF	GO:0043022	ribosome binding	46	0.585593	1.46503	0.0371869	0.347093	0.319227	1379	tags=30%, list=11%, signal=27%	GCN1/EIF6/HSPA5/SEC61A1/SRP19/SRP72/TACO1/RPN2/C1QBP/EIF3C/SPCS1/MRPS27/CPEB2/EIF2A
BP	GO:0060326	cell chemotaxis	206	-0.528743	-1.40491	0.037197	0.347093	0.319227	2246	tags=28%, list=18%, signal=23%	DAPK2/DOCK4/PREX1/CNR2/PLA2G1B/ACKR4/TNFSF11/IL17RC/TMSB4X/MOSPD2/PIK3CG/CCL20/SERPINE1/PRKCD/ACKR3/RAC2/FGF1/HSD3B7/ANXA1/C5AR1/CXCR4/ADAM10/PTK2B/CSF3R/HBEGF/CSF1R/AIF1/TIRAP/CXADR/TRPM2/DPEP1/LOX/PTN/CKLF/VEGFC/AKIRIN1/FPR2/CXCL12/CCR9/SWAP70/CXCL10/CMKLR1/LYN/PGF/MST1/HGF/LGMN/NRP1/S100A14/SFTPD/WNT5A/CXCL14/MSMP/CCL25/CSF1/CCR6/LBP
BP	GO:0070252	actin-mediated cell contraction	95	-0.598065	-1.44767	0.0372597	0.34724	0.319362	2004	tags=40%, list=16%, signal=34%	KCNE4/DSG2/TNNC1/KCNJ2/EPDR1/MYH7/MYH6/TNNI1/ADORA1/GATA4/MYL2/MYL1/TNNT1/DSP/MYL4/TNNT2/CACNA1D/BIN1/TPM3/EMP2/TTN/SHTN1/GJA5/FGF13/GSN/ACTN2/NEDD4L/TNNC2/MYH3/TMOD1/ATP1A2/MYBPC1/MYBPC2/TNNT3/CAV1/MYH2/ATP2A1/TNNI2
MF	GO:0048038	quinone binding	14	-0.824925	-1.50267	0.0373905	0.347344	0.319457	884	tags=43%, list=7%, signal=40%	COQ10B/HSD17B8/AOC3/CBR4/TP53I3/AOC1
BP	GO:0098780	response to mitochondrial depolarisation	17	0.71391	1.44981	0.0374018	0.347344	0.319457	2434	tags=41%, list=19%, signal=33%	VPS13C/CDC37/MFN2/ATG13/HK2/HUWE1/TOMM7
BP	GO:0090646	mitochondrial tRNA processing	12	0.794643	1.48227	0.037412	0.347344	0.319457	393	tags=17%, list=3%, signal=16%	TRMT10A/MTO1
BP	GO:0000460	maturation of 5.8S rRNA	33	0.652447	1.52677	0.0375021	0.347742	0.319824	3282	tags=52%, list=26%, signal=38%	EIF6/ERI2/NOP14/UTP20/PRKDC/RRS1/KRI1/MPHOSPH6/RPS21/FTSJ3/ABT1/EXOSC9/WDR12/NOL9/BOP1/NOP9/EXOSC8
BP	GO:0021700	developmental maturation	204	-0.519908	-1.37964	0.038217	0.353926	0.325512	1847	tags=21%, list=15%, signal=18%	KIF14/GPAT4/PHOSPHO1/NPR2/CDC20/LYL1/PTK2B/MAEA/DAB2IP/ZDHHC2/PTH1R/PALM/RAC3/BTK/EPAS1/CCNB1/BRCA2/NFATC4/WNT10B/GLDN/REN/BLOC1S3/GATA2/C1QA/RAB32/GATA3/ADGRB3/B4GALT5/ANKRD27/LTF/PLA2G3/PGR/SNX19/HES1/DMC1/SYT4/WNT5A/EPO/SNX10/MMP2/VSX1/CCR6
BP	GO:0032204	regulation of telomere maintenance	69	0.517542	1.3951	0.0384127	0.355293	0.326769	2613	tags=38%, list=21%, signal=30%	XRN1/CCT3/CCT6A/USP7/CCT4/PRKCQ/TEN1/HNRNPD/CCT8/ATR/SMG1/UPF1/HNRNPU/CCT7/CCT5/TERF2IP/YLPM1/HNRNPA1/PNKP/ERCC4/TNKS/NAT10/NEK7/PINX1/TCP1/DHX36
BP	GO:0140056	organelle localization by membrane tethering	158	0.430093	1.30145	0.0385268	0.355903	0.327329	1400	tags=20%, list=11%, signal=18%	MAPRE1/DYNC1H1/CFTR/HSP90AA1/STX12/TUBB4B/CEP192/SCFD2/TUBA1A/SCFD1/CEP164/CPLX2/AKAP9/TUBA4A/NPHP4/ESYT2/DCTN1/NPHP1/IQCB1/UNC13A/PLK4/CEP131/CEP250/ODF2/PPP2R1A/RABEPK/CEP152/CEP76/NSF/CDK5RAP2/USO1
BP	GO:0000027	ribosomal large subunit assembly	23	0.715173	1.57026	0.038618	0.356299	0.327694	2089	tags=30%, list=16%, signal=25%	MDN1/RPL5/RPF2/DHX30/RRS1/PPAN/RPL10
CC	GO:0071013	catalytic step 2 spliceosome	78	0.520702	1.43318	0.0387619	0.356842	0.328193	2056	tags=24%, list=16%, signal=21%	WDR83/PRPF8/SNRNP200/SNRPN/EIF4A3/HNRNPH1/SF3B3/PPIL3/SF3B2/EFTUD2/PPIL1/HNRNPU/PRPF19/SNRPG/SF3B1/SNRPB2/HNRNPA1/AQR/SNRPF
BP	GO:0035988	chondrocyte proliferation	16	-0.796944	-1.48481	0.0387735	0.356842	0.328193	718	tags=31%, list=6%, signal=30%	SMAD7/BMPR1B/LTF/MMP14/SOX9
BP	GO:0030048	actin filament-based movement	121	-0.573412	-1.43009	0.0391061	0.359169	0.330333	2117	tags=36%, list=17%, signal=31%	TPM4/MYO1E/MYO1H/KCNE4/DSG2/TNNC1/KCNJ2/EPDR1/MYH7/MYH6/TNNI1/ADORA1/GATA4/MYL2/MYL1/TNNT1/DSP/WIPF1/MYL4/TNNT2/CACNA1D/BIN1/TPM3/EMP2/TTN/SHTN1/GJA5/FGF13/GSN/WASF2/ACTN2/NEDD4L/MYO7A/TNNC2/MYH3/TMOD1/ATP1A2/MYBPC1/MYBPC2/TNNT3/CAV1/MYH2/ATP2A1/TNNI2
BP	GO:0010591	regulation of lamellipodium assembly	36	-0.709413	-1.52407	0.0391236	0.359169	0.330333	856	tags=19%, list=7%, signal=18%	AKIRIN1/PIK3R1/FSCN1/WASF2/OCLN/AVIL/TWF2
BP	GO:0042402	cellular biogenic amine catabolic process	24	-0.764439	-1.53555	0.0392751	0.360112	0.3312	1129	tags=33%, list=9%, signal=30%	IDO2/COMT/CHDH/SAT1/HAAO/ACMSD/LRTOMT/BHMT
BP	GO:0071695	anatomical structure maturation	156	-0.539344	-1.39742	0.0393487	0.360339	0.331409	1300	tags=16%, list=10%, signal=15%	PTH1R/RAC3/BTK/EPAS1/CCNB1/BRCA2/WNT10B/GLDN/REN/GATA2/C1QA/GATA3/ADGRB3/B4GALT5/LTF/PLA2G3/PGR/HES1/DMC1/WNT5A/EPO/SNX10/MMP2/VSX1/CCR6
BP	GO:0035195	gene silencing by miRNA	108	0.479413	1.36917	0.0394373	0.360703	0.331744	911	tags=17%, list=7%, signal=16%	NUP205/AGO1/NUP35/EIF6/DICER1/SEC13/NUP210/EIF4G1/NUP188/DDX6/DHX9/MAP2K2/NUP107/TPR/ESR1/ELAVL1/RBM4/NUP98
BP	GO:0035372	protein localization to microtubule	15	0.756914	1.48807	0.0395098	0.360919	0.331942	680	tags=20%, list=5%, signal=19%	MAPRE1/KIF20B/MAPRE2
BP	GO:0043486	histone exchange	32	0.63513	1.48593	0.0396957	0.361517	0.332493	1504	tags=25%, list=12%, signal=22%	CENPO/CHD5/ZNHIT1/ANP32E/CENPP/RSF1/RBBP4/PSME4
BP	GO:0048839	inner ear development	151	-0.540447	-1.39169	0.039726	0.361517	0.332493	2005	tags=29%, list=16%, signal=25%	PLS1/SLC44A4/TBX1/GABRA5/MCOLN3/COL2A1/MAFB/USH1C/IFT88/AHI1/ADAM10/WDPCP/SOBP/SOD1/MYCL/DLL1/PLPPR4/SLC9A3R1/USH2A/ADGRV1/ATP8B1/HESX1/GATA2/TRIOBP/GATA3/PRRX1/LGR5/FGF8/FZD2/SPARC/FOXI1/OTOL1/HPN/LIN7A/MYO7A/EPHA4/HOXA13/HES1/COL11A1/LRTOMT/SOX9/WNT5A/CXCL14/CTHRC1
MF	GO:0016779	nucleotidyltransferase activity	99	0.483972	1.37066	0.0397786	0.361517	0.332493	2252	tags=21%, list=18%, signal=18%	TEP1/UAP1/FLAD1/GMPPA/TAMM41/REV3L/NUDT5/GMPPB/PTGES3/GPHN/CRCP/PAPSS1/FICD/CDS1/RPAP1/POLR2D/POLR1C/POLR1A/NANS/CHRAC1/POLH
BP	GO:0043300	regulation of leukocyte degranulation	32	-0.724968	-1.51847	0.0398724	0.361517	0.332493	967	tags=38%, list=8%, signal=35%	FES/PRAM1/HMOX1/RAC2/CD84/GATA2/ITGAM/LYN/PDPK1/PLA2G3/BLK/FOXF1
BP	GO:0051931	regulation of sensory perception	26	0.67291	1.50961	0.0399119	0.361517	0.332493	437	tags=15%, list=3%, signal=15%	IL10/VIP/OPRM1/NMUR2
BP	GO:1902106	negative regulation of leukocyte differentiation	64	-0.646224	-1.48254	0.039925	0.361517	0.332493	1855	tags=39%, list=15%, signal=34%	SHH/CBFB/TRIB1/CARTPT/SMAD7/MAFB/ANXA1/CDK6/HLX/RUNX3/C1QC/GPR68/GPR137B/GATA2/ZC3H12A/PIK3R1/TMEM176B/NRARP/LRRC17/LYN/BCL6/LTF/TLR3/LOXL3/RC3H2
BP	GO:0010257	NADH dehydrogenase complex assembly	51	0.564901	1.44567	0.0399961	0.361517	0.332493	3344	tags=35%, list=26%, signal=26%	FOXRED1/NDUFV2/NDUFV1/BCS1L/NDUFAF1/NDUFAF4/NDUFA5/NDUFA13/NDUFB2/NDUFA10/NDUFAF5/NDUFAB1/NDUFA12/NDUFB6/NDUFA11/NDUFS2/ACAD9/NDUFS1
BP	GO:0032981	mitochondrial respiratory chain complex I assembly	51	0.564901	1.44567	0.0399961	0.361517	0.332493	3344	tags=35%, list=26%, signal=26%	FOXRED1/NDUFV2/NDUFV1/BCS1L/NDUFAF1/NDUFAF4/NDUFA5/NDUFA13/NDUFB2/NDUFA10/NDUFAF5/NDUFAB1/NDUFA12/NDUFB6/NDUFA11/NDUFS2/ACAD9/NDUFS1
BP	GO:0015865	purine nucleotide transport	16	0.748175	1.50041	0.040023	0.361517	0.332493	1078	tags=38%, list=8%, signal=34%	GJA1/SLC33A1/ABCC4/ABCD1/CR1/SLC25A24
BP	GO:0070129	regulation of mitochondrial translation	23	0.713762	1.56716	0.0401176	0.361517	0.332493	1091	tags=22%, list=9%, signal=20%	LRPPRC/COA3/TACO1/C1QBP/MRPS27
MF	GO:0009931	calcium-dependent protein serine/threonine kinase activity	21	-0.778848	-1.53079	0.0402404	0.361517	0.332493	175	tags=19%, list=1%, signal=19%	PKN1/MKNK2/MAPKAPK3/PRKCZ
BP	GO:0007159	leukocyte cell-cell adhesion	232	-0.496355	-1.33214	0.0402516	0.361517	0.332493	1164	tags=18%, list=9%, signal=17%	RUNX3/MALT1/F11R/GRAP2/CRTAM/GNRH1/ZC3H12A/HLA-DPB1/TGFBR2/IGF2/PIK3R1/GATA3/SELL/CXCL12/NRARP/ETS1/PIK3R6/BCL10/TNFSF13B/LYN/SIRPA/BCL6/TMIGD2/DUSP10/PDPK1/TESPA1/EZR/NDFIP1/CD209/HLA-DPA1/HES1/ST3GAL4/CD276/CAV1/LOXL3/SOX4/SFTPD/EPO/CCL25/RC3H2/FGL1/PRKCZ
BP	GO:0030195	negative regulation of blood coagulation	40	-0.685787	-1.50499	0.0403101	0.361517	0.332493	2363	tags=45%, list=19%, signal=37%	CPB2/SERPINF2/KNG1/SERPINE1/PRKCD/APOH/ADAMTS18/FAP/F2/GP1BA/PROC/PLAU/CD9/APOE/PDGFA/SERPING1/PLG/F11
BP	GO:1900047	negative regulation of hemostasis	40	-0.685787	-1.50499	0.0403101	0.361517	0.332493	2363	tags=45%, list=19%, signal=37%	CPB2/SERPINF2/KNG1/SERPINE1/PRKCD/APOH/ADAMTS18/FAP/F2/GP1BA/PROC/PLAU/CD9/APOE/PDGFA/SERPING1/PLG/F11
BP	GO:2000401	regulation of lymphocyte migration	40	-0.687602	-1.50897	0.0403101	0.361517	0.332493	783	tags=30%, list=6%, signal=28%	ADAM10/PTK2B/JAM2/AIF1/CXCL12/CD200/CXCL10/CD200R1/WNT5A/CXCL14/ECM1/CCR6
BP	GO:0045667	regulation of osteoblast differentiation	95	-0.586558	-1.41981	0.0405797	0.363024	0.333879	2437	tags=39%, list=19%, signal=32%	IGFBP5/NPNT/SUFU/TOB1/SNAI2/YAP1/NOG/ATRAID/PPARG/BMP7/NOCT/GNAS/ZHX3/SOX11/CDK6/SMAD5/HOXA2/SMAD1/GLI1/SMAD3/HAND2/SMAD6/WNT10B/VEGFC/HEMGN/BMPR1B/RORB/TMEM119/SFRP2/LTF/RASSF2/CITED1/GDF10/HGF/SMOC1/SOX9/CTHRC1
BP	GO:0043523	regulation of neuron apoptotic process	162	-0.530685	-1.37512	0.0407056	0.363024	0.333879	2105	tags=27%, list=17%, signal=23%	HMOX1/ADORA2A/KDM2B/F2R/KRAS/TYRO3/GABRA5/KIF14/C5AR1/TERT/PTK2B/GRIK5/GRIK2/CDK5/RAPSN/SOD1/BAX/PARK7/JUN/AGAP2/EN1/CDC34/NFATC4/CLN3/BOK/SIGMAR1/GATA3/ARRB1/ITGAM/FGF8/ANGPT1/PDPK1/PLA2G3/TOX3/NDNF/PPT1/APOE/NTRK1/CITED1/PTPRZ1/LGMN/NTF3/BACE1/EGLN3
BP	GO:0003151	outflow tract morphogenesis	63	-0.648245	-1.48983	0.040724	0.363024	0.333879	2750	tags=38%, list=22%, signal=30%	GATA6/ROBO1/SIX1/CRKL/CLDN5/RARB/NOG/BMP7/TBX1/SOX11/TBX20/HAND2/SMAD6/TGFBR2/GJA5/ELN/FGF8/FZD2/SEMA3C/SFRP2/HES1/NRP1/DHRS3/WNT5A
CC	GO:0031594	neuromuscular junction	63	-0.648557	-1.49055	0.040724	0.363024	0.333879	1488	tags=16%, list=12%, signal=14%	PPP1R9A/CDK5/RAPSN/SLC8A3/PTN/DLGAP3/STX1B/EPHA4/MUSK/POSTN
BP	GO:0071466	cellular response to xenobiotic stimulus	62	-0.645773	-1.48115	0.040724	0.363024	0.333879	1136	tags=37%, list=9%, signal=34%	NAT1/SULT1A1/FMO2/CYP2A13/GUK1/BPHL/E2F1/DPEP1/CYB5R3/CYP2U1/GGT1/RORA/CES2/CYP46A1/GSTA4/NR1I2/CYP2R1/PON3/CMBL/CYP2J2/CYP1A1/CYP3A4/AOC1
BP	GO:0045581	negative regulation of T cell differentiation	29	-0.734434	-1.51358	0.040783	0.363112	0.333959	2505	tags=38%, list=20%, signal=31%	SHH/CBFB/SMAD7/ANXA1/HLX/RUNX3/ZC3H12A/NRARP/BCL6/LOXL3/RC3H2
BP	GO:0071786	endoplasmic reticulum tubular network organization	15	0.749687	1.47386	0.0409084	0.363789	0.334582	723	tags=27%, list=6%, signal=25%	REEP2/REEP3/RAB3GAP2/RAB18
BP	GO:0061045	negative regulation of wound healing	59	-0.655899	-1.49365	0.0410334	0.364462	0.335201	1434	tags=27%, list=11%, signal=24%	SMAD3/FAP/F2/EPPK1/GP1BA/PROC/PLAU/CD9/APOE/PDGFA/SERPING1/PLG/WFDC1/MYOZ1/CLDN3/F11
MF	GO:0140101	catalytic activity, acting on a tRNA	92	0.487221	1.38095	0.0412469	0.365917	0.33654	3275	tags=37%, list=26%, signal=28%	TRMT10A/METTL2A/TYW1/NSUN2/PTRH2/LRRC47/LARS2/FARSA/IARS2/NSUN6/TRMT1L/TRMT61A/METTL6/WARS2/POP1/DTWD2/RPP38/TRPT1/CARS2/DTD2/FARSB/YARS2/TRMT5/FTO/THUMPD2/TRMT61B/DALRD3/TYW3/RPP14/TRMT10C/ELAC2/PUS10/EARS2/TRMT1
BP	GO:0016571	histone methylation	110	0.474194	1.35935	0.0413862	0.366713	0.337272	1848	tags=22%, list=15%, signal=19%	GCG/MTHFR/CHD5/KMT2A/SETD1A/PRDM16/SETD6/RIF1/PRMT1/FBL/PRMT7/SETDB2/PAXBP1/SETD1B/SIRT7/SETD5/CARM1/KMT2B/PRMT2/PRDM5/KMT2E/PWP1/SMYD1/ASH1L
BP	GO:0010464	regulation of mesenchymal cell proliferation	25	-0.7443	-1.50525	0.0415005	0.367284	0.337797	998	tags=28%, list=8%, signal=26%	PTN/TGFBR2/PRRX1/PDGFA/FOXF1/SOX9/WNT5A
BP	GO:0051402	neuron apoptotic process	193	-0.513621	-1.35311	0.0417755	0.369275	0.339628	2105	tags=24%, list=17%, signal=21%	HMOX1/ADORA2A/KDM2B/F2R/KRAS/TYRO3/TMTC4/GABRA5/KIF14/C5AR1/TERT/PTK2B/GRIK5/GRIK2/CDK5/RAPSN/SOD1/BAX/PARK7/JUN/AGAP2/EN1/CDC34/NFATC4/CLN3/BOK/SIGMAR1/GATA3/ARRB1/ITGAM/GAPDH/FGF8/ANGPT1/PDPK1/PLA2G3/TOX3/NDNF/PPT1/APOE/NTRK1/CITED1/PTPRZ1/LGMN/NTF3/ATN1/BACE1/EGLN3
BP	GO:2000059	negative regulation of ubiquitin-dependent protein catabolic process	41	0.589966	1.44869	0.0418645	0.369372	0.339717	2051	tags=27%, list=16%, signal=23%	SGTA/RPL5/USP7/KLHL40/USP14/BAG5/N4BP1/UBXN1/CAMLG/DDRGK1/QRICH2
BP	GO:0002320	lymphoid progenitor cell differentiation	20	-0.759071	-1.48578	0.0419863	0.369372	0.339717	1256	tags=30%, list=10%, signal=27%	FLCN/GATA3/SPI1/HES1/FLT3/SOX4
BP	GO:0042339	keratan sulfate metabolic process	25	-0.739645	-1.49584	0.0419975	0.369372	0.339717	1868	tags=40%, list=15%, signal=34%	B4GALT3/CHST6/B4GALT1/HEXB/GNS/B4GALT5/PRELP/ST3GAL4/GLB1/LUM
BP	GO:0071295	cellular response to vitamin	25	-0.743002	-1.50263	0.0419975	0.369372	0.339717	1132	tags=24%, list=9%, signal=22%	CYP27B1/PTN/PHEX/COL1A1/BGLAP/POSTN
BP	GO:0062125	regulation of mitochondrial gene expression	25	0.680585	1.52283	0.0420366	0.369372	0.339717	1091	tags=20%, list=9%, signal=18%	LRPPRC/COA3/TACO1/C1QBP/MRPS27
BP	GO:0035459	vesicle cargo loading	16	0.742762	1.48955	0.0421111	0.369586	0.339914	1750	tags=50%, list=14%, signal=43%	SEC24D/TMED10/SEC13/SEC31A/TMED2/SEC23B/RAB1A/SEC24A
BP	GO:0034982	mitochondrial protein processing	12	0.78714	1.46827	0.0423069	0.370864	0.341089	1772	tags=50%, list=14%, signal=43%	PMPCB/LRRK2/SPG7/MIPEP/PMPCA/IMMP1L
BP	GO:0046718	viral entry into host cell	92	-0.582425	-1.40088	0.0425844	0.372854	0.342919	2006	tags=22%, list=16%, signal=18%	ITGB1/TNFRSF14/EPS15/TRIM11/TYRO3/CXCR4/TRIM8/SLC1A5/CXADR/F11R/ANPEP/GSN/IFITM3/TMPRSS4/CD209/CAV2/NRP1/ITGA2/CAV1/SLC10A1
BP	GO:1903037	regulation of leukocyte cell-cell adhesion	206	-0.504658	-1.34091	0.0427461	0.373826	0.343814	1164	tags=19%, list=9%, signal=17%	RUNX3/MALT1/GRAP2/CRTAM/GNRH1/ZC3H12A/HLA-DPB1/TGFBR2/IGF2/PIK3R1/GATA3/CXCL12/NRARP/ETS1/PIK3R6/BCL10/TNFSF13B/LYN/SIRPA/BCL6/TMIGD2/DUSP10/PDPK1/TESPA1/NDFIP1/CD209/HLA-DPA1/HES1/ST3GAL4/CD276/CAV1/LOXL3/SOX4/SFTPD/EPO/CCL25/RC3H2/FGL1/PRKCZ
BP	GO:0008334	histone mRNA metabolic process	20	0.717543	1.52665	0.0427968	0.373827	0.343814	2226	tags=40%, list=18%, signal=33%	XRN1/LSM10/UPF1/SNRPG/NCBP2/LSM11/SNRPF/SSB
BP	GO:1903202	negative regulation of oxidative stress-induced cell death	34	0.610623	1.43294	0.0428981	0.374054	0.344023	1426	tags=26%, list=11%, signal=24%	INS/IL10/TSC1/LRRK2/TRAP1/BAG5/NR4A3/PYCR1/GPR37L1
BP	GO:0043484	regulation of RNA splicing	114	0.463908	1.33675	0.0429242	0.374054	0.344023	1728	tags=20%, list=14%, signal=18%	KHDRBS3/AFF2/PTBP2/HABP4/MBNL2/YTHDC1/RBM4/NOVA1/RBM15/C1QBP/NUP98/HNRNPH1/GRSF1/PUF60/ERN1/NCL/RBM12B/FASTK/TIA1/SRSF4/HNRNPU/PRPF19/RPS13
BP	GO:0002053	positive regulation of mesenchymal cell proliferation	20	-0.757307	-1.48233	0.0429919	0.374202	0.34416	894	tags=30%, list=7%, signal=28%	TGFBR2/PRRX1/PDGFA/FOXF1/SOX9/WNT5A
MF	GO:0015035	protein disulfide oxidoreductase activity	19	0.701582	1.46701	0.043117	0.374849	0.344754	2171	tags=37%, list=17%, signal=31%	ERO1B/DNAJC10/GFER/TXN2/ERO1A/TXN/GRXCR1
BP	GO:0002063	chondrocyte development	23	-0.735112	-1.4648	0.0432612	0.375548	0.345398	1773	tags=48%, list=14%, signal=41%	MATN1/PTHLH/SMPD3/EIF2AK3/TGFBR2/BMPR1B/SFRP2/SERPINH1/COL11A1/SOX9/ECM1
BP	GO:0030514	negative regulation of BMP signaling pathway	40	-0.681333	-1.49521	0.0434109	0.375548	0.345398	697	tags=15%, list=5%, signal=14%	VWC2L/SFRP2/WNT5A/SOSTDC1/HTRA3/HTRA1
BP	GO:0034123	positive regulation of toll-like receptor signaling pathway	20	-0.75134	-1.47065	0.0434783	0.375548	0.345398	872	tags=35%, list=7%, signal=33%	TIRAP/CYBA/LTF/TLR3/TLR5/CAV1/LBP
BP	GO:0042759	long-chain fatty acid biosynthetic process	20	-0.751601	-1.47116	0.0434783	0.375548	0.345398	758	tags=25%, list=6%, signal=24%	GPX4/ALOX15B/ASAH2/CYP1A1/CYP3A4
BP	GO:0046470	phosphatidylcholine metabolic process	65	-0.632885	-1.45816	0.0434783	0.375548	0.345398	2662	tags=31%, list=21%, signal=24%	PCTP/LIPC/RAB38/STARD10/PNPLA8/MBOAT2/PLA2G1B/SLC44A4/GPAT4/PHOSPHO1/LPIN1/APOA4/PLA2G4A/APOA1/PLA2G3/LPCAT2/LCAT/PLA2G15/LPCAT4/GDPD3
BP	GO:0001676	long-chain fatty acid metabolic process	70	-0.624307	-1.45531	0.0436747	0.375548	0.345398	1683	tags=26%, list=13%, signal=22%	GPX4/CYP2A13/SLC27A2/PLA2G4A/ACOT8/SLC27A6/PTGES/FAAH2/CYP2U1/HSD17B4/ALOX15B/ASAH2/TBXAS1/CYP2J2/CYP1A1/ACSL5/CYP3A4/FADS2
BP	GO:0048873	homeostasis of number of cells within a tissue	21	-0.767403	-1.5083	0.0436966	0.375548	0.345398	2098	tags=52%, list=17%, signal=44%	SASH3/F2R/KRAS/ILDR2/KLHL10/BAX/RAC3/GATA2/LIPA/SOX9/CSF1
BP	GO:1904816	positive regulation of protein localization to chromosome, telomeric region	12	0.785437	1.46509	0.0437055	0.375548	0.345398	1721	tags=50%, list=14%, signal=43%	CCT3/CCT6A/CCT4/CCT8/CCT7/CCT5
BP	GO:0019731	antibacterial humoral response	15	-0.798939	-1.46582	0.0437063	0.375548	0.345398	589	tags=40%, list=5%, signal=38%	DMBT1/PLA2G1B/CTSG/LTF/OCIAD2/SFTPD
BP	GO:0034638	phosphatidylcholine catabolic process	12	-0.825408	-1.47681	0.0437063	0.375548	0.345398	144	tags=25%, list=1%, signal=25%	PLA2G4A/PLA2G15/GDPD3
MF	GO:0017171	serine hydrolase activity	104	-0.576505	-1.41457	0.0438472	0.376228	0.346023	1663	tags=35%, list=13%, signal=30%	MASP1/PRSS23/CTSA/TMPRSS5/FAP/TMPRSS13/F2/PROZ/PIK3IP1/CTSH/SCPEP1/PRCP/CTSC/CFB/PROC/F9/PLAU/CFI/HPN/LTF/HABP2/MST1/KLK15/DPP10/PRSS27/TMPRSS4/HGF/CPVL/PLG/ACE/ENDOU/TMPRSS15/HTRA3/MMP2/HTRA1/F11
BP	GO:0010592	positive regulation of lamellipodium assembly	27	-0.730836	-1.50091	0.0439024	0.376228	0.346023	856	tags=26%, list=7%, signal=24%	AKIRIN1/PIK3R1/FSCN1/WASF2/OCLN/AVIL/TWF2
BP	GO:0031647	regulation of protein stability	243	0.393589	1.23379	0.0439383	0.376228	0.346023	1762	tags=20%, list=14%, signal=18%	HSPD1/P3H1/ZSWIM7/SEL1L/DERL1/SEC16A/SYVN1/HSP90AA1/DPM3/TSC1/CALR/APTX/CCNH/RPL5/STX12/CCT3/LRRK2/CCT6A/FBXW7/USP7/CCT4/DDI2/DDOST/PTGES3/CDC37/BAG5/CCT8/WIZ/MDM4/FKBPL/PHB2/USP4/DAD1/RAD23A/RAB21/NCLN/NAPG/FLNA/STK4/COG7/CCT7/HCFC1/MDM2/MTMR9/BMP2/CCT5/TELO2/PRKDC/GNAQ
BP	GO:0006558	L-phenylalanine metabolic process	10	-0.837947	-1.46259	0.0441696	0.376462	0.346238	1549	tags=80%, list=12%, signal=70%	HGD/PAH/TAT/PCBD1/ASRGL1/GSTZ1/IL4I1/QDPR
BP	GO:0006559	L-phenylalanine catabolic process	10	-0.837947	-1.46259	0.0441696	0.376462	0.346238	1549	tags=80%, list=12%, signal=70%	HGD/PAH/TAT/PCBD1/ASRGL1/GSTZ1/IL4I1/QDPR
BP	GO:1902221	erythrose 4-phosphate/phosphoenolpyruvate family amino acid metabolic process	10	-0.837947	-1.46259	0.0441696	0.376462	0.346238	1549	tags=80%, list=12%, signal=70%	HGD/PAH/TAT/PCBD1/ASRGL1/GSTZ1/IL4I1/QDPR
BP	GO:1902222	erythrose 4-phosphate/phosphoenolpyruvate family amino acid catabolic process	10	-0.837947	-1.46259	0.0441696	0.376462	0.346238	1549	tags=80%, list=12%, signal=70%	HGD/PAH/TAT/PCBD1/ASRGL1/GSTZ1/IL4I1/QDPR
BP	GO:0001819	positive regulation of cytokine production	286	-0.477886	-1.30172	0.044226	0.376508	0.34628	1466	tags=17%, list=12%, signal=16%	SOD1/POU2F2/SMAD3/CARD9/NODAL/PARK7/CSF1R/POLR3K/AIF1/TIRAP/C1QTNF3/SEMA7A/NFATC4/AGT/MALT1/PLCB1/CRTAM/IL17RA/EIF2AK3/HLA-DPB1/CYBA/MAVS/DHX58/LTA/PIK3R1/GATA3/RORA/MAPK14/CD200/GAPDH/ALOX15B/TRAF2/BCL10/SCAMP5/TMIGD2/PLA2G3/RGCC/TLR3/TLR5/CD58/HLA-DPA1/HGF/CD276/CHIA/WNT5A/PANX2/PRKCZ/LUM/LBP/POSTN
BP	GO:0019730	antimicrobial humoral response	47	-0.672876	-1.49808	0.0444785	0.378221	0.347856	1269	tags=26%, list=10%, signal=23%	F2/PDZD11/BPI/GAPDH/CXCL10/LTF/PGLYRP1/OCIAD2/LYZ/SFTPD/LEAP2/CXCL14
BP	GO:0018298	protein-chromophore linkage	11	-0.833199	-1.4676	0.0445633	0.378506	0.348118	838	tags=27%, list=7%, signal=25%	OPN4/AMBP/OPN1SW
BP	GO:0002260	lymphocyte homeostasis	39	-0.683682	-1.49476	0.0448223	0.379831	0.349337	1974	tags=31%, list=16%, signal=26%	GPAM/ABL1/DOCK10/TNFRSF13B/PKN1/BAX/DOCK11/BCL10/TNFSF13B/LYN/SLC46A2/RC3H2
BP	GO:0050830	defense response to Gram-positive bacterium	39	-0.684095	-1.49566	0.0448223	0.379831	0.349337	1963	tags=28%, list=15%, signal=24%	TNFRSF14/CTSG/C5AR1/CARD9/TIRAP/MPEG1/CRP/LTA/PGLYRP1/LYZ/LBP
BP	GO:1903052	positive regulation of proteolysis involved in cellular protein catabolic process	97	0.477483	1.35981	0.0448822	0.379903	0.349403	631	tags=12%, list=5%, signal=12%	PSMC4/SGTA/PSMC3/EGF/PSMC2/PSMC1/HSPBP1/VCP/LRRK2/USP5/FBXW7/KLHL40
MF	GO:0016712	oxidoreductase activity, acting on paired donors, with incorporation or reduction of molecular oxygen, reduced flavin or flavoprotein as one donor, and incorporation of one atom of oxygen	13	-0.821784	-1.48513	0.0449827	0.380153	0.349633	1124	tags=62%, list=9%, signal=56%	CYP2A13/CYP19A1/CYP2U1/CYP4B1/CYP2R1/CYP2J2/CYP1A1/CYP3A4
BP	GO:0050732	negative regulation of peptidyl-tyrosine phosphorylation	44	-0.679591	-1.49776	0.0450311	0.380153	0.349633	1044	tags=14%, list=8%, signal=13%	CADM4/SFRP2/ERRFI1/NTF3/CAV1/PRKCZ
BP	GO:0051930	regulation of sensory perception of pain	25	0.675456	1.51136	0.0450662	0.380153	0.349633	437	tags=16%, list=3%, signal=15%	IL10/VIP/OPRM1/NMUR2
BP	GO:0048535	lymph node development	14	-0.809681	-1.4749	0.0452174	0.380993	0.350405	845	tags=43%, list=7%, signal=40%	TGFB1/NKX2-3/TOX/LTA/CD248/RC3H2
MF	GO:0003823	antigen binding	29	-0.729665	-1.50375	0.045677	0.384426	0.353563	1231	tags=38%, list=10%, signal=34%	ABO/DHCR24/TAP1/HLA-DPB1/SLC7A9/SIRPA/IGLL1/CD209/HLA-DPA1/MFAP4/PLG
BP	GO:0048593	camera-type eye morphogenesis	98	-0.582455	-1.4215	0.0457797	0.384448	0.353583	2035	tags=27%, list=16%, signal=22%	KDM2B/IFT172/WNT2B/BMP7/USH1C/AHI1/SOX11/YY1/BAX/FRS2/DLL1/RBP4/PTN/PDE6C/IGFN1/CRB2/RORB/DSCAM/C12orf57/BCAR3/SDK1/SOX9/WNT5A/LHX1/VSX1/COL8A2
BP	GO:0007178	transmembrane receptor protein serine/threonine kinase signaling pathway	272	-0.484324	-1.3116	0.0457921	0.384448	0.353583	1570	tags=17%, list=12%, signal=15%	SOX11/SMAD5/SMAD1/ONECUT1/TBX20/CDKN2B/SMAD3/NODAL/JUN/SFRP5/DACT2/BMP5/TMEM100/SMPD3/SMAD6/FLCN/F11R/LOX/FSTL1/TGFBR2/RBPMS/MAPK14/CRB2/BMPR1B/INHBB/VWC2L/SFRP2/PDPK1/PBLD/CITED1/GDF10/HOXA13/PARD6A/HES1/CAV2/COL1A2/CAV1/SMAD9/WNT5A/SOSTDC1/HTRA3/MSX1/PRKCZ/HTRA1/AMH
BP	GO:0090305	nucleic acid phosphodiester bond hydrolysis	241	0.402929	1.26238	0.0458358	0.384448	0.353583	2873	tags=29%, list=23%, signal=23%	TSEN15/ANKRD31/XRN1/AGO1/REXO1/APTX/ERI2/DICER1/RAD1/APLF/REV3L/EME1/DIS3L/DIS3L2/SND1/EXOSC6/ASTE1/RAD9A/NOP14/ELAC1/RFC1/ERN1/REXO2/BMS1/RBX1/NHP2/KPNB1/HSF1/PGBD5/ANGEL2/UTP20/POP1/RRS1/RRP36/GTF2H3/NCBP2/ANKLE1/ZC3H12C/CNOT1/ANGEL1/KRI1/RFC3/PNKP/CPSF1/RPP38/ERCC4/EXOSC5/MEIOB/RPS21/EXD2/GTF2H5/ENPP2/PNPT1/ERCC2/ABT1/RPA2/EXOSC9/PMS2/PLD6/TSN/ENDOG/CNOT8/SLX1B/UBA52/RFC2/PIWIL1/DDB1/NOL9/APAF…
BP	GO:0046031	ADP metabolic process	104	0.461506	1.31088	0.0458964	0.38452	0.353649	911	tags=16%, list=7%, signal=15%	INS/JMJD8/NUP205/NUP35/EIF6/AK9/ARNT/PRKAG2/SEC13/OGDH/NUP210/NUP188/NUP107/TPR/ALDOC/GALK1/NUP98
BP	GO:0042491	inner ear auditory receptor cell differentiation	30	-0.723346	-1.50995	0.046252	0.386809	0.355755	2247	tags=43%, list=18%, signal=36%	MYO6/PLS1/MCOLN3/USH1C/WDPCP/SOD1/MYCL/DLL1/SLC9A3R1/TRIOBP/MYO7A/HES1/LRTOMT
BP	GO:0042762	regulation of sulfur metabolic process	11	-0.831746	-1.46504	0.0463458	0.386809	0.355755	1429	tags=27%, list=11%, signal=24%	PDK1/GSTZ1/BHMT
BP	GO:0042632	cholesterol homeostasis	57	-0.654385	-1.4782	0.0463679	0.386809	0.355755	1749	tags=30%, list=14%, signal=26%	NPC2/RALY/SIRT1/APOA4/LAMTOR1/APOA1/APOB/RORA/APOE/APOC2/LCAT/DGAT2/CAV1/ABCB11/ABCG5/MALRD1/ABCG8
BP	GO:0110149	regulation of biomineralization	71	-0.623906	-1.45995	0.0464072	0.386809	0.355755	1946	tags=27%, list=15%, signal=23%	BMP7/GPM6B/PHOSPHO1/MATN1/PTK2B/SMAD3/CYP27B1/WNT10B/SLC8A1/ADGRV1/PTN/BMPR1B/ANKH/TMEM119/LTF/SOX9/BGLAP/AHSG/ECM1
BP	GO:0016925	protein sumoylation	69	0.506695	1.36586	0.0465039	0.386809	0.355755	1759	tags=22%, list=14%, signal=19%	NUP205/NUP35/ARNT/SAE1/NUP210/NUP188/NUP107/TPR/NUP98/ZMIZ1/HDAC4/NUP155/NUP153/MDM2/RANGAP1
BP	GO:0072522	purine-containing compound biosynthetic process	148	-0.540432	-1.38884	0.0465753	0.386809	0.355755	1139	tags=12%, list=9%, signal=11%	ADCY1/ADCY8/HACD2/ALDOA/CBR4/NPR1/FASN/AK1/APRT/AMPD1/GSTZ1/PPT1/ACLY/PID1/NME4/ACSL5/ACSS2/SCD5
BP	GO:0002823	negative regulation of adaptive immune response based on somatic recombination of immune receptors built from immunoglobulin superfamily domains	24	-0.732209	-1.47081	0.046589	0.386809	0.355755	1358	tags=25%, list=11%, signal=22%	PARP3/ZC3H12A/BCL6/NDFIP1/LOXL3/RC3H2
BP	GO:0043171	peptide catabolic process	23	-0.733301	-1.4612	0.046589	0.386809	0.355755	1657	tags=35%, list=13%, signal=30%	ENPEP/CTSH/ANPEP/DPEP1/GGT1/CPN1/ACE/GGT5
CC	GO:0098533	ATPase dependent transmembrane transport complex	13	-0.816401	-1.47541	0.0467128	0.387401	0.356299	366	tags=31%, list=3%, signal=30%	ATP1B4/ATP1A2/ABCG5/ABCG8
CC	GO:0046930	pore complex	20	-0.74836	-1.46482	0.0468227	0.387877	0.356737	1671	tags=45%, list=13%, signal=39%	ADAM10/BAX/C6/PDZD11/C8G/C8A/C8B/TSPAN33/C7
BP	GO:0043628	ncRNA 3'-end processing	34	0.60414	1.41772	0.0469835	0.388772	0.35756	2270	tags=29%, list=18%, signal=24%	ERI2/INTS8/INTS5/EXOSC6/ELAC1/FBL/INTS12/EXOSC5/SSB/RPS21
BP	GO:0019218	regulation of steroid metabolic process	93	-0.577868	-1.38809	0.0471281	0.389395	0.358132	1650	tags=29%, list=13%, signal=25%	SIRT1/APOA4/SEC14L2/SOD1/BMP5/LAMTOR1/AGT/CYP27B1/APOA1/APOB/FASN/FMO5/RORA/CYP51A1/HMGCR/TM7SF2/APOE/CLCN2/LSS/NR0B1/IDI1/DHCR7/DGAT2/SQLE/ABCB11/SC5D/MALRD1
BP	GO:0031667	response to nutrient levels	355	-0.457372	-1.26434	0.0473373	0.389395	0.358132	1779	tags=18%, list=14%, signal=16%	ADCYAP1/SESN1/CD40/PCK1/GHSR/SRC/WDR59/GATA4/GNAI2/SIRT1/FOLR2/NIM1K/SLC2A1/SOD1/CDKN2B/JUN/GPT/ARSB/FAM107A/BRSK2/VPS41/FLCN/CYP27B1/SLC8A1/PTN/STK26/APOA1/EIF2AK3/ZC3H12A/TGFBR2/EEF2/LTA/PHEX/GNPAT/LRAT/NENF/GSN/INHBB/BCL10/CXCL10/CPS1/SPARC/UCP2/SFRP2/APOE/CIDEB/NTRK1/SORD/COL1A1/TYR/SLC6A19/ITGA2/BGLAP/AACS/ABCG5/EPO/SLC10A1/CYP1A1/ABCG8/UCP3/BCHE/AOC1/HSD11B2/POSTN
BP	GO:0034754	cellular hormone metabolic process	91	-0.584961	-1.40433	0.0474074	0.389395	0.358132	1420	tags=22%, list=11%, signal=20%	TTR/BMP5/CRABP1/SCPEP1/CYP19A1/RBP4/HSD17B4/LRAT/RDH16/CYP46A1/RDH11/CLCN2/ALDH8A1/HSD17B7/DGAT2/DHRS3/HSD3B1/RDH8/CYP1A1/CYP3A4
CC	GO:0030660	Golgi-associated vesicle membrane	42	0.589306	1.45796	0.0474106	0.389395	0.358132	1662	tags=52%, list=13%, signal=46%	CFTR/CLTB/GJA1/COPZ2/COPG2/PI4KA/AP1G2/CNGB1/TMED7/COPA/TMED2/COPE/KDELR2/COPZ1/CLTC/SYNRG/ARCN1/SCYL1/COPB1/COPB2/AP2A1/AP1G1
BP	GO:0006805	xenobiotic metabolic process	58	-0.647141	-1.4696	0.0474732	0.389395	0.358132	1076	tags=38%, list=8%, signal=35%	NAT1/SULT1A1/FMO2/CYP2A13/GUK1/BPHL/DPEP1/CYB5R3/CYP2U1/GGT1/RORA/CES2/CYP46A1/GSTA4/NR1I2/CYP2R1/PON3/CMBL/CYP2J2/CYP1A1/CYP3A4/AOC1
MF	GO:0004930	G protein-coupled receptor activity	299	-0.483647	-1.3209	0.0474799	0.389395	0.358132	2392	tags=27%, list=19%, signal=23%	GABBR1/FZD3/GPR21/QRFPR/PDGFRL/CNR2/GPR146/TACR3/ACKR4/PTH2R/GPR34/ACKR3/PPARG/ADORA2A/F2R/MCHR2/GRM1/GPR22/LPAR4/PTGER4/GHSR/C5AR1/GPR26/CXCR4/ADORA1/ADORA3/GRM8/ADGRG4/GABBR2/HCRTR2/ADGRA1/FZD10/APLNR/LPAR3/ADGRG6/PTH1R/GPR153/HTR6/ADGRG2/GPR157/GPR68/P2RY12/ADGRV1/GPR182/CALCRL/AGTRAP/CELSR1/EDNRA/FZD7/GP1BA/SIGMAR1/GLP1R/ADGRL4/NPR1/GPRC5C/OPN4/FPR2/LGR5/FZD2/ADGRB3/AVPR2/OGFRL1/CCR9/RORB/FZD…
MF	GO:0005184	neuropeptide hormone activity	18	0.707259	1.44475	0.0474976	0.389395	0.358132	338	tags=17%, list=3%, signal=16%	NMB/VIP/NPPA
CC	GO:0016442	RISC complex	14	0.783086	1.5221	0.0475335	0.389395	0.358132	749	tags=36%, list=6%, signal=34%	AGO1/DICER1/DDX6/DHX9/SND1
CC	GO:0031332	RNAi effector complex	14	0.783086	1.5221	0.0475335	0.389395	0.358132	749	tags=36%, list=6%, signal=34%	AGO1/DICER1/DDX6/DHX9/SND1
BP	GO:0046688	response to copper ion	21	-0.763335	-1.5003	0.0476466	0.389609	0.35833	410	tags=29%, list=3%, signal=28%	SOD1/PARK7/SORD/CYP1A1/BACE1/AOC1
BP	GO:0050930	induction of positive chemotaxis	10	-0.833953	-1.45562	0.0477032	0.389609	0.35833	867	tags=40%, list=7%, signal=37%	VEGFC/CXCL12/PGF/NTF3
BP	GO:0098813	nuclear chromosome segregation	223	0.389552	1.21481	0.0477255	0.389609	0.35833	2172	tags=22%, list=17%, signal=19%	TEX12/DYNC1H1/ANKRD31/APC/ANAPC4/EME1/FBXW7/TRIP13/TPR/DIS3L2/FANCD2/NUDC/STAG1/AXIN2/RCC2/WAPL/SPDL1/FMN2/CHMP2B/PHB2/INO80/PSMG2/CDC6/CDK5RAP2/SIRT7/RAD51C/HNRNPU/KPNB1/IK/NCAPH2/SMC3/ESCO1/REC8/CHMP5/RRS1/DYNC1LI1/WRAP73/DCTN2/CCNB1IP1/KLHL22/MCMBP/RAB11A/MAP10/ERCC4/TUBG1/TNKS/AGO4/NAA50/MEIOB
BP	GO:1903131	mononuclear cell differentiation	281	-0.477086	-1.30086	0.0477941	0.389609	0.35833	2006	tags=25%, list=16%, signal=21%	ITGB1/TLR9/ABL1/JMJD6/BLNK/EOMES/TYRO3/MAFB/ANXA1/TPD52/PTGER4/PCK1/LYL1/DOCK10/MERTK/SLAMF6/PTK2B/YY1/CDK6/HLX/ONECUT1/SOD1/BAX/JUN/ZFP36L2/CSF1R/MFNG/ITPKB/BTK/TRPM2/DLL1/RUNX3/MALT1/GPR68/CRTAM/ITM2A/DOCK11/FZD7/ATP11C/ZC3H12A/TGFBR2/FASN/PIK3R1/GATA3/RORA/DLL4/TMEM176B/NRARP/CCR9/PIK3R6/SPI1/LYN/BCL6/DUSP10/SLC46A2/TESPA1/BLK/PIR/NDFIP1/MMP14/NTRK1/FLT3/LOXL3/KAT7/SOX4/RC3H2/CSF1/PRKCZ/CCR6
CC	GO:0005796	Golgi lumen	66	-0.62514	-1.44448	0.0479042	0.389609	0.35833	1384	tags=27%, list=11%, signal=24%	RAB33B/F2/PROZ/NCAN/PROC/F9/WNT5B/VCAN/MMP14/PRELP/PDGFA/MUC13/BGLAP/WNT5A/MMP11/CSPG5/DCN/LUM
BP	GO:0048477	oogenesis	57	-0.652116	-1.47307	0.0479134	0.389609	0.35833	1774	tags=26%, list=14%, signal=23%	NPR2/SRC/PTK2B/HEXB/CCNB1/BRCA2/PAQR5/PTN/LGR5/BMPR1B/INHBB/MEIOC/DMC1/NANOS2/AMH
BP	GO:0042738	exogenous drug catabolic process	11	-0.829327	-1.46078	0.0481283	0.389609	0.35833	1026	tags=55%, list=8%, signal=50%	CYP2A13/CYP2U1/NR1I2/CYP2R1/CYP2J2/CYP3A4
CC	GO:0044214	spanning component of plasma membrane	11	-0.829011	-1.46022	0.0481283	0.389609	0.35833	334	tags=27%, list=3%, signal=27%	TM2D3/CDHR2/SLC15A2
BP	GO:0072584	caveolin-mediated endocytosis	11	-0.829616	-1.46129	0.0481283	0.389609	0.35833	1728	tags=64%, list=14%, signal=55%	SRC/UNC119/CLN3/NEDD4L/ITSN1/PACSIN2/CAV1
BP	GO:0006958	complement activation, classical pathway	21	-0.760631	-1.49499	0.0481403	0.389609	0.35833	1351	tags=57%, list=11%, signal=51%	C4B/C6/C8G/CRP/C1QC/C8A/C1QA/CFI/IGLL1/SERPING1/C8B/C7
BP	GO:0071425	hematopoietic stem cell proliferation	21	-0.761394	-1.49649	0.0481403	0.389609	0.35833	1089	tags=38%, list=9%, signal=35%	WNT2B/THPO/WNT10B/SFRP2/KITLG/ACE/KAT7/WNT5A
BP	GO:0007584	response to nutrient	143	-0.539785	-1.37635	0.0484094	0.391358	0.359938	1132	tags=19%, list=9%, signal=17%	CYP27B1/SLC8A1/PTN/APOA1/TGFBR2/EEF2/LTA/PHEX/GNPAT/LRAT/GSN/CXCL10/SPARC/SFRP2/COL1A1/TYR/SLC6A19/ITGA2/BGLAP/AACS/ABCG5/EPO/CYP1A1/ABCG8/UCP3/BCHE/POSTN
BP	GO:1903405	protein localization to nuclear body	12	0.780442	1.45578	0.0486004	0.392043	0.360568	1721	tags=50%, list=14%, signal=43%	CCT3/CCT6A/CCT4/CCT8/CCT7/CCT5
BP	GO:1904867	protein localization to Cajal body	12	0.780442	1.45578	0.0486004	0.392043	0.360568	1721	tags=50%, list=14%, signal=43%	CCT3/CCT6A/CCT4/CCT8/CCT7/CCT5
BP	GO:0045777	positive regulation of blood pressure	26	-0.722404	-1.47793	0.0488599	0.393598	0.361998	1100	tags=38%, list=9%, signal=35%	ADRA1D/CARTPT/TACR3/ID2/ADORA1/F11R/GLP1R/ADH5/ACE/HSD11B2
BP	GO:0032970	regulation of actin filament-based process	301	-0.470251	-1.28269	0.0488998	0.393598	0.361998	2337	tags=25%, list=18%, signal=21%	SERPINF2/EVL/PREX1/RHOB/LIMK1/SYNPO2L/ARF6/TMSB4X/SIGLEC15/PXN/CORO2B/PRKCD/RAC2/EPHA3/DSG2/TNNC1/KCNJ2/ABL1/GPM6B/NPHS1/CDC42EP1/PTGER4/ADORA1/GATA4/PTK2B/PPP1R9A/CDK5/SMAD3/DSP/FZD10/CSF1R/SPIRE2/FAM107A/RAC3/ECT2/TRPM2/TACSTD2/F11R/TMOD4/HCK/TMOD3/BIN1/ARHGEF5/HIP1R/CELSR1/APOA1/ARHGEF19/TRIOBP/GJA5/ELN/NOX4/PDXP/PPM1E/PIK3R1/SMIM22/FSCN1/CXCL12/SPTBN5/FGF13/GSN/SWAP70/WASF2/ACTN2/ARPC1B/RGCC/…
CC	GO:0005685	U1 snRNP	16	0.729217	1.46239	0.0490714	0.393758	0.362146	3386	tags=62%, list=27%, signal=46%	SNRPN/SNRPG/SNRPA/SNRPB2/SNRPF/SNRNP70/SNRPE/SNRPD2/PRPF39/SNRPD1
BP	GO:0042446	hormone biosynthetic process	55	-0.643665	-1.44979	0.0490798	0.393758	0.362146	445	tags=15%, list=4%, signal=14%	CYP27B1/CYP19A1/CLCN2/HSD17B7/DHCR7/HSD3B1/RDH8/DIO1
BP	GO:0052547	regulation of peptidase activity	293	-0.472391	-1.28815	0.0490798	0.393758	0.362146	1682	tags=24%, list=13%, signal=21%	SPINT1/A2ML1/SIRT1/SPOCK2/TANK/FBLN1/CST3/RENBP/BAX/COL28A1/SMAD3/CARD9/NODAL/PARK7/CFLAR/C4B/GRIN2B/RNF34/CTSH/DHCR24/FN1/CTSD/AGT/MALT1/UACA/DPEP1/LXN/BIN1/HIP1R/TNFSF10/CASP9/EIF2AK3/BOK/ITIH2/ARRB1/GAPDH/ANTXR1/XDH/PCOLCE2/GSN/SERPINA10/CRB2/TRAF2/BCL10/ITIH5/LYN/SFRP2/SERPINA1/EFNA1/LTF/EPHA4/A2M/CIDEB/SERPIND1/ACER2/HGF/SERPING1/SERPINH1/WFDC1/PZP/LGMN/AMBP/ANOS1/CAV1/PERP/AHSG/CLDN3/ECM1/E…
BP	GO:0060968	regulation of gene silencing	92	0.477454	1.35327	0.0491791	0.394127	0.362485	1370	tags=20%, list=11%, signal=18%	NUP205/AGO1/NUP35/SEC13/NUP210/EIF4G1/NUP188/DDX6/DHX9/MAP2K2/NUP107/TPR/ESR1/ELAVL1/NUP98/PPP3CA/NUP155/NUP153
MF	GO:0030515	snoRNA binding	28	0.66887	1.53281	0.0493386	0.394317	0.36266	1733	tags=29%, list=14%, signal=25%	WDR3/NUDT5/HEATR1/NOP14/BMS1/NHP2/BYSL/PRKDC
BP	GO:0002455	humoral immune response mediated by circulating immunoglobulin	32	-0.710568	-1.48831	0.0494418	0.394317	0.36266	1351	tags=41%, list=11%, signal=36%	C4B/C6/C8G/CRP/C1QC/C8A/C1QA/LTA/CFI/IGLL1/SERPING1/C8B/C7
BP	GO:0006703	estrogen biosynthetic process	10	-0.832399	-1.45291	0.04947	0.394317	0.36266	1124	tags=40%, list=9%, signal=36%	CYP19A1/HSD17B7/HSD3B1/RDH8
BP	GO:0046322	negative regulation of fatty acid oxidation	10	-0.832914	-1.45381	0.04947	0.394317	0.36266	232	tags=30%, list=2%, signal=29%	ACADL/SOX9/DGAT2
MF	GO:0048407	platelet-derived growth factor binding	10	-0.832927	-1.45383	0.04947	0.394317	0.36266	450	tags=50%, list=4%, signal=48%	COL2A1/PDGFA/COL6A1/COL1A1/COL1A2
BP	GO:0070302	regulation of stress-activated protein kinase signaling cascade	147	-0.538058	-1.37878	0.0497238	0.395482	0.363731	1579	tags=22%, list=12%, signal=19%	PTK2B/GRIK2/DAB2IP/KLHL31/CARD9/HAND2/TIRAP/TNFRSF19/IGF1R/PLCB1/SEMA3A/NCOR1/FZD7/ZC3H12A/SH3RF3/XDH/TRAF2/SPI1/GADD45A/LYN/SIRPA/SFRP2/DUSP10/GADD45B/EZR/RASSF2/TLR3/HGF/AMBP/WNT5A/RAP2A/MAP2K1
BP	GO:0006400	tRNA modification	81	0.484293	1.3424	0.0498111	0.395482	0.363731	2259	tags=20%, list=18%, signal=16%	TRMT10A/MTO1/TRMU/METTL2A/TYW1/THADA/NSUN2/NSUN6/TRMT1L/TRMT61A/METTL6/DPH3/DTWD2/GTPBP3/SSB/NAT10
BP	GO:0072176	nephric duct development	11	-0.828394	-1.45913	0.0499109	0.395482	0.363731	1747	tags=45%, list=14%, signal=39%	AHI1/PKD2/GATA3/EPHA4/LHX1
BP	GO:0048546	digestive tract morphogenesis	38	-0.684261	-1.48718	0.049922	0.395482	0.363731	2505	tags=42%, list=20%, signal=34%	SHH/EPB41L5/NKX2-3/ID2/AHI1/EPHB3/GATA4/SOX11/HLX/GLI1/SMAD3/NODAL/SFRP5/SFRP2/FOXF1/WNT5A
BP	GO:0071548	response to dexamethasone	38	-0.686455	-1.49195	0.049922	0.395482	0.363731	1768	tags=24%, list=14%, signal=20%	PCK1/GHSR/CFLAR/FBXO32/DDIT4/CPS1/FIBIN/ERRFI1/EPO
BP	GO:0050678	regulation of epithelial cell proliferation	262	-0.482839	-1.30277	0.0499376	0.395482	0.363731	1742	tags=21%, list=14%, signal=19%	GHSR/C5AR1/B4GALT1/SIRT1/RGN/SOX11/CDK6/GLI1/DAB2IP/BAX/CDKN2B/SMAD3/NODAL/APLNR/BMP5/CFLAR/FRS2/BRCA2/EPPK1/RUNX3/WNT10B/PTN/GATA2/FZD7/IGF2/VEGFC/GATA3/CXCL12/DLL4/XDH/NRARP/SPARC/SFRP2/HPN/DUSP10/PDPK1/PGF/RGCC/MST1/PBLD/APOE/PGR/PEX2/ERRFI1/HES1/INTU/CAV2/WFDC1/TNMD/NRP1/SOX9/CAV1/WNT5A/ECM1/TNFSF12/HTRA1
BP	GO:0019985	translesion synthesis	34	0.599426	1.40666	0.0502518	0.396622	0.36478	2791	tags=29%, list=22%, signal=23%	VCP/REV3L/NPLOC4/RFC1/RFC3/POLH/RPA2/PRIMPOL/UBA52/RFC2
BP	GO:0031099	regeneration	158	-0.523859	-1.35756	0.0502717	0.396622	0.36478	1732	tags=23%, list=14%, signal=20%	C5AR1/RTN4R/GATA4/LPIN1/RGN/PTPRS/CERS2/GLI1/CFLAR/CCNB1/EPPK1/WNT10B/NINJ1/PTN/APOA1/FZD7/TGFBR2/TM4SF4/AKIRIN1/CD9/PRRX1/CXCL12/GSN/TEC/TEC/UCP2/DUSP10/EPHA4/ANGPT2/HGF/NR0B2/MYOZ1/FLT3/ENO3/MAP2K1/POSTN
BP	GO:0001782	B cell homeostasis	23	-0.738325	-1.47121	0.0502821	0.396622	0.36478	1962	tags=43%, list=15%, signal=37%	ABL1/DOCK10/TNFRSF13B/PKN1/BAX/DOCK11/BCL10/TNFSF13B/LYN/RC3H2
MF	GO:0016405	CoA-ligase activity	17	-0.775982	-1.47361	0.0503356	0.396622	0.36478	162	tags=29%, list=1%, signal=29%	SLC27A2/SLC27A6/AACS/ACSL5/ACSS2
MF	GO:0070628	proteasome binding	14	0.777267	1.51079	0.0503502	0.396622	0.36478	1504	tags=43%, list=12%, signal=38%	PSMD14/RAD23B/ADRM1/USP14/RAD23A/PSME4
BP	GO:0007006	mitochondrial membrane organization	88	0.477582	1.3464	0.0505714	0.397939	0.365991	2520	tags=32%, list=20%, signal=26%	ADCK1/HSP90AA1/HSPA9/DNAJC11/ACAA2/CLN8/OPA1/HSPA4/COX18/SPG7/IMMT/MFN2/GHITM/TIMM8B/HK2/SAMM50/BCS1L/VDAC2/YWHAG/TIMM13/DYNLT1/PPIF/OMA1/NAIF1/NMT1/NDUFA13/TOMM22/AP3B1
BP	GO:0044241	lipid digestion	15	-0.790973	-1.4512	0.0506993	0.398521	0.366526	962	tags=40%, list=8%, signal=37%	APOA4/APOA1/ARX/ASAH2/ABCG5/ABCG8
BP	GO:0110150	negative regulation of biomineralization	21	-0.739271	-1.45301	0.0509031	0.398945	0.366916	232	tags=19%, list=2%, signal=19%	PTK2B/SOX9/AHSG/ECM1
BP	GO:0044409	entry into host	104	-0.567823	-1.39326	0.0509194	0.398945	0.366916	2006	tags=21%, list=16%, signal=18%	ITGB1/TNFRSF14/EPS15/TRIM11/TYRO3/CDH1/SRC/CXCR4/TRIM8/SLC1A5/CXADR/F11R/ANPEP/GSN/IFITM3/TMPRSS4/CD209/CAV2/NRP1/ITGA2/CAV1/SLC10A1
BP	GO:0048514	blood vessel morphogenesis	487	-0.441947	-1.24319	0.0510783	0.398945	0.366916	2177	tags=26%, list=17%, signal=23%	YAP1/ANGPTL3/FKBP10/SMAD7/NOG/PIK3CG/HMOX1/SERPINE1/MYO1E/MAP2K5/ACKR3/PPARG/TBX5/ITGB1/APOH/CMA1/FGF1/ABL1/JMJD6/ANGPT4/TBX1/PIK3R3/ANXA1/CREB3L1/RSPO3/CD40/GHSR/C5AR1/B4GALT1/EPHB3/PAK4/CXCR4/GATA4/ENPEP/SIRT1/TERT/C1GALT1/CARD10/PTK2B/SMAD1/ANGPTL2/WT1/DAB2IP/TBX20/BAX/NODAL/APLNR/HAND2/JUN/FAP/PKD2/TMEM100/SLC39A12/EPAS1/CTSH/FN1/DLL1/NFATC4/PRCP/ANPEP/LOX/CALCRL/PTN/SAT1/EMP2/GATA2/EDNRA/EIF…
MF	GO:0004745	retinol dehydrogenase activity	10	-0.826899	-1.44331	0.0512367	0.398945	0.366916	749	tags=40%, list=6%, signal=38%	RDH16/RDH11/DHRS3/RDH8
MF	GO:0005247	voltage-gated chloride channel activity	10	-0.830351	-1.44933	0.0512367	0.398945	0.366916	503	tags=30%, list=4%, signal=29%	CLCN7/CLCN1/CLCN2
BP	GO:0038180	nerve growth factor signaling pathway	10	-0.826488	-1.44259	0.0512367	0.398945	0.366916	555	tags=40%, list=4%, signal=38%	MAGI2/SORT1/NTRK1/NTF3
BP	GO:0048548	regulation of pinocytosis	10	-0.827946	-1.44513	0.0512367	0.398945	0.366916	1063	tags=40%, list=8%, signal=37%	CLN3/STX1B/PPT1/CAV1
BP	GO:0008299	isoprenoid biosynthetic process	22	-0.73303	-1.4483	0.0512397	0.398945	0.366916	609	tags=23%, list=5%, signal=22%	HMGCR/LSS/ALDH8A1/IDI1/CYP1A1
BP	GO:0070528	protein kinase C signaling	25	-0.718562	-1.4532	0.0512397	0.398945	0.366916	1019	tags=20%, list=8%, signal=18%	ADGRV1/FIBIN/DGKG/WNT5A/PRKCZ
BP	GO:0045662	negative regulation of myoblast differentiation	18	-0.757679	-1.45705	0.0516667	0.400588	0.368427	1173	tags=28%, list=9%, signal=25%	DLL1/CXCL10/SOX9/SOSTDC1/CXCL14
BP	GO:0043039	tRNA aminoacylation	27	0.661166	1.50658	0.0516695	0.400588	0.368427	3552	tags=52%, list=28%, signal=37%	PPA1/LARS2/FARSA/IARS2/WARS2/AIMP1/CARS2/FARSB/YARS2/AIMP2/DALRD3/EARS2/AARSD1/NARS2
BP	GO:0060966	regulation of gene silencing by RNA	83	0.494988	1.36918	0.0516967	0.400588	0.368427	1370	tags=22%, list=11%, signal=19%	NUP205/AGO1/NUP35/SEC13/NUP210/EIF4G1/NUP188/DDX6/DHX9/MAP2K2/NUP107/TPR/ESR1/ELAVL1/NUP98/PPP3CA/NUP155/NUP153
BP	GO:1901800	positive regulation of proteasomal protein catabolic process	83	0.494215	1.36705	0.0516967	0.400588	0.368427	631	tags=13%, list=5%, signal=13%	PSMC4/SGTA/PSMC3/PSMC2/PSMC1/HSPBP1/VCP/LRRK2/USP5/FBXW7/KLHL40
BP	GO:0198738	cell-cell signaling by wnt	435	0.355524	1.17289	0.0517221	0.400588	0.368427	1434	tags=17%, list=11%, signal=15%	PSMC4/PSMD14/PSMD2/PSMC3/AGO1/EGF/PPM1B/PSMD6/PSMD1/APC/PSMC5/PSMC2/PSMC1/PSMA3/PSMD7/PSMD13/PSMD8/PSMD4/WNT7B/SOX2/PSMD3/VANGL1/OPRM1/NFKB1/PSMB5/PSMA5/PSMC6/WNT9A/PSMB4/PSMD12/VCP/PSMB2/TBX18/NR4A2/RNF220/PTPN23/LRRK2/PSMD11/PSMB1/SOST/PSMA2/ESR1/PORCN/AXIN2/NPHP4/AMOTL2/DISC1/PSMA1/ISL1/TRABD2B/WNT3/PTPRU/PSMA6/FRZB/CTNND2/CLTC/ROR2/PSMA4/AMER2/PPP2R1A/PPP3CA/SMARCA4/LRP5/LRRK1/PSMB3/MDFI/PSMB…
MF	GO:0004714	transmembrane receptor protein tyrosine kinase activity	51	-0.65952	-1.48238	0.0518293	0.400998	0.368804	2013	tags=27%, list=16%, signal=23%	EPHA3/TYRO3/EPHA6/EPHB3/MERTK/CSF1R/ALK/IGF1R/EPHA4/DDR1/NTRK1/FLT3/NRP1/MUSK
BP	GO:0090025	regulation of monocyte chemotaxis	17	-0.77483	-1.47142	0.0520134	0.401959	0.369688	1357	tags=53%, list=11%, signal=47%	MOSPD2/SERPINE1/AIF1/FPR2/CXCL12/CXCL10/LYN/LGMN/S100A14
BP	GO:0098868	bone growth	21	-0.750775	-1.47562	0.0521	0.401959	0.369688	1317	tags=29%, list=10%, signal=26%	MATN1/SMPD3/BNC2/TGFBR2/SOX9/ECM1
BP	GO:0050954	sensory perception of mechanical stimulus	130	-0.541247	-1.36795	0.0521262	0.401959	0.369688	1904	tags=25%, list=15%, signal=22%	TBX1/TMTC4/GABRA5/COL2A1/USH1C/CRYM/CXCR4/SOBP/CDC14A/SLC52A3/HEXB/OTOA/SOD1/ASIC2/CACNA1D/SLC9A3R1/USH2A/ADGRV1/ATP8B1/TRIOBP/CXCL12/FZD4/HPN/GRAP/MYO7A/NTRK1/COL1A1/COL11A1/LRTOMT/ITGA2/COCH/BACE1/OTOR
BP	GO:0001990	regulation of systemic arterial blood pressure by hormone	29	-0.717645	-1.47898	0.0522023	0.401959	0.369688	2056	tags=34%, list=16%, signal=29%	ATP6AP2/F2R/CMA1/CTSG/ENPEP/AGT/REN/AVPR2/ACE/HSD11B2
BP	GO:0016125	sterol metabolic process	133	-0.54378	-1.37547	0.0524138	0.401959	0.369688	1594	tags=25%, list=13%, signal=22%	APOA4/EBP/SEC14L2/SOD1/VLDLR/DHCR24/CYP19A1/CYB5R3/APOA1/APOB/FASN/FMO5/CYP51A1/CYP46A1/HMGCR/CYP27A1/TM7SF2/APOE/ACLY/LIPA/LSS/CYP4V2/NR0B2/MSMO1/IDI1/HSD17B7/DHCR7/CYB5R2/LCAT/DGAT2/SQLE/SC5D/CYP3A4
BP	GO:0023019	signal transduction involved in regulation of gene expression	12	-0.812383	-1.45351	0.0524476	0.401959	0.369688	1434	tags=25%, list=11%, signal=22%	SMAD3/FGF8/MSX1
BP	GO:0038183	bile acid signaling pathway	12	-0.81222	-1.45322	0.0524476	0.401959	0.369688	494	tags=42%, list=4%, signal=40%	CIDEB/DGAT2/ABCG5/SLC10A1/ABCG8
BP	GO:0015740	C4-dicarboxylate transport	21	-0.735847	-1.44628	0.0525452	0.401959	0.369688	1296	tags=43%, list=10%, signal=39%	LRRC8D/SLC13A3/SLC1A2/SLC1A5/SLC1A4/LRRC8E/LRRC8C/SLC25A30/SLC13A5
CC	GO:0005682	U5 snRNP	16	0.721337	1.44659	0.0525516	0.401959	0.369688	527	tags=19%, list=4%, signal=18%	PRPF8/SNRNP200/SNRPN
BP	GO:0016540	protein autoprocessing	16	0.723516	1.45096	0.0525516	0.401959	0.369688	975	tags=12%, list=8%, signal=12%	PCSK2/CTSE
BP	GO:0009410	response to xenobiotic stimulus	67	-0.621624	-1.44239	0.0525526	0.401959	0.369688	1136	tags=34%, list=9%, signal=31%	NAT1/SULT1A1/FMO2/CYP2A13/GUK1/BPHL/E2F1/DPEP1/CYB5R3/CYP2U1/GGT1/RORA/CES2/CYP46A1/GSTA4/NR1I2/CYP2R1/PON3/CMBL/CYP2J2/CYP1A1/CYP3A4/AOC1
BP	GO:0009991	response to extracellular stimulus	372	-0.451955	-1.25311	0.052755	0.40309	0.370728	1779	tags=17%, list=14%, signal=15%	ADCYAP1/SESN1/CD40/PCK1/GHSR/SRC/WDR59/GATA4/GNAI2/SIRT1/FOLR2/NIM1K/SLC2A1/SOD1/CDKN2B/JUN/GPT/ARSB/FAM107A/BRSK2/VPS41/FLCN/CYP27B1/SLC8A1/PTN/STK26/APOA1/EIF2AK3/ZC3H12A/TGFBR2/EEF2/LTA/PHEX/GNPAT/LRAT/NENF/GSN/INHBB/BCL10/CXCL10/CPS1/SPARC/LYN/UCP2/SFRP2/APOE/CIDEB/NTRK1/SORD/COL1A1/TYR/SLC6A19/ITGA2/BGLAP/AACS/ABCG5/EPO/SLC10A1/CYP1A1/ABCG8/UCP3/BCHE/AOC1/HSD11B2/POSTN
BP	GO:0035315	hair cell differentiation	38	-0.678603	-1.47488	0.0530421	0.404864	0.37236	2247	tags=39%, list=18%, signal=33%	MYO6/PLS1/SLC44A4/MCOLN3/USH1C/WDPCP/SOD1/MYCL/DLL1/SLC9A3R1/USH2A/TRIOBP/MYO7A/HES1/LRTOMT
BP	GO:2000403	positive regulation of lymphocyte migration	23	-0.722362	-1.4394	0.0532446	0.40599	0.373395	2109	tags=43%, list=17%, signal=36%	CCL20/TNFRSF14/ADAM10/PTK2B/JAM2/AIF1/CXCL12/CXCL10/WNT5A/CXCL14
BP	GO:0050966	detection of mechanical stimulus involved in sensory perception of pain	11	-0.82493	-1.45303	0.0534759	0.407333	0.374631	783	tags=55%, list=6%, signal=51%	KCNA1/CXCR4/CXCL12/NTRK1/ITGA2/BACE1
BP	GO:0060147	regulation of posttranscriptional gene silencing	82	0.49562	1.36973	0.0535938	0.40781	0.375069	1370	tags=22%, list=11%, signal=20%	NUP205/AGO1/NUP35/SEC13/NUP210/EIF4G1/NUP188/DDX6/DHX9/MAP2K2/NUP107/TPR/ESR1/ELAVL1/NUP98/PPP3CA/NUP155/NUP153
BP	GO:0150104	transport across blood-brain barrier	72	-0.61438	-1.43845	0.0538922	0.409395	0.376527	1482	tags=19%, list=12%, signal=17%	SLC2A1/SLC16A7/SLC1A5/ABCG2/SLC29A1/SLC1A4/SLC9A3R1/APOE/ABCB1/SLC7A2/ATP1A2/SLC6A6/SLC15A2/SLC16A12
BP	GO:0043371	negative regulation of CD4-positive, alpha-beta T cell differentiation	14	-0.794868	-1.44792	0.053913	0.409395	0.376527	2419	tags=64%, list=19%, signal=52%	CBFB/SMAD7/ANXA1/HLX/RUNX3/ZC3H12A/BCL6/LOXL3/RC3H2
BP	GO:0007292	female gamete generation	94	-0.573285	-1.38441	0.0540146	0.409745	0.376849	1774	tags=23%, list=14%, signal=20%	NPR2/SRC/MCM8/SIRT1/TOP2A/PTK2B/HEXB/SPIRE2/CCNB1/BRCA2/PAQR5/PTN/LGR5/BMPR1B/INHBB/GAS2/SYCP2/PGR/MEIOC/DMC1/NANOS2/AMH
BP	GO:0032602	chemokine production	62	-0.630338	-1.44575	0.0542986	0.411055	0.378053	1363	tags=23%, list=11%, signal=20%	CSF1R/AIF1/TIRAP/C1QTNF3/IL17RA/MAVS/SIGIRR/ALOX15B/SIRPA/TLR3/CHIA/WNT5A/LBP/POSTN
BP	GO:0032642	regulation of chemokine production	62	-0.630338	-1.44575	0.0542986	0.411055	0.378053	1363	tags=23%, list=11%, signal=20%	CSF1R/AIF1/TIRAP/C1QTNF3/IL17RA/MAVS/SIGIRR/ALOX15B/SIRPA/TLR3/CHIA/WNT5A/LBP/POSTN
BP	GO:0060964	regulation of gene silencing by miRNA	80	0.496477	1.37262	0.0545466	0.411342	0.378317	1370	tags=22%, list=11%, signal=20%	NUP205/AGO1/NUP35/SEC13/NUP210/EIF4G1/NUP188/DDX6/DHX9/MAP2K2/NUP107/TPR/ESR1/ELAVL1/NUP98/PPP3CA/NUP155/NUP153
BP	GO:0000422	autophagy of mitochondrion	63	0.523451	1.39757	0.0545506	0.411342	0.378317	1599	tags=21%, list=13%, signal=18%	HAX1/VPS13D/VPS13C/FBXW7/CISD2/TSPO/CDC37/MFN2/ATG2A/ATG13/PHB2/HK2/MAP1LC3C
BP	GO:0061726	mitochondrion disassembly	63	0.523451	1.39757	0.0545506	0.411342	0.378317	1599	tags=21%, list=13%, signal=18%	HAX1/VPS13D/VPS13C/FBXW7/CISD2/TSPO/CDC37/MFN2/ATG2A/ATG13/PHB2/HK2/MAP1LC3C
CC	GO:0002178	palmitoyltransferase complex	10	-0.822966	-1.43644	0.0547703	0.411342	0.378317	808	tags=30%, list=6%, signal=28%	ORMDL1/ORMDL3/GOLGA7B
BP	GO:0003174	mitral valve development	10	-0.823812	-1.43792	0.0547703	0.411342	0.378317	1301	tags=40%, list=10%, signal=36%	SMAD6/GJA5/EFNA1/SOX4
BP	GO:0038166	angiotensin-activated signaling pathway	10	-0.822376	-1.43541	0.0547703	0.411342	0.378317	1728	tags=50%, list=14%, signal=43%	SRC/AGTRAP/ACTN2/CA2/CAV1
BP	GO:0045623	negative regulation of T-helper cell differentiation	10	-0.821446	-1.43379	0.0547703	0.411342	0.378317	2150	tags=70%, list=17%, signal=58%	SMAD7/ANXA1/HLX/ZC3H12A/BCL6/LOXL3/RC3H2
MF	GO:0004683	calmodulin-dependent protein kinase activity	24	-0.739592	-1.48564	0.0548046	0.411342	0.378317	1579	tags=29%, list=12%, signal=26%	CAMKV/PTK2B/CAMK1/EEF2K/PHKG1/MKNK2/MAPKAPK3
MF	GO:0016627	oxidoreductase activity, acting on the CH-CH group of donors	52	-0.645181	-1.45227	0.054878	0.411342	0.378317	1205	tags=13%, list=9%, signal=12%	DHCR24/FASN/TM7SF2/TBXAS1/DHCR7/DPYD/PECR
CC	GO:0044615	nuclear pore nuclear basket	12	0.774938	1.44551	0.0548939	0.411342	0.378317	1370	tags=33%, list=11%, signal=30%	NUP35/TPR/NUP98/NUP153
BP	GO:0031347	regulation of defense response	435	0.353646	1.1667	0.055006	0.411441	0.378408	1104	tags=15%, list=9%, signal=14%	INS/PSMC4/IL10/PSMD14/PSMD2/RELB/IL1B/PSMC3/PPM1B/PSMD6/PSMD1/ARG2/SBNO2/PSMC5/PSMC2/HSP90AA1/PSMC1/GJA1/PSMA3/UFL1/PSMD7/PSMD13/PSMD8/PSMD4/PSMD3/CLNK/NFKB1/PSMB5/PSMA5/MED1/PTGIS/IKBKE/PSMC6/PSMB4/SYT11/PSMD12/PSMB2/TNFAIP6/LRRK2/PSMD11/NPLOC4/DHX9/PSMB1/PSMA2/ESR1/ABCE1/FANCD2/SETD6/C1QBP/ABCC1/TAB1/FANCA/PSMA1/CDC37/ISL1/NLRP12/PSMA6/PDE2A/IKBKB/CR1/MAPKBP1/NOD1/CCR7/PSMA4
BP	GO:0009132	nucleoside diphosphate metabolic process	134	0.442971	1.30204	0.0550185	0.411441	0.378408	982	tags=17%, list=8%, signal=16%	INS/JMJD8/NUP205/CMPK1/NUP35/EIF6/ENTPD4/AK9/ARNT/PRKAG2/SEC13/OGDH/NUP210/NUP188/TJP2/NUP107/TPR/ALDOC/NUDT5/GALK1/NUP98/CASK/ENTPD7
MF	GO:0008484	sulfuric ester hydrolase activity	13	-0.806097	-1.45678	0.0553633	0.413182	0.38001	1396	tags=46%, list=11%, signal=41%	ARSB/GNS/ARSD/IDS/SGSH/ARSA
MF	GO:0070402	NADPH binding	13	-0.806972	-1.45837	0.0553633	0.413182	0.38001	884	tags=38%, list=7%, signal=36%	CBR4/TP53I3/KCNAB1/HMGCR/QDPR
CC	GO:0005795	Golgi stack	104	0.456164	1.29571	0.0555521	0.414172	0.38092	1534	tags=22%, list=12%, signal=20%	SLC10A7/NAGPA/ASAP2/RAB34/NSFL1C/RAB27B/SCFD1/YIPF1/AKAP9/NSG1/TMED2/GOLGA3/MGAT4A/PSENEN/GOLGB1/RAB21/NSF/GOLGA2/FUT11/RAB14/USO1/SULF2/GALNT3
BP	GO:0030574	collagen catabolic process	31	-0.70615	-1.47132	0.0556439	0.414437	0.381165	2073	tags=42%, list=16%, signal=35%	CTSK/ITGB1/CTSB/ADAMTS2/CST3/FAP/CTSS/CTSD/MRC2/MMP23B/MMP14/MMP11/MMP2
BP	GO:0042472	inner ear morphogenesis	75	-0.600547	-1.41823	0.0557185	0.414575	0.381291	2005	tags=32%, list=16%, signal=27%	PLS1/SLC44A4/TBX1/COL2A1/MAFB/USH1C/WDPCP/SOBP/SOD1/SLC9A3R1/HESX1/GATA2/TRIOBP/GATA3/PRRX1/FGF8/FZD2/FOXI1/HPN/MYO7A/COL11A1/SOX9/WNT5A/CTHRC1
BP	GO:0036297	interstrand cross-link repair	49	0.56585	1.43238	0.0558926	0.415451	0.382097	2865	tags=33%, list=23%, signal=25%	VCP/EME1/FAAP24/FANCD2/FANCA/ATR/FANCB/RAD51/ATRIP/ERCC4/FANCI/RPA2/FANCG/SLX1B/UBA52/FANCL
BP	GO:0002250	adaptive immune response	246	-0.483996	-1.30184	0.0564617	0.418006	0.384447	1650	tags=24%, list=13%, signal=22%	SIRT1/BTN3A3/SLAMF6/TNFRSF13B/PTK2B/HLX/PKN1/CSK/PLA2G4A/PARP3/C4B/C6/CLEC4C/BTK/CTSS/C8G/RFTN1/CRP/CTSH/C1QC/MALT1/C8A/RAB27A/IL17RA/CLEC4D/CTSC/CD84/EMP2/TAP1/C1QA/ZC3H12A/HLA-DPB1/LTA/CFI/GATA3/RORA/STX7/TRAF2/SWAP70/BCL10/TEC/TEC/TNFSF13B/LYN/ALCAM/BCL6/DUSP10/NDFIP1/IGLL1/CD209/HLA-DPA1/SERPING1/C8B/IL4I1/LOXL3/RC3H2/FGL1/PRKCZ/C7/CCR6
CC	GO:0030867	rough endoplasmic reticulum membrane	24	0.679129	1.51325	0.0566142	0.418006	0.384447	1055	tags=38%, list=8%, signal=34%	SEC61B/SRPRA/SEC61G/SRPRB/SRP9/SEC61A1/SSR4/PLOD1/SUCO
BP	GO:0032872	regulation of stress-activated MAPK cascade	144	-0.532465	-1.35944	0.0566298	0.418006	0.384447	1579	tags=22%, list=12%, signal=19%	PTK2B/GRIK2/DAB2IP/KLHL31/CARD9/HAND2/TIRAP/TNFRSF19/IGF1R/PLCB1/SEMA3A/NCOR1/FZD7/ZC3H12A/SH3RF3/XDH/TRAF2/SPI1/GADD45A/SIRPA/SFRP2/DUSP10/GADD45B/EZR/RASSF2/TLR3/HGF/AMBP/WNT5A/RAP2A/MAP2K1
BP	GO:0048736	appendage development	144	-0.530407	-1.35419	0.0566298	0.418006	0.384447	2168	tags=24%, list=17%, signal=20%	PBX1/NOG/TBX5/IFT172/BMP7/COL2A1/FRAS1/HOXA9/GNAS/ITGA6/WDPCP/SOX11/TMEM231/HOXD12/BAX/HAND2/IQCE/EN1/PRRX1/FGF8/BMPR1B/PLXNA2/KAT2B/SEMA3C/SFRP2/MYH3/HOXA13/SALL4/INTU/SMOC1/SOX9/SOX4/WNT5A/MSX1/RC3H2
BP	GO:0060173	limb development	144	-0.530407	-1.35419	0.0566298	0.418006	0.384447	2168	tags=24%, list=17%, signal=20%	PBX1/NOG/TBX5/IFT172/BMP7/COL2A1/FRAS1/HOXA9/GNAS/ITGA6/WDPCP/SOX11/TMEM231/HOXD12/BAX/HAND2/IQCE/EN1/PRRX1/FGF8/BMPR1B/PLXNA2/KAT2B/SEMA3C/SFRP2/MYH3/HOXA13/SALL4/INTU/SMOC1/SOX9/SOX4/WNT5A/MSX1/RC3H2
CC	GO:0036379	myofilament	18	-0.751555	-1.44527	0.0566667	0.418006	0.384447	2117	tags=67%, list=17%, signal=56%	TPM4/TNNC1/TNNI1/TNNT1/TNNT2/TMOD4/TMOD3/TPM3/TNNC2/TMOD1/TNNT3/TNNI2
CC	GO:0000812	Swr1 complex	11	0.796764	1.46603	0.0566893	0.418006	0.384447	1756	tags=36%, list=14%, signal=31%	ZNHIT1/ANP32E/RUVBL2/BRD8
BP	GO:0010942	positive regulation of cell death	475	-0.438426	-1.23331	0.0566893	0.418006	0.384447	2364	tags=24%, list=19%, signal=20%	MELK/ARHGEF12/DAPK2/PPARGC1A/PREX1/TGM2/RHOB/GRN/TRIM39/PLA2G1B/KNG1/ATG7/STK17A/HMOX1/PRKCD/PPARG/PDCD4/ITGB1/ABL1/NACC2/GNA13/BMP7/ANXA1/TNFRSF1B/NET1/CD40/ITGA6/TNFRSF10C/SRC/B4GALT1/ADORA1/ADAM10/DEDD2/SIRT1/TOP2A/RBCK1/GRIK5/GRIK2/IGFBP3/CDK5/RAPSN/DAB2IP/SOD1/BAX/TFPT/TRIM35/PARK7/JUN/E2F3/FAP/C3orf38/KALRN/GRIN2B/SYCE3/SPDEF/ECT2/CDC34/FLCN/CTSD/NFATC4/AGT/E2F1/SLC9A3R1/WNT10B/CTSC/BIN1/PT…
BP	GO:0009952	anterior/posterior pattern specification	158	-0.518973	-1.3449	0.0570652	0.419997	0.386278	2168	tags=26%, list=17%, signal=22%	PBX1/NOG/ATP6AP2/KDM2B/WNT2B/TBX1/HOXA9/SCMH1/HOXD3/GATA4/YY1/HOXA2/PALB2/WT1/SMAD3/NODAL/TCF15/HOXB2/EN1/FRS2/DLL1/WLS/CDX4/PCGF2/BHLHE40/FGF8/TSHZ1/NRARP/CRB2/PLXNA2/SEMA3C/SFRP2/RNF2/HES1/FOXF1/PBX3/HES2/WNT5A/LHX1/MSX1/HOXD4
MF	GO:0030170	pyridoxal phosphate binding	43	-0.656671	-1.44895	0.057187	0.419997	0.386278	1468	tags=21%, list=12%, signal=19%	ALAS2/GPT/TAT/GAD1/GADL1/GOT2/ACCS/ETNPPL/CSAD
BP	GO:0045123	cellular extravasation	43	-0.657083	-1.44986	0.057187	0.419997	0.386278	2607	tags=35%, list=21%, signal=28%	PLVAP/CRKL/IL1R1/PIK3CG/ITGB1/PTGER4/JAM2/PLCB1/F11R/TRIM55/SELL/CXCL12/SIRPA/ST3GAL4/CCL25
MF	GO:0070279	vitamin B6 binding	43	-0.656671	-1.44895	0.057187	0.419997	0.386278	1468	tags=21%, list=12%, signal=19%	ALAS2/GPT/TAT/GAD1/GADL1/GOT2/ACCS/ETNPPL/CSAD
MF	GO:0005310	dicarboxylic acid transmembrane transporter activity	21	-0.732209	-1.43913	0.0574713	0.421665	0.387812	1296	tags=33%, list=10%, signal=30%	SLC38A7/ABCC2/SLC13A3/SLC1A5/SLC1A4/SLC25A30/SLC13A5
BP	GO:0070863	positive regulation of protein exit from endoplasmic reticulum	12	0.771071	1.4383	0.057691	0.422447	0.388531	725	tags=33%, list=6%, signal=31%	SEC16A/SEC16B/EDEM1/TM9SF4
BP	GO:0015669	gas transport	12	-0.807383	-1.44456	0.0576923	0.422447	0.388531	603	tags=50%, list=5%, signal=48%	HBG2/RHAG/HBZ/CA2/MB/HBG1
BP	GO:0060113	inner ear receptor cell differentiation	50	-0.646662	-1.45253	0.0579268	0.423744	0.389724	2005	tags=38%, list=16%, signal=32%	PLS1/GABRA5/MCOLN3/USH1C/IFT88/WDPCP/SOD1/MYCL/DLL1/SLC9A3R1/USH2A/ADGRV1/ATP8B1/TRIOBP/FZD2/MYO7A/HES1/LRTOMT/CTHRC1
CC	GO:1990909	Wnt signalosome	12	0.765939	1.42873	0.0581395	0.424879	0.390768	2217	tags=50%, list=17%, signal=41%	APC/LRRK2/WNT3/LRP5/RECK/LRP6
CC	GO:1904813	ficolin-1-rich granule lumen	109	0.464497	1.32797	0.0583822	0.425254	0.391113	1514	tags=28%, list=12%, signal=25%	PSMD14/PSMD2/PSMC3/PSMD6/PSMC2/HSP90AA1/ILF2/PSMD7/PSMD13/PSMD3/PSMA5/PSMD12/VCP/TNFAIP6/PSMD11/PSMB1/ALAD/PSMA2/ALDOC/ARPC5/SRP14/ASAH1/PDAP1/QPCT/CCT8/FTH1/ACTR1B/PSMB7/OSTF1/KPNB1/IMPDH1
BP	GO:0042490	mechanoreceptor differentiation	54	-0.641215	-1.44269	0.0584615	0.425254	0.391113	2005	tags=39%, list=16%, signal=33%	PLS1/SLC44A4/GABRA5/MCOLN3/USH1C/IFT88/WDPCP/SOD1/MYCL/DLL1/SLC9A3R1/USH2A/ADGRV1/ATP8B1/TRIOBP/FZD2/MYO7A/NTRK1/HES1/LRTOMT/CTHRC1
BP	GO:0002820	negative regulation of adaptive immune response	27	-0.700964	-1.43956	0.0585366	0.425254	0.391113	1358	tags=30%, list=11%, signal=27%	SMAD7/TNFRSF14/PARP3/ZC3H12A/BCL6/NDFIP1/LOXL3/RC3H2
BP	GO:0021696	cerebellar cortex morphogenesis	27	-0.704243	-1.4463	0.0585366	0.425254	0.391113	1847	tags=30%, list=15%, signal=25%	KIF14/CBLN1/CDK5/GLI1/DLL1/RORA/LHX1/MAP2K1
BP	GO:0044058	regulation of digestive system process	28	-0.699903	-1.44101	0.0585366	0.425254	0.391113	2375	tags=36%, list=19%, signal=29%	CYP8B1/WNK4/SLC22A5/GHSR/APOA4/HIP1R/APOA1/PTGER3/ABCG5/ABCG8
BP	GO:0110110	positive regulation of animal organ morphogenesis	28	-0.70151	-1.44432	0.0585366	0.425254	0.391113	807	tags=29%, list=6%, signal=27%	FGF1/WNT2B/FRS2/GATA3/FGF8/SOX9/WNT5A/CSF1
BP	GO:0021854	hypothalamus development	17	-0.767741	-1.45796	0.0587248	0.426203	0.391985	1460	tags=29%, list=11%, signal=26%	BAX/SEMA3A/ETS1/NDNF/NR0B1
MF	GO:0015556	C4-dicarboxylate transmembrane transporter activity	13	-0.803784	-1.4526	0.0588235	0.426499	0.392258	1296	tags=31%, list=10%, signal=28%	SLC1A5/SLC1A4/SLC25A30/SLC13A5
BP	GO:0048483	autonomic nervous system development	40	-0.658112	-1.44425	0.0589147	0.426742	0.392481	1570	tags=38%, list=12%, signal=33%	SOX11/HLX/HAND2/HOXB2/FN1/SEMA3A/PLXNA4/EDNRA/ARX/GATA3/PHOX2A/NTRK1/HES1/NRP1/SOX4
MF	GO:0015355	secondary active monocarboxylate transmembrane transporter activity	15	-0.78299	-1.43656	0.0594406	0.430128	0.395596	126	tags=40%, list=1%, signal=40%	SLC6A1/SLC6A13/SLC1A2/SLC16A7/SLC10A1/SLC10A2
MF	GO:0001637	G protein-coupled chemoattractant receptor activity	16	-0.768502	-1.43181	0.0596491	0.430372	0.39582	717	tags=38%, list=6%, signal=35%	ACKR4/ACKR3/CXCR4/CCR9/CMKLR1/CCR6
MF	GO:0004950	chemokine receptor activity	16	-0.768502	-1.43181	0.0596491	0.430372	0.39582	717	tags=38%, list=6%, signal=35%	ACKR4/ACKR3/CXCR4/CCR9/CMKLR1/CCR6
BP	GO:0007597	blood coagulation, intrinsic pathway	16	-0.770155	-1.43489	0.0596491	0.430372	0.39582	1269	tags=56%, list=10%, signal=51%	F2/PRCP/GP9/GP1BB/GP1BA/F9/A2M/SERPING1/F11
BP	GO:0071622	regulation of granulocyte chemotaxis	34	-0.684621	-1.44957	0.0599369	0.432026	0.397341	1363	tags=21%, list=11%, signal=18%	CSF1R/TIRAP/AKIRIN1/CMKLR1/S100A14/CSF1/LBP
BP	GO:0042147	retrograde transport, endosome to Golgi	70	0.499221	1.35351	0.0600497	0.432303	0.397595	2155	tags=26%, list=17%, signal=21%	RIC1/EHD3/LRRK2/HEATR5B/USP7/RAB6A/DCTN1/ARL1/CLTC/RNF126/VPS54/GBF1/ANKFY1/GOSR1/GOSR2/RAB7A/TMEM87A/SPAG9
MF	GO:0050840	extracellular matrix binding	45	-0.65254	-1.44361	0.0600924	0.432303	0.397595	1356	tags=29%, list=11%, signal=26%	ADGRG6/PLEKHA2/CTSS/ELN/NID1/SPARC/TGFBI/COL11A1/SMOC1/ITGA2/CD248/ECM1/DCN
BP	GO:0002696	positive regulation of leukocyte activation	217	-0.487077	-1.29734	0.0601793	0.432505	0.397782	1514	tags=21%, list=12%, signal=19%	HLX/SH3KBP1/CSK/PLA2G4A/AIF1/TIRAP/ITPKB/BTK/RUNX3/MALT1/GRAP2/CLEC4D/CTSC/BLOC1S3/GATA2/ATP11C/HLA-DPB1/TGFBR2/IGF2/PIK3R1/GATA3/ITGAM/PIK3R6/BCL10/TNFSF13B/LYN/SIRPA/BCL6/TMIGD2/DUSP10/PDPK1/TESPA1/PLA2G3/MMP14/IGLL1/CD209/HLA-DPA1/HES1/CD276/MPL/CAV1/SOX4/WNT5A/EPO/PRKCZ/LBP
BP	GO:0060411	cardiac septum morphogenesis	57	-0.635462	-1.43545	0.0602782	0.432795	0.398048	2235	tags=35%, list=18%, signal=29%	SLIT3/SMAD7/NOG/TBX5/BMP7/TBX1/GATA4/SOX11/TBX20/BMP5/SMAD6/TGFBR2/FGF8/FZD2/SEMA3C/HES1/NRP1/DHRS3/SOX4/WNT5A
BP	GO:0031573	intra-S DNA damage checkpoint	12	0.764881	1.42675	0.0604651	0.432986	0.398224	951	tags=25%, list=7%, signal=23%	EME1/FANCD2/RAD9A
BP	GO:0030278	regulation of ossification	91	-0.571995	-1.3732	0.0607407	0.432986	0.398224	1946	tags=33%, list=15%, signal=28%	PBX1/SMAD7/ATRAID/BMP7/GPM6B/PHOSPHO1/PTGER4/MATN1/PTK2B/SOX11/SMAD3/SMAD6/CYP27B1/WNT10B/SLC8A1/ADGRV1/PTN/MAPK14/BMPR1B/ANKH/TMEM119/LTF/INTU/SOX9/BGLAP/DHRS3/WNT5A/AHSG/CSF1/ECM1
BP	GO:0018146	keratan sulfate biosynthetic process	21	-0.729081	-1.43298	0.0607553	0.432986	0.398224	714	tags=33%, list=6%, signal=32%	B4GALT3/CHST6/B4GALT1/B4GALT5/PRELP/ST3GAL4/LUM
MF	GO:0042379	chemokine receptor binding	21	-0.728414	-1.43167	0.0607553	0.432986	0.398224	881	tags=33%, list=7%, signal=31%	CKLF/CXCL12/CXCL10/S100A14/CXCL14/MSMP/CCL25
BP	GO:0009913	epidermal cell differentiation	144	-0.526634	-1.34456	0.0607735	0.432986	0.398224	2419	tags=28%, list=19%, signal=23%	CBFB/ZFP36L1/KRT18/KRT19/MYO6/YAP1/CTSK/PLS1/DSG2/ST14/SLC44A4/KAZN/MCOLN3/ANXA1/USH1C/MAFG/WDPCP/GLI1/SOD1/DSP/MYCL/DLL1/TGM5/CYP27B1/SLC9A3R1/PPHLN1/USH2A/TRIOBP/ALOX15B/KLF7/MYO7A/ERRFI1/HES1/INTU/LRTOMT/ABCA12/DSC1/CTSV/PERP/WNT5A/MAP2K1
BP	GO:1990138	neuron projection extension	144	-0.526712	-1.34476	0.0607735	0.432986	0.398224	1202	tags=15%, list=9%, signal=13%	FN1/SEMA7A/SEMA3A/PLXNA4/SHTN1/SEMA3D/MAP2/CDKL5/CXCL12/DSCAM/SEMA3C/ALCAM/NEDD4L/DDR1/APOE/TWF2/NRP1/SYT4/WNT5A/PRKCZ/POSTN
BP	GO:0000054	ribosomal subunit export from nucleus	14	0.746898	1.45176	0.0608899	0.432986	0.398224	2575	tags=50%, list=20%, signal=40%	EIF6/ABCE1/SDAD1/LTV1/RRS1/NUP88/RAN
BP	GO:0033750	ribosome localization	14	0.746898	1.45176	0.0608899	0.432986	0.398224	2575	tags=50%, list=20%, signal=40%	EIF6/ABCE1/SDAD1/LTV1/RRS1/NUP88/RAN
BP	GO:0009260	ribonucleotide biosynthetic process	135	-0.531025	-1.34353	0.0609418	0.432986	0.398224	1139	tags=13%, list=9%, signal=12%	ADCY1/ADCY8/HACD2/ALDOA/CBR4/NPR1/FASN/AK1/APRT/AMPD1/GSTZ1/PPT1/ACLY/PID1/NME4/ACSL5/ACSS2/SCD5
BP	GO:0010463	mesenchymal cell proliferation	36	-0.680619	-1.46221	0.0610329	0.432986	0.398224	998	tags=31%, list=8%, signal=28%	BMP7/TBX1/HAND2/PTN/TGFBR2/PRRX1/PDGFA/FOXF1/SOX9/WNT5A/MSX1
BP	GO:0050730	regulation of peptidyl-tyrosine phosphorylation	190	-0.500086	-1.31947	0.061039	0.432986	0.398224	1963	tags=20%, list=15%, signal=18%	TNFRSF14/ABL1/ANGPT4/HPX/CD40/SH3BP5L/SRC/ADORA1/PTK2B/GHR/HBEGF/UNC119/CSF1R/AGT/CADM4/FCGR1A/IGF2/NOX4/FGF8/TEC/TEC/LYN/ANGPT1/SFRP2/EFNA1/BTC/EPHA4/PDGFA/KITLG/ERRFI1/HES1/HGF/ACE/FLT3/NTF3/NRP1/CAV1/EPO/PRKCZ
BP	GO:0090026	positive regulation of monocyte chemotaxis	12	-0.806815	-1.44355	0.0611888	0.432986	0.398224	2133	tags=67%, list=17%, signal=56%	MOSPD2/SERPINE1/AIF1/FPR2/CXCL12/CXCL10/LGMN/S100A14
BP	GO:0098856	intestinal lipid absorption	15	-0.778303	-1.42796	0.0611888	0.432986	0.398224	962	tags=33%, list=8%, signal=31%	APOA4/APOA1/FABP2/ABCG5/ABCG8
BP	GO:1902652	secondary alcohol metabolic process	129	-0.532657	-1.33867	0.0611961	0.432986	0.398224	1594	tags=31%, list=13%, signal=27%	FDFT1/UGT1A3/ANGPTL3/APOF/SREBF1/GPAM/FGF1/ERLIN1/NPC2/APOA4/EBP/SEC14L2/SOD1/VLDLR/DHCR24/CYP27B1/CYB5R3/APOA1/APOB/FASN/FMO5/CYP51A1/CYP46A1/HMGCR/CYP27A1/TM7SF2/APOE/ACLY/LSS/NR0B2/MSMO1/IDI1/HSD17B7/DHCR7/CYP2R1/LCAT/DGAT2/SQLE/SC5D/CYP3A4
BP	GO:0016055	Wnt signaling pathway	433	0.348047	1.15024	0.0612527	0.432986	0.398224	1434	tags=16%, list=11%, signal=15%	PSMC4/PSMD14/PSMD2/PSMC3/AGO1/EGF/PPM1B/PSMD6/PSMD1/APC/PSMC5/PSMC2/PSMC1/PSMA3/PSMD7/PSMD13/PSMD8/PSMD4/WNT7B/SOX2/PSMD3/VANGL1/NFKB1/PSMB5/PSMA5/PSMC6/WNT9A/PSMB4/PSMD12/VCP/PSMB2/TBX18/NR4A2/RNF220/LRRK2/PSMD11/PSMB1/SOST/PSMA2/ESR1/PORCN/AXIN2/NPHP4/AMOTL2/DISC1/PSMA1/ISL1/TRABD2B/WNT3/PTPRU/PSMA6/FRZB/CTNND2/CLTC/ROR2/PSMA4/AMER2/PPP2R1A/PPP3CA/SMARCA4/LRP5/LRRK1/PSMB3/MDFI/PSMB7/SOX10/CUL1/…
BP	GO:0055092	sterol homeostasis	58	-0.634791	-1.44156	0.0612557	0.432986	0.398224	1749	tags=29%, list=14%, signal=25%	NPC2/RALY/SIRT1/APOA4/LAMTOR1/APOA1/APOB/RORA/APOE/APOC2/LCAT/DGAT2/CAV1/ABCB11/ABCG5/MALRD1/ABCG8
CC	GO:0098573	intrinsic component of mitochondrial membrane	67	0.509595	1.36837	0.061302	0.432986	0.398224	1580	tags=22%, list=12%, signal=20%	ADCK1/HSPA9/DNAJC11/SLC8B1/COA3/COX18/IMMT/L2HGDH/TOMM20/MFN2/TMEM177/GHITM/COX11/ABCB6/SAMM50
BP	GO:0046546	development of primary male sexual characteristics	98	-0.566535	-1.38264	0.0615165	0.434006	0.399162	1967	tags=22%, list=15%, signal=19%	WNT2B/COL9A3/HOXA9/GATA4/KLHL10/WT1/BAX/SEMA3A/TNFSF10/REN/BOK/HSD17B4/GATA3/SFRP2/TLR3/MMP14/NTRK1/KITLG/NR0B1/SOX9/LHFPL2/WNT5A
BP	GO:0090314	positive regulation of protein targeting to membrane	23	-0.714784	-1.4243	0.0615641	0.434006	0.399162	1486	tags=26%, list=12%, signal=23%	PDZK1/CDK5/ITGAM/CHP1/STOM/MTCL1
BP	GO:0003073	regulation of systemic arterial blood pressure	70	-0.609291	-1.4203	0.061747	0.43488	0.399966	1160	tags=13%, list=9%, signal=12%	AGT/PRCP/REN/EMP2/GJA5/AVPR2/ACE/HSD11B2/POSTN
CC	GO:0070775	H3 histone acetyltransferase complex	10	-0.813855	-1.42054	0.0618375	0.435102	0.40017	588	tags=30%, list=5%, signal=29%	PHF14/ING5/KAT7
BP	GO:0046717	acid secretion	29	-0.701749	-1.44622	0.0619902	0.435347	0.400395	1110	tags=21%, list=9%, signal=19%	SLC9A3R1/HIP1R/PTGER3/ABCB11/SLC10A1/SNX10
BP	GO:1905521	regulation of macrophage migration	29	-0.708414	-1.45996	0.0619902	0.435347	0.400395	1732	tags=38%, list=14%, signal=33%	C5AR1/PTK2B/CSF1R/P2RY12/AKIRIN1/CD200/CMKLR1/CD200R1/MMP14/MST1/CSF1
BP	GO:1903319	positive regulation of protein maturation	17	-0.757482	-1.43848	0.0620805	0.435567	0.400598	728	tags=29%, list=6%, signal=28%	SRC/GSN/HPN/MMP14/SOX4
BP	GO:0017148	negative regulation of translation	111	0.450576	1.28708	0.0623013	0.436586	0.401535	1909	tags=25%, list=15%, signal=22%	PATL2/XRN1/AGO1/IGF2BP1/TSC1/CALR/EIF6/SRP9/EIF4G1/DDX6/TPR/RBM4/LARP1/EIF4A3/HNRNPD/KHSRP/CPEB2/UPF1/NCL/TIA1/NANOS1/SHMT1/EIF3E/IGF2BP2/TNRC6A/IGF2BP3/CNOT1/LSM14A
CC	GO:0005697	telomerase holoenzyme complex	19	0.699216	1.46206	0.0623441	0.436586	0.401535	1850	tags=26%, list=15%, signal=23%	TEP1/PTGES3/NHP2/HNRNPU/LSM11
BP	GO:0043038	amino acid activation	28	0.656887	1.50535	0.0625471	0.437593	0.402461	3552	tags=50%, list=28%, signal=36%	PPA1/LARS2/FARSA/IARS2/WARS2/AIMP1/CARS2/FARSB/YARS2/AIMP2/DALRD3/EARS2/AARSD1/NARS2
CC	GO:0031528	microvillus membrane	22	-0.718097	-1.41879	0.0628099	0.4386	0.403387	1486	tags=41%, list=12%, signal=36%	SLC7A8/PDZK1/SYTL1/PTPRH/SLC9A3R1/DPEP1/EZR/CDHR2/SLC6A6
BP	GO:0050926	regulation of positive chemotaxis	22	-0.721468	-1.42545	0.0628099	0.4386	0.403387	1434	tags=32%, list=11%, signal=28%	SMAD3/VEGFC/CXCL12/PGF/ANGPT2/NTF3/ITGA2
MF	GO:0140375	immune receptor activity	72	-0.601632	-1.40861	0.0628743	0.438634	0.403419	2413	tags=40%, list=19%, signal=33%	PIGR/EBI3/IL1R1/GFRA2/ACKR4/IL17RC/IL5RA/IL1R2/ACKR3/IL17RB/C5AR1/CXCR4/GHR/CSF3R/CTSH/EPOR/IL17RA/IL9R/IFNAR1/FPR2/CCR9/PRLR/FZD4/CMKLR1/CD200R1/HLA-DPA1/FLT3/MPL/CCR6
BP	GO:0046390	ribose phosphate biosynthetic process	141	-0.525261	-1.34013	0.0631001	0.439054	0.403805	1139	tags=13%, list=9%, signal=12%	ADCY1/ADCY8/HACD2/ALDOA/CBR4/NPR1/FASN/AK1/APRT/AMPD1/GSTZ1/PPT1/ACLY/PID1/NME4/ACSL5/ACSS2/SCD5
BP	GO:0033137	negative regulation of peptidyl-serine phosphorylation	23	-0.71348	-1.4217	0.063228	0.439054	0.403805	1460	tags=30%, list=11%, signal=27%	BAX/PAQR3/DDIT4/GADD45A/RASSF2/HGF/CAV1
BP	GO:0034312	diol biosynthetic process	19	-0.747138	-1.44793	0.063228	0.439054	0.403805	481	tags=26%, list=4%, signal=25%	PCBD1/GCH1/ASAH2/ACER2/QDPR
MF	GO:0042056	chemoattractant activity	23	-0.71311	-1.42096	0.063228	0.439054	0.403805	1042	tags=35%, list=8%, signal=32%	COLEC10/VEGFC/FGF8/CXCL10/PGF/HGF/NTF3/WNT5A
BP	GO:0006999	nuclear pore organization	14	0.745486	1.44902	0.0632319	0.439054	0.403805	1515	tags=50%, list=12%, signal=44%	NUP205/NUP35/NUP107/TPR/NUP98/NUP153/AHCTF1
BP	GO:0006956	complement activation	43	-0.651191	-1.43686	0.0633694	0.439575	0.404284	1351	tags=49%, list=11%, signal=44%	C5AR1/MASP1/C4B/C6/F2/C8G/CRP/C1QC/C8A/COLEC10/CFB/C1QA/CFI/RGCC/A2M/CPN1/IGLL1/MFAP4/SERPING1/C8B/C7
BP	GO:0051606	detection of stimulus	213	-0.488721	-1.29633	0.0634715	0.439575	0.404284	1436	tags=14%, list=11%, signal=13%	UNC119/FAP/ASIC2/C4B/PKD2/LXN/CRTAM/ADGRV1/PDE6C/TTN/OPN4/CXCL12/CDH2/OR14J1/HPN/PGLYRP1/NTRK1/METAP2/CA6/RTP3/CDHR2/COL11A1/FOXF1/GNGT1/PLEKHB1/ITGA2/SOX4/OPN1SW/BACE1/LBP
BP	GO:0034427	nuclear-transcribed mRNA catabolic process, exonucleolytic, 3'-5'	11	0.785957	1.44614	0.0634921	0.439575	0.404284	1339	tags=36%, list=11%, signal=33%	SKIV2L/DIS3L2/EXOSC6/TTC37
BP	GO:0042730	fibrinolysis	20	-0.740213	-1.44887	0.0635452	0.439575	0.404284	1373	tags=60%, list=11%, signal=54%	PLAUR/CPB2/SERPINF2/SERPINE1/APOH/FAP/F2/GP1BA/PLAU/SERPING1/PLG/F11
BP	GO:0006699	bile acid biosynthetic process	29	-0.697259	-1.43697	0.0636215	0.439692	0.404391	1939	tags=38%, list=15%, signal=32%	BAAT/HSD3B7/OSBPL2/SIRT1/SLC27A2/ACOT8/HSD17B4/CYP46A1/CYP27A1/ABCB11/MALRD1
MF	GO:0052689	carboxylic ester hydrolase activity	88	-0.572169	-1.3692	0.0639881	0.441811	0.406341	1435	tags=19%, list=11%, signal=17%	PLA2G4A/PLA1A/BPHL/APMAP/ACOT8/CES2/PON2/LIPH/CA2/PLA2G3/LIPA/PON3/LCAT/ABHD6/PLA2G15/GDPD3/BCHE
CC	GO:0000407	phagophore assembly site	28	0.653399	1.49736	0.0641011	0.442178	0.406678	1671	tags=25%, list=13%, signal=22%	STX12/VMP1/ATG101/ATG2A/ATG13/RAB1B/ATG16L1
MF	GO:0042605	peptide antigen binding	14	-0.785185	-1.43028	0.0643478	0.443465	0.407862	1205	tags=50%, list=9%, signal=45%	SLC7A8/DHCR24/TAP1/HLA-DPB1/SLC7A9/CD209/HLA-DPA1
CC	GO:0032982	myosin filament	15	-0.775458	-1.42274	0.0646853	0.44463	0.408934	1811	tags=60%, list=14%, signal=52%	MYBPH/MYH7/MYH6/MYOM2/MYH1/MYH3/MYBPC1/MYBPC2/MYH2
BP	GO:0060572	morphogenesis of an epithelial bud	15	-0.775636	-1.42306	0.0646853	0.44463	0.408934	141	tags=40%, list=1%, signal=40%	SHH/NOG/WNT2B/BMP7/WNT5A/SOSTDC1
BP	GO:1903305	regulation of regulated secretory pathway	109	-0.554515	-1.36137	0.0646976	0.44463	0.408934	1139	tags=15%, list=9%, signal=13%	ADCY1/RAB27A/SYN1/CD84/GATA2/ITGAM/SCAMP5/LYN/PDPK1/PLA2G3/BLK/FOXF1/SYT4/BACE1/P2RY4/CSPG5
CC	GO:0005865	striated muscle thin filament	16	-0.762128	-1.41994	0.0649123	0.445691	0.409909	2117	tags=75%, list=17%, signal=63%	TPM4/TNNC1/TNNI1/TNNT1/TNNT2/TMOD4/TMOD3/TPM3/TNNC2/TMOD1/TNNT3/TNNI2
BP	GO:0002683	negative regulation of immune system process	256	-0.472624	-1.27546	0.065	0.445804	0.410013	1855	tags=24%, list=15%, signal=21%	MAFB/ANXA1/PTGER4/ADCYAP1/ADORA1/NLRX1/MERTK/TNFRSF13B/SOX11/CDK6/HLX/CLEC12B/PKN1/BMP5/PARP3/TKFC/BTK/RUNX3/C1QC/PLCB1/CD22/GPR68/GPR137B/CRTAM/BPI/FCRLB/GNRH1/CD84/APOA1/GATA2/ZC3H12A/DHX58/PIK3R1/CXCL12/CD200/TMEM176B/NRARP/LRRC17/CD200R1/LYN/ANGPT1/BCL6/DUSP10/LTF/BLK/EZR/NDFIP1/TLR3/A2M/KITLG/SERPING1/FOXF1/SOX9/AMBP/LOXL3/SFTPD/TAPBPL/CCL25/RC3H2/FGL1/HTRA1
MF	GO:0008173	RNA methyltransferase activity	58	0.530604	1.39498	0.0650496	0.445804	0.410013	1758	tags=22%, list=14%, signal=19%	TRMT10A/METTL2A/NSUN2/HENMT1/TRMT2A/FBL/NSUN6/TRMT1L/NSUN5/TRMT61A/METTL6/FDXACB1/EMG1
BP	GO:0002697	regulation of immune effector process	251	-0.475614	-1.28039	0.0651629	0.445889	0.410091	1514	tags=22%, list=12%, signal=20%	HLX/CLEC12B/PKN1/DNASE1L3/PARP3/C4B/C6/TKFC/F2/BTK/C8G/SEMA7A/C1QC/MALT1/CD22/C8A/CRTAM/RBP4/CFB/CD84/APOA1/GATA2/C1QA/ZC3H12A/MAVS/DHX58/LTA/CFI/GATA3/ITGAM/STX7/PIK3R6/TRAF2/BCL10/LYN/ANGPT1/BCL6/DUSP10/PDPK1/PLA2G3/BLK/NDFIP1/TLR3/A2M/CPN1/SERPING1/C8B/FOXF1/LOXL3/WNT5A/RC3H2/PRKCZ/C7/HTRA1/LBP
BP	GO:0050892	intestinal absorption	33	-0.676911	-1.4274	0.0651828	0.445889	0.410091	1140	tags=27%, list=9%, signal=25%	APOA4/MOGAT2/F11R/APOA1/SLC2A2/EZR/FABP2/ABCG5/ABCG8
BP	GO:0090303	positive regulation of wound healing	48	-0.63461	-1.42375	0.0652504	0.445938	0.410136	2605	tags=35%, list=20%, signal=28%	CLDN4/MYLK/CPB2/SERPINF2/SERPINE1/F2R/ITGB1/APOH/PLPP3/ANXA1/CXCR4/HBEGF/F2/OCLN/PLG/ST3GAL4/CLDN3
BP	GO:0048562	embryonic organ morphogenesis	233	-0.481127	-1.29032	0.0653266	0.446046	0.410236	2059	tags=27%, list=16%, signal=23%	MTHFD1/KDM2B/PLS1/IFT172/BMP7/SLC44A4/EOMES/TBX1/COL2A1/ID2/MAFB/HOXA9/USH1C/GNAS/AHI1/HOXD3/GATA4/WDPCP/SOBP/SOX11/HOXA2/HLX/GLI1/SOD1/TBX20/SMAD3/NODAL/HAND2/HOXB2/PKD2/FRS2/DLL1/SLC9A3R1/RBP4/HESX1/GATA2/TRIOBP/TGFBR2/PCGF2/GATA3/PRRX1/FGF8/FZD2/TSHZ1/NKX3-2/CRB2/FOXI1/HPN/EFNA1/MYO7A/MMP14/NDRG4/HES1/PAX5/COL11A1/FOXF1/SOX9/MFAP2/WNT5A/LHX1/CTHRC1/MSX1/HOXD4
BP	GO:1902042	negative regulation of extrinsic apoptotic signaling pathway via death domain receptors	36	-0.67215	-1.44402	0.0657277	0.44776	0.411812	2862	tags=42%, list=23%, signal=32%	GPX1/FASLG/TNFRSF10A/RIPK1/HMOX1/SERPINE1/PARK7/BMP5/CFLAR/RNF34/TMBIM1/TNFSF10/TRAF2/SFRP2/HGF
CC	GO:0001401	SAM complex	11	0.785778	1.44581	0.0657596	0.44776	0.411812	1580	tags=36%, list=12%, signal=32%	HSPA9/DNAJC11/IMMT/SAMM50
CC	GO:0140275	MIB complex	11	0.785778	1.44581	0.0657596	0.44776	0.411812	1580	tags=36%, list=12%, signal=32%	HSPA9/DNAJC11/IMMT/SAMM50
BP	GO:0045785	positive regulation of cell adhesion	306	-0.458301	-1.25228	0.0660147	0.449082	0.413028	2541	tags=32%, list=20%, signal=26%	PLAUR/IQGAP1/CRKL/NFKBIZ/CD3E/MIP/SHH/CEACAM6/HSD17B12/FLOT2/NPNT/CBFB/RIN2/EBI3/EPB41L5/NEDD9/SERPINF2/PREX1/STX3/TGM2/DAG1/TNFSF11/SMAD7/SASH3/COL16A1/PLPP3/GPAM/TNFRSF14/ABL1/BMP7/ANXA1/PCK1/ITGA6/KIF26B/MEGF10/SRC/ZFHX3/SPOCK2/PTK2B/CDK6/HLX/CSK/SMAD3/NODAL/EGFL6/AIF1/PLEKHA2/ITPKB/RAC3/FLCN/FN1/RUNX3/MALT1/F11R/P2RY12/GRAP2/PTN/APOA1/EMP2/TRIOBP/HLA-DPB1/TGFBR2/IGF2/PIK3R1/NID1/GATA3/CXCL12/…
BP	GO:0007586	digestion	89	-0.571115	-1.37191	0.0661765	0.449768	0.413659	1140	tags=25%, list=9%, signal=23%	MOGAT2/F11R/RBP4/HIP1R/APOA1/ARX/AMY2A/SLC2A2/EZR/PIR/NPR3/PBLD/FABP2/ASAH2/SI/SOX9/MUC13/PTGER3/CHIA/ABCG5/ABCG8/SNX10
BP	GO:1901617	organic hydroxy compound biosynthetic process	207	-0.489542	-1.29676	0.0663199	0.449787	0.413676	1664	tags=28%, list=13%, signal=24%	MFSD12/SIRT1/APOA4/PTK2B/EBP/IPMK/PAH/SLC27A2/SEC14L2/SOD1/PARK7/HAND2/BMP5/PTH1R/PCBD1/ITPKB/DHCR24/ACOT8/CYP27B1/CYB5R3/APOA1/ASIP/APOB/FASN/PDXP/HSD17B4/GATA3/ALOX15B/CYP51A1/CYP46A1/HMGCR/CYP27A1/TM7SF2/APOE/CITED1/GCH1/P2RY6/ACLY/CLCN2/ASAH2/LSS/ACER2/IP6K2/MSMO1/IDI1/HSD17B7/DHCR7/CYP2R1/CYB5R2/TYR/SQLE/ABCB11/SC5D/WNT5A/QDPR/MALRD1/CYP3A4
BP	GO:0006418	tRNA aminoacylation for protein translation	24	0.671679	1.49665	0.0663622	0.449787	0.413676	3552	tags=58%, list=28%, signal=42%	PPA1/LARS2/FARSA/IARS2/WARS2/AIMP1/CARS2/FARSB/YARS2/AIMP2/DALRD3/EARS2/AARSD1/NARS2
BP	GO:0021516	dorsal spinal cord development	15	-0.767882	-1.40884	0.0664336	0.449787	0.413676	128	tags=53%, list=1%, signal=53%	MDGA1/GDNF/ASCL1/TAL1/DRGX/GSX1/WNT3A/LHX1
BP	GO:0060134	prepulse inhibition	12	-0.800481	-1.43221	0.0664336	0.449787	0.413676	85	tags=17%, list=1%, signal=17%	ADORA2A/BACE1
MF	GO:0043024	ribosomal small subunit binding	14	0.767666	1.49213	0.0665466	0.449787	0.413676	2143	tags=57%, list=17%, signal=48%	EIF4H/ABCE1/LARP1/MTIF2/CPEB2/EIF4B/DHX29/PIM1
CC	GO:0097225	sperm midpiece	19	-0.743954	-1.44176	0.0665557	0.449787	0.413676	17	tags=21%, list=0%, signal=21%	TACR3/IFT172/SLC9A3R1/CCR6
MF	GO:0046915	transition metal ion transmembrane transporter activity	30	0.637506	1.47038	0.0666667	0.449787	0.413676	497	tags=17%, list=4%, signal=16%	SLC39A14/SLC30A5/SLC39A10/SLC39A7/TTYH1
BP	GO:0090288	negative regulation of cellular response to growth factor stimulus	79	-0.583453	-1.38495	0.0666667	0.449787	0.413676	1467	tags=20%, list=12%, signal=18%	DAB2IP/CFLAR/SMAD6/AGT/CADM4/GATA3/XDH/VWC2L/SFRP2/MMRN2/TNMD/WNT5A/SOSTDC1/HTRA3/DCN/HTRA1
BP	GO:0070987	error-free translesion synthesis	20	0.678817	1.44426	0.0668317	0.450488	0.414321	2791	tags=40%, list=22%, signal=31%	VCP/NPLOC4/RFC1/RFC3/POLH/RPA2/UBA52/RFC2
BP	GO:0034121	regulation of toll-like receptor signaling pathway	51	-0.630079	-1.41621	0.0670732	0.450801	0.414609	1995	tags=29%, list=16%, signal=25%	TLR9/TLR1/TYRO3/LRRC14/PTPRS/DAB2IP/TIRAP/CYBA/LYN/LTF/PDPK1/TLR3/TLR5/CAV1/LBP
BP	GO:0031670	cellular response to nutrient	37	-0.66958	-1.45066	0.0670827	0.450801	0.414609	1132	tags=16%, list=9%, signal=15%	CYP27B1/PTN/PHEX/COL1A1/BGLAP/POSTN
MF	GO:0005165	neurotrophin receptor binding	10	-0.807792	-1.40996	0.0671378	0.450801	0.414609	1323	tags=40%, list=10%, signal=36%	FRS2/PIK3R1/NTRK1/NTF3
BP	GO:0060259	regulation of feeding behavior	18	0.70107	1.43211	0.0671642	0.450801	0.414609	1461	tags=17%, list=11%, signal=15%	INS/NR4A3/NPY2R
BP	GO:0006294	nucleotide-excision repair, preincision complex assembly	28	0.638327	1.46282	0.0671835	0.450801	0.414609	2833	tags=36%, list=22%, signal=28%	CCNH/RAD23B/MNAT1/RBX1/GTF2H3/GTF2H5/ERCC2/RPA2/UBA52/DDB1
BP	GO:0003206	cardiac chamber morphogenesis	97	-0.564477	-1.37326	0.0674319	0.452057	0.415764	2150	tags=36%, list=17%, signal=30%	SLIT3/SMAD7/NOG/TBX5/TNNC1/BMP7/TBX1/MYH7/MYH6/GATA4/MYL2/SOX11/TBX20/DSP/HAND2/BMP5/ADGRG6/SMAD6/TNNT2/RBP4/SMARCD3/TGFBR2/GATA3/DLL4/FGF8/FZD2/SEMA3C/SFRP2/HES1/COL11A1/FOXF1/NRP1/DHRS3/SOX4/WNT5A
BP	GO:0046887	positive regulation of hormone secretion	97	0.454917	1.29554	0.0675327	0.452322	0.416008	247	tags=7%, list=2%, signal=7%	RFX6/INS/GCG/NMB/CFTR/GJA1/PDX1
MF	GO:0005507	copper ion binding	42	-0.639855	-1.41065	0.0676923	0.452727	0.41638	1594	tags=38%, list=13%, signal=33%	SUMF1/S100A13/SNCA/COMMD1/LOXL1/AOC3/LOXL4/ATOX1/APOA4/SOD1/PARK7/LOX/CUTA/TYR/LOXL3/AOC1
BP	GO:0001574	ganglioside biosynthetic process	11	-0.808494	-1.42408	0.0677362	0.452727	0.41638	1273	tags=45%, list=10%, signal=41%	ST3GAL5/ST6GALNAC6/B3GALT4/B4GALT5/ST8SIA2
BP	GO:0006084	acetyl-CoA metabolic process	34	-0.669791	-1.41817	0.0678233	0.452727	0.41638	858	tags=18%, list=7%, signal=17%	PPCS/PDK1/FASN/GSTZ1/ACLY/ACSS2
BP	GO:0006096	glycolytic process	96	0.472656	1.34879	0.0678512	0.452727	0.41638	1380	tags=21%, list=11%, signal=19%	INS/JMJD8/NUP205/NUP35/EIF6/ARNT/PRKAG2/SEC13/OGDH/NUP210/NUP188/NUP107/TPR/ALDOC/GALK1/NUP98/HDAC4/NUP155/NUP153/HK2
BP	GO:0071816	tail-anchored membrane protein insertion into ER membrane	14	0.738221	1.4349	0.0679157	0.452727	0.41638	2237	tags=43%, list=18%, signal=35%	SGTA/EMC4/EMC9/EMC10/EMC2/MMGT1
BP	GO:0030168	platelet activation	126	-0.529582	-1.32716	0.0679612	0.452727	0.41638	2123	tags=34%, list=17%, signal=28%	MYL9/LCP2/ADAMTS13/P2RX1/PLCG2/STXBP3/PIK3CG/PRKCD/F2R/GNA13/TYRO3/ADAMTS18/GNAS/GP5/CD40/SRC/ACTB/MERTK/GNG2/PLA2G4A/F2/FN1/F11R/P2RY12/GP9/BLOC1S3/GP1BB/GP1BA/CD9/PIK3R1/ARRB1/PIK3R6/TEC/TEC/LYN/PDPK1/BLK/APOE/PDGFA/COL1A1/COL1A2/MPL/DGKG
BP	GO:0007519	skeletal muscle tissue development	116	-0.542261	-1.34243	0.0680851	0.453144	0.416763	1904	tags=22%, list=15%, signal=19%	TBX1/NPHS1/MEGF10/ASB2/SOX11/HLX/CDK5/CFLAR/DLL1/WNT10B/HMG20B/CASQ1/MYOM2/IGF2/POPDC3/ELN/AKIRIN1/EEF2/MAPK14/KCNAB1/PAX5/CAV2/MYOZ1/MYLPF/CAV1/DCN
BP	GO:0034143	regulation of toll-like receptor 4 signaling pathway	15	-0.766839	-1.40692	0.0681818	0.453154	0.416773	1467	tags=33%, list=12%, signal=30%	DAB2IP/TIRAP/LYN/LTF/LBP
BP	GO:0060537	muscle tissue development	307	-0.46146	-1.2619	0.0682095	0.453154	0.416773	2512	tags=28%, list=20%, signal=23%	MYLK/SHH/BCL9/EFNB2/PRKAA1/NRAP/IGFBP5/DDX17/RARB/HIVEP3/PPARGC1A/MYH11/LRRC10/MEF2D/YAP1/SMAD7/NOG/TBX5/DSG2/TNNC1/BMP7/TBX1/NPHS1/CBY1/MYH7/MYH6/MEGF10/GATA4/KDM6B/MYL2/ASB2/SOX11/YY1/SMAD1/HLX/CDK5/WT1/GLI1/TBX20/SMAD3/DSP/BMP5/CFLAR/PKD2/FRS2/CXADR/TNNT2/CCNB1/DLL1/VGLL4/WNT10B/SLC8A1/LOX/HMG20B/RBP4/CASQ1/MYOM2/TTN/FZD7/TGFBR2/IGF2/POPDC3/ELN/AKIRIN1/EEF2/MAPK14/DLL4/FGF8/KCNAB1/ACTN2/SEMA3C…
BP	GO:0010466	negative regulation of peptidase activity	148	-0.518164	-1.33162	0.0684932	0.454397	0.417916	1728	tags=23%, list=14%, signal=20%	SRC/SPINT1/A2ML1/SPOCK2/CST3/RENBP/COL28A1/PARK7/C4B/RNF34/DHCR24/AGT/DPEP1/LXN/BIN1/ITIH2/GAPDH/SERPINA10/CRB2/ITIH5/SFRP2/SERPINA1/LTF/A2M/SERPIND1/HGF/SERPING1/SERPINH1/WFDC1/PZP/AMBP/ANOS1/AHSG/ECM1
MF	GO:0005164	tumor necrosis factor receptor binding	20	-0.733519	-1.43577	0.0685619	0.454397	0.417916	985	tags=25%, list=8%, signal=23%	TNFSF10/LTA/TRAF2/TNFSF13B/TNFSF12
BP	GO:0003044	regulation of systemic arterial blood pressure mediated by a chemical signal	38	-0.65643	-1.42669	0.0686427	0.454397	0.417916	2056	tags=34%, list=16%, signal=29%	SOD2/ADRA1D/SERPINF2/ATP6AP2/F2R/CMA1/CTSG/ENPEP/AGT/REN/AVPR2/ACE/HSD11B2
BP	GO:0008206	bile acid metabolic process	37	-0.667658	-1.4465	0.0686427	0.454397	0.417916	1939	tags=35%, list=15%, signal=30%	BAAT/HSD3B7/OSBPL2/SIRT1/SLC27A2/ACOT8/UGT2A2/ATP8B1/HSD17B4/CYP46A1/CYP27A1/ABCB11/MALRD1
BP	GO:2000058	regulation of ubiquitin-dependent protein catabolic process	132	0.433824	1.26738	0.0688401	0.455295	0.418742	990	tags=13%, list=8%, signal=12%	DESI1/SGTA/EGF/UFL1/RPL5/HSPBP1/VCP/RAD23B/LRRK2/USP5/FBXW7/USP7/KLHL40/USP14/DISC1/BAG5/N4BP1
BP	GO:0006054	N-acetylneuraminate metabolic process	10	-0.805863	-1.40659	0.0689046	0.455313	0.418759	1797	tags=50%, list=14%, signal=43%	GNPDA1/RENBP/CMAS/NPL/AMDHD2
BP	GO:0045540	regulation of cholesterol biosynthetic process	42	-0.638212	-1.40703	0.0692308	0.456651	0.419989	2216	tags=43%, list=17%, signal=36%	FDFT1/SREBF1/GPAM/FGF1/ERLIN1/SEC14L2/SOD1/APOB/FASN/CYP51A1/HMGCR/TM7SF2/APOE/LSS/IDI1/DHCR7/SQLE/SC5D
BP	GO:0106118	regulation of sterol biosynthetic process	42	-0.638212	-1.40703	0.0692308	0.456651	0.419989	2216	tags=43%, list=17%, signal=36%	FDFT1/SREBF1/GPAM/FGF1/ERLIN1/SEC14L2/SOD1/APOB/FASN/CYP51A1/HMGCR/TM7SF2/APOE/LSS/IDI1/DHCR7/SQLE/SC5D
BP	GO:0006165	nucleoside diphosphate phosphorylation	111	0.443933	1.26811	0.0695096	0.45808	0.421304	911	tags=16%, list=7%, signal=15%	INS/JMJD8/NUP205/CMPK1/NUP35/EIF6/AK9/ARNT/PRKAG2/SEC13/OGDH/NUP210/NUP188/NUP107/TPR/ALDOC/GALK1/NUP98
BP	GO:0051084	'de novo' posttranslational protein folding	26	0.649973	1.45815	0.0695876	0.458186	0.421401	932	tags=27%, list=7%, signal=25%	SDF2L1/SDF2/UGGT1/HSPA9/HSPA5/PTGES3/HSPA13
BP	GO:0071025	RNA surveillance	15	0.722103	1.41963	0.0697674	0.458502	0.421691	801	tags=13%, list=6%, signal=13%	XRN1/EXOSC6
BP	GO:0090110	COPII-coated vesicle cargo loading	12	0.756792	1.41166	0.0697674	0.458502	0.421691	1750	tags=50%, list=14%, signal=43%	SEC24D/SEC13/SEC31A/SEC23B/RAB1A/SEC24A
MF	GO:0000149	SNARE binding	104	0.44633	1.26778	0.069822	0.458502	0.421691	1396	tags=21%, list=11%, signal=19%	SEC24D/CPLX4/CPLX3/NBAS/TMED10/TNFAIP2/STX12/SYT11/STXBP5L/LRRK2/SCFD2/SCFD1/CPLX2/SEC22B/UNC13A/SYT3/NSF/GOLGA2/NAPG/TMED9/SYT9/VPS54
BP	GO:0010631	epithelial cell migration	255	-0.468645	-1.26564	0.0699126	0.458595	0.421777	2406	tags=28%, list=19%, signal=23%	RIN2/EPB41L5/PLCG2/CORO1C/EVL/RHOB/GRN/FOXP1/ARF6/TMSB4X/PXN/PIK3CG/HMOX1/MAP2K5/PPARG/RAB25/APOH/PLPP3/FGF1/ABL1/ANGPT4/PIK3R3/ANXA1/CD40/SRC/WDPCP/SIRT1/CARD10/PTK2B/PTP4A3/PKN1/DAB2IP/HBEGF/ARSB/FAP/TACSTD2/CTSH/EPPK1/AGT/PRCP/SEMA3A/PTN/APOA1/EMP2/GATA2/FSTL1/ZC3H12A/TGFBR2/VEGFC/GATA3/DLL4/PLK2/ETS1/SPARC/GADD45A/ANGPT1/DUSP10/EFNA1/PDPK1/RGCC/ANGPT2/PBLD/APOE/MMRN2/LGMN/NRP1/SOX9/ITGA2/WNT5…
BP	GO:0032413	negative regulation of ion transmembrane transporter activity	50	-0.625358	-1.40468	0.070122	0.458595	0.421777	2628	tags=36%, list=21%, signal=29%	CAB39/FKBP1B/SLC6A9/TCAF2/KCNE4/TLR9/TRDN/SUMO1/PKD2/HECW1/RRAD/SLC9A3R1/KCNAB1/ACTN2/NEDD4L/ATP1A2/CAV1/EPO
BP	GO:0060042	retina morphogenesis in camera-type eye	50	-0.623562	-1.40064	0.070122	0.458595	0.421777	1173	tags=24%, list=9%, signal=22%	DLL1/RBP4/PTN/PDE6C/IGFN1/CRB2/RORB/DSCAM/SDK1/SOX9/LHX1/VSX1
BP	GO:1901880	negative regulation of protein depolymerization	52	-0.624699	-1.40617	0.070122	0.458595	0.421777	1073	tags=25%, list=8%, signal=23%	TMOD4/TMOD3/TRIOBP/SPTBN5/FGF13/GSN/SWAP70/TRIM54/EPS8/TMOD1/CAMSAP1/AVIL/TWF2
BP	GO:0033003	regulation of mast cell activation	29	-0.683603	-1.40882	0.0701468	0.458595	0.421777	967	tags=34%, list=8%, signal=32%	CNR2/HMOX1/RAC2/CD84/GATA2/LYN/PDPK1/PLA2G3/BLK/FOXF1
BP	GO:1904869	regulation of protein localization to Cajal body	11	0.782817	1.44036	0.0702948	0.45875	0.421919	1721	tags=55%, list=14%, signal=47%	CCT3/CCT6A/CCT4/CCT8/CCT7/CCT5
BP	GO:1904871	positive regulation of protein localization to Cajal body	11	0.782817	1.44036	0.0702948	0.45875	0.421919	1721	tags=55%, list=14%, signal=47%	CCT3/CCT6A/CCT4/CCT8/CCT7/CCT5
BP	GO:1903201	regulation of oxidative stress-induced cell death	46	0.554681	1.3877	0.0704208	0.459047	0.422193	1161	tags=20%, list=9%, signal=18%	INS/IL10/TSC1/LRRK2/FBXW7/TRAP1/BAG5/NR4A3/PYCR1
BP	GO:1903707	negative regulation of hemopoiesis	65	-0.607927	-1.40066	0.0704648	0.459047	0.422193	1855	tags=31%, list=15%, signal=26%	MAFB/ANXA1/CDK6/HLX/RUNX3/C1QC/GPR68/GPR137B/GATA2/ZC3H12A/PIK3R1/TMEM176B/NRARP/LRRC17/LYN/BCL6/LTF/TLR3/LOXL3/RC3H2
BP	GO:0047484	regulation of response to osmotic stress	10	-0.805288	-1.40559	0.0706714	0.459662	0.422758	1063	tags=30%, list=8%, signal=28%	CLN3/ABCB1/EPO
BP	GO:0043065	positive regulation of apoptotic process	421	-0.442234	-1.2355	0.0706837	0.459662	0.422758	2364	tags=25%, list=19%, signal=21%	MELK/ARHGEF12/DAPK2/PPARGC1A/PREX1/TGM2/RHOB/GRN/TRIM39/PLA2G1B/KNG1/ATG7/STK17A/HMOX1/PRKCD/PPARG/PDCD4/ITGB1/ABL1/NACC2/GNA13/BMP7/ANXA1/TNFRSF1B/NET1/CD40/ITGA6/TNFRSF10C/SRC/B4GALT1/ADAM10/DEDD2/SIRT1/TOP2A/RBCK1/GRIK5/GRIK2/IGFBP3/CDK5/RAPSN/DAB2IP/SOD1/BAX/TFPT/TRIM35/PARK7/JUN/E2F3/FAP/C3orf38/KALRN/SYCE3/SPDEF/ECT2/CDC34/FLCN/CTSD/NFATC4/AGT/E2F1/SLC9A3R1/WNT10B/CTSC/BIN1/PTN/ARHGEF5/HIP1…
BP	GO:0042159	lipoprotein catabolic process	13	-0.792141	-1.43156	0.0709343	0.460043	0.423109	1188	tags=38%, list=9%, signal=35%	LYPLA1/CTSD/APOB/PPT1/APOE
BP	GO:0036475	neuron death in response to oxidative stress	21	0.673686	1.43611	0.0712468	0.460043	0.423109	1025	tags=19%, list=8%, signal=18%	IL10/TSC1/FBXW7/NR4A3
BP	GO:1904862	inhibitory synapse assembly	14	-0.775499	-1.41263	0.0713043	0.460043	0.423109	1714	tags=36%, list=13%, signal=31%	CBLN1/NLGN2/FGF13/LGI2/WNT5A
CC	GO:0035861	site of double-strand break	55	0.524084	1.36752	0.0714286	0.460043	0.423109	2950	tags=35%, list=23%, signal=27%	UFL1/VCP/APLF/ARPC5/RIF1/ARPC1A/SIRT7/TP53BP1/PRPF19/RAD51/LMNA/INIP/POLH/SMCHD1/ACTR3/RPA2/SMC6/DDB1/PHF1
BP	GO:0046579	positive regulation of Ras protein signal transduction	60	-0.617926	-1.41041	0.0714286	0.460043	0.423109	2249	tags=31%, list=18%, signal=26%	SYNPO2L/PIK3CG/F2R/KRAS/LPAR4/NET1/RTN4R/ITPKB/EPOR/F11R/APOA1/ARRB1/LYN/GPR18/GPR4/NTRK1/KITLG/EPO/CSF1
BP	GO:0034142	toll-like receptor 4 signaling pathway	27	-0.686349	-1.40955	0.0715447	0.460043	0.423109	1467	tags=30%, list=12%, signal=26%	DAB2IP/TIRAP/PIK3AP1/ITGAM/LYN/LTF/S100A14/LBP
BP	GO:0006897	endocytosis	452	-0.437633	-1.22478	0.0715935	0.460043	0.423109	2123	tags=23%, list=17%, signal=20%	PIK3CG/SERPINE1/MYO1E/PPP3CC/ACKR3/PPARG/BTBD9/RAC2/EPHA3/ITGB1/ZFYVE9/SNX12/ABL1/EPS15/JMJD6/NEURL1B/HPX/PSTPIP1/RIN1/AHI1/MEGF10/SRC/TOR1A/GSG1L/MASP1/CACNG2/GHR/TMPRSS5/CDK5/SH3KBP1/UNC119/EEF2K/AIF1/C4B/TMPRSS13/VLDLR/RAB22A/DENND1C/CRP/MRC2/DLL1/XKR5/CD22/NLGN2/SCARA3/CLN3/FCGR1A/GULP1/CALCRL/BIN1/HIP1R/APOA1/RAB17/GATA2/STX1B/TGFBR2/RSPO1/APOB/CD9/CFI/ARRB1/FPR2/ITGAM/SNAP91/GSN/BICD1/WASF2…
BP	GO:0006968	cellular defense response	26	-0.691426	-1.41456	0.0716612	0.460043	0.423109	717	tags=38%, list=6%, signal=36%	ADORA2A/ITGB1/LSP1/C5AR1/PTK2B/RAB23/CCR9/BCL10/CCR6/LBP
BP	GO:0050867	positive regulation of cell activation	223	-0.47901	-1.27953	0.0717029	0.460043	0.423109	1514	tags=21%, list=12%, signal=18%	HLX/SH3KBP1/CSK/PLA2G4A/AIF1/TIRAP/ITPKB/BTK/RUNX3/MALT1/GRAP2/CLEC4D/CTSC/BLOC1S3/GATA2/ATP11C/HLA-DPB1/TGFBR2/IGF2/PIK3R1/GATA3/ITGAM/PIK3R6/BCL10/TNFSF13B/LYN/SIRPA/BCL6/TMIGD2/DUSP10/PDPK1/TESPA1/PLA2G3/MMP14/IGLL1/CD209/HLA-DPA1/HES1/CD276/MPL/CAV1/SOX4/WNT5A/EPO/PRKCZ/LBP
BP	GO:0006665	sphingolipid metabolic process	133	-0.519651	-1.31444	0.0717241	0.460043	0.423109	2096	tags=26%, list=16%, signal=22%	ST3GAL5/TEX2/PRKCD/FUT5/PLPP3/UGT8/B4GALT3/KDSR/ESYT3/SERINC5/CTSA/HEXB/CERS2/BAX/GLA/SMPD3/ST6GALNAC6/HACD2/CYP4F22/B3GALT4/CERK/ORMDL3/B4GALT5/PLPP2/GM2A/PSAP/PPT1/CERS6/ASAH2/ACER2/CERKL/PLA2G15/ARSA/ST8SIA2/GLB1
MF	GO:0008028	monocarboxylic acid transmembrane transporter activity	49	-0.625363	-1.40089	0.0717557	0.460043	0.423109	233	tags=20%, list=2%, signal=20%	SLC17A6/SLC27A2/SLC16A7/ABCG2/SLC9A3R1/SLC6A6/ABCB11/SLC10A1/SLC10A2/SLC16A12
BP	GO:0051057	positive regulation of small GTPase mediated signal transduction	66	-0.606846	-1.40221	0.0718563	0.460043	0.423109	2249	tags=30%, list=18%, signal=25%	SYNPO2L/PIK3CG/F2R/KRAS/LPAR4/NET1/SRC/RTN4R/ITPKB/EPOR/F11R/APOA1/ARRB1/LYN/GPR18/GPR4/NTRK1/KITLG/EPO/CSF1
BP	GO:0033032	regulation of myeloid cell apoptotic process	20	-0.726181	-1.4214	0.0719064	0.460043	0.423109	2003	tags=40%, list=16%, signal=34%	APOH/ANXA1/GHSR/SIRT1/MAEA/ITPKB/KITLG/EPO
MF	GO:0008373	sialyltransferase activity	16	-0.756937	-1.41027	0.0719298	0.460043	0.423109	1273	tags=38%, list=10%, signal=34%	ST6GALNAC2/ST3GAL5/ST6GALNAC6/ST6GAL2/ST3GAL4/ST8SIA2
BP	GO:0097503	sialylation	16	-0.756937	-1.41027	0.0719298	0.460043	0.423109	1273	tags=38%, list=10%, signal=34%	ST6GALNAC2/ST3GAL5/ST6GALNAC6/ST6GAL2/ST3GAL4/ST8SIA2
BP	GO:0031062	positive regulation of histone methylation	30	0.634213	1.46278	0.072	0.460043	0.423109	1177	tags=13%, list=9%, signal=12%	GCG/KMT2A/RIF1/PAXBP1
MF	GO:0042809	vitamin D receptor binding	15	0.718317	1.41218	0.072093	0.460043	0.423109	852	tags=20%, list=7%, signal=19%	MED16/MED1/TAF7
BP	GO:0045176	apical protein localization	15	0.718602	1.41274	0.072093	0.460043	0.423109	4	tags=7%, list=0%, signal=7%	MAL
MF	GO:0016878	acid-thiol ligase activity	21	-0.720928	-1.41695	0.0722496	0.460043	0.423109	162	tags=24%, list=1%, signal=24%	SLC27A2/SLC27A6/AACS/ACSL5/ACSS2
BP	GO:0021697	cerebellar cortex formation	21	-0.718696	-1.41257	0.0722496	0.460043	0.423109	1714	tags=29%, list=13%, signal=25%	CBLN1/CDK5/DLL1/RORA/LHX1/MAP2K1
MF	GO:0001098	basal transcription machinery binding	50	0.538991	1.37108	0.0722543	0.460043	0.423109	1876	tags=24%, list=15%, signal=21%	AGO1/DHX9/ESR1/DRAP1/TAF7/FBL/SCAF1/LLPH/NCOA3/HNRNPU/RUVBL2/ESRRB
MF	GO:0001099	basal RNA polymerase II transcription machinery binding	50	0.538991	1.37108	0.0722543	0.460043	0.423109	1876	tags=24%, list=15%, signal=21%	AGO1/DHX9/ESR1/DRAP1/TAF7/FBL/SCAF1/LLPH/NCOA3/HNRNPU/RUVBL2/ESRRB
BP	GO:0072348	sulfur compound transport	42	-0.636045	-1.40225	0.0723077	0.460043	0.423109	1291	tags=19%, list=10%, signal=17%	ABCG2/SLC1A4/SLC9A3R1/LRRC8C/SLC7A9/SLC25A30/SLC6A6/SLC13A4
BP	GO:0090181	regulation of cholesterol metabolic process	54	-0.625061	-1.40635	0.0723077	0.460043	0.423109	879	tags=37%, list=7%, signal=35%	FDFT1/SREBF1/GPAM/FGF1/ERLIN1/SEC14L2/SOD1/APOB/FASN/FMO5/CYP51A1/HMGCR/TM7SF2/APOE/LSS/IDI1/DHCR7/DGAT2/SQLE/SC5D
MF	GO:0032182	ubiquitin-like protein binding	89	0.467208	1.31061	0.0723717	0.460043	0.423109	2238	tags=27%, list=18%, signal=22%	PLAA/CASP8AP2/RAD23B/HABP4/NSFL1C/NPLOC4/USP5/FBXW7/ADRM1/DDI2/DCUN1D5/RAD23A/CUEDC1/FAF1/MDM2/USP16/UBXN1/ZFAND2B/ASCC2/TAB2/FAF2/USPL1/DCUN1D2/UCHL3
BP	GO:0090130	tissue migration	261	-0.465628	-1.25642	0.0725	0.460043	0.423109	2406	tags=28%, list=19%, signal=23%	RIN2/EPB41L5/PLCG2/CORO1C/EVL/RHOB/GRN/FOXP1/ARF6/TMSB4X/PXN/PIK3CG/HMOX1/MAP2K5/PPARG/RAB25/APOH/PLPP3/FGF1/ABL1/ANGPT4/PIK3R3/ANXA1/CD40/SRC/WDPCP/SIRT1/CARD10/PTK2B/PTP4A3/PKN1/DAB2IP/HBEGF/ARSB/FAP/TACSTD2/CTSH/EPPK1/AGT/PRCP/SEMA3A/PTN/APOA1/EMP2/GATA2/FSTL1/ZC3H12A/TGFBR2/VEGFC/GATA3/DLL4/FGF8/PLK2/ETS1/SPARC/GADD45A/ANGPT1/DUSP10/EFNA1/PDPK1/RGCC/ANGPT2/PBLD/APOE/MMRN2/FOXF1/LGMN/NRP1/SOX9…
BP	GO:0046395	carboxylic acid catabolic process	206	-0.485237	-1.28931	0.0725389	0.460043	0.423109	1806	tags=22%, list=14%, signal=19%	AGXT/GNPDA1/PCK1/CRYM/IDO2/LPIN1/ASPA/PAH/DDO/SLC27A2/RENBP/GPT/TAT/DDAH2/ALDH4A1/PCBD1/GAD1/ACOT8/BCKDK/CRABP1/GOT2/GCSH/HSD17B4/HAL/ASRGL1/HAAO/AMDHD1/GSTZ1/ACMSD/EHHADH/NPL/SORD/PEX2/ALDH8A1/PRODH/UROC1/CDO1/PON3/IL4I1/ABCB11/PLA2G15/AMDHD2/QDPR/PECR/CSAD
BP	GO:0030949	positive regulation of vascular endothelial growth factor receptor signaling pathway	11	0.779173	1.43366	0.0725624	0.460043	0.423109	379	tags=18%, list=3%, signal=18%	IL1B/ARNT
BP	GO:0008203	cholesterol metabolic process	121	-0.533514	-1.33058	0.0726257	0.460043	0.423109	1594	tags=24%, list=13%, signal=21%	APOA4/EBP/SEC14L2/SOD1/VLDLR/DHCR24/CYB5R3/APOA1/APOB/FASN/FMO5/CYP51A1/CYP46A1/HMGCR/CYP27A1/TM7SF2/APOE/ACLY/LSS/NR0B2/MSMO1/IDI1/HSD17B7/DHCR7/LCAT/DGAT2/SQLE/SC5D/CYP3A4
BP	GO:1905517	macrophage migration	39	-0.650009	-1.42114	0.072643	0.460043	0.423109	1732	tags=36%, list=14%, signal=31%	C5AR1/PTK2B/CSF1R/P2RY12/TRIM55/CKLF/AKIRIN1/CD200/CMKLR1/CD200R1/MMP14/MST1/SFTPD/CSF1
BP	GO:0032481	positive regulation of type I interferon production	60	0.516469	1.36196	0.0726744	0.460043	0.423109	1456	tags=15%, list=11%, signal=13%	HSPD1/HSP90AA1/NFKB1/IRAK1/DHX9/CRCP/DHX33/RIOK3/IRF7
MF	GO:0030414	peptidase inhibitor activity	98	-0.556681	-1.3586	0.0729614	0.461246	0.424215	1682	tags=28%, list=13%, signal=24%	SPINT1/A2ML1/SPOCK2/CST3/RENBP/COL28A1/C4B/AGT/DPEP1/LXN/BIN1/ITIH2/GAPDH/SERPINA10/CRB2/ITIH5/SERPINA1/LTF/A2M/SERPIND1/SERPING1/SERPINH1/WFDC1/PZP/AMBP/ANOS1/AHSG
BP	GO:1902474	positive regulation of protein localization to synapse	11	-0.802005	-1.41265	0.0730838	0.461246	0.424215	1123	tags=27%, list=9%, signal=25%	NLGN2/STX7/WNT5A
CC	GO:0030669	clathrin-coated endocytic vesicle membrane	27	-0.68575	-1.40832	0.0731707	0.461246	0.424215	1457	tags=37%, list=11%, signal=33%	HBEGF/FCGR1A/HLA-DPB1/APOB/CD9/FZD2/FZD4/APOE/HLA-DPA1/WNT5A
MF	GO:0005520	insulin-like growth factor binding	19	-0.735424	-1.42523	0.0732113	0.461246	0.424215	132	tags=37%, list=1%, signal=37%	ITGA6/IGFBP3/IGFBP4/IGF1R/HTRA3/IGFALS/HTRA1
CC	GO:0005881	cytoplasmic microtubule	57	0.519401	1.37264	0.0732394	0.461246	0.424215	680	tags=19%, list=5%, signal=18%	MAPRE1/DYNC1H1/APC/ARFGEF2/TMEM214/REEP2/REEP3/SRPRB/TTC30B/TUBA1A/MAPRE2
BP	GO:1900407	regulation of cellular response to oxidative stress	57	0.517799	1.3684	0.0732394	0.461246	0.424215	1161	tags=19%, list=9%, signal=18%	INS/IL10/OXR1/TSC1/LRRK2/FBXW7/ABCD1/TRAP1/BAG5/NR4A3/PYCR1
BP	GO:0006570	tyrosine metabolic process	12	-0.797659	-1.42716	0.0734266	0.461637	0.424575	2197	tags=58%, list=17%, signal=48%	THAP4/HGD/PAH/TAT/IYD/GSTZ1/TYR
BP	GO:1902306	negative regulation of sodium ion transmembrane transport	12	-0.797288	-1.4265	0.0734266	0.461637	0.424575	1306	tags=42%, list=10%, signal=37%	COMMD1/HECW1/SLC9A3R1/NEDD4L/ATP1A2
BP	GO:0006085	acetyl-CoA biosynthetic process	20	-0.722997	-1.41517	0.0735786	0.461784	0.42471	504	tags=25%, list=4%, signal=24%	PPCS/PDK1/GSTZ1/ACLY/ACSS2
BP	GO:0046339	diacylglycerol metabolic process	20	-0.723172	-1.41551	0.0735786	0.461784	0.42471	252	tags=40%, list=2%, signal=39%	PNPLA2/GPAM/GPAT4/MOGAT2/AVIL/DGAT2/DGKG/PLA2G15
MF	GO:0004866	endopeptidase inhibitor activity	93	-0.560731	-1.34692	0.0736377	0.461784	0.42471	1682	tags=29%, list=13%, signal=25%	SPINT1/A2ML1/SPOCK2/CST3/RENBP/COL28A1/C4B/AGT/DPEP1/LXN/BIN1/ITIH2/GAPDH/SERPINA10/CRB2/ITIH5/SERPINA1/LTF/A2M/SERPIND1/SERPING1/SERPINH1/WFDC1/PZP/AMBP/ANOS1/AHSG
BP	GO:1903363	negative regulation of cellular protein catabolic process	63	0.502908	1.34272	0.0737463	0.462073	0.424975	990	tags=19%, list=8%, signal=18%	RIC1/SGTA/ANXA2/RPL5/USP7/KLHL40/ALAD/USP14/FURIN/CDK5RAP3/BAG5/N4BP1
CC	GO:0035097	histone methyltransferase complex	61	0.515192	1.36082	0.0739645	0.463047	0.425871	2584	tags=33%, list=20%, signal=26%	HCFC2/PELP1/KMT2A/SETD1A/TAF7/PRPF31/SETD1B/MGA/RBBP4/HCFC1/KMT2B/RUVBL2/TEX10/E2F6/TRIM37/PRMT5/KMT2D/CHD8/INO80C/PHF20
MF	GO:0016811	hydrolase activity, acting on carbon-nitrogen (but not peptide) bonds, in linear amides	51	-0.623215	-1.40078	0.0746951	0.466983	0.429492	1650	tags=24%, list=13%, signal=21%	SIRT1/ASPA/HDAC11/FAAH2/AGA/ASRGL1/PM20D1/PGLYRP1/ASAH2/ACER2/AMDHD2/PIGL
BP	GO:0060562	epithelial tube morphogenesis	268	-0.463353	-1.25184	0.0747198	0.466983	0.429492	2382	tags=28%, list=19%, signal=23%	CCDC39/FZD3/RASIP1/SUFU/RHOB/FOXP1/DAG1/MTHFD1L/WNK4/YAP1/PBX1/NOG/MTHFD1/KDM2B/KRAS/IFT172/FGF1/WNT2B/ABL1/BMP7/ST14/EOMES/IRX2/AHI1/KIF26B/SRC/CXCR4/GATA4/SPINT1/RALA/SOX11/WT1/TBX20/SMAD3/NODAL/HAND2/BMP5/CSF1R/PKD2/TACSTD2/CTSH/DLL1/NFATC4/AGT/CELSR1/HESX1/EDNRA/TGFBR2/GATA3/LGR5/DLL4/FGF8/FZD2/NRARP/PPP1CA/BCL10/CXCL10/SFRP2/EPHA4/DDR1/MMP14/CITED1/PGR/SALL4/NDRG4/HES1/FOXF1/NRP1/SOX9/SOX4/W…
BP	GO:1901160	primary amino compound metabolic process	11	0.777201	1.43003	0.0748299	0.467243	0.429731	936	tags=18%, list=7%, signal=17%	TPH1/DDC
CC	GO:0030688	preribosome, small subunit precursor	14	0.735428	1.42947	0.0749415	0.467243	0.429731	2603	tags=57%, list=20%, signal=45%	RIOK1/NOP14/RIOK3/BYSL/LTV1/UTP20/FTSJ3/RRP1
BP	GO:1902882	regulation of response to oxidative stress	62	0.506123	1.34502	0.0749513	0.467243	0.429731	1161	tags=18%, list=9%, signal=16%	INS/IL10/OXR1/TSC1/LRRK2/FBXW7/ABCD1/TRAP1/BAG5/NR4A3/PYCR1
BP	GO:0032410	negative regulation of transporter activity	56	-0.617471	-1.39646	0.0750383	0.46739	0.429866	2004	tags=34%, list=16%, signal=29%	CAB39/FKBP1B/SLC6A9/TCAF2/KCNE4/TLR9/TRDN/SUMO1/PKD2/HECW1/RRAD/SLC9A3R1/KCNAB1/ACTN2/NEDD4L/NDFIP1/ATP1A2/CAV1/EPO
BP	GO:0006360	transcription by RNA polymerase I	53	0.52929	1.36719	0.0751445	0.467452	0.429923	2858	tags=43%, list=22%, signal=34%	TAF1C/CCNH/RRN3/HEATR1/MNAT1/ERCC6/SMARCA4/NCL/DHX33/SIRT7/FLNA/PWP1/GTF2H3/TTF1/POLR1C/POLR1A/GTF2H5/ERCC2/SMARCB1/POLR1B/WDR75/UTP15/POLR1E
BP	GO:0040019	positive regulation of embryonic development	12	-0.791989	-1.41702	0.0751748	0.467452	0.429923	1144	tags=25%, list=9%, signal=23%	PLCB1/B4GALT5/LHX1
BP	GO:0048538	thymus development	41	-0.635753	-1.39898	0.0753846	0.467526	0.429991	2575	tags=37%, list=20%, signal=29%	SIX1/CRKL/SHH/PBX1/ABL1/TBX1/MAFB/EPHB3/SOD1/HAND2/GATA3/SLC46A2/HES1/TYR/MAP2K1
BP	GO:0071027	nuclear RNA surveillance	13	0.753473	1.43355	0.0754717	0.467526	0.429991	801	tags=15%, list=6%, signal=14%	XRN1/EXOSC6
BP	GO:0071028	nuclear mRNA surveillance	13	0.753473	1.43355	0.0754717	0.467526	0.429991	801	tags=15%, list=6%, signal=14%	XRN1/EXOSC6
BP	GO:0006851	mitochondrial calcium ion transmembrane transport	22	0.660929	1.43081	0.0755668	0.467526	0.429991	1763	tags=32%, list=14%, signal=27%	PMPCB/OPA1/SLC8B1/SPG7/PHB2/PMPCA/MICU3
CC	GO:0030140	trans-Golgi network transport vesicle	25	0.636924	1.42514	0.0755668	0.467526	0.429991	2468	tags=60%, list=19%, signal=48%	CLTB/TMED10/AP1G2/RAB27B/FURIN/CLTC/SYNRG/TMED9/RAB14/AP2A1/AP1G1/STEAP2/RASSF9/TGOLN2/ATP7A
BP	GO:0140448	signaling receptor ligand precursor processing	25	0.637946	1.42743	0.0755668	0.467526	0.429991	25	tags=12%, list=0%, signal=12%	PCSK2/PCSK1/SCG5
BP	GO:0001817	regulation of cytokine production	455	-0.436472	-1.22267	0.0759494	0.469499	0.431806	2187	tags=25%, list=17%, signal=22%	IL17RC/IL5RA/MEFV/SMAD7/TMSB4X/IL1R2/STAT6/HMOX1/SERPINE1/SASH3/MAP2K5/ATP6AP2/LAPTM4B/F2R/PDCD4/ORM1/TLR9/GPAM/TNFRSF14/ABL1/TLR1/ANXA1/TNFRSF1B/PTGER4/ADCYAP1/CD40/GHSR/C5AR1/GATA4/NLRX1/BTN3A3/MERTK/PTPRS/SLAMF6/YY1/SOD1/CSK/POU2F2/SMAD3/CARD9/NODAL/PARK7/CSF1R/POLR3K/AIF1/TIRAP/C1QTNF3/F2/TAX1BP1/BTK/HOMER3/CRP/FN1/SEMA7A/DLL1/NFATC4/AGT/MALT1/PLCB1/F11R/CRTAM/IL17RA/BPI/CD84/APOA1/EIF2AK3/ZC…
BP	GO:1902473	regulation of protein localization to synapse	25	-0.693307	-1.40213	0.0760331	0.469563	0.431865	1757	tags=28%, list=14%, signal=24%	GPC6/GHSR/ADAM10/NLGN2/STX7/WNT5A/PRKCZ
BP	GO:1901605	alpha-amino acid metabolic process	158	-0.504282	-1.30683	0.076087	0.469563	0.431865	1601	tags=23%, list=13%, signal=21%	ASPA/SERINC5/PAH/DDO/PARK7/GPT/TAT/DDAH2/ALDH4A1/PCBD1/GAD1/GOT2/DPEP1/CLN3/GGT1/GCSH/NOX4/IYD/CPS1/HAL/ASRGL1/HAAO/ACCS/AMDHD1/GSTZ1/ACMSD/ALDH8A1/ART4/PRODH/UROC1/CDO1/TYR/IL4I1/BHMT/NAGS/QDPR/CSAD
BP	GO:0090132	epithelium migration	258	-0.463258	-1.24992	0.0761548	0.469589	0.431889	2406	tags=28%, list=19%, signal=23%	RIN2/EPB41L5/PLCG2/CORO1C/EVL/RHOB/GRN/FOXP1/ARF6/TMSB4X/PXN/PIK3CG/HMOX1/MAP2K5/PPARG/RAB25/APOH/PLPP3/FGF1/ABL1/ANGPT4/PIK3R3/ANXA1/CD40/SRC/WDPCP/SIRT1/CARD10/PTK2B/PTP4A3/PKN1/DAB2IP/HBEGF/ARSB/FAP/TACSTD2/CTSH/EPPK1/AGT/PRCP/SEMA3A/PTN/APOA1/EMP2/GATA2/FSTL1/ZC3H12A/TGFBR2/VEGFC/GATA3/DLL4/FGF8/PLK2/ETS1/SPARC/GADD45A/ANGPT1/DUSP10/EFNA1/PDPK1/RGCC/ANGPT2/PBLD/APOE/MMRN2/LGMN/NRP1/SOX9/ITGA2…
BP	GO:0006525	arginine metabolic process	17	0.705938	1.43362	0.0763547	0.470122	0.432379	415	tags=24%, list=3%, signal=23%	OTC/ARG2/ATP2B4/ASL
MF	GO:0030674	protein-macromolecule adaptor activity	230	-0.471264	-1.26447	0.0764411	0.470122	0.432379	2012	tags=18%, list=16%, signal=16%	GATAD2A/TRDN/HSPA8/BLNK/AP1M1/VAMP1/NEFH/DEDD2/CARD10/PDZK1/RAPSN/DAB2IP/CBX5/TIRAP/FRS2/VTI1A/SLC9A3R1/SLC4A1/HIP1R/GRB14/RGS14/STX1B/MAVS/PIK3R1/ARRB1/FSCN1/VAMP3/STX7/TRAF2/BICD1/SPSB1/BFAR/GAS2/EPS8/COL11A1/CAV2/COL1A2/STX2/CAV1/SLC9A3R2/MAP2K1/COL8A2
MF	GO:0003777	microtubule motor activity	54	0.538795	1.39984	0.0764544	0.470122	0.432379	2053	tags=24%, list=16%, signal=20%	DYNC1H1/DNHD1/KIF27/KIF3A/KIF20B/DNAI2/KIF5A/SMC3/DNAH2/KIF16B/DNAH11/KIF21B/KIF13B
BP	GO:0062207	regulation of pattern recognition receptor signaling pathway	67	-0.601334	-1.39531	0.0765766	0.470122	0.432379	1995	tags=30%, list=16%, signal=25%	TLR9/TLR1/TYRO3/LRRC14/NLRX1/PTPRS/DAB2IP/TIRAP/TKFC/CYBA/DHX58/LYN/SLC46A2/LTF/PDPK1/TLR3/TLR5/CAV1/SLC15A2/LBP
CC	GO:0043292	contractile fiber	190	-0.489561	-1.2917	0.0766234	0.470122	0.432379	1803	tags=23%, list=14%, signal=20%	MYH7/C10orf71/MYH6/TNNI1/MYL2/MYL1/TNNT1/SLC2A1/MYL4/CACNA1S/TNNT2/CACNA1D/FBXO32/HRC/PPP1R12A/SLC8A1/TMOD4/SLC4A1/TMOD3/CASQ1/BIN1/TPM3/ALDOA/MYOM2/TTN/SCN8A/IGFN1/ACTN2/TRIM54/KAT2B/MYH1/TNNC2/MYH3/TMOD1/MYBPC1/MYOZ1/TWF2/TNNT3/MYLPF/MYH2/PGM5/TNNI2/CALD1/MMP2
BP	GO:0043588	skin development	190	-0.488433	-1.28872	0.0766234	0.470122	0.432379	2505	tags=25%, list=20%, signal=20%	SHH/ARRDC3/TMEM79/IGFBP5/CBFB/ZFP36L1/KRT18/FZD3/SUFU/KRT19/YAP1/CTSK/DSG2/ST14/KAZN/ANXA1/FRAS1/GNAS/ITGA6/ADAMTS2/DSP/TCF15/DACT2/TNFRSF19/DHCR24/DLL1/TGM5/CYP27B1/WNT10B/PPHLN1/LGR5/ALOX15B/SOX21/PDGFA/COL1A1/ERRFI1/INTU/COL1A2/ABCA12/SOX9/DSC1/ITGA2/CTSV/PERP/WNT5A/SOSTDC1/MAP2K1
BP	GO:0052126	movement in host environment	124	-0.527913	-1.32069	0.0767085	0.470136	0.432392	2006	tags=28%, list=16%, signal=24%	HYAL3/TRIM13/MOG/CLEC4M/FUCA2/HYAL2/VPS4B/VPS18/EFNB2/EXOC7/DAG1/ITGB1/TNFRSF14/EPS15/TRIM11/TYRO3/CDH1/CHMP2A/SRC/CXCR4/TRIM8/TRIM35/SLC1A5/CXADR/F11R/ANPEP/GSN/IFITM3/TMPRSS4/CD209/CAV2/NRP1/ITGA2/CAV1/SLC10A1
BP	GO:0002328	pro-B cell differentiation	12	-0.788149	-1.41015	0.0769231	0.470136	0.432392	1256	tags=33%, list=10%, signal=30%	FLCN/HES1/FLT3/SOX4
MF	GO:0019905	syntaxin binding	70	0.481641	1.30585	0.0769231	0.470136	0.432392	1396	tags=24%, list=11%, signal=22%	CPLX4/CPLX3/TMED10/STXBP5L/LRRK2/SCFD2/SCFD1/CPLX2/SEC22B/UNC13A/SYT3/NSF/GOLGA2/NAPG/TMED9/SYT9/VPS54
BP	GO:0098581	detection of external biotic stimulus	12	-0.785504	-1.40542	0.0769231	0.470136	0.432392	505	tags=25%, list=4%, signal=24%	C4B/PGLYRP1/LBP
BP	GO:0031334	positive regulation of protein-containing complex assembly	193	0.402617	1.23798	0.0770847	0.470136	0.432392	1555	tags=16%, list=12%, signal=14%	PSMC4/MAPRE1/PSMC3/PSMC5/PSMC2/HSP90AA1/WASF3/CDC42EP2/LGALS3/PSMC6/VCP/EIF4G1/ARFIP2/ESR1/AKAP9/DCTN1/ARPC5/LMOD1/TFRC/TRABD2B/ATR/CCR7/CLIP1/ARPC1A/DHX33/CDK5RAP2/RBX1/AP1AR/FAF1/TENM1
CC	GO:0016324	apical plasma membrane	269	-0.461356	-1.2478	0.0771144	0.470136	0.432392	1302	tags=30%, list=10%, signal=28%	CPO/KCNA1/SLC7A8/CTSK/ZMYND10/ATP6AP2/PLD1/KCNE4/TLR9/DSG2/SLC22A5/EPS15/SLC44A4/ANXA1/IGSF5/ABCC5/GNAS/AQP10/MGAM/CTSB/ENPEP/WDPCP/SLC52A3/OTOA/PDZK1/SLC2A1/SLC34A2/PTH1R/ABCG2/PFKM/SLC29A1/FN1/SLC3A2/ADGRG2/DLL1/PTPRH/SLC9A3R1/ADCY8/RAB27A/DPEP1/USH2A/ATP8B1/HIP1R/STK26/EMP2/RAB17/NOX4/CFAP126/S100G/CRB2/VAMP3/SLC7A9/CDH2/CEACAM5/GM2A/HPN/SLC2A2/EZR/SAPCD2/MYO7A/AMN/PARD6A/ABCB1/OCLN/MAL2/CDHR2…
BP	GO:0033189	response to vitamin A	16	-0.752331	-1.40169	0.077193	0.470136	0.432392	787	tags=31%, list=6%, signal=29%	PPARG/GATA4/LRAT/EPO/CYP1A1
BP	GO:1903036	positive regulation of response to wounding	57	-0.615867	-1.39119	0.0772798	0.470136	0.432392	2605	tags=35%, list=20%, signal=28%	CLDN4/FKBP1B/MYLK/CPB2/SERPINF2/GRN/SERPINE1/F2R/ITGB1/APOH/PLPP3/ANXA1/CXCR4/HBEGF/F2/PTN/OCLN/PLG/ST3GAL4/CLDN3
BP	GO:0060443	mammary gland morphogenesis	34	-0.660876	-1.39929	0.0772871	0.470136	0.432392	894	tags=29%, list=7%, signal=27%	BAX/CSF1R/TGFBR2/DDR1/PGR/ELF3/CAV1/WNT5A/SOSTDC1/CSF1
BP	GO:0051569	regulation of histone H3-K4 methylation	26	0.639283	1.43417	0.0773196	0.470136	0.432392	346	tags=8%, list=3%, signal=7%	GCG/KMT2A
CC	GO:0000151	ubiquitin ligase complex	241	0.385995	1.20933	0.0773847	0.470136	0.432392	1072	tags=7%, list=8%, signal=7%	KLHL8/DERL2/SEL1L/DERL1/SYVN1/PDCD6/ANAPC4/MED1/MED11/FBXW7/KLHL40/DCUN1D5/FBXO38/DCAF7/PCGF1/FBXL6/GAN
BP	GO:0061333	renal tubule morphogenesis	64	-0.601935	-1.38093	0.07739	0.470136	0.432392	2575	tags=34%, list=20%, signal=28%	SIX1/SHH/NPNT/WNK4/PBX1/NOG/FGF1/WNT2B/IRX2/AHI1/KIF26B/WT1/PKD2/TACSTD2/AGT/GATA3/LGR5/FGF8/CITED1/HES1/SOX9/LHX1
BP	GO:0071677	positive regulation of mononuclear cell migration	40	-0.640059	-1.40464	0.0775194	0.470409	0.432642	804	tags=40%, list=6%, signal=38%	MOSPD2/CCL20/SERPINE1/TNFRSF14/ADAM10/PTK2B/JAM2/AIF1/FPR2/CXCL12/CXCL10/LGMN/S100A14/WNT5A/CXCL14/CCR6
BP	GO:0006022	aminoglycan metabolic process	135	-0.516396	-1.30651	0.0775623	0.470409	0.432642	936	tags=27%, list=7%, signal=26%	B4GALT3/ABCC5/GPC6/CHST6/B4GALT1/GUSB/SPOCK2/HEXB/HS3ST3A1/ARSB/CHST15/SMPD3/NCAN/GNS/CHPF2/ITIH2/B4GALT5/VCAN/ITIH5/ANGPT1/IDS/CTBS/CHP1/NDNF/PGLYRP1/NDST4/SGSH/PRELP/HGF/ST3GAL4/HPSE2/CHIA/SPAM1/GLB1/CSPG5/DCN/LUM
BP	GO:0061311	cell surface receptor signaling pathway involved in heart development	25	-0.691673	-1.39882	0.077686	0.470455	0.432685	771	tags=28%, list=6%, signal=26%	SNAI2/NOG/HAND2/DLL4/ALPK2/WNT5A/MSX1
BP	GO:0046883	regulation of hormone secretion	211	0.393358	1.21699	0.0778345	0.470455	0.432685	537	tags=8%, list=4%, signal=7%	RFX6/INS/SCG5/GCG/NMB/MIDN/IL1B/CFTR/GJA1/LIF/PDX1/ABCC8/STXBP5L/ADCY5/SLC8B1/RFX3
CC	GO:0032592	integral component of mitochondrial membrane	66	0.499406	1.34223	0.0778443	0.470455	0.432685	1580	tags=21%, list=12%, signal=19%	ADCK1/HSPA9/DNAJC11/SLC8B1/COA3/COX18/IMMT/L2HGDH/TOMM20/TMEM177/GHITM/COX11/ABCB6/SAMM50
BP	GO:0048588	developmental cell growth	190	-0.486368	-1.28327	0.0779221	0.470455	0.432685	1707	tags=17%, list=13%, signal=15%	CXCR4/RTN4R/GATA4/CDH4/PTPRS/YY1/CDK5/LPAR3/FN1/SEMA7A/SEMA3A/PLXNA4/TGFBR2/SHTN1/SEMA3D/MAP2/CDKL5/CXCL12/FGF13/DSCAM/SEMA3C/ALCAM/NEDD4L/DDR1/APOE/TWF2/NRP1/SOX9/SYT4/WNT5A/PRKCZ/POSTN
BP	GO:0071398	cellular response to fatty acid	28	-0.672877	-1.38537	0.0780488	0.470455	0.432685	2837	tags=46%, list=22%, signal=36%	NR1H4/LPL/NME2/PPARGC1A/SREBF1/SRC/CCNB1/NFATC4/E2F1/ZC3H12A/CPS1/PID1/DGAT2
BP	GO:0010632	regulation of epithelial cell migration	200	-0.483159	-1.27724	0.078125	0.470455	0.432685	2406	tags=32%, list=19%, signal=26%	RIN2/EPB41L5/PLCG2/CORO1C/EVL/RHOB/GRN/FOXP1/ARF6/TMSB4X/PIK3CG/HMOX1/MAP2K5/PPARG/RAB25/APOH/PLPP3/FGF1/ABL1/ANGPT4/ANXA1/CD40/SRC/SIRT1/CARD10/PTK2B/DAB2IP/HBEGF/ARSB/TACSTD2/CTSH/EPPK1/AGT/PRCP/SEMA3A/PTN/EMP2/GATA2/ZC3H12A/TGFBR2/VEGFC/GATA3/DLL4/PLK2/ETS1/SPARC/GADD45A/ANGPT1/DUSP10/EFNA1/PDPK1/RGCC/ANGPT2/PBLD/APOE/MMRN2/LGMN/NRP1/SOX9/ITGA2/WNT5A/DCN/CCR6
BP	GO:0006658	phosphatidylserine metabolic process	23	-0.702907	-1.40063	0.078203	0.470455	0.432685	2259	tags=39%, list=18%, signal=32%	MBOAT2/PLA2G1B/PTDSS1/SERINC5/PLA2G4A/PLA1A/PLA2G3/PLA2G15/LPCAT4
BP	GO:0050890	cognition	220	-0.475406	-1.26641	0.0783055	0.470455	0.432685	1742	tags=20%, list=14%, signal=18%	GHSR/C5AR1/ADORA1/SOBP/PRKAR2B/ATXN1/CDK5/JUN/KALRN/GRIN2B/EN1/VLDLR/FAM107A/SLC8A3/NFATC4/PIAS1/SLC1A4/PLCB1/ADCY1/ADCY8/CLN3/PTN/RGS14/BRINP1/FGF13/ADGRB3/PLK2/GM2A/GRPR/C12orf57/APOE/NTRK1/PPP1R1B/NDRG4/ATP1A2/MGAT3/PTPRZ1/ST3GAL4/LGMN/NTF3/RIC8A/PRKCZ/BCHE/GATM/MUSK
BP	GO:0031639	plasminogen activation	18	-0.731567	-1.40683	0.0783333	0.470455	0.432685	853	tags=39%, list=7%, signal=36%	CPB2/SERPINF2/SERPINE1/APOH/PLAU/HPN/F11
BP	GO:0045672	positive regulation of osteoclast differentiation	18	-0.734122	-1.41175	0.0783333	0.470455	0.432685	1122	tags=33%, list=9%, signal=30%	TNFSF11/GNAS/GPR68/OCSTAMP/CA2/CSF1
BP	GO:0042492	gamma-delta T cell differentiation	11	-0.792201	-1.39538	0.0784314	0.470455	0.432685	717	tags=45%, list=6%, signal=43%	STAT5B/SYK/NCKAP1L/CCR9/SOX4
BP	GO:0097152	mesenchymal cell apoptotic process	11	-0.794295	-1.39907	0.0784314	0.470455	0.432685	430	tags=45%, list=3%, signal=44%	BMP7/TBX1/HOXA13/SOX9/MSX1
BP	GO:0060538	skeletal muscle organ development	123	-0.527638	-1.3166	0.0785414	0.470455	0.432685	1904	tags=22%, list=15%, signal=19%	TBX1/NPHS1/MEGF10/ASB2/SOX11/HLX/CDK5/WT1/CFLAR/DLL1/WNT10B/HMG20B/CASQ1/MYOM2/IGF2/POPDC3/ELN/AKIRIN1/EEF2/MAPK14/KCNAB1/PAX5/CAV2/MYOZ1/MYLPF/CAV1/DCN
BP	GO:0010453	regulation of cell fate commitment	20	-0.720946	-1.41116	0.0785953	0.470455	0.432685	1278	tags=35%, list=10%, signal=32%	SPDEF/FZD7/SFRP2/HES1/LOXL3/WNT5A/SOSTDC1
BP	GO:2000178	negative regulation of neural precursor cell proliferation	15	-0.759162	-1.39284	0.0786713	0.470455	0.432685	2035	tags=33%, list=16%, signal=28%	KDM2B/SPINT1/PTN/GATA2/WNT5A
BP	GO:0016075	rRNA catabolic process	16	0.711253	1.42636	0.0787037	0.470455	0.432685	801	tags=19%, list=6%, signal=18%	XRN1/DIS3L/EXOSC6
CC	GO:0005801	cis-Golgi network	38	0.599471	1.44957	0.078713	0.470455	0.432685	1549	tags=42%, list=12%, signal=37%	SLC10A7/TMED10/TRIP11/COPZ2/TRPC7/MAP6/SCFD1/AKAP9/KDELR2/GOLGB1/GOLGA2/SCYL1/LRPAP1/GBF1/HOOK3/SLC35C2
MF	GO:0042054	histone methyltransferase activity	48	0.535361	1.34688	0.0787172	0.470455	0.432685	1848	tags=29%, list=15%, signal=25%	KMT2A/SETD1A/PRDM16/PRMT1/FBL/PRMT7/SETDB2/SETD1B/SETD5/CARM1/KMT2B/PRMT2/SMYD1/ASH1L
BP	GO:0090322	regulation of superoxide metabolic process	22	-0.710743	-1.40426	0.0793388	0.472819	0.434859	2096	tags=41%, list=16%, signal=34%	PRKCD/BMP7/GNAI2/SOD1/CRP/FPR2/ITGAM/GCH1/PON3
BP	GO:1901879	regulation of protein depolymerization	66	-0.597764	-1.38123	0.0793413	0.472819	0.434859	1073	tags=23%, list=8%, signal=21%	TMOD4/TMOD3/TRIOBP/PDXP/SPTBN5/FGF13/GSN/SWAP70/ACTN2/TRIM54/EPS8/TMOD1/CAMSAP1/AVIL/TWF2
BP	GO:2000192	negative regulation of fatty acid transport	11	0.7723	1.42101	0.0793651	0.472819	0.434859	875	tags=27%, list=7%, signal=25%	PLA2R1/THBS1/GRM7
BP	GO:2001252	positive regulation of chromosome organization	138	0.421153	1.24596	0.0794997	0.472819	0.434859	1177	tags=13%, list=9%, signal=12%	GCG/IL1B/LIF/KMT2A/CCT3/LRRK2/CCT6A/CCT4/PRKCQ/TPR/RIF1/HNRNPD/ISL1/CCT8/ATR/SSBP1/SETDB2/PAXBP1
BP	GO:1902369	negative regulation of RNA catabolic process	54	0.521258	1.35427	0.0795455	0.472819	0.434859	1636	tags=28%, list=13%, signal=24%	IGF2BP1/VIP/NBAS/LRPPRC/DHX9/ELAVL1/LARP1/AXIN2/HNRNPD/NSUN2/SLIRP/LARP4B/HNRNPU/PKP1/ANGEL2
BP	GO:0035088	establishment or maintenance of apical/basal cell polarity	38	-0.644864	-1.40155	0.0795632	0.472819	0.434859	1386	tags=24%, list=11%, signal=21%	TCF15/PDZD11/SLC9A3R1/FSCN1/CRB2/LIN7A/FOXF1/MTCL1/WNT5A
BP	GO:0061245	establishment or maintenance of bipolar cell polarity	38	-0.644864	-1.40155	0.0795632	0.472819	0.434859	1386	tags=24%, list=11%, signal=21%	TCF15/PDZD11/SLC9A3R1/FSCN1/CRB2/LIN7A/FOXF1/MTCL1/WNT5A
BP	GO:0030730	sequestering of triglyceride	14	0.734271	1.42722	0.0796253	0.472819	0.434859	659	tags=29%, list=5%, signal=27%	IL1B/ABHD5/PLIN2/OSBPL11
BP	GO:0016486	peptide hormone processing	24	0.642922	1.43257	0.0798005	0.473479	0.435466	25	tags=12%, list=0%, signal=12%	PCSK2/PCSK1/SCG5
CC	GO:1990391	DNA repair complex	32	0.605386	1.41634	0.08	0.473647	0.435621	485	tags=6%, list=4%, signal=6%	ZSWIM7/RAD23B
BP	GO:0098656	anion transmembrane transport	423	-0.44034	-1.22925	0.0801394	0.473647	0.435621	951	tags=9%, list=7%, signal=9%	BLOC1S3/EDNRA/TAP1/LRRC8C/PIK3R1/MAPK14/TTYH3/SLC7A9/ANKH/CA2/SLC2A2/SORT1/SLC25A33/CLCN1/KLF15/CLCN2/PID1/PEX2/ABCB1/SLC7A2/OCLN/ATP1A2/SLC5A2/SLC37A4/SLC25A30/ABCA12/SLC6A6/SLC6A19/SLC13A5/SLC15A2/SLC6A7/SLC25A48/ACSL5/SLC15A1/SLC16A10/SLC6A18/SLC22A6/SLC16A12/SLC5A9/SLC13A4
MF	GO:0016505	peptidase activator activity involved in apoptotic process	13	0.74762	1.42242	0.0801887	0.473647	0.435621	1080	tags=31%, list=8%, signal=28%	MAL/CASP8AP2/NLRP12/NOD1
MF	GO:0004303	estradiol 17-beta-dehydrogenase activity	11	-0.790856	-1.39301	0.0802139	0.473647	0.435621	846	tags=45%, list=7%, signal=42%	HSD17B8/HSD17B12/HSD17B4/HSD17B7/RDH8
CC	GO:0034361	very-low-density lipoprotein particle	11	-0.791012	-1.39329	0.0802139	0.473647	0.435621	2003	tags=73%, list=16%, signal=61%	LPL/APOH/APOA4/VLDLR/APOA1/APOB/APOE/APOC2
CC	GO:0034385	triglyceride-rich plasma lipoprotein particle	11	-0.791012	-1.39329	0.0802139	0.473647	0.435621	2003	tags=73%, list=16%, signal=61%	LPL/APOH/APOA4/VLDLR/APOA1/APOB/APOE/APOC2
BP	GO:0002790	peptide secretion	309	0.371405	1.18915	0.0803288	0.473947	0.435896	785	tags=10%, list=6%, signal=9%	RFX6/INS/NAGPA/GCG/P3H1/MIDN/SEL1L/IL1B/CFTR/CPLX3/VIP/PREB/PDIA4/GJA1/TMED10/PDX1/ABCC8/OPRM1/CANX/COPG2/STXBP5L/ADCY5/PTPN23/SLC8B1/RFX3/DNAJC1/PORCN/PTPRN2/RAB11FIP2/HNF1B
MF	GO:0016896	exoribonuclease activity, producing 5'-phosphomonoesters	33	0.593326	1.38842	0.080429	0.474158	0.436091	2746	tags=39%, list=22%, signal=31%	XRN1/ERI2/DIS3L/DIS3L2/REXO2/ANGEL2/CNOT1/ANGEL1/EXOSC5/EXD2/PNPT1/EXOSC9/CNOT8
CC	GO:0030016	myofibril	186	-0.485588	-1.28012	0.0805195	0.474313	0.436233	1803	tags=23%, list=14%, signal=20%	MYH7/C10orf71/MYH6/TNNI1/MYL2/MYL1/TNNT1/SLC2A1/MYL4/CACNA1S/TNNT2/CACNA1D/FBXO32/HRC/PPP1R12A/SLC8A1/TMOD4/SLC4A1/TMOD3/CASQ1/BIN1/TPM3/ALDOA/MYOM2/TTN/SCN8A/IGFN1/ACTN2/TRIM54/KAT2B/MYH1/TNNC2/MYH3/TMOD1/MYBPC1/MYOZ1/TWF2/TNNT3/MYH2/PGM5/TNNI2/CALD1/MMP2
BP	GO:0046777	protein autophosphorylation	194	-0.485717	-1.28061	0.0806242	0.474551	0.436452	1485	tags=18%, list=12%, signal=16%	CDK5/CSK/EEF2K/PPP2R5D/CSF1R/ALK/BTK/IGF1R/NEK10/HCK/STK26/EIF2AK3/VEGFC/CDKL5/AATK/TEC/TEC/NEK2/LYN/PDPK1/RASSF2/CHP1/EPHA4/MAK/DDR1/NTRK1/PDGFA/ERRFI1/ACE/FLT3/CAV1/MKNK2/MAPKAPK3/RAP2A/MUSK
BP	GO:0060675	ureteric bud morphogenesis	52	-0.614274	-1.3827	0.0807927	0.475164	0.437016	2575	tags=35%, list=20%, signal=28%	SIX1/SHH/NPNT/PBX1/NOG/FGF1/WNT2B/KIF26B/WT1/PKD2/TACSTD2/AGT/GATA3/FGF8/CITED1/HES1/SOX9/LHX1
BP	GO:0008542	visual learning	38	-0.639367	-1.38961	0.0811232	0.475476	0.437303	1485	tags=18%, list=12%, signal=16%	CDK5/PIAS1/RGS14/PPP1R1B/NDRG4/ATP1A2/RIC8A
BP	GO:0050982	detection of mechanical stimulus	38	-0.641406	-1.39404	0.0811232	0.475476	0.437303	1354	tags=29%, list=11%, signal=26%	ASIC2/PKD2/ADGRV1/TTN/CXCL12/CDH2/HPN/NTRK1/COL11A1/ITGA2/BACE1
BP	GO:2001269	positive regulation of cysteine-type endopeptidase activity involved in apoptotic signaling pathway	10	-0.795414	-1.38835	0.0812721	0.475476	0.437303	1460	tags=40%, list=11%, signal=35%	JAK2/BAX/SMAD3/GSN
BP	GO:0090313	regulation of protein targeting to membrane	27	-0.676414	-1.38915	0.0813008	0.475476	0.437303	1486	tags=22%, list=12%, signal=20%	PDZK1/CDK5/ITGAM/CHP1/STOM/MTCL1
BP	GO:0090162	establishment of epithelial cell polarity	26	-0.685139	-1.40169	0.0814332	0.475476	0.437303	2542	tags=38%, list=20%, signal=31%	PARD3/OPHN1/ARF6/FRMD4B/TCF15/SLC9A3R1/CYTH1/HES1/FOXF1/WNT5A
MF	GO:0015296	anion:cation symporter activity	19	-0.72747	-1.40981	0.0815308	0.475476	0.437303	4	tags=11%, list=0%, signal=11%	SLC18A2/SLC13A4
BP	GO:0071624	positive regulation of granulocyte chemotaxis	19	-0.727999	-1.41084	0.0815308	0.475476	0.437303	201	tags=37%, list=2%, signal=36%	DAPK2/MOSPD2/RAC2/C5AR1/TIRAP/S100A14/LBP
BP	GO:0030317	flagellated sperm motility	54	-0.613579	-1.38051	0.0815385	0.475476	0.437303	1006	tags=15%, list=8%, signal=14%	IQCG/APOB/ENKUR/PLA2G3/SORD/TTLL9/DDX4/CCR6
BP	GO:0045778	positive regulation of ossification	42	-0.626807	-1.38188	0.0815385	0.475476	0.437303	2104	tags=31%, list=17%, signal=26%	ATRAID/BMP7/GPM6B/SOX11/SMAD3/WNT10B/SLC8A1/ADGRV1/PTN/BMPR1B/TMEM119/LTF/WNT5A
BP	GO:0097722	sperm motility	54	-0.613579	-1.38051	0.0815385	0.475476	0.437303	1006	tags=15%, list=8%, signal=14%	IQCG/APOB/ENKUR/PLA2G3/SORD/TTLL9/DDX4/CCR6
MF	GO:1990841	promoter-specific chromatin binding	48	0.534202	1.34396	0.0816327	0.475476	0.437303	2132	tags=31%, list=17%, signal=26%	PDX1/RBL2/MED1/DHX9/NUP98/ISL1/PCGF1/HDAC4/SOX10/HNRNPU/HSF1/KLF4/FOXO4/CHD7/ERCC4
MF	GO:0004812	aminoacyl-tRNA ligase activity	20	0.665994	1.41698	0.0816832	0.475476	0.437303	3552	tags=60%, list=28%, signal=43%	LRRC47/LARS2/FARSA/IARS2/WARS2/CARS2/FARSB/YARS2/DALRD3/EARS2/AARSD1/NARS2
MF	GO:0016875	ligase activity, forming carbon-oxygen bonds	20	0.665994	1.41698	0.0816832	0.475476	0.437303	3552	tags=60%, list=28%, signal=43%	LRRC47/LARS2/FARSA/IARS2/WARS2/CARS2/FARSB/YARS2/DALRD3/EARS2/AARSD1/NARS2
BP	GO:0032048	cardiolipin metabolic process	14	0.726053	1.41125	0.0819672	0.476753	0.438478	1240	tags=29%, list=10%, signal=26%	HADHA/TAMM41/HADHB/PHB2
BP	GO:0090277	positive regulation of peptide hormone secretion	74	0.472478	1.28288	0.0820669	0.476841	0.438558	247	tags=8%, list=2%, signal=8%	RFX6/INS/GCG/CFTR/GJA1/PDX1
MF	GO:0004252	serine-type endopeptidase activity	86	-0.568984	-1.36441	0.0821114	0.476841	0.438558	1373	tags=30%, list=11%, signal=27%	FAP/TMPRSS13/F2/PROZ/PIK3IP1/CTSH/CTSC/CFB/PROC/F9/PLAU/CFI/HPN/LTF/HABP2/MST1/KLK15/PRSS27/TMPRSS4/HGF/PLG/TMPRSS15/HTRA3/MMP2/HTRA1/F11
BP	GO:0051650	establishment of vesicle localization	186	0.394658	1.20308	0.0823019	0.477087	0.438784	2006	tags=25%, list=16%, signal=21%	SEC24D/FAM91A1/DYNC1H1/AP3B2/SEC16A/PREB/PDCD6/TMED10/SEC16B/TRIP11/TRAK2/BBS2/SEC13/SYT11/LRRK2/RAB27B/KIF3A/SCFD1/LMAN1/SEC22B/SEC31A/TMED2/GPR143/NSF/KIF5A/GOLGA2/TMED9/RAB1B/USO1/ARFGAP2/AP1AR/GBF1/PEF1/BBS5/RAB1A/SYNJ1/SEC24A/BET1/WDR11/GOSR1/GOSR2/DCTN2/TFG/ACTN4/RAB11A/MYO5C
BP	GO:0007605	sensory perception of sound	114	-0.53491	-1.31574	0.0823864	0.477087	0.438784	1904	tags=25%, list=15%, signal=21%	TBX1/TMTC4/GABRA5/COL2A1/USH1C/CRYM/SOBP/CDC14A/SLC52A3/HEXB/OTOA/SOD1/ASIC2/CACNA1D/SLC9A3R1/USH2A/ADGRV1/ATP8B1/TRIOBP/FZD4/HPN/GRAP/MYO7A/COL1A1/COL11A1/LRTOMT/COCH/OTOR
BP	GO:1902743	regulation of lamellipodium organization	46	-0.621474	-1.37867	0.0825688	0.477087	0.438784	856	tags=22%, list=7%, signal=20%	CORO1C/RAC2/SRC/AKIRIN1/PIK3R1/FSCN1/WASF2/OCLN/AVIL/TWF2
BP	GO:0022600	digestive system process	67	-0.596529	-1.38417	0.0825826	0.477087	0.438784	1140	tags=24%, list=9%, signal=22%	MOGAT2/F11R/RBP4/HIP1R/APOA1/SLC2A2/EZR/NPR3/PBLD/FABP2/SOX9/MUC13/PTGER3/ABCG5/ABCG8/SNX10
BP	GO:0006361	transcription initiation from RNA polymerase I promoter	30	0.6176	1.42447	0.0826667	0.477087	0.438784	2576	tags=40%, list=20%, signal=32%	TAF1C/CCNH/RRN3/MNAT1/SMARCA4/GTF2H3/POLR1C/POLR1A/GTF2H5/ERCC2/SMARCB1/POLR1B
MF	GO:0008235	metalloexopeptidase activity	47	-0.619277	-1.37875	0.0828221	0.477087	0.438784	1080	tags=21%, list=8%, signal=20%	ANPEP/DPEP1/CPA2/MMP14/METAP2/CPN1/CPXM1/ACE/CPZ/CPA6
BP	GO:0014706	striated muscle tissue development	289	-0.453973	-1.23886	0.0828258	0.477087	0.438784	1990	tags=27%, list=16%, signal=24%	SHH/BCL9/EFNB2/PRKAA1/NRAP/DDX17/RARB/HIVEP3/MYH11/LRRC10/MEF2D/YAP1/SMAD7/NOG/TBX5/DSG2/TNNC1/BMP7/TBX1/NPHS1/CBY1/MYH7/MYH6/MEGF10/GATA4/KDM6B/MYL2/ASB2/SOX11/YY1/SMAD1/HLX/CDK5/WT1/GLI1/TBX20/SMAD3/DSP/BMP5/CFLAR/FRS2/CXADR/TNNT2/CCNB1/DLL1/VGLL4/WNT10B/SLC8A1/LOX/HMG20B/RBP4/CASQ1/MYOM2/TTN/FZD7/TGFBR2/IGF2/POPDC3/ELN/AKIRIN1/EEF2/MAPK14/DLL4/FGF8/KCNAB1/ACTN2/SEMA3C/SGCB/NDRG4/ALPK2/PAX5/COL…
BP	GO:0033143	regulation of intracellular steroid hormone receptor signaling pathway	61	0.502505	1.32731	0.0828402	0.477087	0.438784	1931	tags=30%, list=15%, signal=25%	UFL1/CALR/MED1/UFSP2/ZNF366/UFM1/ESR1/UBA5/ISL1/SMARCA4/PHB2/PPP5C/CLOCK/CARM1/PRMT2/PER1/CNOT1/DDRGK1
BP	GO:0033674	positive regulation of kinase activity	490	-0.426575	-1.2016	0.0828604	0.477087	0.438784	2025	tags=22%, list=16%, signal=19%	F2R/EPHA3/KRAS/TLR9/FGF1/PDE6H/ABL1/MAP4K2/GRM1/AJUBA/ANGPT4/TYRO3/SYAP1/EPHA6/KIF14/MAP2K7/ADCYAP1/CD40/C5AR1/SRC/EPHB3/PAK4/CXCR4/ADORA1/SIRT1/MERTK/PRKAR2B/CARD10/PTK2B/GHR/PPP1R9A/CDK5/PKN1/DAB2IP/SOD1/CSK/HBEGF/CAMK1/UNC119/PFKFB2/FZD10/PARK7/LPAR3/CSF1R/TIRAP/AGAP2/PKD2/MLKL/FRS2/VLDLR/ALK/ECT2/F2/CCNB1/IGF1R/AGT/MALT1/ADCY1/ADCY8/P2RY12/NEK10/FCGR1A/ARHGEF5/EMP2/TGFBR2/IGF2/VEGFC/NOX4/GPRC…
BP	GO:1901861	regulation of muscle tissue development	32	-0.661939	-1.38645	0.0829346	0.477087	0.438784	3224	tags=53%, list=25%, signal=40%	LMOD3/WNT3A/MTPN/FLOT1/MYOD1/TGFB1/SHH/PRKAA1/IGFBP5/PPARGC1A/MEGF10/SMAD3/DLL1/WNT10B/LOX/IGF2/FGF8
BP	GO:0007265	Ras protein signal transduction	287	-0.448223	-1.22353	0.0830281	0.477087	0.438784	2412	tags=23%, list=19%, signal=19%	OPHN1/RHOG/RASIP1/ARHGEF12/RHOB/LIMK1/CCNA2/SYNPO2L/ARF6/PIK3CG/TAX1BP3/RAC2/F2R/PLD1/KRAS/RAB12/ABL1/GNA13/CDC42EP1/LPAR4/KIF14/NET1/RTN4R/RGL2/RALA/DAB2IP/PARK7/JUN/RAB33B/AIF1/ITPKB/FLCN/RAB39B/CDK2/EPOR/F11R/RASA3/GRAP2/CADM4/CELSR1/APOA1/SHTN1/ARRB1/MAPK14/PLK2/WASF2/LYN/BCL6/MRAS/GPR18/GPR4/GRAP/EPS8/RRAS2/CYTH1/APOE/NTRK1/KITLG/COL1A2/NRP1/RAB30/EPO/EPS8L3/RAP2A/CDC42EP3/CSF1
BP	GO:0034370	triglyceride-rich lipoprotein particle remodeling	10	-0.793516	-1.38504	0.0830389	0.477087	0.438784	1594	tags=90%, list=13%, signal=79%	NR1H4/LPL/LIPC/APOA4/APOA1/APOB/APOE/APOC2/LCAT
BP	GO:2001053	regulation of mesenchymal cell apoptotic process	10	-0.794308	-1.38642	0.0830389	0.477087	0.438784	430	tags=50%, list=3%, signal=48%	BMP7/TBX1/HOXA13/SOX9/MSX1
CC	GO:0016459	myosin complex	42	-0.625582	-1.37918	0.0830769	0.477087	0.438784	3028	tags=48%, list=24%, signal=36%	CGNL1/MYO5A/MYO1F/MYO18B/MYL9/MYH11/MYO6/MYO1E/MYO1H/MYO10/MYH7/MYH6/MYL2/MYL1/MYL4/MYH1/MYO7A/MYH3/MYLPF/MYH2
BP	GO:1902175	regulation of oxidative stress-induced intrinsic apoptotic signaling pathway	22	0.647054	1.40078	0.0831234	0.477087	0.438784	965	tags=18%, list=8%, signal=17%	INS/FBXW7/TRAP1/BAG5
BP	GO:0046545	development of primary female sexual characteristics	82	-0.567646	-1.35854	0.0832117	0.477179	0.438869	1863	tags=26%, list=15%, signal=22%	COL9A3/ADCYAP1/SRC/SIRT1/WT1/SOD1/BAX/BRCA2/CYP19A1/GNRH1/ARRB1/BMPR1B/INHBB/FZD4/GAS2/MMP14/KITLG/PGR/DMC1/LHFPL2/AMH
MF	GO:0005112	Notch binding	18	-0.72884	-1.40159	0.0833333	0.477179	0.438869	1735	tags=28%, list=14%, signal=24%	SNED1/MEGF10/DLL1/DLL4/DLK2
BP	GO:1903706	regulation of hemopoiesis	277	-0.452088	-1.2316	0.0833333	0.477179	0.438869	1855	tags=23%, list=15%, signal=20%	MAFB/ANXA1/HOXA9/GNAS/PCK1/MOV10/GFI1B/THPO/PTK2B/CDK6/CSF3R/HLX/SOD1/JUN/ZFP36L2/ITPKB/BTK/CNOT4/DLL1/RUNX3/C1QC/MALT1/GPR68/GPR137B/CRTAM/LOX/PTN/GATA2/ATP11C/GP1BA/OCSTAMP/ZC3H12A/TGFBR2/PIK3R1/GATA3/MAPK14/TMEM176B/NRARP/ETS1/PIK3R6/SPI1/LRRC17/KAT2B/LYN/BCL6/CA2/DUSP10/SLC46A2/LTF/TESPA1/PLA2G3/RASSF2/NDFIP1/TLR3/MMP14/KITLG/KLF13/MPL/BGLAP/LOXL3/KAT7/SOX4/RC3H2/CSF1/PRKCZ
MF	GO:0016835	carbon-oxygen lyase activity	64	-0.594729	-1.3644	0.0834598	0.477487	0.439153	1459	tags=28%, list=11%, signal=25%	TPI1/PARK7/PCBD1/HACD2/ENO4/FASN/POLQ/HSD17B4/CA2/EHHADH/CA6/UROC1/CA8/TBXAS1/ETNPPL/FAHD2A/ENO3/CYP1A1
BP	GO:0046939	nucleotide phosphorylation	112	0.441695	1.26823	0.0836927	0.477487	0.439153	911	tags=16%, list=7%, signal=15%	INS/JMJD8/NUP205/CMPK1/NUP35/EIF6/AK9/ARNT/PRKAG2/SEC13/OGDH/NUP210/NUP188/NUP107/TPR/ALDOC/GALK1/NUP98
BP	GO:0032488	Cdc42 protein signal transduction	11	-0.788784	-1.38937	0.083779	0.477487	0.439153	962	tags=55%, list=8%, signal=50%	WAS/ABL1/APOA1/SHTN1/APOE/NRP1
BP	GO:0048754	branching morphogenesis of an epithelial tube	121	-0.525843	-1.31145	0.0837989	0.477487	0.439153	2230	tags=29%, list=18%, signal=24%	DAG1/YAP1/PBX1/NOG/KRAS/FGF1/WNT2B/ABL1/BMP7/SRC/WT1/TBX20/PKD2/TACSTD2/CTSH/NFATC4/AGT/CELSR1/EDNRA/TGFBR2/DLL4/FGF8/NRARP/PPP1CA/SFRP2/DDR1/MMP14/CITED1/PGR/FOXF1/NRP1/SOX9/WNT5A/LHX1/CSF1
CC	GO:0030173	integral component of Golgi membrane	52	0.520052	1.33205	0.083815	0.477487	0.439153	1217	tags=23%, list=10%, signal=21%	QSOX2/YIF1A/SLC35B1/SLC35B4/ENTPD4/SLC35A2/ERGIC1/UNC50/FURIN/ERGIC3/PCSK5/YIF1B
CC	GO:0089717	spanning component of membrane	17	-0.742222	-1.4095	0.0838926	0.477487	0.439153	1123	tags=24%, list=9%, signal=21%	NLGN2/CDHR2/SLC15A2/SLC15A1
CC	GO:0001725	stress fiber	49	-0.612691	-1.3725	0.0839695	0.477487	0.439153	2661	tags=41%, list=21%, signal=32%	LIMA1/FHL3/MYL9/MYLK/DCTN4/XIRP2/PXN/TPM4/LCP1/BAG3/LDB3/MYH7/MYH6/FAM107A/MICALL2/TPM3/NOX4/FSCN1/PGM5/PRKCZ
BP	GO:0032835	glomerulus development	49	-0.613466	-1.37423	0.0839695	0.477487	0.439153	2147	tags=35%, list=17%, signal=29%	IQGAP1/MAGI2/NOG/MYO1E/BMP7/NPHS1/KIRREL3/ENPEP/WT1/CFLAR/NID1/ANGPT1/GPR4/ANGPT2/KLF15/HES1/LHX1
CC	GO:0097517	contractile actin filament bundle	49	-0.612691	-1.3725	0.0839695	0.477487	0.439153	2661	tags=41%, list=21%, signal=32%	LIMA1/FHL3/MYL9/MYLK/DCTN4/XIRP2/PXN/TPM4/LCP1/BAG3/LDB3/MYH7/MYH6/FAM107A/MICALL2/TPM3/NOX4/FSCN1/PGM5/PRKCZ
BP	GO:2001238	positive regulation of extrinsic apoptotic signaling pathway	38	-0.635701	-1.38164	0.0842434	0.478676	0.440246	1669	tags=26%, list=13%, signal=23%	DEDD2/RBCK1/AGT/TNFSF10/PPP1CA/BMPR1B/TRAF2/BCL10/CAV1/TNFSF12
BP	GO:0003007	heart morphogenesis	198	-0.481588	-1.27159	0.0844156	0.479286	0.440807	2616	tags=34%, list=21%, signal=27%	TGFB1/FLRT2/SIX1/CRKL/SHH/SPRY1/CLDN5/RARB/CCDC39/SUFU/SYNPO2L/SLIT3/SNAI2/YAP1/SMAD7/NOG/TBX5/PDCD4/IFT172/TNNC1/BMP7/EOMES/TBX1/COL2A1/MYH7/MYH6/AHI1/GATA4/MYL2/SOX11/TBX20/GAA/SMAD3/NODAL/DSP/HAND2/BMP5/ADGRG6/PKD2/TMEM100/SMAD6/TNNT2/DLL1/RBP4/SMARCD3/TTN/TGFBR2/GJA5/ELN/GATA3/DLL4/FGF8/FZD2/SEMA3C/SFRP2/EFNA1/NDRG4/ALPK2/HES1/COL11A1/FOXF1/NRP1/SOX9/DHRS3/SOX4/WNT5A/MSX1
BP	GO:0043068	positive regulation of programmed cell death	430	-0.438075	-1.2225	0.0845886	0.479899	0.441371	2364	tags=24%, list=19%, signal=21%	MELK/ARHGEF12/DAPK2/PPARGC1A/PREX1/TGM2/RHOB/GRN/TRIM39/PLA2G1B/KNG1/ATG7/STK17A/HMOX1/PRKCD/PPARG/PDCD4/ITGB1/ABL1/NACC2/GNA13/BMP7/ANXA1/TNFRSF1B/NET1/CD40/ITGA6/TNFRSF10C/SRC/B4GALT1/ADAM10/DEDD2/SIRT1/TOP2A/RBCK1/GRIK5/GRIK2/IGFBP3/CDK5/RAPSN/DAB2IP/SOD1/BAX/TFPT/TRIM35/PARK7/JUN/E2F3/FAP/C3orf38/KALRN/SYCE3/SPDEF/ECT2/CDC34/FLCN/CTSD/NFATC4/AGT/E2F1/SLC9A3R1/WNT10B/CTSC/BIN1/PTN/ARHGEF5/HIP1…
BP	GO:0010232	vascular transport	73	-0.582765	-1.36772	0.0846954	0.479955	0.441422	1482	tags=19%, list=12%, signal=17%	SLC2A1/SLC16A7/SLC1A5/ABCG2/SLC29A1/SLC1A4/SLC9A3R1/APOE/ABCB1/SLC7A2/ATP1A2/SLC6A6/SLC15A2/SLC16A12
CC	GO:0005859	muscle myosin complex	10	-0.79225	-1.38283	0.0848057	0.479955	0.441422	1803	tags=90%, list=14%, signal=77%	MYL9/MYH11/MYH7/MYH6/MYL1/MYH1/MYH3/MYLPF/MYH2
BP	GO:0071333	cellular response to glucose stimulus	101	0.45251	1.28681	0.0848237	0.479955	0.441422	1228	tags=14%, list=10%, signal=13%	RFX6/SLC39A14/GCG/CFTR/PDX1/SRF/ADCY5/OPA1/PTPRN2/RAB11FIP2/PPP3CA/SMARCA4/LRP5/ERN1
MF	GO:0004622	lysophospholipase activity	19	-0.725296	-1.4056	0.0848586	0.479955	0.441422	144	tags=16%, list=1%, signal=16%	PLA2G4A/PLA2G15/GDPD3
BP	GO:0072078	nephron tubule morphogenesis	60	-0.599553	-1.36847	0.0851064	0.480631	0.442044	2575	tags=35%, list=20%, signal=28%	SIX1/SHH/NPNT/WNK4/PBX1/NOG/FGF1/WNT2B/IRX2/AHI1/KIF26B/WT1/PKD2/TACSTD2/AGT/GATA3/FGF8/CITED1/HES1/SOX9/LHX1
MF	GO:0005044	scavenger receptor activity	34	-0.652723	-1.38203	0.0851735	0.480631	0.442044	2341	tags=47%, list=18%, signal=38%	ENPP1/MARCO/DMBT1/LOXL4/ACKR4/ACKR3/MEGF10/TMPRSS5/TMPRSS13/SCARA3/CFI/TMPRSS4/ENDOU/SCARA5/TMPRSS15/LOXL3
BP	GO:1904645	response to amyloid-beta	34	-0.651408	-1.37924	0.0851735	0.480631	0.442044	1485	tags=21%, list=12%, signal=18%	CDK5/IGF1R/FPR2/EPHA4/LGMN/BACE1/MMP2
CC	GO:0072562	blood microparticle	65	-0.593924	-1.36839	0.0854573	0.481693	0.443021	2091	tags=48%, list=16%, signal=40%	HBG2/CFH/ORM1/HSPA8/HPX/ACTB/APOA4/SLC2A1/C4B/TMPRSS13/F2/C8G/FN1/AGT/C1QC/C8A/SLC4A1/CFB/APOA1/ITIH2/ZBTB38/GSN/A2M/APOE/STOM/SERPING1/PLG/PZP/AMBP/AHSG/BCHE
CC	GO:0045178	basal part of cell	206	-0.476841	-1.267	0.0854922	0.481693	0.443021	1995	tags=27%, list=16%, signal=23%	TLR9/PLPP3/MAP4K2/EPS15/ST14/ANXA1/ABCC5/CLDN7/SLC22A7/C5AR1/B4GALT1/ADORA1/AQP9/SLC40A1/SLC2A1/DSP/FAP/PKD2/PTH1R/SLC1A5/CXADR/PALM/PDZD11/TACSTD2/SLC29A1/SLC3A2/EPPK1/ADCY8/P2RY12/PRCP/SLC4A1/RAB17/ARRB1/S100G/CDH2/WASF2/CEACAM5/GM2A/FRMPD2/MAP7/CA2/LIN7A/EZR/CLDN11/NDRG4/ALPK2/RHCG/RHBG/SLC6A6/ITGA2/STX2/SLC10A1/P2RY4/SLC16A10/SLC22A6/SLC16A12
CC	GO:0031228	intrinsic component of Golgi membrane	55	0.513617	1.3402	0.0857143	0.48187	0.443183	1217	tags=22%, list=10%, signal=20%	QSOX2/YIF1A/SLC35B1/SLC35B4/ENTPD4/SLC35A2/ERGIC1/UNC50/FURIN/ERGIC3/PCSK5/YIF1B
BP	GO:0051249	regulation of lymphocyte activation	285	-0.448016	-1.22125	0.0857843	0.48187	0.443183	1995	tags=24%, list=16%, signal=20%	TLR9/GPAM/TNFRSF14/ABL1/TYRO3/ANXA1/TNFRSF1B/CD40/PCK1/SRC/MERTK/TNFRSF13B/SOX11/HLX/SH3KBP1/PKN1/SOD1/CSK/ZFP36L2/PARP3/AIF1/TIRAP/ITPKB/BTK/RUNX3/MALT1/CD22/GRAP2/CRTAM/GNRH1/BLOC1S3/ATP11C/ZC3H12A/HLA-DPB1/TGFBR2/IGF2/PIK3R1/GATA3/NRARP/PIK3R6/BCL10/TNFSF13B/LYN/SIRPA/BCL6/TMIGD2/DUSP10/SLC46A2/PDPK1/TESPA1/BLK/NDFIP1/MMP14/IGLL1/CD209/HLA-DPA1/HES1/CD276/MPL/CAV1/LOXL3/SOX4/SFTPD/EPO/RC3H2/FG…
BP	GO:0034728	nucleosome organization	82	0.473417	1.30836	0.0858442	0.48187	0.443183	1504	tags=20%, list=12%, signal=17%	CENPO/CHD5/SET/ZNHIT1/GRWD1/ANP32E/CENPP/IPO4/LIN54/RSF1/SMARCA4/INO80/DAXX/RBBP4/BPTF/PSME4
CC	GO:1904115	axon cytoplasm	54	0.534203	1.3879	0.0858509	0.48187	0.443183	664	tags=13%, list=5%, signal=12%	DYNC1H1/AP3B2/TRAK2/OPA1/RAB27B/KIF3A/DST
BP	GO:0016049	cell growth	376	-0.437933	-1.21739	0.0860465	0.48187	0.443183	1720	tags=17%, list=14%, signal=15%	PAK4/CDA/CXCR4/RTN4R/GATA4/CDH4/ADAM10/SIRT1/MYL2/PTPRS/PTK2B/YY1/IGFBP3/CDK5/WT1/HBEGF/SMAD3/IGFBP4/LPAR3/FAM107A/DCBLD2/F2/FLCN/LAMTOR1/FN1/SEMA7A/AGT/VGLL4/CYP27B1/SEMA3A/SMARCA2/PLXNA4/TGFBR2/SHTN1/SEMA3D/NPR1/MAP2/CDKL5/CXCL12/FGF13/DSCAM/SEMA3C/SFRP2/ALCAM/BCL6/HPN/NEDD4L/SLC25A33/DDR1/MMP14/PPT1/APOE/IP6K2/CDHR2/WFDC1/TWF2/NRP1/SOX9/SYT4/WNT5A/SGK2/MSX1/CDKN2C/PRKCZ/POSTN
MF	GO:0016408	C-acyltransferase activity	12	0.748366	1.39595	0.0860465	0.48187	0.443183	1977	tags=42%, list=16%, signal=35%	HADHA/ACAA2/HADHB/ACAA1/GCAT
MF	GO:0005496	steroid binding	77	-0.576173	-1.36298	0.0860534	0.48187	0.443183	1182	tags=16%, list=9%, signal=14%	PAQR5/PGRMC1/APOA1/RORA/S100G/PGR/ATP1A2/OSBP2/CYP2R1/CAV1/CYP3A4/HSD11B2
BP	GO:0043113	receptor clustering	48	-0.610899	-1.37055	0.0864947	0.48187	0.443183	1535	tags=19%, list=12%, signal=17%	GRIK5/GRIK2/CDK5/ZDHHC2/PTN/GSN/CDH2/APOE/MUSK
BP	GO:0006929	substrate-dependent cell migration	23	-0.695919	-1.38671	0.0865225	0.48187	0.443183	1202	tags=52%, list=9%, signal=47%	ROBO1/ANKS1A/CTTN/OPHN1/EPB41L5/FN1/ITGA11/P2RY12/SHTN1/VEGFC/NRP1/ITGA2
BP	GO:0033028	myeloid cell apoptotic process	23	-0.697721	-1.3903	0.0865225	0.48187	0.443183	2219	tags=39%, list=17%, signal=32%	ARF6/APOH/ANXA1/GHSR/SIRT1/MAEA/ITPKB/KITLG/EPO
BP	GO:0007549	dosage compensation	14	0.715186	1.39012	0.0866511	0.48187	0.443183	2829	tags=50%, list=22%, signal=39%	YTHDC1/RBM15/UPF1/HNRNPU/CDYL/SMCHD1/PRDM14
BP	GO:0009048	dosage compensation by inactivation of X chromosome	14	0.715186	1.39012	0.0866511	0.48187	0.443183	2829	tags=50%, list=22%, signal=39%	YTHDC1/RBM15/UPF1/HNRNPU/CDYL/SMCHD1/PRDM14
BP	GO:0003215	cardiac right ventricle morphogenesis	18	-0.726608	-1.3973	0.0866667	0.48187	0.443183	1687	tags=39%, list=13%, signal=34%	GATA4/TBX20/HAND2/SMARCD3/GATA3/SEMA3C/SOX4
CC	GO:0032993	protein-DNA complex	93	0.447001	1.27033	0.0866873	0.48187	0.443183	1764	tags=13%, list=14%, signal=11%	NFYB/MED1/ORC3/TEN1/ESR1/KCNIP3/BRF1/NFYA/PRPF19/PRKDC/TERF2IP/GTF2H3
MF	GO:0019843	rRNA binding	53	0.511051	1.32008	0.0867052	0.48187	0.443183	2795	tags=34%, list=22%, signal=27%	RPL5/MRPS18C/TACO1/RPF2/MRPS27/RPS5/RPS9/MDM2/RPS13/RRS1/PPAN/EMG1/GTF3A/MRPS7/MRPS6/IMP3/RPS3/RPL11
BP	GO:1904356	regulation of telomere maintenance via telomere lengthening	53	0.512796	1.32459	0.0867052	0.48187	0.443183	2613	tags=38%, list=21%, signal=30%	XRN1/CCT3/CCT6A/CCT4/PRKCQ/TEN1/CCT8/ATR/HNRNPU/CCT7/CCT5/HNRNPA1/PNKP/ERCC4/TNKS/NAT10/NEK7/PINX1/TCP1/DHX36
CC	GO:0016323	basolateral plasma membrane	170	-0.489655	-1.28231	0.086728	0.48187	0.443183	1995	tags=28%, list=16%, signal=24%	TLR9/PLPP3/MAP4K2/ST14/ANXA1/ABCC5/CLDN7/SLC22A7/C5AR1/B4GALT1/ADORA1/AQP9/SLC40A1/SLC2A1/DSP/PTH1R/CXADR/PALM/PDZD11/SLC29A1/SLC3A2/EPPK1/ADCY8/SLC4A1/RAB17/ARRB1/S100G/CDH2/WASF2/CEACAM5/GM2A/FRMPD2/MAP7/CA2/LIN7A/EZR/NDRG4/ALPK2/RHCG/RHBG/SLC6A6/STX2/SLC10A1/P2RY4/SLC16A10/SLC22A6/SLC16A12
BP	GO:0009165	nucleotide biosynthetic process	195	-0.483615	-1.27606	0.0867876	0.48187	0.443183	1139	tags=19%, list=9%, signal=18%	AK4/AK7/PANK1/NMRK2/PPCS/NMNAT3/NPR2/AK3/IDO2/NAMPT/AMPD3/GUK1/UCKL1/PDK1/FLCN/ADCY1/ADCY8/HACD2/ALDOA/CBR4/NPR1/FASN/NADK/AK1/HAAO/APRT/AMPD1/GSTZ1/PPT1/ACMSD/ACLY/PID1/AK8/NME4/ACSL5/ACSS2/SCD5
MF	GO:0004197	cysteine-type endopeptidase activity	72	-0.58334	-1.36578	0.0868263	0.48187	0.443183	1740	tags=25%, list=14%, signal=22%	CTSB/USP11/CASP6/USP48/CFLAR/CTSS/CTSH/CAPN15/MALT1/CTSC/CASP9/USP24/USP30/ATG4C/LGMN/UCHL1/CTSV/ESPL1
BP	GO:0042445	hormone metabolic process	155	-0.498963	-1.29151	0.0868385	0.48187	0.443183	1163	tags=18%, list=9%, signal=17%	CRABP1/CYP27B1/SCPEP1/CYP19A1/RBP4/REN/HSD17B4/GATA3/LRAT/IYD/RDH16/CYP46A1/HPN/RDH11/BACE2/CLCN2/ALDH8A1/ACE/HSD17B7/DHCR7/DGAT2/DHRS3/HSD3B1/RDH8/CYP1A1/CYP3A4/SLC16A10/DIO1
BP	GO:0034341	response to interferon-gamma	112	-0.529297	-1.29886	0.0868946	0.48187	0.443183	2161	tags=23%, list=17%, signal=19%	MEFV/CCL20/PRKCD/PPARG/HPX/SUMO1/CD40/TRIM8/AIF1/PIAS1/CYP27B1/HCK/FCGR1A/HLA-DPB1/GAPDH/GSN/VAMP3/SIRPA/TLR3/CITED1/GCH1/IFITM3/CD58/HLA-DPA1/WNT5A/CCL25
BP	GO:1903426	regulation of reactive oxygen species biosynthetic process	69	0.478878	1.29088	0.0870871	0.482567	0.443825	1236	tags=20%, list=10%, signal=18%	INS/IL10/IL1B/ARG2/ADGRB1/HSP90AA1/ATP2B4/PTGIS/ABCD1/NOS1AP/TSPO/TRAP1/KHSRP/HDAC4
BP	GO:0043410	positive regulation of MAPK cascade	396	-0.436227	-1.2152	0.0872093	0.482567	0.443825	2123	tags=24%, list=17%, signal=21%	PIK3CG/CCL20/MAP2K5/ACKR3/F2R/KRAS/TLR9/FGF1/PDE6H/ABL1/MAP4K2/GRM1/AJUBA/TBX1/MAP2K7/ADCYAP1/CD40/C5AR1/SRC/THPO/CXCR4/WWC1/GATA4/GNAI2/PTK2B/GHR/IGFBP3/PKN1/DAB2IP/SOD1/CSK/CARD9/NODAL/FZD10/HAND2/IGFBP4/LPAR3/CFLAR/CSF1R/TIRAP/MLKL/FRS2/ALK/TMEM106A/LAMTOR1/TNFRSF19/SEMA7A/IGF1R/AGT/PLCB1/NEK10/SEMA3A/ARHGEF5/FZD7/ZC3H12A/IGF2/ARRB1/FPR2/MAPK14/FGF8/NENF/SH3RF3/XDH/PIK3R6/TRAF2/DUSP5/FZD4/CDH2…
BP	GO:0071474	cellular hyperosmotic response	11	-0.784159	-1.38122	0.087344	0.482567	0.443825	361	tags=27%, list=3%, signal=27%	SLC2A1/ERRFI1/EPO
BP	GO:0045198	establishment of epithelial cell apical/basal polarity	12	-0.779379	-1.39446	0.0874126	0.482567	0.443825	1386	tags=33%, list=11%, signal=30%	TCF15/SLC9A3R1/FOXF1/WNT5A
MF	GO:0004896	cytokine receptor activity	63	-0.590407	-1.3569	0.0874811	0.482567	0.443825	2274	tags=35%, list=18%, signal=29%	IL1R1/GFRA2/ACKR4/IL17RC/IL5RA/IL1R2/ACKR3/IL17RB/CXCR4/GHR/CSF3R/EPOR/IL17RA/IL9R/IFNAR1/CCR9/PRLR/FZD4/CMKLR1/FLT3/MPL/CCR6
BP	GO:2000243	positive regulation of reproductive process	54	-0.607017	-1.36575	0.0876923	0.482567	0.443825	1144	tags=19%, list=9%, signal=17%	PLCB1/SEMA3A/TOPAZ1/INHBB/MEIOC/SOX9/LHFPL2/WNT5A/MSX1/CCR6
CC	GO:0005798	Golgi-associated vesicle	78	0.465336	1.28079	0.0878788	0.482567	0.443825	1662	tags=41%, list=13%, signal=36%	CFTR/CLTB/GJA1/TMED10/COPZ2/COPG2/PI4KA/MAP6/LRRK2/AP1G2/RAB27B/SCFD1/SEC22B/CNGB1/TMED7/FURIN/COPA/TMED2/COPE/KDELR2/COPZ1/CLTC/SYNRG/ARCN1/SCYL1/TMED9/RAB14/CHIC2/COPB1/COPB2/AP2A1/AP1G1
BP	GO:0022406	membrane docking	167	0.401031	1.21615	0.0879042	0.482567	0.443825	1400	tags=19%, list=11%, signal=17%	MAPRE1/DYNC1H1/CFTR/HSP90AA1/STX12/TUBB4B/CEP192/SCFD2/TUBA1A/SCFD1/CEP164/CPLX2/AKAP9/TUBA4A/NPHP4/ESYT2/DCTN1/NPHP1/IQCB1/UNC13A/PLK4/CEP131/CEP250/ODF2/PPP2R1A/RABEPK/CEP152/CEP76/NSF/CDK5RAP2/USO1
MF	GO:0046943	carboxylic acid transmembrane transporter activity	117	-0.523994	-1.29759	0.0879433	0.482567	0.443825	395	tags=12%, list=3%, signal=12%	ABCB1/SLC7A2/SLC25A30/SLC6A6/SLC6A19/ABCB11/SLC13A5/SLC10A1/SLC6A7/SLC10A2/SLC16A10/SFXN5/SLC6A18/SLC16A12
BP	GO:0060294	cilium movement involved in cell motility	64	-0.592811	-1.36	0.0880121	0.482567	0.443825	1006	tags=14%, list=8%, signal=13%	IQCG/APOB/ENKUR/PLA2G3/CCSAP/SORD/TTLL9/DDX4/CCR6
BP	GO:0010656	negative regulation of muscle cell apoptotic process	29	-0.665107	-1.3707	0.0880914	0.482567	0.443825	2293	tags=48%, list=18%, signal=40%	PPP1R10/HMOX1/BAG3/APOH/BMP7/ADCYAP1/GATA4/RGL2/PTK2B/HAND2/CFLAR/ZC3H12A/SFRP2/PDPK1
BP	GO:0032757	positive regulation of interleukin-8 production	39	-0.633895	-1.38591	0.0880989	0.482567	0.443825	866	tags=36%, list=7%, signal=34%	PLA2G1B/SERPINE1/F2R/TLR9/TLR1/PARK7/TIRAP/MAVS/BCL10/TLR3/TLR5/CD58/WNT5A/LBP
BP	GO:0006109	regulation of carbohydrate metabolic process	169	0.412744	1.25312	0.0881129	0.482567	0.443825	1467	tags=18%, list=12%, signal=16%	INS/JMJD8/GCG/MIDN/NUP205/EGF/NUP35/EIF6/SLC35B4/NFKB1/ARNT/PRKAG2/SEC13/NUP210/NUP188/USP7/NUP107/TPR/ADIPOR1/NUP98/SOGA1/CLTC/PPP1R3A/GNB3/DGKQ/HDAC4/NUP155/NUP153/SIRT7/COX11
BP	GO:0016054	organic acid catabolic process	218	-0.472552	-1.25917	0.0881226	0.482567	0.443825	1806	tags=21%, list=14%, signal=18%	AGXT/GNPDA1/PCK1/CRYM/IDO2/LPIN1/ASPA/PAH/DDO/SLC27A2/RENBP/GPT/TAT/DDAH2/ALDH4A1/PCBD1/GAD1/ACOT8/BCKDK/CRABP1/GADL1/GOT2/GCSH/HSD17B4/HAL/ASRGL1/HAAO/AMDHD1/GSTZ1/ACMSD/EHHADH/NPL/SORD/PEX2/ALDH8A1/PRODH/UROC1/CDO1/PON3/IL4I1/ABCB11/PLA2G15/AMDHD2/QDPR/PECR/CSAD
BP	GO:0030318	melanocyte differentiation	22	0.641192	1.38809	0.0881612	0.482567	0.443825	3	tags=5%, list=0%, signal=5%	OCA2
BP	GO:0010288	response to lead ion	19	-0.724354	-1.40377	0.0881864	0.482567	0.443825	725	tags=21%, list=6%, signal=20%	PPP1CA/SPARC/QDPR/BACE1
BP	GO:0060571	morphogenesis of an epithelial fold	19	-0.724515	-1.40409	0.0881864	0.482567	0.443825	2147	tags=42%, list=17%, signal=35%	SHH/NOG/WNT2B/BMP7/NODAL/BMP5/WNT5A/SOSTDC1
BP	GO:0050863	regulation of T cell activation	205	-0.475204	-1.26113	0.0881971	0.482567	0.443825	1164	tags=18%, list=9%, signal=16%	RUNX3/MALT1/GRAP2/CRTAM/GNRH1/ZC3H12A/HLA-DPB1/TGFBR2/IGF2/PIK3R1/GATA3/NRARP/PIK3R6/BCL10/TNFSF13B/LYN/SIRPA/BCL6/TMIGD2/DUSP10/SLC46A2/PDPK1/TESPA1/NDFIP1/CD209/HLA-DPA1/HES1/CD276/CAV1/LOXL3/SOX4/SFTPD/EPO/RC3H2/FGL1/PRKCZ
MF	GO:0120015	sterol transfer activity	18	-0.726517	-1.39712	0.0883333	0.482954	0.444181	1846	tags=44%, list=15%, signal=38%	OSBPL2/NPC2/APOA4/APOA1/APOB/APOE/ABCG5/ABCG8
BP	GO:0032435	negative regulation of proteasomal ubiquitin-dependent protein catabolic process	31	0.604619	1.40441	0.0884719	0.482996	0.444219	1931	tags=29%, list=15%, signal=25%	SGTA/USP7/KLHL40/USP14/BAG5/N4BP1/UBXN1/CAMLG/DDRGK1
BP	GO:0044743	protein transmembrane import into intracellular organelle	31	0.604243	1.40354	0.0884719	0.482996	0.444219	884	tags=10%, list=7%, signal=9%	HSPD1/PEX10/TOMM20
BP	GO:0098930	axonal transport	55	0.510673	1.33252	0.0885714	0.483182	0.44439	664	tags=13%, list=5%, signal=12%	DYNC1H1/AP3B2/TRAK2/OPA1/RAB27B/KIF3A/DST
BP	GO:0018215	protein phosphopantetheinylation	252	0.369858	1.16797	0.0890114	0.483968	0.445113	1278	tags=16%, list=10%, signal=15%	F13A1/TTLL5/PSMD14/QSOX2/PDIA6/ERO1B/RABGGTA/PDIA4/UFL1/ERP44/GALNT9/PLOD3/DOHH/SAE1/QPCTL/EOGT/USP5/USP7/ASPH/PLOD1/TXNDC5/UBA5/USP14/PDIA5/CHM/B3GNT3/QPCT/UBE2M/TTLL11/MGAT4A/LOXL2/UFC1/TTLL10/USP15/UBA6/CRELD2/GALNT10/OTUD7B/GALNT5/USP4
BP	GO:1902745	positive regulation of lamellipodium organization	33	-0.647822	-1.36606	0.0890302	0.483968	0.445113	856	tags=30%, list=7%, signal=28%	CORO1C/RAC2/SRC/AKIRIN1/PIK3R1/FSCN1/WASF2/OCLN/AVIL/TWF2
BP	GO:0045580	regulation of T cell differentiation	94	-0.55037	-1.32907	0.0890511	0.483968	0.445113	1514	tags=20%, list=12%, signal=18%	HLX/SOD1/ITPKB/RUNX3/MALT1/CRTAM/ZC3H12A/TGFBR2/GATA3/NRARP/PIK3R6/BCL6/DUSP10/SLC46A2/TESPA1/LOXL3/SOX4/RC3H2/PRKCZ
BP	GO:0043162	ubiquitin-dependent protein catabolic process via the multivesicular body sorting pathway	21	0.649019	1.38352	0.0890585	0.483968	0.445113	1063	tags=19%, list=8%, signal=17%	PLAA/PTPN23/STAM/RNF126
BP	GO:0032392	DNA geometric change	98	0.43882	1.24861	0.0891089	0.483968	0.445113	2833	tags=30%, list=22%, signal=23%	CHD5/HELQ/RAD23B/DHX9/ASCC3/MNAT1/DQX1/SSBP1/ERCC6/INO80/RBX1/CHD4/RAD51/RUVBL2/RAD54L/GTF2H3/CHTF18/RFC3/CHD7/MCMDC2/GTF2H5/RECQL/RAD54B/CHD8/ERCC2/DHX36/UBA52/RFC2/DDB1
BP	GO:0034063	stress granule assembly	20	0.659228	1.40258	0.0891089	0.483968	0.445113	606	tags=20%, list=5%, signal=19%	DYNC1H1/OGFOD1/UBAP2L/DDX6
BP	GO:0070372	regulation of ERK1 and ERK2 cascade	206	-0.474759	-1.26147	0.0893782	0.484142	0.445273	1812	tags=22%, list=14%, signal=19%	MAP2K7/ADCYAP1/C5AR1/SRC/THPO/GATA4/GNAI2/PTK2B/FBLN1/DAB2IP/CSK/NODAL/HAND2/C3orf33/CFLAR/CSF1R/TIRAP/FRS2/FLCN/FN1/SEMA7A/SLC9A3R1/NEK10/RGS14/ARRB1/FPR2/FGF8/GAREM1/C1QL4/LYN/SIRPA/ANGPT1/DUSP10/EZR/APOE/NTRK1/P2RY6/DUSP26/PDGFA/NDRG4/ERRFI1/NRP1/EPO/CCL25/MAP2K1/PRKCZ
BP	GO:1901293	nucleoside phosphate biosynthetic process	197	-0.481166	-1.27016	0.0893782	0.484142	0.445273	1139	tags=19%, list=9%, signal=17%	AK4/AK7/PANK1/NMRK2/PPCS/NMNAT3/NPR2/AK3/IDO2/NAMPT/AMPD3/GUK1/UCKL1/PDK1/FLCN/ADCY1/ADCY8/HACD2/ALDOA/CBR4/NPR1/FASN/NADK/AK1/HAAO/APRT/AMPD1/GSTZ1/PPT1/ACMSD/ACLY/PID1/AK8/NME4/ACSL5/ACSS2/SCD5
BP	GO:2000047	regulation of cell-cell adhesion mediated by cadherin	16	-0.742427	-1.38324	0.0894737	0.484142	0.445273	560	tags=25%, list=4%, signal=24%	SERPINF2/RGCC/PLG/WNT5A
BP	GO:0050908	detection of light stimulus involved in visual perception	18	0.68786	1.40513	0.0895522	0.484142	0.445273	2962	tags=56%, list=23%, signal=43%	SEMA5B/CNGB1/GUCY2F/CEP250/CCDC66/RPE65/RGS9BP/CACNA2D4/GNAT2/GJA10
BP	GO:0050962	detection of light stimulus involved in sensory perception	18	0.68786	1.40513	0.0895522	0.484142	0.445273	2962	tags=56%, list=23%, signal=43%	SEMA5B/CNGB1/GUCY2F/CEP250/CCDC66/RPE65/RGS9BP/CACNA2D4/GNAT2/GJA10
CC	GO:0098799	outer mitochondrial membrane protein complex	18	0.69309	1.41581	0.0895522	0.484142	0.445273	3109	tags=56%, list=24%, signal=42%	HSPA9/DNAJC11/IMMT/TOMM20/SAMM50/TOMM7/TOMM22/MTX2/TOMM40/TOMM5
BP	GO:0097178	ruffle assembly	39	-0.632457	-1.38276	0.0896445	0.484142	0.445273	1357	tags=36%, list=11%, signal=32%	RHOG/CORO1C/EVL/ARF6/WDPCP/AIF1/AIF1L/TACSTD2/P2RY12/DEF8/EPS8/CAV1/EPS8L3/SNX10
BP	GO:0043627	response to estrogen	59	-0.597595	-1.36088	0.0896657	0.484142	0.445273	1396	tags=27%, list=11%, signal=24%	ARSB/SLC34A2/SMAD6/CYP27B1/APOA1/OCSTAMP/TGFBR2/ARID5A/GATA3/ARPC1B/CA2/MMP14/CITED1/CAV1/BGLAP/EPO
BP	GO:0003198	epithelial to mesenchymal transition involved in endocardial cushion formation	13	-0.774885	-1.40038	0.0899654	0.484827	0.445903	2226	tags=46%, list=18%, signal=38%	SNAI2/NOG/TMEM100/TGFBR2/FGF8/MSX1
BP	GO:0044794	positive regulation by host of viral process	13	-0.774098	-1.39896	0.0899654	0.484827	0.445903	1970	tags=38%, list=15%, signal=33%	HSPA8/CSF1R/APOE/STOM/CAV2
MF	GO:0005342	organic acid transmembrane transporter activity	118	-0.523964	-1.29967	0.0901408	0.484827	0.445903	395	tags=12%, list=3%, signal=12%	ABCB1/SLC7A2/SLC25A30/SLC6A6/SLC6A19/ABCB11/SLC13A5/SLC10A1/SLC6A7/SLC10A2/SLC16A10/SFXN5/SLC6A18/SLC16A12
BP	GO:2000027	regulation of animal organ morphogenesis	155	0.406506	1.22406	0.0902077	0.484827	0.445903	653	tags=16%, list=5%, signal=15%	PSMC4/PSMD14/PSMD2/PSMC3/PSMD6/PSMD1/PSMC5/PSMC2/PSMC1/PSMA3/PSMD7/PSMD13/PSMD8/PSMD4/PSMD3/VANGL1/PSMB5/PSMA5/PSMC6/PSMB4/PSMD12/PSMB2/PSMD11/PSMB1/PSMA2
BP	GO:0007588	excretion	46	-0.614904	-1.36409	0.0902141	0.484827	0.445903	2105	tags=37%, list=17%, signal=31%	HMOX1/ADORA2A/NPHS1/ADORA1/KCNK5/GNAI2/AQP9/ABCG2/AGT/SLC9A3R1/CLN3/NPR1/AVPR2/NEDD4L/AMN/ABCG5/ABCG8
BP	GO:0006687	glycosphingolipid metabolic process	56	-0.607083	-1.37297	0.0903522	0.484827	0.445903	1878	tags=30%, list=15%, signal=26%	UGT8/B4GALT3/ESYT3/CTSA/HEXB/BAX/GLA/SMPD3/ST6GALNAC6/B3GALT4/CERK/B4GALT5/GM2A/PSAP/ARSA/ST8SIA2/GLB1
CC	GO:0000118	histone deacetylase complex	64	0.481572	1.29263	0.090379	0.484827	0.445903	1756	tags=17%, list=14%, signal=15%	SATB2/CHD5/ZNHIT1/ANP32E/RCOR2/HDAC4/RBBP4/CHD4/RUVBL2/MTA2/BRD8
CC	GO:0019897	extrinsic component of plasma membrane	139	-0.505388	-1.28648	0.090411	0.484827	0.445903	2625	tags=35%, list=21%, signal=28%	FES/CDH13/RACGAP1/IQGAP1/CRKL/MYZAP/GNAI1/CNR2/CDK16/SMAD7/STAC2/KRAS/GNA13/ST14/SYAP1/ANXA1/OSBPL2/CNKSR2/CDH1/ESYT3/GNAS/GNG10/SRC/GNAI2/CDH4/RGS1/CDH11/PTK2B/GNG2/CDH18/FRK/SYTL1/S100A6/SCUBE1/HCK/RGS8/STYK1/SNAP91/KCNAB1/CDH2/LYN/BLK/SYTL3/CYTH1/ERRFI1/PLG/CAV2/GNGT1/CDH8
MF	GO:1990939	ATP-dependent microtubule motor activity	27	0.615582	1.40271	0.0904393	0.484827	0.445903	1991	tags=30%, list=16%, signal=25%	DYNC1H1/DNHD1/KIF3A/KIF20B/KIF5A/DNAH2/KIF16B/DNAH11
MF	GO:0008083	growth factor activity	105	-0.533157	-1.30941	0.0905233	0.484827	0.445903	1457	tags=24%, list=11%, signal=21%	HBEGF/NODAL/BMP5/MACC1/F2/AGT/PTN/IGF2/VEGFC/CXCL12/FGF8/FGF13/NENF/INHBB/PGF/BTC/GDF10/PDGFA/KITLG/HGF/ENDOU/NTF3/CSF1/CSPG5/AMH
BP	GO:0045620	negative regulation of lymphocyte differentiation	33	-0.646317	-1.36289	0.09062	0.484827	0.445903	2505	tags=33%, list=20%, signal=27%	SHH/CBFB/SMAD7/ANXA1/HLX/RUNX3/ZC3H12A/NRARP/BCL6/LOXL3/RC3H2
BP	GO:0060271	cilium assembly	306	0.358871	1.15149	0.0906986	0.484827	0.445903	1989	tags=21%, list=16%, signal=18%	MAPRE1/DYNC1H1/HSP90AA1/TBC1D32/TRIP11/CCDC96/CROCC/EHD3/ABCC4/BBS2/TTC30B/TBC1D30/TUBB4B/KIF27/CEP192/PTPN23/HSPB11/RFX3/RSPH9/TUBA1A/KIF3A/CEP164/CEP120/AKAP9/POC1B/TUBA4A/CCDC28B/NPHP4/DCTN1/NPHP1/DISC1/IQCB1/PLK4/CEP131/CEP250/ODF2/PPP2R1A/CCDC66/CEP152/CEP76/NEK1/IFT57/LRRC49/DNAI2/CFAP46/CDK5RAP2/FLNA/BBS5/FBF1/CEP41/SSNA1/WRAP73/WDR11/ARL13B/LAMA5/IFT81/DCTN2/IFT43/IFT22/ATAT1/TMEM80/FUZ/B…
BP	GO:0001954	positive regulation of cell-matrix adhesion	41	-0.621378	-1.36735	0.0907692	0.484827	0.445903	2606	tags=44%, list=20%, signal=35%	CDH13/IQGAP1/CD3E/CEACAM6/RIN2/EPB41L5/DAG1/COL16A1/ABL1/PTK2B/CDK6/SMAD3/PLEKHA2/EMP2/NRP1/CCL25/CSF1/PRKCZ
BP	GO:0001958	endochondral ossification	25	-0.685201	-1.38574	0.0909091	0.484827	0.445903	2254	tags=32%, list=18%, signal=26%	MEF2D/COL2A1/GNAS/PHOSPHO1/SMPD3/TMEM119/MMP14/COL1A1
BP	GO:0036075	replacement ossification	25	-0.685201	-1.38574	0.0909091	0.484827	0.445903	2254	tags=32%, list=18%, signal=26%	MEF2D/COL2A1/GNAS/PHOSPHO1/SMPD3/TMEM119/MMP14/COL1A1
BP	GO:0042554	superoxide anion generation	25	-0.683677	-1.38265	0.0909091	0.484827	0.445903	2229	tags=44%, list=18%, signal=36%	TGFB1/CYBB/PRKCD/GNAI2/SOD1/CRP/CYBA/NOX4/FPR2/ITGAM/PON3
BP	GO:0050435	amyloid-beta metabolic process	45	-0.614013	-1.35838	0.0909091	0.484827	0.445903	1003	tags=22%, list=8%, signal=21%	BIN1/REN/GSAP/EFNA1/EPHA4/APOE/BACE2/ACE/MGAT3/BACE1
MF	GO:0003779	actin binding	346	-0.442743	-1.2234	0.0914489	0.486647	0.447577	2356	tags=26%, list=19%, signal=22%	FMNL2/CORO1C/EVL/MYH11/MSRB1/LRRC10/BLOC1S6/SYNPO2L/MYO6/DAG1/MEFV/TMSB4X/XIRP2/TPM4/CORO2B/MYO1E/MARCKSL1/MYO1H/LCP1/ITGB1/PLS1/TNNC1/ABL1/LDB3/AJUBA/MYO10/LSP1/PSTPIP1/CAP2/USH1C/MYH7/MYH6/TNNI1/CXCR4/MISP/MYL2/KLHL2/MAEA/PPP1R9A/WIPF1/AIF1/MYL4/SPIRE2/FAM107A/AIF1L/TNNT2/MICALL2/ADCY8/TMOD4/TMOD3/BIN1/HIP1R/SYN1/TPM3/ALDOA/MYOM2/TTN/TRIOBP/SHTN1/EEF2/PKNOX2/FSCN1/ANTXR1/SPTBN5/GSN/WASF2/FBXO25…
BP	GO:0035924	cellular response to vascular endothelial growth factor stimulus	53	-0.607964	-1.36723	0.0914634	0.486647	0.447577	1173	tags=21%, list=9%, signal=19%	DAB2IP/DLL1/CADM4/VEGFC/MAPK14/DLL4/XDH/PGF/FLT3/NRP1/DCN
BP	GO:0072171	mesonephric tubule morphogenesis	53	-0.607976	-1.36725	0.0914634	0.486647	0.447577	2575	tags=34%, list=20%, signal=27%	SIX1/SHH/NPNT/PBX1/NOG/FGF1/WNT2B/KIF26B/WT1/PKD2/TACSTD2/AGT/GATA3/FGF8/CITED1/HES1/SOX9/LHX1
MF	GO:0016866	intramolecular transferase activity	24	-0.685683	-1.37735	0.0915141	0.486647	0.447577	405	tags=21%, list=3%, signal=20%	PGAM2/PMM1/LSS/PGM1/CYP2J2
BP	GO:0000715	nucleotide-excision repair, DNA damage recognition	21	0.647583	1.38046	0.0916031	0.486769	0.447689	2833	tags=38%, list=22%, signal=30%	RAD23B/COPS4/COPS8/RBX1/COPS3/COPS6/UBA52/DDB1
BP	GO:0061052	negative regulation of cell growth involved in cardiac muscle cell development	10	0.781089	1.41385	0.0917431	0.487163	0.448051	70	tags=10%, list=1%, signal=10%	RGS4
CC	GO:0043195	terminal bouton	46	0.525169	1.31387	0.091954	0.487931	0.448758	1690	tags=28%, list=13%, signal=25%	CPLX4/CPLX3/CALCA/SYT11/LRRK2/CPLX2/PTPRN2/CNGB1/UNC13A/NTRK2/CAD/SYNJ1/GRIN1
BP	GO:0032956	regulation of actin cytoskeleton organization	269	-0.451685	-1.22165	0.0920398	0.487992	0.448814	2337	tags=24%, list=18%, signal=20%	SERPINF2/EVL/PREX1/RHOB/LIMK1/SYNPO2L/ARF6/TMSB4X/SIGLEC15/PXN/CORO2B/PRKCD/RAC2/EPHA3/ABL1/GPM6B/NPHS1/CDC42EP1/PTGER4/PTK2B/PPP1R9A/CDK5/SMAD3/FZD10/CSF1R/SPIRE2/FAM107A/RAC3/ECT2/TRPM2/TACSTD2/F11R/TMOD4/HCK/TMOD3/BIN1/ARHGEF5/HIP1R/CELSR1/APOA1/ARHGEF19/TRIOBP/ELN/NOX4/PDXP/PPM1E/PIK3R1/SMIM22/FSCN1/CXCL12/SPTBN5/GSN/SWAP70/WASF2/ACTN2/ARPC1B/RGCC/EPS8/PDGFA/TMOD1/AVIL/TWF2/NTF3/NRP1/CDC42EP3
BP	GO:0045926	negative regulation of growth	184	-0.480571	-1.26291	0.0921053	0.487992	0.448814	1711	tags=22%, list=13%, signal=20%	CDA/RTN4R/WWC1/SIRT1/MYL2/PTPRS/YY1/CDK5/WT1/SMAD3/PLAC8/DCBLD2/FLCN/SEMA7A/VGLL4/CYP27B1/RBP4/SEMA3A/SMARCA2/TGFBR2/SEMA3D/NPR1/MAP2/FGF13/ALOX15B/SEMA3C/SFRP2/BCL6/DUSP10/ING5/PPT1/TMPRSS4/IP6K2/CDHR2/WFDC1/MYOZ1/LGMN/NRP1/WNT5A/MSX1/CDKN2C
MF	GO:0120020	cholesterol transfer activity	17	-0.733794	-1.39349	0.0922819	0.487992	0.448814	1846	tags=47%, list=15%, signal=40%	OSBPL2/NPC2/APOA4/APOA1/APOB/APOE/ABCG5/ABCG8
BP	GO:1900746	regulation of vascular endothelial growth factor signaling pathway	17	-0.733755	-1.39342	0.0922819	0.487992	0.448814	1467	tags=29%, list=12%, signal=26%	DAB2IP/DLL1/CADM4/XDH/DCN
BP	GO:0021575	hindbrain morphogenesis	36	-0.64196	-1.37916	0.0923318	0.487992	0.448814	2082	tags=33%, list=16%, signal=28%	XRCC1/ABL1/KIF14/CBLN1/CDK5/GLI1/DLL1/GNPAT/RORA/HES1/LHX1/MAP2K1
CC	GO:0034399	nuclear periphery	115	0.437627	1.26323	0.0924053	0.487992	0.448814	1723	tags=23%, list=14%, signal=20%	TEP1/SATB2/NUP205/NUP35/EIF6/ANAPC4/RGS12/NUP107/TPR/VIM/STAG1/DCAF7/NUP98/CASK/PSMA6/DGKQ/PHB2/RUNX1T1/CAD/NUP153/MBD1/HNRNPU/AHCTF1/TENM1/SMC3/RUVBL2/TELO2
BP	GO:0007059	chromosome segregation	276	0.367571	1.17053	0.0924595	0.487992	0.448814	2172	tags=20%, list=17%, signal=17%	TEX12/DYNC1H1/ANKRD31/APC/ANAPC4/EME1/SKA2/FBXW7/TRIP13/TPR/DIS3L2/FANCD2/NUDC/STAG1/AXIN2/RCC2/SETDB2/WAPL/SPDL1/PPP2R1A/FMN2/CHMP2B/PHB2/INO80/PSMG2/CDC6/CDK5RAP2/SIRT7/RIOK3/RAD51C/HNRNPU/KPNB1/PMF1/IK/MMS19/NCAPH2/SMC3/ESCO1/REC8/UVRAG/CHMP5/RRS1/DYNC1LI1/WRAP73/DCTN2/CCNB1IP1/KLHL22/MCMBP/RAB11A/MAP10/ERCC4/TUBG1/TNKS/AGO4/NAA50/MEIOB
BP	GO:0097202	activation of cysteine-type endopeptidase activity	12	-0.774135	-1.38508	0.0926573	0.487992	0.448814	494	tags=25%, list=4%, signal=24%	CIDEB/LGMN/PERP
BP	GO:0000466	maturation of 5.8S rRNA from tricistronic rRNA transcript (SSU-rRNA, 5.8S rRNA, LSU-rRNA)	23	0.673069	1.47782	0.0926882	0.487992	0.448814	3282	tags=61%, list=26%, signal=45%	ERI2/NOP14/UTP20/RRS1/KRI1/RPS21/FTSJ3/ABT1/EXOSC9/WDR12/NOL9/BOP1/NOP9/EXOSC8
BP	GO:0031047	gene silencing by RNA	135	0.405461	1.19861	0.0928571	0.487992	0.448814	1370	tags=21%, list=11%, signal=19%	NUP205/TDRD9/AGO1/ASZ1/NUP35/EIF6/DICER1/SEC13/NUP210/EIF4G1/NUP188/DDX6/DHX9/MAP2K2/NUP107/TPR/ESR1/SND1/ELAVL1/RBM4/NUP98/HENMT1/HELZ/PPP3CA/TDRD12/NUP155/CNOT11/NUP153
BP	GO:0006607	NLS-bearing protein import into nucleus	11	0.762469	1.40292	0.0929705	0.487992	0.448814	1501	tags=27%, list=12%, signal=24%	NUP35/IPO5/KPNB1
MF	GO:0015037	peptide disulfide oxidoreductase activity	11	0.761749	1.4016	0.0929705	0.487992	0.448814	2364	tags=55%, list=19%, signal=44%	PDIA6/PDIA4/PDIA5/PDIA3/TXN/GSR
BP	GO:1900037	regulation of cellular response to hypoxia	11	0.762329	1.40267	0.0929705	0.487992	0.448814	413	tags=18%, list=3%, signal=18%	HYOU1/CHCHD2
BP	GO:0048247	lymphocyte chemotaxis	29	-0.661786	-1.36386	0.0929853	0.487992	0.448814	881	tags=38%, list=7%, signal=35%	PIK3CG/CCL20/HSD3B7/ADAM10/PTK2B/CKLF/CXCL10/WNT5A/CXCL14/MSMP/CCL25
MF	GO:0032977	membrane insertase activity	12	0.744015	1.38783	0.0930233	0.487992	0.448814	2237	tags=50%, list=18%, signal=41%	COX18/EMC4/EMC9/EMC10/EMC2/MMGT1
BP	GO:0061450	trophoblast cell migration	12	0.743943	1.3877	0.0930233	0.487992	0.448814	853	tags=25%, list=7%, signal=23%	GJA1/CALR/C1QBP
CC	GO:0070469	respirasome	69	0.476968	1.28573	0.0930931	0.488011	0.448832	3237	tags=36%, list=25%, signal=27%	FOXRED1/UQCRC1/CYCS/CYC1/NDUFV2/NDUFV1/BCS1L/COX8A/UQCRQ/NDUFAF1/NDUFA5/UQCRHL/NDUFA13/SURF1/NDUFB2/NNT/NDUFA10/COX7A2/NDUFAB1/NDUFA12/UQCRFS1/NDUFB6/NDUFA11/NDUFS2/COX15
BP	GO:0032210	regulation of telomere maintenance via telomerase	48	0.521044	1.31086	0.0932945	0.48872	0.449483	2564	tags=38%, list=20%, signal=30%	XRN1/CCT3/CCT6A/CCT4/PRKCQ/TEN1/CCT8/ATR/HNRNPU/CCT7/CCT5/HNRNPA1/PNKP/TNKS/NAT10/NEK7/PINX1/TCP1
BP	GO:0043589	skin morphogenesis	10	-0.783391	-1.36737	0.0936396	0.488988	0.44973	374	tags=50%, list=3%, signal=49%	ITGA6/COL1A1/ERRFI1/COL1A2/ITGA2
BP	GO:0046643	regulation of gamma-delta T cell activation	10	-0.784678	-1.36961	0.0936396	0.488988	0.44973	155	tags=60%, list=1%, signal=59%	LEF1/NOD2/STAT5B/SYK/NCKAP1L/SOX4
BP	GO:0032615	interleukin-12 production	36	0.575508	1.36489	0.0936639	0.488988	0.44973	1095	tags=19%, list=9%, signal=18%	HSPD1/IL10/NFKB1/THBS1/C1QBP/ISL1/CCR7
BP	GO:0032655	regulation of interleukin-12 production	36	0.575508	1.36489	0.0936639	0.488988	0.44973	1095	tags=19%, list=9%, signal=18%	HSPD1/IL10/NFKB1/THBS1/C1QBP/ISL1/CCR7
CC	GO:0030132	clathrin coat of coated pit	14	0.706302	1.37286	0.0936768	0.488988	0.44973	1980	tags=43%, list=16%, signal=36%	CLTB/CLTC/AP2A1/SYNJ1/AP2A2/AP2B1
BP	GO:0008585	female gonad development	78	-0.567693	-1.34282	0.09375	0.489024	0.449763	1863	tags=26%, list=15%, signal=22%	COL9A3/ADCYAP1/SRC/SIRT1/WT1/SOD1/BAX/BRCA2/CYP19A1/GNRH1/ARRB1/BMPR1B/INHBB/FZD4/GAS2/MMP14/KITLG/PGR/DMC1/AMH
BP	GO:0016202	regulation of striated muscle tissue development	30	-0.655561	-1.36845	0.0940989	0.490081	0.450735	3224	tags=50%, list=25%, signal=37%	LMOD3/WNT3A/MTPN/FLOT1/MYOD1/TGFB1/SHH/PRKAA1/MEGF10/SMAD3/DLL1/WNT10B/LOX/IGF2/FGF8
BP	GO:0071326	cellular response to monosaccharide stimulus	103	0.449205	1.27392	0.0942237	0.490081	0.450735	1228	tags=14%, list=10%, signal=12%	RFX6/SLC39A14/GCG/CFTR/PDX1/SRF/ADCY5/OPA1/PTPRN2/RAB11FIP2/PPP3CA/SMARCA4/LRP5/ERN1
BP	GO:0071331	cellular response to hexose stimulus	103	0.449205	1.27392	0.0942237	0.490081	0.450735	1228	tags=14%, list=10%, signal=12%	RFX6/SLC39A14/GCG/CFTR/PDX1/SRF/ADCY5/OPA1/PTPRN2/RAB11FIP2/PPP3CA/SMARCA4/LRP5/ERN1
BP	GO:0120254	olefinic compound metabolic process	76	-0.569601	-1.34512	0.0942563	0.490081	0.450735	1683	tags=24%, list=13%, signal=21%	GPX4/CYP2A13/PLA2G4A/BMP5/ACOT8/PTGES/FAAH2/CYP2U1/HSD17B4/ALOX15B/CYP46A1/RDH11/CLCN2/ALDH8A1/TBXAS1/CYP2J2/CYP1A1/FADS2
BP	GO:0008544	epidermis development	221	-0.468823	-1.2517	0.0945083	0.490081	0.450735	2505	tags=26%, list=20%, signal=21%	SHH/TMEM79/FLOT2/IGFBP5/COL7A1/CBFB/ZFP36L1/KRT18/FZD3/KRT19/MYO6/RBP2/YAP1/CTSK/PLS1/IFT172/DSG2/ST14/SLC44A4/KAZN/MCOLN3/ANXA1/USH1C/MAFG/WDPCP/PTHLH/GLI1/SOD1/DSP/MYCL/TNFRSF19/DLL1/TGM5/CYP27B1/SLC9A3R1/WNT10B/PPHLN1/USH2A/TRIOBP/LGR5/ALOX15B/SOX21/KLF7/MYO7A/PDGFA/ERRFI1/HES1/INTU/LRTOMT/ABCA12/SOX9/DSC1/CTSV/PERP/WNT5A/SOSTDC1/MAP2K1
BP	GO:0090150	establishment of protein localization to membrane	285	0.360399	1.15203	0.0945732	0.490081	0.450735	2001	tags=18%, list=16%, signal=16%	SGTA/SEC16A/SEC61B/HSP90AA1/SRPRA/REEP2/SEC61G/SSR1/RAB3GAP2/RPL5/BBS2/HSPA5/RAB34/SRP9/SSR3/SEC61A1/HSPA4/COX18/SRP19/SRP72/NSG1/SSR2/TRAM1/SRP14/SRP54/CHM/GORASP2/EMC4/GRIPAP1/SCRIB/SEC62/RPS5/TIMM8B/YIF1B/NSF/EMC9/RPS9/SAMM50/SPTBN1/EMC10/BCS1L/EMC2/C2CD5/RPS13/RAB7A/ZFAND2B/SIL1/SRP68/BBS1/RAB11A/YWHAG/TIMM13
CC	GO:0005747	mitochondrial respiratory chain complex I	38	0.585683	1.41623	0.094588	0.490081	0.450735	3344	tags=37%, list=26%, signal=27%	FOXRED1/NDUFV2/NDUFV1/NDUFAF1/NDUFA5/NDUFA13/NDUFB2/NDUFA10/NDUFAB1/NDUFA12/NDUFB6/NDUFA11/NDUFS2/NDUFS1
CC	GO:0030964	NADH dehydrogenase complex	38	0.585683	1.41623	0.094588	0.490081	0.450735	3344	tags=37%, list=26%, signal=27%	FOXRED1/NDUFV2/NDUFV1/NDUFAF1/NDUFA5/NDUFA13/NDUFB2/NDUFA10/NDUFAB1/NDUFA12/NDUFB6/NDUFA11/NDUFS2/NDUFS1
CC	GO:0045271	respiratory chain complex I	38	0.585683	1.41623	0.094588	0.490081	0.450735	3344	tags=37%, list=26%, signal=27%	FOXRED1/NDUFV2/NDUFV1/NDUFAF1/NDUFA5/NDUFA13/NDUFB2/NDUFA10/NDUFAB1/NDUFA12/NDUFB6/NDUFA11/NDUFS2/NDUFS1
MF	GO:0015248	sterol transporter activity	29	-0.658484	-1.35706	0.0946166	0.490081	0.450735	1846	tags=31%, list=15%, signal=27%	OSBPL2/NPC2/APOA4/APOA1/APOB/APOE/OSBP2/ABCG5/ABCG8
BP	GO:0060119	inner ear receptor cell development	35	-0.648002	-1.38305	0.0947867	0.490349	0.450982	2005	tags=43%, list=16%, signal=36%	PLS1/GABRA5/USH1C/IFT88/WDPCP/SOD1/SLC9A3R1/ADGRV1/ATP8B1/TRIOBP/FZD2/MYO7A/HES1/LRTOMT/CTHRC1
MF	GO:0051287	NAD binding	46	-0.605235	-1.34264	0.0948012	0.490349	0.450982	1394	tags=20%, list=11%, signal=17%	AOX1/NUDT6/CYB5R3/GAPDH/ME2/SORD/GPD1/QDPR/HSD11B2
BP	GO:0031032	actomyosin structure organization	161	-0.488862	-1.26659	0.0949796	0.490386	0.451016	2442	tags=28%, list=19%, signal=23%	NRAP/EPB41L5/SERPINF2/EVL/MYH11/KRT19/LIMK1/SYNPO2L/PXN/CORO2B/ABL1/LDB3/MYH6/PTGER4/SRC/MYL2/PTK2B/TNNT1/PPP1R9A/SMAD3/CFLAR/ECT2/TACSTD2/TNNT2/F11R/TMOD4/TMOD3/CASQ1/ARHGEF5/APOA1/TTN/ELN/NOX4/PPM1E/PIK3R1/ARRB1/WASF2/ACTN2/RGCC/MYH3/TMOD1/MYOZ1/NRP1/TNNT3/PGM5
BP	GO:0001655	urogenital system development	273	-0.449404	-1.21749	0.0951792	0.490386	0.451016	2198	tags=26%, list=17%, signal=22%	WNK4/YAP1/PBX1/SMAD7/NOG/MYO1E/AQP11/FGF1/WNT2B/BMP7/JMJD6/NPHS1/ANXA1/FRAS1/IFT88/IRX2/AHI1/KIF26B/EPHB3/KIRREL3/ENPEP/WDPCP/RGN/CRIP1/C1GALT1/SOX11/SMAD5/SMAD1/WT1/GLI1/BAX/SMAD3/DACT2/CFLAR/PKD2/FRS2/SMAD6/FLCN/TACSTD2/CTSH/DLL1/AGT/RBP4/REN/GATA2/NID1/GATA3/LGR5/FGF8/ALOX15B/ANGPT1/PSAP/CA2/GPR4/EPHA4/ANGPT2/CITED1/PLAG1/KLF15/PDGFA/HOXA13/HES1/ACE/FOXF1/SOX9/BICC1/SOX4/WNT5A/LHX1/DCN/AMH
BP	GO:0001771	immunological synapse formation	11	0.759684	1.3978	0.0952381	0.490386	0.451016	2115	tags=55%, list=17%, signal=46%	LGALS3/CCR7/HAVCR2/DOCK8/CD6/DLG1
BP	GO:0042303	molting cycle	78	-0.565702	-1.33811	0.0952381	0.490386	0.451016	1208	tags=13%, list=10%, signal=12%	TNFRSF19/WNT10B/LGR5/SOX21/PDGFA/INTU/SOX9/WNT5A/EPS8L3/SOSTDC1
BP	GO:0042633	hair cycle	78	-0.565702	-1.33811	0.0952381	0.490386	0.451016	1208	tags=13%, list=10%, signal=12%	TNFRSF19/WNT10B/LGR5/SOX21/PDGFA/INTU/SOX9/WNT5A/EPS8L3/SOSTDC1
BP	GO:0051261	protein depolymerization	88	-0.555143	-1.32846	0.0952381	0.490386	0.451016	1073	tags=18%, list=8%, signal=17%	TMOD4/TMOD3/TRIOBP/PDXP/SPTBN5/FGF13/GSN/SWAP70/ACTN2/TRIM54/EPS8/CCSAP/TMOD1/CAMSAP1/AVIL/TWF2
BP	GO:0000244	spliceosomal tri-snRNP complex assembly	12	0.741701	1.38351	0.0953488	0.490386	0.451016	1637	tags=33%, list=13%, signal=29%	PRPF8/PRPF31/USP4/PRPF19
BP	GO:0036376	sodium ion export across plasma membrane	10	-0.779151	-1.35996	0.0954064	0.490386	0.451016	1085	tags=30%, list=9%, signal=27%	ATP1B1/SLC8A1/ATP1A2
BP	GO:0051014	actin filament severing	10	-0.779534	-1.36063	0.0954064	0.490386	0.451016	728	tags=30%, list=6%, signal=28%	GMFG/GSN/AVIL
BP	GO:0019320	hexose catabolic process	45	-0.607166	-1.34323	0.0955316	0.490688	0.451293	1459	tags=24%, list=11%, signal=22%	TPI1/PFKFB2/TKFC/PFKM/ALDOA/GAPDH/GALT/ENO3/KHK/PGM1/GLB1
MF	GO:0004867	serine-type endopeptidase inhibitor activity	48	-0.602634	-1.35201	0.0955994	0.490695	0.4513	1682	tags=33%, list=13%, signal=29%	SPINT1/A2ML1/COL28A1/AGT/ITIH2/SERPINA10/ITIH5/SERPINA1/A2M/SERPIND1/SERPING1/SERPINH1/WFDC1/PZP/AMBP/ANOS1
MF	GO:0005267	potassium channel activity	90	0.444944	1.25355	0.095679	0.490762	0.451362	999	tags=12%, list=8%, signal=11%	KCNG3/GRIK1/KCNK16/KCNJ15/ABCC8/KCND1/KCNJ12/KCNJ1/KCNJ5/KCNIP3/KCNQ5
BP	GO:0032508	DNA duplex unwinding	95	0.439949	1.25728	0.0961538	0.492855	0.453287	2833	tags=31%, list=22%, signal=24%	CHD5/HELQ/RAD23B/DHX9/ASCC3/MNAT1/DQX1/SSBP1/ERCC6/INO80/RBX1/CHD4/RAD51/RUVBL2/RAD54L/GTF2H3/CHTF18/RFC3/CHD7/MCMDC2/GTF2H5/RECQL/RAD54B/CHD8/ERCC2/DHX36/UBA52/RFC2/DDB1
BP	GO:0032963	collagen metabolic process	79	-0.559574	-1.32827	0.0962963	0.493243	0.453643	2073	tags=35%, list=16%, signal=30%	CTSK/PPARG/F2R/ITGB1/LARP6/CREB3L1/CTSB/ADAMTS2/CST3/FAP/CBX8/SMPD3/F2/CTSS/CTSD/MRC2/MMP23B/P3H2/RGCC/MMP14/MFAP4/COL1A1/ERRFI1/SERPINH1/COL1A2/ITGA2/MMP11/MMP2
BP	GO:0090022	regulation of neutrophil chemotaxis	23	-0.686996	-1.36893	0.0965058	0.493973	0.454315	14	tags=26%, list=0%, signal=26%	DAPK2/MOSPD2/RAC2/C5AR1/TIRAP/LBP
BP	GO:0050927	positive regulation of positive chemotaxis	21	-0.699905	-1.37563	0.0968801	0.495546	0.455761	1434	tags=29%, list=11%, signal=25%	SMAD3/VEGFC/CXCL12/PGF/NTF3/ITGA2
BP	GO:0034472	snRNA 3'-end processing	18	0.680754	1.39061	0.0970149	0.495891	0.456079	2569	tags=33%, list=20%, signal=27%	INTS8/INTS5/EXOSC6/INTS12/EXOSC5/EXOSC9
BP	GO:0006362	transcription elongation from RNA polymerase I promoter	24	0.625092	1.39285	0.0972569	0.495935	0.456119	2963	tags=50%, list=23%, signal=38%	TAF1C/CCNH/MNAT1/ERCC6/GTF2H3/POLR1C/POLR1A/GTF2H5/ERCC2/POLR1B/POLR1E/POLR2L
BP	GO:1901017	negative regulation of potassium ion transmembrane transporter activity	14	-0.754089	-1.37363	0.0973913	0.495935	0.456119	2004	tags=43%, list=16%, signal=36%	KCNE4/SUMO1/KCNAB1/ACTN2/NEDD4L/CAV1
[truncated: 5,935 more rows]

## Sheet: sigTerms
ONTOLOGY	ID	Description	setSize	enrichmentScore	NES	pvalue	p.adjust	qvalues	rank	leading_edge	core_enrichment
[truncated: 203 more rows]

## Sheet: sigTerms_sorted
Category	ONTOLOGY	ID	Description	setSize	enrichmentScore	NES	pvalue	p.adjust	qvalues	rank	leading_edge	core_enrichment
[truncated: 212 more rows]
