# Supplementary material for: An automated feeding system for the African killifish reveals the impact of diet on lifespan and allows scalable assessment of associative learning
Source: eLife. 2022 Nov 10;11:e69008. doi: 10.7554/eLife.69008 (PMC9788828; doi:10.7554/eLife.69008)
Supplement: Figure 5—source data 7. [file elife-69008-fig5-data7.xlsx]

## Sheet: AllTerms
ONTOLOGY	ID	Description	setSize	enrichmentScore	NES	pvalue	p.adjust	qvalues	rank	leading_edge	core_enrichment
CC	GO:0044391	ribosomal subunit	160	0.836768	2.18716	1.16638e-08	5.27262e-05	5.08768e-05	1229	tags=44%, list=10%, signal=41%	RPLP0/RPL37/RPS11/RPL21/RPS21/RPS19/RPS9/RPS27A/RPS16/RPS20/RPS23/RPL28/RPL13/RPL13A/RPS26/RPS13/RPL12/RPL11/RPS2/RPL14/RPL23/RPS8/RPL31/RPL27A/RPS3/RPL7A/RPS14/RPL10A/RPS6/RPL15/RPL30/RPS12/RPSA/RPL8/RPS25/RPS15/RPL39/RPL29/RPL4/RPL9/RPL35/RPL37A/RPL10/RPS15A/RPS7/RPL3/RPL26/RPS4X/RPL23A/RPS17/RPL18A/RPL6/UBA52/EIF2A/RPS5/RPLP1/RPS18/RPS3A/RPL24/RPL36A/MRPL4/RPS28/RPS10/RPL22/RPL36/RPL7/RPS29/RP…
MF	GO:0003735	structural constituent of ribosome	142	0.844489	2.17903	1.4287e-08	5.27262e-05	5.08768e-05	1229	tags=49%, list=10%, signal=45%	RPLP0/RPL37/RPS11/RPL21/RPS21/RPS19/RPS9/RPS27A/RPS16/RPS20/RPS23/RPL28/RPL13/RPL13A/RPS26/RPS13/RPL12/RPL11/RPS2/RPL14/RPL23/RPS8/RPL31/RPL27A/RPS3/RPL7A/RPS14/RPL10A/RPS6/RPL15/RPL30/RPS12/RPSA/RPL8/RPS25/RPS15/RPL39/RPL29/RPL4/RPL9/RPL35/RPL37A/RPL10/RPS15A/RPS7/RPL3/RPL26/RPS4X/RPL23A/RPS17/RPL18A/RPL6/UBA52/RPS5/RPLP1/RPS18/RPS3A/RPL24/RPL36A/MRPL4/RPS28/RPS10/RPL22/RPL36/RPL7/RPS29/RPL18/RP…
BP	GO:0000184	nuclear-transcribed mRNA catabolic process, nonsense-mediated decay	113	0.871604	2.18633	4.02231e-08	9.89622e-05	9.5491e-05	1229	tags=66%, list=10%, signal=60%	RPLP0/RPL37/HELZ2/RPS11/RPL21/RPS21/RPS19/RPS9/RPS27A/RPS16/RPS20/RPS23/RPL28/RPL13/RPL13A/RPS26/RPS13/RPL12/RPL11/RPS2/RPL14/SMG7/RPL23/RPS8/RPL31/NBAS/RPL27A/RPS3/RPL7A/RPS14/RPL10A/RPS6/RPL15/RPL30/RPS12/RPSA/RPL8/RPS25/RPS15/RPL39/RPL29/RPL4/RPL9/RPL35/RPL37A/RPL10/RPS15A/RPS7/RPL3/RPL26/RPS4X/RPL23A/RPS17/RPL18A/RPL6/UBA52/RPS5/RPLP1/RPS18/RPS3A/RPL24/PABPC1/UPF1/RPL36A/RPS28/RPS10/RPL22/RPL…
CC	GO:0022626	cytosolic ribosome	89	0.878452	2.12444	1.53819e-07	0.000283834	0.000273879	1229	tags=81%, list=10%, signal=74%	RPLP0/RPL37/RPS11/RPL21/RPS21/RPS19/RPS9/RPS27A/RPS16/RPS20/RPS23/RPL28/RPL13/RPL13A/RPS26/RPS13/RPL12/RPL11/RPS2/RPL14/RPL23/RPS8/RPL31/RPL27A/RPS3/RPL7A/RPS14/RPL10A/RPS6/RPL15/RPL30/RPS12/PPARGC1A/RPSA/RPL8/RPS25/RPS15/RPL39/RPL29/RPL4/RPL9/RPL35/RPL37A/RPL10/RPS15A/RPS7/RPL3/RPL26/RPS4X/RPL23A/RPS17/RPL18A/RPL6/UBA52/EIF2A/RPS5/RPLP1/RPS18/RPS3A/RPL24/RPL36A/RPS28/RPS10/RPL22/RPL36/APOD/RPL7/…
BP	GO:0006614	SRP-dependent cotranslational protein targeting to membrane	89	0.874159	2.11406	2.94997e-07	0.000435475	0.000420201	1281	tags=79%, list=10%, signal=71%	RPLP0/RPL37/RPS11/RPL21/RPS21/RPS19/RPS9/RPS27A/RPS16/RPS20/RPS23/RPL28/RPL13/RPL13A/RPS26/RPS13/RPL12/RPL11/RPS2/RPL14/RPL23/RPS8/RPL31/RPL27A/RPS3/RPL7A/RPS14/RPL10A/RPS6/RPL15/RPL30/RPS12/RPSA/RPL8/RPS25/RPS15/RPL39/RPL29/RPL4/RPL9/RPL35/RPL37A/RPL10/RPS15A/RPS7/RPL3/RPL26/RPS4X/RPL23A/RPS17/RPL18A/RPL6/UBA52/RPS5/RPLP1/RPS18/RPS3A/RPL24/RPL36A/RPS28/RPS10/RPL22/RPL36/RPL7/RPS29/RPL18/RPS24/RP…
BP	GO:0006413	translational initiation	171	0.806427	2.11595	4.4089e-07	0.000499666	0.000482139	1492	tags=52%, list=12%, signal=47%	EIF3H/RPLP0/RPL37/RPS11/RPL21/EIF3C/RPS21/RPS19/RPS9/RPS27A/RPS16/RPS20/RPS23/RPL28/RPL13/RPL13A/RPS26/RPS13/RPL12/EIF2AK3/RPL11/RPS2/RPL14/RPL23/RPS8/RPL31/RPL27A/RPS3/CSDE1/EIF3B/RPL7A/RPS14/RPL10A/RPS6/RPL15/RPL30/RPS12/RPSA/HSPB1/RPL8/RPS25/RPS15/EIF3A/RPL39/RPL29/RPL4/RPL9/RPL35/RPL37A/RPL10/RPS15A/RPS7/RPL3/RPL26/RPS4X/RPL23A/EIF2S3/RPS17/RPL18A/RPL6/UBA52/EIF2A/RPS5/RPLP1/RPS18/RPS3A/RPL24…
BP	GO:0072599	establishment of protein localization to endoplasmic reticulum	106	0.855598	2.13117	4.73873e-07	0.000499666	0.000482139	1281	tags=68%, list=10%, signal=62%	RPLP0/RPL37/RYR2/RPS11/RPL21/RPS21/RPS19/RPS9/RPS27A/RPS16/RPS20/RPS23/RPL28/RPL13/RPL13A/RPS26/RPS13/RPL12/RPL11/RPS2/RPL14/RPL23/RPS8/RPL31/RPL27A/RPS3/RPL7A/RPS14/RPL10A/RPS6/RPL15/RPL30/RPS12/RPSA/RPL8/RPS25/RPS15/RPL39/RPL29/RPL4/RPL9/RPL35/RPL37A/RPL10/RPS15A/RPS7/RPL3/RPL26/RPS4X/RPL23A/RPS17/RPL18A/RPL6/UBA52/RAB3GAP2/RPS5/RPLP1/RPS18/RPS3A/RPL24/RPL36A/RPS28/RPS10/RPL22/RPL36/RPL7/RPS29/…
BP	GO:0070972	protein localization to endoplasmic reticulum	129	0.829492	2.11559	1.02697e-06	0.000947506	0.000914272	1281	tags=58%, list=10%, signal=53%	RPLP0/RPL37/RYR2/RPS11/RPL21/RPS21/RPS19/RPS9/RPS27A/RPS16/RPS20/RPS23/RPL28/RPL13/RPL13A/RPS26/RPS13/RPL12/RPL11/RPS2/RPL14/RPL23/RPS8/RPL31/RPL27A/RPS3/RPL7A/RPS14/RPL10A/RPS6/RPL15/RPL30/RPS12/RPSA/RPL8/RPS25/RPS15/RPL39/RPL29/LRRK2/RPL4/RPL9/RPL35/RPL37A/RPL10/RPS15A/RPS7/RPL3/RPL26/RPS4X/RPL23A/RPS17/RPL18A/RPL6/UBA52/RAB3GAP2/RPS5/RPLP1/RPS18/RPS3A/RPL24/RPL36A/SEC16A/RPS28/RPS10/RPL22/SEC1…
BP	GO:0006613	cotranslational protein targeting to membrane	94	0.866749	2.12142	1.90963e-06	0.00156611	0.00151118	1281	tags=74%, list=10%, signal=67%	RPLP0/RPL37/RPS11/RPL21/RPS21/RPS19/RPS9/RPS27A/RPS16/RPS20/RPS23/RPL28/RPL13/RPL13A/RPS26/RPS13/RPL12/RPL11/RPS2/RPL14/RPL23/RPS8/RPL31/RPL27A/RPS3/RPL7A/RPS14/RPL10A/RPS6/RPL15/RPL30/RPS12/RPSA/RPL8/RPS25/RPS15/RPL39/RPL29/RPL4/RPL9/RPL35/RPL37A/RPL10/RPS15A/RPS7/RPL3/RPL26/RPS4X/RPL23A/RPS17/RPL18A/RPL6/UBA52/RPS5/RPLP1/RPS18/RPS3A/RPL24/RPL36A/RPS28/RPS10/RPL22/RPL36/RPL7/RPS29/RPL18/RPS24/RP…
CC	GO:0098802	plasma membrane signaling receptor complex	144	-0.756006	-1.9629	3.06221e-06	0.00226022	0.00218094	750	tags=17%, list=6%, signal=16%	GRID2/TFRC/B2M/TRAF2/GRIN1/GRIK2/TLR1/CHRNA9/IL2RB/GRIA2/SKAP1/CD6/ZAP70/SHISA9/CNIH2/SYK/ITGB2/ITGB3/CD3E/CSF2RB/CD3D/ABHD6/GRIN2C/CNTFR
BP	GO:0045047	protein targeting to ER	102	0.863378	2.13617	3.813e-06	0.00255852	0.00246878	1281	tags=69%, list=10%, signal=62%	RPLP0/RPL37/RPS11/RPL21/RPS21/RPS19/RPS9/RPS27A/RPS16/RPS20/RPS23/RPL28/RPL13/RPL13A/RPS26/RPS13/RPL12/RPL11/RPS2/RPL14/RPL23/RPS8/RPL31/RPL27A/RPS3/RPL7A/RPS14/RPL10A/RPS6/RPL15/RPL30/RPS12/RPSA/RPL8/RPS25/RPS15/RPL39/RPL29/RPL4/RPL9/RPL35/RPL37A/RPL10/RPS15A/RPS7/RPL3/RPL26/RPS4X/RPL23A/RPS17/RPL18A/RPL6/UBA52/RPS5/RPLP1/RPS18/RPS3A/RPL24/RPL36A/RPS28/RPS10/RPL22/RPL36/RPL7/RPS29/RPL18/RPS24/RP…
CC	GO:0098797	plasma membrane protein complex	439	-0.596413	-1.7144	4.45513e-06	0.00274028	0.00264416	1581	tags=19%, list=12%, signal=17%	ITGA6/KCNF1/RAMP2/NCF1/GNB3/IL6ST/C7/KCNIP1/ATP6AP1/EFCAB7/APBB1IP/ITGA10/PGM5/KCNB2/CHRNA1/PSEN2/SGCZ/GJD2/GNAI1/VTN/DLG2/GNAQ/CDH18/OLFM2/MR1/CACNA1S/AMIGO1/ATP1A1/SLC7A5/KCNAB2/LRRC52/GRIK4/SMAD7/ADAM8/GJA8/CDH13/HLA-A/GRID2/CYBA/KCNIP3/CDH4/CTTN/TFRC/SLC9A3R1/B2M/SSPN/SCN8A/TRAF2/HLA-G/GNAZ/GRIN1/GRIK2/HLA-DPA1/SNAP25/TLR1/CHRNA9/CORO1C/IL2RB/KCNIP2/GRIA2/SKAP1/GNAT2/CD6/ZAP70/SHISA9/ATP1B4/C…
CC	GO:0022627	cytosolic small ribosomal subunit	38	0.894342	1.97253	7.85686e-06	0.00441812	0.00426315	1203	tags=84%, list=9%, signal=76%	RPS11/RPS21/RPS19/RPS9/RPS27A/RPS16/RPS20/RPS23/RPS26/RPS13/RPS2/RPS8/RPS3/RPS14/RPS6/RPS12/RPSA/RPS25/RPS15/RPS15A/RPS7/RPS4X/RPS17/UBA52/EIF2A/RPS5/RPS18/RPS3A/RPS28/RPS10/RPS29/RPS24
BP	GO:0022613	ribonucleoprotein complex biogenesis	383	0.651647	1.80368	8.38012e-06	0.00441812	0.00426315	1435	tags=20%, list=11%, signal=18%	GLUL/EIF3H/RPLP0/YTHDC1/EIF3C/RPS21/RPS19/RPS9/RPS16/SIRT7/RPL13A/ADAR/RPL11/RPS2/RPL14/PIH1D2/RPS8/EIF3B/RPL7A/RPS14/RPL10A/RPS6/RPSA/RPS25/RPS15/EIF3A/NSA2/GTPBP10/RPUSD2/RPL35/BRIX1/AGO4/RPL10/RPS7/GTPBP4/HSP90AB1/RPL3/RPL26/RPL23A/YBEY/URB2/DICER1/EIF2S3/GTF3A/RPS17/UTP20/RPL6/HEATR1/PPAN/EIF2A/RPS5/MDN1/RPL24/WDR74/GNL2/HELQ/RPS28/RPS10/DDX10/RCL1/MRTO4/RPL7/DDX21/DDX28/PDCD11/CHD7/DDX1/MRM1…
BP	GO:0050865	regulation of cell activation	372	-0.605852	-1.72737	9.26964e-06	0.00456128	0.00440129	1427	tags=24%, list=11%, signal=22%	IGLL1/MIF/CST7/PRKCQ/GPR183/LAMP1/BCL6/INHBA/CD27/PARP3/TYRO3/TMIGD2/CSK/TESPA1/THBS1/SIRPA/DUSP3/MLH1/BLOC1S3/FCRL3/GRN/LOXL3/EBI3/CD55/FANCD2/TEC/TEC/SAMSN1/SMAD7/ADAM8/CEBPA/CRTAM/GATA2/HLA-A/SLAMF8/XBP1/TIRAP/PLEK/CNR2/DMTN/NRARP/PDPN/TFRC/CD200/RAC2/HAVCR2/WNT5A/BLK/SELP/IL1RL1/CD2/HLA-G/CTSC/HLA-DPA1/MYB/RHOH/VAV1/SLC46A2/TIGIT/CD6/CD276/ZAP70/PTPRC/RUNX3/IRF1/PGLYRP2/ADA/SYK/ITGB2/TLR9/TNF…
BP	GO:0042254	ribosome biogenesis	263	0.68787	1.89081	2.54977e-05	0.0113817	0.0109825	1433	tags=24%, list=11%, signal=21%	GLUL/RPLP0/RPS21/RPS19/RPS9/RPS16/SIRT7/RPL11/RPS2/RPL14/PIH1D2/RPS8/RPL7A/RPS14/RPL10A/RPS6/RPSA/RPS25/RPS15/NSA2/GTPBP10/RPUSD2/RPL35/BRIX1/RPL10/RPS7/GTPBP4/RPL3/RPL26/RPL23A/YBEY/URB2/GTF3A/RPS17/UTP20/RPL6/HEATR1/PPAN/EIF2A/RPS5/MDN1/RPL24/WDR74/GNL2/HELQ/RPS28/RPS10/DDX10/RCL1/MRTO4/RPL7/DDX21/DDX28/PDCD11/CHD7/MRM1/RPS24/RPL27/RPL35A/WDR36/TRAF7/KRR1
CC	GO:0015934	large ribosomal subunit	97	0.832312	2.03918	2.62146e-05	0.0113817	0.0109825	1431	tags=42%, list=11%, signal=38%	RPLP0/RPL37/RPL21/RPL28/RPL13/RPL13A/RPL12/RPL11/RPL14/RPL23/RPL31/RPL27A/RPL7A/RPL10A/RPL15/RPL30/RPL8/RPL39/RPL29/RPL4/RPL9/RPL35/RPL37A/RPL10/RPL3/RPL26/RPL23A/RPL18A/RPL6/RPLP1/RPL24/RPL36A/MRPL4/RPL22/RPL36/RPL7/RPL18/RPL27/RPLP2/RPL35A/RPL32
BP	GO:0050778	positive regulation of immune response	424	-0.579212	-1.66194	3.53118e-05	0.0135927	0.013116	1195	tags=20%, list=9%, signal=19%	LTA/ABI1/CSK/TESPA1/MR1/ELMO1/CFB/DUSP3/MLH1/FCRL3/CD55/TEC/TEC/CMKLR1/CPB2/C4BPA/ADAM8/TBK1/CRTAM/GATA2/PSMB6/HLA-A/XBP1/TFRC/HAVCR2/WNT5A/BLK/SH2D1A/RBCK1/PLA2G1B/MED1/B2M/PIK3CD/TRAF2/HLA-G/IL17F/ARPC1B/RASGRP1/SLAMF6/HLA-DPA1/MYB/C5AR1/FCGR1A/VAV1/MFAP4/SKAP1/CRP/PSMB9/CFI/PSMB7/CD276/KLHL6/ZAP70/CLU/PTPRC/A2M/LPXN/WAS/PAX5/ADA/SYK/ITGB2/TNFSF13B/PSME2/SASH3/SERPING1/C1QA/INPP5D/CFP/LCP2/CYFI…
BP	GO:0006612	protein targeting to membrane	175	0.735075	1.93971	3.67645e-05	0.0135927	0.013116	1281	tags=45%, list=10%, signal=41%	PDZK1/GDI1/RPLP0/RPL37/RPS11/RPL21/RPS21/RPS19/RPS9/RPS27A/RPS16/RPS20/RPS23/RPL28/RPL13/RPL13A/RPS26/RPS13/RPL12/RPL11/RPS2/RPL14/RPL23/RPS8/RPL31/RPL27A/RPS3/RPL7A/RPS14/RPL10A/RPS6/RPL15/RPL30/RPS12/RPSA/RPL8/RPS25/RPS15/RPL39/RPL29/RPL4/ANK3/RPL9/RPL35/RPL37A/RPL10/RPS15A/RPS7/RPL3/RPL26/RPS4X/RPL23A/RPS17/RPL18A/NACA2/RPL6/PARD3/UBA52/RPS5/RPLP1/RPS18/RPS3A/RPL24/RPL36A/RPS28/RPS10/TAOK2/RPL…
BP	GO:0019221	cytokine-mediated signaling pathway	497	-0.555148	-1.61675	3.68317e-05	0.0135927	0.013116	1284	tags=16%, list=10%, signal=15%	TAX1BP1/BCL6/CD27/CXCL8/KRAS/ICAM1/LTA/NCAM1/CCR4/CXCL2/CAMK2B/USP18/IL2RG/CIITA/IL9R/JAGN1/EBI3/GHR/CDIP1/TEC/TEC/CMKLR1/CEBPA/TBK1/PLVAP/PSMB6/ROBO1/HLA-A/SMARCA4/CARD14/WNT5A/RBCK1/MED1/B2M/XCR1/PIK3CD/IL1RL1/TRAF2/HLA-G/IL17F/HLA-DPA1/CCR1/UGCG/IL2RB/FCGR1A/VAV1/IL36G/PSMB9/PSMB7/CXCL10/SIGIRR/SAA1/PTPRC/IRF1/CSF3R/IFNAR1/ANXA2/IL5RA/SYK/ITGB2/TNFSF13B/PSME2/FASLG/INPP5D/LCP1/CSF1/EPOR/CXCR3/…
CC	GO:0043235	receptor complex	325	-0.613563	-1.72946	4.03766e-05	0.0141914	0.0136936	1018	tags=16%, list=8%, signal=15%	CD200R1/EBI3/DDR2/GRIK4/GHR/ADGRV1/GABRR2/LOXL4/TRIL/PLXNA2/PTPRB/PLXNC1/GRID2/NRP2/GABRB1/TFRC/FLT4/B2M/TRAF2/GRIN1/GRIK2/TLR1/CHRNA9/GRM7/IL2RB/NTRK2/GRIA2/SKAP1/TLR7/GABRR1/CD6/ZAP70/SHISA9/CNIH2/CSF3R/GABRG3/ADRA2A/IL5RA/PTPRN2/SYK/ITGB2/FCRL5/GABRD/ITGB3/CD3E/CSF2RB/CD3D/CSF1R/TNFRSF1B/ABHD6/GRIN2C/CNTFR
BP	GO:0002694	regulation of leukocyte activation	344	-0.604056	-1.70405	4.64246e-05	0.0155754	0.0150291	1427	tags=24%, list=11%, signal=22%	IGLL1/MIF/CST7/PRKCQ/GPR183/LAMP1/BCL6/INHBA/CD27/PARP3/TYRO3/TMIGD2/CSK/TESPA1/THBS1/SIRPA/DUSP3/MLH1/BLOC1S3/FCRL3/GRN/LOXL3/EBI3/CD55/FANCD2/SAMSN1/SMAD7/ADAM8/CEBPA/CRTAM/GATA2/HLA-A/SLAMF8/XBP1/TIRAP/CNR2/NRARP/TFRC/CD200/RAC2/HAVCR2/WNT5A/BLK/IL1RL1/CD2/HLA-G/CTSC/HLA-DPA1/MYB/RHOH/VAV1/SLC46A2/TIGIT/CD6/CD276/ZAP70/PTPRC/RUNX3/IRF1/PGLYRP2/ADA/SYK/ITGB2/TLR9/TNFSF13B/LRRC32/SASH3/CD84/INPP…
CC	GO:0005840	ribosome	193	0.711378	1.89119	5.82863e-05	0.0183698	0.0177255	1254	tags=40%, list=10%, signal=37%	EIF3H/RPLP0/RPL37/GCN1/RPS11/RPL21/RPS21/RPS19/RPS9/RPS27A/RPS16/RPS20/RPS23/RPL28/RPL13/RPL13A/RPS26/RPS13/RPL12/RPL11/RPS2/RPL14/RPL23/RPS8/RPL31/RPL27A/RPS3/RPL7A/RPS14/RPL10A/RPS6/RPL15/RPL30/RPS12/PPARGC1A/RPSA/RPL8/RPS25/RPS15/RPL39/RPL29/RPL4/RPL9/RPL35/RPL37A/RPL10/RPS15A/RPS7/RPL3/RPL26/RPS4X/RPL23A/RPS17/RPL18A/RPL6/UBA52/BTF3/EIF2A/RPS5/RPLP1/RPS18/RPS3A/RPL24/RPL36A/MRPL4/RPS28/RPS10/…
BP	GO:0019080	viral gene expression	181	0.73892	1.95345	6.10712e-05	0.0183698	0.0177255	1254	tags=44%, list=10%, signal=40%	IFITM3/RPLP0/RPL37/NUP210/RPS11/RPL21/RPS21/RPS19/RPS9/RPS27A/RPS16/RPS20/RPS23/RPL28/RPL13/RPL13A/RPS26/RPS13/RPL12/RPL11/RPS2/RPL14/RPL23/RPS8/RPL31/RPL27A/RPS3/CSDE1/EIF3B/RPL7A/RPS14/SEH1L/CCNT1/RPL10A/RPS6/RPL15/RPL30/RPS12/RPSA/RPL8/RPS25/RPS15/EIF3A/RPL39/RPL29/RPL4/RPL9/RPL35/RPL37A/RPL10/CTDP1/RPS15A/RPS7/NUP205/RPL3/RPL26/RPS4X/RPL23A/RPS17/RPL18A/RPL6/UBA52/RPS5/RPLP1/RPS18/RPS3A/RPL24…
BP	GO:0000956	nuclear-transcribed mRNA catabolic process	188	0.728868	1.9347	6.22199e-05	0.0183698	0.0177255	1229	tags=41%, list=10%, signal=38%	RPLP0/RPL37/HELZ2/RPS11/RPL21/RPS21/RPS19/RPS9/RPS27A/RPS16/RPS20/RPS23/RPL28/RPL13/RPL13A/RPS26/RPS13/RPL12/RPL11/RPS2/RPL14/SMG7/RPL23/RPS8/RPL31/NBAS/RPL27A/RPS3/CSDE1/RPL7A/RPS14/RPL10A/RPS6/RPL15/RPL30/RPS12/RPSA/RPL8/RPS25/RPS15/RPL39/RPL29/RPL4/RPL9/RPL35/RPL37A/RPL10/RPS15A/RPS7/RPL3/RPL26/RPS4X/RPL23A/RPS17/RPL18A/RPL6/UBA52/RPS5/RPLP1/RPS18/RPS3A/RPL24/PABPC1/UPF1/RPL36A/RPS28/RPS10/RPL…
BP	GO:0002250	adaptive immune response	246	-0.653621	-1.79682	6.83299e-05	0.0190611	0.0183925	1575	tags=30%, list=12%, signal=27%	CLEC4C/IL6ST/C7/ORAI1/TAP2/IGLL1/FUT7/CLEC4M/PRKCQ/GPR183/BCL6/CD27/ICAM1/LTA/PARP3/CSK/UNG/JAG1/MR1/MLH1/LOXL3/EBI3/CD55/TEC/TEC/SAMSN1/SMAD7/C4BPA/HLA-A/TFRC/CD48/HAVCR2/SH2D1A/B2M/PIK3CD/IL1RL1/RNF19B/TRAF2/HLA-G/CTSC/IL17F/SLAMF6/HLA-DPA1/LY9/SWAP70/SKAP1/CRP/CFI/CD6/CTSS/KLHL6/ZAP70/CLU/PTPRC/IRF1/WAS/ADA/SYK/TNFSF13B/SASH3/SERPING1/CD84/C1QA/INPP5D/HLA-DPB1/CD3E/CLEC10A/ITK/IL4I1/C1QC/CD274…
BP	GO:0050867	positive regulation of cell activation	223	-0.664638	-1.80651	6.97262e-05	0.0190611	0.0183925	1427	tags=26%, list=11%, signal=24%	IGLL1/MIF/PRKCQ/GPR183/LAMP1/BCL6/CD27/TMIGD2/CSK/TESPA1/THBS1/SIRPA/MLH1/BLOC1S3/FCRL3/EBI3/CD55/ADAM8/CEBPA/GATA2/HLA-A/XBP1/TIRAP/PLEK/TFRC/HAVCR2/WNT5A/SELP/IL1RL1/CD2/HLA-G/CTSC/HLA-DPA1/MYB/RHOH/VAV1/CD6/CD276/ZAP70/PTPRC/RUNX3/ADA/SYK/ITGB2/TLR9/TNFSF13B/SASH3/INPP5D/HLA-DPB1/NCKAP1L/AIF1/CD3E/CCR7/CD274/CCL3/RUNX1/HAMP/CLEC4D
BP	GO:0050851	antigen receptor-mediated signaling pathway	178	-0.680794	-1.79491	7.63289e-05	0.0201208	0.0194151	1142	tags=21%, list=9%, signal=19%	CSK/TESPA1/DUSP3/FCRL3/TEC/TEC/PSMB6/HLA-A/BLK/SH2D1A/RBCK1/PIK3CD/HLA-DPA1/SKAP1/PSMB9/PSMB7/CD276/KLHL6/ZAP70/PTPRC/LPXN/WAS/PAX5/ADA/SYK/PSME2/INPP5D/LCP2/PSMB8/HLA-DPB1/NCKAP1L/CD3E/ITK/CCR7/CD3D/RUNX1/THEMIS2
BP	GO:0019083	viral transcription	164	0.743108	1.94244	9.01153e-05	0.0229359	0.0221314	1254	tags=47%, list=10%, signal=43%	IFITM3/RPLP0/RPL37/NUP210/RPS11/RPL21/RPS21/RPS19/RPS9/RPS27A/RPS16/RPS20/RPS23/RPL28/RPL13/RPL13A/RPS26/RPS13/RPL12/RPL11/RPS2/RPL14/RPL23/RPS8/RPL31/RPL27A/RPS3/RPL7A/RPS14/SEH1L/CCNT1/RPL10A/RPS6/RPL15/RPL30/RPS12/RPSA/RPL8/RPS25/RPS15/RPL39/RPL29/RPL4/RPL9/RPL35/RPL37A/RPL10/CTDP1/RPS15A/RPS7/NUP205/RPL3/RPL26/RPS4X/RPL23A/RPS17/RPL18A/RPL6/UBA52/RPS5/RPLP1/RPS18/RPS3A/RPL24/RPL36A/RPS28/RPS1…
BP	GO:0006402	mRNA catabolic process	325	0.636465	1.74685	0.000113846	0.0279181	0.0269389	1284	tags=29%, list=10%, signal=26%	PABPC4/IGF2BP1/IGF2BP2/RPLP0/RPL37/HELZ2/RPS11/RPL21/RPS21/RPS19/RPS9/RPS27A/RPS16/RPS20/RPS23/RPL28/RPL13/RPL13A/RPS26/RPS13/RPL12/FASTKD5/RPL11/RPS2/RPL14/SMG7/RPL23/CSDC2/RPS8/RPL31/NBAS/RPL27A/RPS3/CSDE1/RPL7A/RPS14/RPL10A/RPS6/RPL15/RPL30/RPS12/RPSA/HSPB1/RPL8/RBM24/RPS25/RPS15/RPL39/RPL29/RPL4/RPL9/RPL35/RPL37A/AGO4/RPL10/RPS15A/RPS7/AXIN2/RPL3/RPL26/RPS4X/RPL23A/FUS/RPS17/RPL18A/RPL6/UBA52…
BP	GO:0002253	activation of immune response	316	-0.600235	-1.68235	0.000117255	0.0279181	0.0269389	1169	tags=19%, list=9%, signal=18%	ABI1/CSK/TESPA1/ELMO1/CFB/DUSP3/FCRL3/CD55/TEC/TEC/CMKLR1/CPB2/C4BPA/TBK1/PSMB6/HLA-A/BLK/SH2D1A/RBCK1/PIK3CD/ARPC1B/HLA-DPA1/C5AR1/FCGR1A/VAV1/MFAP4/SKAP1/CRP/PSMB9/CFI/PSMB7/CD276/KLHL6/ZAP70/CLU/PTPRC/A2M/LPXN/WAS/PAX5/ADA/SYK/PSME2/SERPING1/C1QA/INPP5D/CFP/LCP2/CYFIP2/PSMB8/HLA-DPB1/NCKAP1L/CD3E/CLEC10A/ITK/C1QC/CCR7/CD3D/RUNX1/THEMIS2/CLEC4D
BP	GO:0002696	positive regulation of leukocyte activation	217	-0.663316	-1.79468	0.00012943	0.0298537	0.0288066	1427	tags=26%, list=11%, signal=23%	IGLL1/MIF/PRKCQ/GPR183/LAMP1/BCL6/CD27/TMIGD2/CSK/TESPA1/THBS1/SIRPA/MLH1/BLOC1S3/FCRL3/EBI3/CD55/ADAM8/CEBPA/GATA2/HLA-A/XBP1/TIRAP/TFRC/HAVCR2/WNT5A/IL1RL1/CD2/HLA-G/CTSC/HLA-DPA1/MYB/RHOH/VAV1/CD6/CD276/ZAP70/PTPRC/RUNX3/ADA/SYK/ITGB2/TLR9/TNFSF13B/SASH3/INPP5D/HLA-DPB1/NCKAP1L/AIF1/CD3E/CCR7/CD274/CCL3/RUNX1/HAMP/CLEC4D
BP	GO:0043523	regulation of neuron apoptotic process	162	-0.68446	-1.79982	0.000164376	0.0367654	0.0354759	1243	tags=18%, list=10%, signal=16%	KRAS/DLX1/CITED1/TYRO3/NMNAT1/NEFL/GRN/AGAP2/EGLN3/ADAM8/TGFB3/SIGMAR1/GRID2/MAG/BDNF/TERT/GRIK2/MYBL2/MYB/C5AR1/NTRK2/GDNF/FASLG/LGMN/CDK5R1/SNCB/CCL3/APOE/CNTFR
BP	GO:0051402	neuron apoptotic process	193	-0.659877	-1.75853	0.000306638	0.0665675	0.0642326	1243	tags=16%, list=10%, signal=15%	KRAS/DLX1/CITED1/TYRO3/NMNAT1/NEFL/GRN/AGAP2/EGLN3/ADAM8/TGFB3/SIGMAR1/RB1/GRID2/MAG/POU4F3/BDNF/TERT/GRIK2/MYBL2/MYB/C5AR1/NTRK2/GDNF/FASLG/LGMN/CDK5R1/SNCB/CCL3/APOE/CNTFR
BP	GO:0006401	RNA catabolic process	353	0.604287	1.67188	0.000405653	0.0846483	0.0816792	1284	tags=27%, list=10%, signal=25%	PABPC4/IGF2BP1/IGF2BP2/RPLP0/RPL37/HELZ2/RPS11/RPL21/RPS21/RPS19/RPS9/RPS27A/RPS16/RPS20/RPS23/RPL28/RPL13/RPL13A/RPS26/RPS13/RPL12/FASTKD5/RPL11/RPS2/RPL14/SMG7/RPL23/CSDC2/RPS8/RPL31/NBAS/RPL27A/RPS3/CSDE1/RPL7A/RPS14/RPL10A/RPS6/RPL15/RPL30/RPS12/RPSA/HSPB1/RPL8/RBM24/RPS25/RPS15/RPL39/RPL29/RPL4/RPL9/RPL35/RPL37A/AGO4/RPL10/RPS15A/RPS7/AXIN2/RPL3/RPL26/RPS4X/RPL23A/LRPPRC/FUS/RPS17/RPL18A/RPL…
BP	GO:0002274	myeloid leukocyte activation	487	-0.529965	-1.53938	0.000412863	0.0846483	0.0816792	1824	tags=27%, list=14%, signal=24%	CTSA/DNAJC5/LBP/RHOA/IL18RAP/S100P/ORM1/CD59/LAMTOR2/GNS/SERPINB6/RHOG/CNR1/CTSB/S100A13/RAP1B/C3/CBL/DYNC1LI1/SYNGR1/FRK/VAT1/ARSA/QSOX1/BIN2/ITGAL/LRG1/DNASE1/RAB7A/MVP/NPC2/CLEC4C/DOK3/PGLYRP1/SLC27A2/CYFIP1/DOCK2/ATG7/CEACAM6/NEU1/CYB5R3/MIF/NDRG1/ARSB/CST7/PRSS3/ACTR2/LAMP1/PIGR/CXCL8/TLR3/MOSPD2/GAA/STBD1/GSN/THBS1/SIRPA/HEXB/BRI3/GRN/CD53/KCNAB2/CD55/CD93/RAB10/GMFG/B4GALT1/SNCA/ADAM8/CTSD…
MF	GO:0015399	primary active transmembrane transporter activity	42	0.828724	1.83455	0.000447616	0.0892933	0.0861613	637	tags=14%, list=5%, signal=14%	ABCC12/CFTR/ABCA4/ABCG4/ABCD2/ABCC4
BP	GO:0046638	positive regulation of alpha-beta T cell differentiation	29	-0.844924	-1.74654	0.000492283	0.0954833	0.0921341	461	tags=28%, list=4%, signal=27%	MYB/ZAP70/RUNX3/ADA/SYK/SASH3/NCKAP1L/RUNX1
BP	GO:1901215	negative regulation of neuron death	160	-0.672374	-1.76098	0.000504518	0.0954833	0.0921341	1243	tags=18%, list=10%, signal=16%	KRAS/DLX1/CITED1/TYRO3/NMNAT1/NEFL/CD200R1/GRN/AGAP2/SNCA/ADAM8/TGFB3/MAG/CD200/BDNF/VPS35/TERT/TRAF2/GRIK2/C5AR1/NTRK2/GDNF/LGMN/CSF1/SNCB/APOE/TNFRSF1B/CNTFR
BP	GO:0002521	leukocyte differentiation	366	-0.557638	-1.5838	0.000614197	0.113335	0.109359	1337	tags=20%, list=11%, signal=19%	GPR183/TUSC2/BCL6/INHBA/CD27/TLR3/FZD7/TYRO3/TESPA1/MR1/FCRL3/LOXL3/JAGN1/TAL1/MAFB/FANCD2/SMAD7/NRROS/ADAM8/CEBPA/CRTAM/GATA2/SLAMF8/XBP1/RB1/FASN/NRARP/TFRC/BLK/SIGLEC15/MED1/B2M/LYL1/PIK3CD/CD2/HLA-G/ZBTB46/SLAMF6/CCR1/MYB/MFNG/LY9/RHOH/VAV1/SLC46A2/IKZF1/ZAP70/ADGRG3/PTPRC/RUNX3/IRF1/PGLYRP2/ANXA2/PREX1/HDAC9/ADA/SYK/CA2/TLR9/SASH3/INPP5D/CSF1/PTGER4/NCKAP1L/CD3E/ITK/C1QC/SPI1/CCR7/CD3D/IRF8/…
BP	GO:0042255	ribosome assembly	52	0.788439	1.79021	0.000663952	0.119528	0.115335	1090	tags=38%, list=9%, signal=35%	RPLP0/RPS19/RPL11/RPS14/RPSA/RPS15/BRIX1/RPL10/RPL3/RPL23A/RPL6/PPAN/EIF2A/RPS5/MDN1/RPL24/RPS28/RPS10/MRTO4/DDX28
CC	GO:0015935	small ribosomal subunit	65	0.839495	1.96806	0.000807658	0.141936	0.136958	1203	tags=49%, list=9%, signal=45%	RPS11/RPS21/RPS19/RPS9/RPS27A/RPS16/RPS20/RPS23/RPS26/RPS13/RPS2/RPS8/RPS3/RPS14/RPS6/RPS12/RPSA/RPS25/RPS15/RPS15A/RPS7/RPS4X/RPS17/UBA52/EIF2A/RPS5/RPS18/RPS3A/RPS28/RPS10/RPS29/RPS24
BP	GO:0046635	positive regulation of alpha-beta T cell activation	36	-0.818397	-1.73011	0.000858579	0.147376	0.142207	994	tags=36%, list=8%, signal=33%	EBI3/CD55/HLA-A/MYB/ZAP70/PTPRC/RUNX3/ADA/SYK/SASH3/NCKAP1L/CD3E/RUNX1
CC	GO:0008328	ionotropic glutamate receptor complex	44	-0.781021	-1.71299	0.000923588	0.154932	0.149498	518	tags=25%, list=4%, signal=24%	DLG2/OLFM2/GRIK4/GRID2/GRIN1/GRIK2/GRIA2/SHISA9/CNIH2/ABHD6/GRIN2C
BP	GO:0034724	DNA replication-independent nucleosome organization	29	-0.831986	-1.71979	0.00100758	0.160262	0.15464	1203	tags=31%, list=9%, signal=28%	UBN1/ASF1A/CENPK/CENPQ/CENPI/CENPT/CENPN/MIS18A/CENPP
BP	GO:0007597	blood coagulation, intrinsic pathway	16	-0.895542	-1.68321	0.0010197	0.160262	0.15464	599	tags=50%, list=5%, signal=48%	F9/PRCP/GP1BA/A2M/SERPING1/GP9/GP1BB/F11
MF	GO:0019955	cytokine binding	91	-0.763113	-1.86171	0.00103993	0.160262	0.15464	1124	tags=31%, list=9%, signal=28%	CCR4/THBS1/IL2RG/EBI3/GHR/NRROS/TGFB3/NRP2/PDPN/XCR1/IL1RL1/TRAF2/IL17F/CCR1/IL2RB/UCMA/A2M/CSF3R/IFNAR1/IL5RA/LRRC32/CXCR3/ITGB3/TWSG1/CCR7/CSF1R/TNFRSF1B/CNTFR
BP	GO:0007215	glutamate receptor signaling pathway	44	-0.778657	-1.7078	0.00104221	0.160262	0.15464	954	tags=23%, list=8%, signal=21%	GRIK4/GRID2/GRM8/GRIN1/GRIK2/HOMER2/GRM7/GRIA2/CDK5R1/GRIN2C
BP	GO:0034080	CENP-A containing nucleosome assembly	21	-0.876543	-1.73506	0.00113484	0.167525	0.161649	862	tags=33%, list=7%, signal=31%	CENPK/CENPQ/CENPI/CENPT/CENPN/MIS18A/CENPP
BP	GO:0061641	CENP-A containing chromatin organization	21	-0.876543	-1.73506	0.00113484	0.167525	0.161649	862	tags=33%, list=7%, signal=31%	CENPK/CENPQ/CENPI/CENPT/CENPN/MIS18A/CENPP
BP	GO:0051249	regulation of lymphocyte activation	285	-0.579678	-1.6135	0.00123165	0.178251	0.171999	1427	tags=24%, list=11%, signal=21%	IGLL1/MIF/PRKCQ/GPR183/LAMP1/BCL6/INHBA/CD27/PARP3/TYRO3/TMIGD2/CSK/TESPA1/SIRPA/DUSP3/MLH1/BLOC1S3/FCRL3/LOXL3/EBI3/CD55/FANCD2/SAMSN1/SMAD7/ADAM8/CRTAM/HLA-A/SLAMF8/XBP1/TIRAP/NRARP/TFRC/RAC2/HAVCR2/BLK/CD2/HLA-G/HLA-DPA1/MYB/RHOH/VAV1/SLC46A2/TIGIT/CD6/CD276/ZAP70/PTPRC/RUNX3/IRF1/PGLYRP2/ADA/SYK/TLR9/TNFSF13B/LRRC32/SASH3/INPP5D/HLA-DPB1/NCKAP1L/AIF1/CD3E/TWSG1/CCR7/CD274/RUNX1/CLNK/TNFRSF1B
BP	GO:0090150	establishment of protein localization to membrane	285	0.608781	1.67868	0.00138563	0.19324	0.186462	1281	tags=29%, list=10%, signal=27%	PDZK1/AMN/GDI1/RPLP0/RPL37/RPS11/RPL21/RPS21/RPS19/RPS9/RPS27A/RPS16/RPS20/RPS23/RPL28/RPL13/RPL13A/RPS26/RPS13/RPL12/RPL11/RPS2/RPL14/RPL23/RPS8/RPL31/RPL27A/RPS3/RPL7A/RPS14/RPL10A/RPS6/RPL15/RPL30/RPS12/RPSA/RPL8/RPS25/RPS15/RPL39/RPL29/RPL4/ANK3/RPL9/RPL35/RPL37A/RPL10/RPS15A/RPS7/RPL3/RPL26/RPS4X/RPL23A/RPS17/RPL18A/NACA2/RPL6/PARD3/UBA52/RAB3GAP2/RPS5/RPLP1/RPS18/RPS3A/RPL24/RPL36A/SEC16A/R…
MF	GO:0004177	aminopeptidase activity	31	-0.823356	-1.70951	0.00139867	0.19324	0.186462	74	tags=10%, list=1%, signal=10%	NAALADL1/METAP2/F11
BP	GO:0006956	complement activation	43	-0.777785	-1.69871	0.00141376	0.19324	0.186462	2036	tags=53%, list=16%, signal=45%	RGCC/CD59/CFH/C3/C4B/C8A/C7/IGLL1/VTN/CFB/CD55/CPB2/C4BPA/C5AR1/MFAP4/CRP/CFI/CLU/A2M/SERPING1/C1QA/CFP/C1QC
BP	GO:0002429	immune response-activating cell surface receptor signaling pathway	260	-0.583044	-1.60423	0.00146987	0.193734	0.186939	1169	tags=18%, list=9%, signal=17%	ABI1/CSK/TESPA1/ELMO1/DUSP3/FCRL3/TEC/TEC/CMKLR1/PSMB6/HLA-A/BLK/SH2D1A/RBCK1/PIK3CD/ARPC1B/HLA-DPA1/C5AR1/FCGR1A/VAV1/SKAP1/PSMB9/PSMB7/CD276/KLHL6/ZAP70/PTPRC/LPXN/WAS/PAX5/ADA/SYK/PSME2/INPP5D/LCP2/CYFIP2/PSMB8/HLA-DPB1/NCKAP1L/CD3E/CLEC10A/ITK/CCR7/CD3D/RUNX1/THEMIS2/CLEC4D
BP	GO:0002757	immune response-activating signal transduction	260	-0.583044	-1.60423	0.00146987	0.193734	0.186939	1169	tags=18%, list=9%, signal=17%	ABI1/CSK/TESPA1/ELMO1/DUSP3/FCRL3/TEC/TEC/CMKLR1/PSMB6/HLA-A/BLK/SH2D1A/RBCK1/PIK3CD/ARPC1B/HLA-DPA1/C5AR1/FCGR1A/VAV1/SKAP1/PSMB9/PSMB7/CD276/KLHL6/ZAP70/PTPRC/LPXN/WAS/PAX5/ADA/SYK/PSME2/INPP5D/LCP2/CYFIP2/PSMB8/HLA-DPB1/NCKAP1L/CD3E/CLEC10A/ITK/CCR7/CD3D/RUNX1/THEMIS2/CLEC4D
BP	GO:0050852	T cell receptor signaling pathway	145	-0.673713	-1.75446	0.00160481	0.202766	0.195654	1142	tags=20%, list=9%, signal=18%	CSK/TESPA1/DUSP3/TEC/TEC/PSMB6/HLA-A/SH2D1A/RBCK1/PIK3CD/HLA-DPA1/SKAP1/PSMB9/PSMB7/CD276/ZAP70/PTPRC/WAS/ADA/PSME2/INPP5D/LCP2/PSMB8/HLA-DPB1/CD3E/ITK/CCR7/CD3D/THEMIS2
CC	GO:0022625	cytosolic large ribosomal subunit	47	0.870017	1.92392	0.00160752	0.202766	0.195654	1431	tags=85%, list=11%, signal=76%	RPLP0/RPL37/RPL21/RPL28/RPL13/RPL13A/RPL12/RPL11/RPL14/RPL23/RPL31/RPL27A/RPL7A/RPL10A/RPL15/RPL30/RPL8/RPL39/RPL29/RPL4/RPL9/RPL35/RPL37A/RPL10/RPL3/RPL26/RPL23A/RPL18A/RPL6/RPLP1/RPL24/RPL36A/RPL22/RPL36/RPL7/RPL18/RPL27/RPLP2/RPL35A/RPL32
BP	GO:0006364	rRNA processing	197	0.653152	1.74586	0.00162081	0.202766	0.195654	1433	tags=22%, list=11%, signal=20%	RPS21/RPS19/RPS9/RPS16/SIRT7/RPL11/RPS2/RPL14/PIH1D2/RPS8/RPL7A/RPS14/RPL10A/RPS6/RPS25/RPS15/NSA2/RPUSD2/RPL35/RPS7/GTPBP4/RPL26/YBEY/RPS17/UTP20/HEATR1/MDN1/WDR74/HELQ/RPS28/DDX10/RCL1/MRTO4/RPL7/DDX21/PDCD11/CHD7/MRM1/RPS24/RPL27/RPL35A/WDR36/KRR1
BP	GO:1903131	mononuclear cell differentiation	281	-0.575447	-1.60235	0.00175415	0.21301	0.205538	1337	tags=22%, list=11%, signal=20%	GPR183/TUSC2/BCL6/INHBA/CD27/FZD7/TYRO3/TESPA1/MR1/FCRL3/LOXL3/MAFB/FANCD2/SMAD7/ADAM8/CRTAM/SLAMF8/XBP1/FASN/NRARP/BLK/MED1/B2M/LYL1/PIK3CD/CD2/HLA-G/ZBTB46/SLAMF6/MYB/MFNG/LY9/RHOH/VAV1/SLC46A2/IKZF1/ZAP70/ADGRG3/PTPRC/RUNX3/IRF1/PGLYRP2/PREX1/HDAC9/ADA/SYK/TLR9/SASH3/INPP5D/CSF1/PTGER4/NCKAP1L/CD3E/ITK/SPI1/CCR7/CD3D/IRF8/CSF1R/RUNX1/PIR
BP	GO:0070997	neuron death	286	-0.576953	-1.60547	0.00176041	0.21301	0.205538	1243	tags=18%, list=10%, signal=16%	KRAS/DKK1/DLX1/CITED1/TYRO3/NMNAT1/NEFL/CD200R1/GRN/SLC9A1/AGAP2/EGLN3/SNCA/ADAM8/TBK1/TGFB3/SIGMAR1/RB1/GRID2/MAG/CD200/POU4F3/WNT5A/BDNF/CHP1/VPS35/TERT/TRAF2/DDIT4/GRIK2/MYBL2/MYB/C5AR1/NTRK2/DHCR24/GDNF/CLU/BAG5/ITGB2/FASLG/LGMN/C1QA/CSF1/DPYSL4/CDK5R1/SNCB/CCL3/APOE/TNFRSF1B/SARM1/CNTFR
BP	GO:0000272	polysaccharide catabolic process	22	0.874881	1.71494	0.00195666	0.228239	0.220233	476	tags=14%, list=4%, signal=13%	INS/CHIA/PHKA2
BP	GO:0140448	signaling receptor ligand precursor processing	25	0.894276	1.83936	0.00196381	0.228239	0.220233	47	tags=12%, list=0%, signal=12%	PCSK2/PCSK1/SCG5
BP	GO:0019722	calcium-mediated signaling	150	-0.622546	-1.6211	0.00197904	0.228239	0.220233	1344	tags=23%, list=11%, signal=21%	P2RY12/ANK2/CXCL8/SLC8A2/CCR4/BCAP31/FKBP1B/PPP3R1/EFHB/SLC9A1/CMKLR1/CDH13/PLEK/DMTN/CHP1/SELP/XCR1/GRIN1/CCR1/HOMER2/GPR143/ZAP70/PTPRC/NEUROD2/ADA/SYK/TMEM38A/P2RY11/CXCR3/DMD/CHP2/CD3E/CCR7/CCL3/GRIN2C
BP	GO:0006911	phagocytosis, engulfment	45	-0.764785	-1.68625	0.00208316	0.233254	0.225072	1126	tags=42%, list=9%, signal=39%	RHOG/C3/BIN2/XKR8/IGLL1/GSN/THBS1/ELMO1/GATA2/RAC2/RHOH/FCGR1A/XKR5/ITGB2/SH3BP1/MARCO/NCKAP1L/AIF1/ARHGAP25
BP	GO:0002768	immune response-regulating cell surface receptor signaling pathway	283	-0.573723	-1.59643	0.00208573	0.233254	0.225072	1358	tags=19%, list=11%, signal=18%	PRKCQ/PHPT1/ACTR2/PIGR/KRAS/ABI1/CSK/TESPA1/ELMO1/DUSP3/PPP3R1/CD200R1/FCRL3/TEC/TEC/CMKLR1/PSMB6/HLA-A/BLK/SH2D1A/RBCK1/PIK3CD/HLA-G/ARPC1B/HLA-DPA1/C5AR1/FCGR1A/VAV1/SKAP1/PSMB9/PSMB7/CD276/KLHL6/ZAP70/PTPRC/LPXN/WAS/PAX5/ADA/SYK/PSME2/INPP5D/LCP2/CYFIP2/PSMB8/HLA-DPB1/NCKAP1L/CD3E/CLEC10A/ITK/CCR7/CD3D/RUNX1/THEMIS2/CLEC4D
BP	GO:0043374	CD8-positive, alpha-beta T cell differentiation	10	-0.934222	-1.64415	0.00214223	0.235997	0.227719	281	tags=40%, list=2%, signal=39%	RUNX3/IRF1/NCKAP1L/RUNX1
BP	GO:1900117	regulation of execution phase of apoptosis	14	0.920681	1.72278	0.00226129	0.24191	0.233425	320	tags=21%, list=3%, signal=21%	GCG/FAP/PTGIS
CC	GO:0098878	neurotransmitter receptor complex	46	-0.76112	-1.69274	0.00226145	0.24191	0.233425	518	tags=24%, list=4%, signal=23%	DLG2/OLFM2/GRIK4/GRID2/GRIN1/GRIK2/GRIA2/SHISA9/CNIH2/ABHD6/GRIN2C
BP	GO:0009134	nucleoside diphosphate catabolic process	11	-0.937072	-1.68517	0.00242548	0.243148	0.234619	7	tags=18%, list=0%, signal=18%	ENTPD5/ENTPD3
BP	GO:0097028	dendritic cell differentiation	29	-0.815212	-1.68512	0.00242648	0.243148	0.234619	648	tags=21%, list=5%, signal=20%	BLK/HLA-G/ZBTB46/SPI1/CCR7/IRF8
MF	GO:0008066	glutamate receptor activity	23	-0.858727	-1.71847	0.00242929	0.243148	0.234619	954	tags=35%, list=8%, signal=32%	GRIK4/GRID2/GRM8/GRIN1/GRIK2/GRM7/GRIA2/GRIN2C
BP	GO:0002764	immune response-regulating signaling pathway	285	-0.564357	-1.57086	0.00244267	0.243148	0.234619	1358	tags=19%, list=11%, signal=18%	PRKCQ/PHPT1/ACTR2/PIGR/KRAS/ABI1/CSK/TESPA1/ELMO1/DUSP3/PPP3R1/CD200R1/FCRL3/TEC/TEC/CMKLR1/PSMB6/HLA-A/BLK/SH2D1A/RBCK1/PIK3CD/HLA-G/ARPC1B/HLA-DPA1/C5AR1/FCGR1A/VAV1/SKAP1/PSMB9/PSMB7/CD276/KLHL6/ZAP70/PTPRC/LPXN/WAS/PAX5/ADA/SYK/PSME2/INPP5D/LCP2/CYFIP2/PSMB8/HLA-DPB1/NCKAP1L/CD3E/CLEC10A/ITK/CCR7/CD3D/RUNX1/THEMIS2/CLEC4D
BP	GO:1901214	regulation of neuron death	249	-0.583461	-1.60524	0.0024646	0.243148	0.234619	1243	tags=18%, list=10%, signal=17%	KRAS/DKK1/DLX1/CITED1/TYRO3/NMNAT1/NEFL/CD200R1/GRN/AGAP2/EGLN3/SNCA/ADAM8/TBK1/TGFB3/SIGMAR1/GRID2/MAG/CD200/WNT5A/BDNF/CHP1/VPS35/TERT/TRAF2/DDIT4/GRIK2/MYBL2/MYB/C5AR1/NTRK2/DHCR24/GDNF/CLU/ITGB2/FASLG/LGMN/C1QA/CSF1/CDK5R1/SNCB/CCL3/APOE/TNFRSF1B/SARM1/CNTFR
BP	GO:0043524	negative regulation of neuron apoptotic process	111	-0.705628	-1.76496	0.00247795	0.243148	0.234619	1243	tags=19%, list=10%, signal=17%	KRAS/DLX1/CITED1/TYRO3/NMNAT1/NEFL/GRN/AGAP2/ADAM8/TGFB3/MAG/BDNF/TERT/GRIK2/C5AR1/NTRK2/GDNF/LGMN/SNCB/APOE/CNTFR
BP	GO:0071826	ribonucleoprotein complex subunit organization	175	0.649909	1.71498	0.00250362	0.243148	0.234619	1435	tags=21%, list=11%, signal=19%	EIF3H/RPLP0/YTHDC1/EIF3C/RPS19/RPL13A/ADAR/RPL11/PIH1D2/EIF3B/RPS14/RPSA/RPS15/EIF3A/BRIX1/AGO4/RPL10/HSP90AB1/RPL3/RPL23A/DICER1/EIF2S3/RPL6/PPAN/RPS5/MDN1/RPL24/RPS28/RPS10/MRTO4/DDX28/DDX1/DHX9/EIF3M/TRAF7/CELF2
BP	GO:1905521	regulation of macrophage migration	29	-0.812012	-1.6785	0.00260892	0.247705	0.239017	1426	tags=41%, list=11%, signal=37%	MIF/P2RY12/MST1/THBS1/CD200R1/CMKLR1/SLAMF8/CD200/C5AR1/CSF1/CCL3/CSF1R
BP	GO:0006605	protein targeting	375	0.569704	1.57143	0.00264828	0.247705	0.239017	1281	tags=23%, list=10%, signal=22%	PDZK1/FZD5/GDI1/RPLP0/RPL37/RPS11/RPL21/RPS21/RPS19/RPS9/RPS27A/RPS16/RPS20/RPS23/RPL28/RPL13/RPL13A/RPS26/RPS13/RPL12/RPL11/RPS2/RPL14/VPS13D/RPL23/RPS8/RPL31/RPL27A/RPS3/RPL7A/RPS14/RPL10A/RPS6/RPL15/RPL30/VPS13A/RPS12/CROT/RPSA/RPL8/RPS25/RPS15/RPL39/RPL29/LRRK2/RPL4/ANK3/RPL9/RPL35/RPL37A/RPL10/RPS15A/RPS7/RPL3/RPL26/RPS4X/RPL23A/RPS17/RPL18A/NACA2/RPL6/PARD3/UBA52/AP1S3/MPV17/RPS5/RPLP1/RPS1…
BP	GO:1903039	positive regulation of leukocyte cell-cell adhesion	148	-0.645451	-1.67763	0.00265383	0.247705	0.239017	1407	tags=27%, list=11%, signal=24%	FUT7/PRKCQ/BCL6/CD27/ICAM1/TMIGD2/CSK/TESPA1/SIRPA/EBI3/CD55/ADAM8/HLA-A/XBP1/TFRC/HAVCR2/SELP/HLA-G/HLA-DPA1/MYB/RHOH/VAV1/SKAP1/CD6/CD276/ZAP70/PTPRC/RUNX3/ADA/SYK/ITGB2/TNFSF13B/SASH3/HLA-DPB1/NCKAP1L/AIF1/CD3E/CCR7/CD274/RUNX1
BP	GO:0050853	B cell receptor signaling pathway	46	-0.756745	-1.68301	0.00269698	0.247705	0.239017	1478	tags=34%, list=12%, signal=30%	CD38/SH2B2/IGLL1/FCRL3/TEC/TEC/BLK/PIK3CD/KLHL6/PTPRC/LPXN/PAX5/SYK/NCKAP1L/ITK/RUNX1
BP	GO:0051568	histone H3-K4 methylation	48	0.776346	1.73143	0.00271835	0.247705	0.239017	1065	tags=19%, list=8%, signal=17%	GCG/KMT2C/SETD1A/KMT2A/GFI1/KMT2E/PRDM9/DYDC1/ASH1L
BP	GO:0042273	ribosomal large subunit biogenesis	65	0.79413	1.86171	0.00285223	0.256735	0.24773	1402	tags=37%, list=11%, signal=33%	RPLP0/RPL11/RPL14/RPL7A/RPL10A/NSA2/RPL35/BRIX1/RPL10/GTPBP4/RPL3/RPL26/RPL23A/GTF3A/RPL6/PPAN/MDN1/RPL24/WDR74/MRTO4/RPL7/DDX28/RPL35A/TRAF7
BP	GO:0002275	myeloid cell activation involved in immune response	413	-0.513509	-1.47076	0.00292206	0.259853	0.250738	2066	tags=26%, list=16%, signal=22%	CTSA/DNAJC5/LBP/RHOA/S100P/ORM1/CD59/LAMTOR2/GNS/SERPINB6/RHOG/CTSB/S100A13/RAP1B/C3/CBL/DYNC1LI1/SYNGR1/FRK/VAT1/ARSA/QSOX1/BIN2/ITGAL/LRG1/DNASE1/RAB7A/MVP/NPC2/CLEC4C/DOK3/PGLYRP1/SLC27A2/CYFIP1/DOCK2/ATG7/CEACAM6/NEU1/CYB5R3/MIF/ARSB/PRSS3/ACTR2/LAMP1/PIGR/MOSPD2/GAA/STBD1/GSN/SIRPA/HEXB/BRI3/GRN/CD53/KCNAB2/CD55/CD93/RAB10/GMFG/B4GALT1/ADAM8/CTSD/GATA2/LAMP2/CD63/PTPRB/CYBA/GLIPR1/RAC2/HAVCR…
BP	GO:0072376	protein activation cascade	26	-0.839523	-1.68166	0.00300804	0.261204	0.252042	599	tags=31%, list=5%, signal=29%	F9/PRCP/GP1BA/A2M/SERPING1/GP9/GP1BB/F11
BP	GO:0072378	blood coagulation, fibrin clot formation	26	-0.839523	-1.68166	0.00300804	0.261204	0.252042	599	tags=31%, list=5%, signal=29%	F9/PRCP/GP1BA/A2M/SERPING1/GP9/GP1BB/F11
CC	GO:0000775	chromosome, centromeric region	166	-0.57588	-1.51751	0.00312683	0.268362	0.258949	2382	tags=28%, list=19%, signal=23%	KNTC1/XPO1/SYCP3/NUP43/GPATCH11/DSN1/MAD2L1/CENPL/NDC80/CDT1/FBXO28/CENPV/ORC2/DYNC1LI1/KAT7/PLK1/CSNK1A1/BUB3/ANAPC16/PSEN2/ERCC6L/NUDCD2/SPC24/NUP37/ESCO2/NCAPD2/STAG1/SMC5/SYCP1/HELLS/KIF2C/CENPK/CENPQ/CENPI/CENPT/NUF2/SKA3/ZWILCH/AURKB/NCAPD3/NEK2/IKZF1/CENPN/MIS18A/CCNB1/CENPP
BP	GO:0050863	regulation of T cell activation	205	-0.586777	-1.57862	0.00346787	0.293718	0.283415	1144	tags=22%, list=9%, signal=21%	TMIGD2/CSK/TESPA1/SIRPA/DUSP3/LOXL3/EBI3/CD55/FANCD2/SMAD7/ADAM8/CRTAM/HLA-A/XBP1/NRARP/TFRC/RAC2/HAVCR2/CD2/HLA-G/HLA-DPA1/MYB/RHOH/VAV1/SLC46A2/TIGIT/CD6/CD276/ZAP70/PTPRC/RUNX3/IRF1/ADA/SYK/TNFSF13B/LRRC32/SASH3/HLA-DPB1/NCKAP1L/AIF1/CD3E/TWSG1/CCR7/CD274/RUNX1/TNFRSF1B
BP	GO:0002690	positive regulation of leukocyte chemotaxis	62	-0.74704	-1.74026	0.0035224	0.293718	0.283415	1260	tags=31%, list=10%, signal=28%	PRSS56/CXCL8/MOSPD2/THBS1/CMKLR1/TIRAP/RAC2/WNT5A/CCR1/C5AR1/SWAP70/CXCL10/LGMN/CSF1/NCKAP1L/AIF1/CCR7/CCL3/CSF1R
BP	GO:0051251	positive regulation of lymphocyte activation	187	-0.61377	-1.63426	0.00354165	0.293718	0.283415	1478	tags=25%, list=12%, signal=22%	CD38/IGLL1/MIF/PRKCQ/GPR183/LAMP1/BCL6/CD27/TMIGD2/CSK/TESPA1/SIRPA/MLH1/BLOC1S3/FCRL3/EBI3/CD55/ADAM8/HLA-A/XBP1/TIRAP/TFRC/HAVCR2/HLA-G/HLA-DPA1/MYB/RHOH/VAV1/CD6/CD276/ZAP70/PTPRC/RUNX3/ADA/SYK/TLR9/TNFSF13B/SASH3/INPP5D/HLA-DPB1/NCKAP1L/AIF1/CD3E/CCR7/CD274/RUNX1
MF	GO:0004896	cytokine receptor activity	63	-0.744708	-1.74422	0.00375674	0.302427	0.29182	591	tags=29%, list=5%, signal=27%	CCR4/IL2RG/IL9R/EBI3/GHR/CMKLR1/XCR1/IL1RL1/CCR1/IL2RB/CSF3R/IFNAR1/IL5RA/EPOR/CXCR3/CCR7/CSF2RB/CNTFR
BP	GO:0050850	positive regulation of calcium-mediated signaling	23	-0.846987	-1.69498	0.00379759	0.302427	0.29182	940	tags=39%, list=7%, signal=36%	SLC9A1/CDH13/ZAP70/NEUROD2/ADA/SYK/CHP2/CD3E/CCL3
BP	GO:0022618	ribonucleoprotein complex assembly	169	0.6573	1.72455	0.00381866	0.302427	0.29182	1435	tags=21%, list=11%, signal=19%	EIF3H/RPLP0/YTHDC1/EIF3C/RPS19/RPL13A/ADAR/RPL11/PIH1D2/EIF3B/RPS14/RPSA/RPS15/EIF3A/BRIX1/AGO4/RPL10/HSP90AB1/RPL3/RPL23A/DICER1/EIF2S3/RPL6/PPAN/RPS5/MDN1/RPL24/RPS28/RPS10/MRTO4/DDX28/DDX1/DHX9/EIF3M/TRAF7/CELF2
BP	GO:0031055	chromatin remodeling at centromere	23	-0.84658	-1.69417	0.00386992	0.302427	0.29182	1038	tags=35%, list=8%, signal=32%	HELLS/CENPK/CENPQ/CENPI/CENPT/CENPN/MIS18A/CENPP
BP	GO:0035235	ionotropic glutamate receptor signaling pathway	23	-0.846407	-1.69382	0.00386992	0.302427	0.29182	954	tags=30%, list=8%, signal=28%	GRIK4/GRID2/GRIN1/GRIK2/GRIA2/CDK5R1/GRIN2C
BP	GO:0000027	ribosomal large subunit assembly	23	0.836295	1.66971	0.00389251	0.302427	0.29182	1685	tags=61%, list=13%, signal=53%	RPLP0/RPL11/BRIX1/RPL10/RPL3/RPL23A/RPL6/PPAN/MDN1/RPL24/MRTO4/DDX28/TRAF7/RPL5
BP	GO:0007159	leukocyte cell-cell adhesion	232	-0.579865	-1.58139	0.00416314	0.320085	0.308858	1437	tags=25%, list=11%, signal=23%	MSN/FUT7/CLEC4M/PRKCQ/PPARA/BCL6/CD27/ICAM1/TMIGD2/CSK/TESPA1/SIRPA/DUSP3/LOXL3/EBI3/CD55/SMAD7/ADAM8/FUT9/CRTAM/HLA-A/XBP1/NRARP/TFRC/RAC2/HAVCR2/SELP/HLA-G/HLA-DPA1/MYB/ADTRP/RHOH/VAV1/SELPLG/SKAP1/TIGIT/CD6/CD276/ZAP70/PTPRC/ADD2/RUNX3/IRF1/ADA/SYK/ITGB2/TNFSF13B/LRRC32/SASH3/ASS1/HLA-DPB1/NCKAP1L/AIF1/CD3E/TWSG1/CCR7/CD274/RUNX1/APOA4
BP	GO:0036037	CD8-positive, alpha-beta T cell activation	16	-0.863274	-1.62256	0.00426761	0.322977	0.311648	845	tags=44%, list=7%, signal=41%	CRTAM/HLA-A/RUNX3/IRF1/NCKAP1L/CD274/RUNX1
BP	GO:0002444	myeloid leukocyte mediated immunity	418	-0.509433	-1.4617	0.00434007	0.322977	0.311648	2066	tags=26%, list=16%, signal=22%	CTSA/DNAJC5/RHOA/S100P/ORM1/CD59/LAMTOR2/GNS/SERPINB6/RHOG/CTSB/S100A13/RAP1B/C3/CBL/DYNC1LI1/SYNGR1/FRK/VAT1/ARSA/QSOX1/BIN2/ITGAL/LRG1/DNASE1/RAB7A/MVP/NPC2/CLEC4C/DOK3/PGLYRP1/SLC27A2/CYFIP1/DOCK2/ATG7/CEACAM6/NEU1/CYB5R3/MIF/ARSB/PRSS3/ACTR2/LAMP1/TUSC2/PIGR/MOSPD2/GAA/STBD1/GSN/SIRPA/HEXB/BRI3/GRN/JAGN1/CD53/KCNAB2/CD55/CD93/RAB10/GMFG/B4GALT1/ADAM8/CTSD/GATA2/LAMP2/CD63/PTPRB/CYBA/GLIPR1/RA…
MF	GO:0140375	immune receptor activity	72	-0.743324	-1.76624	0.00443187	0.322977	0.311648	1124	tags=31%, list=9%, signal=28%	CCR4/MR1/IL2RG/IL9R/CD200R1/EBI3/GHR/CMKLR1/XCR1/IL1RL1/HLA-DPA1/CCR1/C5AR1/IL2RB/CSF3R/IFNAR1/IL5RA/EPOR/CXCR3/CCR7/CSF2RB/CNTFR
BP	GO:0050873	brown fat cell differentiation	39	0.781186	1.72262	0.00446162	0.322977	0.311648	220	tags=10%, list=2%, signal=10%	INS/ZNF516/RGS2/PLAC8
BP	GO:1903037	regulation of leukocyte cell-cell adhesion	206	-0.580115	-1.56212	0.0044779	0.322977	0.311648	1358	tags=26%, list=11%, signal=23%	FUT7/PRKCQ/PPARA/BCL6/CD27/ICAM1/TMIGD2/CSK/TESPA1/SIRPA/DUSP3/LOXL3/EBI3/CD55/SMAD7/ADAM8/FUT9/CRTAM/HLA-A/XBP1/NRARP/TFRC/HAVCR2/SELP/HLA-G/HLA-DPA1/MYB/ADTRP/RHOH/VAV1/SKAP1/TIGIT/CD6/CD276/ZAP70/PTPRC/RUNX3/IRF1/ADA/SYK/ITGB2/TNFSF13B/LRRC32/SASH3/ASS1/HLA-DPB1/NCKAP1L/AIF1/CD3E/TWSG1/CCR7/CD274/RUNX1
CC	GO:0070821	tertiary granule membrane	54	-0.772572	-1.76229	0.00448007	0.322977	0.311648	1157	tags=28%, list=9%, signal=25%	GAA/STBD1/SIRPA/CD53/KCNAB2/CD93/ADAM8/PTPRB/CYBA/RAP2C/SNAP25/SIGLEC5/PLAU/ITGB2/CLEC4D
BP	GO:0030851	granulocyte differentiation	22	-0.834563	-1.66226	0.00454883	0.322977	0.311648	997	tags=45%, list=8%, signal=42%	JAGN1/TAL1/CEBPA/GATA2/FASN/ZBTB46/INPP5D/C1QC/SPI1/RUNX1
MF	GO:0005159	insulin-like growth factor receptor binding	14	0.907032	1.69724	0.00462003	0.322977	0.311648	95	tags=14%, list=1%, signal=14%	INS/SOCS2
BP	GO:0050657	nucleic acid transport	162	0.612635	1.59436	0.00466036	0.322977	0.311648	2026	tags=20%, list=16%, signal=17%	IGF2BP1/IGF2BP2/NUP210/YTHDC1/SMG7/SEH1L/RPS15/NUP205/LRPPRC/IGF2BP3/QKI/UPF1/SMG1/DHX9/KHDRBS1/DDX19B/SUPT6H/RBM15B/HSF1/THOC2/TOMM20/MCM3AP/NUP214/RANBP2/SETD2/ZC3H3/NUP153/RFTN2/FYTTD1/ZFP36L1/EIF6/FIP1L1
BP	GO:0050658	RNA transport	162	0.612635	1.59436	0.00466036	0.322977	0.311648	2026	tags=20%, list=16%, signal=17%	IGF2BP1/IGF2BP2/NUP210/YTHDC1/SMG7/SEH1L/RPS15/NUP205/LRPPRC/IGF2BP3/QKI/UPF1/SMG1/DHX9/KHDRBS1/DDX19B/SUPT6H/RBM15B/HSF1/THOC2/TOMM20/MCM3AP/NUP214/RANBP2/SETD2/ZC3H3/NUP153/RFTN2/FYTTD1/ZFP36L1/EIF6/FIP1L1
CC	GO:0010494	cytoplasmic stress granule	55	0.767905	1.75257	0.00471284	0.322977	0.311648	1471	tags=27%, list=12%, signal=24%	PABPC4/IGF2BP1/UBAP2L/CSDE1/RPTOR/EIF2S1/PABPC1/MOV10/CAPRIN1/DDX1/GIGYF2/PRRC2C/PUM1/DDX19B/EIF4G1
BP	GO:0043299	leukocyte degranulation	404	-0.513327	-1.46661	0.00472585	0.322977	0.311648	2066	tags=26%, list=16%, signal=22%	CTSA/DNAJC5/RHOA/S100P/ORM1/CD59/LAMTOR2/GNS/SERPINB6/RHOG/CTSB/S100A13/RAP1B/C3/CBL/DYNC1LI1/SYNGR1/FRK/VAT1/ARSA/QSOX1/BIN2/ITGAL/LRG1/RAB7A/MVP/NPC2/CLEC4C/DOK3/PGLYRP1/SLC27A2/CYFIP1/DOCK2/ATG7/CEACAM6/NEU1/CYB5R3/MIF/ARSB/PRSS3/ACTR2/LAMP1/PIGR/MOSPD2/GAA/STBD1/GSN/SIRPA/HEXB/BRI3/GRN/CD53/KCNAB2/CD55/CD93/RAB10/GMFG/B4GALT1/ADAM8/CTSD/GATA2/LAMP2/CD63/PTPRB/CYBA/GLIPR1/RAC2/PLAUR/PRDX4/BLK/…
MF	GO:0019956	chemokine binding	22	-0.83212	-1.65739	0.00505026	0.341981	0.329986	1124	tags=41%, list=9%, signal=37%	CXCR4/CCR4/PDPN/XCR1/CCR1/A2M/CXCR3/ITGB3/CCR7
CC	GO:0009897	external side of plasma membrane	183	-0.602113	-1.59865	0.00513057	0.344261	0.332186	1344	tags=25%, list=11%, signal=23%	P2RY12/LAMP1/RTN4R/CD27/ICAM1/ENOX1/NCAM1/CCR4/THBS1/MR1/IL2RG/SLC7A5/CD200R1/EBI3/GHR/B4GALT1/CDH13/SEMA7A/TFRC/B2M/SELP/XCR1/IL1RL1/CD2/HLA-G/CCR1/GP1BA/IL2RB/GRIA2/CD6/CXCL10/CD276/SPA17/PTPRC/CSF3R/IL5RA/ADA/ITGB2/FASLG/CXCR3/IGSF21/CD3E/CCR7/CD274/CD3D/CNTFR
MF	GO:0048027	mRNA 5'-UTR binding	22	0.847434	1.66114	0.00523075	0.34707	0.334896	914	tags=36%, list=7%, signal=34%	IGF2BP1/IGF2BP2/RPS13/RPS14/RPS7/RPL26/IGF2BP3/RPS3A
BP	GO:0022409	positive regulation of cell-cell adhesion	183	-0.600882	-1.59538	0.00526647	0.34707	0.334896	1474	tags=26%, list=12%, signal=23%	FGG/CEACAM6/FUT7/PRKCQ/BCL6/CD27/ICAM1/TMIGD2/CSK/TESPA1/SIRPA/EBI3/CD55/SMAD7/ADAM8/HLA-A/XBP1/DMTN/PDPN/TFRC/HAVCR2/PLAUR/WNT5A/SELP/HLA-G/HLA-DPA1/MYB/RHOH/VAV1/SKAP1/CD6/CD276/ZAP70/PTPRC/RUNX3/ADA/SYK/ITGB2/TNFSF13B/SASH3/HLA-DPB1/NCKAP1L/AIF1/CD3E/CCR7/CD274/RUNX1
BP	GO:0042743	hydrogen peroxide metabolic process	34	-0.761474	-1.58815	0.00533743	0.348633	0.336405	883	tags=32%, list=7%, signal=30%	SNCA/CYBA/RAC2/PRDX4/PRDX5/CYP1A1/HBZ/PRDX6/TPO/HBE1/APOA4
BP	GO:0097529	myeloid leukocyte migration	144	-0.606495	-1.57471	0.00547798	0.354675	0.342235	1426	tags=30%, list=11%, signal=27%	MIF/FUT7/P2RY12/PIP5K1C/CXCL8/MOSPD2/MST1/CXCL2/THBS1/SIRPA/CD200R1/JAGN1/CMKLR1/ADAM8/CKLF/SLAMF8/TIRAP/UMODL1/CD200/RAC2/PLA2G1B/PIK3CD/PTPRO/CCR1/C5AR1/RHOH/VAV1/SWAP70/CXCL10/SAA1/CSF3R/PREX1/SYK/ITGB2/CALCA/LGMN/CSF1/PTGER4/NCKAP1L/AIF1/CCR7/CCL3/CSF1R
MF	GO:0004298	threonine-type endopeptidase activity	11	-0.908599	-1.63397	0.00557632	0.354829	0.342383	822	tags=36%, list=6%, signal=34%	PSMB6/PSMB9/PSMB7/PSMB8
BP	GO:0002181	cytoplasmic translation	88	0.718134	1.73589	0.00562509	0.354829	0.342383	1471	tags=45%, list=12%, signal=40%	EIF3H/RPLP0/EIF3C/RPS21/RPS23/RPL13A/RPS26/RPL11/RPL31/EIF3B/RPL10A/RPL15/RPL30/RPSA/RPL8/RBM24/EIF3A/RPL39/RPL29/RPL9/RPL26/EIF2S3/RPL18A/RPL6/RPLP1/RPL24/RPL36A/RPS28/RPL22/RPL36/CPEB4/RPS29/EIF4A1/RPL18/RPLP2/DHX9/EIF3M/RPL35A/RPL32/EIF4G1
BP	GO:0006336	DNA replication-independent nucleosome assembly	28	-0.834074	-1.71069	0.00574046	0.354829	0.342383	1203	tags=32%, list=9%, signal=29%	UBN1/ASF1A/CENPK/CENPQ/CENPI/CENPT/CENPN/MIS18A/CENPP
CC	GO:0001891	phagocytic cup	19	-0.844216	-1.64974	0.00579586	0.354829	0.342383	577	tags=32%, list=5%, signal=30%	PIP5K1C/SNX5/SH3BP1/LCP1/AIF1/ARHGAP25
BP	GO:0051569	regulation of histone H3-K4 methylation	26	0.817277	1.71391	0.00586091	0.354829	0.342383	957	tags=19%, list=8%, signal=18%	GCG/KMT2A/GFI1/KMT2E/PRDM9
BP	GO:0016486	peptide hormone processing	24	0.902583	1.84349	0.00589196	0.354829	0.342383	47	tags=12%, list=0%, signal=12%	PCSK2/PCSK1/SCG5
BP	GO:0046651	lymphocyte proliferation	168	-0.577624	-1.52197	0.00592696	0.354829	0.342383	1548	tags=26%, list=12%, signal=23%	IL6ST/DOCK2/CD38/MSN/MIF/PRKCQ/GPR183/BCL6/TMIGD2/FKBP1B/HELLS/FCRL3/EBI3/CD55/TBK1/CRTAM/HLA-A/TIRAP/TFRC/RAC2/HAVCR2/BLK/HLA-G/RASGRP1/HLA-DPA1/CD6/CD276/ZAP70/PTPRC/IRF1/ADA/SYK/TLR9/TNFSF13B/LRRC32/SASH3/INPP5D/HLA-DPB1/NCKAP1L/AIF1/CD3E/TWSG1/CD274/TNFRSF1B
BP	GO:0046634	regulation of alpha-beta T cell activation	56	-0.798463	-1.83085	0.00594022	0.354829	0.342383	1001	tags=34%, list=8%, signal=31%	LOXL3/EBI3/CD55/SMAD7/CRTAM/HLA-A/MYB/ZAP70/PTPRC/RUNX3/IRF1/ADA/SYK/SASH3/NCKAP1L/CD3E/TWSG1/CD274/RUNX1
MF	GO:0004970	ionotropic glutamate receptor activity	17	-0.864192	-1.65591	0.00598882	0.354829	0.342383	954	tags=35%, list=8%, signal=33%	GRIK4/GRID2/GRIN1/GRIK2/GRIA2/GRIN2C
BP	GO:0043471	regulation of cellular carbohydrate catabolic process	11	0.921556	1.64268	0.00605533	0.354829	0.342383	5	tags=9%, list=0%, signal=9%	INS
BP	GO:0090336	positive regulation of brown fat cell differentiation	15	0.918286	1.73558	0.00613534	0.354829	0.342383	5	tags=7%, list=0%, signal=7%	INS
BP	GO:0042119	neutrophil activation	378	-0.504807	-1.43642	0.0063316	0.354829	0.342383	2066	tags=26%, list=16%, signal=23%	CTSA/DNAJC5/RHOA/IL18RAP/S100P/ORM1/CD59/LAMTOR2/GNS/SERPINB6/RHOG/CTSB/RAP1B/C3/DYNC1LI1/SYNGR1/FRK/VAT1/ARSA/QSOX1/BIN2/ITGAL/LRG1/DNASE1/RAB7A/MVP/NPC2/CLEC4C/DOK3/PGLYRP1/SLC27A2/CYFIP1/DOCK2/ATG7/CEACAM6/NEU1/CYB5R3/MIF/ARSB/PRSS3/ACTR2/LAMP1/PIGR/CXCL8/MOSPD2/GAA/STBD1/GSN/SIRPA/HEXB/BRI3/GRN/CD53/KCNAB2/CD55/CD93/RAB10/GMFG/B4GALT1/ADAM8/CTSD/LAMP2/CD63/PTPRB/CYBA/GLIPR1/PLAUR/PRDX4/B2M/OL…
BP	GO:0034660	ncRNA metabolic process	400	0.539064	1.5027	0.00637211	0.354829	0.342383	2005	tags=20%, list=16%, signal=17%	HENMT1/MOV10L1/RPS21/RPS19/RPS9/RPS16/SIRT7/ASZ1/ADAR/RPL11/RPS2/RPL14/PIH1D2/RPS8/RPL7A/RPS14/RPL10A/RPS6/RPS25/RPS15/NSA2/RPUSD2/RPL35/AGO4/THADA/RPS7/GTPBP4/RPL26/YBEY/DICER1/RPS17/UTP20/SARS2/HEATR1/MDN1/DUS4L/MTO1/WDR74/INTS5/HELQ/RPS28/DDX10/SND1/RCL1/MRTO4/RPL7/DDX21/PDCD11/CHD7/DDX1/DTD2/MRM1/RPS24/RPL27/DIS3L/DTD1/TUT1/RPL35A/WDR36/TDRD9/FARSB/KRR1/PIWIL1/MAPT/EXD1/RPL5/USB1/NFKB1/INTS6/…
BP	GO:0009251	glucan catabolic process	21	0.857018	1.66902	0.00639974	0.354829	0.342383	476	tags=10%, list=4%, signal=9%	INS/PHKA2
BP	GO:0044247	cellular polysaccharide catabolic process	21	0.857018	1.66902	0.00639974	0.354829	0.342383	476	tags=10%, list=4%, signal=9%	INS/PHKA2
BP	GO:0016072	rRNA metabolic process	203	0.641391	1.71449	0.00640676	0.354829	0.342383	1433	tags=22%, list=11%, signal=20%	RPS21/RPS19/RPS9/RPS16/SIRT7/RPL11/RPS2/RPL14/PIH1D2/RPS8/RPL7A/RPS14/RPL10A/RPS6/RPS25/RPS15/NSA2/RPUSD2/RPL35/RPS7/GTPBP4/RPL26/YBEY/RPS17/UTP20/HEATR1/MDN1/WDR74/HELQ/RPS28/DDX10/RCL1/MRTO4/RPL7/DDX21/PDCD11/CHD7/MRM1/RPS24/RPL27/DIS3L/RPL35A/WDR36/KRR1
BP	GO:0006873	cellular ion homeostasis	483	-0.47846	-1.3897	0.00649568	0.354829	0.342383	1794	tags=23%, list=14%, signal=21%	KNG1/NDFIP1/EDN1/TMTC4/CASQ1/EPO/DHRS7C/MCOLN3/SLC46A1/RAB7A/ATOX1/CLN5/CASQ2/CYBRD1/CAV2/SLC8A1/COX19/C7/TMPRSS6/VPS33A/ATP6AP1/CNGB1/CXCR4/CD38/SLC24A2/CTRC/CIB2/SLC1A1/ATP6V1H/STIM1/ANK2/SNAPIN/CALB2/JPH3/ADCY8/TMBIM6/JPH1/SLC8A2/TMEM9/CCR4/CCDC115/FLVCR1/BCAP31/FKBP1B/HEXB/ATP1A1/GRN/CD55/MICU1/SLC9A1/CMKLR1/MICU2/CP/F2RL2/SLC9A7/SNCA/P2RY1/GPR174/GATA2/CCDC22/SLAMF8/RHCG/PTGIR/DRD2/TFRC/SLC9…
BP	GO:0043312	neutrophil degranulation	370	-0.502335	-1.43285	0.00649745	0.354829	0.342383	2066	tags=26%, list=16%, signal=22%	CTSA/DNAJC5/RHOA/S100P/ORM1/CD59/LAMTOR2/GNS/SERPINB6/RHOG/CTSB/RAP1B/C3/DYNC1LI1/SYNGR1/FRK/VAT1/ARSA/QSOX1/BIN2/ITGAL/LRG1/RAB7A/MVP/NPC2/CLEC4C/DOK3/PGLYRP1/SLC27A2/CYFIP1/DOCK2/ATG7/CEACAM6/NEU1/CYB5R3/MIF/ARSB/PRSS3/ACTR2/LAMP1/PIGR/MOSPD2/GAA/STBD1/GSN/SIRPA/HEXB/BRI3/GRN/CD53/KCNAB2/CD55/CD93/RAB10/GMFG/B4GALT1/ADAM8/CTSD/LAMP2/CD63/PTPRB/CYBA/GLIPR1/PLAUR/PRDX4/B2M/OLFM4/PRCP/CTSC/RAP2C/G…
BP	GO:0099024	plasma membrane invagination	54	-0.745568	-1.70069	0.00653756	0.354829	0.342383	1126	tags=28%, list=9%, signal=25%	GSN/THBS1/ELMO1/GATA2/RAC2/AURKB/RHOH/FCGR1A/XKR5/ITGB2/SH3BP1/MARCO/NCKAP1L/AIF1/ARHGAP25
BP	GO:0050870	positive regulation of T cell activation	131	-0.655453	-1.68504	0.00658034	0.354829	0.342383	1278	tags=27%, list=10%, signal=24%	PRKCQ/BCL6/CD27/TMIGD2/CSK/TESPA1/SIRPA/EBI3/CD55/ADAM8/HLA-A/XBP1/TFRC/HAVCR2/HLA-G/HLA-DPA1/MYB/RHOH/VAV1/CD6/CD276/ZAP70/PTPRC/RUNX3/ADA/SYK/TNFSF13B/SASH3/HLA-DPB1/NCKAP1L/AIF1/CD3E/CCR7/CD274/RUNX1
BP	GO:0060538	skeletal muscle organ development	123	-0.622642	-1.58099	0.00662282	0.354829	0.342383	241	tags=6%, list=2%, signal=6%	KEL/PAX5/HDAC9/EEF2/ASS1/DNER/CNTFR
CC	GO:0098687	chromosomal region	274	-0.526983	-1.46455	0.00663463	0.354829	0.342383	2056	tags=21%, list=16%, signal=18%	MAD2L1/CENPL/NDC80/CDT1/CDK1/PCNA/FBXO28/CENPV/ORC2/MCM6/MCM5/DYNC1LI1/POLD1/KAT7/SIRT2/RAD51/PLK1/MCM3/BRCA2/CSNK1A1/TERF1/BUB3/ANAPC16/MCM2/PSEN2/ERCC6L/NUDCD2/SPC24/NUP37/ESCO2/MCM4/THOC7/NCAPD2/STAG1/SMC5/SYCP1/HELLS/KIF2C/DMC1/CENPK/CENPQ/CENPI/CENPT/NUF2/SKA3/ZWILCH/TERT/AURKB/WRNIP1/NCAPD3/ORC1/NEK2/IKZF1/RAD51AP1/CENPN/MIS18A/CCNB1/CENPP
BP	GO:0036230	granulocyte activation	382	-0.512607	-1.46209	0.00668022	0.354829	0.342383	2066	tags=26%, list=16%, signal=23%	CTSA/DNAJC5/RHOA/IL18RAP/S100P/ORM1/CD59/LAMTOR2/GNS/SERPINB6/RHOG/CTSB/RAP1B/C3/DYNC1LI1/SYNGR1/FRK/VAT1/ARSA/QSOX1/BIN2/ITGAL/LRG1/DNASE1/RAB7A/MVP/NPC2/CLEC4C/DOK3/PGLYRP1/SLC27A2/CYFIP1/DOCK2/ATG7/CEACAM6/NEU1/CYB5R3/MIF/ARSB/PRSS3/ACTR2/LAMP1/PIGR/CXCL8/MOSPD2/GAA/STBD1/GSN/SIRPA/HEXB/BRI3/GRN/CD53/KCNAB2/CD55/CD93/RAB10/GMFG/B4GALT1/ADAM8/CTSD/LAMP2/CD63/PTPRB/CYBA/GLIPR1/PLAUR/PRDX4/B2M/OL…
BP	GO:0051482	positive regulation of cytosolic calcium ion concentration involved in phospholipase C-activating G protein-coupled signaling pathway	25	-0.806536	-1.61413	0.00670336	0.354829	0.342383	885	tags=24%, list=7%, signal=22%	F2RL2/GPR174/DRD2/P2RY8/CALCA/GPR18
BP	GO:0002920	regulation of humoral immune response	49	-0.727126	-1.64342	0.00673667	0.354829	0.342383	1996	tags=47%, list=16%, signal=40%	CD59/CFH/C3/C4B/C8A/C7/VTN/LTA/CFB/CD55/CPB2/C4BPA/IL17F/C5AR1/CFI/CLU/PTPRC/A2M/SERPING1/C1QA/CFP/C1QC/CCR7
BP	GO:0002685	regulation of leukocyte migration	140	-0.633591	-1.64237	0.00677308	0.354829	0.342383	1461	tags=27%, list=11%, signal=24%	ECM1/MSN/MIF/FUT7/P2RY12/PRSS56/CXCL8/ICAM1/MOSPD2/MST1/THBS1/CD200R1/CMKLR1/ADAM8/PLVAP/FUT9/SLAMF8/TIRAP/CD200/RAC2/WNT5A/SELP/CCR1/ADTRP/C5AR1/RHOH/SWAP70/CXCL10/ADA/LGMN/CSF1/CXCR3/PTGER4/NCKAP1L/AIF1/CCR7/CCL3/CSF1R
BP	GO:0070665	positive regulation of leukocyte proliferation	88	-0.700325	-1.709	0.00682225	0.354829	0.342383	1548	tags=36%, list=12%, signal=32%	IL6ST/CD38/MIF/PRKCQ/GPR183/BCL6/TMIGD2/FCRL3/EBI3/CD55/HLA-A/TIRAP/TFRC/HAVCR2/HLA-DPA1/CD6/CD276/ZAP70/PTPRC/IL5RA/ADA/SYK/TLR9/TNFSF13B/SASH3/CSF1/HLA-DPB1/NCKAP1L/AIF1/CD3E/CD274/CSF1R
BP	GO:0042044	fluid transport	22	0.840745	1.64803	0.00683432	0.354829	0.342383	403	tags=18%, list=3%, signal=18%	SLC14A1/CFTR/AQP8/SLC26A6
MF	GO:0042626	ATPase-coupled transmembrane transporter activity	40	0.833162	1.83375	0.00692431	0.354829	0.342383	637	tags=15%, list=5%, signal=14%	ABCC12/CFTR/ABCA4/ABCG4/ABCD2/ABCC4
BP	GO:0031018	endocrine pancreas development	38	0.763212	1.68331	0.00698267	0.354829	0.342383	763	tags=21%, list=6%, signal=20%	NKX6-2/PAX6/PDX1/RFX6/NEUROD1/EIF2AK3/ONECUT1/INSM1
BP	GO:0071675	regulation of mononuclear cell migration	75	-0.643211	-1.54022	0.00703394	0.354829	0.342383	1192	tags=27%, list=9%, signal=24%	ECM1/MSN/MOSPD2/THBS1/CD200R1/CMKLR1/ADAM8/SLAMF8/CD200/WNT5A/CCR1/ADTRP/C5AR1/CXCL10/LGMN/CSF1/AIF1/CCR7/CCL3/CSF1R
BP	GO:0002283	neutrophil activation involved in immune response	372	-0.502648	-1.43312	0.00704989	0.354829	0.342383	2066	tags=26%, list=16%, signal=22%	CTSA/DNAJC5/RHOA/S100P/ORM1/CD59/LAMTOR2/GNS/SERPINB6/RHOG/CTSB/RAP1B/C3/DYNC1LI1/SYNGR1/FRK/VAT1/ARSA/QSOX1/BIN2/ITGAL/LRG1/DNASE1/RAB7A/MVP/NPC2/CLEC4C/DOK3/PGLYRP1/SLC27A2/CYFIP1/DOCK2/ATG7/CEACAM6/NEU1/CYB5R3/MIF/ARSB/PRSS3/ACTR2/LAMP1/PIGR/MOSPD2/GAA/STBD1/GSN/SIRPA/HEXB/BRI3/GRN/CD53/KCNAB2/CD55/CD93/RAB10/GMFG/B4GALT1/ADAM8/CTSD/LAMP2/CD63/PTPRB/CYBA/GLIPR1/PLAUR/PRDX4/B2M/OLFM4/PRCP/CTSC/…
BP	GO:0032944	regulation of mononuclear cell proliferation	139	-0.614378	-1.58762	0.00706678	0.354829	0.342383	1016	tags=24%, list=8%, signal=22%	FCRL3/EBI3/CD55/CRTAM/HLA-A/TIRAP/TFRC/RAC2/HAVCR2/BLK/HLA-G/HLA-DPA1/CRP/CD6/CD276/ZAP70/PTPRC/IRF1/ADA/SYK/TLR9/TNFSF13B/LRRC32/SASH3/INPP5D/CSF1/HLA-DPB1/NCKAP1L/AIF1/CD3E/TWSG1/CD274/TNFRSF1B
BP	GO:0010800	positive regulation of peptidyl-threonine phosphorylation	22	0.839692	1.64596	0.00713976	0.356071	0.343582	4	tags=5%, list=0%, signal=5%	GCG
BP	GO:0050900	leukocyte migration	314	-0.528387	-1.47791	0.00724778	0.359033	0.346439	1481	tags=23%, list=12%, signal=21%	CXCR4/ECM1/CEACAM6/MSN/IGLL1/MIF/FUT7/P2RY12/GPR183/PIP5K1C/PRSS56/CXCL8/ICAM1/MOSPD2/MST1/CXCL2/THBS1/SIRPA/SLC7A5/CD200R1/JAGN1/CMKLR1/B4GALT1/ADAM8/PLVAP/FUT9/CKLF/CRTAM/SLAMF8/TIRAP/CNR2/MAG/UMODL1/CD200/CD48/RAC2/WNT5A/PLA2G1B/SELP/PIK3CD/CD2/PTPRO/CCR1/ADTRP/C5AR1/RHOH/VAV1/SWAP70/SELPLG/CXCL10/ZAP70/SAA1/SLC7A9/ADD2/CSF3R/PREX1/ADA/SYK/ITGB2/CALCA/CD84/LGMN/INPP5D/CSF1/CXCR3/PTGER4/NCKAP1L…
BP	GO:0098869	cellular oxidant detoxification	62	-0.703598	-1.63906	0.00748412	0.366291	0.353443	1456	tags=24%, list=11%, signal=22%	GPX1/MGST3/GPX5/CYGB/GPX4/FANCC/PRDX4/PRDX5/HBZ/TXN/PRDX6/TPO/HBE1/APOE/APOA4
BP	GO:0034470	ncRNA processing	337	0.545083	1.50597	0.00755552	0.366291	0.353443	1433	tags=15%, list=11%, signal=14%	RPS21/RPS19/RPS9/RPS16/SIRT7/ADAR/RPL11/RPS2/RPL14/PIH1D2/RPS8/RPL7A/RPS14/RPL10A/RPS6/RPS25/RPS15/NSA2/RPUSD2/RPL35/AGO4/THADA/RPS7/GTPBP4/RPL26/YBEY/DICER1/RPS17/UTP20/HEATR1/MDN1/DUS4L/MTO1/WDR74/INTS5/HELQ/RPS28/DDX10/RCL1/MRTO4/RPL7/DDX21/PDCD11/CHD7/DDX1/MRM1/RPS24/RPL27/TUT1/RPL35A/WDR36/KRR1
CC	GO:0098552	side of membrane	348	-0.526286	-1.48615	0.0075863	0.366291	0.353443	1344	tags=21%, list=11%, signal=19%	P2RY12/LAMP1/RTN4R/GNAI1/CD27/KRAS/GNAQ/ICAM1/ENOX1/NCAM1/CCR4/THBS1/MR1/BCAP31/IL2RG/SLC7A5/CD200R1/EBI3/KCNAB2/GHR/CDIP1/B4GALT1/CDH13/HLA-A/CNR2/SEMA7A/TFRC/MIEN1/BORCS5/BLK/B2M/SELP/XCR1/SNX5/IL1RL1/TRAF2/CD2/SYAP1/HLA-G/GNAZ/RGS1/ATP2B1/S100A6/HLA-DPA1/SNAP25/CCR1/GP1BA/BDH1/IL2RB/GRIA2/GNAT2/CD6/CXCL10/CD276/ZAP70/SPA17/PTPRC/SLC4A1/CSF3R/IL5RA/ADA/GNG3/SYK/ITGB2/FASLG/CXCR3/HLA-DPB1/IGSF21…
BP	GO:0071774	response to fibroblast growth factor	120	0.711277	1.78977	0.00764947	0.366291	0.353443	1063	tags=14%, list=8%, signal=13%	ELK1/KLB/FLRT3/NR4A1/FGFR2/SPRY4/GALNT3/RBFOX2/ANOS1/FGF5/IER2/SULF1/CPS1/KIF16B/CD44/FGF7/FGF18
BP	GO:0071356	cellular response to tumor necrosis factor	197	-0.556378	-1.48408	0.00777388	0.366291	0.353443	1881	tags=22%, list=15%, signal=19%	APOA1/ADAMTS7/SMPD3/PSMA8/EDN1/GBA/APOB/SPPL2A/CIB1/NFE2L2/CASP1/AKAP12/DAB2IP/TNFRSF11B/TAX1BP1/CD27/CXCL8/ICAM1/LTA/THBS1/ARHGEF2/CDIP1/CEBPA/PLVAP/PSMB6/TANK/CARD14/NPNT/RBCK1/TRAF2/HYAL3/PSMB9/PSMB7/SYK/CALCA/TNFSF13B/PSME2/ASS1/PSMB8/TNFSF12/CCL3/TNFRSF1B/HAMP
CC	GO:0042101	T cell receptor complex	12	-0.900494	-1.63082	0.00778656	0.366291	0.353443	392	tags=58%, list=3%, signal=57%	APBB1IP/SKAP1/CD6/ZAP70/SYK/CD3E/CD3D
BP	GO:0031529	ruffle organization	48	-0.714486	-1.60945	0.00780383	0.366291	0.353443	1596	tags=23%, list=13%, signal=20%	PFN2/EPS8L3/CYFIP1/P2RY12/ICAM1/PLEK/CORO1C/SH3BP1/AIF1/CCR7/CSF1R
BP	GO:1900078	positive regulation of cellular response to insulin stimulus	21	0.852936	1.66107	0.00783946	0.366291	0.353443	5	tags=5%, list=0%, signal=5%	INS
BP	GO:0046640	regulation of alpha-beta T cell proliferation	20	-0.827505	-1.63143	0.00786202	0.366291	0.353443	994	tags=50%, list=8%, signal=46%	EBI3/CD55/HLA-A/ZAP70/PTPRC/IRF1/SYK/CD3E/TWSG1/CD274
MF	GO:0099529	neurotransmitter receptor activity involved in regulation of postsynaptic membrane potential	39	-0.737438	-1.58485	0.00789056	0.366291	0.353443	954	tags=33%, list=8%, signal=31%	GABRA6/CHRNA1/GABRG2/GRIK4/GABRR2/GRID2/GABRB1/ADRB1/GRIK2/CHRNA9/GABRR1/GABRG3/GRIN2C
CC	GO:0005775	vacuolar lumen	137	-0.612205	-1.57699	0.00794624	0.36657	0.353712	2000	tags=34%, list=16%, signal=29%	GPC6/DCN/GNS/CTSB/PLBD2/C3/FRK/VAT1/ARSA/GBA/GALC/APOB/BGN/PPT2/NPC2/NEU1/CYB5R3/ARSB/ACTR2/SGSH/NAAA/GAA/HEXB/GRN/CSPG5/CTSD/MAN2B2/LAMP2/CTSC/PRELP/GYG1/RNASET2/AGA/CTSS/IDS/PSAP/GLB1/TCN2/PRDX6/ANXA2/EPDR1/FASLG/LGMN/NCAN/LYZ/CTSK/HSPG2
BP	GO:0006801	superoxide metabolic process	48	-0.710921	-1.60142	0.00807062	0.368977	0.356035	893	tags=27%, list=7%, signal=25%	SOD1/EDN1/NFE2L2/NCF1/NRROS/FANCC/CYBA/PON3/CRP/PREX1/SYK/ITGB2/APOA4
CC	GO:0030667	secretory granule membrane	219	-0.573079	-1.55636	0.00817472	0.368977	0.356035	2051	tags=28%, list=16%, signal=24%	DNAJC5/SLC17A9/RHOA/CD59/LAMTOR2/SERPINB6/RHOG/RAP1B/DYNC1LI1/SYNGR1/ITGAL/RAB7A/CAV2/TMX3/CLEC4C/DOK3/SLC27A2/CD38/CEACAM6/LAMP1/PIGR/MOSPD2/GAA/STBD1/SIRPA/BRI3/CD53/KCNAB2/CD55/CFAP65/CD93/RAB10/CADPS/B4GALT1/SNCA/ADAM8/MOXD1/LAMP2/CD63/PTPRB/CYBA/GLIPR1/PLAUR/SELP/PRCP/HYAL3/RAP2C/SNAP25/C5AR1/ADGRE5/SIGLEC5/PSAP/ADGRG3/PTPRC/RND2/PLAU/PTPRN2/ITGB2/NCKAP1L/ITGB3/TNFRSF1B/CLEC4D
BP	GO:0016024	CDP-diacylglycerol biosynthetic process	11	-0.886276	-1.59382	0.00824723	0.368977	0.356035	116	tags=27%, list=1%, signal=27%	AGPAT5/GPAT3/AGPAT4
BP	GO:0046341	CDP-diacylglycerol metabolic process	11	-0.886276	-1.59382	0.00824723	0.368977	0.356035	116	tags=27%, list=1%, signal=27%	AGPAT5/GPAT3/AGPAT4
CC	GO:0019898	extrinsic component of membrane	244	-0.536905	-1.47487	0.00824837	0.368977	0.356035	1332	tags=15%, list=10%, signal=13%	PACSIN2/GNAI1/SNAP91/KRAS/GNAQ/CDH18/NAAA/DOC2A/CCDC115/KCNAB2/SMAD7/NUMA1/CDH13/CNR2/SYN1/CDH4/PLAUR/BLK/WIPI1/PIK3CD/SNX5/SYAP1/GNAZ/RGS1/S100A6/TOR1A/SNAP25/NMT1/GNAT2/PIK3R3/PIK3R5/ZAP70/GNG3/SYK/SARM1/CNTFR
BP	GO:0046850	regulation of bone remodeling	41	-0.725456	-1.57405	0.00844917	0.373524	0.360422	1519	tags=37%, list=12%, signal=32%	ATP6AP1/CD38/TNFRSF11B/CSK/ADAM8/TFRC/SIGLEC15/TMEM119/SYK/CALCA/CA2/INPP5D/ITGB3/CSF1R/HAMP
BP	GO:0046649	lymphocyte activation	461	-0.493558	-1.42152	0.00851267	0.373524	0.360422	1480	tags=22%, list=12%, signal=20%	APBB1IP/CD38/MSN/IGLL1/MIF/FUT7/PRKCQ/GPR183/LAMP1/TUSC2/BCL6/INHBA/CD27/ICAM1/FZD7/PARP3/SKAP2/TYRO3/TMIGD2/CSK/UNG/TESPA1/GSN/MR1/SIRPA/FKBP1B/DUSP3/MLH1/HELLS/BLOC1S3/FCRL3/LOXL3/EBI3/CD55/MAFB/FANCD2/SAMSN1/SMAD7/ADAM8/TBK1/CRTAM/HLA-A/SLAMF8/XBP1/TIRAP/NRARP/TFRC/RAC2/HAVCR2/BLK/B2M/LYL1/PIK3CD/CD2/HLA-G/RASGRP1/SLAMF6/HLA-DPA1/MYB/MFNG/LY9/RHOH/VAV1/SWAP70/SLC46A2/IKZF1/TIGIT/CD6/CD276/ZAP7…
BP	GO:0030217	T cell differentiation	166	-0.542616	-1.42986	0.00857843	0.373524	0.360422	1337	tags=23%, list=11%, signal=21%	GPR183/BCL6/CD27/FZD7/TESPA1/MR1/LOXL3/MAFB/FANCD2/SMAD7/ADAM8/CRTAM/XBP1/NRARP/B2M/PIK3CD/CD2/HLA-G/SLAMF6/MYB/LY9/RHOH/VAV1/SLC46A2/ZAP70/PTPRC/RUNX3/IRF1/PREX1/ADA/SYK/SASH3/PTGER4/NCKAP1L/CD3E/ITK/CCR7/CD3D/RUNX1
BP	GO:0009143	nucleoside triphosphate catabolic process	13	-0.890683	-1.61639	0.00860581	0.373524	0.360422	213	tags=23%, list=2%, signal=23%	NUDT15/ADA/ENTPD3
BP	GO:2001185	regulation of CD8-positive, alpha-beta T cell activation	12	-0.895795	-1.62231	0.00864378	0.373524	0.360422	845	tags=58%, list=7%, signal=55%	CRTAM/HLA-A/RUNX3/IRF1/NCKAP1L/CD274/RUNX1
BP	GO:0005980	glycogen catabolic process	20	0.857147	1.65465	0.00865364	0.373524	0.360422	476	tags=10%, list=4%, signal=10%	INS/PHKA2
BP	GO:0044275	cellular carbohydrate catabolic process	37	0.768824	1.69219	0.00882496	0.378222	0.364955	476	tags=5%, list=4%, signal=5%	INS/PHKA2
BP	GO:0042744	hydrogen peroxide catabolic process	19	-0.831922	-1.62571	0.00886498	0.378222	0.364955	883	tags=42%, list=7%, signal=39%	SNCA/PRDX4/PRDX5/HBZ/PRDX6/TPO/HBE1/APOA4
BP	GO:0048598	embryonic morphogenesis	478	0.49426	1.40082	0.00896314	0.378669	0.365387	1352	tags=16%, list=11%, signal=15%	TBC1D32/FZD5/LRP2/DUSP4/PDX1/WNT7A/DYNC2H1/CACNA1C/FLRT3/SEMA4C/TGFBR1/HAND2/FREM2/TH/AMOT/RYR2/FGFR2/GREM2/STIL/TRIM28/GLI1/MMP9/LRP6/ACVR2A/MYH3/NEUROD1/MYADM/FOXI1/TGIF2/TBX2/ROR2/SLC44A4/STRA6/MEGF8/WNK1/RPS6/NCOA1/CREBBP/C2CD3/VANGL2/WNT11/ITGB5/SIX4/ITGA2/LAMB1/RPS7/IL10/CELSR1/SOBP/CDON/SULF1/ATOH1/COL8A1/MSX2/TGFB2/NOTCH1/PROX1/KIF16B/NR4A3/COL2A1/LAMA5/SOX2/DSCAML1/PRKAR1A/HIF1A/NOTCH2/C…
MF	GO:0022824	transmitter-gated ion channel activity	49	-0.709424	-1.60341	0.00913779	0.378669	0.365387	954	tags=31%, list=8%, signal=28%	HTR3C/GABRA6/CHRNA1/GABRG2/GRIK4/GABRR2/GRID2/GABRB1/GRIN1/GRIK2/CHRNA9/GRIA2/GABRR1/GABRG3/GRIN2C
MF	GO:0022835	transmitter-gated channel activity	49	-0.709424	-1.60341	0.00913779	0.378669	0.365387	954	tags=31%, list=8%, signal=28%	HTR3C/GABRA6/CHRNA1/GABRG2/GRIK4/GABRR2/GRID2/GABRB1/GRIN1/GRIK2/CHRNA9/GRIA2/GABRR1/GABRG3/GRIN2C
CC	GO:0070820	tertiary granule	124	-0.605563	-1.54189	0.00917256	0.378669	0.365387	1575	tags=26%, list=12%, signal=23%	CLEC4C/DOK3/PGLYRP1/CYFIP1/PRSS3/LAMP1/GAA/STBD1/SIRPA/CD53/KCNAB2/CD55/CD93/ADAM8/CTSD/LAMP2/PTPRB/CYBA/B2M/OLFM4/PRCP/RAP2C/SNAP25/CTSS/SIGLEC5/PLAU/PTPRN2/ITGB2/CFP/NCKAP1L/LYZ/CLEC4D
BP	GO:0002687	positive regulation of leukocyte migration	89	-0.702795	-1.71896	0.00918718	0.378669	0.365387	1344	tags=27%, list=11%, signal=24%	P2RY12/PRSS56/CXCL8/ICAM1/MOSPD2/THBS1/CMKLR1/ADAM8/PLVAP/TIRAP/RAC2/WNT5A/SELP/CCR1/C5AR1/SWAP70/CXCL10/LGMN/CSF1/NCKAP1L/AIF1/CCR7/CCL3/CSF1R
BP	GO:0030003	cellular cation homeostasis	472	-0.476287	-1.37297	0.00925388	0.378669	0.365387	1794	tags=23%, list=14%, signal=20%	KNG1/NDFIP1/EDN1/TMTC4/CASQ1/EPO/DHRS7C/MCOLN3/SLC46A1/RAB7A/ATOX1/CLN5/CASQ2/CYBRD1/CAV2/SLC8A1/COX19/C7/TMPRSS6/VPS33A/ATP6AP1/CNGB1/CXCR4/CD38/SLC24A2/CTRC/CIB2/SLC1A1/ATP6V1H/STIM1/ANK2/SNAPIN/CALB2/JPH3/ADCY8/TMBIM6/JPH1/SLC8A2/TMEM9/CCR4/CCDC115/FLVCR1/BCAP31/FKBP1B/HEXB/ATP1A1/GRN/CD55/MICU1/SLC9A1/CMKLR1/MICU2/CP/F2RL2/SLC9A7/SNCA/P2RY1/GPR174/GATA2/CCDC22/SLAMF8/PTGIR/DRD2/TFRC/WNT5A/CHP…
BP	GO:0006875	cellular metal ion homeostasis	409	-0.499168	-1.43006	0.00927256	0.378669	0.365387	1794	tags=23%, list=14%, signal=21%	KNG1/NDFIP1/EDN1/TMTC4/CASQ1/EPO/DHRS7C/MCOLN3/SLC46A1/ATOX1/CASQ2/CYBRD1/CAV2/SLC8A1/COX19/C7/TMPRSS6/ATP6AP1/CNGB1/CXCR4/CD38/SLC24A2/CTRC/CIB2/SLC1A1/STIM1/ANK2/CALB2/JPH3/ADCY8/TMBIM6/JPH1/SLC8A2/CCR4/CCDC115/FLVCR1/BCAP31/FKBP1B/HEXB/ATP1A1/CD55/MICU1/SLC9A1/CMKLR1/MICU2/CP/F2RL2/SNCA/P2RY1/GPR174/GATA2/CCDC22/PTGIR/DRD2/TFRC/WNT5A/PLA2G1B/ATP2C1/XCR1/GRIN1/GRIK2/P2RY6/ATP2B1/CCR1/CHRNA9/KEL…
BP	GO:0046633	alpha-beta T cell proliferation	22	-0.811635	-1.61659	0.00928655	0.378669	0.365387	994	tags=45%, list=8%, signal=42%	EBI3/CD55/HLA-A/ZAP70/PTPRC/IRF1/SYK/CD3E/TWSG1/CD274
BP	GO:0032103	positive regulation of response to external stimulus	343	-0.518402	-1.46228	0.00933718	0.378669	0.365387	1260	tags=17%, list=10%, signal=15%	PRSS56/CXCL8/KRAS/TLR3/LTA/MOSPD2/CCR4/THBS1/FKBP1B/GRN/CMKLR1/CPB2/SNCA/ADAM8/CEBPA/TBK1/CRTAM/PSMB6/CDH13/TIRAP/CYBA/RAC2/HAVCR2/WNT5A/SH2D1A/MED1/IL1RL1/HLA-G/CTSC/IL17F/RASGRP1/SLAMF6/CCR1/DSCAM/C5AR1/VAV1/SWAP70/TLR7/PSMB9/PSMB7/CXCL10/SYK/TLR9/PSME2/LGMN/CSF1/PSMB8/PTGER4/NCKAP1L/AIF1/CLEC10A/CCR7/CCL3/CSF1R/SH2D1B/CLNK/CLEC4D
MF	GO:0042171	lysophosphatidic acid acyltransferase activity	14	-0.873322	-1.59855	0.00943251	0.379216	0.365915	520	tags=29%, list=4%, signal=27%	AGPAT5/LPCAT2/GPAT3/AGPAT4
BP	GO:0030224	monocyte differentiation	28	-0.796884	-1.63442	0.00945343	0.379216	0.365915	741	tags=25%, list=6%, signal=24%	FASN/MED1/ZBTB46/INPP5D/CSF1/CSF1R/PIR
BP	GO:0030101	natural killer cell activation	42	-0.711594	-1.54959	0.00956639	0.379294	0.36599	1324	tags=29%, list=10%, signal=26%	LAMP1/TUSC2/TYRO3/BLOC1S3/HAVCR2/PIK3CD/CD2/RASGRP1/PTPRC/PGLYRP2/ITGB2/CLNK
BP	GO:0070663	regulation of leukocyte proliferation	151	-0.626845	-1.63672	0.00958954	0.379294	0.36599	1016	tags=23%, list=8%, signal=22%	FCRL3/EBI3/CD55/CRTAM/HLA-A/TIRAP/TFRC/RAC2/HAVCR2/BLK/HLA-G/HLA-DPA1/CRP/CD6/CD276/ZAP70/PTPRC/IRF1/IL5RA/ADA/SYK/TLR9/TNFSF13B/LRRC32/SASH3/INPP5D/CSF1/HLA-DPB1/NCKAP1L/AIF1/CD3E/TWSG1/CD274/CSF1R/TNFRSF1B
BP	GO:0046636	negative regulation of alpha-beta T cell activation	24	-0.811067	-1.6179	0.00967973	0.379294	0.36599	1278	tags=29%, list=10%, signal=26%	BCL6/LOXL3/SMAD7/RUNX3/TWSG1/CD274/RUNX1
BP	GO:0021846	cell proliferation in forebrain	25	0.818622	1.68376	0.00971232	0.379294	0.36599	759	tags=20%, list=6%, signal=19%	IGF2BP1/WNT7A/FGFR2/PCM1/POU3F3
BP	GO:0035774	positive regulation of insulin secretion involved in cellular response to glucose stimulus	25	0.81952	1.6856	0.00971232	0.379294	0.36599	179	tags=16%, list=1%, signal=16%	GCG/CFTR/PDX1/RFX6
BP	GO:0003205	cardiac chamber development	129	0.611017	1.55838	0.00980752	0.379523	0.366211	1360	tags=25%, list=11%, signal=22%	LRP2/ADAMTS1/TGFBR1/HAND2/DSP/ISL1/SLIT2/MYBPC3/RYR2/CRELD1/FGFR2/ADGRG6/TBX2/STRA6/TNNC1/WNT11/KCNK2/SEMA3C/TGFB2/NOTCH1/PDE2A/PROX1/HIF1A/NOTCH2/ZFPM1/CHD7/NPY2R/SLIT3/PLXND1/HAND1/MAML1/TRIP11
BP	GO:0050670	regulation of lymphocyte proliferation	137	-0.5997	-1.54478	0.00984786	0.379523	0.366211	1016	tags=23%, list=8%, signal=21%	FCRL3/EBI3/CD55/CRTAM/HLA-A/TIRAP/TFRC/RAC2/HAVCR2/BLK/HLA-G/HLA-DPA1/CD6/CD276/ZAP70/PTPRC/IRF1/ADA/SYK/TLR9/TNFSF13B/LRRC32/SASH3/INPP5D/HLA-DPB1/NCKAP1L/AIF1/CD3E/TWSG1/CD274/TNFRSF1B
CC	GO:0031301	integral component of organelle membrane	295	-0.523331	-1.45321	0.00992933	0.379523	0.366211	1816	tags=14%, list=14%, signal=12%	TRAM2/SYNGR1/QSOX1/SPPL2A/SFXN2/POMGNT1/SLC38A9/SLC27A2/DPM2/TAP2/SLC46A3/AUP1/DHCR7/LAMP1/STIM1/ACER2/SYNPR/BCAP31/MICU1/TEX261/LAMP2/HLA-A/HACD2/B2M/TECR/HLA-G/HLA-DPA1/GDAP1/MFNG/TMEM163/CLSTN1/SFXN5/PTPRS/SGMS2/SYPL1/PTPRN2/DGAT2/HLA-DPB1/MGARP/SLC17A7/SCD/TRABD2B
BP	GO:0046632	alpha-beta T cell differentiation	70	-0.697924	-1.64464	0.00992946	0.379523	0.366211	494	tags=26%, list=4%, signal=25%	FUT7/GPR183/BCL6/LOXL3/SMAD7/SLAMF6/MYB/LY9/ZAP70/RUNX3/IRF1/ADA/SYK/SASH3/PTGER4/NCKAP1L/ITK/RUNX1
BP	GO:1901991	negative regulation of mitotic cell cycle phase transition	197	-0.546927	-1.45887	0.00997528	0.379523	0.366211	2056	tags=19%, list=16%, signal=16%	MAD2L1/RGCC/USP47/NDC80/CDT1/CDK1/PCNA/PSMA8/DYNC1LI1/FBXO5/ZFYVE19/PLK1/BUB3/PRMT2/BRSK1/E2F1/CDC6/CDK2/E2F8/PSMB6/E2F7/RB1/DONSON/AURKA/AURKB/CDC20/VPS4A/ORC1/GFI1B/PSMB9/PSMB7/MAD2L1BP/GPR132/MYO16/PSME2/GEN1/PSMB8/CCNB1
BP	GO:0090335	regulation of brown fat cell differentiation	20	0.849989	1.64083	0.0100321	0.379529	0.366217	5	tags=5%, list=0%, signal=5%	INS
MF	GO:0003730	mRNA 3'-UTR binding	71	0.730682	1.74481	0.0100783	0.379529	0.366217	1454	tags=21%, list=11%, signal=19%	PABPC4/IGF2BP1/IGF2BP2/RBMS2/CSDC2/RBM24/RPS7/IGF2BP3/SECISBP2L/PABPC1/CPEB4/TUT1/PUM1/CELF2/ANGEL2
CC	GO:0098982	GABA-ergic synapse	58	-0.712284	-1.64344	0.0101504	0.379606	0.366291	957	tags=26%, list=8%, signal=24%	GAP43/GABRR2/CSPG5/CDH13/GABRB1/DRD2/ATP2B1/SLITRK2/PTPRO/CLSTN1/GABRR1/GABRG3/PCLO/SLITRK3/ABHD6
BP	GO:0034508	centromere complex assembly	32	-0.814465	-1.69745	0.0102696	0.379606	0.366291	1038	tags=31%, list=8%, signal=29%	DLGAP5/HELLS/CENPK/CENPQ/CENPI/RB1/CENPT/CENPN/MIS18A/CENPP
BP	GO:0042733	embryonic digit morphogenesis	43	0.733943	1.62029	0.0102808	0.379606	0.366291	860	tags=21%, list=7%, signal=20%	TBC1D32/WNT7A/HAND2/FREM2/TBX2/ROR2/CREBBP/C2CD3/NOTCH1
BP	GO:1901160	primary amino compound metabolic process	11	0.89882	1.60215	0.010286	0.379606	0.366291	65	tags=18%, list=1%, signal=18%	DDC/TPH1
BP	GO:0071481	cellular response to X-ray	11	-0.878804	-1.58039	0.0103619	0.380502	0.367156	36	tags=18%, list=0%, signal=18%	NUCKS1/HAMP
MF	GO:0008187	poly-pyrimidine tract binding	22	0.825774	1.61868	0.0105132	0.382593	0.369173	953	tags=18%, list=7%, signal=17%	PABPC4/RBMS2/RPS7/PABPC1
BP	GO:0014823	response to activity	58	0.769787	1.76124	0.0105494	0.382593	0.369173	1069	tags=19%, list=8%, signal=17%	GCG/TNS2/TH/RYR2/PPARGC1A/ITGA2/IL10/CREB1/HIF1A/UQCRC1/SLC25A25
BP	GO:0031016	pancreas development	64	0.711398	1.66133	0.0105743	0.382593	0.369173	884	tags=19%, list=7%, signal=18%	NKX6-2/PAX6/PDX1/ISL1/RFX6/NEUROD1/EIF2AK3/MEIS2/PTF1A/ONECUT1/INSM1/PROX1
BP	GO:0030449	regulation of complement activation	35	-0.798548	-1.68316	0.0107056	0.384154	0.370679	1996	tags=54%, list=16%, signal=46%	CD59/CFH/C3/C4B/C8A/C7/VTN/CFB/CD55/CPB2/C4BPA/C5AR1/CFI/CLU/A2M/SERPING1/C1QA/CFP/C1QC
BP	GO:0070661	leukocyte proliferation	189	-0.599254	-1.59741	0.0107215	0.384154	0.370679	1080	tags=26%, list=8%, signal=24%	IL6ST/DOCK2/CD38/MSN/MIF/PRKCQ/GPR183/BCL6/TMIGD2/FKBP1B/HELLS/FCRL3/EBI3/CD55/TBK1/CRTAM/HLA-A/TIRAP/TFRC/RAC2/HAVCR2/BLK/HLA-G/RASGRP1/HLA-DPA1/CRP/CD6/CD276/ZAP70/CLU/PTPRC/IRF1/IL5RA/ADA/SYK/TLR9/TNFSF13B/LRRC32/SASH3/INPP5D/CSF1/HLA-DPB1/NCKAP1L/AIF1/CD3E/TWSG1/CD274/CSF1R/TNFRSF1B
BP	GO:0002446	neutrophil mediated immunity	383	-0.498269	-1.4211	0.0108791	0.387917	0.37431	2066	tags=26%, list=16%, signal=22%	CTSA/DNAJC5/RHOA/S100P/ORM1/CD59/LAMTOR2/GNS/SERPINB6/RHOG/CTSB/RAP1B/C3/DYNC1LI1/SYNGR1/FRK/VAT1/ARSA/QSOX1/BIN2/ITGAL/LRG1/DNASE1/RAB7A/MVP/NPC2/CLEC4C/DOK3/PGLYRP1/SLC27A2/CYFIP1/DOCK2/ATG7/CEACAM6/NEU1/CYB5R3/MIF/ARSB/PRSS3/ACTR2/LAMP1/TUSC2/PIGR/MOSPD2/GAA/STBD1/GSN/SIRPA/HEXB/BRI3/GRN/JAGN1/CD53/KCNAB2/CD55/CD93/RAB10/GMFG/B4GALT1/ADAM8/CTSD/LAMP2/CD63/PTPRB/CYBA/GLIPR1/PLAUR/PRDX4/PLA2G1B/…
BP	GO:0006909	phagocytosis	212	-0.560633	-1.51748	0.0109857	0.387982	0.374373	1940	tags=25%, list=15%, signal=22%	PIK3R1/APOA1/RHOG/VAV3/SOD1/C3/BIN2/ITGAL/RAB7A/C4B/XKR8/CYFIP1/DOCK2/IGLL1/C1orf43/ACTR2/PIP5K1C/TUSC2/ABI1/TYRO3/CSK/GSN/THBS1/SIRPA/ELMO1/IL2RG/CD93/C4BPA/GATA2/CYBA/RAC2/TMEM175/ARPC1B/P2RY6/CORO1C/RHOH/IL2RB/FCGR1A/VAV1/CRP/PTPRC/WAS/SYK/XKR5/ITGB2/SH3BP1/MARCO/CYFIP2/NCKAP1L/AIF1/ITGB3/IRF8/ARHGAP25
BP	GO:0006833	water transport	15	0.886823	1.67611	0.0109861	0.387982	0.374373	69	tags=20%, list=1%, signal=20%	SLC14A1/CFTR/AQP8
BP	GO:0010676	positive regulation of cellular carbohydrate metabolic process	44	0.718727	1.58469	0.011222	0.392302	0.378542	5	tags=5%, list=0%, signal=5%	GCG/INS
MF	GO:0005158	insulin receptor binding	20	0.846544	1.63419	0.0112573	0.392302	0.378542	5	tags=5%, list=0%, signal=5%	INS
BP	GO:0032943	mononuclear cell proliferation	171	-0.587161	-1.54483	0.0112679	0.392302	0.378542	1548	tags=27%, list=12%, signal=24%	IL6ST/DOCK2/CD38/MSN/MIF/PRKCQ/GPR183/BCL6/TMIGD2/FKBP1B/HELLS/FCRL3/EBI3/CD55/TBK1/CRTAM/HLA-A/TIRAP/TFRC/RAC2/HAVCR2/BLK/HLA-G/RASGRP1/HLA-DPA1/CRP/CD6/CD276/ZAP70/PTPRC/IRF1/ADA/SYK/TLR9/TNFSF13B/LRRC32/SASH3/INPP5D/CSF1/HLA-DPB1/NCKAP1L/AIF1/CD3E/TWSG1/CD274/TNFRSF1B
BP	GO:0002460	adaptive immune response based on somatic recombination of immune receptors built from immunoglobulin superfamily domains	161	-0.561301	-1.47476	0.0114153	0.393346	0.379549	1427	tags=27%, list=11%, signal=24%	IGLL1/FUT7/PRKCQ/BCL6/CD27/ICAM1/LTA/PARP3/UNG/JAG1/MR1/MLH1/LOXL3/EBI3/CD55/SMAD7/C4BPA/HLA-A/TFRC/HAVCR2/B2M/IL1RL1/TRAF2/HLA-G/CTSC/SLAMF6/LY9/SWAP70/CRP/CFI/KLHL6/CLU/PTPRC/WAS/ADA/TNFSF13B/SASH3/SERPING1/C1QA/INPP5D/C1QC/CD274/TNFRSF1B
BP	GO:0043486	histone exchange	32	-0.801502	-1.67043	0.0114349	0.393346	0.379549	862	tags=22%, list=7%, signal=20%	CENPK/CENPQ/CENPI/CENPT/CENPN/MIS18A/CENPP
MF	GO:0017110	nucleoside-diphosphatase activity	13	-0.884776	-1.60568	0.0115479	0.393346	0.379549	7	tags=15%, list=0%, signal=15%	NUDT15/ENTPD3
BP	GO:0010324	membrane invagination	61	-0.735228	-1.7113	0.0115596	0.393346	0.379549	1126	tags=25%, list=9%, signal=23%	GSN/THBS1/ELMO1/GATA2/RAC2/AURKB/RHOH/FCGR1A/XKR5/ITGB2/SH3BP1/MARCO/NCKAP1L/AIF1/ARHGAP25
BP	GO:0097530	granulocyte migration	93	-0.63766	-1.56401	0.0116137	0.393346	0.379549	1407	tags=33%, list=11%, signal=30%	FUT7/PIP5K1C/CXCL8/MOSPD2/CXCL2/THBS1/JAGN1/CMKLR1/ADAM8/CKLF/SLAMF8/TIRAP/UMODL1/RAC2/PLA2G1B/PIK3CD/C5AR1/RHOH/VAV1/CXCL10/SAA1/CSF3R/PREX1/SYK/ITGB2/CSF1/PTGER4/NCKAP1L/CCR7/CCL3/CSF1R
BP	GO:0045123	cellular extravasation	43	-0.714045	-1.5595	0.0116176	0.393346	0.379549	1407	tags=30%, list=11%, signal=27%	ITGAL/FUT7/ICAM1/SIRPA/ADAM8/PLVAP/FUT9/SELP/PIK3CD/SELPLG/ADD2/ITGB2/PTGER4
BP	GO:1901988	negative regulation of cell cycle phase transition	206	-0.546574	-1.4718	0.0117068	0.394555	0.380716	2056	tags=20%, list=16%, signal=17%	MAD2L1/RGCC/USP47/NDC80/CDT1/CDK1/PCNA/PSMA8/DYNC1LI1/FBXO5/ZFYVE19/PLK1/BABAM1/ATF5/BUB3/PRMT2/BRSK1/E2F1/CDC6/CDK2/E2F8/PSMB6/SUSD2/E2F7/RB1/DONSON/AURKA/AURKB/CDC20/VPS4A/ORC1/GFI1B/PSMB9/PSMB7/MAD2L1BP/GPR132/MYO16/PSME2/GEN1/PSMB8/CCNB1
CC	GO:0031300	intrinsic component of organelle membrane	318	-0.513491	-1.44221	0.0118245	0.396711	0.382796	1816	tags=14%, list=14%, signal=12%	TRAM2/SYNGR1/QSOX1/SPPL2A/RAB11B/SFXN2/POMGNT1/SLC38A9/SLC27A2/DPM2/TAP2/RAB35/SLC46A3/AUP1/DHCR7/LAMP1/STIM1/ACER2/SYNPR/BCAP31/MICU1/TEX261/LAMP2/HLA-A/SYN1/HACD2/B2M/TECR/HLA-G/HLA-DPA1/GDAP1/MFNG/TMEM163/CLSTN1/SFXN5/PTPRS/SGMS2/SYPL1/PTPRN2/DGAT2/HLA-DPB1/MGARP/SLC17A7/SCD/TRABD2B
BP	GO:1903961	positive regulation of anion transmembrane transport	45	0.734152	1.6222	0.0119456	0.397714	0.383763	429	tags=11%, list=3%, signal=11%	INS/CFTR/ACSL5/SLC26A6/CLIP3
BP	GO:0032946	positive regulation of mononuclear cell proliferation	79	-0.685467	-1.64413	0.0119948	0.397714	0.383763	1548	tags=38%, list=12%, signal=34%	IL6ST/CD38/MIF/PRKCQ/GPR183/BCL6/TMIGD2/FCRL3/EBI3/CD55/HLA-A/TIRAP/TFRC/HAVCR2/HLA-DPA1/CD6/CD276/ZAP70/PTPRC/ADA/SYK/TLR9/TNFSF13B/SASH3/CSF1/HLA-DPB1/NCKAP1L/AIF1/CD3E/CD274
BP	GO:0006959	humoral immune response	121	-0.648444	-1.64233	0.0120509	0.397714	0.383763	1675	tags=31%, list=13%, signal=28%	C4B/C8A/PGLYRP1/C7/IGLL1/PRSS3/GPR183/VTN/CXCL8/LTA/CXCL2/CFB/EBI3/CD55/CPB2/C4BPA/HLA-A/SH2D1A/PLA2G1B/IL17F/C5AR1/MFAP4/CRP/CFI/CXCL10/CLU/PTPRC/A2M/PGLYRP2/PAX5/SERPING1/C1QA/CFP/LYZ/C1QC/CCR7/OCIAD2/LEAP2
MF	GO:0001968	fibronectin binding	23	-0.802157	-1.60527	0.0121395	0.397714	0.383763	1220	tags=35%, list=10%, signal=32%	LRRC15/THBS1/LOXL3/HSD17B12/CTSS/IGFBP6/ITGB3/CTSK
BP	GO:0045124	regulation of bone resorption	36	-0.745578	-1.57617	0.0121426	0.397714	0.383763	1519	tags=42%, list=12%, signal=37%	ATP6AP1/CD38/TNFRSF11B/CSK/ADAM8/TFRC/SIGLEC15/TMEM119/SYK/CALCA/CA2/INPP5D/ITGB3/CSF1R/HAMP
BP	GO:0002833	positive regulation of response to biotic stimulus	168	-0.54843	-1.44504	0.0121817	0.397714	0.383763	881	tags=14%, list=7%, signal=13%	ADAM8/TBK1/CRTAM/PSMB6/CYBA/HAVCR2/WNT5A/SH2D1A/MED1/HLA-G/IL17F/RASGRP1/SLAMF6/VAV1/PSMB9/PSMB7/SYK/PSME2/PSMB8/CLEC10A/CD274/SH2D1B/CLNK/CLEC4D
BP	GO:1903959	regulation of anion transmembrane transport	81	0.660277	1.59751	0.0122989	0.397714	0.383763	429	tags=7%, list=3%, signal=7%	INS/CFTR/ACSL5/RGS2/SLC26A6/CLIP3
MF	GO:0055102	lipase inhibitor activity	11	-0.871802	-1.5678	0.0123355	0.397714	0.383763	232	tags=27%, list=2%, signal=27%	APOA1/ANXA2/SNCB
BP	GO:0006334	nucleosome assembly	49	-0.696781	-1.57484	0.0123393	0.397714	0.383763	1387	tags=22%, list=11%, signal=20%	MCM2/UBN1/ASF1A/CENPK/CENPQ/CENPI/CENPT/CHAF1A/CENPN/MIS18A/CENPP
MF	GO:0016887	ATPase activity	372	0.523459	1.44282	0.0124359	0.399045	0.385048	1479	tags=15%, list=12%, signal=13%	ABCC12/CFTR/ACSL5/DYNC2H1/MOV10L1/HELZ2/KIF19/MYH3/ABCA4/ABCG4/VWA8/KIFC3/ABCD2/HSPA13/ATP13A3/DDX46/ABCC4/ATP10A/CHD4/DICER1/MYO5C/DDX43/ACSBG2/KIF16B/MDN1/EP400/HSPA8/UPF1/PEX6/ABCC1/HELQ/DDX10/MOV10/DDX21/DDX28/EIF4A1/CHD7/DDX1/KIF1B/DNAH10/DHX9/MYO5B/CCT8/KIFC1/DHX58/DDX19B/KIF6/TDRD9/KIF3B/ACSL1/DNAH5/KIF21A/ATP10D/MYO10
CC	GO:0005844	polysome	62	0.713291	1.66136	0.0124887	0.399045	0.385048	1471	tags=47%, list=12%, signal=42%	EIF3H/GCN1/RPS21/RPS23/RPS26/RPL11/RPL31/RPS3/RPL7A/RPL10A/RPS6/RPL30/RPL8/RPL39/RPS4X/RPL18A/RPL6/BTF3/RPL24/EIF2S1/HDLBP/RPL36A/RPS28/RPL36/RPS29/RPL18/DHX9/RPL32/EIF4G1
CC	GO:0035579	specific granule membrane	70	-0.682677	-1.60871	0.012568	0.399209	0.385207	995	tags=19%, list=8%, signal=17%	CD53/KCNAB2/CD93/ADAM8/PTPRB/CYBA/PLAUR/SNAP25/ADGRG3/PLAU/ITGB2/TNFRSF1B/CLEC4D
BP	GO:2000514	regulation of CD4-positive, alpha-beta T cell activation	35	-0.776066	-1.63577	0.0127174	0.399209	0.385207	1358	tags=34%, list=11%, signal=31%	PRKCQ/BCL6/LOXL3/CD55/SMAD7/MYB/RUNX3/SASH3/NCKAP1L/TWSG1/CD274/RUNX1
BP	GO:0002688	regulation of leukocyte chemotaxis	81	-0.666695	-1.6013	0.0127743	0.399209	0.385207	1260	tags=26%, list=10%, signal=24%	PRSS56/CXCL8/MOSPD2/MST1/THBS1/CMKLR1/SLAMF8/TIRAP/RAC2/WNT5A/CCR1/C5AR1/SWAP70/CXCL10/LGMN/CSF1/NCKAP1L/AIF1/CCR7/CCL3/CSF1R
BP	GO:0034656	nucleobase-containing small molecule catabolic process	39	-0.720644	-1.54876	0.0127784	0.399209	0.385207	1307	tags=15%, list=10%, signal=14%	NT5C3A/NUDT15/MGAT1/GALT/ADA/ENTPD3
BP	GO:0043247	telomere maintenance in response to DNA damage	11	-0.869464	-1.56359	0.0128994	0.399209	0.385207	14	tags=18%, list=0%, signal=18%	APEX1/DCLRE1A
BP	GO:0072001	renal system development	244	0.558527	1.51796	0.0129056	0.399209	0.385207	1439	tags=19%, list=11%, signal=17%	TBC1D32/LRP2/TNS2/BMPER/ADAMTS1/DYNC2H1/TGFBR1/SLIT2/FREM2/FGFR2/MMP9/FOXJ1/MAGI2/STRA6/FOXD1/HSPB11/ASXL1/VANGL2/WNT11/LRRK2/SIX4/KCNJ8/POU3F3/SULF1/FMN1/NFIA/TGFB2/NOTCH1/DLG5/PROX1/MPV17/ARID5B/LAMA5/CRLF1/ACTA2/MYC/NOTCH2/UMOD/PDGFRA/ACE/SEC61A1/PLXND1/PTCH1/HPGD/GREM1/LZTS2/SMO
BP	GO:0016064	immunoglobulin mediated immune response	75	-0.623463	-1.49293	0.0129068	0.399209	0.385207	1808	tags=32%, list=14%, signal=28%	C3/NDFIP1/C4B/C8A/C7/IGLL1/BCL6/CD27/LTA/PARP3/UNG/MLH1/CD55/C4BPA/TFRC/SWAP70/CRP/CFI/CLU/PTPRC/SERPING1/C1QA/INPP5D/C1QC
BP	GO:0044270	cellular nitrogen compound catabolic process	492	0.488998	1.3849	0.0129266	0.399209	0.385207	1291	tags=22%, list=10%, signal=21%	PABPC4/IGF2BP1/DPEP1/IGF2BP2/RPLP0/RPL37/PDE8B/HELZ2/RPS11/RPL21/ACOT7/RPS21/RPS19/RPS9/RPS27A/RPS16/RPS20/RPS23/RPL28/RPL13/RPL13A/RPS26/RPS13/RPL12/FASTKD5/RPL11/RPS2/HMOX1/RPL14/SMG7/PDE9A/RPL23/CSDC2/RPS8/RPL31/NBAS/RPL27A/RPS3/CSDE1/DNASE2B/RPL7A/RPS14/RPL10A/RPS6/RPL15/PDE7B/RPL30/RPS12/RPSA/HSPB1/RPL8/RBM24/RPS25/RPS15/RPL39/RPL29/RPL4/RPL9/RPL35/RPL37A/AGO4/RPL10/RPS15A/RPS7/AXIN2/RPL3/RP…
BP	GO:0046887	positive regulation of hormone secretion	97	0.679014	1.6636	0.0130221	0.400068	0.386036	179	tags=7%, list=1%, signal=7%	GCG/INS/NMB/CFTR/PDX1/ISL1/RFX6
MF	GO:0004601	peroxidase activity	34	-0.725347	-1.5128	0.0130628	0.400068	0.386036	1456	tags=32%, list=11%, signal=29%	GPX1/MGST3/GPX5/CYGB/GPX4/PRDX4/PRDX5/HBZ/PRDX6/TPO/HBE1
BP	GO:0021955	central nervous system neuron axonogenesis	31	0.772092	1.65063	0.0131845	0.400991	0.386926	1227	tags=26%, list=10%, signal=23%	SLIT2/EPHB1/SZT2/MYCBP2/CHRNB2/HSP90AB1/PHOX2B/NFIB
BP	GO:1905523	positive regulation of macrophage migration	16	-0.828486	-1.55717	0.0132016	0.400991	0.386926	1344	tags=44%, list=11%, signal=39%	P2RY12/THBS1/CMKLR1/C5AR1/CSF1/CCL3/CSF1R
BP	GO:0071480	cellular response to gamma radiation	22	0.816292	1.60009	0.0132757	0.40159	0.387504	6	tags=5%, list=0%, signal=5%	ELK1
BP	GO:0042116	macrophage activation	70	-0.675806	-1.59252	0.0134013	0.40345	0.389299	1426	tags=34%, list=11%, signal=31%	MIF/CST7/TLR3/THBS1/GRN/CD93/SNCA/CEBPA/CD200/HAVCR2/WNT5A/IL1RL1/CTSC/TLR1/C5AR1/TLR7/CLU/PTPRC/SYK/ITGB2/C1QA/AIF1/CCL3/HAMP
BP	GO:0045785	positive regulation of cell adhesion	306	-0.522074	-1.46098	0.0134465	0.40345	0.389299	1766	tags=23%, list=14%, signal=20%	PDGFB/CITED2/EPO/SHH/PODXL/CIB1/EGFL6/ITGA6/IL6ST/COL26A1/APBB1IP/FGG/CEACAM6/FUT7/PRKCQ/P2RY12/BCL6/CD27/ICAM1/DUSP26/SPOCK2/TMIGD2/CSK/TESPA1/SIRPA/EBI3/CD55/SMAD7/ADAM8/CSPG5/CDH13/HLA-A/XBP1/DMTN/PDPN/TFRC/HSD17B12/NPNT/HAVCR2/PLAUR/WNT5A/SELP/OLFM4/HLA-G/HLA-DPA1/MYB/RHOH/VAV1/SKAP1/CD6/CD276/ZAP70/SAA1/PTPRC/RUNX3/PREX1/ADA/SYK/ITGB2/TNFSF13B/SASH3/CSF1/HLA-DPB1/NCKAP1L/AIF1/RELL2/CD3E/CCR7…
BP	GO:0042129	regulation of T cell proliferation	97	-0.621702	-1.53167	0.0135157	0.403883	0.389716	994	tags=26%, list=8%, signal=24%	EBI3/CD55/CRTAM/HLA-A/TFRC/RAC2/HAVCR2/HLA-G/HLA-DPA1/CD6/CD276/ZAP70/PTPRC/IRF1/SYK/TNFSF13B/LRRC32/SASH3/HLA-DPB1/NCKAP1L/AIF1/CD3E/TWSG1/CD274/TNFRSF1B
MF	GO:0019843	rRNA binding	53	0.748028	1.70222	0.0136021	0.404827	0.390628	1090	tags=42%, list=9%, signal=38%	RPLP0/RPL37/RPS11/RPS9/RPS13/RPL12/FASTKD5/RPL11/RPL23/RPS3/RPS14/RPL8/RPL9/RPL3/RPS4X/RPL23A/GTF3A/PPAN/RPS5/RPS18/DDX21/DDX28
BP	GO:0090277	positive regulation of peptide hormone secretion	74	0.717806	1.71532	0.0137034	0.406203	0.391955	179	tags=8%, list=1%, signal=8%	GCG/INS/CFTR/PDX1/ISL1/RFX6
BP	GO:0072507	divalent inorganic cation homeostasis	353	-0.472941	-1.33757	0.014205	0.419388	0.404678	1333	tags=17%, list=10%, signal=16%	CIB2/SLC1A1/TMTC2/STIM1/ANK2/CALB2/JPH3/ADCY8/TMBIM6/JPH1/SLC8A2/CCR4/BCAP31/FKBP1B/HEXB/CD55/MICU1/CMKLR1/MICU2/F2RL2/SNCA/P2RY1/GPR174/GATA2/PTGIR/DRD2/WNT5A/PLA2G1B/ATP2C1/XCR1/GRIN1/GRIK2/P2RY6/ATP2B1/CCR1/CHRNA9/KEL/C5AR1/SWAP70/PKD1/P2RY8/SLC24A4/SLC30A4/CXCL10/SAA1/ADCYAP1/PTPRC/GNG3/TMEM38A/CALCA/FASLG/ADCY5/CXCR3/DMD/PTGER4/CCR7/CCL3/APOE/SLC30A1/GPR18/GRIN2C
BP	GO:0051028	mRNA transport	126	0.632242	1.5977	0.0144263	0.422608	0.407785	2026	tags=21%, list=16%, signal=18%	IGF2BP1/IGF2BP2/NUP210/YTHDC1/SMG7/SEH1L/NUP205/LRPPRC/IGF2BP3/QKI/UPF1/SMG1/DHX9/DDX19B/SUPT6H/RBM15B/HSF1/THOC2/MCM3AP/NUP214/RANBP2/SETD2/ZC3H3/NUP153/FYTTD1/ZFP36L1/FIP1L1
BP	GO:0046637	regulation of alpha-beta T cell differentiation	40	-0.744603	-1.60673	0.0144286	0.422608	0.407785	1001	tags=28%, list=8%, signal=25%	BCL6/LOXL3/SMAD7/MYB/ZAP70/RUNX3/ADA/SYK/SASH3/NCKAP1L/RUNX1
BP	GO:0030098	lymphocyte differentiation	246	-0.539204	-1.48229	0.0146913	0.426863	0.411891	1337	tags=22%, list=11%, signal=20%	GPR183/TUSC2/BCL6/INHBA/CD27/FZD7/TYRO3/TESPA1/MR1/FCRL3/LOXL3/MAFB/FANCD2/SMAD7/ADAM8/CRTAM/SLAMF8/XBP1/NRARP/B2M/LYL1/PIK3CD/CD2/HLA-G/SLAMF6/MYB/MFNG/LY9/RHOH/VAV1/SLC46A2/IKZF1/ZAP70/ADGRG3/PTPRC/RUNX3/IRF1/PGLYRP2/PREX1/HDAC9/ADA/SYK/TLR9/SASH3/INPP5D/PTGER4/NCKAP1L/CD3E/ITK/SPI1/CCR7/CD3D/RUNX1
BP	GO:0000028	ribosomal small subunit assembly	16	0.848052	1.61339	0.0148724	0.426863	0.411891	998	tags=44%, list=8%, signal=40%	RPS19/RPS14/RPSA/RPS15/RPS5/RPS28/RPS10
BP	GO:0045061	thymic T cell selection	18	-0.852214	-1.64607	0.0149019	0.426863	0.411891	316	tags=39%, list=2%, signal=38%	SHH/DOCK2/ZAP70/PTPRC/CD3E/CCR7/CD3D
BP	GO:2000515	negative regulation of CD4-positive, alpha-beta T cell activation	18	-0.852932	-1.64746	0.0149019	0.426863	0.411891	1278	tags=39%, list=10%, signal=35%	BCL6/LOXL3/SMAD7/RUNX3/TWSG1/CD274/RUNX1
BP	GO:0031638	zymogen activation	41	-0.702133	-1.52344	0.015017	0.426863	0.411891	1114	tags=24%, list=9%, signal=22%	THBS1/F9/CPB2/CIDEB/PERP/PLAU/LGMN/CYFIP2/RUNX1/F11
BP	GO:0042098	T cell proliferation	116	-0.58972	-1.47739	0.0151757	0.426863	0.411891	1144	tags=24%, list=9%, signal=22%	TMIGD2/FKBP1B/EBI3/CD55/CRTAM/HLA-A/TFRC/RAC2/HAVCR2/HLA-G/RASGRP1/HLA-DPA1/CD6/CD276/ZAP70/PTPRC/IRF1/SYK/TNFSF13B/LRRC32/SASH3/HLA-DPB1/NCKAP1L/AIF1/CD3E/TWSG1/CD274/TNFRSF1B
BP	GO:0034374	low-density lipoprotein particle remodeling	11	-0.862789	-1.55159	0.0154425	0.426863	0.411891	52	tags=18%, list=0%, signal=18%	APOB/APOE
BP	GO:1990748	cellular detoxification	71	-0.675257	-1.59616	0.0155784	0.426863	0.411891	1456	tags=21%, list=11%, signal=19%	GPX1/MGST3/GPX5/CYGB/GPX4/FANCC/PRDX4/PRDX5/HBZ/TXN/PRDX6/TPO/HBE1/APOE/APOA4
BP	GO:0031349	positive regulation of defense response	237	-0.534506	-1.46045	0.0155842	0.426863	0.411891	883	tags=14%, list=7%, signal=13%	SNCA/ADAM8/CEBPA/TBK1/CRH/CRTAM/PSMB6/CYBA/HAVCR2/WNT5A/SH2D1A/MED1/IL1RL1/HLA-G/CTSC/RASGRP1/SLAMF6/VAV1/TLR7/PSMB9/PSMB7/SYK/TLR9/PSME2/PSMB8/PTGER4/CLEC10A/CCR7/CCL3/SH2D1B/CLNK/CLEC4D
BP	GO:0046628	positive regulation of insulin receptor signaling pathway	19	0.853683	1.65431	0.0155969	0.426863	0.411891	5	tags=5%, list=0%, signal=5%	INS
BP	GO:0060831	smoothened signaling pathway involved in dorsal/ventral neural tube patterning	10	0.896753	1.58191	0.0156583	0.426863	0.411891	16	tags=10%, list=0%, signal=10%	TBC1D32
MF	GO:1904315	transmitter-gated ion channel activity involved in regulation of postsynaptic membrane potential	37	-0.73267	-1.55073	0.0157711	0.426863	0.411891	1440	tags=32%, list=11%, signal=29%	GABRA6/CHRNA1/GABRG2/GRIK4/GABRR2/GRID2/GABRB1/GRIK2/CHRNA9/GABRR1/GABRG3/GRIN2C
BP	GO:0019319	hexose biosynthetic process	74	0.687838	1.64371	0.0158116	0.426863	0.411891	588	tags=15%, list=5%, signal=14%	GCG/INS/PGAM2/ATF3/FAM3C/CRTC2/PC/SIRT7/PGK1/PPARGC1A/SLC39A14
BP	GO:0055065	metal ion homeostasis	460	-0.475566	-1.36789	0.0158675	0.426863	0.411891	1794	tags=22%, list=14%, signal=19%	KNG1/NDFIP1/EDN1/TMTC4/CASQ1/EPO/DHRS7C/MCOLN3/SLC46A1/S100A14/ATOX1/CASQ2/CYBRD1/CAV2/SLC8A1/COX19/C7/TMPRSS6/ATP6AP1/CNGB1/CXCR4/CD38/SLC24A2/CTRC/CIB2/SLC1A1/TMTC2/STIM1/ANK2/CALB2/JPH3/ADCY8/TMBIM6/JPH1/SLC8A2/CCR4/CCDC115/FLVCR1/BCAP31/FKBP1B/HEXB/ATP1A1/CD55/MICU1/SLC9A1/CMKLR1/MICU2/CP/F2RL2/SNCA/P2RY1/GPR174/GATA2/CCDC22/PTGIR/DRD2/TFRC/WNT5A/PLA2G1B/ATP2C1/B2M/XCR1/SNX5/GRIN1/GRIK2/P2RY6…
BP	GO:0002474	antigen processing and presentation of peptide antigen via MHC class I	83	-0.618228	-1.49381	0.015971	0.426863	0.411891	1085	tags=18%, list=9%, signal=17%	NCF1/TAP2/MR1/BCAP31/PSMB6/HLA-A/CYBA/B2M/HLA-G/FCGR1A/PSMB9/PSMB7/TAPBPL/PSME2/PSMB8
MF	GO:0001637	G protein-coupled chemoattractant receptor activity	16	-0.823522	-1.54784	0.0160402	0.426863	0.411891	1481	tags=44%, list=12%, signal=39%	CXCR4/CCR4/CMKLR1/XCR1/CCR1/CXCR3/CCR7
MF	GO:0004950	chemokine receptor activity	16	-0.823522	-1.54784	0.0160402	0.426863	0.411891	1481	tags=44%, list=12%, signal=39%	CXCR4/CCR4/CMKLR1/XCR1/CCR1/CXCR3/CCR7
MF	GO:0005230	extracellular ligand-gated ion channel activity	58	-0.682848	-1.57553	0.0161342	0.426863	0.411891	954	tags=21%, list=8%, signal=19%	GRIK4/GABRR2/GRID2/GABRB1/GRIN1/GRIK2/CHRNA9/GRIA2/GABRR1/GABRG3/GABRD/GRIN2C
BP	GO:0006958	complement activation, classical pathway	21	-0.816935	-1.61707	0.0161857	0.426863	0.411891	1808	tags=62%, list=14%, signal=53%	C3/C4B/C8A/C7/IGLL1/CD55/C4BPA/CRP/CFI/CLU/SERPING1/C1QA/C1QC
BP	GO:0007200	phospholipase C-activating G protein-coupled receptor signaling pathway	80	-0.635684	-1.5277	0.0162076	0.426863	0.411891	915	tags=18%, list=7%, signal=16%	CMKLR1/F2RL2/P2RY1/GPR174/DRD2/LTB4R/SLC9A3R1/P2RY6/C5AR1/P2RY8/ADRA2A/P2RY11/CALCA/GPR18
MF	GO:0003841	1-acylglycerol-3-phosphate O-acyltransferase activity	12	-0.875491	-1.58554	0.0162243	0.426863	0.411891	520	tags=33%, list=4%, signal=32%	AGPAT5/LPCAT2/GPAT3/AGPAT4
BP	GO:0060218	hematopoietic stem cell differentiation	76	-0.646909	-1.54888	0.0162678	0.426863	0.411891	991	tags=13%, list=8%, signal=12%	TAL1/GATA2/PSMB6/MYB/PSMB9/PSMB7/PSME2/PSMB8/RUNX1/OCIAD2
BP	GO:0006323	DNA packaging	122	-0.573302	-1.45345	0.0164009	0.426863	0.411891	1387	tags=18%, list=11%, signal=16%	MCM2/BANF1/UBN1/DFFB/NCAPD2/SMC5/SYCP1/HELLS/ASF1A/CENPK/CENPQ/CENPI/CENPT/CHAF1A/MCPH1/PPHLN1/NCAPD3/NUSAP1/CENPN/MIS18A/CCNB1/CENPP
BP	GO:0006874	cellular calcium ion homeostasis	320	-0.494236	-1.38797	0.0164078	0.426863	0.411891	1333	tags=18%, list=10%, signal=17%	CIB2/STIM1/ANK2/CALB2/JPH3/ADCY8/TMBIM6/JPH1/SLC8A2/CCR4/BCAP31/FKBP1B/HEXB/CD55/MICU1/CMKLR1/MICU2/F2RL2/SNCA/P2RY1/GPR174/GATA2/PTGIR/DRD2/WNT5A/PLA2G1B/ATP2C1/XCR1/GRIN1/GRIK2/P2RY6/ATP2B1/CCR1/CHRNA9/KEL/C5AR1/SWAP70/PKD1/P2RY8/SLC24A4/CXCL10/SAA1/ADCYAP1/PTPRC/GNG3/TMEM38A/CALCA/FASLG/ADCY5/CXCR3/DMD/PTGER4/CCR7/CCL3/APOE/SLC30A1/GPR18/GRIN2C
BP	GO:0038095	Fc-epsilon receptor signaling pathway	97	-0.60834	-1.49875	0.0164596	0.426863	0.411891	1058	tags=12%, list=8%, signal=11%	PPP3R1/TEC/TEC/PSMB6/VAV1/PSMB9/PSMB7/SYK/PSME2/LCP2/PSMB8/ITK
MF	GO:0016411	acylglycerol O-acyltransferase activity	17	-0.827392	-1.58539	0.0164747	0.426863	0.411891	658	tags=35%, list=5%, signal=34%	AGPAT5/MOGAT2/LPCAT2/DGAT2/GPAT3/AGPAT4
BP	GO:0043367	CD4-positive, alpha-beta T cell differentiation	49	-0.680177	-1.53731	0.0164891	0.426863	0.411891	1407	tags=27%, list=11%, signal=24%	FUT7/GPR183/BCL6/LOXL3/SMAD7/SLAMF6/MYB/LY9/RUNX3/SASH3/PTGER4/NCKAP1L/RUNX1
BP	GO:0045913	positive regulation of carbohydrate metabolic process	64	0.679756	1.58744	0.0165691	0.426863	0.411891	5	tags=3%, list=0%, signal=3%	GCG/INS
BP	GO:0010828	positive regulation of glucose transmembrane transport	34	0.740865	1.61387	0.0165725	0.426863	0.411891	1081	tags=15%, list=9%, signal=13%	INS/CLIP3/ADIPOR2/NR4A3/INSR
CC	GO:0101003	ficolin-1-rich granule membrane	45	-0.703252	-1.55058	0.0166384	0.426863	0.411891	1157	tags=36%, list=9%, signal=32%	CLEC4C/DOK3/LAMP1/GAA/STBD1/SIRPA/CD55/CD93/ADAM8/LAMP2/PRCP/SIGLEC5/PTPRN2/ITGB2/NCKAP1L/CLEC4D
BP	GO:0042113	B cell activation	178	-0.517647	-1.36477	0.0167307	0.426863	0.411891	1478	tags=19%, list=12%, signal=17%	CD38/IGLL1/MIF/GPR183/BCL6/INHBA/CD27/PARP3/SKAP2/UNG/MLH1/FCRL3/SAMSN1/SLAMF8/XBP1/TIRAP/TFRC/BLK/LYL1/PIK3CD/RASGRP1/MFNG/SWAP70/ZAP70/ADGRG3/PTPRC/HDAC9/ADA/SYK/TLR9/TNFSF13B/SASH3/INPP5D/NCKAP1L
BP	GO:1901532	regulation of hematopoietic progenitor cell differentiation	82	-0.633389	-1.52436	0.0167307	0.426863	0.411891	991	tags=12%, list=8%, signal=11%	TAL1/GATA2/PSMB6/MYB/PSMB9/PSMB7/PSME2/PSMB8/RUNX1/OCIAD2
BP	GO:0006403	RNA localization	198	0.570722	1.52695	0.0167497	0.426863	0.411891	2026	tags=18%, list=16%, signal=16%	IGF2BP1/IGF2BP2/NUP210/YTHDC1/SMG7/SEH1L/RPS15/NUP205/LRPPRC/CCT2/IGF2BP3/QKI/UPF1/SMG1/DHX9/CCT8/KHDRBS1/DDX19B/SUPT6H/RBM15B/TCP1/HSF1/THOC2/TOMM20/MCM3AP/NUP214/CCT3/RANBP2/SETD2/ZC3H3/NUP153/RFTN2/FYTTD1/ZFP36L1/EIF6/FIP1L1
BP	GO:0035710	CD4-positive, alpha-beta T cell activation	59	-0.724417	-1.67879	0.0167572	0.426863	0.411891	1407	tags=29%, list=11%, signal=26%	FUT7/PRKCQ/GPR183/BCL6/LOXL3/CD55/SMAD7/SLAMF6/MYB/LY9/RUNX3/SASH3/PTGER4/NCKAP1L/TWSG1/CD274/RUNX1
BP	GO:0051236	establishment of RNA localization	165	0.603137	1.57722	0.0167894	0.426863	0.411891	2026	tags=19%, list=16%, signal=17%	IGF2BP1/IGF2BP2/NUP210/YTHDC1/SMG7/SEH1L/RPS15/NUP205/LRPPRC/IGF2BP3/QKI/UPF1/SMG1/DHX9/KHDRBS1/DDX19B/SUPT6H/RBM15B/HSF1/THOC2/TOMM20/MCM3AP/NUP214/RANBP2/SETD2/ZC3H3/NUP153/RFTN2/FYTTD1/ZFP36L1/EIF6/FIP1L1
BP	GO:1990266	neutrophil migration	75	-0.614773	-1.47212	0.0168824	0.426863	0.411891	1407	tags=35%, list=11%, signal=31%	FUT7/PIP5K1C/CXCL8/MOSPD2/CXCL2/JAGN1/ADAM8/CKLF/SLAMF8/TIRAP/UMODL1/RAC2/PLA2G1B/PIK3CD/C5AR1/RHOH/VAV1/CXCL10/SAA1/CSF3R/PREX1/SYK/ITGB2/NCKAP1L/CCR7/CCL3
BP	GO:1902105	regulation of leukocyte differentiation	190	-0.565144	-1.50568	0.0170072	0.426863	0.411891	1278	tags=22%, list=10%, signal=20%	BCL6/INHBA/CD27/TLR3/TESPA1/FCRL3/LOXL3/TAL1/MAFB/FANCD2/SMAD7/ADAM8/CRTAM/GATA2/SLAMF8/XBP1/RB1/NRARP/CD2/HLA-G/ZBTB46/CCR1/MYB/RHOH/SLC46A2/ZAP70/PTPRC/RUNX3/IRF1/PGLYRP2/ADA/SYK/CA2/TLR9/SASH3/INPP5D/CSF1/NCKAP1L/C1QC/CCL3/RUNX1
BP	GO:0001773	myeloid dendritic cell activation	21	-0.814935	-1.61311	0.0170606	0.426863	0.411891	667	tags=19%, list=5%, signal=18%	HAVCR2/CD2/SPI1/CLEC4D
BP	GO:0034370	triglyceride-rich lipoprotein particle remodeling	10	-0.880968	-1.55043	0.0171102	0.426863	0.411891	52	tags=50%, list=0%, signal=50%	APOA1/APOB/LCAT/APOE/APOA4
CC	GO:0000779	condensed chromosome, centromeric region	97	-0.600767	-1.48009	0.0172625	0.426863	0.411891	2382	tags=32%, list=19%, signal=26%	KNTC1/NUP43/GPATCH11/DSN1/MAD2L1/NDC80/CDT1/FBXO28/CENPV/ORC2/DYNC1LI1/PLK1/CSNK1A1/BUB3/ANAPC16/ERCC6L/NUDCD2/SPC24/NUP37/NCAPD2/KIF2C/CENPK/CENPT/NUF2/SKA3/ZWILCH/AURKB/NCAPD3/NEK2/CENPN/CCNB1
CC	GO:0000502	proteasome complex	55	-0.656898	-1.5023	0.0172934	0.426863	0.411891	822	tags=9%, list=6%, signal=9%	PSMB6/PSMB9/PSMB7/PSME2/PSMB8
CC	GO:0005766	primary lysosome	116	-0.576562	-1.44442	0.0173244	0.426863	0.411891	2177	tags=35%, list=17%, signal=30%	RAB5C/VAPA/CPPED1/NCSTN/SNAP29/PYCARD/DSN1/GM2A/CTSA/DNAJC5/GNS/RAP1B/C3/SYNGR1/FRK/VAT1/ARSA/NPC2/CEACAM6/CYB5R3/ARSB/ACTR2/LAMP1/PIGR/GAA/HEXB/BRI3/GRN/B4GALT1/LAMP2/CD63/GLIPR1/PRCP/CTSC/RNASET2/AGA/PSAP/GLB1/PRDX6/ANXA2/LYZ
CC	GO:0042582	azurophil granule	116	-0.576562	-1.44442	0.0173244	0.426863	0.411891	2177	tags=35%, list=17%, signal=30%	RAB5C/VAPA/CPPED1/NCSTN/SNAP29/PYCARD/DSN1/GM2A/CTSA/DNAJC5/GNS/RAP1B/C3/SYNGR1/FRK/VAT1/ARSA/NPC2/CEACAM6/CYB5R3/ARSB/ACTR2/LAMP1/PIGR/GAA/HEXB/BRI3/GRN/B4GALT1/LAMP2/CD63/GLIPR1/PRCP/CTSC/RNASET2/AGA/PSAP/GLB1/PRDX6/ANXA2/LYZ
CC	GO:0098978	glutamatergic synapse	272	-0.502324	-1.3914	0.0173869	0.426863	0.411891	1524	tags=17%, list=12%, signal=15%	ERC2/LGI1/DTNBP1/RGS9/NDRG1/PCDH17/PACSIN2/ADCY8/PRKAR1B/DLGAP4/SLC1A6/DLGAP3/DLGAP1/GPM6A/CPLX1/CADPS/P2RY1/CSPG5/RGS14/GRID2/NRP2/DRD2/ABR/WNT5A/GRIK2/ATP2B1/SLITRK2/PTPRO/SNAP25/CBLN1/DRP2/HOMER2/LRRC4B/CLSTN1/PRKAR2B/PPP1R1B/GABRR1/ARHGAP22/PTPRS/SHISA9/CNIH2/PCLO/ITGB3/APOE/ABHD6/GRIN2C
BP	GO:0042274	ribosomal small subunit biogenesis	68	0.740191	1.7519	0.017438	0.426863	0.411891	1203	tags=26%, list=9%, signal=24%	RPS21/RPS19/RPS16/RPS8/RPS14/RPS6/RPSA/RPS25/RPS15/RPS7/RPS17/UTP20/HEATR1/RPS5/RPS28/RPS10/RCL1/RPS24
BP	GO:0021952	central nervous system projection neuron axonogenesis	23	0.786346	1.56998	0.0175561	0.426863	0.411891	627	tags=22%, list=5%, signal=21%	SLIT2/EPHB1/SZT2/MYCBP2/CHRNB2
BP	GO:0010907	positive regulation of glucose metabolic process	32	0.769795	1.65099	0.017825	0.426863	0.411891	5	tags=6%, list=0%, signal=6%	GCG/INS
CC	GO:0034364	high-density lipoprotein particle	16	-0.817407	-1.53635	0.0178391	0.426863	0.411891	311	tags=56%, list=2%, signal=55%	APOH/APOA1/APOB/PLTP/LCAT/SAA1/CLU/APOE/APOA4
BP	GO:0072594	establishment of protein localization to organelle	477	0.483683	1.37301	0.017851	0.426863	0.411891	1460	tags=21%, list=11%, signal=20%	FZD5/RPLP0/RPL37/RYR2/CACNG5/TRIM28/RPS11/RPL21/RPS21/RPS19/RPS9/RPS27A/RPS16/RPS20/RPS23/RPL28/RPL13/RPL13A/RPS26/RPS13/RPL12/PPP1R10/RPL11/RPS2/RPL14/VPS13D/RPL23/IPO5/RPS8/RPL31/RPL27A/RPS3/RPL7A/RPS14/RPL10A/RPS6/RPL15/RPL30/VPS13A/RPS12/CROT/RPSA/RPL8/RPS25/RPS15/RPL39/RPL29/LRRK2/RPL4/RPL9/RPL35/RPL37A/DDIT3/RPL10/RPS15A/RPS7/HSP90AB1/RPL3/RPL26/RPS4X/RPL23A/RPS17/RPL18A/RPL6/UBA52/CCT2/RAB…
MF	GO:0016209	antioxidant activity	51	-0.723148	-1.64085	0.0178616	0.426863	0.411891	1456	tags=27%, list=11%, signal=24%	GPX1/MGST3/GPX5/CYGB/GPX4/PRDX4/PRDX5/HBZ/TXN/PRDX6/TPO/HBE1/APOE/APOA4
BP	GO:0071287	cellular response to manganese ion	10	0.893768	1.57664	0.0178708	0.426863	0.411891	935	tags=40%, list=7%, signal=37%	TH/EIF2AK3/LRRK2/EIF2S1
CC	GO:0045211	postsynaptic membrane	232	-0.526131	-1.43484	0.0178937	0.426863	0.411891	954	tags=16%, list=8%, signal=15%	GRIK4/GABRR2/P2RY1/CSPG5/PRRT2/LZTS1/SIGMAR1/GRID2/NRP2/GABRB1/DRD2/SSPN/SYAP1/KCTD12/GRIN1/GRIK2/SLITRK2/CBLN1/LRRC4B/CHRNA9/GRM7/CLSTN1/GRIA2/GABRR1/PTPRS/SHISA9/CNIH2/GABRG3/DMD/GABRD/ITGB3/SLITRK3/IGSF21/SLC30A1/ABHD6/GRIN2C
MF	GO:0016004	phospholipase activator activity	10	-0.878575	-1.54622	0.0179586	0.426863	0.411891	55	tags=20%, list=0%, signal=20%	GM2A/CCL3
BP	GO:1902036	regulation of hematopoietic stem cell differentiation	67	-0.680432	-1.5963	0.0180799	0.426863	0.411891	991	tags=15%, list=8%, signal=14%	TAL1/GATA2/PSMB6/MYB/PSMB9/PSMB7/PSME2/PSMB8/RUNX1/OCIAD2
BP	GO:0050848	regulation of calcium-mediated signaling	51	-0.720298	-1.63438	0.0181302	0.426863	0.411891	1176	tags=31%, list=9%, signal=29%	SLC8A2/EFHB/SLC9A1/CMKLR1/CDH13/PLEK/CHP1/HOMER2/GPR143/ZAP70/NEUROD2/ADA/SYK/CHP2/CD3E/CCL3
BP	GO:0071222	cellular response to lipopolysaccharide	116	-0.568934	-1.42531	0.0181302	0.426863	0.411891	1347	tags=16%, list=11%, signal=15%	DAB2IP/CXCL8/ICAM1/CXCL2/SIRPA/CD55/XBP1/HAVCR2/WNT5A/IL36G/CD6/CXCL10/SIGIRR/ASS1/CD274/IRF8/CCL3/TNFRSF1B/HAMP
BP	GO:0031669	cellular response to nutrient levels	169	0.569639	1.49455	0.0182089	0.426863	0.411891	1076	tags=15%, list=8%, signal=14%	AOC1/FOLR2/CYP24A1/ATF3/CLEC16A/MIOS/CYP27B1/GCN1/SZT2/EIF2AK3/PHEX/HMOX1/NUAK1/SEH1L/NCOA1/PPM1D/LRRK2/SLC38A3/SIK1/RPTOR/HSPA8/EIF2S1/INHBB/ULK1/CPEB4/PRKAG2
BP	GO:0090276	regulation of peptide hormone secretion	169	0.567934	1.49008	0.0182089	0.426863	0.411891	1116	tags=12%, list=9%, signal=11%	GCG/INS/CFTR/PDX1/CACNA1C/ISL1/RFX6/NEUROD1/SLC16A1/STXBP5L/NR0B2/KCNC2/PASK/SSTR5/NR1D1/FAM3D/INHBB/CPT1A/HIF1A/ANO1/CHD7
MF	GO:0008409	5'-3' exonuclease activity	15	-0.862482	-1.60773	0.0182558	0.426863	0.411891	14	tags=13%, list=0%, signal=13%	POLQ/DCLRE1A
BP	GO:0018342	protein prenylation	11	-0.857407	-1.54191	0.018276	0.426863	0.411891	177	tags=27%, list=1%, signal=27%	FNTA/FNTB/AIPL1
BP	GO:0097354	prenylation	11	-0.857407	-1.54191	0.018276	0.426863	0.411891	177	tags=27%, list=1%, signal=27%	FNTA/FNTB/AIPL1
BP	GO:0045453	bone resorption	50	-0.725587	-1.63664	0.0182944	0.426863	0.411891	1568	tags=34%, list=12%, signal=30%	LRRK1/ATP6AP1/CD38/TNFRSF11B/CSK/ADAM8/TFRC/RAC2/SIGLEC15/TMEM119/SYK/CALCA/CA2/INPP5D/ITGB3/CSF1R/HAMP
BP	GO:0045058	T cell selection	32	-0.742656	-1.54779	0.0182984	0.426863	0.411891	494	tags=28%, list=4%, signal=27%	LOXL3/SLAMF6/LY9/ZAP70/PTPRC/SYK/CD3E/CCR7/CD3D
BP	GO:0044344	cellular response to fibroblast growth factor stimulus	116	0.606369	1.5276	0.0183228	0.426863	0.411891	1063	tags=13%, list=8%, signal=12%	KLB/FLRT3/NR4A1/FGFR2/SPRY4/GALNT3/RBFOX2/ANOS1/FGF5/SULF1/CPS1/KIF16B/CD44/FGF7/FGF18
BP	GO:0050921	positive regulation of chemotaxis	106	-0.57646	-1.43921	0.018333	0.426863	0.411891	1344	tags=22%, list=11%, signal=20%	P2RY12/PRSS56/CXCL8/MOSPD2/CCR4/THBS1/CMKLR1/CDH13/TIRAP/RAC2/WNT5A/CCR1/DSCAM/C5AR1/SWAP70/CXCL10/LGMN/CSF1/NCKAP1L/AIF1/CCR7/CCL3/CSF1R
BP	GO:0045619	regulation of lymphocyte differentiation	117	-0.599526	-1.50572	0.0183988	0.427049	0.41207	1278	tags=26%, list=10%, signal=23%	BCL6/INHBA/CD27/TESPA1/FCRL3/LOXL3/FANCD2/SMAD7/ADAM8/CRTAM/SLAMF8/XBP1/NRARP/CD2/HLA-G/MYB/RHOH/SLC46A2/ZAP70/PTPRC/RUNX3/IRF1/PGLYRP2/ADA/SYK/TLR9/SASH3/INPP5D/NCKAP1L/RUNX1
BP	GO:0046700	heterocycle catabolic process	487	0.488235	1.3836	0.0184851	0.427708	0.412705	1291	tags=22%, list=10%, signal=21%	PABPC4/IGF2BP1/DPEP1/IGF2BP2/RPLP0/RPL37/PDE8B/HELZ2/RPS11/RPL21/ACOT7/RPS21/RPS19/RPS9/RPS27A/RPS16/RPS20/RPS23/RPL28/RPL13/RPL13A/RPS26/RPS13/RPL12/FASTKD5/RPL11/RPS2/HMOX1/RPL14/SMG7/PDE9A/RPL23/CSDC2/RPS8/RPL31/NBAS/RPL27A/RPS3/CSDE1/DNASE2B/RPL7A/RPS14/RPL10A/RPS6/RPL15/PDE7B/RPL30/RPS12/RPSA/HSPB1/RPL8/RBM24/RPS25/RPS15/RPL39/RPL29/RPL4/RPL9/RPL35/RPL37A/AGO4/RPL10/RPS15A/RPS7/AXIN2/RPL3/RP…
BP	GO:0042102	positive regulation of T cell proliferation	51	-0.71808	-1.62935	0.0186674	0.430006	0.414923	1144	tags=37%, list=9%, signal=34%	TMIGD2/EBI3/CD55/HLA-A/TFRC/HAVCR2/HLA-DPA1/CD6/CD276/ZAP70/PTPRC/SYK/TNFSF13B/SASH3/HLA-DPB1/NCKAP1L/AIF1/CD3E/CD274
BP	GO:0050866	negative regulation of cell activation	127	-0.57834	-1.47723	0.018701	0.430006	0.414923	1278	tags=23%, list=10%, signal=21%	BCL6/INHBA/PARP3/TYRO3/DUSP3/GRN/LOXL3/SAMSN1/SMAD7/CRTAM/CNR2/NRARP/CD200/HAVCR2/BLK/HLA-G/TIGIT/PTPRC/RUNX3/IRF1/PGLYRP2/LRRC32/CD84/INPP5D/TWSG1/CD274/APOE/RUNX1/CLNK
BP	GO:0097237	cellular response to toxic substance	76	-0.632676	-1.5148	0.0187705	0.430073	0.414988	1306	tags=20%, list=10%, signal=18%	GPX1/MGST3/GPX5/CYGB/GPX4/FANCC/PRDX4/PRDX5/HBZ/TXN/PRDX6/TPO/HBE1/APOE/APOA4
BP	GO:0045577	regulation of B cell differentiation	23	-0.78443	-1.56979	0.0188471	0.430073	0.414988	1273	tags=39%, list=10%, signal=35%	INHBA/CD27/FCRL3/SLAMF8/XBP1/SYK/TLR9/INPP5D/NCKAP1L
CC	GO:0035770	ribonucleoprotein granule	197	0.559722	1.49613	0.018985	0.430073	0.414988	2089	tags=25%, list=16%, signal=22%	PABPC4/IGF2BP1/HENMT1/MOV10L1/RPLP0/UBAP2L/ACTB/RPL28/ASZ1/FASTKD5/CSDE1/RPS6/AGO4/RPS4X/RPTOR/RPL6/EIF2S1/PABPC1/UPF1/MOV10/DDX28/CAPRIN1/DDX1/DHX9/WTIP/GIGYF2/PRRC2C/PUM1/DDX19B/TDRD9/EIF4G1/HSF1/PIWIL1/TNRC6A/MAPT/EXD1/TDRD5/NOCT/CIRBP/ARNTL/CTSG/LIMD1/ZC3H12A/CNOT2/ZFP36L1/NYNRIN/TDRD6/RC3H2/PRKAA2/TRIM25
BP	GO:0035107	appendage morphogenesis	117	0.659924	1.66177	0.0189952	0.430073	0.414988	1727	tags=26%, list=14%, signal=23%	TBC1D32/WNT7A/DYNC2H1/CACNA1C/HAND2/FREM2/FGFR2/LRP6/MYH3/TBX2/ROR2/MEGF8/CREBBP/C2CD3/SEMA3C/FMN1/TGFB2/NOTCH1/COL2A1/NOTCH2/CHD7/PTCH1/GREM1/GNAS/FGF4/FRAS1/HOXA10/LEF1/FBN2/LRP5/IQCE
BP	GO:0035108	limb morphogenesis	117	0.659924	1.66177	0.0189952	0.430073	0.414988	1727	tags=26%, list=14%, signal=23%	TBC1D32/WNT7A/DYNC2H1/CACNA1C/HAND2/FREM2/FGFR2/LRP6/MYH3/TBX2/ROR2/MEGF8/CREBBP/C2CD3/SEMA3C/FMN1/TGFB2/NOTCH1/COL2A1/NOTCH2/CHD7/PTCH1/GREM1/GNAS/FGF4/FRAS1/HOXA10/LEF1/FBN2/LRP5/IQCE
BP	GO:0035590	purinergic nucleotide receptor signaling pathway	27	-0.766859	-1.55844	0.0191534	0.431845	0.416698	879	tags=30%, list=7%, signal=28%	P2RY12/P2RY1/ADORA3/P2RY6/P2RY8/ADA/P2RY11/ADCY5
BP	GO:0009617	response to bacterium	341	-0.487483	-1.37446	0.0191905	0.431845	0.416698	1687	tags=23%, list=13%, signal=21%	LRG1/S100A14/C4B/CASP1/SIRT2/NFKBIL1/VIM/PGLYRP1/COCH/RPS6KB1/AKAP12/GPX1/RNF5/IGLL1/SRR/DAB2IP/TUSC2/CXCL8/TMEM229B/ICAM1/TLR3/LTA/CITED1/CCR4/CXCL2/MR1/SIRPA/GPM6A/MLH1/GRN/CD55/AQP1/C4BPA/SNCA/TBK1/HLA-A/SLAMF8/XBP1/TIRAP/CNR2/CYBA/SLC22A5/PTGIR/HAVCR2/WNT5A/PLA2G1B/B2M/SELP/IL17F/RGS1/CYP1A1/TLR1/C5AR1/LYG2/IL36G/CRP/CD6/CXCL10/SIGIRR/PGLYRP2/IFNAR1/SYK/TLR9/GZMA/FASLG/CFP/ASS1/PTGER4/LYZ/CCR…
BP	GO:1905515	non-motile cilium assembly	46	0.697816	1.54245	0.019363	0.433181	0.417987	608	tags=15%, list=5%, signal=15%	TBC1D32/DYNC2H1/CEP250/CEP135/PCM1/C2CD3/VANGL2
BP	GO:0002573	myeloid leukocyte differentiation	147	-0.594843	-1.54577	0.019449	0.433181	0.417987	997	tags=17%, list=8%, signal=16%	JAGN1/TAL1/MAFB/NRROS/CEBPA/GATA2/RB1/FASN/TFRC/SIGLEC15/MED1/PIK3CD/ZBTB46/CCR1/ANXA2/CA2/INPP5D/CSF1/C1QC/SPI1/CCR7/CCL3/CSF1R/RUNX1/PIR
BP	GO:0031294	lymphocyte costimulation	35	-0.744912	-1.57011	0.0194952	0.433181	0.417987	411	tags=20%, list=3%, signal=19%	TMIGD2/CSK/VAV1/TNFSF13B/CD3E/CCR7/CD274
BP	GO:0031295	T cell costimulation	35	-0.744912	-1.57011	0.0194952	0.433181	0.417987	411	tags=20%, list=3%, signal=19%	TMIGD2/CSK/VAV1/TNFSF13B/CD3E/CCR7/CD274
CC	GO:0034703	cation channel complex	167	-0.543062	-1.4328	0.0195433	0.433181	0.417987	1122	tags=20%, list=9%, signal=19%	CACNG3/KCNS3/CASQ2/KCNF1/KCNIP1/CNGB1/ORAI1/UNC80/KCNB2/DLG2/OLFM2/FKBP1B/CACNA1S/AMIGO1/KCNAB2/LRRC52/MICU1/GRIK4/MICU2/KCNIP3/CTTN/SCN8A/GRIN1/GRIK2/SNAP25/KCNIP2/GRIA2/PKD1/SHISA9/CNIH2/CACNA2D3/KCNJ2/ABHD6/GRIN2C
CC	GO:0042588	zymogen granule	10	0.890036	1.57006	0.0197685	0.435391	0.42012	111	tags=10%, list=1%, signal=10%	CUZD1
MF	GO:0045182	translation regulator activity	113	0.658431	1.65161	0.0198256	0.435391	0.42012	1115	tags=21%, list=9%, signal=20%	IGF2BP1/IGF2BP2/EIF3H/GCN1/EIF3C/EEF1B2/RPS9/EIF2AK3/EIF3B/RPS14/EIF3A/RPL10/EIF2S3/NEURL1/TUFM/EEF1G/IGF2BP3/EIF2A/EIF2S1/PABPC1/EEF1D/RPL22/CPEB4/EIF4A1
MF	GO:0038187	pattern recognition receptor activity	14	-0.844886	-1.5465	0.0198399	0.435391	0.42012	372	tags=43%, list=3%, signal=42%	CLEC4E/PGLYRP1/TLR7/PGLYRP2/TLR9/MARCO
BP	GO:0001774	microglial cell activation	31	-0.733751	-1.52346	0.019879	0.435391	0.42012	1385	tags=45%, list=11%, signal=40%	CST7/TLR3/GRN/SNCA/CTSC/TLR1/C5AR1/TLR7/CLU/PTPRC/ITGB2/C1QA/AIF1/CCL3
BP	GO:0046883	regulation of hormone secretion	211	0.563176	1.51128	0.0200488	0.437069	0.421738	1053	tags=11%, list=8%, signal=10%	GCG/INS/NMB/CFTR/SCG5/PDX1/CACNA1C/ISL1/RFX6/NEUROD1/SLC16A1/STXBP5L/NR0B2/KCNC2/PASK/CREB1/SSTR5/NR1D1/FAM3D/INHBB/CPT1A/HIF1A/ANO1
BP	GO:0034655	nucleobase-containing compound catabolic process	460	0.49384	1.39507	0.0201852	0.437069	0.421738	1254	tags=22%, list=10%, signal=21%	PABPC4/IGF2BP1/IGF2BP2/RPLP0/RPL37/PDE8B/HELZ2/RPS11/RPL21/ACOT7/RPS21/RPS19/RPS9/RPS27A/RPS16/RPS20/RPS23/RPL28/RPL13/RPL13A/RPS26/RPS13/RPL12/FASTKD5/RPL11/RPS2/RPL14/SMG7/PDE9A/RPL23/CSDC2/RPS8/RPL31/NBAS/RPL27A/RPS3/CSDE1/DNASE2B/RPL7A/RPS14/RPL10A/RPS6/RPL15/PDE7B/RPL30/RPS12/RPSA/HSPB1/RPL8/RBM24/RPS25/RPS15/RPL39/RPL29/RPL4/RPL9/RPL35/RPL37A/AGO4/RPL10/RPS15A/RPS7/AXIN2/RPL3/RPL26/RPS4X/RP…
BP	GO:0050805	negative regulation of synaptic transmission	55	-0.648444	-1.48296	0.0202426	0.437069	0.421738	1478	tags=24%, list=12%, signal=21%	CD38/SLC24A2/CELF4/PCDH17/GNAI1/ADCY8/CNR2/GRID2/DRD2/GRIK2/CBLN1/SLC30A1/ABHD6
BP	GO:0006111	regulation of gluconeogenesis	36	0.743086	1.62269	0.0202465	0.437069	0.421738	734	tags=17%, list=6%, signal=16%	GCG/INS/FAM3C/SIRT7/PPARGC1A/SIK1
BP	GO:0030888	regulation of B cell proliferation	46	-0.684868	-1.52315	0.020265	0.437069	0.421738	1478	tags=33%, list=12%, signal=29%	CD38/MIF/GPR183/BCL6/FCRL3/TIRAP/TFRC/BLK/PTPRC/ADA/TLR9/TNFSF13B/SASH3/INPP5D/NCKAP1L
BP	GO:0031062	positive regulation of histone methylation	30	0.766733	1.62581	0.0203599	0.437069	0.421738	957	tags=17%, list=8%, signal=15%	GCG/KMT2A/KMT2E/RIF1/PRDM9
BP	GO:0055010	ventricular cardiac muscle tissue morphogenesis	38	0.720738	1.58963	0.0204152	0.437069	0.421738	884	tags=29%, list=7%, signal=27%	LRP2/TGFBR1/DSP/ISL1/MYBPC3/RYR2/FGFR2/TNNC1/TGFB2/NOTCH1/PROX1
BP	GO:0046579	positive regulation of Ras protein signal transduction	60	-0.650799	-1.51043	0.0204626	0.437069	0.421738	1346	tags=21%, list=11%, signal=19%	ARHGEF3/RTN4R/KRAS/F2RL2/GPR174/ROBO1/RASGRP1/VAV1/P2RY8/NET1/CSF1/EPOR/GPR18
BP	GO:0010972	negative regulation of G2/M transition of mitotic cell cycle	86	-0.599382	-1.45329	0.0204885	0.437069	0.421738	1116	tags=15%, list=9%, signal=14%	BRSK1/CDC6/PSMB6/DONSON/AURKA/AURKB/VPS4A/ORC1/PSMB9/PSMB7/GPR132/PSME2/PSMB8
BP	GO:0002455	humoral immune response mediated by circulating immunoglobulin	32	-0.725962	-1.513	0.0206406	0.439044	0.423644	1808	tags=47%, list=14%, signal=40%	C3/C4B/C8A/C7/IGLL1/LTA/CD55/C4BPA/CRP/CFI/CLU/PTPRC/SERPING1/C1QA/C1QC
BP	GO:1900076	regulation of cellular response to insulin stimulus	57	0.7305	1.66955	0.0207598	0.440295	0.424851	37	tags=4%, list=0%, signal=4%	INS/TNS2
BP	GO:0097202	activation of cysteine-type endopeptidase activity	12	-0.865566	-1.56757	0.0208187	0.440295	0.424851	777	tags=33%, list=6%, signal=31%	CIDEB/PERP/LGMN/CYFIP2
BP	GO:0060977	coronary vasculature morphogenesis	15	0.849708	1.60596	0.020879	0.440308	0.424864	146	tags=20%, list=1%, signal=20%	LRP2/TGFBR1/HAND2
BP	GO:0031076	embryonic camera-type eye development	28	0.776451	1.62784	0.0213087	0.445874	0.430234	884	tags=21%, list=7%, signal=20%	FZD5/TH/LRP6/TBX2/STRA6/PROX1
BP	GO:0046326	positive regulation of glucose import	28	0.776133	1.62717	0.0213087	0.445874	0.430234	5	tags=4%, list=0%, signal=4%	INS
BP	GO:0071621	granulocyte chemotaxis	74	-0.630506	-1.50943	0.0213528	0.445874	0.430234	1327	tags=32%, list=10%, signal=29%	PIP5K1C/CXCL8/MOSPD2/CXCL2/THBS1/CMKLR1/CKLF/TIRAP/RAC2/PLA2G1B/PIK3CD/C5AR1/VAV1/CXCL10/SAA1/CSF3R/PREX1/SYK/ITGB2/CSF1/NCKAP1L/CCR7/CCL3/CSF1R
MF	GO:0048038	quinone binding	14	0.860003	1.60924	0.0213942	0.445874	0.430234	436	tags=14%, list=3%, signal=14%	AOC1/COQ10B
BP	GO:0003231	cardiac ventricle development	97	0.629634	1.54261	0.0214449	0.445874	0.430234	1360	tags=26%, list=11%, signal=23%	LRP2/TGFBR1/HAND2/DSP/ISL1/SLIT2/MYBPC3/RYR2/FGFR2/STRA6/TNNC1/WNT11/KCNK2/SEMA3C/TGFB2/NOTCH1/PDE2A/PROX1/HIF1A/ZFPM1/CHD7/NPY2R/SLIT3/HAND1/TRIP11
BP	GO:0002479	antigen processing and presentation of exogenous peptide antigen via MHC class I, TAP-dependent	64	-0.639434	-1.50102	0.0216998	0.449905	0.434125	822	tags=30%, list=6%, signal=28%	PSMA6/PSMD10/PDIA3/PSMD9/TAP1/VAMP3/PSMA8/NCF1/TAP2/PSMB6/HLA-A/CYBA/B2M/HLA-G/FCGR1A/PSMB9/PSMB7/PSME2/PSMB8
BP	GO:0002695	negative regulation of leukocyte activation	112	-0.580187	-1.45012	0.0218177	0.450379	0.434581	1278	tags=25%, list=10%, signal=23%	BCL6/INHBA/PARP3/TYRO3/DUSP3/GRN/LOXL3/SAMSN1/SMAD7/CRTAM/CNR2/NRARP/CD200/HAVCR2/BLK/HLA-G/TIGIT/PTPRC/RUNX3/IRF1/PGLYRP2/LRRC32/CD84/INPP5D/TWSG1/CD274/RUNX1/CLNK
BP	GO:0033500	carbohydrate homeostasis	177	0.583318	1.54124	0.0219057	0.450379	0.434581	823	tags=11%, list=6%, signal=10%	GCG/INS/NMB/CFTR/PAX6/PDX1/TH/RFX6/CRTC2/NEUROD1/CSRP3/SLC16A1/STXBP5L/RPS6/PPARGC1A/SLC39A14/ADIPOR2/VGF/SSTR5
BP	GO:0042593	glucose homeostasis	177	0.583318	1.54124	0.0219057	0.450379	0.434581	823	tags=11%, list=6%, signal=10%	GCG/INS/NMB/CFTR/PAX6/PDX1/TH/RFX6/CRTC2/NEUROD1/CSRP3/SLC16A1/STXBP5L/RPS6/PPARGC1A/SLC39A14/ADIPOR2/VGF/SSTR5
CC	GO:0000159	protein phosphatase type 2A complex	16	0.833081	1.58491	0.0221586	0.450798	0.434986	606	tags=19%, list=5%, signal=18%	PPP2R3A/NKD1/PPP2R2B
BP	GO:0098810	neurotransmitter reuptake	27	-0.759704	-1.5439	0.0221697	0.450798	0.434986	1091	tags=37%, list=9%, signal=34%	PER2/SNCA/DRD2/SLC29A2/TOR1A/SLC18A1/GDNF/ITGB3/SLC29A1/SLC18A2
BP	GO:0030326	embryonic limb morphogenesis	100	0.662745	1.63192	0.0221704	0.450798	0.434986	1708	tags=26%, list=13%, signal=23%	TBC1D32/WNT7A/DYNC2H1/CACNA1C/HAND2/FREM2/LRP6/MYH3/TBX2/ROR2/MEGF8/CREBBP/C2CD3/TGFB2/NOTCH1/NOTCH2/CHD7/PTCH1/GREM1/GNAS/FGF4/FRAS1/HOXA10/LEF1/FBN2/LRP5
BP	GO:0035113	embryonic appendage morphogenesis	100	0.662745	1.63192	0.0221704	0.450798	0.434986	1708	tags=26%, list=13%, signal=23%	TBC1D32/WNT7A/DYNC2H1/CACNA1C/HAND2/FREM2/LRP6/MYH3/TBX2/ROR2/MEGF8/CREBBP/C2CD3/TGFB2/NOTCH1/NOTCH2/CHD7/PTCH1/GREM1/GNAS/FGF4/FRAS1/HOXA10/LEF1/FBN2/LRP5
BP	GO:0071677	positive regulation of mononuclear cell migration	40	-0.705353	-1.52203	0.022273	0.450798	0.434986	881	tags=22%, list=7%, signal=21%	MOSPD2/ADAM8/WNT5A/CCR1/CXCL10/LGMN/AIF1/CCR7/CCL3
CC	GO:0036464	cytoplasmic ribonucleoprotein granule	187	0.554745	1.47174	0.0222926	0.450798	0.434986	2089	tags=25%, list=16%, signal=21%	PABPC4/IGF2BP1/HENMT1/MOV10L1/RPLP0/UBAP2L/ACTB/RPL28/ASZ1/CSDE1/RPS6/AGO4/RPS4X/RPTOR/RPL6/EIF2S1/PABPC1/UPF1/MOV10/CAPRIN1/DDX1/DHX9/WTIP/GIGYF2/PRRC2C/PUM1/DDX19B/TDRD9/EIF4G1/PIWIL1/TNRC6A/MAPT/EXD1/TDRD5/NOCT/CIRBP/ARNTL/CTSG/LIMD1/ZC3H12A/CNOT2/ZFP36L1/NYNRIN/TDRD6/RC3H2/PRKAA2/TRIM25
BP	GO:0032743	positive regulation of interleukin-2 production	22	-0.771059	-1.53577	0.0224267	0.452271	0.436407	568	tags=27%, list=4%, signal=26%	PRKCQ/TRAF2/PTPRC/SASH3/CD3E/RUNX1
MF	GO:0016684	oxidoreductase activity, acting on peroxide as acceptor	37	-0.71716	-1.5179	0.022716	0.453255	0.437356	1456	tags=32%, list=11%, signal=29%	GPX1/SESN3/MGST3/GPX5/CYGB/GPX4/PRDX4/PRDX5/HBZ/PRDX6/TPO/HBE1
BP	GO:0050671	positive regulation of lymphocyte proliferation	78	-0.675916	-1.62319	0.022796	0.453255	0.437356	1548	tags=37%, list=12%, signal=33%	IL6ST/CD38/MIF/PRKCQ/GPR183/BCL6/TMIGD2/FCRL3/EBI3/CD55/HLA-A/TIRAP/TFRC/HAVCR2/HLA-DPA1/CD6/CD276/ZAP70/PTPRC/ADA/SYK/TLR9/TNFSF13B/SASH3/HLA-DPB1/NCKAP1L/AIF1/CD3E/CD274
CC	GO:0034361	very-low-density lipoprotein particle	11	-0.848979	-1.52675	0.0228095	0.453255	0.437356	702	tags=55%, list=6%, signal=52%	APOH/APOA1/APOB/PCYOX1/APOE/APOA4
CC	GO:0034385	triglyceride-rich plasma lipoprotein particle	11	-0.848979	-1.52675	0.0228095	0.453255	0.437356	702	tags=55%, list=6%, signal=52%	APOH/APOA1/APOB/PCYOX1/APOE/APOA4
MF	GO:0008266	poly(U) RNA binding	19	0.838223	1.62435	0.0228651	0.453255	0.437356	953	tags=21%, list=7%, signal=20%	PABPC4/RBMS2/RPS7/PABPC1
BP	GO:0050818	regulation of coagulation	60	-0.645268	-1.49759	0.0229018	0.453255	0.437356	1114	tags=30%, list=9%, signal=28%	KNG1/EDN1/PDGFB/NFE2L2/FGG/VTN/THBS1/PROC/CPB2/DMTN/TSPAN8/PLAUR/GP1BA/ADTRP/PLAU/SERPING1/APOE/F11
MF	GO:0071617	lysophospholipid acyltransferase activity	17	-0.816246	-1.56404	0.0230051	0.453255	0.437356	520	tags=24%, list=4%, signal=23%	AGPAT5/LPCAT2/GPAT3/AGPAT4
BP	GO:0060333	interferon-gamma-mediated signaling pathway	53	-0.664154	-1.50611	0.0230062	0.453255	0.437356	1238	tags=25%, list=10%, signal=22%	ICAM1/NCAM1/CAMK2B/CIITA/HLA-A/MED1/B2M/HLA-G/HLA-DPA1/FCGR1A/IRF1/HLA-DPB1/IRF8
CC	GO:0042788	polysomal ribosome	29	0.773153	1.62953	0.0230281	0.453255	0.437356	1431	tags=76%, list=11%, signal=67%	EIF3H/RPS21/RPS23/RPS26/RPL11/RPL31/RPL7A/RPL10A/RPL30/RPL8/RPL39/RPL18A/RPL6/BTF3/RPL24/RPL36A/RPS28/RPL36/RPS29/RPL18/DHX9/RPL32
BP	GO:0060670	branching involved in labyrinthine layer morphogenesis	11	0.86673	1.54495	0.0231986	0.454584	0.438639	708	tags=27%, list=6%, signal=26%	FZD5/FGFR2/IL10
BP	GO:0006302	double-strand break repair	205	-0.504081	-1.35614	0.0232571	0.454584	0.438639	2068	tags=19%, list=16%, signal=16%	SMARCAD1/MDC1/RMI2/PPP4C/SAMHD1/MCM6/MCM5/WDR70/CIB1/RBBP8/RAD51/MCM3/GINS4/BABAM1/BRCA2/AUNIP/DEK/MCM2/ACTR2/ZFYVE26/RAD54L/POLQ/PARP3/ESCO2/FOXM1/MCM4/SMC5/MLH1/DNTT/ACTR8/FANCD2/DMC1/MGMT/ZSWIM7/WAS/RAD51AP1/GEN1/SWI5/DCLRE1A
BP	GO:0048148	behavioral response to cocaine	10	-0.870015	-1.53115	0.023332	0.454584	0.438639	706	tags=40%, list=6%, signal=38%	DRD2/SDK1/HOMER2/PPP1R1B
BP	GO:0051250	negative regulation of lymphocyte activation	93	-0.602103	-1.4768	0.023342	0.454584	0.438639	1278	tags=25%, list=10%, signal=22%	BCL6/INHBA/PARP3/TYRO3/DUSP3/LOXL3/SAMSN1/SMAD7/CRTAM/NRARP/HAVCR2/BLK/HLA-G/TIGIT/RUNX3/IRF1/PGLYRP2/LRRC32/INPP5D/TWSG1/CD274/RUNX1/CLNK
BP	GO:0038093	Fc receptor signaling pathway	155	-0.53055	-1.38568	0.0234275	0.455049	0.439087	1358	tags=15%, list=11%, signal=14%	PRKCQ/ACTR2/PIGR/ABI1/ELMO1/PPP3R1/CD200R1/TEC/TEC/PSMB6/ARPC1B/FCGR1A/VAV1/PSMB9/PSMB7/PTPRC/WAS/SYK/PSME2/LCP2/CYFIP2/PSMB8/NCKAP1L/ITK
BP	GO:0034367	protein-containing complex remodeling	23	-0.771912	-1.54474	0.0235223	0.455346	0.439375	52	tags=26%, list=0%, signal=26%	APOA1/APOB/PLTP/LCAT/APOE/APOA4
BP	GO:0000462	maturation of SSU-rRNA from tricistronic rRNA transcript (SSU-rRNA, 5.8S rRNA, LSU-rRNA)	34	0.718209	1.56451	0.0235662	0.455346	0.439375	1046	tags=24%, list=8%, signal=22%	RPS21/RPS19/RPS16/RPS8/RPS14/UTP20/HEATR1/RCL1
BP	GO:0034612	response to tumor necrosis factor	214	-0.51639	-1.3955	0.023672	0.456039	0.440043	1881	tags=20%, list=15%, signal=17%	ADAMTS7/SMPD3/PSMA8/EDN1/GBA/APOB/SPPL2A/CIB1/NFE2L2/CASP1/RPS6KB1/AKAP12/DAB2IP/TNFRSF11B/TAX1BP1/CD27/CXCL8/ICAM1/LTA/THBS1/ARHGEF2/CDIP1/CEBPA/PLVAP/PSMB6/TANK/CARD14/NPNT/RBCK1/TRAF2/HYAL3/PSMB9/PSMB7/SYK/CALCA/TNFSF13B/PSME2/ASS1/PSMB8/TNFSF12/CCL3/TNFRSF1B/HAMP
BP	GO:0060259	regulation of feeding behavior	18	0.840782	1.61427	0.0237256	0.456039	0.440043	176	tags=11%, list=1%, signal=11%	INS/SGIP1
BP	GO:0031146	SCF-dependent proteasomal ubiquitin-dependent protein catabolic process	79	-0.635273	-1.52374	0.0238325	0.456902	0.440876	1164	tags=22%, list=9%, signal=20%	PSMA6/CCNF/PSMD10/PSMD9/FBXO6/PSMA8/CUL4A/FBXL16/FBXL22/PSMB6/FBXO9/FBXO4/FBXL15/PSMB9/PSMB7/PSME2/PSMB8
MF	GO:0050750	low-density lipoprotein particle receptor binding	20	-0.783679	-1.54503	0.0239198	0.457388	0.441345	381	tags=25%, list=3%, signal=24%	DKK1/CRP/CLU/APOE/HSPG2
BP	GO:0071674	mononuclear cell migration	118	-0.611309	-1.53548	0.0239859	0.457468	0.441422	1771	tags=32%, list=14%, signal=28%	GBA/PDGFB/AKIRIN1/ITGAL/S100A14/CXCR4/ECM1/MSN/FUT7/GPR183/ICAM1/MOSPD2/THBS1/SIRPA/CD200R1/CMKLR1/ADAM8/CKLF/CRTAM/SLAMF8/CD200/WNT5A/PIK3CD/PTPRO/CCR1/ADTRP/C5AR1/CXCL10/ZAP70/SAA1/CALCA/LGMN/CSF1/CXCR3/AIF1/CCR7/CCL3/CSF1R
BP	GO:0060976	coronary vasculature development	39	0.717442	1.58206	0.0240839	0.457728	0.441673	2264	tags=41%, list=18%, signal=34%	LRP2/DYNC2H1/TGFBR1/HAND2/MEGF8/MMP21/NOTCH1/PLXND1/APLNR/SETD2/SRF/ZBTB14/AP2B1/BMP4/GPC3/PTK7
BP	GO:0046364	monosaccharide biosynthetic process	80	0.673645	1.62128	0.024125	0.457728	0.441673	812	tags=16%, list=6%, signal=15%	GCG/INS/PGAM2/ATF3/FAM3C/CRTC2/PC/SIRT7/PGK1/PPARGC1A/SLC39A14/SIK1/TKT
BP	GO:0050871	positive regulation of B cell activation	57	-0.6896	-1.59158	0.0241856	0.457728	0.441673	1478	tags=33%, list=12%, signal=30%	CD38/IGLL1/MIF/GPR183/BCL6/CD27/MLH1/FCRL3/XBP1/TIRAP/TFRC/PTPRC/ADA/SYK/TLR9/TNFSF13B/SASH3/INPP5D/NCKAP1L
BP	GO:0072503	cellular divalent inorganic cation homeostasis	338	-0.486231	-1.36987	0.0242852	0.458437	0.442357	1333	tags=18%, list=10%, signal=16%	CIB2/SLC1A1/STIM1/ANK2/CALB2/JPH3/ADCY8/TMBIM6/JPH1/SLC8A2/CCR4/BCAP31/FKBP1B/HEXB/CD55/MICU1/CMKLR1/MICU2/F2RL2/SNCA/P2RY1/GPR174/GATA2/PTGIR/DRD2/WNT5A/PLA2G1B/ATP2C1/XCR1/GRIN1/GRIK2/P2RY6/ATP2B1/CCR1/CHRNA9/KEL/C5AR1/SWAP70/PKD1/P2RY8/SLC24A4/SLC30A4/CXCL10/SAA1/ADCYAP1/PTPRC/GNG3/TMEM38A/CALCA/FASLG/ADCY5/CXCR3/DMD/PTGER4/CCR7/CCL3/APOE/SLC30A1/GPR18/GRIN2C
MF	GO:0015248	sterol transporter activity	29	-0.742546	-1.53491	0.0244408	0.45877	0.442679	52	tags=38%, list=0%, signal=38%	STAR/GRAMD1C/APOA1/GRAMD1B/APOB/PLTP/NPC2/STARD3/APOE/OSBP2/APOA4
CC	GO:0097038	perinuclear endoplasmic reticulum	17	-0.814373	-1.56045	0.0244893	0.45877	0.442679	1084	tags=35%, list=9%, signal=32%	BCAP31/MOGAT2/TRIM13/CLU/DGAT2/OSBP2
MF	GO:0120020	cholesterol transfer activity	17	-0.8136	-1.55897	0.0244893	0.45877	0.442679	2039	tags=59%, list=16%, signal=49%	STAR/GRAMD1C/APOA1/GRAMD1B/APOB/PLTP/NPC2/STARD3/APOE/APOA4
BP	GO:0048736	appendage development	144	0.606457	1.56948	0.0247134	0.45993	0.443798	1727	tags=23%, list=14%, signal=20%	TBC1D32/WNT7A/DYNC2H1/CACNA1C/HAND2/FREM2/FGFR2/LRP6/MYH3/TBX2/ROR2/MEGF8/KREMEN1/CREBBP/C2CD3/SEMA3C/FMN1/TGFB2/NOTCH1/COL2A1/NOTCH2/CHD7/NR2F2/PTCH1/GREM1/GNAS/FGF4/FRAS1/HOXA10/LEF1/FBN2/LRP5/IQCE
BP	GO:0060173	limb development	144	0.606457	1.56948	0.0247134	0.45993	0.443798	1727	tags=23%, list=14%, signal=20%	TBC1D32/WNT7A/DYNC2H1/CACNA1C/HAND2/FREM2/FGFR2/LRP6/MYH3/TBX2/ROR2/MEGF8/KREMEN1/CREBBP/C2CD3/SEMA3C/FMN1/TGFB2/NOTCH1/COL2A1/NOTCH2/CHD7/NR2F2/PTCH1/GREM1/GNAS/FGF4/FRAS1/HOXA10/LEF1/FBN2/LRP5/IQCE
BP	GO:0010827	regulation of glucose transmembrane transport	55	0.655963	1.49709	0.0247661	0.45993	0.443798	1081	tags=11%, list=9%, signal=10%	INS/CLIP3/ADIPOR2/NR4A3/PRKAG2/INSR
BP	GO:0007204	positive regulation of cytosolic calcium ion concentration	221	-0.514793	-1.399	0.0248005	0.45993	0.443798	1333	tags=20%, list=10%, signal=19%	CIB2/ANK2/JPH3/ADCY8/TMBIM6/JPH1/SLC8A2/CCR4/BCAP31/FKBP1B/CD55/CMKLR1/F2RL2/SNCA/P2RY1/GPR174/GATA2/PTGIR/DRD2/PLA2G1B/XCR1/GRIN1/P2RY6/CCR1/CHRNA9/C5AR1/SWAP70/PKD1/P2RY8/CXCL10/SAA1/ADCYAP1/PTPRC/GNG3/TMEM38A/CALCA/FASLG/ADCY5/CXCR3/DMD/PTGER4/CCR7/CCL3/GPR18/GRIN2C
BP	GO:1902624	positive regulation of neutrophil migration	21	-0.800979	-1.58549	0.0249346	0.461258	0.445079	1248	tags=48%, list=10%, signal=43%	LBP/EDN1/CXCL8/MOSPD2/ADAM8/TIRAP/RAC2/C5AR1/NCKAP1L/CCR7
BP	GO:1903707	negative regulation of hemopoiesis	65	-0.626785	-1.47709	0.0250247	0.461768	0.445572	1278	tags=26%, list=10%, signal=24%	BCL6/INHBA/TLR3/LOXL3/MAFB/SMAD7/GATA2/NRARP/HLA-G/ZBTB46/RUNX3/IRF1/PGLYRP2/INPP5D/C1QC/CCL3/RUNX1
BP	GO:0001822	kidney development	236	0.559698	1.523	0.0251567	0.463047	0.446805	1439	tags=19%, list=11%, signal=18%	TBC1D32/LRP2/TNS2/BMPER/ADAMTS1/DYNC2H1/TGFBR1/SLIT2/FREM2/FGFR2/MMP9/FOXJ1/MAGI2/STRA6/FOXD1/HSPB11/ASXL1/VANGL2/WNT11/LRRK2/SIX4/KCNJ8/POU3F3/SULF1/FMN1/TGFB2/NOTCH1/DLG5/PROX1/MPV17/ARID5B/LAMA5/CRLF1/ACTA2/MYC/NOTCH2/UMOD/PDGFRA/ACE/SEC61A1/PLXND1/PTCH1/HPGD/GREM1/LZTS2/SMO
BP	GO:0043388	positive regulation of DNA binding	41	0.714828	1.5791	0.0253599	0.46549	0.449163	654	tags=20%, list=5%, signal=19%	PAX6/PDX1/HAND2/ISL1/TRIM28/MMP9/NEUROD1/ITGA2
CC	GO:0043202	lysosomal lumen	84	-0.650299	-1.57501	0.025526	0.46549	0.449163	2000	tags=43%, list=16%, signal=36%	GPC6/DCN/GNS/CTSB/PLBD2/ARSA/GBA/GALC/APOB/BGN/PPT2/NPC2/NEU1/ARSB/SGSH/NAAA/GAA/HEXB/CSPG5/CTSD/MAN2B2/LAMP2/PRELP/GYG1/RNASET2/CTSS/IDS/PSAP/GLB1/TCN2/EPDR1/FASLG/LGMN/NCAN/CTSK/HSPG2
BP	GO:0050864	regulation of B cell activation	85	-0.618623	-1.49716	0.0255727	0.46549	0.449163	1478	tags=28%, list=12%, signal=25%	CD38/IGLL1/MIF/GPR183/BCL6/INHBA/CD27/PARP3/MLH1/FCRL3/SAMSN1/SLAMF8/XBP1/TIRAP/TFRC/BLK/PTPRC/ADA/SYK/TLR9/TNFSF13B/SASH3/INPP5D/NCKAP1L
BP	GO:0006954	inflammatory response	467	-0.45207	-1.30254	0.0256048	0.46549	0.449163	1481	tags=23%, list=12%, signal=21%	CXCR4/ECM1/GPR68/GPX1/NLRX1/MIF/MEFV/FUT7/CST7/PRKCQ/DAB2IP/PPARA/TUSC2/BCL6/CXCL8/ADCY8/ICAM1/TLR3/LTA/TYRO3/CCR4/CXCL2/THBS1/USP18/SIRPA/PROC/CIITA/CMA1/CD200R1/GRN/LOXL3/SIGLEC1/FANCD2/APOL3/CMKLR1/NRROS/B4GALT1/SNCA/ADAM8/CEBPA/TBK1/CRH/TRIL/SLAMF8/TIRAP/RB1/CNR2/CELA1/ADORA3/SEMA7A/CYBA/CDO1/PTGIR/LTB4R/CD200/HAVCR2/MCPH1/WNT5A/VPS35/SELP/PRCP/XCR1/PIK3CD/IL1RL1/PRDX5/C1QTNF3/HYAL3/CTSC/IL17…
BP	GO:0034103	regulation of tissue remodeling	54	-0.665959	-1.5191	0.0256048	0.46549	0.449163	962	tags=33%, list=8%, signal=31%	ATP6AP1/CD38/TNFRSF11B/CSK/DDR2/ADAM8/TFRC/SIGLEC15/FLT4/TMEM119/SYK/CALCA/CA2/INPP5D/ITGB3/CSF1R/RUNX1/HAMP
BP	GO:0006094	gluconeogenesis	72	0.692622	1.64833	0.0256885	0.465712	0.449377	588	tags=15%, list=5%, signal=15%	GCG/INS/PGAM2/ATF3/FAM3C/CRTC2/PC/SIRT7/PGK1/PPARGC1A/SLC39A14
BP	GO:1902106	negative regulation of leukocyte differentiation	64	-0.630734	-1.48059	0.0257432	0.465712	0.449377	1278	tags=27%, list=10%, signal=24%	BCL6/INHBA/TLR3/LOXL3/MAFB/SMAD7/GATA2/NRARP/HLA-G/ZBTB46/RUNX3/IRF1/PGLYRP2/INPP5D/C1QC/CCL3/RUNX1
BP	GO:0003206	cardiac chamber morphogenesis	97	0.618321	1.5149	0.0258352	0.466233	0.44988	1140	tags=24%, list=9%, signal=22%	LRP2/ADAMTS1/TGFBR1/HAND2/DSP/ISL1/SLIT2/MYBPC3/RYR2/FGFR2/ADGRG6/TBX2/TNNC1/WNT11/SEMA3C/TGFB2/NOTCH1/PROX1/HIF1A/NOTCH2/ZFPM1/CHD7/NPY2R
BP	GO:0046626	regulation of insulin receptor signaling pathway	59	0.721686	1.66005	0.0261139	0.46897	0.452521	37	tags=3%, list=0%, signal=3%	INS/TNS2
BP	GO:0060415	muscle tissue morphogenesis	55	0.650887	1.4855	0.0261139	0.46897	0.452521	1116	tags=25%, list=9%, signal=23%	LRP2/TGFBR1/DSP/ISL1/MYBPC3/RYR2/FGFR2/MYLK/TNNC1/TGFB2/NOTCH1/PROX1/ZFPM1/CHD7
BP	GO:0010948	negative regulation of cell cycle process	285	-0.495318	-1.37869	0.0264874	0.473051	0.456458	2069	tags=20%, list=16%, signal=17%	RRM2/MAD2L1/RGCC/USP47/NDC80/CDT1/EED/RNF2/CDK1/PCNA/L3MBTL2/PSMA8/DYNC1LI1/FBXO5/ZFYVE19/RBBP8/RAD51/PLK1/BABAM1/ATF5/TERF1/BUB3/MIF/DAB2IP/BCL6/PRMT2/BRSK1/E2F1/CDC6/CDK2/E2F8/PSMB6/PCGF2/SUSD2/E2F7/RB1/DONSON/ZNF268/AURKA/AURKB/HLA-G/CDC20/VPS4A/ORC1/NEK2/GFI1B/PSMB9/PSMB7/MAD2L1BP/GPR132/MYO16/PSME2/GEN1/PSMB8/CCNB1/NANOS2
BP	GO:0031668	cellular response to extracellular stimulus	186	0.543885	1.44242	0.0265859	0.473051	0.456458	1076	tags=14%, list=8%, signal=13%	AOC1/FOLR2/CYP24A1/ATF3/CLEC16A/MIOS/CYP27B1/GCN1/SZT2/EIF2AK3/PHEX/HMOX1/NUAK1/SEH1L/NCOA1/PPM1D/LRRK2/SLC38A3/SIK1/RPTOR/HSPA8/EIF2S1/INHBB/ULK1/CPEB4/PRKAG2
BP	GO:1902107	positive regulation of leukocyte differentiation	107	-0.586143	-1.46603	0.0266587	0.473051	0.456458	881	tags=21%, list=7%, signal=19%	BCL6/CD27/TESPA1/ADAM8/XBP1/RB1/HLA-G/ZBTB46/CCR1/MYB/RHOH/ZAP70/PTPRC/RUNX3/ADA/SYK/CA2/SASH3/INPP5D/CSF1/NCKAP1L/RUNX1
BP	GO:1903708	positive regulation of hemopoiesis	107	-0.586143	-1.46603	0.0266587	0.473051	0.456458	881	tags=21%, list=7%, signal=19%	BCL6/CD27/TESPA1/ADAM8/XBP1/RB1/HLA-G/ZBTB46/CCR1/MYB/RHOH/ZAP70/PTPRC/RUNX3/ADA/SYK/CA2/SASH3/INPP5D/CSF1/NCKAP1L/RUNX1
BP	GO:0006006	glucose metabolic process	172	0.570658	1.49896	0.0266805	0.473051	0.456458	1097	tags=15%, list=9%, signal=14%	GCG/INS/PDX1/PGAM2/ATF3/FAM3C/CRTC2/PC/SIRT7/ACACB/PDK1/PGK1/PPARGC1A/NCOA2/SLC39A14/NISCH/ONECUT1/PASK/SIK1/NKX1-1/SRC/CPT1A/SOGA1/APOD/INSR/PGAM1
MF	GO:0070008	serine-type exopeptidase activity	10	-0.865516	-1.52324	0.0267257	0.473051	0.456458	1035	tags=40%, list=8%, signal=37%	CPVL/SCPEP1/PRCP/F11
CC	GO:1990351	transporter complex	260	-0.481177	-1.32395	0.0269672	0.476184	0.459482	1122	tags=15%, list=9%, signal=14%	OLFM2/FKBP1B/CACNA1S/AMIGO1/ATP1A1/KCNAB2/LRRC52/MICU1/GRIK4/SLC9A1/GABRR2/MICU2/GRID2/KCNIP3/GABRB1/CTTN/CNGA3/SCN8A/GRIN1/GRIK2/TTYH3/SNAP25/CHRNA9/KCNIP2/GRIA2/PKD1/GABRR1/CLCN1/SHISA9/ATP1B4/CNIH2/GABRG3/ATP8B1/GABRD/CACNA2D3/KCNJ2/ABHD6/GRIN2C
CC	GO:0005903	brush border	85	0.631826	1.52847	0.0271266	0.477856	0.461094	903	tags=16%, list=7%, signal=15%	PDZK1/AMN/LRP2/TMPRSS15/SLC6A19/SLC15A1/PLB1/SLC26A6/ESPN/SOAT2/HSP90AB1/SLC28A3/ADD3/SLC5A6
BP	GO:0060351	cartilage development involved in endochondral bone morphogenesis	22	0.779006	1.52701	0.0272995	0.479756	0.462928	946	tags=18%, list=7%, signal=17%	TRPV4/AXIN2/COL27A1/COL2A1
BP	GO:0043371	negative regulation of CD4-positive, alpha-beta T cell differentiation	14	-0.834588	-1.52765	0.0274819	0.480748	0.463885	1278	tags=36%, list=10%, signal=32%	BCL6/LOXL3/SMAD7/RUNX3/RUNX1
BP	GO:0055074	calcium ion homeostasis	330	-0.4848	-1.36772	0.0275938	0.480748	0.463885	1333	tags=18%, list=10%, signal=16%	CIB2/TMTC2/STIM1/ANK2/CALB2/JPH3/ADCY8/TMBIM6/JPH1/SLC8A2/CCR4/BCAP31/FKBP1B/HEXB/CD55/MICU1/CMKLR1/MICU2/F2RL2/SNCA/P2RY1/GPR174/GATA2/PTGIR/DRD2/WNT5A/PLA2G1B/ATP2C1/XCR1/GRIN1/GRIK2/P2RY6/ATP2B1/CCR1/CHRNA9/KEL/C5AR1/SWAP70/PKD1/P2RY8/SLC24A4/CXCL10/SAA1/ADCYAP1/PTPRC/GNG3/TMEM38A/CALCA/FASLG/ADCY5/CXCR3/DMD/PTGER4/CCR7/CCL3/APOE/SLC30A1/GPR18/GRIN2C
BP	GO:0042100	B cell proliferation	56	-0.666658	-1.52862	0.0277523	0.480748	0.463885	1478	tags=29%, list=12%, signal=25%	CD38/MIF/GPR183/BCL6/FCRL3/TIRAP/TFRC/BLK/RASGRP1/PTPRC/ADA/TLR9/TNFSF13B/SASH3/INPP5D/NCKAP1L
CC	GO:0098862	cluster of actin-based cell projections	127	0.597079	1.51259	0.0278379	0.480748	0.463885	971	tags=14%, list=8%, signal=13%	PDZK1/AMN/LRP2/TMPRSS15/SLC6A19/SLC15A1/TRPA1/KNCN/FSCN2/PLB1/SLC26A6/ESPN/SOAT2/HSP90AB1/SLC28A3/ADD3/SLC5A6/MORN4
MF	GO:0005179	hormone activity	68	0.676315	1.60072	0.027868	0.480748	0.463885	162	tags=9%, list=1%, signal=9%	GCG/INS/SST/NMB/GUCA2A/NPY
CC	GO:0032009	early phagosome	11	-0.835486	-1.50249	0.0279097	0.480748	0.463885	372	tags=64%, list=3%, signal=62%	SNX3/RAB31/SYT7/APPL2/TLR7/SYK/TLR9
BP	GO:0006312	mitotic recombination	22	-0.759003	-1.51176	0.0279247	0.480748	0.463885	1667	tags=32%, list=13%, signal=28%	TPRKB/RAD51/BRCA2/SMC5/MLH1/DMC1/GEN1
CC	GO:0031902	late endosome membrane	111	-0.594836	-1.48784	0.0279527	0.480748	0.463885	2104	tags=33%, list=17%, signal=28%	VPS41/ARL8B/LAMTOR2/VPS18/WDR91/SPPL2A/MCOLN3/STX8/RAB7A/LAMTOR5/MMD/SLC38A9/STARD3/RHOB/VPS33A/LAPTM4A/VTI1A/LAMP1/SLC1A1/TMEM106B/LAMP5/SLC29A3/TSPAN15/TMEM9/RNF13/MR1/VPS33B/CDIP1/LAMP2/CD63/VPS4A/VPS11/TMEM59/SLC30A4/ANXA2/CYB561A3/ABHD6
BP	GO:0003229	ventricular cardiac muscle tissue development	43	0.693891	1.53187	0.0280313	0.480748	0.463885	1116	tags=30%, list=9%, signal=28%	LRP2/TGFBR1/DSP/ISL1/MYBPC3/RYR2/FGFR2/TNNC1/TGFB2/NOTCH1/PROX1/ADAMTS9/CHD7
BP	GO:0043691	reverse cholesterol transport	14	-0.83241	-1.52367	0.0280697	0.480748	0.463885	304	tags=29%, list=2%, signal=28%	LCAT/CLU/APOE/APOA4
CC	GO:0043296	apical junction complex	116	0.567347	1.42929	0.0280724	0.480748	0.463885	1715	tags=27%, list=13%, signal=23%	AOC1/FZD5/SHROOM4/TGFBR1/AMOT/CLDN11/ACTB/SAPCD2/MAGI2/KIFC3/CLDN10/SHROOM2/ANK3/CLDN1/TJP1/PARD6G/PARD3/LIN7B/CXADR/AMOTL2/ASH1L/ARHGAP17/ESAM/MARVELD2/CLDN20/MPP7/PLEKHA7/PDZD3/CLDN3/POF1B/FRMD4A
BP	GO:2001140	positive regulation of phospholipid transport	11	-0.835127	-1.50184	0.028193	0.481696	0.4648	164	tags=27%, list=1%, signal=27%	APOA1/FASLG/APOE
MF	GO:0005104	fibroblast growth factor receptor binding	20	0.808451	1.56065	0.0284746	0.484523	0.467528	1524	tags=35%, list=12%, signal=31%	KLB/FLRT3/FGF5/FGF7/FGF18/KL/FGF4
BP	GO:0055094	response to lipoprotein particle	25	-0.745607	-1.4922	0.028575	0.484523	0.467528	800	tags=20%, list=6%, signal=19%	CDH13/ADTRP/SYK/ITGB2/APOE
BP	GO:0030595	leukocyte chemotaxis	147	-0.573659	-1.49073	0.0287027	0.484523	0.467528	1337	tags=26%, list=11%, signal=23%	GPR183/PIP5K1C/PRSS56/CXCL8/MOSPD2/MST1/CXCL2/THBS1/CMKLR1/ADAM8/CKLF/SLAMF8/TIRAP/CNR2/RAC2/WNT5A/PLA2G1B/PIK3CD/PTPRO/CCR1/C5AR1/VAV1/SWAP70/CXCL10/SAA1/CSF3R/PREX1/SYK/ITGB2/CALCA/LGMN/CSF1/CXCR3/NCKAP1L/AIF1/CCR7/CCL3/CSF1R
MF	GO:0004529	exodeoxyribonuclease activity	18	-0.819334	-1.58256	0.0287706	0.484523	0.467528	14	tags=11%, list=0%, signal=11%	POLD1/DCLRE1A
MF	GO:0016895	exodeoxyribonuclease activity, producing 5'-phosphomonoesters	18	-0.819334	-1.58256	0.0287706	0.484523	0.467528	14	tags=11%, list=0%, signal=11%	POLD1/DCLRE1A
MF	GO:0016755	transferase activity, transferring amino-acyl groups	10	0.878403	1.54954	0.0289409	0.484523	0.467528	904	tags=40%, list=7%, signal=37%	QPCT/GGT7/TGM5/GGT1
MF	GO:0016493	C-C chemokine receptor activity	14	-0.828074	-1.51573	0.0289515	0.484523	0.467528	1481	tags=43%, list=12%, signal=38%	CXCR4/CCR4/XCR1/CCR1/CXCR3/CCR7
BP	GO:0003208	cardiac ventricle morphogenesis	58	0.684317	1.56569	0.0290055	0.484523	0.467528	1140	tags=28%, list=9%, signal=25%	LRP2/TGFBR1/HAND2/DSP/ISL1/MYBPC3/RYR2/FGFR2/TNNC1/SEMA3C/TGFB2/NOTCH1/PROX1/HIF1A/CHD7/NPY2R
BP	GO:0000470	maturation of LSU-rRNA	28	0.754406	1.58162	0.0290572	0.484523	0.467528	1051	tags=21%, list=8%, signal=20%	RPL7A/RPL10A/NSA2/RPL35/GTPBP4/RPL7
MF	GO:0070717	poly-purine tract binding	22	0.77417	1.51753	0.0291503	0.484523	0.467528	124	tags=9%, list=1%, signal=9%	PABPC4/RBMS2
BP	GO:0007389	pattern specification process	346	0.505428	1.39815	0.0291959	0.484523	0.467528	1724	tags=19%, list=14%, signal=17%	TBC1D32/FZD5/LRP2/FST/PGAP1/WNT7A/DYNC2H1/TGFBR1/HAND2/ISL1/FGFR2/CDX4/STIL/GLI1/FOXJ1/LRP6/ACVR2A/NEUROD1/RTTN/MEIS2/TBX2/ROR2/MEGF8/FOXD1/NKD1/C2CD3/VANGL2/WNT11/HELT/DDIT3/AXIN2/SEMA3C/RFNG/CDON/MMP21/MNS1/NOTCH1/MEIS1/DSCAML1/DNAI1/HIF1A/NOTCH2/LFNG/HES2/EFNB1/NR2F2/PBX3/PTCH1/HAND1/GREM1/KIF3B/DNAH5/SMO/FUZ/TBX22/ERBB4/STC1/HOXB5/HES6/HOXA10/TDRD5/FKBP8/BPTF/LEF1/LRP5/NKX2-5/NKX2-2
BP	GO:0030193	regulation of blood coagulation	58	-0.646342	-1.49129	0.0292119	0.484523	0.467528	1114	tags=31%, list=9%, signal=28%	KNG1/EDN1/PDGFB/NFE2L2/FGG/VTN/THBS1/PROC/CPB2/DMTN/TSPAN8/PLAUR/GP1BA/ADTRP/PLAU/SERPING1/APOE/F11
BP	GO:1900046	regulation of hemostasis	58	-0.646342	-1.49129	0.0292119	0.484523	0.467528	1114	tags=31%, list=9%, signal=28%	KNG1/EDN1/PDGFB/NFE2L2/FGG/VTN/THBS1/PROC/CPB2/DMTN/TSPAN8/PLAUR/GP1BA/ADTRP/PLAU/SERPING1/APOE/F11
BP	GO:0033209	tumor necrosis factor-mediated signaling pathway	121	-0.581972	-1.47398	0.0293164	0.485166	0.468149	1321	tags=15%, list=10%, signal=13%	TNFRSF11B/TAX1BP1/CD27/LTA/CDIP1/PLVAP/PSMB6/CARD14/RBCK1/TRAF2/PSMB9/PSMB7/SYK/TNFSF13B/PSME2/PSMB8/TNFSF12/TNFRSF1B
BP	GO:0009880	embryonic pattern specification	49	0.667444	1.49506	0.0294834	0.486839	0.469763	603	tags=16%, list=5%, signal=16%	FZD5/PGAP1/WNT7A/FGFR2/STIL/LRP6/MEIS2/C2CD3
BP	GO:0042110	T cell activation	305	-0.47965	-1.34412	0.029598	0.48764	0.470535	1278	tags=21%, list=10%, signal=20%	BCL6/CD27/ICAM1/FZD7/TMIGD2/CSK/TESPA1/GSN/MR1/SIRPA/FKBP1B/DUSP3/LOXL3/EBI3/CD55/MAFB/FANCD2/SMAD7/ADAM8/CRTAM/HLA-A/XBP1/NRARP/TFRC/RAC2/HAVCR2/B2M/PIK3CD/CD2/HLA-G/RASGRP1/SLAMF6/HLA-DPA1/MYB/LY9/RHOH/VAV1/SLC46A2/TIGIT/CD6/CD276/ZAP70/PTPRC/RUNX3/IRF1/WAS/PREX1/ADA/SYK/TNFSF13B/LRRC32/SASH3/LCP1/HLA-DPB1/PTGER4/NCKAP1L/AIF1/CD3E/ITK/TWSG1/CCR7/CD274/CD3D/RUNX1/TNFRSF1B
BP	GO:0071624	positive regulation of granulocyte chemotaxis	19	-0.784998	-1.53401	0.029892	0.489005	0.471853	2050	tags=53%, list=16%, signal=44%	LBP/EDN1/S100A14/CXCL8/MOSPD2/TIRAP/RAC2/C5AR1/NCKAP1L/CCR7
MF	GO:0060229	lipase activator activity	11	-0.833545	-1.499	0.0298987	0.489005	0.471853	55	tags=27%, list=0%, signal=27%	GM2A/APOH/CCL3
BP	GO:0045600	positive regulation of fat cell differentiation	50	0.689151	1.55592	0.0300877	0.489005	0.471853	283	tags=6%, list=2%, signal=6%	INS/TPH1/CCDC3
BP	GO:0001655	urogenital system development	273	0.536986	1.47105	0.0300915	0.489005	0.471853	1439	tags=18%, list=11%, signal=16%	TBC1D32/LRP2/TNS2/BMPER/ADAMTS1/DYNC2H1/TGFBR1/SLIT2/FREM2/FGFR2/GLI1/MMP9/FOXJ1/MAGI2/STRA6/FOXD1/HSPB11/ASXL1/VANGL2/WNT11/LRRK2/SIX4/KCNJ8/POU3F3/SULF1/FMN1/NFIA/TGFB2/NOTCH1/DLG5/PROX1/MPV17/ARID5B/LAMA5/CRLF1/ACTA2/MYC/NOTCH2/UMOD/PDGFRA/ACE/SEC61A1/PLXND1/PTCH1/HPGD/GREM1/LZTS2/PLAG1/SMO
BP	GO:0046324	regulation of glucose import	42	0.68923	1.52575	0.0301447	0.489005	0.471853	5	tags=2%, list=0%, signal=2%	INS
BP	GO:0019724	B cell mediated immunity	77	-0.630181	-1.51194	0.0301802	0.489005	0.471853	1808	tags=32%, list=14%, signal=28%	C3/NDFIP1/C4B/C8A/C7/IGLL1/BCL6/CD27/LTA/PARP3/UNG/MLH1/CD55/C4BPA/TFRC/HLA-G/SWAP70/CRP/CFI/CLU/PTPRC/SERPING1/C1QA/INPP5D/C1QC
MF	GO:0016628	oxidoreductase activity, acting on the CH-CH group of donors, NAD or NADP as acceptor	23	-0.760182	-1.52127	0.0302457	0.489005	0.471853	2053	tags=48%, list=16%, signal=40%	SRD5A3/SRD5A1/BDH2/DHCR7/DECR1/DECR2/PECR/FASN/AKR1D1/TECR/DHCR24
MF	GO:0070325	lipoprotein particle receptor binding	23	-0.760158	-1.52122	0.0302457	0.489005	0.471853	381	tags=22%, list=3%, signal=21%	DKK1/CRP/CLU/APOE/HSPG2
BP	GO:0002793	positive regulation of peptide secretion	115	0.618445	1.55608	0.0302896	0.489005	0.471853	510	tags=7%, list=4%, signal=7%	GCG/INS/CFTR/PDX1/ISL1/RFX6/APBB1/NR0B2
BP	GO:2000736	regulation of stem cell differentiation	98	-0.61108	-1.50876	0.0304467	0.489005	0.471853	1088	tags=15%, list=9%, signal=14%	JAG1/TAL1/GATA2/PSMB6/PRICKLE1/SOX6/MYB/PSMB9/PSMB7/GDNF/PSME2/PSMB8/ESRRB/RUNX1/OCIAD2
BP	GO:0048569	post-embryonic animal organ development	11	0.857335	1.5282	0.030458	0.489005	0.471853	24	tags=9%, list=0%, signal=9%	FZD5
BP	GO:0043277	apoptotic cell clearance	35	-0.714888	-1.50682	0.0304758	0.489005	0.471853	1925	tags=31%, list=15%, signal=27%	RHOG/C3/C4B/XKR8/TYRO3/THBS1/RAC2/RHOH/XKR5/MARCO/ITGB3
BP	GO:0048048	embryonic eye morphogenesis	27	0.773414	1.61745	0.0306044	0.489222	0.472062	884	tags=22%, list=7%, signal=21%	FZD5/TH/LRP6/TBX2/STRA6/PROX1
BP	GO:0051571	positive regulation of histone H3-K4 methylation	18	0.827246	1.58828	0.030677	0.489222	0.472062	957	tags=22%, list=8%, signal=21%	GCG/KMT2A/KMT2E/PRDM9
BP	GO:1903706	regulation of hemopoiesis	277	-0.485573	-1.34946	0.0308198	0.489222	0.472062	1278	tags=18%, list=10%, signal=17%	BCL6/INHBA/CD27/TLR3/TESPA1/THBS1/JAG1/FCRL3/LOXL3/TAL1/MAFB/FANCD2/SMAD7/ADAM8/CRTAM/GATA2/SLAMF8/XBP1/RB1/NRARP/MED1/B2M/CD2/HLA-G/ZBTB46/CCR1/GP1BA/MYB/RHOH/SLC46A2/GFI1B/ZAP70/PTPRC/RUNX3/IRF1/PGLYRP2/CSF3R/ADA/SYK/CA2/TLR9/SASH3/INPP5D/CSF1/NCKAP1L/C1QC/KLF13/SPI1/CCL3/RUNX1
BP	GO:0032024	positive regulation of insulin secretion	56	0.682918	1.56695	0.0308312	0.489222	0.472062	179	tags=9%, list=1%, signal=9%	GCG/CFTR/PDX1/ISL1/RFX6
MF	GO:0005372	water transmembrane transporter activity	10	0.874653	1.54292	0.0308387	0.489222	0.472062	69	tags=20%, list=1%, signal=20%	SLC14A1/AQP8
BP	GO:0071622	regulation of granulocyte chemotaxis	34	-0.693725	-1.44685	0.0309539	0.489222	0.472062	1248	tags=41%, list=10%, signal=37%	EDN1/AKIRIN1/S100A14/CXCL8/MOSPD2/THBS1/CMKLR1/TIRAP/RAC2/C5AR1/CSF1/NCKAP1L/CCR7/CSF1R
BP	GO:1903539	protein localization to postsynaptic membrane	34	-0.693957	-1.44734	0.0309539	0.489222	0.472062	475	tags=12%, list=4%, signal=11%	SNAP25/CLSTN1/STX1B/GRIN2C
CC	GO:0098839	postsynaptic density membrane	76	-0.600084	-1.43677	0.0310196	0.489222	0.472062	839	tags=16%, list=7%, signal=15%	PRRT2/SIGMAR1/GRID2/LRRC4B/CLSTN1/GRIA2/PTPRS/SHISA9/CNIH2/SLITRK3/SLC30A1/GRIN2C
BP	GO:0035025	positive regulation of Rho protein signal transduction	26	-0.736352	-1.475	0.0311809	0.490717	0.473505	1346	tags=31%, list=11%, signal=28%	ARHGEF3/RTN4R/F2RL2/GPR174/ROBO1/P2RY8/NET1/GPR18
BP	GO:0035461	vitamin transmembrane transport	14	0.839529	1.57093	0.0314114	0.493292	0.475989	903	tags=29%, list=7%, signal=27%	FOLR2/LRP2/STRA6/SLC5A6
BP	GO:0007052	mitotic spindle organization	101	-0.584083	-1.45089	0.0317785	0.495653	0.478267	2150	tags=30%, list=17%, signal=25%	MISP/CCSAP/MAP9/RHOA/NDC80/STMN1/PLK1/KIF11/MAP10/DLGAP5/KIF23/GNAI1/PARP3/TUBG1/CEP126/STAG1/FSD1/SPICE1/TPX2/NUMA1/NUF2/AURKA/AURKB/CDC20/MYBL2/NEK2/PRC1/PKD1/CCNB1/EML1
BP	GO:0031060	regulation of histone methylation	48	0.673352	1.50173	0.0318421	0.495653	0.478267	957	tags=12%, list=8%, signal=12%	GCG/KMT2A/GFI1/KMT2E/RIF1/PRDM9
BP	GO:0030890	positive regulation of B cell proliferation	29	-0.731524	-1.51213	0.0318558	0.495653	0.478267	1478	tags=45%, list=12%, signal=40%	CD38/MIF/GPR183/BCL6/FCRL3/TIRAP/TFRC/PTPRC/ADA/TLR9/TNFSF13B/SASH3/NCKAP1L
BP	GO:0042590	antigen processing and presentation of exogenous peptide antigen via MHC class I	67	-0.637845	-1.49639	0.0319002	0.495653	0.478267	822	tags=28%, list=6%, signal=27%	PSMA6/PSMD10/PDIA3/PSMD9/TAP1/VAMP3/PSMA8/NCF1/TAP2/PSMB6/HLA-A/CYBA/B2M/HLA-G/FCGR1A/PSMB9/PSMB7/PSME2/PSMB8
BP	GO:0010817	regulation of hormone levels	391	0.48966	1.35785	0.0319838	0.495653	0.478267	968	tags=10%, list=8%, signal=10%	PCSK2/GCG/INS/PCSK1/NMB/CFTR/SCG5/PDX1/CACNA1C/ISL1/RFX6/CYP1B1/DHRS13/CYP27B1/CYP2W1/FDX1/SLCO1C1/NEUROD1/PLB1/SLC16A1/STXBP5L/ECE2/NR0B2/FOXD1/PPARGC1A/SLC39A14/GFI1/PNPLA2/KCNC2/PASK/RIMS2/CREB1/VGF/SSTR5/RETSAT/RDH13/NR1D1/FAM3D/INHBB/CPT1A
BP	GO:0035589	G protein-coupled purinergic nucleotide receptor signaling pathway	12	-0.84684	-1.53365	0.0320318	0.495653	0.478267	1344	tags=42%, list=11%, signal=37%	P2RY12/P2RY1/P2RY6/P2RY8/P2RY11
MF	GO:0045028	G protein-coupled purinergic nucleotide receptor activity	12	-0.84684	-1.53365	0.0320318	0.495653	0.478267	1344	tags=42%, list=11%, signal=37%	P2RY12/P2RY1/P2RY6/P2RY8/P2RY11
BP	GO:0045621	positive regulation of lymphocyte differentiation	68	-0.63811	-1.50366	0.0323952	0.500228	0.482682	1278	tags=25%, list=10%, signal=23%	BCL6/CD27/TESPA1/ADAM8/XBP1/HLA-G/MYB/RHOH/ZAP70/PTPRC/RUNX3/ADA/SYK/SASH3/INPP5D/NCKAP1L/RUNX1
BP	GO:0072676	lymphocyte migration	69	-0.629293	-1.48038	0.032515	0.501029	0.483455	1461	tags=29%, list=11%, signal=26%	ECM1/MSN/FUT7/GPR183/ICAM1/CD200R1/ADAM8/CKLF/CRTAM/CD200/WNT5A/PIK3CD/ADTRP/CXCL10/ZAP70/SAA1/CXCR3/AIF1/CCR7/CCL3
BP	GO:0090181	regulation of cholesterol metabolic process	54	-0.652888	-1.48928	0.0326021	0.501325	0.483741	1841	tags=26%, list=14%, signal=22%	SOD1/APOB/FGF1/GNB3/IDI1/DHCR7/PMVK/CYP51A1/FASN/SREBF1/DGAT2/FMO5/APOE/SCD
BP	GO:0086103	G protein-coupled receptor signaling pathway involved in heart process	11	0.854848	1.52377	0.0326705	0.501332	0.483747	1202	tags=45%, list=9%, signal=41%	RGS2/PLN/AKAP13/SRC/ATP2B4
BP	GO:0043370	regulation of CD4-positive, alpha-beta T cell differentiation	27	-0.738998	-1.50182	0.03304	0.505951	0.488205	1278	tags=30%, list=10%, signal=27%	BCL6/LOXL3/SMAD7/MYB/RUNX3/SASH3/NCKAP1L/RUNX1
BP	GO:0045582	positive regulation of T cell differentiation	56	-0.649549	-1.48939	0.033141	0.506162	0.488408	1278	tags=29%, list=10%, signal=26%	BCL6/CD27/TESPA1/ADAM8/XBP1/HLA-G/MYB/RHOH/ZAP70/PTPRC/RUNX3/ADA/SYK/SASH3/NCKAP1L/RUNX1
BP	GO:0008543	fibroblast growth factor receptor signaling pathway	94	0.627276	1.5353	0.033191	0.506162	0.488408	1524	tags=16%, list=12%, signal=14%	KLB/FLRT3/FGFR2/SPRY4/GALNT3/RBFOX2/ANOS1/FGF5/SULF1/KIF16B/FGF7/FGF18/KL/FUZ/FGF4
BP	GO:0000070	mitotic sister chromatid segregation	142	-0.536302	-1.39071	0.0333803	0.506286	0.488528	2249	tags=27%, list=18%, signal=22%	PIBF1/SMC2/CDC27/DSN1/EML4/MAD2L1/NDC80/CDT1/CUL3/NEK6/DYNC1LI1/FBXO5/PLK1/NCAPG2/MAP10/BUB3/DLGAP5/KIF23/TUBG1/NCAPD2/SMC5/CDC6/KIF2C/UBE2C/CENPK/NUMA1/RB1/NUF2/AURKB/CDC20/NCAPD3/VPS4A/NUSAP1/NEK2/PRC1/MAD2L1BP/GEN1/CCNB1
CC	GO:0045335	phagocytic vesicle	111	-0.575699	-1.43997	0.0333803	0.506286	0.488528	2200	tags=28%, list=17%, signal=23%	APPL2/LTF/TAP1/ATP6V0E1/VPS26B/VAMP3/STX8/RAB7A/RAB11B/VIM/NCF1/PGLYRP1/TAP2/LAMP1/GSN/RAB22A/RAB10/ADAM8/LAMP2/HLA-A/CYBA/RAC2/B2M/HLA-G/TLR1/TLR7/CTSS/WAS/SYK/TLR9/MPEG1
BP	GO:0042403	thyroid hormone metabolic process	20	-0.764739	-1.50769	0.0335076	0.506286	0.488528	613	tags=30%, list=5%, signal=29%	MED1/SLC16A10/TG/CPQ/TPO/CTSK
CC	GO:0099634	postsynaptic specialization membrane	95	-0.573151	-1.40494	0.033562	0.506286	0.488528	839	tags=14%, list=7%, signal=13%	PRRT2/SIGMAR1/GRID2/LRRC4B/CHRNA9/CLSTN1/GRIA2/PTPRS/SHISA9/CNIH2/SLITRK3/SLC30A1/GRIN2C
CC	GO:0005839	proteasome core complex	17	-0.803543	-1.53969	0.0337088	0.506286	0.488528	822	tags=29%, list=6%, signal=28%	PSMA8/PSMB6/PSMB9/PSMB7/PSMB8
BP	GO:0006417	regulation of translation	296	0.510511	1.41276	0.0337447	0.506286	0.488528	2212	tags=23%, list=17%, signal=19%	IGF2BP1/RGS2/IGF2BP2/EIF3H/CAPRIN2/GCN1/EIF3C/RPS9/RPL13A/EIF2AK3/RPS3/CSDE1/EIF3B/RPS14/RPL30/HSPB1/RBM24/ITGA2/AGO4/RPL10/RPL26/PASK/RPS4X/EIF2S3/NEURL1/LRPPRC/IGF2BP3/SECISBP2L/EIF2A/QKI/RPS6KA3/EIF2S1/PABPC1/UPF1/RPL22/CPEB4/MOV10/CAPRIN1/DDX1/DHX9/GIGYF2/KHDRBS1/PUM1/EIF4G1/MTIF2/RPS6KB2/PIWIL1/TNRC6A/IMPACT/RPL5/CIRBP/PER1/CALR/ZC3H12A/NAT10/UNK/CNOT2/ZFP36L1/EIF6/YBX2/EIF2AK4/EIF3E/PPP1R15…
BP	GO:0001782	B cell homeostasis	23	-0.753308	-1.50751	0.0337694	0.506286	0.488528	213	tags=17%, list=2%, signal=17%	PKN1/ADA/TNFSF13B/NCKAP1L
BP	GO:0060628	regulation of ER to Golgi vesicle-mediated transport	14	0.836723	1.56568	0.033851	0.506286	0.488528	614	tags=14%, list=5%, signal=14%	PGAP1/LRRK2
BP	GO:0036005	response to macrophage colony-stimulating factor	11	-0.826822	-1.48691	0.033885	0.506286	0.488528	142	tags=18%, list=1%, signal=18%	CSF1/CSF1R
BP	GO:0036006	cellular response to macrophage colony-stimulating factor stimulus	11	-0.826822	-1.48691	0.033885	0.506286	0.488528	142	tags=18%, list=1%, signal=18%	CSF1/CSF1R
BP	GO:0032928	regulation of superoxide anion generation	16	-0.780641	-1.46724	0.0340466	0.50748	0.489679	655	tags=31%, list=5%, signal=30%	SOD1/PON3/CRP/SYK/ITGB2
MF	GO:0120015	sterol transfer activity	18	-0.805832	-1.55648	0.0341024	0.50748	0.489679	2039	tags=56%, list=16%, signal=47%	STAR/GRAMD1C/APOA1/GRAMD1B/APOB/PLTP/NPC2/STARD3/APOE/APOA4
BP	GO:0034695	response to prostaglandin E	17	-0.802018	-1.53677	0.0343054	0.509473	0.491603	119	tags=18%, list=1%, signal=18%	GNB1/PTGER4/CCR7
CC	GO:0101002	ficolin-1-rich granule	154	-0.538078	-1.405	0.0345907	0.51122	0.493289	1728	tags=21%, list=14%, signal=18%	BIN2/LRG1/MVP/CLEC4C/DOK3/ATG7/MIF/ARSB/ACTR2/LAMP1/GAA/STBD1/GSN/SIRPA/CD55/CD93/GMFG/ADAM8/CTSD/LAMP2/PRDX4/PRCP/GYG1/PSMB7/CTSS/SIGLEC5/GLB1/PTPRN2/EEF2/ITGB2/NCKAP1L/CLEC4D
BP	GO:0033189	response to vitamin A	16	-0.780213	-1.46644	0.0346491	0.51122	0.493289	491	tags=19%, list=4%, signal=18%	EPO/CYP1A1/HAMP
BP	GO:0045089	positive regulation of innate immune response	153	-0.543572	-1.41862	0.0346534	0.51122	0.493289	881	tags=14%, list=7%, signal=13%	ADAM8/TBK1/CRTAM/PSMB6/HAVCR2/WNT5A/SH2D1A/MED1/HLA-G/RASGRP1/SLAMF6/VAV1/PSMB9/PSMB7/SYK/PSME2/PSMB8/CLEC10A/SH2D1B/CLNK/CLEC4D
BP	GO:0060713	labyrinthine layer morphogenesis	17	0.817398	1.56299	0.0347187	0.51122	0.493289	708	tags=24%, list=6%, signal=22%	FZD5/FGFR2/NCOA1/IL10
BP	GO:0010758	regulation of macrophage chemotaxis	21	-0.782191	-1.5483	0.0348758	0.51122	0.493289	1426	tags=43%, list=11%, signal=38%	AKIRIN1/MIF/MST1/THBS1/CMKLR1/SLAMF8/C5AR1/CSF1/CSF1R
BP	GO:0015669	gas transport	12	-0.842257	-1.52535	0.0349174	0.51122	0.493289	1152	tags=58%, list=9%, signal=53%	CYGB/AQP1/RHAG/HBZ/CA2/HBE1/MB
MF	GO:0022804	active transmembrane transporter activity	224	0.538451	1.45591	0.0349567	0.51122	0.493289	903	tags=15%, list=7%, signal=14%	ABCC12/CFTR/SLC6A19/SLC5A10/SLC15A1/SLC16A6/SLC22A2/SLC10A2/SLC39A8/SLC10A1/SLC13A1/SLC8A3/SLCO1C1/SLC35D1/ABCA4/ABCG4/SLC16A1/SLC12A2/SLC26A6/SLC20A2/SLC5A11/ABCD2/SLC22A6/SLC39A14/ABCC4/SLC26A5/SLC38A3/SLC4A10/SLC47A1/SLC28A3/SLC12A3/SLC4A3/SLC5A6
MF	GO:0003729	mRNA binding	238	0.530922	1.4445	0.0350811	0.51122	0.493289	1546	tags=18%, list=12%, signal=16%	PABPC4/IGF2BP1/IGF2BP2/RBMS2/YTHDC1/RPL13A/RPS26/RPS13/RPS2/CSDC2/RBFOX2/RPS3/RPS14/RPL30/RBM24/EIF3A/RPL35/PCF11/RPS7/RPL26/IGF2BP3/SECISBP2L/EIF2A/RPS5/RPS3A/QKI/HDLBP/PABPC1/CPEB4/RPL7/EIF4A1/RBM14/DHX9/SCAF8/TUT1/KHDRBS1/PUM1/CELF2/ANGEL2/EIF4G1/THOC2/PIWIL1
MF	GO:0048185	activin binding	11	0.852942	1.52037	0.0352079	0.51122	0.493289	309	tags=27%, list=2%, signal=27%	FST/TGFBR1/ACVR2A
BP	GO:0030071	regulation of mitotic metaphase/anaphase transition	56	-0.64473	-1.47834	0.0352964	0.51122	0.493289	2705	tags=41%, list=21%, signal=32%	LCMT1/PCID2/BUB1/KNTC1/CDC27/MAD2L1/NDC80/CDT1/CUL3/NEK6/DYNC1LI1/FBXO5/PLK1/BUB3/DLGAP5/CDC6/UBE2C/RB1/AURKB/CDC20/MAD2L1BP/GEN1/CCNB1
BP	GO:0009404	toxin metabolic process	12	0.853784	1.54851	0.0353207	0.51122	0.493289	215	tags=42%, list=2%, signal=41%	DDC/AS3MT/TH/CYP1B1/CYP2W1
BP	GO:0048596	embryonic camera-type eye morphogenesis	21	0.806674	1.57098	0.0353577	0.51122	0.493289	884	tags=29%, list=7%, signal=27%	FZD5/TH/LRP6/TBX2/STRA6/PROX1
BP	GO:1901292	nucleoside phosphate catabolic process	72	-0.609108	-1.44732	0.0354249	0.51122	0.493289	597	tags=8%, list=5%, signal=8%	PDE7A/NUDT7/NT5C2/ADA/SARM1/ENTPD3
BP	GO:1902750	negative regulation of cell cycle G2/M phase transition	92	-0.582248	-1.42478	0.0354565	0.51122	0.493289	2004	tags=22%, list=16%, signal=18%	USP47/CDK1/PSMA8/ZFYVE19/PLK1/BABAM1/ATF5/BRSK1/CDC6/PSMB6/DONSON/AURKA/AURKB/VPS4A/ORC1/PSMB9/PSMB7/GPR132/PSME2/PSMB8
BP	GO:0034162	toll-like receptor 9 signaling pathway	21	-0.781615	-1.54716	0.0354619	0.51122	0.493289	1016	tags=24%, list=8%, signal=22%	FCRL3/HAVCR2/TLR7/PTPRS/TLR9
BP	GO:0001819	positive regulation of cytokine production	286	-0.475871	-1.32419	0.0357073	0.513214	0.495212	1022	tags=20%, list=8%, signal=19%	SLC7A5/EBI3/MAPK11/ARHGEF2/ADAM8/TBK1/CRTAM/HLA-A/XBP1/TIRAP/SEMA7A/CYBA/DRD2/CD200/HAVCR2/WNT5A/FLT4/PLA2G1B/B2M/IL1RL1/TRAF2/CD2/HLA-G/C1QTNF3/IL17F/RASGRP1/SLAMF6/HLA-DPA1/TLR1/MYB/LY9/C5AR1/TLR7/TIGIT/CD6/CD276/SAA1/CLU/ADCYAP1/PTPRC/PANX2/IRF1/ADRA2A/SYK/TLR9/SASH3/HLA-DPB1/PTGER4/AIF1/CD3E/CCR7/CD274/IRF8/CCL3/CSF1R/RUNX1/CLNK
BP	GO:0009068	aspartate family amino acid catabolic process	20	-0.761984	-1.50226	0.0358385	0.513214	0.495212	776	tags=30%, list=6%, signal=28%	SDSL/PIPOX/OGDH/PHYKPL/ASRGL1/MAT1A
CC	GO:0051233	spindle midzone	33	-0.695185	-1.45396	0.0358385	0.513214	0.495212	2074	tags=42%, list=16%, signal=36%	ARL8B/MAP9/CENPV/PLK1/MAP10/CDC6/MAPRE3/NUMA1/CTTN/UNC119/AURKA/AURKB/PRC1/EML1
BP	GO:0098739	import across plasma membrane	123	0.570454	1.44394	0.0358784	0.513214	0.495212	903	tags=15%, list=7%, signal=14%	TRPV4/FOLR2/LRP2/ACSL5/RGS2/SLC15A1/SLC22A2/SLC39A8/SLC7A1/SLC7A3/SLC8A3/SLC2A5/SLC12A2/WNK1/SLC39A14/KCNJ8/SLC47A1/SLC12A3/SLC5A6
CC	GO:1990023	mitotic spindle midzone	12	-0.839811	-1.52092	0.0360717	0.514342	0.496301	837	tags=50%, list=7%, signal=47%	MAP10/NUMA1/CTTN/AURKB/PRC1/EML1
BP	GO:0010906	regulation of glucose metabolic process	93	0.605099	1.47838	0.0360966	0.514342	0.496301	735	tags=12%, list=6%, signal=11%	GCG/INS/FAM3C/SIRT7/ACACB/PDK1/PPARGC1A/NCOA2/PASK/SIK1/NKX1-1
CC	GO:0097060	synaptic membrane	327	-0.474354	-1.33776	0.0361755	0.514473	0.496427	1622	tags=20%, list=13%, signal=18%	SLC8A1/SRPX2/PALM/LRRTM4/ERC2/CNTNAP1/DTNBP1/ZC4H2/GABRA6/RGS9/CHRNA1/PCDH17/GAD2/ANK2/GABRG2/CALB2/SNAP91/DLG2/ADCY8/NRXN1/SLC1A6/TMEM240/GPM6A/GRIK4/GABRR2/P2RY1/CSPG5/PRRT2/LZTS1/SIGMAR1/GRID2/NRP2/GABRB1/DRD2/CRYAB/SSPN/SYAP1/KCTD12/GRIN1/GRIK2/ATP2B1/SLITRK2/SNAP25/CBLN1/LRRC4B/CHRNA9/GRM7/CLSTN1/GRIA2/GABRR1/STX1B/PTPRS/SHISA9/CNIH2/GABRG3/STX2/RIMS4/DMD/GABRD/ITGB3/SLITRK3/IGSF21/SLC30A1/A…
BP	GO:1904251	regulation of bile acid metabolic process	11	0.85147	1.51775	0.0364766	0.517595	0.499439	918	tags=27%, list=7%, signal=25%	MALRD1/PROX1/NR1D1
BP	GO:0001816	cytokine production	489	-0.435242	-1.26442	0.0365353	0.517595	0.499439	1039	tags=17%, list=8%, signal=16%	CMA1/SLC7A5/CD200R1/EBI3/MAPK11/CD55/ARHGEF2/SMAD7/CMKLR1/NRROS/ADAM8/TBK1/CRTAM/TGFB3/TRIL/HLA-A/XBP1/TIRAP/SEMA7A/CYBA/SNAI2/DRD2/CD200/HAVCR2/WNT5A/FLT4/PLA2G1B/B2M/PIK3CD/IL1RL1/TRAF2/CD2/HLA-G/C1QTNF3/IL17F/RASGRP1/ATP2B1/SLAMF6/HLA-DPA1/TLR1/MYB/HOMER2/LY9/C5AR1/CRP/TLR7/TIGIT/CD6/CD276/SIGIRR/SAA1/PTPRS/CLU/ADCYAP1/PTPRC/PANX2/IRF1/PGLYRP2/ADRA2A/HDAC9/IL5RA/SYK/TLR9/LRRC32/SASH3/CD84/INPP…
BP	GO:0046501	protoporphyrinogen IX metabolic process	11	-0.824179	-1.48215	0.0367324	0.518974	0.50077	48	tags=18%, list=0%, signal=18%	UROD/ALAS2
BP	GO:0031058	positive regulation of histone modification	73	0.620694	1.47892	0.0367732	0.518974	0.50077	957	tags=12%, list=8%, signal=11%	GCG/ISL1/KMT2A/PPARGC1A/LRRK2/SPHK2/KMT2E/RIF1/PRDM9
BP	GO:0001817	regulation of cytokine production	455	-0.437521	-1.26097	0.0369879	0.520147	0.501902	1022	tags=17%, list=8%, signal=16%	SLC7A5/CD200R1/EBI3/MAPK11/ARHGEF2/SMAD7/CMKLR1/ADAM8/TBK1/CRTAM/TGFB3/TRIL/HLA-A/XBP1/TIRAP/SEMA7A/CYBA/SNAI2/DRD2/CD200/HAVCR2/WNT5A/FLT4/PLA2G1B/B2M/IL1RL1/TRAF2/CD2/HLA-G/C1QTNF3/IL17F/RASGRP1/ATP2B1/SLAMF6/HLA-DPA1/TLR1/MYB/HOMER2/LY9/C5AR1/CRP/TLR7/TIGIT/CD6/CD276/SIGIRR/SAA1/PTPRS/CLU/ADCYAP1/PTPRC/PANX2/IRF1/PGLYRP2/ADRA2A/HDAC9/IL5RA/SYK/TLR9/LRRC32/SASH3/CD84/INPP5D/HLA-DPB1/PTGER4/NCKA…
BP	GO:0051480	regulation of cytosolic calcium ion concentration	250	-0.497565	-1.36928	0.0370458	0.520147	0.501902	1333	tags=19%, list=10%, signal=18%	CIB2/ANK2/CALB2/JPH3/ADCY8/TMBIM6/JPH1/SLC8A2/CCR4/BCAP31/FKBP1B/CD55/CMKLR1/F2RL2/SNCA/P2RY1/GPR174/GATA2/PTGIR/DRD2/WNT5A/PLA2G1B/XCR1/GRIN1/P2RY6/ATP2B1/CCR1/CHRNA9/C5AR1/SWAP70/PKD1/P2RY8/CXCL10/SAA1/ADCYAP1/PTPRC/GNG3/TMEM38A/CALCA/FASLG/ADCY5/CXCR3/DMD/PTGER4/CCR7/CCL3/GPR18/GRIN2C
BP	GO:0031639	plasminogen activation	18	-0.800183	-1.54557	0.0370678	0.520147	0.501902	275	tags=28%, list=2%, signal=27%	THBS1/CPB2/PLAU/RUNX1/F11
BP	GO:0060078	regulation of postsynaptic membrane potential	118	-0.565216	-1.4197	0.0373143	0.522612	0.504281	1440	tags=19%, list=11%, signal=17%	GABRA6/CHRNA1/CELF4/GABRG2/NRXN1/SLC8A2/GRIK4/GABRR2/GRID2/GABRB1/DRD2/ADRB1/GRIN1/GRIK2/CBLN1/CHRNA9/GABRR1/STX1B/ADCYAP1/GABRG3/SLC29A1/GRIN2C
BP	GO:0022407	regulation of cell-cell adhesion	291	-0.473226	-1.31557	0.0376544	0.526377	0.507913	1358	tags=21%, list=11%, signal=19%	PRKCQ/PPARA/ZNF703/BCL6/CD27/ICAM1/TMIGD2/CSK/TESPA1/JAG1/SIRPA/DUSP3/LOXL3/EBI3/CD55/SMAD7/ADAM8/FUT9/CRTAM/HLA-A/XBP1/DMTN/NRARP/PDPN/TFRC/HAVCR2/PLAUR/WNT5A/BLK/SELP/HLA-G/HLA-DPA1/MYB/ADTRP/RHOH/VAV1/SWAP70/SKAP1/TIGIT/CD6/CD276/ZAP70/PTPRC/RUNX3/IRF1/ADA/SYK/ITGB2/TNFSF13B/LRRC32/SASH3/ASS1/HLA-DPB1/NCKAP1L/AIF1/CD3E/TWSG1/CCR7/CD274/RUNX1
BP	GO:0032675	regulation of interleukin-6 production	88	-0.593754	-1.44894	0.0379277	0.526722	0.508247	1228	tags=24%, list=10%, signal=22%	TLR3/CSK/SIRPA/CD200R1/ARHGEF2/XBP1/TIRAP/CYBA/CD200/HAVCR2/WNT5A/C1QTNF3/IL17F/TLR1/TLR7/ADCYAP1/SYK/TLR9/INPP5D/NCKAP1L/AIF1
BP	GO:1902991	regulation of amyloid precursor protein catabolic process	32	-0.692522	-1.4433	0.0379545	0.526722	0.508247	406	tags=12%, list=3%, signal=12%	RTN3/NTRK2/CLU/APOE
BP	GO:2000106	regulation of leukocyte apoptotic process	57	-0.654838	-1.51135	0.0379851	0.526722	0.508247	1549	tags=25%, list=12%, signal=22%	TSC22D3/PRKCQ/BCL6/CD27/HCAR2/ADAM8/WNT5A/BLK/PIK3CD/AURKB/SLC46A2/ADA/CCR7/CD274
BP	GO:0051784	negative regulation of nuclear division	51	-0.652894	-1.48144	0.038059	0.526722	0.508247	569	tags=25%, list=4%, signal=24%	MAD2L1/NDC80/CDT1/DYNC1LI1/FBXO5/PLK1/BUB3/AURKB/CDC20/MAD2L1BP/GEN1/CCNB1/NANOS2
BP	GO:0048490	anterograde synaptic vesicle transport	19	-0.770046	-1.5048	0.0381786	0.526722	0.508247	1506	tags=53%, list=12%, signal=46%	BLOC1S5/BLOC1S6/DTNBP1/SNAPIN/BLOC1S3/BLOC1S2/AP3M2/BORCS5/CNIH2/MAP2
BP	GO:0099514	synaptic vesicle cytoskeletal transport	19	-0.770046	-1.5048	0.0381786	0.526722	0.508247	1506	tags=53%, list=12%, signal=46%	BLOC1S5/BLOC1S6/DTNBP1/SNAPIN/BLOC1S3/BLOC1S2/AP3M2/BORCS5/CNIH2/MAP2
BP	GO:0099517	synaptic vesicle transport along microtubule	19	-0.770046	-1.5048	0.0381786	0.526722	0.508247	1506	tags=53%, list=12%, signal=46%	BLOC1S5/BLOC1S6/DTNBP1/SNAPIN/BLOC1S3/BLOC1S2/AP3M2/BORCS5/CNIH2/MAP2
BP	GO:0090023	positive regulation of neutrophil chemotaxis	18	-0.798193	-1.54173	0.0382539	0.526776	0.508299	1248	tags=50%, list=10%, signal=45%	LBP/EDN1/CXCL8/MOSPD2/TIRAP/RAC2/C5AR1/NCKAP1L/CCR7
MF	GO:0032813	tumor necrosis factor receptor superfamily binding	33	-0.691868	-1.44702	0.0387521	0.531643	0.512995	1347	tags=33%, list=11%, signal=30%	TNF/EDA/TNFSF10/CFLAR/DAB2IP/LTA/BDNF/TRAF2/TNFSF13B/FASLG/TNFSF12
BP	GO:0008286	insulin receptor signaling pathway	117	0.579605	1.45952	0.0388538	0.531643	0.512995	1123	tags=9%, list=9%, signal=9%	INS/TNS2/IGFBP1/CSRP3/SLC39A14/BCAR3/PHIP/SRC/SOGA1/INSR/TSC2
BP	GO:0033197	response to vitamin E	10	-0.845442	-1.48791	0.0389366	0.531643	0.512995	1080	tags=30%, list=8%, signal=27%	COL1A1/FKBP1B/ADA
BP	GO:0090177	establishment of planar polarity involved in neural tube closure	10	-0.845334	-1.48772	0.0389366	0.531643	0.512995	721	tags=30%, list=6%, signal=28%	DVL2/WNT5A/CTHRC1
MF	GO:0051393	alpha-actinin binding	23	0.74817	1.49376	0.0389674	0.531643	0.512995	2279	tags=48%, list=18%, signal=39%	CACNA1C/PDLIM4/MYOT/LDB3/PTPRT/PDLIM5/ADORA2A/TTN/MAGI1/MYPN/LRRC10
BP	GO:0048644	muscle organ morphogenesis	60	0.65007	1.50349	0.0390902	0.532334	0.513662	1116	tags=25%, list=9%, signal=23%	LRP2/TGFBR1/DSP/ISL1/MYBPC3/RYR2/FGFR2/MYLK/TNNC1/TGFB2/NOTCH1/PROX1/ARID5B/ZFPM1/CHD7
MF	GO:0051019	mitogen-activated protein kinase binding	31	0.714929	1.52842	0.0392606	0.533669	0.51495	1230	tags=16%, list=10%, signal=15%	DUSP4/PTPRJ/PPM1D/DUSP7/ACE
MF	GO:0030594	neurotransmitter receptor activity	77	-0.613169	-1.47112	0.039594	0.537212	0.518369	954	tags=19%, list=8%, signal=18%	GRIK4/GABRR2/GRID2/GABRB1/DRD2/ADRB1/GRIN1/GRIK2/CHRNA9/GRIA2/GABRR1/GABRG3/P2RY11/GABRD/GRIN2C
BP	GO:0009620	response to fungus	19	-0.767426	-1.49968	0.0399543	0.540712	0.521746	997	tags=16%, list=8%, signal=15%	JAGN1/SYK/HAMP
BP	GO:0045981	positive regulation of nucleotide metabolic process	35	0.712511	1.54644	0.0400718	0.540712	0.521746	1081	tags=17%, list=9%, signal=16%	INS/GUCA2A/PPARGC1A/GUCA1B/HIF1A/INSR
BP	GO:1900544	positive regulation of purine nucleotide metabolic process	35	0.712511	1.54644	0.0400718	0.540712	0.521746	1081	tags=17%, list=9%, signal=16%	INS/GUCA2A/PPARGC1A/GUCA1B/HIF1A/INSR
BP	GO:0021532	neural tube patterning	30	0.721128	1.52911	0.0403147	0.542998	0.523952	299	tags=7%, list=2%, signal=7%	TBC1D32/LRP6
BP	GO:0043970	histone H3-K9 acetylation	11	0.841977	1.50083	0.0409171	0.550108	0.530813	711	tags=27%, list=6%, signal=26%	CRTC2/KMT2A/SPHK2
BP	GO:0045779	negative regulation of bone resorption	13	-0.833361	-1.51237	0.0413007	0.554256	0.534815	1478	tags=54%, list=12%, signal=48%	CD38/TNFRSF11B/CSK/TMEM119/CALCA/INPP5D/HAMP
BP	GO:0051580	regulation of neurotransmitter uptake	14	-0.812167	-1.48661	0.041648	0.557902	0.538334	1091	tags=43%, list=9%, signal=39%	PER2/SNCA/DRD2/TOR1A/GDNF/ITGB3
BP	GO:0035023	regulation of Rho protein signal transduction	67	-0.611619	-1.43486	0.0418862	0.560076	0.54043	1958	tags=24%, list=15%, signal=20%	CUL3/APOA1/STMN1/RASGRF2/EPS8L3/ARHGEF3/RTN4R/BCL6/ARHGEF2/F2RL2/GPR174/ROBO1/P2RY8/NET1/APOE/GPR18
BP	GO:0044342	type B pancreatic cell proliferation	16	0.803824	1.52925	0.0421448	0.562516	0.542785	1249	tags=25%, list=10%, signal=23%	NR4A1/NR1D1/NR4A3/PTPRN
BP	GO:0042742	defense response to bacterium	110	-0.576725	-1.44143	0.0430722	0.571918	0.551857	1228	tags=25%, list=10%, signal=22%	TLR3/LTA/MR1/GRN/AQP1/TBK1/HLA-A/SLAMF8/TIRAP/CYBA/HAVCR2/PLA2G1B/SELP/IL17F/C5AR1/LYG2/CRP/PGLYRP2/SYK/TLR9/CFP/LYZ/IRF8/OCIAD2/HAMP/MPEG1/LEAP2
BP	GO:0034368	protein-lipid complex remodeling	21	-0.772671	-1.52946	0.0430817	0.571918	0.551857	52	tags=29%, list=0%, signal=29%	APOA1/APOB/PLTP/LCAT/APOE/APOA4
BP	GO:0034369	plasma lipoprotein particle remodeling	21	-0.772671	-1.52946	0.0430817	0.571918	0.551857	52	tags=29%, list=0%, signal=29%	APOA1/APOB/PLTP/LCAT/APOE/APOA4
BP	GO:0060749	mammary gland alveolus development	16	0.802689	1.52709	0.0433404	0.57241	0.552332	1596	tags=31%, list=13%, signal=27%	TPH1/SOCS2/HIF1A/PHB2/ERBB4
BP	GO:0061377	mammary gland lobule development	16	0.802689	1.52709	0.0433404	0.57241	0.552332	1596	tags=31%, list=13%, signal=27%	TPH1/SOCS2/HIF1A/PHB2/ERBB4
BP	GO:0031954	positive regulation of protein autophosphorylation	21	0.796128	1.55044	0.0433514	0.57241	0.552332	5	tags=5%, list=0%, signal=5%	INS
BP	GO:0009415	response to water	11	0.840436	1.49808	0.0434546	0.572747	0.552658	1202	tags=27%, list=9%, signal=25%	TH/UMOD/ATP2B4
BP	GO:1902003	regulation of amyloid-beta formation	28	-0.713122	-1.46262	0.0436005	0.573645	0.553524	406	tags=14%, list=3%, signal=14%	RTN3/NTRK2/CLU/APOE
BP	GO:0071887	leukocyte apoptotic process	73	-0.608821	-1.45299	0.0437118	0.573799	0.553672	1358	tags=21%, list=11%, signal=18%	TSC22D3/PRKCQ/BCL6/CD27/HCAR2/ADAM8/WNT5A/BLK/PIK3CD/AURKB/SLC46A2/ADA/FASLG/CCR7/CD274
BP	GO:0019318	hexose metabolic process	202	0.529255	1.41628	0.0437676	0.573799	0.553672	1200	tags=14%, list=9%, signal=13%	GCG/INS/PDX1/PGAM2/ATF3/FAM3C/CRTC2/PC/SIRT7/ACACB/PDK1/PGK1/PPARGC1A/NCOA2/SLC39A14/NISCH/ONECUT1/PASK/SIK1/NKX1-1/SRC/CPT1A/SOGA1/APOD/INSR/FUT5/PGAM1/PMM1/DYRK2
BP	GO:0045059	positive thymic T cell selection	12	-0.832025	-1.50682	0.0441516	0.576652	0.556425	316	tags=50%, list=2%, signal=49%	SHH/DOCK2/ZAP70/PTPRC/CD3E/CD3D
BP	GO:1903975	regulation of glial cell migration	12	-0.831727	-1.50628	0.0441516	0.576652	0.556425	1344	tags=42%, list=11%, signal=37%	P2RY12/GPR183/CERS2/CSF1/CCL3
BP	GO:0002065	columnar/cuboidal epithelial cell differentiation	68	0.634547	1.50186	0.0442196	0.576652	0.556425	1041	tags=18%, list=8%, signal=16%	PAX6/PDX1/NPY/RFX6/FGFR2/NEUROD1/WNT11/INSM1/NOTCH1/PROX1/SRC/HIF1A
BP	GO:0062013	positive regulation of small molecule metabolic process	109	0.580707	1.44636	0.0447623	0.582699	0.562261	1082	tags=14%, list=9%, signal=13%	GCG/INS/GUCA2A/SCAP/ABCD2/PPARGC1A/LPGAT1/SRC/NR1D1/NR4A3/GUCA1B/CPT1A/HIF1A/INSR/FABP1
BP	GO:0006027	glycosaminoglycan catabolic process	51	-0.649436	-1.47359	0.0448833	0.583072	0.56262	1394	tags=41%, list=11%, signal=37%	GPC6/DCN/GNS/BGN/PGLYRP1/ARSB/SGSH/SPAM1/HEXB/SLC9A1/CSPG5/CHP1/HYAL3/PRELP/LYG2/HPSE2/IDS/GLB1/PGLYRP2/NCAN/HSPG2
BP	GO:1904036	negative regulation of epithelial cell apoptotic process	37	0.693076	1.52547	0.0449489	0.583072	0.56262	411	tags=16%, list=3%, signal=16%	ANGPTL4/PDX1/NEUROD1/SEMA5A/HMOX1/PAK4
BP	GO:0000086	G2/M transition of mitotic cell cycle	226	-0.486908	-1.32255	0.0452899	0.584142	0.563652	1181	tags=13%, list=9%, signal=12%	TUBG1/FOXM1/BRSK1/FBXL22/CDC6/CDK2/HAUS4/TPX2/PSMB6/DONSON/PLK4/AURKA/AURKB/CENPJ/FBXL15/CCNB3/VPS4A/ORC1/NEK2/PRKAR2B/CCNA2/PSMB9/PSMB7/GPR132/PSME2/PSMB8/ESRRB/CCNB1/MELK
BP	GO:0090136	epithelial cell-cell adhesion	14	0.815054	1.52513	0.0454394	0.584142	0.563652	628	tags=36%, list=5%, signal=34%	DSP/CYP1B1/VCL/KIFC3/ITGB5
MF	GO:0099094	ligand-gated cation channel activity	84	-0.575333	-1.39344	0.0456204	0.584142	0.563652	1080	tags=14%, list=8%, signal=13%	FKBP1B/ASIC2/KCNJ12/GRIK4/AQP1/CNGA3/GRIN1/GRIK2/CHRNA9/GRIA2/KCNJ2/GRIN2C
BP	GO:0090026	positive regulation of monocyte chemotaxis	12	-0.830104	-1.50334	0.045883	0.584142	0.563652	473	tags=50%, list=4%, signal=48%	S100A14/MOSPD2/CCR1/CXCL10/LGMN/AIF1
CC	GO:0031227	intrinsic component of endoplasmic reticulum membrane	126	-0.544134	-1.39053	0.0459364	0.584142	0.563652	1551	tags=16%, list=12%, signal=14%	TRAM2/SPPL2A/SLC27A2/DPM2/TAP2/AUP1/DHCR7/STIM1/BCAP31/TEX261/HLA-A/HACD2/B2M/TECR/HLA-G/HLA-DPA1/SGMS2/DGAT2/HLA-DPB1/SCD
BP	GO:0048872	homeostasis of number of cells	196	-0.501547	-1.33955	0.0459559	0.584142	0.563652	1337	tags=18%, list=11%, signal=17%	GPR183/FOXA3/BCL6/INHBA/KRAS/CCR4/FLVCR1/TAL1/MAFB/HCAR2/GPR174/KLF1/GATA2/RB1/DMTN/TMEM14C/FANCC/DNASE2/MED1/B2M/PIK3CD/SLC46A2/IKZF1/SLC4A1/MAEA/ADA/TNFSF13B/SASH3/INPP5D/CSF1/NCKAP1L/KLF13/SPI1/CCR7/ALAS2/HAMP
BP	GO:0046434	organophosphate catabolic process	128	-0.544006	-1.39321	0.0460177	0.584142	0.563652	597	tags=7%, list=5%, signal=7%	PDE7A/NUDT7/NT5C2/PRDX6/ADA/BPNT1/SARM1/ABHD6/ENTPD3
BP	GO:0006446	regulation of translational initiation	67	0.648447	1.53366	0.0460845	0.584142	0.563652	2361	tags=30%, list=19%, signal=24%	EIF3H/RPL13A/EIF2AK3/CSDE1/EIF3B/HSPB1/EIF2S1/DDX1/KHDRBS1/EIF4G1/MTIF2/RPS6KB2/IMPACT/EIF2AK4/EIF3E/PPP1R15B/RBM4/TPR/MTOR/EIF4EBP3
BP	GO:0031347	regulation of defense response	435	-0.434945	-1.24691	0.0460993	0.584142	0.563652	1086	tags=14%, list=9%, signal=13%	USP18/SIRPA/PROC/CMA1/CD200R1/GRN/FANCD2/SNCA/ADAM8/CEBPA/TBK1/CRH/CRTAM/PSMB6/HLA-A/SLAMF8/TIRAP/RB1/CNR2/SEMA7A/CYBA/DRD2/CD200/HAVCR2/MCPH1/WNT5A/SH2D1A/VPS35/MED1/IL1RL1/HLA-G/C1QTNF3/CTSC/RASGRP1/SLAMF6/PBK/VAV1/TLR7/PSMB9/PSMB7/SAA1/ADCYAP1/PTPRC/A2M/IRF1/PGLYRP2/ADA/SYK/TLR9/PSME2/SERPING1/PSMB8/PTGER4/CLEC10A/CCR7/CCL3/SH2D1B/APOE/CLNK/TNFRSF1B/HAMP/CLEC4D
CC	GO:0035577	azurophil granule membrane	44	-0.664704	-1.45787	0.0462107	0.584142	0.563652	2687	tags=43%, list=21%, signal=34%	NDUFC2/RAB5C/VAPA/NCSTN/SNAP29/DNAJC5/RAP1B/SYNGR1/CEACAM6/LAMP1/PIGR/GAA/BRI3/B4GALT1/LAMP2/CD63/GLIPR1/PRCP/PSAP
BP	GO:1902850	microtubule cytoskeleton organization involved in mitosis	123	-0.546064	-1.38654	0.0462633	0.584142	0.563652	2150	tags=27%, list=17%, signal=23%	MISP/CCSAP/MAP9/MAD2L1/RHOA/NDC80/STMN1/PLK1/KIF11/MAP10/DLGAP5/KIF23/GNAI1/PARP3/TUBG1/CEP126/STAG1/FSD1/SPICE1/TPX2/NUMA1/NUF2/MCPH1/AURKA/AURKB/CDC20/MYBL2/NUSAP1/NEK2/PRC1/PKD1/CCNB1/EML1
BP	GO:0046323	glucose import	51	0.663291	1.49394	0.0462865	0.584142	0.563652	5	tags=2%, list=0%, signal=2%	INS
CC	GO:0030176	integral component of endoplasmic reticulum membrane	122	-0.546042	-1.38434	0.0463458	0.584142	0.563652	1551	tags=16%, list=12%, signal=15%	TRAM2/SPPL2A/SLC27A2/DPM2/TAP2/AUP1/DHCR7/STIM1/BCAP31/TEX261/HLA-A/HACD2/B2M/TECR/HLA-G/HLA-DPA1/SGMS2/DGAT2/HLA-DPB1/SCD
BP	GO:0032677	regulation of interleukin-8 production	55	-0.63942	-1.46233	0.046595	0.584142	0.563652	781	tags=22%, list=6%, signal=21%	TLR3/TIRAP/WNT5A/PLA2G1B/CD2/IL17F/TLR1/CRP/TLR7/PTPRC/SYK/TLR9
BP	GO:0034404	nucleobase-containing small molecule biosynthetic process	98	-0.571465	-1.41095	0.0466127	0.584142	0.563652	597	tags=8%, list=5%, signal=8%	PDE7A/NUDT7/UCKL1/NT5C2/TK1/ADA/SARM1/ENTPD3
BP	GO:0071402	cellular response to lipoprotein particle stimulus	26	-0.719306	-1.44085	0.0466166	0.584142	0.563652	800	tags=19%, list=6%, signal=18%	CDH13/ADTRP/SYK/ITGB2/APOE
MF	GO:0019957	C-C chemokine binding	13	-0.82819	-1.50298	0.0466489	0.584142	0.563652	1481	tags=46%, list=12%, signal=41%	CXCR4/CCR4/XCR1/CCR1/CXCR3/CCR7
CC	GO:1902495	transmembrane transporter complex	246	-0.4831	-1.32806	0.0468468	0.584142	0.563652	1122	tags=15%, list=9%, signal=14%	OLFM2/FKBP1B/CACNA1S/AMIGO1/ATP1A1/KCNAB2/LRRC52/MICU1/GRIK4/SLC9A1/GABRR2/MICU2/GRID2/KCNIP3/GABRB1/CTTN/CNGA3/SCN8A/GRIN1/GRIK2/TTYH3/SNAP25/CHRNA9/KCNIP2/GRIA2/PKD1/GABRR1/CLCN1/SHISA9/ATP1B4/CNIH2/GABRG3/GABRD/CACNA2D3/KCNJ2/ABHD6/GRIN2C
BP	GO:0006333	chromatin assembly or disassembly	111	-0.544556	-1.36207	0.0469314	0.584142	0.563652	1387	tags=14%, list=11%, signal=13%	MCM2/UBN1/HELLS/TAL1/HIRIP3/ASF1A/CENPK/CENPQ/CENPI/CENPT/CHAF1A/SMARCA4/PPHLN1/CENPN/MIS18A/CENPP
BP	GO:0046916	cellular transition metal ion homeostasis	80	-0.58402	-1.40354	0.0470528	0.584142	0.563652	1841	tags=25%, list=14%, signal=22%	SCARA5/SOD1/NDFIP1/SLC46A1/ATOX1/CYBRD1/COX19/TMPRSS6/ATP6AP1/SLC1A1/CCDC115/FLVCR1/CP/CCDC22/TFRC/SLC30A4/SLC31A2/ALAS2/HAMP/SLC30A1
BP	GO:0034433	steroid esterification	11	-0.820741	-1.47597	0.0473485	0.584142	0.563652	52	tags=27%, list=0%, signal=27%	LCAT/APOE/APOA4
BP	GO:0034434	sterol esterification	11	-0.820741	-1.47597	0.0473485	0.584142	0.563652	52	tags=27%, list=0%, signal=27%	LCAT/APOE/APOA4
BP	GO:0034435	cholesterol esterification	11	-0.820741	-1.47597	0.0473485	0.584142	0.563652	52	tags=27%, list=0%, signal=27%	LCAT/APOE/APOA4
MF	GO:0000400	four-way junction DNA binding	15	-0.814626	-1.51852	0.0474307	0.584142	0.563652	160	tags=13%, list=1%, signal=13%	YY1/GEN1
BP	GO:2001138	regulation of phospholipid transport	12	-0.829786	-1.50277	0.0476144	0.584142	0.563652	164	tags=25%, list=1%, signal=25%	APOA1/FASLG/APOE
BP	GO:0018158	protein oxidation	12	-0.807059	-1.46161	0.0479846	0.584142	0.563652	1931	tags=58%, list=15%, signal=50%	APOA1/TMX3/GPX1/LOXL3/LOXL4/SUMF1/TRABD2B
BP	GO:0046849	bone remodeling	73	-0.594261	-1.41824	0.0481481	0.584142	0.563652	1568	tags=27%, list=12%, signal=24%	LRRK1/ATP6AP1/MITF/CD38/TNFRSF11B/CSK/ADAM8/TGFB3/TFRC/RAC2/SIGLEC15/CTHRC1/TMEM119/SYK/CALCA/CA2/INPP5D/ITGB3/CSF1R/HAMP
CC	GO:0031225	anchored component of membrane	100	-0.551043	-1.36709	0.0482143	0.584142	0.563652	800	tags=15%, list=6%, signal=14%	NCAM1/SPAM1/TNFRSF10C/CD55/CDH13/SYN1/SEMA7A/CD48/PLAUR/CD2/GP1BA/GLIPR1L1/MDGA2/IGSF21/CNTFR
MF	GO:0031369	translation initiation factor binding	28	0.72051	1.51056	0.0482186	0.584142	0.563652	1471	tags=21%, list=12%, signal=19%	ANGEL1/EIF3C/EIF3B/RPS24/EIF3M/EIF4G1
BP	GO:0038061	NIK/NF-kappaB signaling	132	-0.533377	-1.36995	0.0485612	0.584142	0.563652	822	tags=13%, list=6%, signal=12%	CD27/TLR3/PSMB6/TIRAP/CARD14/HAVCR2/RBCK1/RTKN2/TRAF2/C1QTNF3/TLR7/PSMB9/PSMB7/ADGRG3/TLR9/PSME2/PSMB8
BP	GO:0060079	excitatory postsynaptic potential	89	-0.567195	-1.3873	0.0486486	0.584142	0.563652	750	tags=10%, list=6%, signal=10%	GRID2/DRD2/GRIN1/GRIK2/CBLN1/CHRNA9/STX1B/SLC29A1/GRIN2C
BP	GO:0061041	regulation of wound healing	105	-0.549627	-1.3666	0.0487365	0.584142	0.563652	1114	tags=21%, list=9%, signal=19%	KNG1/EDN1/PDGFB/NFE2L2/CXCR4/FGG/VTN/THBS1/PROC/CADM4/CPB2/XBP1/DMTN/TSPAN8/PLAUR/GP1BA/ADTRP/PLAU/ADRA2A/SERPING1/APOE/F11
MF	GO:0098960	postsynaptic neurotransmitter receptor activity	50	-0.635878	-1.4343	0.048913	0.584142	0.563652	954	tags=22%, list=8%, signal=20%	GRIK4/GABRR2/GRID2/GABRB1/DRD2/ADRB1/GRIK2/CHRNA9/GABRR1/GABRG3/GRIN2C
BP	GO:0002449	lymphocyte mediated immunity	147	-0.546146	-1.41923	0.0489308	0.584142	0.563652	1427	tags=29%, list=11%, signal=26%	IGLL1/FUT7/LAMP1/BCL6/CD27/ICAM1/LTA/PARP3/UNG/JAG1/MR1/MLH1/CD55/SMAD7/C4BPA/CRTAM/HLA-A/TFRC/HAVCR2/SH2D1A/B2M/RNF19B/TRAF2/HLA-G/CTSC/RASGRP1/SLAMF6/VAV1/SWAP70/CRP/CFI/CLU/PTPRC/WAS/SASH3/SERPING1/C1QA/INPP5D/C1QC/SH2D1B/CLNK/TNFRSF1B
BP	GO:0030225	macrophage differentiation	34	-0.676469	-1.41086	0.0490196	0.584142	0.563652	893	tags=26%, list=7%, signal=25%	NRROS/CEBPA/GATA2/RB1/ZBTB46/CSF1/C1QC/SPI1/CSF1R
BP	GO:0001821	histamine secretion	10	-0.835706	-1.47077	0.049168	0.584142	0.563652	296	tags=30%, list=2%, signal=29%	EDN1/ADCYAP1/ADA
BP	GO:0006878	cellular copper ion homeostasis	11	-0.81401	-1.46387	0.0492424	0.584142	0.563652	1674	tags=36%, list=13%, signal=32%	ATOX1/COX19/CCDC22/SLC31A2
BP	GO:0010745	negative regulation of macrophage derived foam cell differentiation	11	-0.820296	-1.47517	0.0492424	0.584142	0.563652	1331	tags=27%, list=10%, signal=24%	PPARA/CRP/ITGB3
BP	GO:0046641	positive regulation of alpha-beta T cell proliferation	11	-0.811331	-1.45905	0.0492424	0.584142	0.563652	994	tags=64%, list=8%, signal=59%	EBI3/CD55/HLA-A/ZAP70/PTPRC/SYK/CD3E
BP	GO:1990440	positive regulation of transcription from RNA polymerase II promoter in response to endoplasmic reticulum stress	10	0.854462	1.50731	0.0492678	0.584142	0.563652	661	tags=20%, list=5%, signal=19%	ATF3/DDIT3
BP	GO:0051383	kinetochore organization	18	-0.758764	-1.46557	0.0493097	0.584142	0.563652	2242	tags=44%, list=18%, signal=37%	SMC2/NDC80/CDT1/DLGAP5/CENPK/CENPT/NUF2/CENPN
BP	GO:0030490	maturation of SSU-rRNA	47	0.685401	1.51567	0.0493218	0.584142	0.563652	1046	tags=19%, list=8%, signal=18%	RPS21/RPS19/RPS16/RPS8/RPS14/UTP20/HEATR1/RPS28/RCL1
BP	GO:0046851	negative regulation of bone remodeling	14	-0.808582	-1.48005	0.0493277	0.584142	0.563652	1478	tags=50%, list=12%, signal=44%	CD38/TNFRSF11B/CSK/TMEM119/CALCA/INPP5D/HAMP
BP	GO:0006590	thyroid hormone generation	17	-0.767974	-1.47154	0.0496032	0.584142	0.563652	613	tags=35%, list=5%, signal=34%	MED1/SLC16A10/TG/CPQ/TPO/CTSK
BP	GO:0045724	positive regulation of cilium assembly	17	0.79522	1.52058	0.0498135	0.584142	0.563652	2305	tags=65%, list=18%, signal=53%	CEP135/DZIP1/KCTD17/MNS1/CROCC/CCP110/HTT/FUZ/CCDC88A/TAPT1/MARK4
MF	GO:0102545	phosphatidyl phospholipase B activity	10	0.853187	1.50506	0.0499035	0.584142	0.563652	330	tags=20%, list=3%, signal=19%	ASPG/PLB1
MF	GO:0048306	calcium-dependent protein binding	53	-0.634414	-1.43867	0.0503597	0.584142	0.563652	2013	tags=38%, list=16%, signal=32%	S100P/S100A13/STMN2/ALG2/S100A14/CASQ2/MYO1D/CLEC4M/TNNT3/CABP1/SLC9A1/SYN1/CHP1/SELP/S100A6/SNAP25/A2M/PEF1/STX2/ANXA2
BP	GO:1903034	regulation of response to wounding	132	-0.526064	-1.35117	0.0503597	0.584142	0.563652	1114	tags=15%, list=9%, signal=14%	THBS1/FKBP1B/PROC/GRN/CADM4/CERS2/CPB2/XBP1/DMTN/TSPAN8/PLAUR/GP1BA/ADTRP/PTPRS/PLAU/ADRA2A/SERPING1/MAP2K1/APOE/F11
BP	GO:0002183	cytoplasmic translational initiation	32	0.691521	1.48311	0.0505237	0.584142	0.563652	2781	tags=53%, list=22%, signal=42%	EIF3H/EIF3C/RPL13A/EIF3B/EIF3A/EIF2S3/EIF4A1/EIF3M/EIF4G1/EIF3I/EIF3E/RBM4/MTOR/EIF3G/EIF3F/EIF3L/EIF3D
CC	GO:0034702	ion channel complex	230	-0.480295	-1.30838	0.0505415	0.584142	0.563652	1532	tags=18%, list=12%, signal=16%	KCNIP1/CNGB1/ORAI1/UNC80/GABRA6/KCNB2/CHRNA1/GABRG2/DLG2/OLFM2/FKBP1B/CACNA1S/AMIGO1/KCNAB2/LRRC52/MICU1/GRIK4/GABRR2/MICU2/GRID2/KCNIP3/GABRB1/CTTN/SCN8A/GRIN1/GRIK2/TTYH3/SNAP25/CHRNA9/KCNIP2/GRIA2/PKD1/GABRR1/CLCN1/SHISA9/CNIH2/GABRG3/GABRD/CACNA2D3/KCNJ2/ABHD6/GRIN2C
BP	GO:0006970	response to osmotic stress	67	0.643103	1.52102	0.0506602	0.584142	0.563652	1145	tags=21%, list=9%, signal=19%	TRPV4/SST/TH/MYLK/MAP2K7/SLC12A2/SCN2A/PAPPA2/ITGA2/HSP90AB1/CLDN1/RELB/HNMT/LRRC8E
BP	GO:0044839	cell cycle G2/M phase transition	237	-0.482021	-1.31705	0.0507246	0.584142	0.563652	1903	tags=18%, list=15%, signal=15%	CDK1/BACH1/PSMA8/FBXO5/PKMYT1/ZFYVE19/PLK1/KCNH5/BABAM1/ATF5/NES/CDK14/NEK10/TUBG1/FOXM1/BRSK1/FBXL22/CDC6/CDK2/HAUS4/TPX2/PSMB6/DONSON/PLK4/AURKA/AURKB/CENPJ/FBXL15/CCNB3/VPS4A/ORC1/NEK2/PRKAR2B/CCNA2/PSMB9/PSMB7/GPR132/PSME2/PSMB8/ESRRB/CCNB1/MELK
CC	GO:0032281	AMPA glutamate receptor complex	23	-0.734734	-1.47034	0.0507812	0.584142	0.563652	397	tags=22%, list=3%, signal=21%	OLFM2/GRIA2/SHISA9/CNIH2/ABHD6
BP	GO:0001973	G protein-coupled adenosine receptor signaling pathway	11	-0.809829	-1.45635	0.0511364	0.584142	0.563652	1344	tags=45%, list=11%, signal=41%	P2RY12/P2RY1/ADORA3/ADA/ADCY5
BP	GO:0035588	G protein-coupled purinergic receptor signaling pathway	11	-0.809829	-1.45635	0.0511364	0.584142	0.563652	1344	tags=45%, list=11%, signal=41%	P2RY12/P2RY1/ADORA3/ADA/ADCY5
BP	GO:0033574	response to testosterone	36	0.688615	1.50374	0.0512544	0.584142	0.563652	355	tags=6%, list=3%, signal=5%	ELK1/PLN
BP	GO:0045922	negative regulation of fatty acid metabolic process	19	0.791907	1.5346	0.0514342	0.584142	0.563652	382	tags=11%, list=3%, signal=10%	INS/ACACB
BP	GO:1902099	regulation of metaphase/anaphase transition of cell cycle	59	-0.629212	-1.45816	0.0514625	0.584142	0.563652	2717	tags=41%, list=21%, signal=32%	MOS/LCMT1/PCID2/BUB1/KNTC1/CDC27/MAD2L1/NDC80/CDT1/CUL3/NEK6/DYNC1LI1/FBXO5/PLK1/BUB3/DLGAP5/CDC6/UBE2C/RB1/AURKB/CDC20/MAD2L1BP/GEN1/CCNB1
CC	GO:0000786	nucleosome	10	0.851129	1.50143	0.0518106	0.584142	0.563652	711	tags=20%, list=6%, signal=19%	KAT6B/SPHK2
MF	GO:0003951	NAD+ kinase activity	15	0.788338	1.48997	0.0522088	0.584142	0.563652	711	tags=27%, list=6%, signal=25%	CERKL/DGKA/CERK/SPHK2
BP	GO:0000478	endonucleolytic cleavage involved in rRNA processing	15	0.793329	1.49941	0.0522287	0.584142	0.563652	1046	tags=20%, list=8%, signal=18%	RPS21/UTP20/RCL1
BP	GO:0000479	endonucleolytic cleavage of tricistronic rRNA transcript (SSU-rRNA, 5.8S rRNA, LSU-rRNA)	15	0.793329	1.49941	0.0522287	0.584142	0.563652	1046	tags=20%, list=8%, signal=18%	RPS21/UTP20/RCL1
MF	GO:0008143	poly(A) binding	17	0.793106	1.51654	0.0522287	0.584142	0.563652	124	tags=12%, list=1%, signal=12%	PABPC4/RBMS2
BP	GO:0002244	hematopoietic progenitor cell differentiation	140	-0.514224	-1.33296	0.0522523	0.584142	0.563652	1273	tags=14%, list=10%, signal=12%	INHBA/AGPAT5/ESCO2/TAL1/GATA2/PSMB6/PLEK/FLT4/MYB/PSMB9/PSMB7/PTPRC/EEF2/PSME2/PSMB8/SPI1/CSF1R/RUNX1/OCIAD2
BP	GO:0071346	cellular response to interferon-gamma	102	-0.554015	-1.37505	0.0522824	0.584142	0.563652	1694	tags=27%, list=13%, signal=24%	STX8/CASP1/VIM/PDE12/RPS6KB1/ACTR2/ICAM1/TLR3/NCAM1/GSN/CAMK2B/SIRPA/CIITA/HLA-A/WNT5A/MED1/B2M/HLA-G/HLA-DPA1/FCGR1A/IRF1/WAS/FASLG/ASS1/HLA-DPB1/AIF1/IRF8/CCL3
BP	GO:2000107	negative regulation of leukocyte apoptotic process	33	-0.678711	-1.4195	0.0523256	0.584142	0.563652	1549	tags=24%, list=12%, signal=21%	TSC22D3/PRKCQ/BCL6/CD27/AURKB/SLC46A2/ADA/CCR7
MF	GO:0022843	voltage-gated cation channel activity	114	-0.535401	-1.34188	0.0523466	0.584142	0.563652	1051	tags=11%, list=8%, signal=11%	CACNA1S/KCNAB2/KCNK9/KCNJ12/LRRC52/CALHM1/GRIN1/SNAP25/KCNIP2/KCNH7/CACNA2D3/KCNJ2/GRIN2C
CC	GO:0005905	clathrin-coated pit	63	0.618177	1.438	0.0523678	0.584142	0.563652	1132	tags=16%, list=9%, signal=15%	AMN/LRP2/SGIP1/LDLR/EPN3/DAB2/ITSN2/AP1S3/AP2A2/SYNJ1
BP	GO:0030195	negative regulation of blood coagulation	40	-0.67486	-1.45624	0.0524345	0.584142	0.563652	1114	tags=30%, list=9%, signal=27%	VTN/THBS1/PROC/CPB2/TSPAN8/PLAUR/GP1BA/ADTRP/PLAU/SERPING1/APOE/F11
BP	GO:1900047	negative regulation of hemostasis	40	-0.67486	-1.45624	0.0524345	0.584142	0.563652	1114	tags=30%, list=9%, signal=27%	VTN/THBS1/PROC/CPB2/TSPAN8/PLAUR/GP1BA/ADTRP/PLAU/SERPING1/APOE/F11
BP	GO:0032496	response to lipopolysaccharide	209	-0.492303	-1.32803	0.0524412	0.584142	0.563652	1248	tags=21%, list=10%, signal=19%	EDN1/APOB/EPO/S100A14/CASP1/NFKBIL1/VIM/RPS6KB1/AKAP12/SRR/DAB2IP/CXCL8/ICAM1/LTA/CITED1/CXCL2/SIRPA/CD55/SNCA/XBP1/TIRAP/CNR2/PTGIR/HAVCR2/WNT5A/SELP/CYP1A1/C5AR1/IL36G/CD6/CXCL10/SIGIRR/IFNAR1/FASLG/ASS1/PTGER4/CCR7/CD274/CSF2RB/IRF8/CCL3/TNFRSF1B/HAMP
BP	GO:0050819	negative regulation of coagulation	41	-0.673866	-1.46211	0.0525328	0.584142	0.563652	1114	tags=29%, list=9%, signal=27%	VTN/THBS1/PROC/CPB2/TSPAN8/PLAUR/GP1BA/ADTRP/PLAU/SERPING1/APOE/F11
BP	GO:0009636	response to toxic substance	161	-0.505542	-1.32826	0.0526316	0.584142	0.563652	824	tags=14%, list=6%, signal=13%	OSCP1/FANCC/SLC22A5/GABRB1/DRD2/PON3/PRDX4/PRDX5/CYP1A1/HBZ/TXN/SLC30A4/PRDX6/TPO/ASS1/CCNB1/HBE1/CCL3/APOE/SLC30A1/SLC18A2/APOA4
BP	GO:0065004	protein-DNA complex assembly	138	-0.512127	-1.3213	0.0530165	0.584142	0.563652	2018	tags=21%, list=16%, signal=18%	CENPL/GTF2A2/CDT1/CENPV/MCM6/MCM5/CUL4A/RAD51/MCM3/GTF2H5/TERF1/DLGAP5/MCM2/UBN1/MCM4/HELLS/ASF1A/DMC1/CENPK/CENPQ/CENPI/RB1/CENPT/CHAF1A/SMARCA4/POLR1E/CENPN/MIS18A/CENPP
MF	GO:0042605	peptide antigen binding	14	-0.784238	-1.43549	0.0530452	0.584142	0.563652	1488	tags=64%, list=12%, signal=57%	TAP2/CLEC4M/SLC7A5/HLA-A/HLA-G/HLA-DPA1/DHCR24/SLC7A9/HLA-DPB1
BP	GO:0050817	coagulation	254	-0.474264	-1.3101	0.0531915	0.584142	0.563652	1358	tags=20%, list=11%, signal=18%	PRKCQ/P2RY12/VTN/PRKAR2A/PRSS56/CSRP1/GNAQ/PRKAR1B/SERPIND1/TYRO3/THBS1/PROC/BLOC1S3/C1GALT1C1/F9/TEC/TEC/CPB2/F2RL2/P2RY1/GATA2/PLEK/DMTN/PDPN/TSPAN8/PLAUR/BLK/SELP/PRCP/GP1BA/ADTRP/VAV1/PRKAR2B/PIK3R5/SAA1/A2M/PLAU/SLC4A1/IRF1/WAS/ADRA2A/SYK/SERPING1/LCP2/GP9/ITGB3/GP1BB/HBE1/APOE/F11
CC	GO:0099055	integral component of postsynaptic membrane	87	-0.56362	-1.36789	0.053407	0.584142	0.563652	954	tags=17%, list=8%, signal=16%	GRIK4/CSPG5/GRID2/NRP2/DRD2/SLITRK2/LRRC4B/CHRNA9/CLSTN1/PTPRS/SHISA9/CNIH2/SLITRK3/SLC30A1/ABHD6
BP	GO:0048246	macrophage chemotaxis	29	-0.701222	-1.44949	0.0534653	0.584142	0.563652	1426	tags=38%, list=11%, signal=34%	MIF/MST1/THBS1/CMKLR1/CKLF/SLAMF8/C5AR1/SAA1/CSF1/CCL3/CSF1R
BP	GO:1902175	regulation of oxidative stress-induced intrinsic apoptotic signaling pathway	22	0.751472	1.47303	0.0536082	0.584142	0.563652	597	tags=14%, list=5%, signal=13%	INS/HSPB1/P4HB
BP	GO:0046639	negative regulation of alpha-beta T cell differentiation	18	-0.776879	-1.50056	0.0536738	0.584142	0.563652	1721	tags=33%, list=14%, signal=29%	SHH/BCL6/LOXL3/SMAD7/RUNX3/RUNX1
MF	GO:0015125	bile acid transmembrane transporter activity	10	0.847633	1.49526	0.0537177	0.584142	0.563652	280	tags=30%, list=2%, signal=29%	SLC10A2/SLC10A1/SLCO1C1
BP	GO:0046349	amino sugar biosynthetic process	12	-0.803061	-1.45437	0.0537428	0.584142	0.563652	951	tags=25%, list=7%, signal=23%	PGM3/UAP1L1/AMDHD2
BP	GO:0099565	chemical synaptic transmission, postsynaptic	91	-0.56423	-1.37651	0.0537534	0.584142	0.563652	750	tags=10%, list=6%, signal=9%	GRID2/DRD2/GRIN1/GRIK2/CBLN1/CHRNA9/STX1B/SLC29A1/GRIN2C
BP	GO:0032637	interleukin-8 production	56	-0.630906	-1.44665	0.0537634	0.584142	0.563652	781	tags=20%, list=6%, signal=19%	TIRAP/WNT5A/PLA2G1B/CD2/IL17F/TLR1/CRP/TLR7/PTPRC/SYK/TLR9
CC	GO:1905369	endopeptidase complex	61	-0.620573	-1.44443	0.05386	0.584142	0.563652	822	tags=8%, list=6%, signal=8%	PSMB6/PSMB9/PSMB7/PSME2/PSMB8
BP	GO:0034104	negative regulation of tissue remodeling	15	-0.802744	-1.49637	0.0539933	0.584142	0.563652	1478	tags=47%, list=12%, signal=41%	CD38/TNFRSF11B/CSK/TMEM119/CALCA/INPP5D/HAMP
BP	GO:0046629	gamma-delta T cell activation	14	-0.799754	-1.46389	0.0540537	0.584142	0.563652	294	tags=29%, list=2%, signal=28%	PTPRC/SYK/NCKAP1L/ITK
BP	GO:0045841	negative regulation of mitotic metaphase/anaphase transition	37	-0.672942	-1.42431	0.0541586	0.584142	0.563652	2705	tags=43%, list=21%, signal=34%	LCMT1/PCID2/BUB1/KNTC1/MAD2L1/NDC80/CDT1/DYNC1LI1/FBXO5/PLK1/BUB3/AURKB/CDC20/MAD2L1BP/GEN1/CCNB1
CC	GO:0099699	integral component of synaptic membrane	113	-0.533747	-1.33613	0.0542495	0.584142	0.563652	1373	tags=20%, list=11%, signal=18%	CHRNA1/PCDH17/ADCY8/SLC1A6/GPM6A/GRIK4/P2RY1/CSPG5/GRID2/NRP2/DRD2/ATP2B1/SLITRK2/LRRC4B/CHRNA9/CLSTN1/PTPRS/SHISA9/CNIH2/GABRG3/SLITRK3/SLC30A1/ABHD6
BP	GO:0007094	mitotic spindle assembly checkpoint	35	-0.675147	-1.42306	0.0542755	0.584142	0.563652	2705	tags=43%, list=21%, signal=34%	LCMT1/PCID2/BUB1/KNTC1/MAD2L1/NDC80/CDT1/DYNC1LI1/PLK1/BUB3/AURKB/CDC20/MAD2L1BP/GEN1/CCNB1
BP	GO:0071173	spindle assembly checkpoint	35	-0.675147	-1.42306	0.0542755	0.584142	0.563652	2705	tags=43%, list=21%, signal=34%	LCMT1/PCID2/BUB1/KNTC1/MAD2L1/NDC80/CDT1/DYNC1LI1/PLK1/BUB3/AURKB/CDC20/MAD2L1BP/GEN1/CCNB1
BP	GO:0071174	mitotic spindle checkpoint	35	-0.675147	-1.42306	0.0542755	0.584142	0.563652	2705	tags=43%, list=21%, signal=34%	LCMT1/PCID2/BUB1/KNTC1/MAD2L1/NDC80/CDT1/DYNC1LI1/PLK1/BUB3/AURKB/CDC20/MAD2L1BP/GEN1/CCNB1
BP	GO:0051057	positive regulation of small GTPase mediated signal transduction	66	-0.610354	-1.4378	0.0543979	0.584142	0.563652	1346	tags=19%, list=11%, signal=17%	ARHGEF3/RTN4R/KRAS/F2RL2/GPR174/ROBO1/RASGRP1/VAV1/P2RY8/NET1/CSF1/EPOR/GPR18
CC	GO:0032994	protein-lipid complex	24	-0.727364	-1.45093	0.0544355	0.584142	0.563652	913	tags=25%, list=7%, signal=23%	LCAT/PCYOX1/SAA1/CLU/APOE/APOA4
CC	GO:0034358	plasma lipoprotein particle	21	-0.742846	-1.47042	0.0545809	0.584142	0.563652	913	tags=29%, list=7%, signal=27%	LCAT/PCYOX1/SAA1/CLU/APOE/APOA4
CC	GO:1990777	lipoprotein particle	21	-0.742846	-1.47042	0.0545809	0.584142	0.563652	913	tags=29%, list=7%, signal=27%	LCAT/PCYOX1/SAA1/CLU/APOE/APOA4
BP	GO:0034135	regulation of toll-like receptor 2 signaling pathway	10	-0.824743	-1.45148	0.0548204	0.584142	0.563652	781	tags=40%, list=6%, signal=38%	TLR6/TIRAP/CYBA/TLR1
BP	GO:0032635	interleukin-6 production	90	-0.580297	-1.41618	0.0549446	0.584142	0.563652	1228	tags=23%, list=10%, signal=21%	TLR3/CSK/SIRPA/CD200R1/ARHGEF2/XBP1/TIRAP/CYBA/CD200/HAVCR2/WNT5A/C1QTNF3/IL17F/TLR1/TLR7/ADCYAP1/SYK/TLR9/INPP5D/NCKAP1L/AIF1
BP	GO:0007596	blood coagulation	253	-0.474313	-1.30967	0.0549645	0.584142	0.563652	1358	tags=20%, list=11%, signal=18%	PRKCQ/P2RY12/VTN/PRKAR2A/PRSS56/CSRP1/GNAQ/PRKAR1B/SERPIND1/TYRO3/THBS1/PROC/BLOC1S3/C1GALT1C1/F9/TEC/TEC/CPB2/F2RL2/P2RY1/GATA2/PLEK/DMTN/PDPN/TSPAN8/PLAUR/BLK/SELP/PRCP/GP1BA/ADTRP/VAV1/PRKAR2B/PIK3R5/SAA1/A2M/PLAU/SLC4A1/IRF1/WAS/ADRA2A/SYK/SERPING1/LCP2/GP9/ITGB3/GP1BB/HBE1/APOE/F11
BP	GO:0051382	kinetochore assembly	13	-0.822668	-1.49296	0.0549684	0.584142	0.563652	1454	tags=31%, list=11%, signal=27%	DLGAP5/CENPK/CENPT/CENPN
BP	GO:0015697	quaternary ammonium group transport	10	0.845054	1.49071	0.0549892	0.584142	0.563652	17	tags=10%, list=0%, signal=10%	PDZK1
MF	GO:0001614	purinergic nucleotide receptor activity	17	-0.774452	-1.48395	0.0551865	0.584142	0.563652	1344	tags=29%, list=11%, signal=26%	P2RY12/P2RY1/P2RY6/P2RY8/P2RY11
MF	GO:0016502	nucleotide receptor activity	17	-0.774452	-1.48395	0.0551865	0.584142	0.563652	1344	tags=29%, list=11%, signal=26%	P2RY12/P2RY1/P2RY6/P2RY8/P2RY11
BP	GO:0098754	detoxification	79	-0.574503	-1.37798	0.0552486	0.584142	0.563652	1306	tags=22%, list=10%, signal=19%	MGST3/GPX5/CYGB/GPX4/OSCP1/FANCC/SLC22A5/PRDX4/PRDX5/HBZ/TXN/PRDX6/TPO/HBE1/APOE/SLC30A1/APOA4
CC	GO:0000776	kinetochore	116	-0.536685	-1.34452	0.0556553	0.584142	0.563652	2382	tags=28%, list=19%, signal=23%	KNTC1/XPO1/NUP43/GPATCH11/DSN1/MAD2L1/NDC80/CDT1/FBXO28/CENPV/ORC2/DYNC1LI1/PLK1/CSNK1A1/BUB3/ANAPC16/PSEN2/ERCC6L/NUDCD2/SPC24/NUP37/KIF2C/CENPK/CENPQ/CENPI/CENPT/NUF2/SKA3/ZWILCH/AURKB/NEK2/CENPN/CCNB1
BP	GO:0021904	dorsal/ventral neural tube patterning	19	0.786656	1.52442	0.055695	0.584142	0.563652	16	tags=5%, list=0%, signal=5%	TBC1D32
BP	GO:0071295	cellular response to vitamin	25	0.723686	1.48849	0.0557769	0.584142	0.563652	368	tags=16%, list=3%, signal=16%	FOLR2/CYP24A1/CYP27B1/PHEX
BP	GO:0005996	monosaccharide metabolic process	218	0.522375	1.41152	0.0560538	0.584142	0.563652	1200	tags=14%, list=9%, signal=13%	GCG/INS/PDX1/PGAM2/ATF3/FAM3C/CRTC2/PC/SIRT7/ACACB/PDK1/PGK1/PPARGC1A/NCOA2/SLC39A14/NISCH/ONECUT1/PASK/SIK1/NKX1-1/XYLB/TKT/SRC/CPT1A/SOGA1/APOD/INSR/FUT5/PGAM1/PMM1/DYRK2
BP	GO:0050920	regulation of chemotaxis	168	-0.500911	-1.31984	0.0560579	0.584142	0.563652	1837	tags=25%, list=14%, signal=22%	SEMA4B/SEMA5B/EDN1/PDGFB/SEMA6B/AKIRIN1/S100A14/FGF1/CXCR4/MIF/SEMA3A/P2RY12/GPR183/PRSS56/CXCL8/MOSPD2/MST1/CCR4/THBS1/DUSP3/CMKLR1/ROBO1/CDH13/SLAMF8/TIRAP/SEMA7A/RAC2/WNT5A/PTPRO/CCR1/DSCAM/C5AR1/SWAP70/CXCL10/LGMN/CSF1/SEMA4G/NCKAP1L/AIF1/CCR7/CCL3/CSF1R
BP	GO:2000108	positive regulation of leukocyte apoptotic process	16	-0.77248	-1.45191	0.0561122	0.584142	0.563652	939	tags=38%, list=7%, signal=35%	HCAR2/ADAM8/WNT5A/BLK/PIK3CD/CD274
MF	GO:0005509	calcium ion binding	486	-0.417337	-1.21268	0.0561404	0.584142	0.563652	1383	tags=18%, list=11%, signal=17%	SRR/PRSS3/PCDH17/CIB2/PCDH11X/STIM1/CALB2/CDH18/NRXN1/SMOC1/PCDHA1/MEGF6/PCDH9/CABP1/DOC2A/SPOCK2/GSN/THBS1/FAT4/CALU/JAG1/PROC/PPP3R1/CABP4/PNLIPRP1/EFHD1/EFHB/F9/CD93/MICU1/ADGRV1/MICU2/SNCA/ADAM8/DLK2/NAALADL1/CABP7/HMCN2/CDH13/KCNIP3/CDH4/UMODL1/NPNT/CHP1/PLA2G1B/DSG2/SELP/SYT3/CRTAC1/VSNL1/PLA2G12A/LPCAT2/GRIN1/RASGRP1/S100A6/ASAH2/KCNIP2/CLSTN1/PLA2G12B/SWAP70/CRP/FKBP7/ADGRE5/IDS/PEF1/ANXA…
BP	GO:0072678	T cell migration	40	-0.668279	-1.44203	0.0561798	0.584142	0.563652	1461	tags=35%, list=11%, signal=31%	ECM1/MSN/GPR183/ICAM1/CD200R1/ADAM8/CD200/WNT5A/PIK3CD/CXCL10/ZAP70/CXCR3/AIF1/CCL3
MF	GO:0005164	tumor necrosis factor receptor binding	20	-0.750294	-1.47921	0.0562016	0.584142	0.563652	568	tags=45%, list=4%, signal=43%	TRAF4/TNF/EDA/TNFSF10/LTA/TRAF2/TNFSF13B/FASLG/TNFSF12
BP	GO:0015802	basic amino acid transport	15	0.783109	1.48009	0.0562249	0.584142	0.563652	767	tags=33%, list=6%, signal=31%	SLC22A2/SLC7A1/SLC7A3/SLC38A3/SLC47A1
MF	GO:0042800	histone methyltransferase activity (H3-K4 specific)	15	0.784178	1.48211	0.0562249	0.584142	0.563652	1065	tags=33%, list=8%, signal=31%	KMT2C/SETD1A/KMT2A/PRDM9/ASH1L
BP	GO:0050995	negative regulation of lipid catabolic process	17	0.776921	1.48559	0.0562249	0.584142	0.563652	382	tags=12%, list=3%, signal=11%	INS/ACACB
BP	GO:0070875	positive regulation of glycogen metabolic process	15	0.78623	1.48599	0.0562249	0.584142	0.563652	5	tags=7%, list=0%, signal=7%	INS
BP	GO:2000679	positive regulation of transcription regulatory region DNA binding	17	0.776268	1.48434	0.0562249	0.584142	0.563652	312	tags=18%, list=2%, signal=17%	PAX6/HAND2/NEUROD1
BP	GO:0062237	protein localization to postsynapse	39	-0.669712	-1.4393	0.0562852	0.584142	0.563652	475	tags=15%, list=4%, signal=15%	KIF5A/CPLX1/SNAP25/CLSTN1/STX1B/GRIN2C
BP	GO:1905517	macrophage migration	39	-0.67018	-1.44031	0.0562852	0.584142	0.563652	1426	tags=36%, list=11%, signal=32%	MIF/P2RY12/MST1/THBS1/CD200R1/CMKLR1/CKLF/SLAMF8/CD200/C5AR1/SAA1/CSF1/CCL3/CSF1R
BP	GO:0015695	organic cation transport	29	0.701911	1.47938	0.056338	0.584142	0.563652	767	tags=14%, list=6%, signal=13%	PDZK1/SLC22A2/SLC44A4/SLC47A1
MF	GO:0099604	ligand-gated calcium channel activity	24	-0.722668	-1.44156	0.0564516	0.584142	0.563652	3	tags=8%, list=0%, signal=8%	GRIN1/GRIN2C
BP	GO:0031330	negative regulation of cellular catabolic process	198	0.532457	1.42457	0.0565217	0.584142	0.563652	1808	tags=21%, list=14%, signal=18%	INS/IGF2BP1/EIF3H/CLEC16A/PDCL3/RPL11/ACACB/HMOX1/RPL23/NBAS/HGF/RBM24/LRRK2/RPS7/IL10/AXIN2/HSP90AB1/LRPPRC/FUS/PABPC1/PKP3/TSC2/SMG1/ATP2B4/DHX9/BMF/PTPN3/LAPTM4B/LRIG2/ANGEL2/EIF4G1/RIC1/TBC1D14/GIPC1/RPL5/NOCT/CIRBP/OGT/KDM4A/NRBP2/PIK3CG
MF	GO:0030545	receptor regulator activity	279	0.504155	1.38422	0.0566372	0.584142	0.563652	965	tags=14%, list=8%, signal=13%	GCG/INS/SST/NMB/FST/GUCA2A/AREG/WNT7A/IL17C/FLRT3/SEMA4C/NPY/CDC42EP2/GREM2/FAM3C/BMP1/SEMA5A/WNT9A/IL12B/HGF/BMP3/WNT11/RLN3/FGF5/CCL25/IL10/SEMA3C/LYPD6/CLCF1/VGF/MIA/TGFB2/MRAP2/ADM2/GPHA2/FAM3D/INHBB/FGF7/CRLF1
MF	GO:0004622	lysophospholipase activity	19	0.765214	1.48287	0.0566802	0.584142	0.563652	330	tags=11%, list=3%, signal=10%	ASPG/PLB1
BP	GO:0009267	cellular response to starvation	122	0.554037	1.39836	0.0566893	0.584142	0.563652	1076	tags=16%, list=8%, signal=14%	AOC1/ATF3/CLEC16A/MIOS/GCN1/SZT2/EIF2AK3/NUAK1/SEH1L/PPM1D/LRRK2/SLC38A3/SIK1/RPTOR/HSPA8/EIF2S1/INHBB/CPEB4/PRKAG2
MF	GO:0004993	G protein-coupled serotonin receptor activity	14	0.795258	1.48809	0.0567951	0.584142	0.563652	434	tags=21%, list=3%, signal=21%	HRH3/CHRM4/HTR4
BP	GO:0098664	G protein-coupled serotonin receptor signaling pathway	14	0.795258	1.48809	0.0567951	0.584142	0.563652	434	tags=21%, list=3%, signal=21%	HRH3/CHRM4/HTR4
MF	GO:0099589	serotonin receptor activity	14	0.795258	1.48809	0.0567951	0.584142	0.563652	434	tags=21%, list=3%, signal=21%	HRH3/CHRM4/HTR4
BP	GO:0016571	histone methylation	110	0.570825	1.4255	0.0568423	0.584142	0.563652	1745	tags=17%, list=14%, signal=15%	GCG/SIRT7/KMT2C/SETD1A/KMT2A/CREBBP/GFI1/KMT2E/RIF1/PRDM9/DYDC1/ASH1L/EHMT1/SUPT6H/PRDM4/PRDM5/NSD1/OGT/SETD2
BP	GO:0002223	stimulatory C-type lectin receptor signaling pathway	86	-0.556422	-1.34913	0.0569853	0.584142	0.563652	364	tags=8%, list=3%, signal=8%	PSMB9/PSMB7/SYK/PSME2/PSMB8/CLEC10A/CLEC4D
BP	GO:0009309	amine biosynthetic process	32	0.682965	1.46476	0.0570265	0.584142	0.563652	978	tags=22%, list=8%, signal=20%	DDC/TPH1/HAND2/TH/INSM1/TGFB2/ODC1
BP	GO:0042401	cellular biogenic amine biosynthetic process	32	0.682965	1.46476	0.0570265	0.584142	0.563652	978	tags=22%, list=8%, signal=20%	DDC/TPH1/HAND2/TH/INSM1/TGFB2/ODC1
BP	GO:1904350	regulation of protein catabolic process in the vacuole	10	0.827024	1.4589	0.0570825	0.584142	0.563652	400	tags=20%, list=3%, signal=19%	LRP2/LDLR
BP	GO:1901984	negative regulation of protein acetylation	18	-0.745993	-1.4409	0.0571992	0.584142	0.563652	1002	tags=28%, list=8%, signal=26%	HINT2/HDAC2/KLF15/SNCA/SPI1
BP	GO:1904893	negative regulation of receptor signaling pathway via STAT	24	0.72315	1.477	0.0573123	0.584142	0.563652	1756	tags=25%, list=14%, signal=22%	SOCS2/NEUROD1/PTPRD/PTPRT/PTPN2/PARP14
CC	GO:0000777	condensed chromosome kinetochore	87	-0.587808	-1.4266	0.0573196	0.584142	0.563652	2382	tags=32%, list=19%, signal=26%	KNTC1/NUP43/GPATCH11/DSN1/MAD2L1/NDC80/CDT1/FBXO28/CENPV/ORC2/DYNC1LI1/PLK1/CSNK1A1/BUB3/ANAPC16/ERCC6L/NUDCD2/SPC24/NUP37/KIF2C/CENPK/CENPT/NUF2/SKA3/ZWILCH/NEK2/CENPN/CCNB1
BP	GO:0003281	ventricular septum development	57	0.638832	1.46004	0.0573394	0.584142	0.563652	1360	tags=23%, list=11%, signal=20%	LRP2/TGFBR1/SLIT2/FGFR2/STRA6/WNT11/TGFB2/NOTCH1/PDE2A/PROX1/ZFPM1/SLIT3/TRIP11
BP	GO:0032755	positive regulation of interleukin-6 production	56	-0.62805	-1.4401	0.0573477	0.584142	0.563652	1228	tags=23%, list=10%, signal=21%	TLR3/ARHGEF2/XBP1/TIRAP/CYBA/WNT5A/IL17F/TLR1/TLR7/ADCYAP1/SYK/TLR9/AIF1
BP	GO:0015914	phospholipid transport	73	-0.576308	-1.3754	0.0574074	0.584142	0.563652	268	tags=8%, list=2%, signal=8%	SLC4A1/XKR5/ATP8B1/FASLG/APOE/APOA4
CC	GO:0031306	intrinsic component of mitochondrial outer membrane	17	-0.748992	-1.43517	0.0575397	0.584142	0.563652	485	tags=12%, list=4%, signal=11%	GDAP1/MGARP
BP	GO:0050999	regulation of nitric-oxide synthase activity	41	0.658877	1.4555	0.0575693	0.584142	0.563652	309	tags=7%, list=2%, signal=7%	INS/DDAH1/ACVR2A
BP	GO:0080182	histone H3-K4 trimethylation	16	0.782918	1.48948	0.0576541	0.584142	0.563652	1744	tags=31%, list=14%, signal=27%	SETD1A/KMT2A/KMT2E/PRDM9/OGT
BP	GO:0007599	hemostasis	257	-0.471443	-1.29891	0.0576577	0.584142	0.563652	1358	tags=19%, list=11%, signal=18%	PRKCQ/P2RY12/VTN/PRKAR2A/PRSS56/CSRP1/GNAQ/PRKAR1B/SERPIND1/TYRO3/THBS1/PROC/BLOC1S3/C1GALT1C1/F9/TEC/TEC/CPB2/F2RL2/P2RY1/GATA2/PLEK/DMTN/PDPN/TSPAN8/PLAUR/BLK/SELP/PRCP/GP1BA/ADTRP/VAV1/PRKAR2B/PIK3R5/SAA1/A2M/PLAU/SLC4A1/IRF1/WAS/ADRA2A/SYK/SERPING1/LCP2/GP9/ITGB3/GP1BB/HBE1/APOE/F11
BP	GO:0007019	microtubule depolymerization	37	0.666905	1.46787	0.057732	0.584142	0.563652	443	tags=11%, list=3%, signal=10%	TRPV4/TRIM54/KIF19/NCKAP5
BP	GO:1902882	regulation of response to oxidative stress	62	0.618026	1.43948	0.0577778	0.584142	0.563652	1041	tags=15%, list=8%, signal=13%	INS/HGF/GGT7/HSPB1/P4HB/LRRK2/IL10/NR4A3/HIF1A
BP	GO:1902992	negative regulation of amyloid precursor protein catabolic process	18	-0.772779	-1.49264	0.0578253	0.584142	0.563652	406	tags=22%, list=3%, signal=22%	RTN3/NTRK2/CLU/APOE
BP	GO:0009066	aspartate family amino acid metabolic process	43	-0.654127	-1.42864	0.0579439	0.584142	0.563652	2046	tags=23%, list=16%, signal=20%	ASNSD1/AASDHPPT/GNMT/ASNS/MTAP/MTRR/PHYKPL/ASRGL1/MAT1A/ASS1
BP	GO:0031670	cellular response to nutrient	37	0.676736	1.48951	0.0579684	0.584142	0.563652	587	tags=16%, list=5%, signal=16%	FOLR2/CYP24A1/CYP27B1/PHEX/HMOX1/NCOA1
CC	GO:0098936	intrinsic component of postsynaptic membrane	91	-0.552584	-1.3481	0.0580762	0.584142	0.563652	954	tags=16%, list=8%, signal=15%	GRIK4/CSPG5/GRID2/NRP2/DRD2/SLITRK2/LRRC4B/CHRNA9/CLSTN1/PTPRS/SHISA9/CNIH2/SLITRK3/SLC30A1/ABHD6
BP	GO:0060349	bone morphogenesis	73	0.600828	1.43159	0.0584416	0.584142	0.563652	1708	tags=27%, list=13%, signal=24%	TRPV4/FGFR2/NAB1/LRP6/ALPL/MEGF8/PAPPA2/AXIN2/MSX2/SP5/COL27A1/COL2A1/FGF18/PHOSPHO1/TRIP11/MEF2D/GNAS/FGF4/STC1/LRP5
BP	GO:0006779	porphyrin-containing compound biosynthetic process	24	-0.718379	-1.43301	0.0584677	0.584142	0.563652	1896	tags=21%, list=15%, signal=18%	SRRD/UROD/IBA57/TMEM14C/ALAS2
BP	GO:0033014	tetrapyrrole biosynthetic process	24	-0.718379	-1.43301	0.0584677	0.584142	0.563652	1896	tags=21%, list=15%, signal=18%	SRRD/UROD/IBA57/TMEM14C/ALAS2
BP	GO:1901881	positive regulation of protein depolymerization	13	0.804248	1.49128	0.0584677	0.584142	0.563652	795	tags=23%, list=6%, signal=22%	TRPV4/SEMA5A/ACTN2
CC	GO:0031526	brush border membrane	49	0.658727	1.47553	0.0585586	0.584142	0.563652	903	tags=18%, list=7%, signal=17%	PDZK1/AMN/LRP2/SLC6A19/PLB1/SLC26A6/HSP90AB1/SLC28A3/SLC5A6
BP	GO:1900151	regulation of nuclear-transcribed mRNA catabolic process, deadenylation-dependent decay	12	-0.822958	-1.4904	0.05858	0.584142	0.563652	23	tags=17%, list=0%, signal=17%	TOB1/NANOS2
BP	GO:1900153	positive regulation of nuclear-transcribed mRNA catabolic process, deadenylation-dependent decay	12	-0.822958	-1.4904	0.05858	0.584142	0.563652	23	tags=17%, list=0%, signal=17%	TOB1/NANOS2
BP	GO:0051583	dopamine uptake involved in synaptic transmission	10	-0.822832	-1.44812	0.0586011	0.584142	0.563652	883	tags=40%, list=7%, signal=37%	SNCA/DRD2/TOR1A/GDNF
BP	GO:0051934	catecholamine uptake involved in synaptic transmission	10	-0.822832	-1.44812	0.0586011	0.584142	0.563652	883	tags=40%, list=7%, signal=37%	SNCA/DRD2/TOR1A/GDNF
CC	GO:0000793	condensed chromosome	174	-0.49638	-1.3074	0.0586081	0.584142	0.563652	2514	tags=30%, list=20%, signal=25%	AGO3/BUB1/MKI67/SYCP2/KNTC1/SYCP3/P3H4/NUP43/SMC2/GPATCH11/DSN1/MAD2L1/NDC80/CDT1/FBXO28/CENPV/ORC2/DYNC1LI1/RAD51/PLK1/BRCA2/CSNK1A1/BUB3/ANAPC16/ERCC6L/BANF1/MLH3/NUDCD2/SPC24/NUP37/TUBG1/NCAPD2/STAG1/SMC5/SYCP1/MLH1/FANCD2/KIF2C/DMC1/CENPK/SYN1/CENPT/NUF2/TEX12/SKA3/ZWILCH/AURKB/NCAPD3/NEK2/SYCE1/CENPN/ESRRB/CCNB1
BP	GO:0003007	heart morphogenesis	198	0.524878	1.4043	0.0586957	0.584142	0.563652	1352	tags=19%, list=11%, signal=17%	LRP2/ADAMTS1/TGFBR1/HAND2/DSP/ISL1/SLIT2/TH/MYBPC3/RYR2/FGFR2/STIL/ADGRG6/TBX2/MEGF8/TNNC1/ASXL1/C2CD3/VANGL2/WNT11/AXIN2/SEMA3C/ZMIZ1/TGFB2/NOTCH1/PROX1/COL2A1/HIF1A/INSR/NOTCH2/ZFPM1/CHD7/NPY2R/EPHB4/SLIT3/PLXND1/PTCH1/HAND1
BP	GO:0032488	Cdc42 protein signal transduction	11	-0.806021	-1.4495	0.0587121	0.584142	0.563652	255	tags=36%, list=2%, signal=36%	APOA1/SHTN1/WAS/APOE
MF	GO:0033691	sialic acid binding	11	-0.805556	-1.44866	0.0587121	0.584142	0.563652	1984	tags=55%, list=16%, signal=46%	SIGLEC10/ST8SIA3/CD22/MAG/SELP/SIGLEC5
BP	GO:0032930	positive regulation of superoxide anion generation	14	-0.793857	-1.4531	0.0587796	0.584142	0.563652	381	tags=29%, list=3%, signal=28%	SOD1/CRP/SYK/ITGB2
BP	GO:0016572	histone phosphorylation	31	-0.688716	-1.42996	0.0590551	0.584142	0.563652	1180	tags=23%, list=9%, signal=21%	MST1/CDK2/HIPK4/AURKA/AURKB/CCNA2/CCNB1
BP	GO:0002717	positive regulation of natural killer cell mediated immunity	18	-0.743971	-1.437	0.0591716	0.584142	0.563652	845	tags=44%, list=7%, signal=42%	CRTAM/SH2D1A/HLA-G/RASGRP1/SLAMF6/VAV1/SH2D1B/CLNK
BP	GO:0010799	regulation of peptidyl-threonine phosphorylation	37	0.67556	1.48692	0.0592084	0.584142	0.563652	4	tags=3%, list=0%, signal=3%	GCG
BP	GO:0032801	receptor catabolic process	30	-0.695517	-1.44208	0.0592885	0.584142	0.563652	650	tags=13%, list=5%, signal=13%	MYLIP/ANXA2/LGMN/APOE
BP	GO:0051897	positive regulation of protein kinase B signaling	127	0.54656	1.38461	0.0593607	0.584142	0.563652	1156	tags=14%, list=9%, signal=13%	INS/KLB/LRP2/AREG/TGFBR1/PTPRJ/FGFR2/SEMA5A/HGF/HIP1/FGF5/HSP90AB1/SRC/FGF7/FGF18/INSR/PDGFRA/RICTOR
CC	GO:0030285	integral component of synaptic vesicle membrane	29	-0.694645	-1.43589	0.0594059	0.584142	0.563652	446	tags=24%, list=4%, signal=23%	LAMP1/SYNPR/TMEM163/PTPRS/SYPL1/PTPRN2/SLC17A7
BP	GO:0031629	synaptic vesicle fusion to presynaptic active zone membrane	21	-0.750407	-1.48539	0.0594936	0.584142	0.563652	1300	tags=38%, list=10%, signal=34%	SNAP29/RAB3A/SNAPIN/CPLX1/PRRT2/SNAP25/STX1B/STX2
BP	GO:0099500	vesicle fusion to plasma membrane	21	-0.750407	-1.48539	0.0594936	0.584142	0.563652	1300	tags=38%, list=10%, signal=34%	SNAP29/RAB3A/SNAPIN/CPLX1/PRRT2/SNAP25/STX1B/STX2
BP	GO:0071380	cellular response to prostaglandin E stimulus	12	-0.801002	-1.45064	0.059501	0.584142	0.563652	119	tags=17%, list=1%, signal=17%	GNB1/PTGER4
BP	GO:0002067	glandular epithelial cell differentiation	42	0.657179	1.4548	0.0597015	0.584142	0.563652	884	tags=19%, list=7%, signal=18%	PAX6/PDX1/RFX6/FGFR2/NEUROD1/INSM1/NOTCH1/PROX1
BP	GO:0030728	ovulation	13	0.831531	1.54188	0.059714	0.584142	0.563652	1326	tags=46%, list=10%, signal=41%	RGS2/ADAMTS1/PGR/NRIP1/INHBB/HPGD
BP	GO:0043044	ATP-dependent chromatin remodeling	60	-0.615757	-1.4291	0.0597826	0.584142	0.563652	999	tags=15%, list=8%, signal=14%	ACTR8/CENPK/CENPQ/CENPI/CENPT/SMARCA4/CENPN/MIS18A/CENPP
BP	GO:0097479	synaptic vesicle localization	50	-0.625949	-1.4119	0.0597826	0.584142	0.563652	1580	tags=34%, list=12%, signal=30%	SYN2/KIF5C/DTNBP1/PCDH17/SNAPIN/SNAP91/KIF5A/BRSK1/BLOC1S3/SYN1/BLOC1S2/AP3M2/BORCS5/TOR1A/CNIH2/PCLO/MAP2
BP	GO:0014850	response to muscle activity	22	0.748887	1.46797	0.0597938	0.584142	0.563652	1568	tags=32%, list=12%, signal=28%	TNS2/RYR2/PPARGC1A/ITGA2/HIF1A/METRNL/TOMM20
BP	GO:0097164	ammonium ion metabolic process	21	0.776657	1.51252	0.0599539	0.584142	0.563652	65	tags=10%, list=1%, signal=9%	DDC/TPH1
BP	GO:0030878	thyroid gland development	22	-0.732694	-1.45936	0.0599613	0.584142	0.563652	1730	tags=32%, list=14%, signal=28%	SIX1/HESX1/SHH/HOXA5/HOXD3/TG/MAP2K1
BP	GO:0043254	regulation of protein-containing complex assembly	345	-0.440106	-1.24107	0.0599647	0.584142	0.563652	1437	tags=14%, list=11%, signal=13%	MSN/MEFV/TMOD3/DAB2IP/P2RY12/ACTR2/CLDN7/ICAM1/DKK1/ARHGAP28/GSN/TAL1/GMFG/MAPRE3/LCAT/SNCA/TWF1/PRRT2/NUMA1/TIRAP/PLEK/RB1/DMTN/CTTN/TFRC/AIDA/CRYAB/SELP/TRAF2/TBX20/ARPC1B/VPS11/SKAP1/STX1B/CLU/ADD2/WAS/PREX1/SYK/LCP1/CYFIP2/MAP2/PTGER4/NCKAP1L/CDK5R1/TMOD4/CCR7/APOE/TRABD2B
BP	GO:0032757	positive regulation of interleukin-8 production	39	-0.659315	-1.41695	0.0600375	0.584142	0.563652	781	tags=38%, list=6%, signal=36%	TLR5/PYCARD/TNF/FFAR2/LBP/LAMTOR5/TLR3/TIRAP/WNT5A/PLA2G1B/CD2/TLR1/TLR7/SYK/TLR9
BP	GO:0050830	defense response to Gram-positive bacterium	39	-0.66517	-1.42954	0.0600375	0.584142	0.563652	1195	tags=36%, list=9%, signal=33%	LTA/MR1/TBK1/HLA-A/TIRAP/HAVCR2/PLA2G1B/IL17F/C5AR1/LYG2/CRP/PGLYRP2/LYZ/MPEG1
BP	GO:1902100	negative regulation of metaphase/anaphase transition of cell cycle	39	-0.659962	-1.41835	0.0600375	0.584142	0.563652	2717	tags=44%, list=21%, signal=34%	MOS/LCMT1/PCID2/BUB1/KNTC1/MAD2L1/NDC80/CDT1/DYNC1LI1/FBXO5/PLK1/BUB3/AURKB/CDC20/MAD2L1BP/GEN1/CCNB1
BP	GO:0007210	serotonin receptor signaling pathway	17	0.772649	1.47742	0.060241	0.584142	0.563652	486	tags=24%, list=4%, signal=23%	HRH3/CHRM4/HTR4/HTR3B
BP	GO:0035067	negative regulation of histone acetylation	13	-0.816491	-1.48175	0.0603166	0.584142	0.563652	883	tags=15%, list=7%, signal=14%	SNCA/SPI1
BP	GO:0002699	positive regulation of immune effector process	135	-0.507858	-1.30931	0.0603291	0.584142	0.563652	1085	tags=21%, list=9%, signal=20%	MR1/MLH1/SLC7A5/CRTAM/GATA2/HLA-A/XBP1/SEMA7A/TFRC/RAC2/WNT5A/BLK/SH2D1A/B2M/TRAF2/HLA-G/IL17F/RASGRP1/SLAMF6/MYB/VAV1/PTPRC/SYK/ITGB2/TLR9/SASH3/CD84/SH2D1B/CLNK
BP	GO:0006450	regulation of translational fidelity	13	0.800437	1.48422	0.0604839	0.584142	0.563652	1261	tags=46%, list=10%, signal=42%	RPS9/YRDC/EIF2S3/RPS5/DTD2/DTD1
BP	GO:1903580	positive regulation of ATP metabolic process	30	0.690684	1.46456	0.0604839	0.584142	0.563652	5	tags=3%, list=0%, signal=3%	INS
BP	GO:0019730	antimicrobial humoral response	47	-0.623174	-1.39924	0.0607143	0.584142	0.563652	799	tags=26%, list=6%, signal=24%	PRSS3/CXCL8/CXCL2/HLA-A/PLA2G1B/IL17F/CXCL10/CLU/PGLYRP2/LYZ/OCIAD2/LEAP2
CC	GO:0033116	endoplasmic reticulum-Golgi intermediate compartment membrane	67	0.609461	1.44146	0.0608696	0.584142	0.563652	68	tags=3%, list=1%, signal=3%	INS/AREG
BP	GO:0010759	positive regulation of macrophage chemotaxis	12	-0.822204	-1.48904	0.0609	0.584142	0.563652	1114	tags=50%, list=9%, signal=46%	AKIRIN1/THBS1/CMKLR1/C5AR1/CSF1/CSF1R
BP	GO:0030593	neutrophil chemotaxis	59	-0.612279	-1.41892	0.0609319	0.584142	0.563652	1327	tags=34%, list=10%, signal=31%	PIP5K1C/CXCL8/MOSPD2/CXCL2/CKLF/TIRAP/RAC2/PLA2G1B/PIK3CD/C5AR1/VAV1/CXCL10/SAA1/CSF3R/PREX1/SYK/ITGB2/NCKAP1L/CCR7/CCL3
CC	GO:0030670	phagocytic vesicle membrane	59	-0.612197	-1.41873	0.0609319	0.584142	0.563652	2200	tags=29%, list=17%, signal=24%	APPL2/TAP1/ATP6V0E1/VAMP3/RAB7A/RAB11B/TAP2/LAMP1/RAB22A/RAB10/LAMP2/HLA-A/CYBA/RAC2/B2M/HLA-G/TLR1
BP	GO:0043255	regulation of carbohydrate biosynthetic process	79	0.592436	1.42819	0.0610022	0.584142	0.563652	734	tags=9%, list=6%, signal=8%	GCG/INS/FAM3C/SIRT7/PPARGC1A/PASK/SIK1
BP	GO:0007190	activation of adenylate cyclase activity	31	-0.686551	-1.42546	0.0610236	0.584142	0.563652	755	tags=23%, list=6%, signal=21%	ADCY8/ADORA3/ADRB1/ADCYAP1/P2RY11/CALCA/ADCY5
MF	GO:0042805	actinin binding	32	0.681391	1.46138	0.0610998	0.584142	0.563652	2279	tags=41%, list=18%, signal=33%	CACNA1C/CSRP3/PDLIM4/MYOT/LDB3/PTPRT/NFKB1/PDLIM5/ADORA2A/TTN/MAGI1/MYPN/LRRC10
CC	GO:0043256	laminin complex	11	0.81035	1.44445	0.0611814	0.584142	0.563652	1335	tags=36%, list=11%, signal=33%	LAMC2/LAMB1/LAMA5/LAMC1
BP	GO:0045579	positive regulation of B cell differentiation	13	-0.786954	-1.42815	0.0612648	0.584142	0.563652	1255	tags=38%, list=10%, signal=35%	CD27/XBP1/SYK/INPP5D/NCKAP1L
BP	GO:0090239	regulation of histone H4 acetylation	13	-0.789252	-1.43232	0.0612648	0.584142	0.563652	73	tags=15%, list=1%, signal=15%	KAT7/SPI1
BP	GO:0002679	respiratory burst involved in defense response	10	0.821905	1.44987	0.0613108	0.584142	0.563652	295	tags=20%, list=2%, signal=20%	INS/RPS19
MF	GO:0019869	chloride channel inhibitor activity	10	0.816768	1.44081	0.0613108	0.584142	0.563652	492	tags=20%, list=4%, signal=19%	CFTR/WNK1
BP	GO:0045821	positive regulation of glycolytic process	21	0.752006	1.46451	0.0613497	0.584142	0.563652	5	tags=5%, list=0%, signal=5%	INS
BP	GO:0090231	regulation of spindle checkpoint	15	-0.768985	-1.43344	0.0615079	0.584142	0.563652	346	tags=47%, list=3%, signal=45%	MAD2L1/NDC80/CDT1/DYNC1LI1/MAD2L1BP/GEN1/CCNB1
BP	GO:0090266	regulation of mitotic cell cycle spindle assembly checkpoint	15	-0.768985	-1.43344	0.0615079	0.584142	0.563652	346	tags=47%, list=3%, signal=45%	MAD2L1/NDC80/CDT1/DYNC1LI1/MAD2L1BP/GEN1/CCNB1
BP	GO:1903504	regulation of mitotic spindle checkpoint	15	-0.768985	-1.43344	0.0615079	0.584142	0.563652	346	tags=47%, list=3%, signal=45%	MAD2L1/NDC80/CDT1/DYNC1LI1/MAD2L1BP/GEN1/CCNB1
BP	GO:0016540	protein autoprocessing	16	0.77902	1.48206	0.0616302	0.584142	0.563652	3	tags=6%, list=0%, signal=6%	PCSK2
BP	GO:1902176	negative regulation of oxidative stress-induced intrinsic apoptotic signaling pathway	16	0.778499	1.48107	0.0616302	0.584142	0.563652	5	tags=6%, list=0%, signal=6%	INS
BP	GO:1905269	positive regulation of chromatin organization	84	0.596838	1.44617	0.061674	0.584142	0.563652	957	tags=12%, list=8%, signal=11%	GCG/ISL1/TRIM28/KMT2A/PPARGC1A/LRRK2/SPHK2/KMT2E/RIF1/PRDM9
BP	GO:1902430	negative regulation of amyloid-beta formation	15	-0.796872	-1.48543	0.0617551	0.584142	0.563652	406	tags=27%, list=3%, signal=26%	RTN3/NTRK2/CLU/APOE
CC	GO:0031312	extrinsic component of organelle membrane	40	-0.66216	-1.42883	0.0617978	0.584142	0.563652	1154	tags=15%, list=9%, signal=14%	DOC2A/CCDC115/SYN1/SNX5/TOR1A/SARM1
BP	GO:0031952	regulation of protein autophosphorylation	37	0.663302	1.45994	0.0618557	0.584142	0.563652	5	tags=3%, list=0%, signal=3%	INS
BP	GO:0061178	regulation of insulin secretion involved in cellular response to glucose stimulus	46	0.662959	1.46541	0.0619469	0.584142	0.563652	179	tags=9%, list=1%, signal=9%	GCG/CFTR/PDX1/RFX6
BP	GO:0045580	regulation of T cell differentiation	94	-0.575129	-1.40949	0.0621972	0.584142	0.563652	1278	tags=26%, list=10%, signal=23%	BCL6/CD27/TESPA1/LOXL3/FANCD2/SMAD7/ADAM8/CRTAM/XBP1/NRARP/CD2/HLA-G/MYB/RHOH/SLC46A2/ZAP70/PTPRC/RUNX3/IRF1/ADA/SYK/SASH3/NCKAP1L/RUNX1
BP	GO:0006048	UDP-N-acetylglucosamine biosynthetic process	10	-0.820234	-1.44354	0.0623819	0.584142	0.563652	951	tags=30%, list=7%, signal=28%	PGM3/UAP1L1/AMDHD2
BP	GO:0051764	actin crosslink formation	10	-0.8205	-1.44401	0.0623819	0.584142	0.563652	146	tags=30%, list=1%, signal=30%	BAIAP2/LCP1/AIF1
BP	GO:0072677	eosinophil migration	10	-0.819874	-1.44291	0.0623819	0.584142	0.563652	881	tags=30%, list=7%, signal=28%	ADAM8/PTGER4/CCL3
BP	GO:0010543	regulation of platelet activation	27	-0.693794	-1.40995	0.0625	0.584142	0.563652	944	tags=43%, list=7%, signal=40%	SERPINE2/PDGFB/PRKCQ/TEC/TEC/PLEK/DMTN/PDPN/BLK/SELP/SYK/APOE
BP	GO:0031334	positive regulation of protein-containing complex assembly	193	-0.484598	-1.29142	0.0625	0.584142	0.563652	1596	tags=15%, list=13%, signal=13%	PFN2/GTF2H5/CYFIP1/TERF1/MSN/DAB2IP/P2RY12/ACTR2/ICAM1/GSN/TAL1/GMFG/SNCA/NUMA1/TIRAP/PLEK/CTTN/TFRC/ARPC1B/SKAP1/CLU/WAS/SYK/LCP1/NCKAP1L/CDK5R1/CCR7/TRABD2B
BP	GO:0070536	protein K63-linked deubiquitination	27	-0.698687	-1.4199	0.0625	0.584142	0.563652	1630	tags=19%, list=13%, signal=16%	BABAM1/OTUD1/ATXN3/SHMT2/OTUD7A
MF	GO:0015174	basic amino acid transmembrane transporter activity	14	0.787175	1.47297	0.0628803	0.584142	0.563652	767	tags=36%, list=6%, signal=34%	SLC22A2/SLC7A1/SLC7A3/SLC38A3/SLC47A1
BP	GO:0043951	negative regulation of cAMP-mediated signaling	14	0.788573	1.47558	0.0628803	0.584142	0.563652	1723	tags=57%, list=14%, signal=49%	RGS2/PDE3A/PDE2A/NPY2R/CRTC3/PDE11A/MGRN1/APLNR
BP	GO:2000179	positive regulation of neural precursor cell proliferation	44	0.649466	1.43198	0.0629067	0.584142	0.563652	1041	tags=18%, list=8%, signal=17%	LRP2/GLI1/NAP1L1/INSM1/CDON/NOTCH1/PROX1/HIF1A
BP	GO:0010499	proteasomal ubiquitin-independent protein catabolic process	19	-0.74669	-1.45916	0.0629921	0.584142	0.563652	1809	tags=32%, list=14%, signal=27%	PSMA8/NFE2L2/PSMB6/PSMB9/PSMB7/PSMB8
BP	GO:1903202	negative regulation of oxidative stress-induced cell death	34	0.674364	1.469	0.0630081	0.584142	0.563652	1041	tags=21%, list=8%, signal=19%	INS/HGF/HSPB1/LRRK2/IL10/NR4A3/HIF1A
BP	GO:0009914	hormone transport	252	0.504422	1.37395	0.0632054	0.584142	0.563652	1053	tags=11%, list=8%, signal=10%	GCG/INS/NMB/CFTR/SCG5/PDX1/CACNA1C/ISL1/RFX6/SLCO1C1/NEUROD1/SLC16A1/STXBP5L/NR0B2/FOXD1/KCNC2/PASK/RIMS2/CREB1/VGF/SSTR5/NR1D1/FAM3D/INHBB/CPT1A/HIF1A/ANO1
BP	GO:0046426	negative regulation of receptor signaling pathway via JAK-STAT	23	0.732953	1.46338	0.0632653	0.584142	0.563652	460	tags=13%, list=4%, signal=13%	SOCS2/NEUROD1/PTPRD
BP	GO:0060350	endochondral bone morphogenesis	45	0.660325	1.45907	0.0633188	0.584142	0.563652	1615	tags=27%, list=13%, signal=23%	TRPV4/NAB1/ALPL/AXIN2/COL27A1/COL2A1/FGF18/PHOSPHO1/TRIP11/MEF2D/GNAS/STC1
BP	GO:0002758	innate immune response-activating signal transduction	88	-0.551032	-1.34469	0.0635209	0.584142	0.563652	364	tags=8%, list=3%, signal=8%	PSMB9/PSMB7/SYK/PSME2/PSMB8/CLEC10A/CLEC4D
BP	GO:0031577	spindle checkpoint	36	-0.661095	-1.39757	0.0637066	0.584142	0.563652	2705	tags=42%, list=21%, signal=33%	LCMT1/PCID2/BUB1/KNTC1/MAD2L1/NDC80/CDT1/DYNC1LI1/PLK1/BUB3/AURKB/CDC20/MAD2L1BP/GEN1/CCNB1
BP	GO:0006479	protein methylation	137	0.546524	1.4023	0.0638767	0.584142	0.563652	1745	tags=15%, list=14%, signal=13%	GCG/SIRT7/KMT2C/SETD1A/KMT2A/CREBBP/GFI1/KMT2E/RIF1/PRDM9/DYDC1/ASH1L/EHMT1/SUPT6H/PRDM4/PRDM5/NSD1/PRMT3/OGT/SETD2
BP	GO:0008213	protein alkylation	137	0.546524	1.4023	0.0638767	0.584142	0.563652	1745	tags=15%, list=14%, signal=13%	GCG/SIRT7/KMT2C/SETD1A/KMT2A/CREBBP/GFI1/KMT2E/RIF1/PRDM9/DYDC1/ASH1L/EHMT1/SUPT6H/PRDM4/PRDM5/NSD1/PRMT3/OGT/SETD2
BP	GO:0002691	regulation of cellular extravasation	20	-0.741896	-1.46265	0.0639535	0.584142	0.563652	1407	tags=35%, list=11%, signal=31%	FUT7/ICAM1/ADAM8/PLVAP/FUT9/SELP/PTGER4
BP	GO:0042554	superoxide anion generation	25	-0.707847	-1.41663	0.064	0.584142	0.563652	1841	tags=32%, list=14%, signal=27%	SOD1/EDN1/NCF1/CYBA/PON3/CRP/SYK/ITGB2
BP	GO:0009266	response to temperature stimulus	186	0.528226	1.40089	0.0640177	0.584142	0.563652	935	tags=13%, list=7%, signal=12%	TRPV4/SST/ZNF516/TRPA1/CHORDC1/EPHB1/NUP210/PLAC8/PDCL3/MAP2K7/GMPR/EIF2AK3/HMOX1/TRPM3/SEH1L/PPARGC1A/CREBBP/NUP205/HSP90AB1/RPTOR/VGF/SLC52A3/HSPA8/EIF2S1
BP	GO:2000757	negative regulation of peptidyl-lysine acetylation	16	-0.760767	-1.42989	0.0641283	0.584142	0.563652	1002	tags=31%, list=8%, signal=29%	HINT2/HDAC2/KLF15/SNCA/SPI1
BP	GO:0034035	purine ribonucleoside bisphosphate metabolic process	15	-0.792987	-1.47819	0.0641532	0.584142	0.563652	185	tags=27%, list=1%, signal=26%	PAPSS2/SULT1A1/BPNT1/SULT4A1
BP	GO:0050427	3'-phosphoadenosine 5'-phosphosulfate metabolic process	15	-0.792987	-1.47819	0.0641532	0.584142	0.563652	185	tags=27%, list=1%, signal=26%	PAPSS2/SULT1A1/BPNT1/SULT4A1
CC	GO:0060198	clathrin-sculpted vesicle	12	-0.812107	-1.47075	0.0643799	0.584142	0.563652	387	tags=33%, list=3%, signal=32%	GAD2/SLC18A1/SLC17A7/SLC18A2
MF	GO:0005041	low-density lipoprotein particle receptor activity	12	0.807569	1.46469	0.0644491	0.584142	0.563652	400	tags=25%, list=3%, signal=24%	STAB2/LRP6/LDLR
BP	GO:0060263	regulation of respiratory burst	12	0.808596	1.46655	0.0644491	0.584142	0.563652	295	tags=17%, list=2%, signal=16%	INS/RPS19
BP	GO:0098703	calcium ion import across plasma membrane	12	0.804948	1.45994	0.0644491	0.584142	0.563652	233	tags=17%, list=2%, signal=16%	TRPV4/SLC8A3
BP	GO:1902656	calcium ion import into cytosol	12	0.804948	1.45994	0.0644491	0.584142	0.563652	233	tags=17%, list=2%, signal=16%	TRPV4/SLC8A3
BP	GO:0002220	innate immune response activating cell surface receptor signaling pathway	87	-0.553788	-1.34403	0.0644567	0.584142	0.563652	364	tags=8%, list=3%, signal=8%	PSMB9/PSMB7/SYK/PSME2/PSMB8/CLEC10A/CLEC4D
BP	GO:0001818	negative regulation of cytokine production	175	-0.489478	-1.28936	0.0645756	0.584142	0.563652	1453	tags=21%, list=11%, signal=18%	NLRX1/MEFV/PPARA/TUSC2/TAX1BP1/BCL6/INHBA/CSK/THBS1/SIRPA/CD200R1/SMAD7/CMKLR1/TBK1/TGFB3/CD200/HAVCR2/IL1RL1/C1QTNF3/ATP2B1/HOMER2/TIGIT/SIGIRR/PTPRS/PTPRC/PGLYRP2/HDAC9/TLR9/LRRC32/CD84/INPP5D/PTGER4/NCKAP1L/TWSG1/CCR7/CD274
BP	GO:0030316	osteoclast differentiation	67	-0.583555	-1.36902	0.0645756	0.584142	0.563652	1568	tags=24%, list=12%, signal=21%	LRRK1/ATP6AP1/MITF/GPR68/GPR183/TLR3/MAFB/TFRC/SIGLEC15/CCR1/ANXA2/CA2/INPP5D/CSF1/CCL3/CSF1R
CC	GO:0001772	immunological synapse	32	-0.670237	-1.39686	0.0645793	0.584142	0.563652	1358	tags=41%, list=11%, signal=36%	PRKCQ/ICAM1/DUSP3/CD53/CRTAM/HAVCR2/ATP2B1/RHOH/SKAP1/CD6/ZAP70/GZMA/CD3E
BP	GO:0002285	lymphocyte activation involved in immune response	115	-0.524914	-1.31513	0.0648649	0.584971	0.564453	1337	tags=20%, list=11%, signal=18%	APBB1IP/GPR183/LAMP1/BCL6/ICAM1/PARP3/UNG/MLH1/LOXL3/SMAD7/XBP1/TFRC/HAVCR2/SLAMF6/MYB/MFNG/LY9/SWAP70/PTPRC/PGLYRP2/ADA/LCP1/PTGER4
BP	GO:0060669	embryonic placenta morphogenesis	21	0.770218	1.49998	0.0648853	0.584971	0.564453	708	tags=24%, list=6%, signal=23%	FZD5/FGFR2/TRIM28/NCOA1/IL10
MF	GO:0030228	lipoprotein particle receptor activity	14	0.78111	1.46162	0.0649087	0.584971	0.564453	400	tags=21%, list=3%, signal=21%	STAB2/LRP6/LDLR
BP	GO:0051235	maintenance of location	242	-0.470627	-1.28931	0.0650995	0.585975	0.565421	1331	tags=14%, list=10%, signal=12%	PPARA/AUP1/ANK2/JPH3/JPH1/GAA/GSN/FKBP1B/HEXB/NRROS/SNCA/TWF1/CCDC22/SREBF1/DRD2/XCR1/FTO/P2RY6/CRP/PKD1/TXN/SLC30A4/CXCL10/PTPRC/TMEM38A/DGAT2/FASLG/DMD/ITGB3/CCR7/CCL3/APOE/SLC18A2
BP	GO:0035115	embryonic forelimb morphogenesis	24	0.716355	1.46312	0.0652174	0.586321	0.565755	102	tags=8%, list=1%, signal=8%	WNT7A/CACNA1C
BP	GO:0003279	cardiac septum development	87	0.587471	1.42442	0.0653595	0.586884	0.566298	1439	tags=26%, list=11%, signal=24%	LRP2/TGFBR1/ISL1/SLIT2/CRELD1/FGFR2/TBX2/STRA6/WNT11/SEMA3C/TGFB2/NOTCH1/PDE2A/PROX1/NOTCH2/ZFPM1/CHD7/SLIT3/PLXND1/HAND1/MAML1/TRIP11/SMO
BP	GO:0010043	response to zinc ion	37	-0.659844	-1.39659	0.065764	0.588696	0.568047	335	tags=14%, list=3%, signal=13%	SLC30A4/CA2/ASS1/HAMP/SLC30A1
BP	GO:0090322	regulation of superoxide metabolic process	22	-0.727783	-1.44958	0.065764	0.588696	0.568047	655	tags=27%, list=5%, signal=26%	SOD1/NFE2L2/PON3/CRP/SYK/ITGB2
CC	GO:0030687	preribosome, large subunit precursor	22	0.739799	1.45015	0.0659794	0.588696	0.568047	2206	tags=32%, list=17%, signal=26%	NSA2/PPAN/MDN1/WDR74/MRTO4/EIF6/RRP1
BP	GO:0035404	histone-serine phosphorylation	10	-0.818473	-1.44044	0.0661626	0.588696	0.568047	1180	tags=40%, list=9%, signal=36%	MST1/AURKA/AURKB/CCNB1
BP	GO:2000403	positive regulation of lymphocyte migration	23	-0.712306	-1.42546	0.0664062	0.588696	0.568047	881	tags=22%, list=7%, signal=20%	ADAM8/WNT5A/CXCL10/AIF1/CCL3
BP	GO:0045722	positive regulation of gluconeogenesis	13	0.792374	1.46927	0.0665323	0.588696	0.568047	4	tags=8%, list=0%, signal=8%	GCG
BP	GO:0000819	sister chromatid segregation	167	-0.486815	-1.2844	0.0666667	0.588696	0.568047	2249	tags=25%, list=18%, signal=20%	PIBF1/SMC2/CDC27/DSN1/EML4/MAD2L1/RMI2/NDC80/CDT1/CUL3/NEK6/DYNC1LI1/FBXO5/PLK1/NCAPG2/MAP10/BUB3/DLGAP5/KIF23/ESCO2/TUBG1/NCAPD2/STAG1/SMC5/CDC6/KIF2C/UBE2C/CENPK/NUMA1/RB1/NUF2/AURKB/CDC20/NCAPD3/VPS4A/NUSAP1/NEK2/PRC1/MAD2L1BP/GEN1/CCNB1
BP	GO:0002532	production of molecular mediator involved in inflammatory response	52	0.630052	1.43058	0.0666667	0.588696	0.568047	517	tags=10%, list=4%, signal=9%	INS/CHIA/IL1R2/RPS19/ABCD2
BP	GO:0043555	regulation of translation in response to stress	18	0.752988	1.44571	0.0666667	0.588696	0.568047	2159	tags=44%, list=17%, signal=37%	EIF2AK3/RPS6KA3/EIF2S1/EIF4G1/IMPACT/EIF2AK4/PPP1R15B/RBM4
BP	GO:0048663	neuron fate commitment	52	0.638472	1.4497	0.0666667	0.588696	0.568047	860	tags=13%, list=7%, signal=13%	FEV/PAX6/TGFBR1/ISL1/PTF1A/ATOH1/NOTCH1
BP	GO:0050855	regulation of B cell receptor signaling pathway	19	-0.74305	-1.45204	0.0669291	0.588696	0.568047	1016	tags=26%, list=8%, signal=24%	FCRL3/BLK/LPXN/PAX5/RUNX1
BP	GO:0006595	polyamine metabolic process	14	0.778446	1.45663	0.0669371	0.588696	0.568047	12	tags=7%, list=0%, signal=7%	AOC1
MF	GO:0048018	receptor ligand activity	258	0.495488	1.35604	0.0672646	0.588696	0.568047	965	tags=14%, list=8%, signal=13%	GCG/INS/SST/NMB/GUCA2A/AREG/WNT7A/IL17C/FLRT3/SEMA4C/NPY/CDC42EP2/GREM2/FAM3C/BMP1/SEMA5A/WNT9A/IL12B/HGF/BMP3/WNT11/RLN3/FGF5/CCL25/IL10/SEMA3C/CLCF1/VGF/MIA/TGFB2/ADM2/GPHA2/FAM3D/INHBB/FGF7/CRLF1
BP	GO:0031497	chromatin assembly	90	-0.545497	-1.33126	0.0672727	0.588696	0.568047	1387	tags=19%, list=11%, signal=17%	CENPL/PARP10/CENPV/SIRT2/MCM2/UBN1/HELLS/ASF1A/CENPK/CENPQ/CENPI/CENPT/CHAF1A/PPHLN1/CENPN/MIS18A/CENPP
BP	GO:0010165	response to X-ray	29	-0.683144	-1.41212	0.0673267	0.588696	0.568047	36	tags=10%, list=0%, signal=10%	RAD51/BRCA2/HAMP
BP	GO:0006044	N-acetylglucosamine metabolic process	15	-0.759806	-1.41633	0.0674603	0.588696	0.568047	149	tags=13%, list=1%, signal=13%	CHST6/AMDHD2
BP	GO:0043652	engulfment of apoptotic cell	15	-0.761169	-1.41887	0.0674603	0.588696	0.568047	1925	tags=40%, list=15%, signal=34%	RHOG/XKR8/THBS1/RAC2/RHOH/XKR5
BP	GO:0034375	high-density lipoprotein particle remodeling	13	-0.81286	-1.47516	0.0674827	0.588696	0.568047	52	tags=38%, list=0%, signal=38%	APOA1/PLTP/LCAT/APOE/APOA4
BP	GO:1903076	regulation of protein localization to plasma membrane	87	0.586276	1.42152	0.0675381	0.588696	0.568047	1405	tags=15%, list=11%, signal=13%	INS/ACTB/CSRP3/CLIP3/PRKCH/DAB2/MRAP2/ZDHHC2/ATP2B4/SPTBN1/PLS1/CLTC/LDLRAP1
BP	GO:0018022	peptidyl-lysine methylation	98	0.569583	1.39626	0.0675676	0.588696	0.568047	1065	tags=10%, list=8%, signal=9%	GCG/KMT2C/SETD1A/KMT2A/GFI1/KMT2E/RIF1/PRDM9/DYDC1/ASH1L
BP	GO:0032615	interleukin-12 production	36	-0.651034	-1.3763	0.0675676	0.588696	0.568047	1424	tags=36%, list=11%, signal=32%	MEFV/TLR3/THBS1/MAPK11/CMKLR1/TIRAP/HLA-G/TIGIT/IRF1/SYK/TLR9/CCR7/IRF8
BP	GO:0032655	regulation of interleukin-12 production	36	-0.651034	-1.3763	0.0675676	0.588696	0.568047	1424	tags=36%, list=11%, signal=32%	MEFV/TLR3/THBS1/MAPK11/CMKLR1/TIRAP/HLA-G/TIGIT/IRF1/SYK/TLR9/CCR7/IRF8
BP	GO:0034205	amyloid-beta formation	36	-0.651492	-1.37727	0.0675676	0.588696	0.568047	406	tags=14%, list=3%, signal=13%	RTN3/PSEN2/NTRK2/CLU/APOE
BP	GO:0055008	cardiac muscle tissue morphogenesis	49	0.647153	1.4496	0.0675676	0.588696	0.568047	1116	tags=27%, list=9%, signal=24%	LRP2/TGFBR1/DSP/ISL1/MYBPC3/RYR2/FGFR2/TNNC1/TGFB2/NOTCH1/PROX1/ZFPM1/CHD7
BP	GO:0061512	protein localization to cilium	45	0.65147	1.4395	0.0676856	0.588696	0.568047	340	tags=9%, list=3%, signal=9%	TBC1D32/DYNC2H1/DZIP1/FAM149B1
BP	GO:0008347	glial cell migration	37	-0.658375	-1.39348	0.0676983	0.588696	0.568047	1347	tags=24%, list=11%, signal=22%	DAB2IP/P2RY12/GPR183/HEXB/CERS2/P2RY1/CSF1/CDK5R1/CCL3
CC	GO:0099240	intrinsic component of synaptic membrane	122	-0.519317	-1.31659	0.0677362	0.588696	0.568047	1373	tags=19%, list=11%, signal=17%	CHRNA1/PCDH17/ADCY8/SLC1A6/GPM6A/GRIK4/P2RY1/CSPG5/GRID2/NRP2/DRD2/ATP2B1/SLITRK2/LRRC4B/CHRNA9/CLSTN1/PTPRS/SHISA9/CNIH2/GABRG3/SLITRK3/SLC30A1/ABHD6
BP	GO:0035883	enteroendocrine cell differentiation	26	0.702686	1.4736	0.0679612	0.588696	0.568047	763	tags=19%, list=6%, signal=18%	PAX6/PDX1/RFX6/NEUROD1/INSM1
BP	GO:0032922	circadian regulation of gene expression	58	0.624468	1.42876	0.0680272	0.588696	0.568047	1769	tags=33%, list=14%, signal=28%	RAI1/NPAS2/MYCBP2/KMT2A/NR0B2/PPARGC1A/NCOA2/NRIP1/KDM5A/NR1D1/ZFHX3/RELB/ID4/AHR/CIART/NOCT/OGT/PER1/ARNTL
CC	GO:0099060	integral component of postsynaptic specialization membrane	55	-0.61106	-1.39747	0.0681004	0.588696	0.568047	750	tags=16%, list=6%, signal=15%	GRID2/LRRC4B/CHRNA9/CLSTN1/PTPRS/SHISA9/CNIH2/SLITRK3/SLC30A1
CC	GO:0031307	integral component of mitochondrial outer membrane	16	-0.74902	-1.40781	0.0681363	0.588696	0.568047	485	tags=12%, list=4%, signal=12%	GDAP1/MGARP
BP	GO:0007224	smoothened signaling pathway	109	0.56042	1.39583	0.0681818	0.588696	0.568047	861	tags=17%, list=7%, signal=16%	TBC1D32/PDX1/DYNC2H1/FGFR2/STIL/GLI1/DZIP1/EVC/ROR2/MAP3K10/MEGF8/TTC23/CREBBP/DISP2/C2CD3/EVC2/CDON/DLG5
MF	GO:0015278	calcium-release channel activity	17	0.750715	1.43548	0.0682731	0.588696	0.568047	196	tags=12%, list=2%, signal=12%	TRPA1/RYR2
BP	GO:0019081	viral translation	15	0.765202	1.44625	0.0682731	0.588696	0.568047	2781	tags=67%, list=22%, signal=52%	CSDE1/EIF3B/EIF3A/DHX9/PTBP1/EIF2AK4/EIF3G/EIF3F/EIF3L/EIF3D
BP	GO:0045725	positive regulation of glycogen biosynthetic process	13	0.786815	1.45896	0.0685484	0.589457	0.568782	5	tags=8%, list=0%, signal=8%	INS
BP	GO:0003002	regionalization	265	0.492421	1.35328	0.0685841	0.589457	0.568782	1758	tags=18%, list=14%, signal=16%	TBC1D32/FZD5/LRP2/PGAP1/WNT7A/DYNC2H1/TGFBR1/ISL1/FGFR2/CDX4/GLI1/FOXJ1/LRP6/ACVR2A/NEUROD1/ROR2/MEGF8/FOXD1/NKD1/WNT11/HELT/DDIT3/AXIN2/SEMA3C/CDON/MNS1/NOTCH1/DSCAML1/NOTCH2/LFNG/HES2/NR2F2/PBX3/PTCH1/GREM1/SMO/FUZ/HOXB5/HES6/HOXA10/TDRD5/FKBP8/BPTF/LEF1/LRP5/NKX2-2/SRF
BP	GO:0034968	histone lysine methylation	91	0.581536	1.41439	0.0687361	0.589457	0.568782	1065	tags=11%, list=8%, signal=10%	GCG/KMT2C/SETD1A/KMT2A/GFI1/KMT2E/RIF1/PRDM9/DYDC1/ASH1L
BP	GO:0046660	female sex differentiation	95	0.576579	1.41443	0.0687361	0.589457	0.568782	1256	tags=17%, list=10%, signal=15%	LRP2/FST/ADAMTS1/SLIT2/STRA6/PGR/PCYT1B/NRIP1/VGF/SRC/ARID5B/INHBB/CHD7/PDGFRA/PTPRN/SLIT3
BP	GO:1900407	regulation of cellular response to oxidative stress	57	0.624478	1.42723	0.0688073	0.589457	0.568782	1041	tags=14%, list=8%, signal=13%	INS/HGF/HSPB1/P4HB/LRRK2/IL10/NR4A3/HIF1A
BP	GO:0002262	myeloid cell homeostasis	118	-0.521929	-1.31097	0.0688406	0.589457	0.568782	1278	tags=21%, list=10%, signal=19%	BCL6/INHBA/FLVCR1/TAL1/MAFB/HCAR2/KLF1/GATA2/RB1/DMTN/TMEM14C/FANCC/DNASE2/MED1/B2M/PIK3CD/IKZF1/SLC4A1/MAEA/INPP5D/NCKAP1L/KLF13/SPI1/ALAS2/HAMP
MF	GO:0043539	protein serine/threonine kinase activator activity	30	-0.67905	-1.40794	0.06917	0.591592	0.570841	117	tags=13%, list=1%, signal=13%	CKS1B/CCNB1/CDK5R1/MAP2K1
BP	GO:0046879	hormone secretion	244	0.507337	1.37884	0.0693512	0.592455	0.571674	1053	tags=11%, list=8%, signal=10%	GCG/INS/NMB/CFTR/SCG5/PDX1/CACNA1C/ISL1/RFX6/NEUROD1/SLC16A1/STXBP5L/NR0B2/FOXD1/KCNC2/PASK/RIMS2/CREB1/VGF/SSTR5/NR1D1/FAM3D/INHBB/CPT1A/HIF1A/ANO1
BP	GO:0051988	regulation of attachment of spindle microtubules to kinetochore	13	-0.809823	-1.46965	0.0698714	0.595928	0.575026	569	tags=31%, list=4%, signal=29%	SIRT2/AURKB/NEK2/CCNB1
BP	GO:0002577	regulation of antigen processing and presentation	10	-0.815782	-1.43571	0.0699433	0.595928	0.575026	269	tags=40%, list=2%, signal=39%	THBS1/TAPBPL/WAS/CCR7
BP	GO:0060292	long-term synaptic depression	25	-0.703409	-1.40774	0.07	0.595928	0.575026	1478	tags=24%, list=12%, signal=21%	CD38/SLC24A2/ADCY8/GRID2/CBLN1/ABHD6
MF	GO:0001848	complement binding	16	-0.748067	-1.40602	0.0701403	0.596359	0.575441	1996	tags=50%, list=16%, signal=42%	CD59/C4B/C8A/CFB/CD93/C5AR1/CRP/ITGB2
CC	GO:0097431	mitotic spindle pole	32	-0.667178	-1.39048	0.0704501	0.596359	0.575441	1661	tags=22%, list=13%, signal=19%	PLK1/MAP10/STAG1/NUMA1/AURKA/AURKB/EML1
BP	GO:0007202	activation of phospholipase C activity	24	-0.700943	-1.39823	0.0705645	0.596359	0.575441	1344	tags=29%, list=11%, signal=26%	P2RY12/GNAQ/BDNF/P2RY6/C5AR1/NTRK2/ITK
BP	GO:0033598	mammary gland epithelial cell proliferation	24	-0.696509	-1.38938	0.0705645	0.596359	0.575441	1663	tags=33%, list=13%, signal=29%	HOXA5/BRCA2/GPX1/ZNF703/MST1/ROBO1/WNT5A/MED1
CC	GO:0048787	presynaptic active zone membrane	24	-0.698369	-1.39309	0.0705645	0.596359	0.575441	1514	tags=25%, list=12%, signal=22%	CNTNAP1/GPM6A/P2RY1/ATP2B1/STX1B/STX2
BP	GO:1905039	carboxylic acid transmembrane transport	125	0.538841	1.36045	0.0707763	0.596359	0.575441	1522	tags=21%, list=12%, signal=18%	FOLR2/LRP2/ACSL5/RGS2/SLC6A19/SLC22A2/SLC7A1/SLC7A3/SLC16A1/ACACB/STRA6/ABCD2/SLC38A3/SLC47A1/SLC5A6/CPT1A/ABCC1/SLC25A15/PRKAG2/LRRC8E/SLC23A1/SLC32A1/SLC25A12/ACSL1/SLC38A8/SLC43A1
BP	GO:0000186	activation of MAPKK activity	46	0.64819	1.43276	0.0707965	0.596359	0.575441	1043	tags=17%, list=8%, signal=16%	TGFBR1/MAP3K15/MAP3K10/LRRK2/KIDINS220/ADAM9/TAOK2/MAP3K4
BP	GO:1903201	regulation of oxidative stress-induced cell death	46	0.649583	1.43584	0.0707965	0.596359	0.575441	1041	tags=17%, list=8%, signal=16%	INS/HGF/HSPB1/P4HB/LRRK2/IL10/NR4A3/HIF1A
BP	GO:1903670	regulation of sprouting angiogenesis	31	0.671214	1.43496	0.0708502	0.596359	0.575441	2506	tags=45%, list=20%, signal=36%	BMPER/GLUL/IL10/TJP1/ADAMTS9/PPP1R16B/EPN2/KLF4/JAK1/JMJD8/GHSR/S100A1/VEGFA/KLF2
MF	GO:0030546	signaling receptor activator activity	264	0.493993	1.35759	0.0709534	0.596359	0.575441	965	tags=14%, list=8%, signal=13%	GCG/INS/SST/NMB/GUCA2A/AREG/WNT7A/IL17C/FLRT3/SEMA4C/NPY/CDC42EP2/GREM2/FAM3C/BMP1/SEMA5A/WNT9A/IL12B/HGF/BMP3/WNT11/RLN3/FGF5/CCL25/IL10/SEMA3C/CLCF1/VGF/MIA/TGFB2/ADM2/GPHA2/FAM3D/INHBB/FGF7/CRLF1
BP	GO:2000737	negative regulation of stem cell differentiation	18	-0.733081	-1.41596	0.0710059	0.596359	0.575441	1088	tags=33%, list=9%, signal=31%	HES5/NFE2L2/JAG1/PRICKLE1/ESRRB/OCIAD2
BP	GO:0051984	positive regulation of chromosome segregation	13	-0.808571	-1.46738	0.0710658	0.596359	0.575441	1992	tags=62%, list=16%, signal=52%	CDT1/SIRT2/SMC5/CDC6/NUMA1/AURKB/MAD2L1BP/CCNB1
BP	GO:1903825	organic acid transmembrane transport	126	0.535845	1.3541	0.0711009	0.596359	0.575441	1522	tags=21%, list=12%, signal=18%	FOLR2/LRP2/ACSL5/RGS2/SLC6A19/SLC22A2/SLC7A1/SLC7A3/SLC16A1/ACACB/STRA6/ABCD2/SLC38A3/SLC47A1/SLC5A6/CPT1A/ABCC1/SLC25A15/PRKAG2/LRRC8E/SLC23A1/SLC32A1/SLC25A12/ACSL1/SLC38A8/SLC43A1
BP	GO:0043032	positive regulation of macrophage activation	17	-0.731618	-1.40188	0.0714286	0.597561	0.576601	1114	tags=47%, list=9%, signal=43%	THBS1/CEBPA/HAVCR2/WNT5A/IL1RL1/CTSC/CCL3/HAMP
BP	GO:0031145	anaphase-promoting complex-dependent catabolic process	75	-0.565916	-1.35513	0.0715596	0.597561	0.576601	2257	tags=28%, list=18%, signal=23%	PSMD9/CDC27/MAD2L1/CUL3/CDK1/PSMA8/FBXO5/PLK1/BUB3/ANAPC16/CDK2/UBE2C/PSMB6/AURKA/AURKB/CDC20/PSMB9/PSMB7/PSME2/PSMB8/CCNB1
BP	GO:0070228	regulation of lymphocyte apoptotic process	37	-0.655678	-1.38777	0.0715667	0.597561	0.576601	1549	tags=30%, list=12%, signal=26%	TSC22D3/PRKCQ/BCL6/CD27/ADAM8/WNT5A/BLK/AURKB/SLC46A2/ADA/CD274
BP	GO:0061045	negative regulation of wound healing	59	-0.601005	-1.39279	0.0716846	0.597561	0.576601	1114	tags=19%, list=9%, signal=17%	THBS1/PROC/CPB2/TSPAN8/PLAUR/GP1BA/ADTRP/PLAU/SERPING1/APOE/F11
MF	GO:0005217	intracellular ligand-gated ion channel activity	28	0.692038	1.45087	0.0717131	0.597561	0.576601	196	tags=11%, list=2%, signal=11%	CFTR/TRPA1/RYR2
BP	GO:0075522	IRES-dependent viral translational initiation	11	0.797059	1.42076	0.07173	0.597561	0.576601	599	tags=27%, list=5%, signal=26%	CSDE1/EIF3B/EIF3A
BP	GO:0031667	response to nutrient levels	355	0.473644	1.31108	0.0719258	0.598439	0.577448	1076	tags=15%, list=8%, signal=14%	AOC1/SST/FOLR2/CYP24A1/PDX1/SLC6A19/ATF3/NPY/TH/SGIP1/CLEC16A/MIOS/CYP27B1/SLC10A1/GCN1/SZT2/EIF2AK3/SCTR/PHEX/SLC16A1/ACACB/HMOX1/LDLR/ALPL/HTR4/NUAK1/SEH1L/PPARGC1A/NCOA1/PPM1D/WNT11/LRRK2/ITGA2/DDIT3/SLC38A3/LIPG/ADIPOR2/SIK1/RPTOR/VGF/CPS1/PROX1/EIF2A/SRC/HSPA8/EIF2S1/INHBB/ULK1/CPT1A/CPEB4/SLC25A25/PRKAG2
BP	GO:0006783	heme biosynthetic process	21	-0.729227	-1.44346	0.0721248	0.598439	0.577448	1896	tags=24%, list=15%, signal=20%	SRRD/UROD/IBA57/TMEM14C/ALAS2
BP	GO:0007252	I-kappaB phosphorylation	16	-0.746424	-1.40293	0.0721443	0.598439	0.577448	1347	tags=44%, list=11%, signal=39%	DAB2IP/TLR3/SIRPA/PRDX4/TRAF2/TLR7/TLR9
BP	GO:0035313	wound healing, spreading of epidermal cells	15	0.762346	1.44085	0.0722892	0.598439	0.577448	2635	tags=60%, list=21%, signal=48%	WNT7A/PHLDB2/ADAM17/COL5A1/MTOR/FERMT2/RREB1/CLASP2/HBEGF
BP	GO:0016051	carbohydrate biosynthetic process	174	0.521564	1.37087	0.0723684	0.598439	0.577448	1124	tags=13%, list=9%, signal=12%	GCG/INS/LALBA/PGAM2/ATF3/FAM3C/CRTC2/PC/SIRT7/HAS3/PGK1/PPARGC1A/SLC39A14/PASK/SIK1/NANS/TKT/NR1D1/ST3GAL2/SOGA1/INSR/PGAM1/ST6GALNAC1
BP	GO:0050708	regulation of protein secretion	219	0.509155	1.37411	0.0723982	0.598439	0.577448	1053	tags=12%, list=8%, signal=11%	GCG/INS/CFTR/PDX1/CACNA1C/P3H1/ISL1/RFX6/DISP1/NEUROD1/SLC16A1/SLC12A2/APBB1/IL12B/STXBP5L/NR0B2/KCNC2/SSTR5/TGFB2/NR1D1/ADAM9/FAM3D/INHBB/CPT1A/HIF1A/ANO1
BP	GO:0006047	UDP-N-acetylglucosamine metabolic process	14	-0.771587	-1.41233	0.0726916	0.598439	0.577448	1215	tags=29%, list=10%, signal=26%	PGM3/MGAT1/UAP1L1/AMDHD2
MF	GO:0030021	extracellular matrix structural constituent conferring compression resistance	14	-0.768706	-1.40706	0.0726916	0.598439	0.577448	532	tags=43%, list=4%, signal=41%	PODN/DCN/TUFT1/BGN/PRELP/HSPG2
BP	GO:0045842	positive regulation of mitotic metaphase/anaphase transition	14	-0.768544	-1.40676	0.0726916	0.598439	0.577448	2196	tags=43%, list=17%, signal=35%	CDC27/CDT1/CUL3/DLGAP5/RB1/MAD2L1BP
BP	GO:1901970	positive regulation of mitotic sister chromatid separation	14	-0.768544	-1.40676	0.0726916	0.598439	0.577448	2196	tags=43%, list=17%, signal=35%	CDC27/CDT1/CUL3/DLGAP5/RB1/MAD2L1BP
CC	GO:0099522	region of cytosol	18	0.748049	1.43623	0.0727273	0.598439	0.577448	2304	tags=44%, list=18%, signal=36%	TRIM9/LRRK2/HSPA8/HTT/DBN1/NCS1/CTBP2/MTOR
BP	GO:0045686	negative regulation of glial cell differentiation	19	0.742081	1.43804	0.0728745	0.598983	0.577973	1061	tags=26%, list=8%, signal=24%	NKX6-2/LDLR/NOTCH1/NR1D1/DAAM2
BP	GO:0032609	interferon-gamma production	63	-0.588103	-1.37742	0.0736086	0.603513	0.582344	1273	tags=40%, list=10%, signal=36%	INHBA/TLR3/LTA/SIRPA/SLC7A5/EBI3/CRTAM/HLA-A/HAVCR2/WNT5A/IL1RL1/CD2/RASGRP1/SLAMF6/HLA-DPA1/TLR7/CD276/PGLYRP2/TLR9/SASH3/HLA-DPB1/CD3E/CCR7/CD274/IRF8
BP	GO:0010675	regulation of cellular carbohydrate metabolic process	114	0.548008	1.3759	0.0736607	0.603513	0.582344	1097	tags=15%, list=9%, signal=14%	GCG/INS/FAM3C/SIRT7/ACACB/PDK1/HDAC4/PPARGC1A/NCOA2/PASK/SIK1/NKX1-1/NCOR1/SRC/SOGA1/INSR/PGAM1
MF	GO:1990756	ubiquitin ligase-substrate adaptor activity	10	-0.810839	-1.42701	0.073724	0.603513	0.582344	972	tags=30%, list=8%, signal=28%	SPSB4/DET1/PEF1
BP	GO:0045833	negative regulation of lipid metabolic process	69	0.585354	1.38765	0.0737527	0.603513	0.582344	884	tags=14%, list=7%, signal=14%	INS/MALRD1/CYP27B1/CCDC3/ACACB/SCAP/GFI1/SIK1/NCOR1/PROX1
BP	GO:0032735	positive regulation of interleukin-12 production	25	-0.696084	-1.39308	0.074	0.604739	0.583527	1228	tags=36%, list=10%, signal=33%	TLR3/MAPK11/TIRAP/HLA-G/IRF1/SYK/TLR9/CCR7/IRF8
BP	GO:0017121	plasma membrane phospholipid scrambling	16	-0.742721	-1.39597	0.0741483	0.604739	0.583527	268	tags=25%, list=2%, signal=25%	XKR8/SLC4A1/XKR5/FASLG
MF	GO:0070003	threonine-type peptidase activity	16	-0.744596	-1.3995	0.0741483	0.604739	0.583527	822	tags=31%, list=6%, signal=29%	PSMB6/PSMB9/PSMB7/ASRGL1/PSMB8
BP	GO:0000041	transition metal ion transport	91	-0.5417	-1.32154	0.0744102	0.60534	0.584107	2178	tags=26%, list=17%, signal=22%	LTF/STEAP3/ATP6V0E1/ATP6V1B2/ATP6V1C1/SCARA5/SLC48A1/SLC46A1/ATOX1/RAB11B/ATP6AP1/ATP6V1H/FLVCR1/CP/TFRC/ATP2C1/B2M/TMEM163/SLC30A4/FLVCR2/SLC31A2/TCN2/HAMP/SLC30A1
MF	GO:0015276	ligand-gated ion channel activity	107	-0.521616	-1.30464	0.0744681	0.60534	0.584107	1080	tags=17%, list=8%, signal=16%	FKBP1B/ASIC2/KCNJ12/GRIK4/AQP1/GABRR2/GRID2/GABRB1/CNGA3/GRIN1/GRIK2/CHRNA9/GRIA2/GABRR1/GABRG3/GABRD/KCNJ2/GRIN2C
MF	GO:0022834	ligand-gated channel activity	107	-0.521616	-1.30464	0.0744681	0.60534	0.584107	1080	tags=17%, list=8%, signal=16%	FKBP1B/ASIC2/KCNJ12/GRIK4/AQP1/GABRR2/GRID2/GABRB1/CNGA3/GRIN1/GRIK2/CHRNA9/GRIA2/GABRR1/GABRG3/GABRD/KCNJ2/GRIN2C
CC	GO:0099061	integral component of postsynaptic density membrane	40	-0.646282	-1.39457	0.0749064	0.608233	0.586899	750	tags=20%, list=6%, signal=19%	GRID2/LRRC4B/CLSTN1/PTPRS/SHISA9/CNIH2/SLITRK3/SLC30A1
MF	GO:0003743	translation initiation factor activity	46	0.640451	1.41565	0.0752212	0.609194	0.587826	2131	tags=30%, list=17%, signal=25%	EIF3H/EIF3C/EIF3B/EIF3A/EIF2S3/EIF2A/EIF2S1/EIF4A1/EIF3M/EIF4G1/MTIF2/EIF3I/EIF6/EIF3E
BP	GO:0019882	antigen processing and presentation	179	-0.476512	-1.25945	0.0755064	0.609194	0.587826	1809	tags=20%, list=14%, signal=17%	PSMA8/DYNC1LI1/GBA/RAB7A/KIF11/NCF1/TAP2/RAB35/CLEC4M/KIF23/ICAM1/KIF5A/THBS1/MR1/BCAP31/RAB10/KIF2C/CTSD/PSMB6/HLA-A/CYBA/B2M/HLA-G/HLA-DPA1/FCGR1A/PSMB9/PSMB7/CTSS/TAPBPL/WAS/PSME2/LGMN/PSMB8/HLA-DPB1/CCR7
BP	GO:0034728	nucleosome organization	82	-0.556975	-1.34046	0.0757856	0.609194	0.587826	1387	tags=15%, list=11%, signal=13%	MCM2/UBN1/ASF1A/CENPK/CENPQ/CENPI/CENPT/CHAF1A/SMARCA4/CENPN/MIS18A/CENPP
BP	GO:0006112	energy reserve metabolic process	69	0.578633	1.37172	0.0759219	0.609194	0.587826	1449	tags=19%, list=11%, signal=17%	INS/STK40/PHKA2/PASK/MRAP2/NR1D1/MYC/PRKAG2/INSR/PRLH/DYRK2/KL/GNAS
MF	GO:0046332	SMAD binding	69	0.581769	1.37915	0.0759219	0.609194	0.587826	2700	tags=38%, list=21%, signal=30%	PAX6/TGFBR1/TGIF1/MAGI2/SMAD9/DAB2/AXIN2/ZMIZ1/ZBTB7A/SMURF2/USP9X/ANKRD1/ZC3H3/USP15/PMEPA1/IPO7/RNF111/JUN/DDX5/AXIN1/FERMT2/TGFBR3/HMGA2/HIPK2/SKOR2/CTNNB1
CC	GO:0098948	intrinsic component of postsynaptic specialization membrane	57	-0.606927	-1.40077	0.0759717	0.609194	0.587826	750	tags=16%, list=6%, signal=15%	GRID2/LRRC4B/CHRNA9/CLSTN1/PTPRS/SHISA9/CNIH2/SLITRK3/SLC30A1
BP	GO:0009953	dorsal/ventral pattern formation	67	0.583821	1.38081	0.076087	0.609194	0.587826	1724	tags=16%, list=14%, signal=14%	TBC1D32/WNT7A/DYNC2H1/GLI1/DDIT3/DSCAML1/PTCH1/GREM1/SMO/FKBP8/NKX2-2
BP	GO:0001731	formation of translation preinitiation complex	10	0.805216	1.42043	0.0761099	0.609194	0.587826	747	tags=20%, list=6%, signal=19%	RPL13A/EIF2S3
MF	GO:0048487	beta-tubulin binding	33	0.664388	1.43284	0.0761317	0.609194	0.587826	773	tags=12%, list=6%, signal=11%	TRPV4/RGS2/TTLL7/LRPPRC
MF	GO:0047555	3',5'-cyclic-GMP phosphodiesterase activity	13	0.814483	1.51026	0.0761539	0.609194	0.587826	1452	tags=46%, list=11%, signal=41%	PDE9A/PDE6C/PDE6H/PDE2A/PDE6A/PDE11A
BP	GO:0035773	insulin secretion involved in cellular response to glucose stimulus	53	0.615916	1.40158	0.0762332	0.609194	0.587826	179	tags=8%, list=1%, signal=7%	GCG/CFTR/PDX1/RFX6
BP	GO:0060326	cell chemotaxis	206	-0.475032	-1.27915	0.0763636	0.609194	0.587826	1358	tags=20%, list=11%, signal=18%	PRKCQ/GPR183/PIP5K1C/PRSS56/CXCL8/MOSPD2/MST1/CCR4/CXCL2/THBS1/CMKLR1/ADAM8/CKLF/SLAMF8/TIRAP/CNR2/RAC2/WNT5A/PLA2G1B/XCR1/PIK3CD/PTPRO/CCR1/C5AR1/VAV1/SWAP70/CXCL10/SAA1/CSF3R/PREX1/SYK/ITGB2/CALCA/LGMN/CSF1/CXCR3/NCKAP1L/AIF1/CCR7/CCL3/CSF1R
BP	GO:0046834	lipid phosphorylation	61	0.599649	1.39261	0.0764045	0.609194	0.587826	1573	tags=23%, list=12%, signal=20%	CERKL/PIK3R6/SOCS2/PIK3C2G/DGKA/CERK/SOCS7/SPHK2/TTC7A/CISH/SMG1/DGKB/PIP5K1A/PIP4K2A
BP	GO:0022602	ovulation cycle process	36	0.652364	1.42458	0.0764463	0.609194	0.587826	1256	tags=25%, list=10%, signal=23%	ADAMTS1/SLIT2/PGR/NRIP1/TGFB2/SRC/PDGFRA/PTPRN/SLIT3
BP	GO:0055070	copper ion homeostasis	14	-0.76466	-1.39965	0.0766208	0.609194	0.587826	1674	tags=29%, list=13%, signal=25%	ATOX1/COX19/CCDC22/SLC31A2
MF	GO:0008374	O-acyltransferase activity	38	-0.64988	-1.38638	0.0766284	0.609194	0.587826	1308	tags=24%, list=10%, signal=21%	HHAT/AGPAT5/LCAT/MOGAT2/LPCAT2/PRDX6/DGAT2/GPAT3/AGPAT4
BP	GO:0043525	positive regulation of neuron apoptotic process	43	-0.634003	-1.38469	0.0766355	0.609194	0.587826	513	tags=16%, list=4%, signal=16%	GRN/GRIK2/MYBL2/MYB/FASLG/CDK5R1/CCL3
BP	GO:0050854	regulation of antigen receptor-mediated signaling pathway	43	-0.63628	-1.38966	0.0766355	0.609194	0.587826	1135	tags=28%, list=9%, signal=26%	PHPT1/TESPA1/DUSP3/FCRL3/BLK/SH2D1A/PTPRC/LPXN/PAX5/ADA/CCR7/RUNX1
BP	GO:0009991	response to extracellular stimulus	372	0.467414	1.28835	0.0769231	0.609194	0.587826	1076	tags=14%, list=8%, signal=13%	AOC1/SST/FOLR2/CYP24A1/PDX1/SLC6A19/ATF3/NPY/TH/SGIP1/CLEC16A/MIOS/CYP27B1/SLC10A1/GCN1/SZT2/RPS19/EIF2AK3/SCTR/PHEX/SLC16A1/ACACB/HMOX1/LDLR/ALPL/HTR4/NUAK1/SEH1L/PPARGC1A/NCOA1/PPM1D/WNT11/LRRK2/ITGA2/DDIT3/SLC38A3/LIPG/ADIPOR2/SIK1/RPTOR/VGF/CPS1/PROX1/EIF2A/SRC/HSPA8/EIF2S1/INHBB/ULK1/CPT1A/CPEB4/SLC25A25/PRKAG2
BP	GO:0033047	regulation of mitotic sister chromatid segregation	41	-0.641705	-1.39233	0.0769231	0.609194	0.587826	2056	tags=41%, list=16%, signal=35%	LCMT1/PCID2/BUB1/KNTC1/MAD2L1/NDC80/CDT1/DYNC1LI1/FBXO5/PLK1/BUB3/NUMA1/AURKB/CDC20/MAD2L1BP/GEN1/CCNB1
BP	GO:0034982	mitochondrial protein processing	12	0.787878	1.42898	0.0769231	0.609194	0.587826	614	tags=8%, list=5%, signal=8%	LRRK2
BP	GO:0045576	mast cell activation	42	-0.641815	-1.39763	0.0769231	0.609194	0.587826	827	tags=24%, list=7%, signal=22%	GATA2/CNR2/RAC2/BLK/PIK3CD/RHOH/SYK/CD84/LCP2/CLNK
CC	GO:0099146	intrinsic component of postsynaptic density membrane	42	-0.64138	-1.39669	0.0769231	0.609194	0.587826	750	tags=19%, list=6%, signal=18%	GRID2/LRRC4B/CLSTN1/PTPRS/SHISA9/CNIH2/SLITRK3/SLC30A1
CC	GO:0019005	SCF ubiquitin ligase complex	51	-0.603921	-1.37032	0.0771993	0.60951	0.588131	2574	tags=29%, list=20%, signal=24%	FBXO45/CCNF/FBXO6/FBXO25/USP47/CUL4A/CKS1B/FBXL16/FBXL22/SPSB4/FBXO9/FBXW8/FBXO4/FBXL15/FBXO32
MF	GO:0003823	antigen binding	29	-0.676108	-1.39758	0.0772277	0.60951	0.588131	1488	tags=48%, list=12%, signal=43%	TAP2/IGLL1/CLEC4M/SIRPA/SLC7A5/HLA-A/ABO/CD48/HLA-G/HLA-DPA1/MFAP4/DHCR24/SLC7A9/HLA-DPB1
MF	GO:0035255	ionotropic glutamate receptor binding	22	-0.711345	-1.41684	0.0773694	0.60951	0.588131	706	tags=27%, list=6%, signal=26%	RAPSN/CACNG3/DRD2/NSF/NETO2/CDK5R1
BP	GO:0045862	positive regulation of proteolysis	272	-0.449269	-1.24444	0.0774775	0.60951	0.588131	1771	tags=18%, list=14%, signal=16%	GBA/CFLAR/NFE2L2/CASP1/SIRT2/PLK1/XDH/CSNK1A1/IFT57/BBS7/MEFV/DAB2IP/SLC1A1/ACER2/GSN/BCAP31/GRN/SMAD7/EGLN3/SNCA/ADAM8/CTSD/CEBPA/CCDC22/ROBO1/PRICKLE1/TANK/ATXN3/CIDEB/FBXW8/AURKA/RNF19B/TRAF2/DET1/CTSC/CDC20/GRIN1/RNF14/PERP/CLU/ADRA2A/SYK/PSME2/FASLG/LGMN/CYFIP2/APOE/TNFRSF1B
BP	GO:0043488	regulation of mRNA stability	157	0.514605	1.33896	0.0776053	0.60951	0.588131	1049	tags=10%, list=8%, signal=9%	PABPC4/IGF2BP1/IGF2BP2/RPS27A/FASTKD5/CSDC2/HSPB1/RBM24/AXIN2/FUS/UBA52/IGF2BP3/HSPA8/PABPC1/UPF1/MOV10
BP	GO:1900221	regulation of amyloid-beta clearance	11	-0.785402	-1.41242	0.0776515	0.60951	0.588131	921	tags=27%, list=7%, signal=25%	CYP51A1/CLU/APOE
BP	GO:0043243	positive regulation of protein-containing complex disassembly	25	0.705819	1.45174	0.0776892	0.60951	0.588131	1081	tags=16%, list=9%, signal=15%	TRPV4/SEMA5A/ACTN2/INSR
BP	GO:0060249	anatomical structure homeostasis	373	-0.42469	-1.21197	0.0778342	0.60951	0.588131	1373	tags=17%, list=11%, signal=16%	CLDN12/BRCA2/LRRK1/ATP6AP1/CNGB1/TERF1/CD38/CHRNA1/PRKCQ/SGCZ/CIB2/TNFRSF11B/SLC1A1/CALB2/PIGR/KRAS/PARP3/SLC8A2/PRIM2/TYRO3/GAA/CSK/SMC5/ADGRV1/ADAM8/P2RY1/GATA2/LAMP2/TP53INP2/MAK/RB1/SLC22A5/TFRC/RAC2/FBXO4/PFKM/SIGLEC15/NXNL2/B2M/TERT/AURKB/ATP2B1/HOMER2/NEK2/CLDN5/CCNE2/TMEM119/SYK/CALCA/CA2/TLR9/AIPL1/SASH3/INPP5D/CSF1/DMD/ESRRB/LYZ/ITGB3/CSF1R/HAMP/NELL2/DCLRE1A
MF	GO:0008238	exopeptidase activity	72	-0.563416	-1.33875	0.0779221	0.60951	0.588131	1035	tags=14%, list=8%, signal=13%	CPVL/PRSS16/CPB2/NAALADL1/SCPEP1/PRCP/CTSC/CPQ/METAP2/F11
BP	GO:0048714	positive regulation of oligodendrocyte differentiation	21	-0.72393	-1.43297	0.0779727	0.60951	0.588131	188	tags=33%, list=1%, signal=33%	TP73/HDAC2/PTPRZ1/SHH/CXCR4/TENM4/TNFRSF1B
BP	GO:0046631	alpha-beta T cell activation	91	-0.538052	-1.31264	0.0780399	0.60951	0.588131	1001	tags=25%, list=8%, signal=23%	LOXL3/EBI3/CD55/SMAD7/CRTAM/HLA-A/SLAMF6/MYB/LY9/ZAP70/PTPRC/RUNX3/IRF1/ADA/SYK/SASH3/PTGER4/NCKAP1L/CD3E/ITK/TWSG1/CD274/RUNX1
BP	GO:0017148	negative regulation of translation	111	0.549059	1.37371	0.078125	0.60951	0.588131	1095	tags=14%, list=9%, signal=12%	IGF2BP1/RGS2/IGF2BP2/CAPRIN2/RPL13A/EIF2AK3/RPS3/RBM24/AGO4/IGF2BP3/EIF2S1/UPF1/CPEB4/MOV10/CAPRIN1
CC	GO:0022624	proteasome accessory complex	23	-0.697016	-1.39486	0.078125	0.60951	0.588131	176	tags=13%, list=1%, signal=13%	PSMD10/PSMD9/PSME2
BP	GO:0050796	regulation of insulin secretion	145	0.520265	1.34384	0.0786517	0.60951	0.588131	1053	tags=12%, list=8%, signal=12%	GCG/CFTR/PDX1/CACNA1C/ISL1/RFX6/NEUROD1/SLC16A1/STXBP5L/NR0B2/KCNC2/SSTR5/NR1D1/FAM3D/INHBB/CPT1A/HIF1A/ANO1
BP	GO:0070509	calcium ion import	63	0.591904	1.37689	0.0786517	0.60951	0.588131	433	tags=11%, list=3%, signal=11%	GCG/TRPV4/CACNA1C/SLC8A3/PLN/CACNA1B/MICU3
BP	GO:1902622	regulation of neutrophil migration	31	-0.659219	-1.36872	0.0787402	0.60951	0.588131	1407	tags=45%, list=11%, signal=40%	LBP/RHOG/EDN1/FUT7/CXCL8/MOSPD2/ADAM8/SLAMF8/TIRAP/RAC2/C5AR1/RHOH/NCKAP1L/CCR7
MF	GO:1990841	promoter-specific chromatin binding	48	0.63587	1.41814	0.0788288	0.60951	0.588131	1516	tags=25%, list=12%, signal=22%	PDX1/ISL1/TRIM28/HDAC4/PPARGC1A/RBL2/PRDM15/CHD7/DHX9/PRDM1/MYOD1/HSF1
BP	GO:0060193	positive regulation of lipase activity	54	-0.59754	-1.36303	0.078853	0.60951	0.588131	647	tags=17%, list=5%, signal=16%	P2RY12/GNAQ/BDNF/PLA2G1B/P2RY6/C5AR1/NTRK2/ITK/APOA4
BP	GO:0000959	mitochondrial RNA metabolic process	41	0.637178	1.40756	0.0788913	0.60951	0.588131	949	tags=12%, list=7%, signal=11%	FASTKD5/PPARGC1B/LRPPRC/SARS2/MTO1
BP	GO:0016266	O-glycan processing	38	0.646541	1.42599	0.0791667	0.60951	0.588131	970	tags=21%, list=8%, signal=20%	MUC13/MUC5AC/MUC3A/GALNT3/GALNT9/GALNT10/ST3GAL2/GALNT13
BP	GO:0071549	cellular response to dexamethasone stimulus	29	-0.673494	-1.39217	0.0792079	0.60951	0.588131	2039	tags=34%, list=16%, signal=29%	STAR/SRD5A1/CFLAR/RPS6KB1/ICAM1/AQP1/CRH/DDIT4/FBXO32/ASS1
BP	GO:0034694	response to prostaglandin	22	-0.708204	-1.41058	0.0793037	0.60951	0.588131	119	tags=18%, list=1%, signal=18%	EDN1/APOB/PTGER4/CCR7
BP	GO:0008655	pyrimidine-containing compound salvage	10	-0.798976	-1.40613	0.0793951	0.60951	0.588131	511	tags=50%, list=4%, signal=48%	CDA/UPP1/DCK/UCKL1/TK1
CC	GO:0031209	SCAR complex	10	-0.799299	-1.4067	0.0793951	0.60951	0.588131	1523	tags=40%, list=12%, signal=35%	CYFIP1/SRA1/ABI1/NCKAP1L
BP	GO:0043097	pyrimidine nucleoside salvage	10	-0.798976	-1.40613	0.0793951	0.60951	0.588131	511	tags=50%, list=4%, signal=48%	CDA/UPP1/DCK/UCKL1/TK1
BP	GO:0046643	regulation of gamma-delta T cell activation	10	-0.802885	-1.41301	0.0793951	0.60951	0.588131	294	tags=30%, list=2%, signal=29%	PTPRC/SYK/NCKAP1L
BP	GO:1901678	iron coordination entity transport	10	-0.802554	-1.41243	0.0793951	0.60951	0.588131	2394	tags=60%, list=19%, signal=49%	HPX/LTF/SLC48A1/SLC46A1/FLVCR1/FLVCR2
BP	GO:0042730	fibrinolysis	20	-0.717759	-1.41507	0.0794574	0.60951	0.588131	1114	tags=35%, list=9%, signal=32%	THBS1/CPB2/PLAUR/GP1BA/PLAU/SERPING1/F11
BP	GO:0030168	platelet activation	126	-0.500619	-1.27933	0.0795053	0.60951	0.588131	1358	tags=21%, list=11%, signal=19%	PRKCQ/P2RY12/CSRP1/GNAQ/TYRO3/BLOC1S3/C1GALT1C1/TEC/TEC/F2RL2/P2RY1/PLEK/DMTN/PDPN/BLK/SELP/GP1BA/VAV1/PIK3R5/SAA1/ADRA2A/SYK/LCP2/GP9/ITGB3/GP1BB/APOE
BP	GO:0045947	negative regulation of translational initiation	16	0.754262	1.43496	0.0795229	0.60951	0.588131	2361	tags=50%, list=19%, signal=41%	RPL13A/EIF2AK3/EIF2S1/EIF2AK4/EIF3E/RBM4/TPR/EIF4EBP3
BP	GO:0055003	cardiac myofibril assembly	16	0.751343	1.42941	0.0795229	0.60951	0.588131	2491	tags=50%, list=20%, signal=40%	CSRP3/NEB/NEBL/PROX1/PDGFRA/SRF/TTN/ACTC1
BP	GO:0002683	negative regulation of immune system process	256	-0.451375	-1.2423	0.0797101	0.610312	0.588905	1460	tags=23%, list=11%, signal=21%	GPR68/GPX1/NLRX1/MIF/CST7/PHPT1/BCL6/INHBA/TLR3/TMBIM6/PARP3/TYRO3/THBS1/DUSP3/CD200R1/FCRL3/GRN/LOXL3/CD55/MAFB/SAMSN1/SMAD7/C4BPA/CRTAM/TGFB3/GATA2/HLA-A/SLAMF8/CNR2/NRARP/DRD2/CD200/HAVCR2/BLK/SH2D1A/IL1RL1/HLA-G/ZBTB46/ADTRP/TIGIT/ADCYAP1/PTPRC/A2M/RUNX3/LPXN/TAPBPL/IRF1/PGLYRP2/ADA/LRRC32/SERPING1/CD84/INPP5D/PTGER4/C1QC/TWSG1/CD274/CCL3/RUNX1/CLNK
BP	GO:0006897	endocytosis	452	-0.415675	-1.19701	0.079929	0.611353	0.589909	1851	tags=19%, list=15%, signal=17%	RALBP1/ENDOU/RAMP1/C3/CBL/CEL/APOB/BIN2/SHH/CACNG3/CD22/RAB7A/C4B/CAV2/RAMP2/XKR8/DOCK2/TMPRSS4/RAB17/AHI1/IGLL1/DENND1C/CLEC4M/PACSIN2/PIP5K1C/ATP6V1H/ANK2/EPHA3/VTN/SNAP91/CXCL8/DKK1/GSN/RAB22A/THBS1/ELMO1/LOXL3/SIGLEC1/GHR/C4BPA/SNCA/TEX261/LOXL4/GATA2/CDH13/CD63/AP3M2/DRD2/CTTN/TFRC/RAC2/WNT5A/UNC119/B2M/SNX5/MLC1/TOR1A/PSTPIP1/SNAP25/RHOH/FCGR1A/NECAP1/NEDD4L/CRP/ASGR2/CFI/CD6/STX1B/SAA1/CLU…
MF	GO:0008569	ATP-dependent microtubule motor activity, minus-end-directed	11	0.793217	1.41391	0.0801688	0.612553	0.591067	2144	tags=55%, list=17%, signal=45%	DYNC2H1/KIFC3/DNAH10/DNAH5/DNAH2/DYNC1H1
BP	GO:0016233	telomere capping	34	-0.648996	-1.35356	0.0803922	0.613144	0.591638	569	tags=15%, list=4%, signal=14%	TERF1/PRKCQ/AURKB/NEK2/DCLRE1A
BP	GO:0031069	hair follicle morphogenesis	22	0.723012	1.41725	0.0804124	0.613144	0.591638	1486	tags=36%, list=12%, signal=32%	FST/FGFR2/TGFB2/NOTCH1/FGF7/FOXQ1/SMO/KRT27
MF	GO:0008013	beta-catenin binding	77	0.574481	1.38598	0.08061	0.613651	0.592127	1986	tags=23%, list=16%, signal=20%	PTPRJ/VCL/SETD1A/TCF7/SHROOM2/AXIN2/SLC9A3R2/DLG5/CXADR/BCL9/PTPRU/PTPRT/CTNND2/CHD8/LEF1/GRIP1/KLF4/NUMB
BP	GO:0070873	regulation of glycogen metabolic process	30	0.674011	1.4292	0.0806452	0.613651	0.592127	5	tags=3%, list=0%, signal=3%	INS
BP	GO:0032649	regulation of interferon-gamma production	61	-0.588942	-1.37081	0.0807899	0.613717	0.592191	1273	tags=41%, list=10%, signal=37%	INHBA/TLR3/LTA/SIRPA/SLC7A5/EBI3/CRTAM/HLA-A/HAVCR2/WNT5A/IL1RL1/CD2/RASGRP1/SLAMF6/HLA-DPA1/TLR7/CD276/PGLYRP2/TLR9/SASH3/HLA-DPB1/CD3E/CCR7/CD274/IRF8
MF	GO:0015106	bicarbonate transmembrane transporter activity	14	0.764557	1.43064	0.0811359	0.613717	0.592191	867	tags=43%, list=7%, signal=40%	CFTR/SLC39A8/SLC26A6/SLC26A5/SLC4A10/SLC4A3
BP	GO:0060401	cytosolic calcium ion transport	126	-0.498564	-1.27408	0.0812721	0.613717	0.592191	1435	tags=25%, list=11%, signal=23%	CASQ1/EPO/DHRS7C/MCOLN3/CASQ2/SLC8A1/RGS9/SLC24A2/PSEN2/ANK2/JPH3/TMBIM6/JPH1/SLC8A2/FKBP1B/MICU1/MICU2/SNCA/DRD2/PLA2G1B/XCR1/GRIN1/P2RY6/ATP2B1/CXCL10/PTPRC/TMEM38A/FASLG/DMD/CCR7/CCL3/GRIN2C
BP	GO:1903313	positive regulation of mRNA metabolic process	69	-0.56375	-1.32619	0.0813309	0.613717	0.592191	509	tags=7%, list=4%, signal=7%	FTO/ZC3HAV1/PRDX6/CCNB1/NANOS2
BP	GO:0001779	natural killer cell differentiation	15	-0.744955	-1.38865	0.0813492	0.613717	0.592191	1673	tags=40%, list=13%, signal=35%	KAT7/TUSC2/TYRO3/PIK3CD/PTPRC/PGLYRP2
BP	GO:0002703	regulation of leukocyte mediated immunity	128	-0.497063	-1.27299	0.0814159	0.613717	0.592191	1324	tags=26%, list=10%, signal=23%	LAMP1/BCL6/ICAM1/TLR3/LTA/PARP3/MR1/MLH1/SMAD7/C4BPA/CRTAM/GATA2/HLA-A/TFRC/RAC2/HAVCR2/BLK/SH2D1A/B2M/TRAF2/HLA-G/RASGRP1/SLAMF6/VAV1/PTPRC/WAS/SYK/ITGB2/SASH3/CD84/SH2D1B/CLNK/TNFRSF1B
BP	GO:0018206	peptidyl-methionine modification	11	-0.783726	-1.4094	0.0814394	0.613717	0.592191	74	tags=45%, list=1%, signal=45%	NAA25/METAP1D/METAP1/APOA1/METAP2
BP	GO:0021915	neural tube development	131	0.528248	1.34401	0.081448	0.613717	0.592191	1123	tags=11%, list=9%, signal=11%	TBC1D32/LRP2/SEMA4C/STIL/LRP6/C2CD3/VANGL2/RPS7/SEMA3C/CELSR1/TGFB2/NOTCH1/PROX1/HIF1A/TSC2
BP	GO:0050714	positive regulation of protein secretion	100	0.556029	1.36915	0.081448	0.613717	0.592191	510	tags=7%, list=4%, signal=7%	GCG/CFTR/PDX1/ISL1/RFX6/APBB1/NR0B2
BP	GO:1903793	positive regulation of anion transport	376	0.46452	1.28289	0.0815348	0.613717	0.592191	1439	tags=13%, list=11%, signal=12%	GCG/INS/PDZK1/FZD5/CFTR/ACSL5/PDX1/XPO4/ISL1/RFX6/TRIM28/ENPP7/ACTB/SLC12A2/APBB1/SLC26A6/IPO5/CLIP3/NR0B2/PCM1/CHRNB2/ANK3/SLC38A3/LIPG/ADIPOR2/HSP90AB1/TENM1/TGFB2/PLA2R1/SRC/ADAM9/NR4A3/SEC16A/SEC16B/HIF1A/ANO1/INSR/ZDHHC2/NPY2R/DHX9/CAMK1/PLA2G4A/PTCH1/KHDRBS1/GALR1/PTPN23/LDLRAP1/ACSL1/SIRT3/SMO
MF	GO:0004112	cyclic-nucleotide phosphodiesterase activity	23	0.716619	1.43077	0.0816327	0.613717	0.592191	1452	tags=43%, list=11%, signal=39%	PDE8B/PDE9A/PDE7B/PDE3A/PDE6C/PDE6H/PDE2A/PDE6A/PDE4A/PDE11A
BP	GO:0031114	regulation of microtubule depolymerization	25	0.703742	1.44747	0.0816733	0.613717	0.592191	258	tags=8%, list=2%, signal=8%	TRPV4/TRIM54
BP	GO:0002697	regulation of immune effector process	251	-0.45086	-1.24275	0.0819964	0.613717	0.592191	1280	tags=24%, list=10%, signal=22%	VTN/BCL6/ICAM1/TLR3/LTA/TMBIM6/PARP3/MR1/CFB/MLH1/SLC7A5/FCRL3/GRN/LOXL3/CD55/SMAD7/CPB2/C4BPA/CRTAM/TGFB3/TRIL/GATA2/HLA-A/SLAMF8/XBP1/SEMA7A/TFRC/RAC2/HAVCR2/WNT5A/BLK/SH2D1A/B2M/TRAF2/HLA-G/IL17F/RASGRP1/SLAMF6/MYB/C5AR1/VAV1/CFI/CLU/PTPRC/A2M/PGLYRP2/WAS/SYK/ITGB2/TLR9/SASH3/SERPING1/CD84/C1QA/CFP/C1QC/SH2D1B/CLNK/TNFRSF1B
BP	GO:0048284	organelle fusion	122	-0.501879	-1.27238	0.0819964	0.613717	0.592191	2166	tags=26%, list=17%, signal=22%	ENO2/VPS8/RAB3A/VPS41/TAP1/VPS18/VAMP3/CDK1/VAV3/VAT1/STX8/RAB7A/CAV2/TAP2/VTI1A/USP30/SNAPIN/CYP26C1/CPLX1/SNCA/PRRT2/PLD6/TFRC/CHP1/TMEM175/GDAP1/SNAP25/VPS4A/VPS11/STX1B/STX2/ANXA2
BP	GO:0002237	response to molecule of bacterial origin	219	-0.465865	-1.26519	0.0821429	0.613717	0.592191	1789	tags=22%, list=14%, signal=19%	EDN1/APOB/EPO/S100A14/C4B/CASP1/SIRT2/NFKBIL1/VIM/RPS6KB1/AKAP12/SRR/DAB2IP/CXCL8/ICAM1/LTA/CITED1/CXCL2/SIRPA/CD55/SNCA/XBP1/TIRAP/CNR2/PTGIR/HAVCR2/WNT5A/B2M/SELP/CYP1A1/TLR1/C5AR1/IL36G/CD6/CXCL10/SIGIRR/IFNAR1/TLR9/FASLG/ASS1/PTGER4/CCR7/CD274/CSF2RB/IRF8/CCL3/TNFRSF1B/HAMP
BP	GO:0032768	regulation of monooxygenase activity	50	0.616917	1.39284	0.0822222	0.613717	0.592191	776	tags=12%, list=6%, signal=11%	INS/DDAH1/CYP27B1/ACVR2A/GFI1/WASL
BP	GO:0051896	regulation of protein kinase B signaling	176	0.499303	1.31644	0.0822511	0.613717	0.592191	1156	tags=12%, list=9%, signal=11%	INS/KLB/LRP2/AREG/TGFBR1/PTPRJ/FGFR2/MAGI2/SEMA5A/HGF/HIP1/DDIT3/FGF5/HSP90AB1/SRC/FGF7/FGF18/INSR/TSC2/PDGFRA/RICTOR
BP	GO:0071470	cellular response to osmotic stress	33	0.656348	1.4155	0.0823045	0.613717	0.592191	444	tags=9%, list=3%, signal=9%	TRPV4/MYLK/SCN2A
BP	GO:0045444	fat cell differentiation	177	0.500039	1.3212	0.0824295	0.613717	0.592191	1181	tags=13%, list=9%, signal=12%	INS/ZNF516/ANKRD26/RGS2/TPH1/NR4A1/PLAC8/CCDC3/CLIP3/ASXL1/PPARGC1A/DDIT3/CREB1/MEX3C/ARID5B/NR1D1/INHBB/NR4A3/GDF6/ZFPM1/PDGFRA/PRLH/ZBTB7A
BP	GO:0021859	pyramidal neuron differentiation	10	0.797931	1.40758	0.0824524	0.613717	0.592191	1461	tags=50%, list=11%, signal=44%	FGFR2/SLC4A10/ZMIZ1/PLXNA3/SCYL2
BP	GO:0048521	negative regulation of behavior	13	0.770525	1.42875	0.0826613	0.613717	0.592191	5	tags=8%, list=0%, signal=8%	INS
BP	GO:0060081	membrane hyperpolarization	13	0.770383	1.42849	0.0826613	0.613717	0.592191	475	tags=15%, list=4%, signal=15%	CFTR/KCTD7
BP	GO:0035821	modulation of process of other organism	86	-0.540903	-1.3115	0.0827206	0.613717	0.592191	381	tags=10%, list=3%, signal=10%	AQP1/SMARCA4/CRP/ANXA2/SYK/CCL3/CSF1R/APOE/MPEG1
CC	GO:0005770	late endosome	218	-0.467285	-1.26476	0.0827338	0.613717	0.592191	1786	tags=22%, list=14%, signal=20%	TMEM192/SPPL2A/MCOLN3/STX8/RAB7A/LAMTOR5/MMD/SLC38A9/STARD3/RHOB/VPS33A/CXCR4/LAPTM4A/VTI1A/CST7/LAMP1/SLC1A1/TMEM106B/LAMP5/PRKAR1B/SLC29A3/TSPAN15/TMEM9/RAB22A/RNF13/MR1/VPS33B/GRN/SIGLEC1/CDIP1/PARM1/LAMP2/MYO5A/CD63/VPS35/VPS4A/VPS11/TMEM59/NEDD4L/SLC30A4/CTSS/PSAP/SLC31A2/IFNAR1/ANXA2/CYB561A3/LGMN/MAP2K1/ABHD6
BP	GO:0030183	B cell differentiation	96	-0.530244	-1.30262	0.0827338	0.613717	0.592191	1337	tags=18%, list=11%, signal=16%	GPR183/BCL6/INHBA/CD27/FCRL3/SLAMF8/XBP1/LYL1/MFNG/ADGRG3/PTPRC/HDAC9/ADA/SYK/TLR9/INPP5D/NCKAP1L
BP	GO:0006488	dolichol-linked oligosaccharide biosynthetic process	18	-0.722016	-1.39459	0.0828402	0.613717	0.592191	2053	tags=28%, list=16%, signal=23%	SRD5A3/ALG2/ALG8/DHDDS/RFT1
BP	GO:0120009	intermembrane lipid transfer	36	-0.644212	-1.36188	0.0830116	0.613717	0.592191	2039	tags=28%, list=16%, signal=23%	STAR/GRAMD1C/APOA1/GRAMD1B/APOB/PLTP/NPC2/STARD3/APOE/APOA4
MF	GO:0120013	lipid transfer activity	36	-0.644212	-1.36188	0.0830116	0.613717	0.592191	2039	tags=28%, list=16%, signal=23%	STAR/GRAMD1C/APOA1/GRAMD1B/APOB/PLTP/NPC2/STARD3/APOE/APOA4
BP	GO:0071459	protein localization to chromosome, centromeric region	22	-0.703599	-1.40141	0.0831721	0.613717	0.592191	2002	tags=45%, list=16%, signal=38%	NDC80/CDT1/CDK1/BUB3/SMC5/CENPQ/RB1/CENPT/ZWILCH/AURKB
BP	GO:0045839	negative regulation of mitotic nuclear division	44	-0.625468	-1.37182	0.0831793	0.613717	0.592191	2056	tags=36%, list=16%, signal=31%	LCMT1/PCID2/BUB1/KNTC1/MAD2L1/NDC80/CDT1/DYNC1LI1/FBXO5/PLK1/BUB3/AURKB/CDC20/MAD2L1BP/GEN1/CCNB1
BP	GO:0045589	regulation of regulatory T cell differentiation	15	-0.73924	-1.378	0.0833333	0.613717	0.592191	1278	tags=33%, list=10%, signal=30%	BCL6/FANCD2/HLA-G/IRF1/RUNX1
BP	GO:1903055	positive regulation of extracellular matrix organization	20	-0.713587	-1.40684	0.0833333	0.613717	0.592191	962	tags=40%, list=8%, signal=37%	RGCC/CFLAR/DDR2/CPB2/PHLDB1/RB1/PDPN/RUNX1
BP	GO:0007051	spindle organization	157	-0.484717	-1.26873	0.0834846	0.613717	0.592191	2249	tags=26%, list=18%, signal=22%	PIBF1/HAUS5/MISP/CCSAP/MAP9/RHOA/NDC80/STMN1/NEK6/FBXO5/PLK1/KIF11/TRIM36/MAP10/AUNIP/DLGAP5/KIF23/GNAI1/PARP3/TUBG1/CEP126/STAG1/MLH1/FSD1/SPICE1/HAUS4/MAPRE3/TPX2/NUMA1/RGS14/NUF2/AURKA/AURKB/CENPJ/CDC20/MYBL2/NEK2/PRC1/PKD1/CCNB1/EML1
BP	GO:0043114	regulation of vascular permeability	32	0.66294	1.42181	0.0835031	0.613717	0.592191	908	tags=25%, list=7%, signal=23%	TRPV4/DDAH1/SLIT2/PTPRJ/PDE3A/TJP1/PDE2A/SRC
BP	GO:0070232	regulation of T cell apoptotic process	21	-0.71859	-1.4224	0.0838207	0.613717	0.592191	1549	tags=38%, list=12%, signal=34%	TSC22D3/PRKCQ/CD27/ADAM8/WNT5A/SLC46A2/ADA/CD274
BP	GO:0015748	organophosphate ester transport	100	-0.522169	-1.29545	0.0839286	0.613717	0.592191	268	tags=8%, list=2%, signal=8%	CALHM1/SLC4A1/XKR5/ATP8B1/FASLG/ABCC5/APOE/APOA4
CC	GO:0072686	mitotic spindle	130	-0.493673	-1.2661	0.0839286	0.613717	0.592191	2212	tags=27%, list=17%, signal=22%	HAUS5/CDC27/MISP/EML4/CCSAP/MAP9/MAD2L1/CUL3/CDK1/SIRT2/PLK1/KIF11/MAP10/KIF23/NUDCD2/TUBG1/TMEM9/STAG1/CDC6/CKAP2L/HAUS4/MAPRE3/TPX2/TADA3/NUMA1/CEP170/MAK/CTTN/SKA3/AURKA/AURKB/NUSAP1/PRC1/TBCK/EML1
BP	GO:0034248	regulation of cellular amide metabolic process	348	0.459674	1.27105	0.0841121	0.613717	0.592191	1553	tags=16%, list=12%, signal=15%	IGF2BP1/RGS2/IGF2BP2/EIF3H/CAPRIN2/GCN1/ENPP7/EIF3C/RPS9/RPL13A/EIF2AK3/PDK1/RPS3/CSDE1/EIF3B/RPS14/RPL30/HSPB1/RBM24/SAMD8/ITGA2/AGO4/RPL10/SPHK2/RPL26/PASK/RPS4X/EIF2S3/NEURL1/LRPPRC/IGF2BP3/SECISBP2L/EIF2A/QKI/RPS6KA3/EIF2S1/PABPC1/UPF1/RPL22/CPEB4/MOV10/CAPRIN1/PGAM1/DDX1/DHX9/GIGYF2/KHDRBS1/PDPR/CHRNA7/PUM1/SIRT3/EIF4G1/MTIF2/RPS6KB2/PIWIL1/TNRC6A
BP	GO:0008406	gonad development	161	0.507792	1.32401	0.0842572	0.613717	0.592191	1256	tags=14%, list=10%, signal=12%	LRP2/FST/ADAMTS1/TGFBR1/SLIT2/ACVR2A/CSDE1/PGR/NCOA1/PCYT1B/SIX4/AGO4/NRIP1/VGF/TGFB2/KDM5A/SRC/ARID5B/INHBB/PDGFRA/PTPRN/SLIT3
BP	GO:0045137	development of primary sexual characteristics	166	0.504277	1.32037	0.0842572	0.613717	0.592191	1256	tags=13%, list=10%, signal=12%	LRP2/FST/ADAMTS1/TGFBR1/SLIT2/ACVR2A/CSDE1/PGR/NCOA1/PCYT1B/SIX4/AGO4/NRIP1/VGF/TGFB2/KDM5A/SRC/ARID5B/INHBB/PDGFRA/PTPRN/SLIT3
CC	GO:0098563	intrinsic component of synaptic vesicle membrane	41	-0.633602	-1.37475	0.0844278	0.613717	0.592191	2143	tags=34%, list=17%, signal=28%	RAB3A/DNAJC5/VAMP3/SYNGR1/RAB11B/RAB35/LAMP1/SYNPR/SYN1/TMEM163/PTPRS/SYPL1/PTPRN2/SLC17A7
BP	GO:0032881	regulation of polysaccharide metabolic process	37	0.641236	1.41137	0.0845361	0.613717	0.592191	5	tags=3%, list=0%, signal=3%	INS
MF	GO:0035613	RNA stem-loop binding	10	0.794557	1.40163	0.0845666	0.613717	0.592191	2388	tags=50%, list=19%, signal=41%	CSDE1/DHX9/ZC3H12A/RC3H2/MYH10
BP	GO:0009798	axis specification	65	0.582235	1.36496	0.0846325	0.613717	0.592191	860	tags=15%, list=7%, signal=14%	FZD5/PGAP1/WNT7A/CDX4/STIL/LRP6/C2CD3/DDIT3/MNS1/NOTCH1
BP	GO:0000725	recombinational repair	115	-0.511602	-1.28178	0.0846847	0.613717	0.592191	2007	tags=22%, list=16%, signal=18%	RMI2/PPP4C/SAMHD1/MCM6/MCM5/RBBP8/RAD51/MCM3/GINS4/BRCA2/AUNIP/MCM2/ACTR2/ZFYVE26/RAD54L/POLQ/MCM4/SMC5/DMC1/RHNO1/ZSWIM7/WAS/RAD51AP1/GEN1/SWI5
BP	GO:0007398	ectoderm development	13	-0.76779	-1.39337	0.0849802	0.613717	0.592191	1721	tags=38%, list=14%, signal=33%	SHH/ITGA6/FZD7/VPS52/STX2
BP	GO:0002693	positive regulation of cellular extravasation	10	-0.788996	-1.38857	0.0850662	0.613717	0.592191	1238	tags=30%, list=10%, signal=27%	ICAM1/ADAM8/PLVAP
BP	GO:0006054	N-acetylneuraminate metabolic process	10	-0.792571	-1.39486	0.0850662	0.613717	0.592191	974	tags=20%, list=8%, signal=18%	NPL/AMDHD2
BP	GO:0034380	high-density lipoprotein particle assembly	10	-0.788876	-1.38836	0.0850662	0.613717	0.592191	52	tags=30%, list=0%, signal=30%	LCAT/APOE/APOA4
BP	GO:0047484	regulation of response to osmotic stress	10	-0.788579	-1.38783	0.0850662	0.613717	0.592191	1724	tags=50%, list=14%, signal=43%	EPO/EFHD1/ARHGEF2/MICU1/MLC1
MF	GO:0016538	cyclin-dependent protein serine/threonine kinase regulator activity	37	-0.641835	-1.35847	0.0851064	0.613717	0.592191	484	tags=14%, list=4%, signal=13%	CCNB3/CCNA2/CCNE2/CCNB1/CDK5R1
BP	GO:0070227	lymphocyte apoptotic process	50	-0.599418	-1.35206	0.0851449	0.613717	0.592191	1549	tags=24%, list=12%, signal=21%	TSC22D3/PRKCQ/BCL6/CD27/ADAM8/WNT5A/BLK/AURKB/SLC46A2/ADA/FASLG/CD274
BP	GO:0042492	gamma-delta T cell differentiation	11	-0.780261	-1.40317	0.0852273	0.613717	0.592191	294	tags=27%, list=2%, signal=27%	PTPRC/SYK/NCKAP1L
BP	GO:0042754	negative regulation of circadian rhythm	11	-0.78096	-1.40443	0.0852273	0.613717	0.592191	1091	tags=36%, list=9%, signal=33%	PER2/CRH/DRD2/ADA
BP	GO:0061136	regulation of proteasomal protein catabolic process	144	-0.490702	-1.27406	0.0852995	0.613717	0.592191	1771	tags=19%, list=14%, signal=16%	GBA/SHH/NFE2L2/SIRT2/PLK1/CSNK1A1/BBS7/GPX1/DAB2IP/NUDT15/BCAP31/SMAD7/CEBPA/PRICKLE1/ATXN3/FBXW8/AURKA/RNF19B/DET1/CDC20/PBK/RNF14/PKD1/CLU/BAG5/PSME2/APOE
BP	GO:0030072	peptide hormone secretion	200	0.494232	1.32531	0.0853392	0.613717	0.592191	1053	tags=11%, list=8%, signal=10%	GCG/INS/CFTR/PDX1/CACNA1C/ISL1/RFX6/NEUROD1/SLC16A1/STXBP5L/NR0B2/KCNC2/PASK/RIMS2/VGF/SSTR5/NR1D1/FAM3D/INHBB/CPT1A/HIF1A/ANO1
BP	GO:0007368	determination of left/right symmetry	99	0.551238	1.35347	0.0853933	0.613717	0.592191	1502	tags=21%, list=12%, signal=19%	TBC1D32/DYNC2H1/HAND2/STIL/FOXJ1/ACVR2A/RTTN/TBX2/MEGF8/C2CD3/VANGL2/MMP21/NOTCH1/DNAI1/HIF1A/NOTCH2/HAND1/KIF3B/DNAH5/SMO/TBX22
BP	GO:0032885	regulation of polysaccharide biosynthetic process	32	0.657434	1.41	0.0855397	0.614172	0.592629	5	tags=3%, list=0%, signal=3%	INS
CC	GO:0070160	tight junction	106	0.550924	1.37227	0.0857788	0.61529	0.593708	1065	tags=18%, list=8%, signal=17%	AOC1/FZD5/TGFBR1/AMOT/CLDN11/ACTB/SAPCD2/MAGI2/CLDN10/SHROOM2/ANK3/CLDN1/TJP1/PARD6G/PARD3/LIN7B/CXADR/AMOTL2/ASH1L
BP	GO:0008154	actin polymerization or depolymerization	160	-0.48138	-1.26076	0.0859232	0.615486	0.593897	1402	tags=16%, list=11%, signal=15%	TMOD3/ACTR2/CATIP/ICAM1/ARHGAP28/ABI1/GSN/GMFG/TWF1/PLEK/DMTN/CTTN/ARPC1B/PSTPIP1/SWAP70/ADD2/DIAPH3/WAS/PREX1/SH3BP1/CYFIP2/NCKAP1L/AIF1/PSTPIP2/TMOD4/CCR7
CC	GO:0005923	bicellular tight junction	100	0.543957	1.33942	0.0859729	0.615486	0.593897	1715	tags=26%, list=13%, signal=23%	AOC1/FZD5/TGFBR1/AMOT/CLDN11/SAPCD2/MAGI2/CLDN10/SHROOM2/ANK3/CLDN1/TJP1/PARD6G/PARD3/LIN7B/CXADR/AMOTL2/ASH1L/ARHGAP17/ESAM/MARVELD2/CLDN20/MPP7/CLDN3/POF1B/FRMD4A
CC	GO:0043198	dendritic shaft	32	-0.653379	-1.36172	0.0861057	0.615839	0.594238	1622	tags=34%, list=13%, signal=30%	SLC8A1/PSEN2/RTN4R/SLC1A1/LZTS1/NSF/GRM7/PRKAR2B/CNIH2/PREX1/MAP2
MF	GO:0015172	acidic amino acid transmembrane transporter activity	14	-0.749512	-1.37193	0.086444	0.616282	0.594665	1316	tags=21%, list=10%, signal=19%	SLC1A1/SLC1A6/SLC17A7
BP	GO:0002218	activation of innate immune response	105	-0.519506	-1.29171	0.0866426	0.616282	0.594665	364	tags=9%, list=3%, signal=8%	TBK1/PSMB6/PSMB9/PSMB7/SYK/PSME2/PSMB8/CLEC10A/CLEC4D
BP	GO:0048771	tissue remodeling	128	-0.495828	-1.26982	0.0867257	0.616282	0.594665	1142	tags=20%, list=9%, signal=18%	LRRK1/ATP6AP1/MITF/CD38/TNFRSF11B/CSK/JAG1/DDR2/ADAM8/TGFB3/CELA1/TFRC/RAC2/SIGLEC15/FLT4/CTHRC1/TMEM119/SYK/CALCA/CA2/INPP5D/ITGB3/CSF1R/RUNX1/HAMP
MF	GO:0033613	activating transcription factor binding	69	0.563973	1.33696	0.0867679	0.616282	0.594665	1443	tags=20%, list=11%, signal=18%	ZNF516/HAND2/ISL1/NEUROD1/HDAC4/CREBBP/RBL2/CREB1/NCOR1/MYC/ZFPM1/ZBTB7A/MEF2D/MYOD1
BP	GO:1903532	positive regulation of secretion by cell	216	0.485496	1.31134	0.0868597	0.616282	0.594665	1053	tags=8%, list=8%, signal=8%	GCG/INS/NMB/CFTR/PDX1/ISL1/RFX6/SLC12A2/APBB1/NR0B2/CHRNB2/SPHK2/CREB1/TGFB2/ADAM9/INHBB/HIF1A/ANO1
BP	GO:0008089	anterograde axonal transport	44	-0.623263	-1.36698	0.0868762	0.616282	0.594665	1580	tags=39%, list=12%, signal=34%	BLOC1S5/BLOC1S6/ARL8B/SOD1/KIF5C/DTNBP1/SNAPIN/DLG2/KIF5A/NEFL/BLOC1S3/BLOC1S2/AP3M2/BORCS5/CNIH2/MAP2/MGARP
MF	GO:0004602	glutathione peroxidase activity	13	-0.763598	-1.38576	0.0869565	0.616282	0.594665	1456	tags=38%, list=11%, signal=34%	GPX1/MGST3/GPX5/GPX4/PRDX6
MF	GO:0005149	interleukin-1 receptor binding	10	-0.786048	-1.38338	0.0869565	0.616282	0.594665	398	tags=30%, list=3%, signal=29%	TLR5/IL36G/TLR9
BP	GO:0048705	skeletal system morphogenesis	175	0.497876	1.31379	0.0869565	0.616282	0.594665	1745	tags=21%, list=14%, signal=18%	TRPV4/WNT7A/TGFBR1/FGFR2/NAB1/LRP6/BMP1/SOX5/ROR2/ALPL/MEGF8/PAPPA2/PPARGC1B/SIX4/AXIN2/FMN1/MSX2/SP5/ARID5B/COL27A1/COL2A1/DSCAML1/FGF18/PDGFRA/PHOSPHO1/TRIP11/MEF2D/GREM1/GNAS/FUZ/ANKRD11/FGF4/STC1/HOXB5/FBN2/LRP5/SETD2
MF	GO:0015377	cation:chloride symporter activity	15	-0.736322	-1.37256	0.0873016	0.616282	0.594665	387	tags=20%, list=3%, signal=19%	SLC18A1/SLC12A9/SLC18A2
BP	GO:0045066	regulatory T cell differentiation	17	-0.721957	-1.38337	0.0873016	0.616282	0.594665	1407	tags=35%, list=11%, signal=31%	FUT7/BCL6/FANCD2/HLA-G/IRF1/RUNX1
BP	GO:1902101	positive regulation of metaphase/anaphase transition of cell cycle	15	-0.737439	-1.37464	0.0873016	0.616282	0.594665	2196	tags=40%, list=17%, signal=33%	CDC27/CDT1/CUL3/DLGAP5/RB1/MAD2L1BP
BP	GO:0007091	metaphase/anaphase transition of mitotic cell cycle	58	-0.591825	-1.36551	0.087344	0.616282	0.594665	2196	tags=40%, list=17%, signal=33%	LCMT1/PCID2/BUB1/KNTC1/CDC27/MAD2L1/NDC80/CDT1/CUL3/NEK6/DYNC1LI1/FBXO5/PLK1/BUB3/DLGAP5/CDC6/UBE2C/RB1/AURKB/CDC20/MAD2L1BP/GEN1/CCNB1
BP	GO:0045638	negative regulation of myeloid cell differentiation	58	-0.591289	-1.36427	0.087344	0.616282	0.594665	1704	tags=26%, list=13%, signal=22%	CUL4A/CIB1/HOXA5/NCAPG2/GPR68/INHBA/TLR3/TAL1/MAFB/GATA2/ZBTB46/INPP5D/C1QC/KLF13/CCL3
CC	GO:0030684	preribosome	71	0.556978	1.33001	0.08742	0.616282	0.594665	1433	tags=15%, list=11%, signal=14%	NSA2/RPS7/UTP20/HEATR1/PPAN/MDN1/WDR74/MRTO4/PDCD11/WDR36/KRR1
CC	GO:0042581	specific granule	121	-0.50179	-1.2709	0.0876565	0.617275	0.595623	995	tags=15%, list=8%, signal=14%	CD53/KCNAB2/CD93/ADAM8/CTSD/PTPRB/CYBA/PLAUR/B2M/OLFM4/SNAP25/ADGRG3/PLAU/ITGB2/CFP/LYZ/TNFRSF1B/CLEC4D
BP	GO:0030041	actin filament polymerization	138	-0.487468	-1.25768	0.0877514	0.617275	0.595623	1402	tags=16%, list=11%, signal=14%	TMOD3/ACTR2/CATIP/ICAM1/ARHGAP28/GSN/GMFG/TWF1/DMTN/CTTN/ARPC1B/PSTPIP1/ADD2/DIAPH3/WAS/PREX1/CYFIP2/NCKAP1L/AIF1/PSTPIP2/TMOD4/CCR7
BP	GO:0035970	peptidyl-threonine dephosphorylation	21	0.72365	1.40929	0.0879346	0.617275	0.595623	988	tags=14%, list=8%, signal=13%	DUSP4/PPM1D/DUSP7
BP	GO:1900273	positive regulation of long-term synaptic potentiation	21	0.724702	1.41134	0.0879346	0.617275	0.595623	5	tags=5%, list=0%, signal=5%	INS
BP	GO:0008608	attachment of spindle microtubules to kinetochore	28	-0.672736	-1.37979	0.088	0.617275	0.595623	2099	tags=39%, list=17%, signal=33%	EML4/NDC80/CDT1/SIRT2/BUB3/KIF2C/RB1/NUF2/AURKB/NEK2/CCNB1
BP	GO:0070231	T cell apoptotic process	32	-0.648653	-1.35187	0.0880626	0.617275	0.595623	1549	tags=28%, list=12%, signal=25%	TSC22D3/PRKCQ/CD27/ADAM8/WNT5A/SLC46A2/ADA/FASLG/CD274
BP	GO:0050435	amyloid-beta metabolic process	45	-0.614647	-1.35522	0.0882353	0.617898	0.596225	406	tags=11%, list=3%, signal=11%	RTN3/PSEN2/NTRK2/CLU/APOE
BP	GO:0000463	maturation of LSU-rRNA from tricistronic rRNA transcript (SSU-rRNA, 5.8S rRNA, LSU-rRNA)	15	0.745398	1.40881	0.0883534	0.618139	0.596457	1051	tags=20%, list=8%, signal=18%	RPL35/GTPBP4/RPL7
BP	GO:0007568	aging	235	-0.452659	-1.23633	0.0884477	0.618212	0.596528	1979	tags=22%, list=16%, signal=19%	DCN/TP63/CNR1/HTRA2/MAPKAPK5/NEK6/SOD1/EDN1/GBA/FBXO5/EPO/NFE2L2/AMH/BRCA2/RPS6KB1/ATG7/MIF/SRR/BCL6/RAD54L/KRAS/ICAM1/DKK1/FOXM1/GSN/SMC5/P2RY1/TGFB3/SREBF1/ING2/FBXO4/CRYAB/B2M/TERT/AURKB/HLA-G/CTSC/PRELP/ATP2B1/CYP1A1/PAX5/ADA/EEF2/ITGB2/CALCA/C1QA/INPP5D/ASS1/SPI1/MAP2K1/TNFRSF1B/HAMP
BP	GO:0070588	calcium ion transmembrane transport	228	-0.451972	-1.2289	0.0886076	0.618659	0.596959	1435	tags=17%, list=11%, signal=15%	RGS9/SLC24A2/PSEN2/P2RY12/STIM1/ANK2/JPH3/JPH1/SLC8A2/FKBP1B/GPM6A/CACNA1S/MICU1/SLC9A1/MICU2/SNCA/DRD2/CALHM1/ATP2C1/XCR1/GRIN1/P2RY6/ATP2B1/CHRNA9/PKD1/SLC24A4/CXCL10/PTPRC/ANXA2/ADRA2A/TMEM38A/TLR9/FASLG/DMD/CACNA2D3/CCR7/CCL3/GRIN2C
BP	GO:0035136	forelimb morphogenesis	30	0.665429	1.411	0.0887097	0.618659	0.596959	788	tags=10%, list=6%, signal=9%	WNT7A/CACNA1C/FMN1
BP	GO:0060192	negative regulation of lipase activity	10	0.789121	1.39204	0.0887949	0.618659	0.596959	50	tags=20%, list=0%, signal=20%	ANGPTL4/RGS2
BP	GO:0006307	DNA dealkylation involved in DNA repair	10	-0.785116	-1.38174	0.0888469	0.618659	0.596959	586	tags=40%, list=5%, signal=38%	ALKBH3/ALKBH2/MGMT/FTO
BP	GO:1990928	response to amino acid starvation	41	0.627662	1.38654	0.0895522	0.622819	0.600973	935	tags=20%, list=7%, signal=18%	ATF3/MIOS/GCN1/SZT2/EIF2AK3/SEH1L/EIF2A/EIF2S1
BP	GO:0032924	activin receptor signaling pathway	32	0.652337	1.39907	0.089613	0.622819	0.600973	1050	tags=25%, list=8%, signal=23%	FST/TGFBR1/ACVR2A/MAGI2/TGIF2/INHBB/NOMO1/GDF6
BP	GO:0097178	ruffle assembly	39	-0.631287	-1.35672	0.0900563	0.623606	0.601732	1596	tags=23%, list=13%, signal=20%	RHOG/PFN2/EPS8L3/CYFIP1/P2RY12/ICAM1/CORO1C/SH3BP1/AIF1
BP	GO:0071318	cellular response to ATP	16	-0.724093	-1.36096	0.0901804	0.623606	0.601732	2112	tags=44%, list=17%, signal=37%	SSH1/TRPV1/SOD1/P2RY12/CIB2/P2RY1/P2RY11
BP	GO:1904375	regulation of protein localization to cell periphery	106	0.544919	1.35731	0.0902935	0.623606	0.601732	1405	tags=15%, list=11%, signal=14%	INS/ACTB/SAPCD2/CSRP3/CLIP3/PRKCH/DAB2/MRAP2/GPSM2/ZDHHC2/ATP2B4/SPTBN1/IQSEC2/PLS1/CLTC/LDLRAP1
BP	GO:0006541	glutamine metabolic process	17	0.740303	1.41557	0.0903614	0.623606	0.601732	873	tags=18%, list=7%, signal=16%	GLUL/PFAS/CPS1
BP	GO:0007266	Rho protein signal transduction	107	-0.512421	-1.28164	0.0904255	0.623606	0.601732	2034	tags=22%, list=16%, signal=19%	RHOA/CUL3/APOA1/RHOG/STMN1/RASGRF2/RHOB/EPS8L3/SHTN1/ARHGEF3/RTN4R/BCL6/ARHGEF2/F2RL2/GPR174/ROBO1/CDH13/PDPN/P2RY8/NET1/WAS/ADRA2A/APOE/GPR18
BP	GO:0003214	cardiac left ventricle morphogenesis	13	0.766078	1.42051	0.0907258	0.623606	0.601732	2380	tags=46%, list=19%, signal=38%	RYR2/NOTCH1/NPY2R/HAND1/GSK3A/RBPJ
BP	GO:0006654	phosphatidic acid biosynthetic process	36	-0.637772	-1.34827	0.0907336	0.623606	0.601732	715	tags=17%, list=6%, signal=16%	AGPAT5/PLD6/PLA2G1B/PLA2G12A/GPAT3/AGPAT4
BP	GO:0001767	establishment of lymphocyte polarity	10	-0.783944	-1.37968	0.0907372	0.623606	0.601732	1515	tags=40%, list=12%, signal=35%	DOCK2/GSN/CRTAM/CCR7
BP	GO:0002638	negative regulation of immunoglobulin production	10	-0.784772	-1.38113	0.0907372	0.623606	0.601732	1793	tags=60%, list=14%, signal=52%	NDFIP1/CD22/BCL6/TMBIM6/PARP3/FCRL3
BP	GO:0031442	positive regulation of mRNA 3'-end processing	10	-0.783848	-1.37951	0.0907372	0.623606	0.601732	117	tags=40%, list=1%, signal=40%	PAF1/NUDT21/CPEB1/CCNB1
BP	GO:0070669	response to interleukin-2	10	-0.784836	-1.38125	0.0907372	0.623606	0.601732	1194	tags=40%, list=9%, signal=36%	CITED1/IL2RG/IL2RB/SYK
MF	GO:0003682	chromatin binding	434	0.446067	1.25507	0.0909091	0.623606	0.601732	2347	tags=22%, list=18%, signal=18%	ELK1/PDX1/GRHL1/SAMD11/RBPJL/ISL1/PLAC8/TRIM28/GLI1/CRTC2/ACTB/NEUROD1/SIRT7/APBB1/HDAC4/CCNT1/PRDM11/TNRC18/ASXL1/PPARGC1A/NCOA2/PTF1A/NCOA1/CREBBP/ONECUT1/NAP1L1/SPHK2/CHD4/INSM1/SFMBT2/RBL2/FUS/ATOH1/NFIA/PRDM15/NOTCH1/MEIS1/EP400/UPF1/ASH1L/FABP1/CHD7/SCML2/DDX1/PWWP2A/DHX9/PRDM1/MYOD1/SUPT6H/RERE/BAHCC1/DMRT1/HSF1/SMARCC2/CHD8/ARX/RAD21L1/NSD1/EGFR/SBNO1/MCM3AP/LEF1/NKX2-5/NFKB1/SRF/PER1/EBF…
BP	GO:0046578	regulation of Ras protein signal transduction	163	-0.479042	-1.25661	0.0909091	0.623606	0.601732	1347	tags=14%, list=11%, signal=13%	DAB2IP/ARHGEF3/RTN4R/BCL6/KRAS/IQSEC3/FOXM1/ARHGEF2/CADM4/F2RL2/GPR174/ROBO1/RASGRP1/VAV1/P2RY8/CYTH4/NET1/PSD3/SH3BP1/CSF1/EPOR/APOE/GPR18
MF	GO:0048019	receptor antagonist activity	10	0.788267	1.39054	0.0909091	0.623606	0.601732	52	tags=10%, list=0%, signal=10%	FST
BP	GO:0001504	neurotransmitter uptake	33	-0.644206	-1.34734	0.0910853	0.624234	0.602339	1136	tags=36%, list=9%, signal=33%	SLC1A6/PER2/SNCA/DRD2/SLC29A2/TOR1A/SNAP25/SLC18A1/GDNF/ITGB3/SLC29A1/SLC18A2
CC	GO:0000778	condensed nuclear chromosome kinetochore	15	-0.734241	-1.36868	0.0912698	0.624919	0.602999	2504	tags=53%, list=20%, signal=43%	BUB1/DSN1/NDC80/PLK1/CENPK/CENPT/NUF2/CCNB1
BP	GO:1990822	basic amino acid transmembrane transport	12	0.775955	1.40735	0.0914761	0.625264	0.603332	767	tags=33%, list=6%, signal=31%	SLC22A2/SLC7A1/SLC7A3/SLC47A1
BP	GO:0002819	regulation of adaptive immune response	103	-0.512363	-1.27439	0.0915619	0.625264	0.603332	1407	tags=27%, list=11%, signal=24%	FUT7/PRKCQ/BCL6/LTA/PARP3/MR1/MLH1/LOXL3/SAMSN1/SMAD7/C4BPA/HLA-A/TFRC/CD48/HAVCR2/B2M/IL1RL1/TRAF2/HLA-G/SKAP1/PTPRC/IRF1/WAS/ADA/TNFSF13B/SASH3/CD274/TNFRSF1B
BP	GO:0032892	positive regulation of organic acid transport	28	0.674877	1.41489	0.0916335	0.625264	0.603332	1410	tags=21%, list=11%, signal=19%	ACSL5/SLC12A2/SLC38A3/PLA2R1/PLA2G4A/ACSL1
BP	GO:1900180	regulation of protein localization to nucleus	115	0.525235	1.32155	0.0917226	0.625264	0.603332	1699	tags=16%, list=13%, signal=14%	INS/GLUL/TRIM28/EIF2AK3/IPO5/LATS2/HSP90AB1/CCT2/SRC/APOD/CCT8/LZTS2/SMO/PKIA/TCP1/FYN/OTUD7B/CCT3
BP	GO:0030261	chromosome condensation	25	-0.684471	-1.36984	0.092	0.625264	0.603332	1634	tags=36%, list=13%, signal=31%	NCAPG2/BANF1/DFFB/NCAPD2/SMC5/MCPH1/NCAPD3/NUSAP1/CCNB1
BP	GO:0043368	positive T cell selection	25	-0.682841	-1.36658	0.092	0.625264	0.603332	494	tags=28%, list=4%, signal=27%	LOXL3/SLAMF6/LY9/ZAP70/PTPRC/CD3E/CD3D
BP	GO:0043372	positive regulation of CD4-positive, alpha-beta T cell differentiation	14	-0.741324	-1.35694	0.0923379	0.625264	0.603332	461	tags=29%, list=4%, signal=28%	PRKCZ/MYB/SASH3/NCKAP1L
BP	GO:0010042	response to manganese ion	17	0.739293	1.41364	0.0923695	0.625264	0.603332	935	tags=29%, list=7%, signal=27%	TH/EIF2AK3/LRRK2/ADAM9/EIF2S1
BP	GO:0086014	atrial cardiac muscle cell action potential	15	0.74292	1.40413	0.0923695	0.625264	0.603332	1358	tags=27%, list=11%, signal=24%	CACNA1C/RYR2/KCNQ1/SCN3B
BP	GO:0086026	atrial cardiac muscle cell to AV node cell signaling	15	0.74292	1.40413	0.0923695	0.625264	0.603332	1358	tags=27%, list=11%, signal=24%	CACNA1C/RYR2/KCNQ1/SCN3B
BP	GO:0086066	atrial cardiac muscle cell to AV node cell communication	15	0.74292	1.40413	0.0923695	0.625264	0.603332	1358	tags=27%, list=11%, signal=24%	CACNA1C/RYR2/KCNQ1/SCN3B
BP	GO:0033627	cell adhesion mediated by integrin	62	-0.582023	-1.35585	0.0923913	0.625264	0.603332	1344	tags=26%, list=11%, signal=23%	P2RY12/VTN/ICAM1/ACER2/SNAI2/NPNT/SWAP70/SKAP1/PLAU/LPXN/ADA/SYK/ITGB2/NCKAP1L/ITGB3/CD3E
BP	GO:2000242	negative regulation of reproductive process	44	-0.617043	-1.35334	0.0924214	0.625264	0.603332	898	tags=14%, list=7%, signal=13%	NPR2/PRDX4/WNT5A/HYAL3/ADA/NANOS2
BP	GO:0006490	oligosaccharide-lipid intermediate biosynthetic process	19	-0.714917	-1.39706	0.0925197	0.625355	0.60342	2053	tags=26%, list=16%, signal=22%	SRD5A3/ALG2/ALG8/DHDDS/RFT1
BP	GO:0002791	regulation of peptide secretion	240	0.492782	1.34221	0.0931264	0.627006	0.605013	1140	tags=12%, list=9%, signal=11%	GCG/INS/CFTR/PDX1/CACNA1C/P3H1/ISL1/RFX6/DISP1/NEUROD1/SLC16A1/SLC12A2/APBB1/IL12B/STXBP5L/NR0B2/KCNC2/PASK/SSTR5/TGFB2/NR1D1/ADAM9/FAM3D/INHBB/CPT1A/HIF1A/ANO1/CHD7/NPY2R
MF	GO:0015245	fatty acid transmembrane transporter activity	17	-0.716949	-1.37377	0.093254	0.627006	0.605013	1551	tags=24%, list=12%, signal=21%	SLC27A2/SLC1A1/SLC1A6/SLC17A7
MF	GO:0003727	single-stranded RNA binding	69	0.556949	1.32031	0.0932755	0.627006	0.605013	1363	tags=14%, list=11%, signal=13%	PABPC4/RBMS2/AGO4/RPS7/PABPC1/DDX1/ZFR/DHX9/KHDRBS1/DHX58
BP	GO:0090329	regulation of DNA-dependent DNA replication	43	-0.621235	-1.3568	0.0934579	0.627006	0.605013	2245	tags=40%, list=18%, signal=33%	RFC2/TIMELESS/DBF4B/CDT1/PCNA/RFC3/FBXO5/RFC5/KAT7/BRCA2/ATG7/TIPIN/BCL6/E2F8/E2F7/DONSON/WRNIP1
BP	GO:2000401	regulation of lymphocyte migration	40	-0.628315	-1.3558	0.093633	0.627006	0.605013	1461	tags=25%, list=11%, signal=22%	ECM1/MSN/CD200R1/ADAM8/CD200/WNT5A/ADTRP/CXCL10/AIF1/CCL3
BP	GO:1900182	positive regulation of protein localization to nucleus	77	0.567272	1.36859	0.0936819	0.627006	0.605013	908	tags=9%, list=7%, signal=8%	INS/TRIM28/EIF2AK3/IPO5/HSP90AB1/CCT2/SRC
BP	GO:0051651	maintenance of location in cell	151	-0.480913	-1.25569	0.0936937	0.627006	0.605013	1303	tags=14%, list=10%, signal=13%	ANK2/JPH3/JPH1/GAA/GSN/FKBP1B/SNCA/TWF1/DRD2/XCR1/P2RY6/TXN/SLC30A4/CXCL10/PTPRC/TMEM38A/FASLG/DMD/CCR7/CCL3/APOE
BP	GO:0071216	cellular response to biotic stimulus	140	-0.48545	-1.25837	0.0936937	0.627006	0.605013	1248	tags=15%, list=10%, signal=14%	CXCL8/ICAM1/CXCL2/SIRPA/CD55/XBP1/TIRAP/HAVCR2/WNT5A/TLR1/IL36G/CD6/CXCL10/SIGIRR/SYK/ASS1/CD274/IRF8/CCL3/TNFRSF1B/HAMP
MF	GO:0008135	translation factor activity, RNA binding	71	0.548756	1.31038	0.0938166	0.627006	0.605013	1483	tags=24%, list=12%, signal=21%	EIF3H/GCN1/EIF3C/EEF1B2/EIF3B/EIF3A/EIF2S3/TUFM/EEF1G/EIF2A/EIF2S1/EEF1D/CPEB4/EIF4A1/EIF3M/EIF4G1/MTIF2
BP	GO:0046473	phosphatidic acid metabolic process	38	-0.634728	-1.35406	0.0938697	0.627006	0.605013	715	tags=13%, list=6%, signal=12%	PLD6/PLA2G1B/PLA2G12A/GPAT3/AGPAT4
BP	GO:0060411	cardiac septum morphogenesis	57	0.59456	1.35886	0.0940367	0.627006	0.605013	1439	tags=30%, list=11%, signal=27%	LRP2/TGFBR1/ISL1/SLIT2/FGFR2/TBX2/WNT11/SEMA3C/TGFB2/NOTCH1/PROX1/NOTCH2/ZFPM1/CHD7/SLIT3/HAND1/SMO
CC	GO:0035578	azurophil granule lumen	67	-0.561465	-1.3172	0.0940959	0.627006	0.605013	2177	tags=31%, list=17%, signal=26%	DSN1/GM2A/CTSA/GNS/C3/FRK/VAT1/ARSA/NPC2/CYB5R3/ARSB/ACTR2/HEXB/GRN/CTSC/RNASET2/AGA/GLB1/PRDX6/ANXA2/LYZ
BP	GO:1900739	regulation of protein insertion into mitochondrial membrane involved in apoptotic signaling pathway	16	-0.721431	-1.35596	0.0941884	0.627006	0.605013	2648	tags=50%, list=21%, signal=40%	TP73/TFDP1/PPP3CC/YWHAB/TP63/E2F1/PPP3R1/NMT1
BP	GO:1900740	positive regulation of protein insertion into mitochondrial membrane involved in apoptotic signaling pathway	16	-0.721431	-1.35596	0.0941884	0.627006	0.605013	2648	tags=50%, list=21%, signal=40%	TP73/TFDP1/PPP3CC/YWHAB/TP63/E2F1/PPP3R1/NMT1
BP	GO:0043116	negative regulation of vascular permeability	15	0.739593	1.39784	0.0943775	0.627006	0.605013	866	tags=33%, list=7%, signal=31%	DDAH1/SLIT2/PTPRJ/PDE3A/PDE2A
BP	GO:0005977	glycogen metabolic process	61	0.582705	1.35326	0.094382	0.627006	0.605013	1200	tags=13%, list=9%, signal=12%	INS/STK40/PHKA2/PASK/NR1D1/PRKAG2/INSR/DYRK2
BP	GO:1903035	negative regulation of response to wounding	73	-0.554543	-1.32345	0.0944444	0.627006	0.605013	1318	tags=21%, list=10%, signal=19%	RTN4R/VTN/THBS1/PROC/CERS2/CPB2/TSPAN8/PLAUR/GP1BA/ADTRP/PTPRS/PLAU/SERPING1/APOE/F11
BP	GO:0033045	regulation of sister chromatid segregation	66	-0.561865	-1.32358	0.0945455	0.627006	0.605013	2717	tags=39%, list=21%, signal=31%	MOS/LCMT1/PCID2/BUB1/KNTC1/CDC27/MAD2L1/RMI2/NDC80/CDT1/CUL3/NEK6/DYNC1LI1/FBXO5/PLK1/BUB3/DLGAP5/CDC6/UBE2C/NUMA1/RB1/AURKB/CDC20/MAD2L1BP/GEN1/CCNB1
BP	GO:0045880	positive regulation of smoothened signaling pathway	29	0.662364	1.39602	0.0945674	0.627006	0.605013	861	tags=17%, list=7%, signal=16%	DYNC2H1/GLI1/EVC/TTC23/DLG5
CC	GO:0005882	intermediate filament	56	0.596081	1.36771	0.0945946	0.627006	0.605013	848	tags=16%, list=7%, signal=15%	DSP/NEFM/CLDN11/DES/PRPH/CLIP1/EVPL/LMNA/MNS1
BP	GO:0071219	cellular response to molecule of bacterial origin	121	-0.498577	-1.26276	0.0948122	0.627006	0.605013	1248	tags=17%, list=10%, signal=15%	CXCL8/ICAM1/CXCL2/SIRPA/CD55/XBP1/TIRAP/HAVCR2/WNT5A/TLR1/IL36G/CD6/CXCL10/SIGIRR/ASS1/CD274/IRF8/CCL3/TNFRSF1B/HAMP
BP	GO:0002922	positive regulation of humoral immune response	13	-0.759349	-1.37805	0.0948617	0.627006	0.605013	1195	tags=54%, list=9%, signal=49%	HPX/TNF/C3/LTA/IL17F/PTPRC/CCR7
BP	GO:0048730	epidermis morphogenesis	24	0.694082	1.41763	0.0948617	0.627006	0.605013	1486	tags=33%, list=12%, signal=29%	FST/FGFR2/TGFB2/NOTCH1/FGF7/FOXQ1/SMO/KRT27
BP	GO:0009948	anterior/posterior axis specification	36	0.633695	1.38381	0.0950413	0.627006	0.605013	661	tags=14%, list=5%, signal=13%	FZD5/PGAP1/CDX4/LRP6/DDIT3
BP	GO:0044784	metaphase/anaphase transition of cell cycle	61	-0.576699	-1.34231	0.0951526	0.627006	0.605013	2717	tags=39%, list=21%, signal=31%	MOS/LCMT1/PCID2/BUB1/KNTC1/CDC27/MAD2L1/NDC80/CDT1/CUL3/NEK6/DYNC1LI1/FBXO5/PLK1/BUB3/DLGAP5/CDC6/UBE2C/RB1/AURKB/CDC20/MAD2L1BP/GEN1/CCNB1
BP	GO:0009952	anterior/posterior pattern specification	158	0.496838	1.29472	0.0953437	0.627006	0.605013	1804	tags=19%, list=14%, signal=16%	FZD5/PGAP1/TGFBR1/CDX4/LRP6/ACVR2A/NEUROD1/ROR2/NKD1/HELT/DDIT3/AXIN2/SEMA3C/CDON/NOTCH1/LFNG/HES2/NR2F2/PBX3/SMO/FUZ/HOXB5/HES6/HOXA10/TDRD5/BPTF/LEF1/LRP5/SRF/DMRT2
BP	GO:0045732	positive regulation of protein catabolic process	183	-0.461297	-1.22478	0.0954128	0.627006	0.605013	922	tags=21%, list=7%, signal=20%	NDFIP1/GBA/NFE2L2/RAB7A/SIRT2/PLK1/CSNK1A1/BBS7/ATG7/MSN/DAB2IP/PTTG1IP/BCAP31/SMAD7/C4BPA/ADAM8/CEBPA/CCDC22/PRICKLE1/ATXN3/FBXW8/WNT5A/MYLIP/VPS35/AURKA/RNF19B/DET1/CTSC/CDC20/NSF/VPS11/RNF14/NEDD4L/CLU/ADRA2A/TNFSF12/APOE/TNFRSF1B/HAMP
BP	GO:0006073	cellular glucan metabolic process	62	0.582641	1.35706	0.0955556	0.627006	0.605013	1200	tags=13%, list=9%, signal=12%	INS/STK40/PHKA2/PASK/NR1D1/PRKAG2/INSR/DYRK2
BP	GO:0044042	glucan metabolic process	62	0.582641	1.35706	0.0955556	0.627006	0.605013	1200	tags=13%, list=9%, signal=12%	INS/STK40/PHKA2/PASK/NR1D1/PRKAG2/INSR/DYRK2
BP	GO:0000578	embryonic axis specification	25	0.688355	1.41582	0.0956175	0.627006	0.605013	603	tags=16%, list=5%, signal=15%	FZD5/WNT7A/STIL/C2CD3
BP	GO:0005979	regulation of glycogen biosynthetic process	25	0.69193	1.42318	0.0956175	0.627006	0.605013	5	tags=4%, list=0%, signal=4%	INS
BP	GO:0010962	regulation of glucan biosynthetic process	25	0.69193	1.42318	0.0956175	0.627006	0.605013	5	tags=4%, list=0%, signal=4%	INS
BP	GO:0060914	heart formation	25	0.69211	1.42354	0.0956175	0.627006	0.605013	860	tags=24%, list=7%, signal=22%	LRP2/HAND2/ISL1/WNT11/AXIN2/NOTCH1
BP	GO:0097194	execution phase of apoptosis	67	0.560861	1.32651	0.0956522	0.627006	0.605013	483	tags=6%, list=4%, signal=6%	GCG/FAP/PTGIS/DNASE2B
BP	GO:0033138	positive regulation of peptidyl-serine phosphorylation	74	0.559906	1.33799	0.0958606	0.627814	0.605793	905	tags=9%, list=7%, signal=9%	GCG/CAPRIN2/HSP90AB1/BCAR3/RPTOR/TENM1/CD44
BP	GO:0009855	determination of bilateral symmetry	105	0.54015	1.34587	0.0959821	0.627831	0.605809	1502	tags=22%, list=12%, signal=19%	TBC1D32/DYNC2H1/HAND2/STIL/FOXJ1/ACVR2A/RTTN/TBX2/MEGF8/C2CD3/VANGL2/DDIT3/MMP21/NOTCH1/DNAI1/HIF1A/NOTCH2/HAND1/GREM1/KIF3B/DNAH5/SMO/TBX22
BP	GO:0002761	regulation of myeloid leukocyte differentiation	82	-0.546079	-1.31423	0.0961183	0.627831	0.605809	1793	tags=24%, list=14%, signal=21%	NDFIP1/TESC/CUL4A/ATP6AP1/MITF/GPR68/INHBA/TLR3/TAL1/MAFB/GATA2/RB1/ZBTB46/CCR1/CA2/INPP5D/CSF1/C1QC/CCL3/RUNX1
BP	GO:0032436	positive regulation of proteasomal ubiquitin-dependent protein catabolic process	69	-0.551798	-1.29808	0.0961183	0.627831	0.605809	1771	tags=25%, list=14%, signal=21%	GBA/NFE2L2/SIRT2/PLK1/CSNK1A1/BBS7/BCAP31/SMAD7/CEBPA/PRICKLE1/FBXW8/AURKA/RNF19B/DET1/CDC20/RNF14/CLU
BP	GO:0009162	deoxyribonucleoside monophosphate metabolic process	14	-0.738356	-1.35151	0.0962672	0.628248	0.606211	259	tags=43%, list=2%, signal=42%	DCTD/UPP1/DCK/XDH/TK1/ADA
MF	GO:0017166	vinculin binding	11	-0.773409	-1.39085	0.0965909	0.629008	0.606945	129	tags=27%, list=1%, signal=27%	SYNM/CORO2B/DMD
MF	GO:0016645	oxidoreductase activity, acting on the CH-NH group of donors	24	-0.680433	-1.35731	0.0967742	0.629008	0.606945	1711	tags=42%, list=13%, signal=36%	MTHFD1/PIPOX/ALDH4A1/DMGDH/ALDH1L2/PRODH2/QDPR/MTHFD1L/PRODH/IL4I1
BP	GO:0036297	interstrand cross-link repair	49	-0.59508	-1.34498	0.0967742	0.629008	0.606945	1056	tags=10%, list=8%, signal=9%	FANCF/FANCD2/FANCC/RAD51AP1/DCLRE1A
BP	GO:0051223	regulation of protein transport	438	0.444494	1.24664	0.0967742	0.629008	0.606945	1053	tags=10%, list=8%, signal=10%	GCG/INS/PDZK1/FZD5/CFTR/PDX1/CACNA1C/P3H1/GDI1/XPO4/ISL1/RFX6/DISP1/TRIM28/NEUROD1/SIRT7/PTPN14/SLC16A1/SLC12A2/APBB1/IL12B/IPO5/STXBP5L/NR0B2/PCM1/LRRK2/ANK3/KCNC2/HSP90AB1/SSTR5/TENM1/TGFB2/SRC/NR1D1/HSPA8/ADAM9/FAM3D/INHBB/CPT1A/SEC16A/SEC16B/APOD/HIF1A/ANO1
BP	GO:0003148	outflow tract septum morphogenesis	24	0.688283	1.40579	0.0968379	0.629008	0.606945	831	tags=25%, list=7%, signal=23%	LRP2/ISL1/FGFR2/TBX2/SEMA3C/TGFB2
BP	GO:0018027	peptidyl-lysine dimethylation	18	0.729269	1.40017	0.0969697	0.629008	0.606945	1930	tags=39%, list=15%, signal=33%	SETD1A/KMT2A/PRDM9/ASH1L/EHMT1/SETD2/KMT2B
BP	GO:0032042	mitochondrial DNA metabolic process	11	0.780624	1.39147	0.0970464	0.629008	0.606945	886	tags=18%, list=7%, signal=17%	PPARGC1A/MPV17
BP	GO:0009799	specification of symmetry	106	0.537008	1.33761	0.0970655	0.629008	0.606945	1502	tags=22%, list=12%, signal=19%	TBC1D32/DYNC2H1/HAND2/STIL/FOXJ1/ACVR2A/RTTN/TBX2/MEGF8/C2CD3/VANGL2/DDIT3/MMP21/NOTCH1/DNAI1/HIF1A/NOTCH2/HAND1/GREM1/KIF3B/DNAH5/SMO/TBX22
BP	GO:0034501	protein localization to kinetochore	17	-0.715018	-1.37007	0.0972222	0.62911	0.607043	2002	tags=47%, list=16%, signal=40%	NDC80/CDT1/CDK1/BUB3/CENPQ/CENPT/ZWILCH/AURKB
BP	GO:0033235	positive regulation of protein sumoylation	10	0.779355	1.37481	0.0972516	0.62911	0.607043	1473	tags=20%, list=12%, signal=18%	HDAC4/RASD2
BP	GO:0060074	synapse maturation	21	-0.696246	-1.37818	0.0974659	0.629177	0.607108	1602	tags=43%, list=13%, signal=38%	PALM/DAB2IP/NRXN1/CAMK2B/NEFL/CDC20/CLSTN1/NEUROD2/IGSF21
BP	GO:0000724	double-strand break repair via homologous recombination	114	-0.504108	-1.26345	0.0974729	0.629177	0.607108	2007	tags=21%, list=16%, signal=18%	RMI2/PPP4C/SAMHD1/MCM6/MCM5/RBBP8/RAD51/MCM3/GINS4/BRCA2/AUNIP/MCM2/ACTR2/ZFYVE26/RAD54L/POLQ/MCM4/SMC5/DMC1/ZSWIM7/WAS/RAD51AP1/GEN1/SWI5
BP	GO:0002440	production of molecular mediator of immune response	125	-0.492627	-1.25526	0.0975177	0.629177	0.607108	1278	tags=23%, list=10%, signal=21%	BCL6/TLR3/TMBIM6/POLQ/PARP3/TMIGD2/UNG/MLH1/SLC7A5/FCRL3/CD55/SMAD7/TGFB3/TRIL/HLA-A/XBP1/SEMA7A/TFRC/WNT5A/B2M/TRAF2/HLA-G/IL17F/SWAP70/PTPRC/TLR9/SASH3/CLNK/TNFRSF1B
MF	GO:0031543	peptidyl-proline dioxygenase activity	12	0.771828	1.39987	0.0977131	0.629887	0.607793	1280	tags=42%, list=10%, signal=38%	P3H1/P4HA3/P4HB/P3H2/P4HTM
BP	GO:0019217	regulation of fatty acid metabolic process	71	0.545045	1.30152	0.098081	0.62997	0.607873	1082	tags=18%, list=9%, signal=17%	INS/ACACB/PDK1/SCAP/ABCD2/PPARGC1A/LPGAT1/ADIPOR2/NCOR1/NR4A3/CPT1A/PRKAG2/FABP1
MF	GO:0004114	3',5'-cyclic-nucleotide phosphodiesterase activity	21	0.720576	1.4033	0.0981595	0.62997	0.607873	1452	tags=48%, list=11%, signal=42%	PDE8B/PDE9A/PDE7B/PDE3A/PDE6C/PDE6H/PDE2A/PDE6A/PDE4A/PDE11A
BP	GO:0071166	ribonucleoprotein complex localization	114	0.511947	1.28536	0.0982143	0.62997	0.607873	2267	tags=20%, list=18%, signal=17%	NUP210/YTHDC1/SMG7/SEH1L/RPS15/NUP205/UPF1/SMG1/DDX19B/SUPT6H/RBM15B/THOC2/MCM3AP/NUP214/RANBP2/SETD2/NUP153/FYTTD1/EIF6/FIP1L1/NXF1/TPR/NUP98
BP	GO:0001732	formation of cytoplasmic translation initiation complex	15	0.732624	1.38467	0.0983936	0.62997	0.607873	2923	tags=80%, list=23%, signal=62%	EIF3H/EIF3C/EIF3B/EIF3A/EIF3M/EIF3I/EIF3E/EIF3G/EIF3F/EIF3L/EIF3D/EIF3K
CC	GO:0005852	eukaryotic translation initiation factor 3 complex	15	0.734651	1.3885	0.0983936	0.62997	0.607873	2923	tags=80%, list=23%, signal=62%	EIF3H/EIF3C/EIF3B/EIF3A/EIF3M/EIF3I/EIF3E/EIF3G/EIF3F/EIF3L/EIF3D/EIF3K
CC	GO:0016282	eukaryotic 43S preinitiation complex	15	0.732638	1.3847	0.0983936	0.62997	0.607873	2923	tags=80%, list=23%, signal=62%	EIF3H/EIF3C/EIF3B/EIF3A/EIF3M/EIF3I/EIF3E/EIF3G/EIF3F/EIF3L/EIF3D/EIF3K
MF	GO:0140297	DNA-binding transcription factor binding	326	0.462889	1.2702	0.0985577	0.62997	0.607873	1934	tags=21%, list=15%, signal=18%	ELK1/ZNF516/HAND2/ISL1/NR4A1/CRTC2/ACTB/NEUROD1/MAP3K10/HDAC4/ZNF503/NR0B2/ASXL1/PPARGC1A/NCOA2/HSPB1/PPARGC1B/NCOA1/CREBBP/DDIT3/CTDP1/NRIP1/CHD4/SIK1/FOXP2/RBL2/CREB1/MMS19/NCOR1/PROX1/SRC/NR4A3/MYC/HIF1A/NOTCH2/NCOA3/NR1I2/ZFPM1/ZBTB7A/BRD8/PHB2/PTPRT/DHX9/HAND1/CRTC3/MEF2D/MYOD1/RERE/HSF1/TLE3/PRDM5/NSD1/ANKRD1/HES6/PTPN2/LEF1/KLF5/SRF/ARNT2/ARNTL/GRIP1/SPEN/TACC2/CALR/MIXL1/KLF4/PITX1
BP	GO:0032728	positive regulation of interferon-beta production	26	-0.676551	-1.35521	0.0985626	0.62997	0.607873	1228	tags=19%, list=10%, signal=17%	TLR3/TBK1/TLR7/IRF1/TLR9
BP	GO:0006109	regulation of carbohydrate metabolic process	169	0.491488	1.28951	0.0986842	0.62997	0.607873	1200	tags=14%, list=9%, signal=13%	GCG/INS/NUP210/FAM3C/SIRT7/ACACB/PDK1/HDAC4/SEH1L/PPARGC1A/NCOA2/NUP205/PASK/SIK1/NKX1-1/NCOR1/SRC/SOGA1/HIF1A/PRKAG2/INSR/PGAM1/ZBTB7A/DYRK2
BP	GO:1903312	negative regulation of mRNA metabolic process	70	0.550101	1.31023	0.0987124	0.62997	0.607873	1013	tags=11%, list=8%, signal=11%	IGF2BP1/NBAS/CCNT1/RBM24/AXIN2/FUS/PABPC1/PKP3
BP	GO:0042407	cristae formation	13	0.758266	1.40602	0.0987903	0.62997	0.607873	1214	tags=15%, list=10%, signal=14%	ADCK1/CHCHD6
BP	GO:0010919	regulation of inositol phosphate biosynthetic process	13	-0.750612	-1.3622	0.0988142	0.62997	0.607873	883	tags=38%, list=7%, signal=36%	NTSR1/SNCA/P2RY1/PLEK/P2RY6
CC	GO:0005793	endoplasmic reticulum-Golgi intermediate compartment	116	0.515061	1.29757	0.0988764	0.62997	0.607873	745	tags=5%, list=6%, signal=5%	INS/AREG/UGGT2/GOLGB1/P4HB/DICER1
BP	GO:0055076	transition metal ion homeostasis	96	-0.520791	-1.2794	0.0989209	0.62997	0.607873	1959	tags=29%, list=15%, signal=25%	HPX/SLC40A1/ACO1/EPAS1/LTF/STEAP3/BDH2/SCARA5/SOD1/NDFIP1/SLC46A1/ATOX1/CYBRD1/COX19/TMPRSS6/ATP6AP1/SLC1A1/CCDC115/FLVCR1/CP/CCDC22/TFRC/B2M/SLC30A4/SLC31A2/ALAS2/HAMP/SLC30A1
BP	GO:0006405	RNA export from nucleus	120	0.521927	1.31331	0.0993228	0.630603	0.608484	2267	tags=21%, list=18%, signal=17%	NUP210/YTHDC1/SMG7/SEH1L/RPS15/NUP205/UPF1/SMG1/DHX9/KHDRBS1/DDX19B/SUPT6H/RBM15B/THOC2/MCM3AP/NUP214/RANBP2/SETD2/NUP153/FYTTD1/EIF6/FIP1L1/NXF1/TPR/NUP98
CC	GO:0033290	eukaryotic 48S preinitiation complex	14	0.75198	1.40711	0.0993915	0.630603	0.608484	2923	tags=93%, list=23%, signal=72%	EIF3H/EIF3C/EIF3B/EIF3A/EIF2S1/EIF3M/EIF3I/EIF3E/EIF3G/EIF3F/EIF3L/EIF3D/EIF3K
BP	GO:0032371	regulation of sterol transport	41	-0.620945	-1.34728	0.0994371	0.630603	0.608484	232	tags=20%, list=2%, signal=19%	CYP8B1/APOA1/EEPD1/SHH/PLTP/ANXA2/APOE/APOA4
BP	GO:0032374	regulation of cholesterol transport	41	-0.620945	-1.34728	0.0994371	0.630603	0.608484	232	tags=20%, list=2%, signal=19%	CYP8B1/APOA1/EEPD1/SHH/PLTP/ANXA2/APOE/APOA4
BP	GO:0090630	activation of GTPase activity	87	-0.527267	-1.27967	0.0994475	0.630603	0.608484	701	tags=10%, list=6%, signal=10%	ABR/WNT5A/RAP1GAP2/RASGRP1/CORO1C/ARHGAP22/TBCK/CCR7/ARHGAP25
BP	GO:0010677	negative regulation of cellular carbohydrate metabolic process	32	0.63943	1.37139	0.0997963	0.631114	0.608977	983	tags=25%, list=8%, signal=23%	INS/FAM3C/HDAC4/PPARGC1A/PASK/SIK1/NCOR1/SOGA1
BP	GO:0001912	positive regulation of leukocyte mediated cytotoxicity	28	-0.656068	-1.3456	0.1	0.631114	0.608977	1324	tags=39%, list=10%, signal=35%	LAMP1/MR1/CRTAM/HLA-A/SH2D1A/B2M/HLA-G/RASGRP1/SLAMF6/VAV1/PTPRC
BP	GO:0006493	protein O-linked glycosylation	71	0.54139	1.29279	0.100213	0.631114	0.608977	1077	tags=14%, list=8%, signal=13%	MUC13/MUC5AC/MUC3A/GALNT3/GALNT9/TMTC3/GALNT10/ST3GAL2/GALNT13/SDF2L1
MF	GO:0003724	RNA helicase activity	65	0.563409	1.32082	0.100223	0.631114	0.608977	1949	tags=28%, list=15%, signal=24%	MOV10L1/HELZ2/DDX46/DDX43/UPF1/DDX10/MOV10/DDX21/DDX28/EIF4A1/DDX1/DHX9/DHX58/DDX19B/TDRD9/DDX31/DDX27/DHX37
CC	GO:0031616	spindle pole centrosome	11	-0.771272	-1.38701	0.100379	0.631114	0.608977	2150	tags=64%, list=17%, signal=53%	NDE1/MISP/EMD/DLGAP5/NUMA1/AURKA/AURKB
BP	GO:0072524	pyridine-containing compound metabolic process	36	-0.628072	-1.32776	0.100386	0.631114	0.608977	2024	tags=25%, list=16%, signal=21%	AFMID/PARP10/QPRT/NMRK2/NMNAT1/ACMSD/NADK/IDO2/SARM1
BP	GO:0002224	toll-like receptor signaling pathway	117	-0.503403	-1.26431	0.100539	0.631114	0.608977	1228	tags=16%, list=10%, signal=15%	TLR3/TYRO3/FCRL3/TBK1/TRIL/TANK/TIRAP/CYBA/HAVCR2/TLR1/TLR7/CTSS/PTPRS/IRF1/ITGB2/TLR9/LGMN/CTSK/SARM1
BP	GO:0033194	response to hydroperoxide	13	-0.749628	-1.36041	0.100791	0.631114	0.608977	25	tags=23%, list=0%, signal=23%	CD38/GPX1/APOA4
BP	GO:0044788	modulation by host of viral process	24	-0.678779	-1.35401	0.100806	0.631114	0.608977	381	tags=17%, list=3%, signal=16%	CAV2/CRP/CSF1R/APOE
BP	GO:0010498	proteasomal protein catabolic process	403	-0.415261	-1.18618	0.10087	0.631114	0.608977	2014	tags=17%, list=16%, signal=14%	OS9/UCHL1/SGTB/CUL3/TAF9/CDK1/PSMA8/GBA/FBXO5/UBE2H/SHH/EDEM3/SPOPL/CUL4A/NFE2L2/SIRT2/PLK1/GID8/CSNK1A1/BBS7/BUB3/GPX1/RNF5/ANAPC16/DNAJB14/DAB2IP/AUP1/NUDT15/JKAMP/TMUB2/FBXL16/BCAP31/FBXL22/RNF103/CDK2/SPSB4/SMAD7/UBE2C/CEBPA/PSMB6/PRICKLE1/ATXN3/FBXO9/FBXW8/FBXO4/RBCK1/AURKA/RNF19B/AURKB/TRIM13/DET1/CDC20/FBXL15/TOR1A/PBK/RNF14/NEDD4L/PKD1/PSMB9/PSMB7/CLU/BAG5/MAEA/PSME2/PSMB8/CCNB1/APOE
BP	GO:0051985	negative regulation of chromosome segregation	40	-0.620851	-1.33969	0.101124	0.631114	0.608977	2717	tags=42%, list=21%, signal=34%	MOS/LCMT1/PCID2/BUB1/KNTC1/MAD2L1/NDC80/CDT1/DYNC1LI1/FBXO5/PLK1/BUB3/AURKB/CDC20/MAD2L1BP/GEN1/CCNB1
BP	GO:1905819	negative regulation of chromosome separation	40	-0.620851	-1.33969	0.101124	0.631114	0.608977	2717	tags=42%, list=21%, signal=34%	MOS/LCMT1/PCID2/BUB1/KNTC1/MAD2L1/NDC80/CDT1/DYNC1LI1/FBXO5/PLK1/BUB3/AURKB/CDC20/MAD2L1BP/GEN1/CCNB1
BP	GO:0030099	myeloid cell differentiation	303	-0.436189	-1.22156	0.101222	0.631114	0.608977	1114	tags=14%, list=9%, signal=13%	THBS1/FLVCR1/JAG1/JAGN1/TAL1/MAFB/NRROS/CEBPA/KLF1/GATA2/TIRAP/RB1/DMTN/TMEM14C/DNASE2/FASN/TFRC/SIGLEC15/MED1/B2M/PIK3CD/ZBTB46/CCR1/GP1BA/IKZF1/SLC4A1/CSF3R/MAEA/ANXA2/CA2/INPP5D/CSF1/NCKAP1L/C1QC/KLF13/SPI1/CCR7/IRF8/CCL3/CSF1R/RUNX1/ALAS2/PIR
MF	GO:0017017	MAP kinase tyrosine/serine/threonine phosphatase activity	11	0.776008	1.38324	0.101266	0.631114	0.608977	988	tags=18%, list=8%, signal=17%	DUSP4/DUSP7
BP	GO:0030322	stabilization of membrane potential	11	0.774679	1.38087	0.101266	0.631114	0.608977	1561	tags=36%, list=12%, signal=32%	KCNK16/KCNK2/KCNK3/KCNK1
BP	GO:0035331	negative regulation of hippo signaling	11	0.775091	1.3816	0.101266	0.631114	0.608977	2531	tags=64%, list=20%, signal=51%	WWC3/DLG5/WTIP/LIMD1/VGLL4/CIT/WWC1
BP	GO:0045540	regulation of cholesterol biosynthetic process	42	-0.620696	-1.35164	0.101313	0.631114	0.608977	1841	tags=26%, list=14%, signal=22%	SOD1/APOB/FGF1/IDI1/DHCR7/PMVK/CYP51A1/FASN/SREBF1/APOE/SCD
BP	GO:0106118	regulation of sterol biosynthetic process	42	-0.620696	-1.35164	0.101313	0.631114	0.608977	1841	tags=26%, list=14%, signal=22%	SOD1/APOB/FGF1/IDI1/DHCR7/PMVK/CYP51A1/FASN/SREBF1/APOE/SCD
BP	GO:1902369	negative regulation of RNA catabolic process	54	0.581851	1.32544	0.101351	0.631114	0.608977	1013	tags=15%, list=8%, signal=14%	IGF2BP1/NBAS/RBM24/AXIN2/LRPPRC/FUS/PABPC1/PKP3
CC	GO:0070993	translation preinitiation complex	16	0.735428	1.39913	0.101392	0.631114	0.608977	2923	tags=81%, list=23%, signal=63%	EIF3H/EIF3C/EIF3B/EIF3A/EIF2S1/EIF3M/EIF3I/EIF3E/EIF3G/EIF3F/EIF3L/EIF3D/EIF3K
BP	GO:0033046	negative regulation of sister chromatid segregation	38	-0.632253	-1.34878	0.101533	0.631114	0.608977	2056	tags=42%, list=16%, signal=35%	LCMT1/PCID2/BUB1/KNTC1/MAD2L1/NDC80/CDT1/DYNC1LI1/FBXO5/PLK1/BUB3/AURKB/CDC20/MAD2L1BP/GEN1/CCNB1
BP	GO:0033048	negative regulation of mitotic sister chromatid segregation	38	-0.632253	-1.34878	0.101533	0.631114	0.608977	2056	tags=42%, list=16%, signal=35%	LCMT1/PCID2/BUB1/KNTC1/MAD2L1/NDC80/CDT1/DYNC1LI1/FBXO5/PLK1/BUB3/AURKB/CDC20/MAD2L1BP/GEN1/CCNB1
BP	GO:2000816	negative regulation of mitotic sister chromatid separation	38	-0.632253	-1.34878	0.101533	0.631114	0.608977	2056	tags=42%, list=16%, signal=35%	LCMT1/PCID2/BUB1/KNTC1/MAD2L1/NDC80/CDT1/DYNC1LI1/FBXO5/PLK1/BUB3/AURKB/CDC20/MAD2L1BP/GEN1/CCNB1
BP	GO:0007043	cell-cell junction assembly	121	0.517178	1.30152	0.10158	0.631114	0.608977	1845	tags=24%, list=15%, signal=21%	TRPV4/FZD5/CLDN11/ACTB/VCL/CLDN10/WNT11/TLN2/PRKCH/CLDN1/TJP1/PARD6G/PARD3/DLG5/PKP3/ACE/ESAM/CDH8/CTNND2/GJD3/MARVELD2/CLDN20/MPP7/CDH24/CLDN3/POF1B/SRF/PRKCA/CLDN15
CC	GO:0031261	DNA replication preinitiation complex	12	-0.75736	-1.3716	0.101727	0.631497	0.609347	2553	tags=67%, list=20%, signal=53%	MCM7/CDC45/MCM6/MCM5/MCM3/GINS4/MCM2/MCM4
CC	GO:0097014	ciliary plasm	91	0.544673	1.32474	0.101996	0.632593	0.610404	1425	tags=19%, list=11%, signal=17%	CCDC113/RP1L1/DYNC2H1/GLI1/KIF19/CFAP46/DNAL1/NEK4/MNS1/NME8/DNAI1/PRKAR1A/CCDC63/DNAH10/DCX/ARFGEF2/DNAH5
BP	GO:0072089	stem cell proliferation	54	-0.582773	-1.32935	0.102151	0.632593	0.610404	1771	tags=17%, list=14%, signal=14%	GBA/KAT7/NES/WNT2B/CITED1/WNT5A/TERT/PTPRC/RUNX1
BP	GO:0002407	dendritic cell chemotaxis	14	-0.733316	-1.34228	0.102161	0.632593	0.610404	1481	tags=36%, list=12%, signal=32%	CXCR4/GPR183/SLAMF8/CCR1/CCR7
BP	GO:0071426	ribonucleoprotein complex export from nucleus	113	0.513827	1.28888	0.10245	0.632629	0.610439	2267	tags=20%, list=18%, signal=17%	NUP210/YTHDC1/SMG7/SEH1L/RPS15/NUP205/UPF1/SMG1/DDX19B/SUPT6H/RBM15B/THOC2/MCM3AP/NUP214/RANBP2/SETD2/NUP153/FYTTD1/EIF6/FIP1L1/NXF1/TPR/NUP98
BP	GO:0060402	calcium ion transport into cytosol	110	-0.503381	-1.25812	0.102703	0.632629	0.610439	1303	tags=18%, list=10%, signal=16%	ANK2/JPH3/TMBIM6/JPH1/SLC8A2/FKBP1B/SNCA/DRD2/PLA2G1B/XCR1/GRIN1/P2RY6/CXCL10/PTPRC/TMEM38A/FASLG/DMD/CCR7/CCL3/GRIN2C
BP	GO:0035418	protein localization to synapse	75	-0.539533	-1.29195	0.102752	0.632629	0.610439	1250	tags=16%, list=10%, signal=15%	DLG2/NRXN1/KIF5A/ASIC2/CPLX1/WNT5A/SNAP25/CLSTN1/STX1B/CNIH2/PCLO/GRIN2C
MF	GO:0044183	protein folding chaperone	27	0.675686	1.41307	0.102767	0.632629	0.610439	2155	tags=44%, list=17%, signal=37%	PDCL3/HSPA13/HSPB1/HSP90AB1/CCT2/HSPA8/CCT8/TCP1/FKBP8/CCT3/CALR/HSPA9
BP	GO:0048308	organelle inheritance	13	-0.746543	-1.35481	0.102767	0.632629	0.610439	64	tags=15%, list=1%, signal=15%	CDK1/MAP2K1
BP	GO:0048313	Golgi inheritance	13	-0.746543	-1.35481	0.102767	0.632629	0.610439	64	tags=15%, list=1%, signal=15%	CDK1/MAP2K1
BP	GO:0072337	modified amino acid transport	27	0.675067	1.41177	0.102767	0.632629	0.610439	30	tags=11%, list=0%, signal=11%	PDZK1/FOLR2/LRP2
CC	GO:0034774	secretory granule lumen	248	0.477012	1.29991	0.102908	0.632926	0.610726	922	tags=7%, list=7%, signal=7%	GCG/INS/PCSK1/AOC1/QPCT/PLAC8/FAM3C/SCG3/VCL/HGF/VPS13A/HSP90AB1/ACTN2/LRRC7/TGFB2/CCT2/CSTB/HSPA8
BP	GO:0048665	neuron fate specification	22	0.699938	1.37202	0.103093	0.632926	0.610726	1207	tags=18%, list=9%, signal=16%	FEV/ISL1/ATOH1/ISL2
BP	GO:1901798	positive regulation of signal transduction by p53 class mediator	19	0.715554	1.38664	0.103239	0.632926	0.610726	875	tags=26%, list=7%, signal=25%	RPL11/RPL23/RPS7/RPL26/PLA2R1
BP	GO:1900037	regulation of cellular response to hypoxia	11	0.772656	1.37726	0.103376	0.632926	0.610726	720	tags=18%, list=6%, signal=17%	DDAH1/KCNK2
BP	GO:0051956	negative regulation of amino acid transport	10	0.7781	1.3726	0.103594	0.632926	0.610726	125	tags=20%, list=1%, signal=20%	RGS2/HRH3
BP	GO:0051047	positive regulation of secretion	233	0.469795	1.27363	0.103604	0.632926	0.610726	1053	tags=8%, list=8%, signal=8%	GCG/INS/NMB/CFTR/PDX1/ISL1/RFX6/SLC12A2/APBB1/NR0B2/CHRNB2/SPHK2/CREB1/TGFB2/PLA2R1/ADAM9/INHBB/HIF1A/ANO1
BP	GO:0002831	regulation of response to biotic stimulus	269	-0.436789	-1.20872	0.103757	0.632926	0.610726	1086	tags=14%, list=9%, signal=13%	USP18/MR1/GRN/CD55/ADAM8/TBK1/CRTAM/PSMB6/HLA-A/SLAMF8/TIRAP/CYBA/DRD2/HAVCR2/WNT5A/SH2D1A/MED1/HLA-G/IL17F/RASGRP1/SLAMF6/VAV1/PSMB9/PSMB7/SIGIRR/A2M/IRF1/SYK/PSME2/SERPING1/PSMB8/CLEC10A/CD274/SH2D1B/APOE/CLNK/CLEC4D
BP	GO:0002448	mast cell mediated immunity	34	-0.635611	-1.32565	0.103922	0.632926	0.610726	827	tags=21%, list=7%, signal=19%	GATA2/RAC2/BLK/PIK3CD/SYK/CD84/CLNK
BP	GO:0043303	mast cell degranulation	34	-0.635611	-1.32565	0.103922	0.632926	0.610726	827	tags=21%, list=7%, signal=19%	GATA2/RAC2/BLK/PIK3CD/SYK/CD84/CLNK
MF	GO:0005126	cytokine receptor binding	137	-0.481289	-1.23976	0.104015	0.632926	0.610726	1749	tags=22%, list=14%, signal=19%	CFLAR/EPO/LRG1/S100A14/AMH/IL6ST/NES/ECM1/MIF/DAB2IP/CXCL8/LTA/CXCL2/CADM4/SMAD7/CKLF/TGFB3/BDNF/TRAF2/IL17F/IL36G/CXCL10/SYK/TLR9/TNFSF13B/FASLG/CSF1/TNFSF12/ITGB3/CCL3
BP	GO:0030218	erythrocyte differentiation	92	-0.519091	-1.27024	0.104205	0.632926	0.610726	1724	tags=28%, list=14%, signal=25%	EPO/KAT7/HOXA5/NCAPG2/TMOD3/BCL6/INHBA/FLVCR1/TAL1/MAFB/KLF1/GATA2/RB1/DMTN/TMEM14C/DNASE2/MED1/B2M/IKZF1/SLC4A1/MAEA/INPP5D/NCKAP1L/KLF13/SPI1/ALAS2
BP	GO:0019430	removal of superoxide radicals	16	-0.718729	-1.35088	0.104208	0.632926	0.610726	745	tags=25%, list=6%, signal=24%	SOD1/NFE2L2/FANCC/APOA4
BP	GO:0030866	cortical actin cytoskeleton organization	35	-0.627677	-1.323	0.104247	0.632926	0.610726	816	tags=17%, list=6%, signal=16%	AKAP11/PLEK/VPS4A/FMNL2/LCP1/NCKAP1L
BP	GO:0070201	regulation of establishment of protein localization	460	0.438176	1.23783	0.104308	0.632926	0.610726	1053	tags=10%, list=8%, signal=10%	GCG/INS/PDZK1/FZD5/CFTR/PDX1/CACNA1C/P3H1/GDI1/XPO4/ISL1/RFX6/DISP1/TRIM28/CEP135/NEUROD1/SIRT7/PTPN14/SLC16A1/SLC12A2/APBB1/IL12B/IPO5/STXBP5L/NR0B2/PCM1/LRRK2/ANK3/KCNC2/HSP90AB1/SSTR5/TENM1/TGFB2/CCT2/SRC/NR1D1/HSPA8/ADAM9/FAM3D/INHBB/CPT1A/SEC16A/SEC16B/APOD/HIF1A/ANO1
CC	GO:0043186	P granule	15	0.729131	1.37807	0.104418	0.632926	0.610726	1665	tags=53%, list=13%, signal=46%	HENMT1/MOV10L1/ASZ1/MOV10/TDRD9/PIWIL1/EXD1/TDRD5
BP	GO:0043968	histone H2A acetylation	15	0.730089	1.37988	0.104418	0.632926	0.610726	2362	tags=47%, list=19%, signal=38%	TRRAP/SPHK2/EP400/BRD8/MSL3/EPC1/MEAF6
CC	GO:0060293	germ plasm	15	0.729131	1.37807	0.104418	0.632926	0.610726	1665	tags=53%, list=13%, signal=46%	HENMT1/MOV10L1/ASZ1/MOV10/TDRD9/PIWIL1/EXD1/TDRD5
BP	GO:0061158	3'-UTR-mediated mRNA destabilization	15	0.728622	1.37711	0.104418	0.632926	0.610726	1984	tags=33%, list=16%, signal=28%	RBM24/UPF1/MOV10/ZC3H12A/ZFP36L1
BP	GO:0035690	cellular response to drug	50	0.595109	1.3436	0.104444	0.632926	0.610726	1632	tags=28%, list=13%, signal=25%	DDC/DPEP1/TH/SLC10A1/NCOA1/HSP90AB1/KCNQ1/MYC/PDE4A/HSF1/ANKRD1/EGFR/CAD/RECQL5
BP	GO:0042159	lipoprotein catabolic process	13	-0.746234	-1.35425	0.104743	0.633322	0.611108	2252	tags=46%, list=18%, signal=38%	ABHD12/ABHD10/APOB/NOTUM/CTSD/APOE
BP	GO:0051222	positive regulation of protein transport	247	0.475196	1.29512	0.104911	0.633322	0.611108	1053	tags=9%, list=8%, signal=9%	GCG/PDZK1/FZD5/CFTR/PDX1/XPO4/ISL1/RFX6/TRIM28/APBB1/IPO5/NR0B2/PCM1/ANK3/HSP90AB1/TENM1/TGFB2/SRC/ADAM9/SEC16A/SEC16B/HIF1A/ANO1
BP	GO:0034063	stress granule assembly	20	0.714799	1.37986	0.104938	0.633322	0.611108	2144	tags=45%, list=17%, signal=37%	UBAP2L/RPS23/CSDE1/EIF2S1/PRRC2C/MAPT/CIRBP/PRKAA2/DYNC1H1
BP	GO:0036003	positive regulation of transcription from RNA polymerase II promoter in response to stress	20	0.716842	1.38381	0.104938	0.633322	0.611108	2510	tags=50%, list=20%, signal=40%	ATF3/GCN1/DDIT3/NOTCH1/HIF1A/HSF1/RBPJ/VEGFA/KLF2/CHD6
CC	GO:0031091	platelet alpha granule	71	-0.545907	-1.2904	0.105066	0.633322	0.611108	2261	tags=32%, list=18%, signal=27%	F13A1/PLG/FERMT3/CD109/ORM1/SERPINE2/PCYOX1L/NHLRC2/KNG1/PDGFB/QSOX1/TMX3/FGG/SCCPDH/THBS1/VPS33B/SNCA/TGFB3/SELP/CLU/A2M/SERPING1/ITGB3
BP	GO:0033630	positive regulation of cell adhesion mediated by integrin	17	-0.710658	-1.36171	0.105159	0.633322	0.611108	392	tags=41%, list=3%, signal=40%	PODXL/CIB1/P2RY12/SKAP1/SYK/NCKAP1L/CD3E
BP	GO:0030278	regulation of ossification	91	-0.519232	-1.26673	0.105263	0.633322	0.611108	962	tags=18%, list=8%, signal=16%	DDR2/ADGRV1/SMAD7/TGFB3/WNT5A/ANKH/ATP2B1/CCR1/DHRS3/SGMS2/TMEM119/CALCA/CSF1/PTGER4/NELL1/CCL3
CC	GO:0035267	NuA4 histone acetyltransferase complex	16	0.725565	1.38037	0.105368	0.633322	0.611108	2362	tags=44%, list=19%, signal=36%	ACTB/TRRAP/EP400/BRD8/MSL3/EPC1/MEAF6
CC	GO:0043189	H4/H2A histone acetyltransferase complex	16	0.725565	1.38037	0.105368	0.633322	0.611108	2362	tags=44%, list=19%, signal=36%	ACTB/TRRAP/EP400/BRD8/MSL3/EPC1/MEAF6
CC	GO:0045495	pole plasm	16	0.729017	1.38693	0.105368	0.633322	0.611108	1665	tags=50%, list=13%, signal=44%	HENMT1/MOV10L1/ASZ1/MOV10/TDRD9/PIWIL1/EXD1/TDRD5
BP	GO:0003139	secondary heart field specification	10	0.777453	1.37146	0.105708	0.634447	0.612193	709	tags=40%, list=6%, signal=38%	LRP2/ISL1/WNT11/AXIN2
BP	GO:0008585	female gonad development	78	0.547657	1.31921	0.105727	0.634447	0.612193	1256	tags=17%, list=10%, signal=15%	FST/ADAMTS1/SLIT2/PGR/PCYT1B/NRIP1/VGF/SRC/ARID5B/INHBB/PDGFRA/PTPRN/SLIT3
BP	GO:2001256	regulation of store-operated calcium entry	10	-0.779878	-1.37252	0.10586	0.634731	0.612467	1757	tags=50%, list=14%, signal=43%	CASQ1/STIM1/EFHB/HOMER2/CD84
BP	GO:0071103	DNA conformation change	218	-0.446421	-1.20828	0.106115	0.635189	0.612909	1862	tags=17%, list=15%, signal=15%	CENPV/RFC3/MCM6/MCM5/CUL4A/RFC5/SIRT2/RAD51/MCM3/NCAPG2/GTF2H5/MCM2/ERCC6L/BANF1/RAD54L/UBN1/POLQ/DFFB/MCM4/NCAPD2/SMC5/SYCP1/HELLS/ASF1A/CENPK/CENPQ/CENPI/CENPT/CHAF1A/MCPH1/PPHLN1/WRNIP1/NCAPD3/NUSAP1/CENPN/MIS18A/CCNB1/CENPP
BP	GO:0034764	positive regulation of transmembrane transport	147	0.500668	1.29612	0.106195	0.635189	0.612909	967	tags=10%, list=8%, signal=9%	INS/PDZK1/CFTR/ACSL5/RYR2/SLC26A6/CLIP3/WNK1/ANK3/KCNC2/ADIPOR2/ACTN2/NR4A3/KCNQ1
BP	GO:0034767	positive regulation of ion transmembrane transport	147	0.500668	1.29612	0.106195	0.635189	0.612909	967	tags=10%, list=8%, signal=9%	INS/PDZK1/CFTR/ACSL5/RYR2/SLC26A6/CLIP3/WNK1/ANK3/KCNC2/ADIPOR2/ACTN2/NR4A3/KCNQ1
BP	GO:0016246	RNA interference	15	0.724755	1.3698	0.106426	0.636055	0.613745	1254	tags=27%, list=10%, signal=24%	HENMT1/ADAR/DICER1/DHX9
BP	GO:1903018	regulation of glycoprotein metabolic process	33	-0.633977	-1.32594	0.106589	0.636517	0.61419	2546	tags=33%, list=20%, signal=27%	ACOT8/NCSTN/ITM2B/RAB1A/ITM2C/RAMP1/ACER2/PXYLP1/CHP1/TMEM59/CCR7
BP	GO:0033604	negative regulation of catecholamine secretion	13	-0.742642	-1.34773	0.106719	0.636779	0.614443	1924	tags=46%, list=15%, signal=39%	CNR1/P2RY12/P2RY1/CRH/DRD2/ADRA2A
BP	GO:0045721	negative regulation of gluconeogenesis	13	0.755046	1.40005	0.106855	0.637072	0.614727	256	tags=15%, list=2%, signal=15%	INS/FAM3C
BP	GO:1905268	negative regulation of chromatin organization	42	-0.613705	-1.33642	0.106942	0.637076	0.61473	934	tags=12%, list=7%, signal=11%	ASF1A/SNCA/ATAD2/PAX5/SPI1
BP	GO:1901136	carbohydrate derivative catabolic process	153	-0.466721	-1.21805	0.107078	0.637373	0.615017	1771	tags=22%, list=14%, signal=19%	GBA/GALC/BGN/EDEM3/XDH/PGLYRP1/NEU1/ARSB/NT5C3A/NUDT15/SGSH/MGAT1/GALT/UNG/SPAM1/HEXB/NPL/SLC9A1/CSPG5/CELA1/CHP1/PDE7A/HYAL3/NUDT7/PRELP/LYG2/HPSE2/IDS/GLB1/PGLYRP2/ADA/NCAN/AMDHD2/HSPG2
BP	GO:1902807	negative regulation of cell cycle G1/S phase transition	82	-0.532904	-1.28252	0.107209	0.637638	0.615272	1196	tags=13%, list=9%, signal=12%	PRMT2/E2F1/CDK2/E2F8/SUSD2/E2F7/RB1/AURKA/GFI1B/MYO16/CCNB1
BP	GO:0030810	positive regulation of nucleotide biosynthetic process	14	0.744364	1.39286	0.107505	0.638107	0.615724	1376	tags=29%, list=11%, signal=26%	GUCA2A/PPARGC1A/GUCA1B/SLC25A12
BP	GO:1900373	positive regulation of purine nucleotide biosynthetic process	14	0.744364	1.39286	0.107505	0.638107	0.615724	1376	tags=29%, list=11%, signal=26%	GUCA2A/PPARGC1A/GUCA1B/SLC25A12
BP	GO:0032148	activation of protein kinase B activity	28	0.663274	1.39056	0.10757	0.638107	0.615724	5	tags=4%, list=0%, signal=4%	INS
CC	GO:0000922	spindle pole	145	-0.474198	-1.23489	0.10772	0.638107	0.615724	2150	tags=23%, list=17%, signal=20%	MISP/EMD/MAD2L1/TTC28/KATNAL1/CUL3/NEK6/DYNC1LI1/PLK1/KIF11/MAP10/AUNIP/DLGAP5/MTCL1/NUDCD2/POC1A/TUBG1/STAG1/CDC6/CKAP2L/TPX2/NUMA1/RGS14/CKAP2/PLK4/UNC119/AURKA/AURKB/CDC20/VPS4A/NEK2/PRC1/CCNB1/EML1
BP	GO:0051306	mitotic sister chromatid separation	61	-0.564666	-1.3143	0.10772	0.638107	0.615724	2705	tags=39%, list=21%, signal=31%	LCMT1/PCID2/DIS3L2/BUB1/KNTC1/CDC27/MAD2L1/NDC80/CDT1/CUL3/NEK6/DYNC1LI1/FBXO5/PLK1/BUB3/DLGAP5/CDC6/UBE2C/RB1/AURKB/CDC20/MAD2L1BP/GEN1/CCNB1
BP	GO:0002221	pattern recognition receptor signaling pathway	151	-0.467736	-1.22128	0.108108	0.638365	0.615974	1474	tags=19%, list=12%, signal=17%	CTSB/CLEC4E/UBE2D2/APOB/S100A14/NFKBIL1/FGG/NLRX1/DAB2IP/TLR3/TYRO3/FCRL3/TBK1/TRIL/TANK/TIRAP/CYBA/HAVCR2/TLR1/SLC46A2/TLR7/CTSS/PTPRS/IRF1/ITGB2/TLR9/LGMN/CTSK/SARM1
BP	GO:0007263	nitric oxide mediated signal transduction	23	0.691939	1.38149	0.108163	0.638365	0.615974	312	tags=17%, list=2%, signal=17%	INS/DDAH1/PDX1/NEUROD1
CC	GO:0005925	focal adhesion	381	0.44546	1.23184	0.108173	0.638365	0.615974	1348	tags=23%, list=11%, signal=21%	TRPV4/TNS2/FAP/SHROOM4/FLRT3/RPLP0/FOCAD/RPS11/RPS19/RPS9/ACTB/RPS16/RPL13A/RPS13/RPL12/XIRP2/SPRY4/RPS2/VCL/PAK4/RPL23/RPS8/RPL31/RPS3/RPL7A/RPS14/RPL10A/RPL30/AVIL/NEXN/HSPB1/RPL8/RPS15/P4HB/ITGB5/RPL4/TLN2/FAT1/RPL9/RPL37A/ITGA2/FLNB/RPS7/DAB2/BCAR3/RPL3/RPS4X/TNS3/MPZL1/RPS17/ACTN2/LPP/ITGBL1/RPL6/SLC9A3R2/RPS5/CD44/RPLP1/SRC/RPS18/RPS3A/SVIL/HSPA8/ADAM9/PABPC1/L1CAM/RPS10/RPL22/RPL7/RPS29/RD…
BP	GO:0015813	L-glutamate transmembrane transport	22	-0.682858	-1.3601	0.108317	0.638365	0.615974	1316	tags=36%, list=10%, signal=33%	ARL6IP5/SLC17A8/NTSR1/ARL6IP1/SLC1A1/SLC1A6/PER2/SLC17A7
BP	GO:0050994	regulation of lipid catabolic process	46	0.603997	1.33508	0.108407	0.638365	0.615974	656	tags=15%, list=5%, signal=14%	INS/AADAC/ENPP7/ACACB/LDLR/ABCD2/PNPLA2
BP	GO:0010332	response to gamma radiation	44	0.612208	1.34984	0.10846	0.638365	0.615974	6	tags=2%, list=0%, signal=2%	ELK1
BP	GO:0016925	protein sumoylation	69	0.540872	1.2822	0.10846	0.638365	0.615974	1867	tags=17%, list=15%, signal=15%	NUP210/TRIM28/HDAC4/SEH1L/NUP205/ZMIZ1/RNF212/RASD2/NUP214/RANBP2/TOPORS/NUP153
BP	GO:0007494	midgut development	13	-0.739514	-1.34206	0.108696	0.638365	0.615974	653	tags=23%, list=5%, signal=22%	WNT5A/FOXL1/ASS1
BP	GO:0033628	regulation of cell adhesion mediated by integrin	41	-0.614439	-1.33317	0.108818	0.638365	0.615974	707	tags=34%, list=6%, signal=32%	TESC/PODXL/CIB1/P2RY12/ACER2/SNAI2/SWAP70/SKAP1/PLAU/LPXN/ADA/SYK/NCKAP1L/CD3E
BP	GO:0006805	xenobiotic metabolic process	58	0.576036	1.31795	0.108844	0.638365	0.615974	215	tags=10%, list=2%, signal=10%	AOC1/DPEP1/AS3MT/AADAC/CYP1B1/CYP2W1
BP	GO:0035082	axoneme assembly	52	0.580475	1.31801	0.108889	0.638365	0.615974	1425	tags=25%, list=11%, signal=22%	RP1L1/FOXJ1/LRRC49/CFAP46/CFAP157/DNAL1/LRGUK/NEURL1/DNAI1/CCDC63/TTLL1/DCX/DNAH5
BP	GO:1904951	positive regulation of establishment of protein localization	263	0.469527	1.29063	0.108889	0.638365	0.615974	1053	tags=10%, list=8%, signal=9%	GCG/PDZK1/FZD5/CFTR/PDX1/XPO4/ISL1/RFX6/TRIM28/CEP135/APBB1/IPO5/NR0B2/PCM1/ANK3/HSP90AB1/TENM1/TGFB2/CCT2/SRC/ADAM9/SEC16A/SEC16B/HIF1A/ANO1
BP	GO:0005978	glycogen biosynthetic process	40	0.621353	1.36757	0.108974	0.638365	0.615974	5	tags=2%, list=0%, signal=3%	INS
BP	GO:0009250	glucan biosynthetic process	40	0.621353	1.36757	0.108974	0.638365	0.615974	5	tags=2%, list=0%, signal=3%	INS
BP	GO:0000963	mitochondrial RNA processing	16	0.721869	1.37333	0.109344	0.639399	0.616971	949	tags=12%, list=7%, signal=12%	FASTKD5/MTO1
CC	GO:0030132	clathrin coat of coated pit	14	0.738293	1.3815	0.109533	0.639399	0.616971	2116	tags=50%, list=17%, signal=42%	SGIP1/AP2A2/SYNJ1/CLTC/PICALM/AP2B1/EPS15
BP	GO:0060347	heart trabecula formation	10	0.772151	1.36211	0.109937	0.639399	0.616971	264	tags=20%, list=2%, signal=20%	ADAMTS1/ADGRG6
CC	GO:0071556	integral component of lumenal side of endoplasmic reticulum membrane	14	-0.731695	-1.33931	0.11002	0.639399	0.616971	1084	tags=43%, list=9%, signal=39%	SPPL2A/BCAP31/HLA-A/HLA-G/HLA-DPA1/HLA-DPB1
CC	GO:0098553	lumenal side of endoplasmic reticulum membrane	14	-0.731695	-1.33931	0.11002	0.639399	0.616971	1084	tags=43%, list=9%, signal=39%	SPPL2A/BCAP31/HLA-A/HLA-G/HLA-DPA1/HLA-DPB1
BP	GO:0035270	endocrine system development	108	0.521429	1.29438	0.110092	0.639399	0.616971	1159	tags=17%, list=9%, signal=15%	NKX6-2/PAX6/PDX1/TGFBR1/ISL1/RFX6/GLI1/NEUROD1/EIF2AK3/STRA6/WNT11/ONECUT1/INSM1/CREB1/ARID5B/SOX2/PDGFRA/ETS1
BP	GO:2000232	regulation of rRNA processing	12	0.758788	1.37622	0.110187	0.639399	0.616971	842	tags=17%, list=7%, signal=16%	SIRT7/HEATR1
BP	GO:0031663	lipopolysaccharide-mediated signaling pathway	37	-0.622034	-1.31656	0.110251	0.639399	0.616971	2334	tags=24%, list=18%, signal=20%	TNF/LTF/HCK/LBP/NFKBIL1/CD55/CD6/SIGIRR/CCL3
BP	GO:0043030	regulation of macrophage activation	37	-0.62223	-1.31698	0.110251	0.639399	0.616971	1426	tags=35%, list=11%, signal=31%	MIF/CST7/THBS1/GRN/CEBPA/CD200/HAVCR2/WNT5A/IL1RL1/CTSC/PTPRC/CCL3/HAMP
CC	GO:0072562	blood microparticle	65	-0.547425	-1.29007	0.110307	0.639399	0.616971	1999	tags=40%, list=16%, signal=34%	ORM1/CFH/APOA1/ITIH4/C3/KNG1/C4B/C8A/ITIH2/FGG/MSN/CIB2/VTN/GSN/CFB/C4BPA/CP/TFRC/CLU/A2M/SLC4A1/SERPING1/C1QC/HBE1/APOE/APOA4
CC	GO:0005930	axoneme	90	0.535681	1.29769	0.110619	0.639399	0.616971	1425	tags=18%, list=11%, signal=16%	CCDC113/RP1L1/DYNC2H1/GLI1/KIF19/CFAP46/DNAL1/MNS1/NME8/DNAI1/PRKAR1A/CCDC63/DNAH10/DCX/ARFGEF2/DNAH5
BP	GO:0003376	sphingosine-1-phosphate receptor signaling pathway	13	0.75106	1.39266	0.110887	0.639399	0.616971	1808	tags=31%, list=14%, signal=26%	GPR6/SPHK2/SPNS2/PIK3CG
CC	GO:0000307	cyclin-dependent protein kinase holoenzyme complex	38	-0.620717	-1.32417	0.111111	0.639399	0.616971	2577	tags=39%, list=20%, signal=32%	CDK6/CDKN2D/MNAT1/CCNF/CNPPD1/CDK1/PCNA/CKS1B/CDK14/CDK2/RB1/CCNB3/CCNA2/CCNE2/CCNB1
BP	GO:0097553	calcium ion transmembrane import into cytosol	98	-0.50801	-1.25428	0.111111	0.639399	0.616971	706	tags=18%, list=6%, signal=17%	ANK2/JPH3/JPH1/SLC8A2/FKBP1B/SNCA/DRD2/XCR1/GRIN1/P2RY6/CXCL10/PTPRC/TMEM38A/FASLG/DMD/CCR7/CCL3/GRIN2C
BP	GO:1903672	positive regulation of sprouting angiogenesis	18	0.715907	1.37452	0.111111	0.639399	0.616971	2474	tags=50%, list=19%, signal=40%	BMPER/IL10/TJP1/KLF4/JAK1/JMJD8/GHSR/S100A1/VEGFA
CC	GO:0005736	RNA polymerase I complex	10	-0.777785	-1.36884	0.111531	0.639399	0.616971	424	tags=20%, list=3%, signal=19%	POLR2F/POLR1E
MF	GO:0042288	MHC class I protein binding	10	-0.777725	-1.36873	0.111531	0.639399	0.616971	2092	tags=30%, list=16%, signal=25%	TAP1/TAP2/BCAP31
BP	GO:0045598	regulation of fat cell differentiation	101	0.525454	1.29653	0.111617	0.639399	0.616971	918	tags=9%, list=7%, signal=8%	INS/ANKRD26/TPH1/CCDC3/ASXL1/DDIT3/CREB1/MEX3C/NR1D1
BP	GO:0032799	low-density lipoprotein receptor particle metabolic process	11	-0.761018	-1.36857	0.111742	0.639399	0.616971	650	tags=27%, list=5%, signal=26%	MYLIP/ANXA2/APOE
BP	GO:0032802	low-density lipoprotein particle receptor catabolic process	11	-0.761018	-1.36857	0.111742	0.639399	0.616971	650	tags=27%, list=5%, signal=26%	MYLIP/ANXA2/APOE
CC	GO:0001401	SAM complex	11	0.764217	1.36222	0.111814	0.639399	0.616971	2155	tags=27%, list=17%, signal=23%	CHCHD6/MTX3/HSPA9
BP	GO:0042416	dopamine biosynthetic process	11	0.765516	1.36454	0.111814	0.639399	0.616971	831	tags=27%, list=7%, signal=26%	DDC/TH/TGFB2
CC	GO:0140275	MIB complex	11	0.764217	1.36222	0.111814	0.639399	0.616971	2155	tags=27%, list=17%, signal=23%	CHCHD6/MTX3/HSPA9
BP	GO:0042445	hormone metabolic process	155	0.489229	1.27525	0.111842	0.639399	0.616971	839	tags=10%, list=7%, signal=10%	PCSK2/PCSK1/SCG5/CYP1B1/DHRS13/CYP27B1/CYP2W1/FDX1/SLCO1C1/PLB1/ECE2/PPARGC1A/GFI1/PNPLA2/RETSAT/RDH13
BP	GO:0045165	cell fate commitment	195	0.471881	1.25686	0.111842	0.639399	0.616971	1596	tags=17%, list=13%, signal=15%	NKX6-2/FEV/PAX6/WNT7A/TGFBR1/ISL1/FGFR2/NEUROD1/SOX5/TBX2/ROR2/WNT9A/IL12B/PTF1A/WNT11/ONECUT1/CDON/ATOH1/NOTCH1/PROX1/SOX2/DSCAML1/NOTCH2/ZFPM1/ISL2/NR2F2/PTCH1/PRDM1/SMO/MYOD1/TBX22/ARX/ERBB4
BP	GO:0051791	medium-chain fatty acid metabolic process	10	0.769668	1.35773	0.112051	0.639399	0.616971	893	tags=30%, list=7%, signal=28%	ACOT7/CROT/ABHD2
BP	GO:0036336	dendritic cell migration	19	-0.694143	-1.35647	0.112205	0.639399	0.616971	1481	tags=26%, list=12%, signal=23%	CXCR4/GPR183/SLAMF8/CCR1/CCR7
MF	GO:0008381	mechanosensitive ion channel activity	12	0.754317	1.36811	0.112266	0.639399	0.616971	11	tags=8%, list=0%, signal=8%	TRPV4
BP	GO:0002705	positive regulation of leukocyte mediated immunity	74	-0.535861	-1.28285	0.112339	0.639399	0.616971	1324	tags=26%, list=10%, signal=23%	LAMP1/LTA/MR1/MLH1/CRTAM/HLA-A/TFRC/SH2D1A/B2M/TRAF2/HLA-G/RASGRP1/SLAMF6/VAV1/PTPRC/ITGB2/SASH3/SH2D1B/CLNK
BP	GO:0000303	response to superoxide	20	-0.682885	-1.34631	0.112403	0.639399	0.616971	745	tags=30%, list=6%, signal=28%	SOD2/GLRX2/SOD1/NFE2L2/FANCC/APOA4
BP	GO:0032479	regulation of type I interferon production	95	-0.51278	-1.25695	0.112523	0.639399	0.616971	1453	tags=14%, list=11%, signal=12%	NLRX1/TAX1BP1/TLR3/SIRPA/TBK1/TIRAP/HAVCR2/TLR7/PTPRS/IRF1/SYK/TLR9/IRF8
BP	GO:0006888	endoplasmic reticulum to Golgi vesicle-mediated transport	176	0.475392	1.2534	0.112554	0.639399	0.616971	1062	tags=6%, list=8%, signal=6%	INS/AREG/PGAP1/SCAP/GOLGB1/LRRK2/ANK3/SEC16A/SEC16B/GRIA1/ANK1
BP	GO:0009408	response to heat	129	0.501223	1.27835	0.112613	0.639399	0.616971	935	tags=12%, list=7%, signal=11%	TRPV4/SST/CHORDC1/NUP210/PDCL3/MAP2K7/HMOX1/SEH1L/CREBBP/NUP205/HSP90AB1/RPTOR/SLC52A3/HSPA8/EIF2S1
BP	GO:0046545	development of primary female sexual characteristics	82	0.540607	1.31127	0.112798	0.639399	0.616971	1256	tags=16%, list=10%, signal=14%	FST/ADAMTS1/SLIT2/PGR/PCYT1B/NRIP1/VGF/SRC/ARID5B/INHBB/PDGFRA/PTPRN/SLIT3
BP	GO:0002673	regulation of acute inflammatory response	30	0.644719	1.36709	0.112903	0.639399	0.616971	178	tags=7%, list=1%, signal=7%	INS/IL20RB
BP	GO:0071450	cellular response to oxygen radical	17	-0.701636	-1.34443	0.113095	0.639399	0.616971	745	tags=35%, list=6%, signal=33%	SOD2/GLRX2/SOD1/NFE2L2/FANCC/APOA4
BP	GO:0071451	cellular response to superoxide	17	-0.701636	-1.34443	0.113095	0.639399	0.616971	745	tags=35%, list=6%, signal=33%	SOD2/GLRX2/SOD1/NFE2L2/FANCC/APOA4
BP	GO:0051353	positive regulation of oxidoreductase activity	47	0.594868	1.31547	0.113122	0.639399	0.616971	206	tags=4%, list=2%, signal=4%	INS/CYP27B1
BP	GO:1903038	negative regulation of leukocyte cell-cell adhesion	78	-0.533146	-1.28033	0.113139	0.639399	0.616971	1060	tags=23%, list=8%, signal=21%	PPARA/BCL6/DUSP3/LOXL3/SMAD7/CRTAM/NRARP/HAVCR2/HLA-G/ADTRP/TIGIT/RUNX3/IRF1/LRRC32/ASS1/TWSG1/CD274/RUNX1
BP	GO:0030203	glycosaminoglycan metabolic process	128	-0.477477	-1.22282	0.113274	0.639399	0.616971	2000	tags=29%, list=16%, signal=25%	GPC6/SLC35D2/DCN/GNS/SMPD3/ITIH4/PDGFB/CHST6/BGN/ITIH3/ITIH2/PGLYRP1/B4GALT3/ARSB/SGSH/SPOCK2/PXYLP1/SPAM1/HEXB/SLC9A1/B4GALT1/CSPG5/B3GNT3/CHP1/B3GNT2/B3GAT2/HYAL3/PRELP/LYG2/HPSE2/IDS/GLB1/NDST4/PGLYRP2/NCAN/ABCC5/HSPG2
BP	GO:0010743	regulation of macrophage derived foam cell differentiation	23	-0.67122	-1.34324	0.113281	0.639399	0.616971	381	tags=22%, list=3%, signal=21%	APOB/PPARA/CRP/CSF1/ITGB3
BP	GO:0042430	indole-containing compound metabolic process	19	0.705275	1.36672	0.11336	0.639399	0.616971	65	tags=11%, list=1%, signal=10%	DDC/TPH1
BP	GO:0071539	protein localization to centrosome	31	0.634628	1.35675	0.11336	0.639399	0.616971	603	tags=19%, list=5%, signal=18%	CEP250/STIL/CEP192/GOLGB1/PCM1/C2CD3
BP	GO:0045912	negative regulation of carbohydrate metabolic process	37	0.619071	1.36258	0.113402	0.639399	0.616971	1376	tags=30%, list=11%, signal=27%	INS/FAM3C/HDAC4/PPARGC1A/PASK/SIK1/NCOR1/SOGA1/CLTC/MIDN/SLC25A12
BP	GO:0089718	amino acid import across plasma membrane	37	0.617244	1.35856	0.113402	0.639399	0.616971	209	tags=11%, list=2%, signal=11%	RGS2/SLC22A2/SLC7A1/SLC7A3
BP	GO:0006586	indolalkylamine metabolic process	14	0.734687	1.37475	0.11359	0.639399	0.616971	65	tags=14%, list=1%, signal=14%	DDC/TPH1
MF	GO:0032183	SUMO binding	14	0.735015	1.37537	0.11359	0.639399	0.616971	2171	tags=36%, list=17%, signal=30%	SOBP/HERC2/USPL1/RNF111/USP25
BP	GO:0051099	positive regulation of binding	142	0.504108	1.30075	0.113839	0.639399	0.616971	757	tags=11%, list=6%, signal=10%	GCG/PAX6/PDX1/HAND2/ISL1/CAPRIN2/TRIM28/MMP9/EIF3C/NEUROD1/RPL11/LRRK2/ITGA2/HSP90AB1/RFNG
BP	GO:0051216	cartilage development	150	0.497066	1.28639	0.113839	0.639399	0.616971	1615	tags=23%, list=13%, signal=20%	TRPV4/WNT7A/TGFBR1/HAND2/MAF/LRP6/BMP1/EVC/EIF2AK3/SOX5/ROR2/WNT9A/BMP3/SLC39A14/WNT11/AXIN2/SULF1/MEX3C/CD44/COL27A1/COL2A1/HIF1A/GDF6/FGF18/NFIB/HAND1/TRIP11/MEF2D/GREM1/GNAS/LUM/FGF4/CYTL1/STC1
BP	GO:0002279	mast cell activation involved in immune response	35	-0.62599	-1.31945	0.1139	0.639399	0.616971	827	tags=20%, list=7%, signal=19%	GATA2/RAC2/BLK/PIK3CD/SYK/CD84/CLNK
BP	GO:1905818	regulation of chromosome separation	65	-0.542967	-1.27956	0.113924	0.639399	0.616971	2717	tags=38%, list=21%, signal=30%	MOS/LCMT1/PCID2/BUB1/KNTC1/CDC27/MAD2L1/NDC80/CDT1/CUL3/NEK6/DYNC1LI1/FBXO5/PLK1/BUB3/DLGAP5/CDC6/UBE2C/NUMA1/RB1/AURKB/CDC20/MAD2L1BP/GEN1/CCNB1
BP	GO:0045930	negative regulation of mitotic cell cycle	256	-0.437591	-1.20436	0.11413	0.639399	0.616971	2064	tags=19%, list=16%, signal=16%	MDC1/MAD2L1/RGCC/USP47/NDC80/CDT1/PRCC/CDK1/PCNA/DDIAS/PSMA8/DYNC1LI1/FBXO5/ZFYVE19/PLK1/BRINP3/BUB3/TIPIN/BCL6/PRMT2/BRSK1/E2F1/CDC6/CDK2/FANCD2/E2F8/PSMB6/E2F7/RB1/DONSON/SLC9A3R1/MCPH1/ZWILCH/AURKA/AURKB/CDC20/VPS4A/ORC1/GFI1B/PSMB9/PSMB7/MAD2L1BP/GPR132/MYO16/PSME2/GEN1/PSMB8/CCNB1
BP	GO:0016331	morphogenesis of embryonic epithelium	124	0.511834	1.28924	0.114155	0.639399	0.616971	1466	tags=15%, list=12%, signal=14%	LRP2/PDX1/SEMA4C/FGFR2/STIL/LRP6/VANGL2/SIX4/RPS7/CELSR1/SULF1/TGFB2/LAMA5/HIF1A/TSC2/PTCH1/HAND1/GREM1/FUZ
BP	GO:0071772	response to BMP	127	0.50596	1.28175	0.114155	0.639399	0.616971	1093	tags=14%, list=9%, signal=13%	LRP2/BMPER/FST/GREM2/ACVR2A/SMAD9/ROR2/MEGF8/FOXD1/NEO1/SULF1/TGFB2/NOTCH1/COL2A1/RGMA/PHOX2B/GDF6/NOTCH2
BP	GO:0071773	cellular response to BMP stimulus	127	0.50596	1.28175	0.114155	0.639399	0.616971	1093	tags=14%, list=9%, signal=13%	LRP2/BMPER/FST/GREM2/ACVR2A/SMAD9/ROR2/MEGF8/FOXD1/NEO1/SULF1/TGFB2/NOTCH1/COL2A1/RGMA/PHOX2B/GDF6/NOTCH2
BP	GO:0090087	regulation of peptide transport	461	0.4354	1.22863	0.114155	0.639399	0.616971	1140	tags=11%, list=9%, signal=10%	GCG/INS/PDZK1/FZD5/CFTR/PDX1/CACNA1C/P3H1/GDI1/XPO4/ISL1/RFX6/DISP1/TRIM28/NEUROD1/SIRT7/PTPN14/SLC16A1/SLC12A2/APBB1/SLC26A6/IL12B/IPO5/STXBP5L/NR0B2/PCM1/LRRK2/ANK3/KCNC2/HSP90AB1/PASK/SSTR5/TENM1/TGFB2/SRC/NR1D1/HSPA8/ADAM9/FAM3D/INHBB/CPT1A/SEC16A/SEC16B/APOD/HIF1A/ANO1/UMOD/CHD7/ZDHHC2/NPY2R
MF	GO:0045294	alpha-catenin binding	10	0.768156	1.35506	0.114165	0.639399	0.616971	1986	tags=40%, list=16%, signal=34%	VCL/PKP3/PTPRT/NUMB
BP	GO:0002700	regulation of production of molecular mediator of immune response	88	-0.521664	-1.27302	0.114338	0.639399	0.616971	1278	tags=27%, list=10%, signal=25%	BCL6/TLR3/TMBIM6/PARP3/MLH1/SLC7A5/FCRL3/SMAD7/TGFB3/TRIL/HLA-A/XBP1/SEMA7A/TFRC/WNT5A/B2M/TRAF2/HLA-G/IL17F/PTPRC/TLR9/SASH3/CLNK/TNFRSF1B
BP	GO:0007039	protein catabolic process in the vacuole	17	0.716687	1.37041	0.114458	0.639399	0.616971	536	tags=18%, list=4%, signal=17%	LRP2/LDLR/VPS13A
CC	GO:0031904	endosome lumen	26	0.666412	1.39753	0.114563	0.639399	0.616971	679	tags=19%, list=5%, signal=18%	INS/LRP2/IL12B/PRF1/PDLIM4
BP	GO:0009409	response to cold	38	0.615992	1.35861	0.114583	0.639399	0.616971	808	tags=18%, list=6%, signal=17%	ZNF516/TRPA1/PLAC8/GMPR/EIF2AK3/PPARGC1A/VGF
BP	GO:0034198	cellular response to amino acid starvation	38	0.617869	1.36275	0.114583	0.639399	0.616971	935	tags=18%, list=7%, signal=17%	ATF3/MIOS/GCN1/SZT2/EIF2AK3/SEH1L/EIF2S1
BP	GO:0007379	segment specification	13	-0.735423	-1.33463	0.114625	0.639399	0.616971	2431	tags=38%, list=19%, signal=31%	DLL1/HES5/MAFB/MSGN1/DVL2
BP	GO:0045655	regulation of monocyte differentiation	17	-0.700774	-1.34278	0.115079	0.639399	0.616971	508	tags=24%, list=4%, signal=23%	GPR68/ZBTB46/INPP5D/CSF1
BP	GO:0032606	type I interferon production	96	-0.512267	-1.25846	0.115108	0.639399	0.616971	1453	tags=14%, list=11%, signal=12%	NLRX1/TAX1BP1/TLR3/SIRPA/TBK1/TIRAP/HAVCR2/TLR7/PTPRS/IRF1/SYK/TLR9/IRF8
BP	GO:0000098	sulfur amino acid catabolic process	12	-0.75168	-1.36132	0.115163	0.639399	0.616971	1357	tags=33%, list=11%, signal=30%	MTRR/CDO1/CSAD/MAT1A
MF	GO:0005313	L-glutamate transmembrane transporter activity	12	-0.751192	-1.36043	0.115163	0.639399	0.616971	1316	tags=25%, list=10%, signal=22%	SLC1A1/SLC1A6/SLC17A7
BP	GO:0016322	neuron remodeling	12	-0.751553	-1.36109	0.115163	0.639399	0.616971	512	tags=25%, list=4%, signal=24%	C3/ADGRB3/C1QA
BP	GO:0150105	protein localization to cell-cell junction	20	0.704329	1.35965	0.115226	0.639399	0.616971	861	tags=25%, list=7%, signal=23%	DSP/ACTB/VCL/TJP1/DLG5
BP	GO:0045840	positive regulation of mitotic nuclear division	40	0.617016	1.35802	0.115385	0.639399	0.616971	5	tags=2%, list=0%, signal=3%	INS
BP	GO:0032770	positive regulation of monooxygenase activity	28	0.656503	1.37637	0.115538	0.639399	0.616971	206	tags=7%, list=2%, signal=7%	INS/CYP27B1
BP	GO:0042698	ovulation cycle	52	0.576282	1.30849	0.115556	0.639399	0.616971	1861	tags=31%, list=15%, signal=26%	ADAMTS1/SLIT2/PGR/NCOA1/NRIP1/TGFB2/SRC/PDGFRA/ETS1/PTPRN/SLIT3/OPRM1/EGFR/FZD4/MSTN/GNRH1
BP	GO:0043558	regulation of translational initiation in response to stress	14	0.723994	1.35474	0.115619	0.639399	0.616971	2150	tags=36%, list=17%, signal=30%	EIF2AK3/EIF2S1/IMPACT/EIF2AK4/PPP1R15B
BP	GO:0046942	carboxylic acid transport	209	0.465172	1.2483	0.115813	0.639399	0.616971	1376	tags=18%, list=11%, signal=16%	NMB/FOLR2/LRP2/RGS2/SLC16A6/HRH3/SLC22A2/SLC10A2/SLC7A1/SLC7A3/SLC10A1/SLCO1C1/SLC35D1/SLC16A1/SLC12A2/SLC26A6/STRA6/NR0B2/SLC22A6/NCOA2/NCOA1/ABCC4/SLC26A5/SLC38A3/SLC47A1/PLA2R1/SLC5A6/ABCC1/SLC25A15/UMOD/LRRC8E/OC90/ACE/SLC23A1/PLA2G4A/SLC32A1/SLC25A12
MF	GO:0017171	serine hydrolase activity	104	0.512821	1.27548	0.116071	0.639399	0.616971	270	tags=8%, list=2%, signal=8%	PCSK2/PCSK1/TMPRSS15/FAP/KLK15/AADAC/RHBDL1/MMP9
BP	GO:0044106	cellular amine metabolic process	133	0.506397	1.28995	0.116071	0.639399	0.616971	168	tags=5%, list=1%, signal=4%	INS/AOC1/DDC/TPH1/HAND2/TH
BP	GO:0031343	positive regulation of cell killing	31	-0.638949	-1.32663	0.116142	0.639399	0.616971	1324	tags=39%, list=10%, signal=35%	LAMP1/MR1/CRTAM/HLA-A/SH2D1A/B2M/HLA-G/RASGRP1/SLAMF6/VAV1/PTPRC/SYK
BP	GO:0071322	cellular response to carbohydrate stimulus	110	0.504873	1.26081	0.116331	0.639399	0.616971	588	tags=9%, list=5%, signal=9%	GCG/CFTR/PDX1/TH/RFX6/NEUROD1/SLC2A5/SLC26A6/PPARGC1A/SLC39A14
BP	GO:0051349	positive regulation of lyase activity	15	0.715251	1.35184	0.116466	0.639399	0.616971	102	tags=13%, list=1%, signal=13%	GUCA2A/CACNA1C
BP	GO:0010965	regulation of mitotic sister chromatid separation	59	-0.566473	-1.31277	0.116487	0.639399	0.616971	2196	tags=39%, list=17%, signal=32%	LCMT1/PCID2/BUB1/KNTC1/CDC27/MAD2L1/NDC80/CDT1/CUL3/NEK6/DYNC1LI1/FBXO5/PLK1/BUB3/DLGAP5/CDC6/UBE2C/RB1/AURKB/CDC20/MAD2L1BP/GEN1/CCNB1
BP	GO:0006406	mRNA export from nucleus	96	0.525755	1.29099	0.116592	0.639399	0.616971	2267	tags=22%, list=18%, signal=18%	NUP210/YTHDC1/SMG7/SEH1L/NUP205/UPF1/SMG1/DDX19B/SUPT6H/RBM15B/THOC2/MCM3AP/NUP214/RANBP2/SETD2/NUP153/FYTTD1/FIP1L1/NXF1/TPR/NUP98
BP	GO:0071427	mRNA-containing ribonucleoprotein complex export from nucleus	96	0.525755	1.29099	0.116592	0.639399	0.616971	2267	tags=22%, list=18%, signal=18%	NUP210/YTHDC1/SMG7/SEH1L/NUP205/UPF1/SMG1/DDX19B/SUPT6H/RBM15B/THOC2/MCM3AP/NUP214/RANBP2/SETD2/NUP153/FYTTD1/FIP1L1/NXF1/TPR/NUP98
BP	GO:0072659	protein localization to plasma membrane	241	0.464867	1.2635	0.116592	0.639399	0.616971	1844	tags=20%, list=15%, signal=17%	INS/PDZK1/AMN/LRP6/ACTB/CSRP3/MYADM/CLIP3/RAB40C/ANK3/PRKCH/DAB2/ACTN2/SLC9A3R2/MRAP2/LAMA5/SEC16A/RAB26/TTC7A/PKP3/ANK1/NSG1/RDX/GPR158/ZDHHC2/ATP2B4/SPTBN1/PTCH1/PLS1/CLTC/SCN3B/LDLRAP1/PIP5K1A/PRKG2/RAB40B/EGFR/PLEKHF1/ATP1B3/KIF13A/PDZD3/LRP1/LGALS3/CCDC88A/PREPL/GRIP1/TPBG/PICALM/EHD2
BP	GO:0002507	tolerance induction	13	-0.734244	-1.33249	0.116601	0.639399	0.616971	1124	tags=54%, list=9%, signal=49%	XKR8/CCR4/HAVCR2/BLK/HLA-G/CD3E/CD274
BP	GO:0006884	cell volume homeostasis	27	0.6634	1.38737	0.116601	0.639399	0.616971	387	tags=11%, list=3%, signal=11%	TRPV4/SCTR/SLC12A2
BP	GO:0044794	positive regulation by host of viral process	13	-0.733877	-1.33183	0.116601	0.639399	0.616971	54	tags=23%, list=0%, signal=23%	CAV2/CSF1R/APOE
BP	GO:1990000	amyloid fibril formation	21	-0.680098	-1.34621	0.116959	0.63974	0.617301	1126	tags=24%, list=9%, signal=22%	GSN/CRYAB/B2M/CLU/APOE
BP	GO:0009308	amine metabolic process	136	0.497275	1.27462	0.116998	0.63974	0.617301	168	tags=4%, list=1%, signal=4%	INS/AOC1/DDC/TPH1/HAND2/TH
BP	GO:0046530	photoreceptor cell differentiation	49	0.586578	1.31392	0.117117	0.63974	0.617301	1356	tags=27%, list=11%, signal=24%	RP1L1/SDK2/TH/FSCN2/NKD1/PDE6C/RDH13/NOTCH1/CRB1/DIO3/DCX/USH1C/MFRP
BP	GO:0061448	connective tissue development	197	0.464771	1.24232	0.117137	0.63974	0.617301	1069	tags=16%, list=8%, signal=15%	TRPV4/ZNF516/WNT7A/TGFBR1/HAND2/MAF/LRP6/BMP1/EVC/EIF2AK3/SOX5/ROR2/WNT9A/BMP3/FOXD1/PPARGC1A/SLC39A14/WNT11/AXIN2/SULF1/NOTCH1/MEX3C/CD44/ARID5B/COL27A1/COL2A1/ACTA2/HIF1A/GDF6/FGF18/SLC25A25
BP	GO:0031281	positive regulation of cyclase activity	16	0.713615	1.35763	0.117296	0.63974	0.617301	102	tags=12%, list=1%, signal=12%	GUCA2A/CACNA1C
BP	GO:0051301	cell division	499	-0.396507	-1.15372	0.117338	0.63974	0.617301	2082	tags=22%, list=16%, signal=20%	CCSAP/ARL8B/MAP9/MAD2L1/RHOA/TTC28/NDC80/CDT1/TGFA/CUL3/TP63/TOPAZ1/CDK1/BTC/STMN1/CENPV/NEK6/DYNC1LI1/FBXO5/PDGFB/SHH/CIB1/ZFYVE19/RBBP8/RAB11FIP4/SIRT2/PLK1/CKS1B/NCAPG2/PARD6A/KLHL18/BABAM1/FGF1/RHOB/BRCA2/CSNK1A1/KIF11/TRIM36/MAP10/TERF1/BUB3/RAB35/ANAPC16/TIPIN/CABLES1/CDK14/CEP55/ACTR2/ZFYVE26/KIF23/ERCC6L/GNAI1/SPC24/NUP37/FZD7/NCAPD2/STAG1/SMC5/SYCP1/CDC6/HELLS/ACTR8/TAL1/CDK2/ARHGEF2/RAB…
BP	GO:0009410	response to xenobiotic stimulus	67	0.541552	1.28084	0.117391	0.63974	0.617301	215	tags=9%, list=2%, signal=9%	AOC1/DPEP1/AS3MT/AADAC/CYP1B1/CYP2W1
BP	GO:0008631	intrinsic apoptotic signaling pathway in response to oxidative stress	37	0.607652	1.33745	0.117526	0.63974	0.617301	597	tags=14%, list=5%, signal=13%	INS/CYP1B1/PDK1/HSPB1/P4HB
BP	GO:0035066	positive regulation of histone acetylation	25	0.666368	1.3706	0.11753	0.63974	0.617301	711	tags=12%, list=6%, signal=11%	ISL1/PPARGC1A/SPHK2
BP	GO:0070633	transepithelial transport	25	0.666259	1.37037	0.11753	0.63974	0.617301	1253	tags=28%, list=10%, signal=25%	CFTR/ACTB/SLC12A2/SLC26A6/ABCC1/CXADR/SLC23A1
BP	GO:0042987	amyloid precursor protein catabolic process	43	-0.598464	-1.30707	0.117757	0.640504	0.618038	406	tags=12%, list=3%, signal=11%	RTN3/PSEN2/NTRK2/CLU/APOE
BP	GO:0045216	cell-cell junction organization	168	0.474285	1.24252	0.11804	0.641571	0.619068	1576	tags=21%, list=12%, signal=19%	TRPV4/FZD5/SDK2/GRHL1/TGFBR1/DSP/CLDN11/ACTB/VCL/KIFC3/CLDN10/WNT11/TLN2/PRKCH/CLDN1/TJP1/PARD6G/TGFB2/PARD3/DLG5/SRC/PKP3/CXADR/RDX/ACE/ESAM/CDH8/PTPN23/CTNND2/NLGN4X/GJD3/MARVELD2/CLDN20/MPP7/CDH24/PLEKHA7
BP	GO:2001242	regulation of intrinsic apoptotic signaling pathway	114	0.504173	1.26584	0.118304	0.64253	0.619993	1114	tags=15%, list=9%, signal=14%	INS/PDX1/MMP9/EIF2AK3/RPL11/RPS3/HSPB1/P4HB/LRRK2/DDIT3/RPS7/RPL26/IL20RA/CD44/SRC/HIF1A/TPT1
BP	GO:0019362	pyridine nucleotide metabolic process	30	-0.645123	-1.33759	0.118577	0.642793	0.620246	2024	tags=30%, list=16%, signal=25%	AFMID/PARP10/QPRT/NMRK2/NMNAT1/ACMSD/NADK/IDO2/SARM1
BP	GO:0046496	nicotinamide nucleotide metabolic process	30	-0.645123	-1.33759	0.118577	0.642793	0.620246	2024	tags=30%, list=16%, signal=25%	AFMID/PARP10/QPRT/NMRK2/NMNAT1/ACMSD/NADK/IDO2/SARM1
BP	GO:0051983	regulation of chromosome segregation	78	-0.529428	-1.27141	0.118613	0.642793	0.620246	2797	tags=40%, list=22%, signal=31%	RCC2/MOS/LCMT1/PCID2/BUB1/MKI67/KNTC1/CDC27/MAD2L1/RMI2/NDC80/CDT1/CUL3/NEK6/DYNC1LI1/FBXO5/SIRT2/PLK1/BUB3/DLGAP5/SMC5/CDC6/KIF2C/UBE2C/NUMA1/RB1/AURKB/CDC20/MAD2L1BP/GEN1/CCNB1
BP	GO:0071498	cellular response to fluid shear stress	15	-0.717669	-1.33779	0.119048	0.643842	0.621258	187	tags=20%, list=1%, signal=20%	NFE2L2/CA2/ASS1
CC	GO:0071162	CMG complex	10	-0.772002	-1.35866	0.119093	0.643842	0.621258	2553	tags=70%, list=20%, signal=56%	MCM7/MCM6/MCM5/MCM3/GINS4/MCM2/MCM4
BP	GO:0001657	ureteric bud development	74	0.531994	1.27129	0.119826	0.643842	0.621258	1439	tags=20%, list=11%, signal=18%	BMPER/SLIT2/FGFR2/FOXJ1/FOXD1/WNT11/SIX4/FMN1/LAMA5/CRLF1/MYC/PTCH1/GREM1/LZTS2/SMO
MF	GO:0051879	Hsp90 protein binding	36	0.611735	1.33586	0.119835	0.643842	0.621258	1769	tags=33%, list=14%, signal=29%	CHORDC1/NPAS2/EIF2AK3/SLC12A2/RPS3/HIF1A/TSC2/AHR/KDR/HSF1/MAPT/ARNTL
BP	GO:0014009	glial cell proliferation	37	-0.612743	-1.2969	0.119923	0.643842	0.621258	1195	tags=24%, list=9%, signal=22%	LTA/E2F1/CERS2/MYB/CLU/ADCYAP1/EEF2/CSF1/CSF1R
BP	GO:0044262	cellular carbohydrate metabolic process	226	0.454312	1.23227	0.12	0.643842	0.621258	1446	tags=15%, list=11%, signal=14%	GCG/INS/LALBA/STK40/FAM3C/INPP5J/SIRT7/ACACB/HAS3/PDK1/HDAC4/PHKA2/GANC/PPARGC1A/NCOA2/PASK/SIK1/NKX1-1/XYLB/NCOR1/SRC/NR1D1/SOGA1/PRKAG2/INSR/PGAM1/SYNJ1/MTMR7/DYRK2/PLA2G4A/MIDN/IPPK/SLC25A12/GPT/PPIP5K1
MF	GO:0072341	modified amino acid binding	60	0.562954	1.30201	0.12	0.643842	0.621258	922	tags=12%, list=7%, signal=11%	FOLR2/DPEP1/SYTL2/FTCDNL1/SYT12/CPS1/HSPA8
BP	GO:0043491	protein kinase B signaling	194	0.460939	1.2274	0.120087	0.643842	0.621258	1156	tags=11%, list=9%, signal=10%	INS/KLB/LRP2/AREG/TGFBR1/PTPRJ/FGFR2/MAGI2/SEMA5A/HGF/HIP1/DDIT3/FGF5/HSP90AB1/SRC/FGF7/FGF18/INSR/TSC2/PDGFRA/RICTOR
BP	GO:0034123	positive regulation of toll-like receptor signaling pathway	20	-0.673543	-1.32789	0.120155	0.643842	0.621258	1228	tags=40%, list=10%, signal=36%	TLR5/LTF/LBP/TLR3/TIRAP/CYBA/TLR1/TLR9
MF	GO:0035259	glucocorticoid receptor binding	11	0.757069	1.34948	0.120253	0.643842	0.621258	1774	tags=36%, list=14%, signal=31%	NR4A1/NRIP1/NR4A3/GRIP1
BP	GO:0044772	mitotic cell cycle phase transition	489	-0.394981	-1.14746	0.120629	0.643842	0.621258	2598	tags=24%, list=20%, signal=19%	NASP/BRSK2/TFDP1/CDK6/CDKN2C/MCM7/CDKN2D/MNAT1/PSMA6/HMMR/HAUS1/CCNF/BUB1/HAUS8/HINFP/ANLN/PSMD10/KDM8/MCM10/KNTC1/CDK10/UBE2E2/CDC45/PSMD9/DBF4B/POLE2/HAUS5/APPL2/CDC27/RRM2/MAD2L1/RGCC/USP47/NDC80/CDT1/CACUL1/CUL3/CDK1/PCNA/BACH1/NEK6/ORC2/MCM6/MCM5/PSMA8/DYNC1LI1/FBXO5/CUL4A/PKMYT1/ZFYVE19/SIRT2/PLK1/KCNH5/CKS1B/MCM3/KLHL18/RPS6KB1/BUB3/NES/DLGAP5/ANAPC16/TMOD3/MCM2/CDK14/INHBA/PRMT2/TUBG1/FOX…
BP	GO:0030509	BMP signaling pathway	115	0.504872	1.27031	0.120805	0.643842	0.621258	1093	tags=14%, list=9%, signal=13%	LRP2/BMPER/FST/GREM2/ACVR2A/SMAD9/ROR2/MEGF8/FOXD1/NEO1/SULF1/TGFB2/NOTCH1/RGMA/GDF6/NOTCH2
BP	GO:2001252	positive regulation of chromosome organization	138	0.489771	1.26017	0.120879	0.643842	0.621258	1043	tags=10%, list=8%, signal=9%	GCG/ISL1/TRIM28/MAP2K7/PPP1R10/KMT2A/PPARGC1A/LRRK2/SPHK2/KMT2E/CCT2/RIF1/PRDM9/MAP3K4
BP	GO:0006703	estrogen biosynthetic process	10	-0.77074	-1.35644	0.120983	0.643842	0.621258	2039	tags=50%, list=16%, signal=42%	STAR/CYP19A1/HSD17B8/HSD3B1/HSD17B12
BP	GO:0035458	cellular response to interferon-beta	10	-0.769754	-1.3547	0.120983	0.643842	0.621258	1921	tags=30%, list=15%, signal=25%	HTRA2/TLR3/IRF1
CC	GO:0030055	cell-substrate junction	387	0.436698	1.20793	0.12114	0.643842	0.621258	1348	tags=22%, list=11%, signal=21%	TRPV4/TNS2/FAP/SHROOM4/FLRT3/RPLP0/FOCAD/RPS11/RPS19/RPS9/ACTB/RPS16/RPL13A/RPS13/RPL12/XIRP2/SPRY4/RPS2/VCL/PAK4/RPL23/RPS8/RPL31/RPS3/RPL7A/RPS14/RPL10A/RPL30/AVIL/NEXN/HSPB1/RPL8/RPS15/P4HB/ITGB5/RPL4/TLN2/FAT1/RPL9/RPL37A/ITGA2/FLNB/RPS7/DAB2/BCAR3/RPL3/RPS4X/TNS3/MPZL1/RPS17/ACTN2/LPP/ITGBL1/RPL6/SLC9A3R2/RPS5/CD44/RPLP1/SRC/RPS18/RPS3A/SVIL/HSPA8/ADAM9/PABPC1/L1CAM/SMPX/RPS10/RPL22/RPL7/RPS…
BP	GO:0043616	keratinocyte proliferation	33	0.61966	1.33638	0.121399	0.643842	0.621258	1316	tags=21%, list=10%, signal=19%	FST/AREG/FGFR2/FGF7/NOTCH2/CASK/PTCH1
BP	GO:0046165	alcohol biosynthetic process	131	-0.471718	-1.21269	0.121429	0.643842	0.621258	1931	tags=22%, list=15%, signal=19%	APOA1/IP6K2/CLCN2/SOD1/GBA/APOB/FGF1/IDI1/CYB5R3/DHCR7/PMVK/ACER2/QDPR/CYP51A1/SNCA/P2RY1/CYP3A4/MOXD1/DHDDS/PLEK/FASN/SREBF1/P2RY6/ASAH2/DHCR24/CYP27A1/APOE/SCD/APOA4
CC	GO:0005819	spindle	318	-0.421578	-1.18406	0.121528	0.643842	0.621258	2214	tags=21%, list=17%, signal=18%	TTL/HAUS5/CDC27/MISP/KIF15/EMD/EML4/CCSAP/ARL8B/MAP9/MAD2L1/TTC28/KATNAL1/CUL3/CDK1/CENPV/NEK6/DYNC1LI1/FBXO5/RAB11FIP4/SIRT2/PLK1/KIF11/MAP10/TERF1/AUNIP/DLGAP5/MTCL1/KIF23/NUDCD2/POC1A/TUBG1/TMEM9/STAG1/CDC6/CKAP2L/ARHGEF2/SPICE1/HAUS4/KIF2C/MAPRE3/TPX2/TADA3/NUMA1/RGS14/CEP170/MAK/RB1/CTTN/CKAP2/PLK4/SKA3/UNC119/AURKA/AURKB/CDC20/CEP162/VPS4A/NUSAP1/NEK2/PRC1/MAD2L1BP/SPAG8/STX1B/MAEA/CCNB1/TB…
BP	GO:0015931	nucleobase-containing compound transport	205	0.455648	1.22149	0.121681	0.643842	0.621258	2026	tags=19%, list=16%, signal=16%	IGF2BP1/IGF2BP2/NUP210/YTHDC1/SLC35D1/SMG7/SEH1L/RPS15/ABCC4/NUP205/LRPPRC/SLC28A3/IGF2BP3/QKI/UPF1/SLC25A25/SMG1/DHX9/SLC25A24/KHDRBS1/DDX19B/SUPT6H/RBM15B/HSF1/THOC2/TOMM20/MCM3AP/NUP214/RANBP2/SETD2/SLC25A5/ZC3H3/NUP153/RFTN2/FYTTD1/ZFP36L1/EIF6/FIP1L1
BP	GO:0062014	negative regulation of small molecule metabolic process	67	0.536664	1.26928	0.121739	0.643842	0.621258	983	tags=19%, list=8%, signal=18%	INS/MALRD1/CYP27B1/FAM3C/ACACB/HDAC4/SCAP/PPARGC1A/GFI1/SIK1/NCOR1/PROX1/SOGA1
BP	GO:0110149	regulation of biomineralization	71	-0.538053	-1.27184	0.121951	0.643842	0.621258	962	tags=15%, list=8%, signal=14%	DDR2/ADGRV1/TGFB3/ANKH/ATP2B1/CCR1/UCMA/SGMS2/TMEM119/NELL1/CCL3
BP	GO:0035904	aorta development	47	0.588716	1.30186	0.122172	0.643842	0.621258	1304	tags=21%, list=10%, signal=19%	LRP2/MYLK/TBX2/TGFB2/NOTCH1/PDE2A/PROX1/ADAMTS9/CHD7/PLXND1
BP	GO:0001709	cell fate determination	32	0.621207	1.33231	0.1222	0.643842	0.621258	2075	tags=41%, list=16%, signal=34%	WNT7A/ISL1/TBX2/ATOH1/PROX1/DSCAML1/NOTCH2/PTCH1/MYOD1/NKX2-2/EBF2/KLF4/BMP4
BP	GO:0010389	regulation of G2/M transition of mitotic cell cycle	176	-0.456925	-1.20515	0.122222	0.643842	0.621258	1181	tags=13%, list=9%, signal=12%	TUBG1/BRSK1/CDC6/CDK2/HAUS4/TPX2/PSMB6/DONSON/PLK4/AURKA/AURKB/CENPJ/CCNB3/VPS4A/ORC1/NEK2/PRKAR2B/PSMB9/PSMB7/GPR132/PSME2/PSMB8/CCNB1
CC	GO:0030864	cortical actin cytoskeleton	62	0.555406	1.29362	0.122222	0.643842	0.621258	1338	tags=21%, list=11%, signal=19%	TRPV4/SHROOM4/KNCN/MYADM/AKAP13/MLPH/SHROOM2/WASL/ACTN2/RDX/SPTBN1/UTRN/PLS1
MF	GO:0004252	serine-type endopeptidase activity	86	0.531049	1.28827	0.122271	0.643842	0.621258	580	tags=10%, list=5%, signal=10%	PCSK2/PCSK1/TMPRSS15/FAP/KLK15/RHBDL1/MMP9/HGF/TMPRSS11D
MF	GO:0035035	histone acetyltransferase binding	24	0.666613	1.36153	0.12253	0.643842	0.621258	1181	tags=21%, list=9%, signal=19%	PAX6/CREB1/HIF1A/ETS1/ZBTB7A
MF	GO:0015485	cholesterol binding	38	-0.614238	-1.31035	0.122605	0.643842	0.621258	44	tags=21%, list=0%, signal=21%	STAR/GRAMD1C/APOA1/GRAMD1B/NPC2/STARD3/OSBP2/APOA4
BP	GO:0015849	organic acid transport	247	0.459115	1.2513	0.122768	0.643842	0.621258	1410	tags=18%, list=11%, signal=16%	NMB/FOLR2/LRP2/ACSL5/RGS2/SLC6A19/HRH3/SLC22A2/SLC10A2/SLC7A1/SLC7A3/SLC10A1/SLCO1C1/SLC16A1/ACACB/SLC12A2/SLC26A6/STRA6/NR0B2/ABCD2/SLC22A6/CROT/NCOA2/NCOA1/SLC26A5/SLC38A3/SLC47A1/SFXN4/PLA2R1/SLC5A6/CPT1A/ABCC1/SLC25A15/PRKAG2/FABP1/UMOD/LRRC8E/OC90/ACE/SLC23A1/PLA2G4A/SLC32A1/SLC25A12/ACSL1
BP	GO:0010559	regulation of glycoprotein biosynthetic process	29	-0.643568	-1.33032	0.122772	0.643842	0.621258	2546	tags=34%, list=20%, signal=28%	ACOT8/NCSTN/ITM2B/ITM2C/RAMP1/ACER2/PXYLP1/CHP1/TMEM59/CCR7
MF	GO:0016799	hydrolase activity, hydrolyzing N-glycosyl compounds	29	-0.644813	-1.33289	0.122772	0.643842	0.621258	575	tags=21%, list=5%, signal=20%	CD38/UNG/IL1RL1/TLR1/MUTYH/SARM1
BP	GO:0000305	response to oxygen radical	21	-0.675828	-1.33776	0.122807	0.643842	0.621258	745	tags=29%, list=6%, signal=27%	SOD2/GLRX2/SOD1/NFE2L2/FANCC/APOA4
MF	GO:0042379	chemokine receptor binding	21	-0.676746	-1.33958	0.122807	0.643842	0.621258	2432	tags=57%, list=19%, signal=46%	CNIH4/CXCL14/CXCL6/CXCL5/CCL20/S100A14/NES/CXCL8/CXCL2/CKLF/CXCL10/CCL3
BP	GO:0045198	establishment of epithelial cell apical/basal polarity	12	-0.746584	-1.35209	0.122841	0.643842	0.621258	2034	tags=42%, list=16%, signal=35%	RHOA/MSN/SLC9A3R1/WNT5A/SH3BP1
BP	GO:0090128	regulation of synapse maturation	12	-0.747261	-1.35331	0.122841	0.643842	0.621258	1347	tags=50%, list=11%, signal=45%	DAB2IP/NRXN1/CAMK2B/CDC20/CLSTN1/NEUROD2
MF	GO:0004675	transmembrane receptor protein serine/threonine kinase activity	13	0.742687	1.37714	0.122984	0.643842	0.621258	309	tags=15%, list=2%, signal=15%	TGFBR1/ACVR2A
BP	GO:0015980	energy derivation by oxidation of organic compounds	215	0.45201	1.21942	0.123043	0.643842	0.621258	1449	tags=11%, list=11%, signal=10%	INS/STK40/COQ10B/PHKA2/PPARGC1A/PASK/ACO2/MRAP2/NR1D1/NR4A3/MYC/HIF1A/UQCRC1/SLC25A25/PRKAG2/INSR/PRLH/DYRK2/NDUFB6/KL/SLC25A12/SIRT3/GNAS
BP	GO:0032602	chemokine production	62	-0.556507	-1.29641	0.123188	0.643842	0.621258	781	tags=26%, list=6%, signal=24%	TLR3/SIRPA/TIRAP/SNAI2/HAVCR2/WNT5A/IL1RL1/C1QTNF3/IL17F/TLR7/SIGIRR/ADCYAP1/SYK/TLR9/AIF1/CSF1R
BP	GO:0032642	regulation of chemokine production	62	-0.556507	-1.29641	0.123188	0.643842	0.621258	781	tags=26%, list=6%, signal=24%	TLR3/SIRPA/TIRAP/SNAI2/HAVCR2/WNT5A/IL1RL1/C1QTNF3/IL17F/TLR7/SIGIRR/ADCYAP1/SYK/TLR9/AIF1/CSF1R
BP	GO:0061013	regulation of mRNA catabolic process	176	0.456664	1.20402	0.123377	0.643842	0.621258	1049	tags=10%, list=8%, signal=10%	PABPC4/IGF2BP1/IGF2BP2/RPS27A/FASTKD5/CSDC2/NBAS/HSPB1/RBM24/AXIN2/FUS/UBA52/IGF2BP3/HSPA8/PABPC1/UPF1/PKP3/MOV10
BP	GO:0032925	regulation of activin receptor signaling pathway	19	0.698998	1.35455	0.123482	0.643842	0.621258	992	tags=21%, list=8%, signal=19%	FST/ACVR2A/MAGI2/NOMO1
BP	GO:0042596	fear response	35	-0.617592	-1.30175	0.123552	0.643842	0.621258	855	tags=26%, list=7%, signal=24%	RPS6KB1/SLC1A1/CRH/ADRB1/GRIK2/ADCYAP1/NEUROD2/ADRA2A/APOE
BP	GO:0030500	regulation of bone mineralization	59	-0.563359	-1.30555	0.123656	0.643842	0.621258	962	tags=17%, list=8%, signal=16%	DDR2/ADGRV1/TGFB3/ANKH/ATP2B1/CCR1/SGMS2/TMEM119/NELL1/CCL3
BP	GO:0050868	negative regulation of T cell activation	69	-0.53558	-1.25992	0.123845	0.643842	0.621258	1060	tags=20%, list=8%, signal=19%	DUSP3/LOXL3/SMAD7/CRTAM/NRARP/HAVCR2/HLA-G/TIGIT/RUNX3/IRF1/LRRC32/TWSG1/CD274/RUNX1
BP	GO:0048844	artery morphogenesis	55	0.56868	1.29788	0.123874	0.643842	0.621258	1116	tags=24%, list=9%, signal=22%	LRP2/TGFBR1/HAND2/MYLK/TBX2/STRA6/WNT11/ZMIZ1/TGFB2/NOTCH1/PROX1/ADAMTS9/CHD7
BP	GO:0044786	cell cycle DNA replication	61	-0.552943	-1.28702	0.123878	0.643842	0.621258	2954	tags=49%, list=23%, signal=38%	POLA1/POLA2/POLE/RFC2/MCM7/CDC45/DBF4B/POLE2/LIG1/POLD3/CDT1/PCNA/RFC3/MCM6/MCM5/POLD1/FBXO5/RFC5/RAD51/MCM3/BRCA2/TERF1/TIPIN/MCM2/BCL6/PRIM2/MCM4/E2F8/E2F7/DONSON
BP	GO:0042461	photoreceptor cell development	36	0.607644	1.32692	0.123967	0.643842	0.621258	1356	tags=28%, list=11%, signal=25%	RP1L1/TH/FSCN2/PDE6C/RDH13/CRB1/DIO3/DCX/USH1C/MFRP
BP	GO:0044030	regulation of DNA methylation	20	-0.670461	-1.32182	0.124031	0.643842	0.621258	141	tags=15%, list=1%, signal=15%	GRHL2/MIS18A/SPI1
BP	GO:0045620	negative regulation of lymphocyte differentiation	33	-0.621533	-1.29992	0.124031	0.643842	0.621258	1278	tags=27%, list=10%, signal=25%	BCL6/INHBA/LOXL3/SMAD7/NRARP/RUNX3/IRF1/PGLYRP2/RUNX1
MF	GO:0030506	ankyrin binding	18	-0.684101	-1.32136	0.12426	0.643842	0.621258	1029	tags=39%, list=8%, signal=36%	SLC8A1/ATP1A1/RHCG/OBSCN/RHAG/PTPRC/SLC4A1
BP	GO:2000516	positive regulation of CD4-positive, alpha-beta T cell activation	18	-0.689829	-1.33242	0.12426	0.643842	0.621258	1358	tags=28%, list=11%, signal=25%	PRKCQ/CD55/MYB/SASH3/NCKAP1L
BP	GO:0071361	cellular response to ethanol	13	-0.730769	-1.32619	0.124506	0.643842	0.621258	73	tags=46%, list=1%, signal=46%	TP53INP1/CYBB/GLRA1/SOD2/SLC23A2/SPI1
BP	GO:0097186	amelogenesis	13	-0.728255	-1.32162	0.124506	0.643842	0.621258	1331	tags=38%, list=10%, signal=34%	PPARA/STIM1/SLC24A4/PERP/CSF3R
BP	GO:0007351	tripartite regional subdivision	10	0.758302	1.33768	0.124736	0.643842	0.621258	24	tags=10%, list=0%, signal=10%	FZD5
MF	GO:0008331	high voltage-gated calcium channel activity	10	0.757922	1.33701	0.124736	0.643842	0.621258	736	tags=30%, list=6%, signal=28%	CACNA1C/CACNA1B/CACNB1
BP	GO:0008595	anterior/posterior axis specification, embryo	10	0.758302	1.33768	0.124736	0.643842	0.621258	24	tags=10%, list=0%, signal=10%	FZD5
BP	GO:0010958	regulation of amino acid import across plasma membrane	10	0.761059	1.34254	0.124736	0.643842	0.621258	50	tags=10%, list=0%, signal=10%	RGS2
BP	GO:0032352	positive regulation of hormone metabolic process	10	0.76069	1.34189	0.124736	0.643842	0.621258	1041	tags=30%, list=8%, signal=28%	SLCO1C1/PPARGC1A/HIF1A
BP	GO:0061052	negative regulation of cell growth involved in cardiac muscle cell development	10	0.758541	1.3381	0.124736	0.643842	0.621258	671	tags=20%, list=5%, signal=19%	RGS2/CTDP1
BP	GO:1903789	regulation of amino acid transmembrane transport	10	0.761059	1.34254	0.124736	0.643842	0.621258	50	tags=10%, list=0%, signal=10%	RGS2
BP	GO:1904851	positive regulation of establishment of protein localization to telomere	10	0.761496	1.34331	0.124736	0.643842	0.621258	2717	tags=60%, list=21%, signal=47%	CCT2/CCT8/TCP1/CCT3/CCT4/CCT7
BP	GO:0051000	positive regulation of nitric-oxide synthase activity	21	0.696808	1.35701	0.124744	0.643842	0.621258	5	tags=5%, list=0%, signal=5%	INS
BP	GO:0048247	lymphocyte chemotaxis	29	-0.643337	-1.32984	0.124752	0.643842	0.621258	881	tags=31%, list=7%, signal=29%	GPR183/ADAM8/CKLF/WNT5A/PIK3CD/CXCL10/SAA1/CXCR3/CCL3
BP	GO:0030431	sleep	21	-0.671278	-1.32875	0.124756	0.643842	0.621258	855	tags=24%, list=7%, signal=22%	CRH/DRD2/ADRB1/ADA/SLC29A1
BP	GO:0110150	negative regulation of biomineralization	21	-0.671441	-1.32908	0.124756	0.643842	0.621258	473	tags=19%, list=4%, signal=18%	ECM1/CCR1/UCMA/CCL3
BP	GO:0051255	spindle midzone assembly	10	-0.766473	-1.34893	0.124764	0.643842	0.621258	1530	tags=50%, list=12%, signal=44%	MAP10/KIF23/MLH1/AURKB/PRC1
BP	GO:0070278	extracellular matrix constituent secretion	10	-0.767013	-1.34988	0.124764	0.643842	0.621258	908	tags=30%, list=7%, signal=28%	CPB2/ADTRP/TNFRSF1B
BP	GO:0007093	mitotic cell cycle checkpoint	131	-0.47095	-1.21072	0.125	0.643842	0.621258	2064	tags=23%, list=16%, signal=19%	MDC1/MAD2L1/RGCC/NDC80/CDT1/PRCC/CDK1/PCNA/DYNC1LI1/ZFYVE19/PLK1/BUB3/TIPIN/BRSK1/E2F1/CDC6/CDK2/FANCD2/E2F8/E2F7/DONSON/ZWILCH/AURKA/AURKB/CDC20/VPS4A/ORC1/MAD2L1BP/GEN1/CCNB1
BP	GO:0034341	response to interferon-gamma	112	-0.490852	-1.22684	0.125	0.643842	0.621258	1694	tags=28%, list=13%, signal=24%	STX8/CASP1/VIM/PDE12/RPS6KB1/MEFV/ACTR2/ICAM1/TLR3/CITED1/NCAM1/GSN/CAMK2B/SIRPA/CIITA/SNCA/HLA-A/WNT5A/MED1/B2M/HLA-G/HLA-DPA1/FCGR1A/IRF1/WAS/FASLG/ASS1/HLA-DPB1/AIF1/IRF8/CCL3
BP	GO:0051180	vitamin transport	30	0.628612	1.33294	0.125	0.643842	0.621258	993	tags=23%, list=8%, signal=22%	AMN/FOLR2/LRP2/STRA6/SLC52A3/SLC5A6/ABCC1
BP	GO:0002115	store-operated calcium entry	14	-0.725342	-1.32769	0.125737	0.645389	0.622751	2136	tags=50%, list=17%, signal=42%	ORAI2/CASQ1/ORAI1/STIM1/EFHB/HOMER2/CD84
BP	GO:0007549	dosage compensation	14	0.714543	1.33706	0.125761	0.645389	0.622751	3273	tags=50%, list=26%, signal=37%	YTHDC1/UPF1/RBM15B/PCGF3/PCGF5/METTL3/PRDM14
BP	GO:0009048	dosage compensation by inactivation of X chromosome	14	0.714543	1.33706	0.125761	0.645389	0.622751	3273	tags=50%, list=26%, signal=37%	YTHDC1/UPF1/RBM15B/PCGF3/PCGF5/METTL3/PRDM14
MF	GO:0030547	receptor inhibitor activity	14	0.716078	1.33993	0.125761	0.645389	0.622751	731	tags=14%, list=6%, signal=13%	FST/LYPD6
BP	GO:1905146	lysosomal protein catabolic process	14	0.717431	1.34246	0.125761	0.645389	0.622751	536	tags=21%, list=4%, signal=21%	LRP2/LDLR/VPS13A
MF	GO:0031406	carboxylic acid binding	128	0.493237	1.25084	0.125858	0.645389	0.622751	382	tags=9%, list=3%, signal=9%	FOLR2/DDAH1/DDC/P3H1/TM4SF5/TH/FTCDNL1/CYP2W1/P4HA3/PC/FABP2/ACACB
BP	GO:1901800	positive regulation of proteasomal protein catabolic process	83	-0.521264	-1.25952	0.125912	0.645389	0.622751	1771	tags=23%, list=14%, signal=20%	GBA/NFE2L2/SIRT2/PLK1/CSNK1A1/BBS7/DAB2IP/BCAP31/SMAD7/CEBPA/PRICKLE1/ATXN3/FBXW8/AURKA/RNF19B/DET1/CDC20/RNF14/CLU
MF	GO:0003777	microtubule motor activity	54	0.564203	1.28523	0.126126	0.645587	0.622943	2223	tags=33%, list=17%, signal=28%	DYNC2H1/STARD9/KIF19/KIFC3/KIF16B/KIF1B/DNAH10/KIFC1/KIF6/KIF3B/DNAH5/KIF21A/KIF13A/KIF13B/DNAH2/KIF27/DYNC1H1/KIF26B
BP	GO:0008277	regulation of G protein-coupled receptor signaling pathway	115	-0.49424	-1.23828	0.126126	0.645587	0.622943	883	tags=23%, list=7%, signal=21%	ARRDC3/STMN1/RAMP1/PHF24/C3/EDN1/RAMP2/CNGB1/RGS9/CXCL8/FRMPD1/SNCA/RGS14/PLEK/RGS3/DRD2/GRK7/RGS1/HOMER2/NMT1/RGS18/ADCYAP1/ADA/AIPL1/METAP2/ABHD6
BP	GO:0006925	inflammatory cell apoptotic process	16	-0.706494	-1.32788	0.126253	0.645786	0.623135	939	tags=25%, list=7%, signal=23%	CTSL/HCAR2/PIK3CD/FASLG
BP	GO:0007250	activation of NF-kappaB-inducing kinase activity	13	-0.727605	-1.32044	0.126482	0.646218	0.623551	1228	tags=38%, list=10%, signal=35%	TRAF4/TLR3/TIRAP/CARD14/TRAF2
MF	GO:0008252	nucleotidase activity	10	-0.765349	-1.34695	0.126654	0.646218	0.623551	1307	tags=30%, list=10%, signal=27%	NT5C3A/NT5C2/BPNT1
BP	GO:1905907	negative regulation of amyloid fibril formation	11	-0.757806	-1.36279	0.126894	0.646218	0.623551	643	tags=36%, list=5%, signal=35%	IAPP/CRYAB/CLU/APOE
CC	GO:0060205	cytoplasmic vesicle lumen	251	0.458592	1.24763	0.126984	0.646218	0.623551	922	tags=7%, list=7%, signal=7%	GCG/INS/PCSK1/AOC1/QPCT/PLAC8/FAM3C/SCG3/VCL/HGF/VPS13A/HSP90AB1/ACTN2/LRRC7/TGFB2/CCT2/CSTB/HSPA8
BP	GO:0046321	positive regulation of fatty acid oxidation	13	0.737066	1.36671	0.127016	0.646218	0.623551	1082	tags=38%, list=9%, signal=35%	ABCD2/PPARGC1A/NR4A3/CPT1A/FABP1
BP	GO:0060445	branching involved in salivary gland morphogenesis	18	0.704229	1.35209	0.127273	0.646218	0.623551	1304	tags=33%, list=10%, signal=30%	FGFR2/HGF/SEMA3C/LAMA5/FGF7/PLXND1
BP	GO:0097150	neuronal stem cell population maintenance	18	0.704409	1.35244	0.127273	0.646218	0.623551	959	tags=28%, list=8%, signal=26%	IGF2BP1/PCM1/NOTCH1/PROX1/SOX2
BP	GO:0048489	synaptic vesicle transport	39	-0.603807	-1.29766	0.12758	0.646218	0.623551	1580	tags=31%, list=12%, signal=27%	KIF5C/DTNBP1/SNAPIN/SNAP91/KIF5A/BLOC1S3/BLOC1S2/AP3M2/BORCS5/TOR1A/CNIH2/MAP2
BP	GO:0061577	calcium ion transmembrane transport via high voltage-gated calcium channel	14	0.710102	1.32875	0.127789	0.646218	0.623551	736	tags=14%, list=6%, signal=13%	CACNA1C/CACNB1
BP	GO:0060065	uterus development	17	0.702448	1.34319	0.128514	0.646218	0.623551	1065	tags=29%, list=8%, signal=27%	WNT7A/STRA6/TGFB2/SRC/ASH1L
BP	GO:0014068	positive regulation of phosphatidylinositol 3-kinase signaling	74	0.526998	1.25935	0.12854	0.646218	0.623551	1610	tags=19%, list=13%, signal=17%	INS/ROR2/HGF/TGFB2/PLXNB1/PRR5/SRC/INSR/PDGFRA/FLT1/KDR/IGF1R/ERBB4/FYN
BP	GO:0045730	respiratory burst	23	0.674668	1.34701	0.128571	0.646218	0.623551	295	tags=9%, list=2%, signal=9%	INS/RPS19
BP	GO:0002523	leukocyte migration involved in inflammatory response	12	-0.740984	-1.34195	0.128599	0.646218	0.623551	2184	tags=50%, list=17%, signal=41%	FFAR2/LBP/FUT7/ADAM8/SLAMF8/ITGB2
BP	GO:0010523	negative regulation of calcium ion transport into cytosol	12	-0.740137	-1.34041	0.128599	0.646218	0.623551	3251	tags=67%, list=26%, signal=50%	CALM3/TRDN/NTSR1/CLIC2/EPO/CASQ2/TMBIM6/FKBP1B
CC	GO:0036038	MKS complex	12	-0.744433	-1.34819	0.128599	0.646218	0.623551	1493	tags=50%, list=12%, signal=44%	MKS1/AHI1/TMEM216/TMEM107/B9D2/TCTN2
BP	GO:0043487	regulation of RNA stability	166	0.469478	1.22926	0.128603	0.646218	0.623551	1049	tags=10%, list=8%, signal=9%	PABPC4/IGF2BP1/IGF2BP2/RPS27A/FASTKD5/CSDC2/HSPB1/RBM24/AXIN2/FUS/UBA52/IGF2BP3/HSPA8/PABPC1/UPF1/MOV10
MF	GO:0016229	steroid dehydrogenase activity	21	-0.669041	-1.32433	0.128655	0.646218	0.623551	2139	tags=48%, list=17%, signal=40%	HSD17B4/NSDHL/RDH16/SRD5A3/SRD5A1/HSD17B8/HSD3B1/HSD17B3/AKR1D1/HSD17B12
CC	GO:0030672	synaptic vesicle membrane	88	-0.511835	-1.24903	0.128857	0.646218	0.623551	1792	tags=26%, list=14%, signal=23%	SYNGR1/SYN2/RAB11B/SVOP/DTNBP1/RAB35/GAD2/LAMP1/SNAPIN/LAMP5/DOC2A/SYNPR/PRRT2/SYN1/DRD2/BORCS5/TMEM163/SLC18A1/PTPRS/SYPL1/PTPRN2/SLC17A7/SLC18A2
CC	GO:0099501	exocytic vesicle membrane	88	-0.511835	-1.24903	0.128857	0.646218	0.623551	1792	tags=26%, list=14%, signal=23%	SYNGR1/SYN2/RAB11B/SVOP/DTNBP1/RAB35/GAD2/LAMP1/SNAPIN/LAMP5/DOC2A/SYNPR/PRRT2/SYN1/DRD2/BORCS5/TMEM163/SLC18A1/PTPRS/SYPL1/PTPRN2/SLC17A7/SLC18A2
BP	GO:0071466	cellular response to xenobiotic stimulus	62	0.548898	1.27847	0.128889	0.646218	0.623551	215	tags=10%, list=2%, signal=10%	AOC1/DPEP1/AS3MT/AADAC/CYP1B1/CYP2W1
BP	GO:0051668	localization within membrane	68	-0.533195	-1.25643	0.128913	0.646218	0.623551	1811	tags=24%, list=14%, signal=20%	GLRB/NRXN2/CACNG3/ITGAL/DOCK2/PIGR/DLG2/NRXN1/GSN/CDH13/CD2/GRIK2/PTPRC/CNIH2/ITGB2/APOE
BP	GO:0071107	response to parathyroid hormone	10	0.756011	1.33363	0.128964	0.646218	0.623551	654	tags=30%, list=5%, signal=28%	PHEX/HDAC4/ITGA2
BP	GO:1902749	regulation of cell cycle G2/M phase transition	186	-0.44423	-1.18274	0.129326	0.646218	0.623551	1809	tags=17%, list=14%, signal=15%	PSMA8/FBXO5/ZFYVE19/PLK1/KCNH5/BABAM1/ATF5/NEK10/TUBG1/BRSK1/CDC6/CDK2/HAUS4/TPX2/PSMB6/DONSON/PLK4/AURKA/AURKB/CENPJ/CCNB3/VPS4A/ORC1/NEK2/PRKAR2B/PSMB9/PSMB7/GPR132/PSME2/PSMB8/CCNB1
MF	GO:0016709	oxidoreductase activity, acting on paired donors, with incorporation or reduction of molecular oxygen, NAD(P)H as one donor, and incorporation of one atom of oxygen	26	-0.649529	-1.30108	0.129363	0.646218	0.623551	1395	tags=31%, list=11%, signal=27%	CYP46A1/MTRR/CYP51A1/CYP3A4/AKR1D1/CYP1A1/CYP27A1/FMO5
BP	GO:0032608	interferon-beta production	41	-0.595897	-1.29294	0.129456	0.646218	0.623551	1453	tags=22%, list=11%, signal=20%	NLRX1/TLR3/SIRPA/TBK1/TIRAP/TLR7/PTPRS/IRF1/TLR9
BP	GO:0032648	regulation of interferon-beta production	41	-0.595897	-1.29294	0.129456	0.646218	0.623551	1453	tags=22%, list=11%, signal=20%	NLRX1/TLR3/SIRPA/TBK1/TIRAP/TLR7/PTPRS/IRF1/TLR9
BP	GO:0003401	axis elongation	25	0.659791	1.35707	0.129482	0.646218	0.623551	633	tags=28%, list=5%, signal=27%	FGFR2/TRIM28/LRP6/MAGI2/NKD1/WNT11/SIX4
BP	GO:1905906	regulation of amyloid fibril formation	14	-0.720701	-1.31919	0.129666	0.646218	0.623551	643	tags=29%, list=5%, signal=27%	IAPP/CRYAB/CLU/APOE
MF	GO:0140097	catalytic activity, acting on DNA	170	-0.456617	-1.20024	0.129799	0.646218	0.623551	1901	tags=17%, list=15%, signal=15%	PCNA/RFC3/MCM6/MCM5/POLD1/RFC5/DNASE1/RBBP8/RAD51/MCM3/TERF1/CHRAC1/MCM2/ERCC6L/RAD54L/POLQ/DFFB/MCM4/UNG/DNTT/DMC1/DNASE2/MGMT/TERT/WRNIP1/FTO/MUTYH/GEN1/DCLRE1A
CC	GO:0098576	lumenal side of membrane	19	-0.67033	-1.30994	0.129921	0.646218	0.623551	1084	tags=42%, list=9%, signal=39%	CTSA/SPPL2A/BCAP31/HLA-A/HLA-G/HLA-DPA1/BDH1/HLA-DPB1
MF	GO:0001085	RNA polymerase II transcription factor binding	41	0.599255	1.32379	0.130064	0.646218	0.623551	592	tags=7%, list=5%, signal=7%	ELK1/HDAC4/CREBBP
BP	GO:0098657	import into cell	178	0.453055	1.19465	0.130152	0.646218	0.623551	659	tags=11%, list=5%, signal=10%	TRPV4/FOLR2/LRP2/ACSL5/RGS2/GLUL/SLC15A1/SLC22A2/SLC39A8/SLC7A1/SLC7A3/CACNG5/SLC8A3/ACTB/SLC2A5/SLC12A2/WNK1/SLC39A14/KCNJ8
BP	GO:0071548	response to dexamethasone	38	-0.603329	-1.28708	0.130268	0.646218	0.623551	2039	tags=39%, list=16%, signal=33%	STAR/SRD5A1/PCNA/EDN1/GBA/CFLAR/EPO/RPS6KB1/ICAM1/AQP1/CRH/FIBIN/DDIT4/FBXO32/ASS1
BP	GO:0071326	cellular response to monosaccharide stimulus	103	0.511013	1.26597	0.130337	0.646218	0.623551	588	tags=10%, list=5%, signal=9%	GCG/CFTR/PDX1/TH/RFX6/NEUROD1/SLC2A5/SLC26A6/PPARGC1A/SLC39A14
BP	GO:0071331	cellular response to hexose stimulus	103	0.511013	1.26597	0.130337	0.646218	0.623551	588	tags=10%, list=5%, signal=9%	GCG/CFTR/PDX1/TH/RFX6/NEUROD1/SLC2A5/SLC26A6/PPARGC1A/SLC39A14
BP	GO:0007265	Ras protein signal transduction	287	-0.425238	-1.18296	0.130357	0.646218	0.623551	1958	tags=20%, list=15%, signal=17%	CUL3/APOA1/RHOG/MAPKAPK5/RFXANK/STMN1/RASAL1/KSR2/RAP1B/CBL/RAPGEF3/EPO/RASGRF2/RHOB/EPS8L3/CYFIP1/RAB35/SHTN1/DAB2IP/ARHGEF3/RTN4R/BCL6/KRAS/IQSEC3/FOXM1/ELMO1/RERG/MAPK11/CDK2/ARHGEF2/CADM4/F2RL2/GPR174/RAB15/ROBO1/CDH13/RB1/RAB30/PDPN/RAC2/RAP2C/RASGRP1/RHOH/VAV1/CCNA2/P2RY8/CYTH4/NET1/WAS/ADRA2A/PSD3/SH3BP1/CSF1/EPOR/AIF1/APOE/GPR18
BP	GO:0045088	regulation of innate immune response	213	-0.437772	-1.18534	0.130357	0.646218	0.623551	881	tags=14%, list=7%, signal=13%	ADAM8/TBK1/CRTAM/PSMB6/HLA-A/SLAMF8/TIRAP/DRD2/HAVCR2/WNT5A/SH2D1A/MED1/HLA-G/RASGRP1/SLAMF6/VAV1/PSMB9/PSMB7/A2M/IRF1/SYK/PSME2/SERPING1/PSMB8/CLEC10A/SH2D1B/APOE/CLNK/CLEC4D
BP	GO:0050832	defense response to fungus	10	-0.76197	-1.341	0.130435	0.646218	0.623551	997	tags=20%, list=8%, signal=18%	JAGN1/HAMP
BP	GO:0051955	regulation of amino acid transport	27	0.651565	1.36262	0.130435	0.646218	0.623551	687	tags=15%, list=5%, signal=14%	RGS2/HRH3/SLC12A2/SLC38A3
BP	GO:0045851	pH reduction	45	-0.580991	-1.28101	0.130515	0.646218	0.623551	2049	tags=36%, list=16%, signal=30%	ATP6V0E1/ATP6V1B2/ATP6V1C1/CLIC4/RAB7A/CLN5/ATP6AP1/ATP6V1H/SNAPIN/TMEM9/CCDC115/GRN/SLC9A7/SLAMF8/CA2/FASLG
BP	GO:0070098	chemokine-mediated signaling pathway	45	-0.579325	-1.27734	0.130515	0.646218	0.623551	1248	tags=40%, list=10%, signal=36%	CXCL6/THPO/CXCL5/CCL20/EDN1/CIB1/CXCR4/CXCL8/CCR4/CXCL2/CMKLR1/ROBO1/XCR1/CCR1/CXCL10/CXCR3/CCR7/CCL3
MF	GO:0140312	cargo adaptor activity	15	0.705784	1.33394	0.130522	0.646218	0.623551	2120	tags=40%, list=17%, signal=33%	HIP1/DAB2/AP2A2/LDLRAP1/AP2B1/AP1G1
BP	GO:0048562	embryonic organ morphogenesis	233	0.4429	1.20071	0.130631	0.646218	0.623551	1502	tags=16%, list=12%, signal=15%	FZD5/TGFBR1/HAND2/TH/RYR2/FGFR2/STIL/GLI1/LRP6/NEUROD1/FOXI1/TBX2/ROR2/SLC44A4/STRA6/MEGF8/C2CD3/VANGL2/WNT11/SIX4/SOBP/ATOH1/NOTCH1/PROX1/COL2A1/DSCAML1/HIF1A/NOTCH2/CHD7/PDGFRA/USH1G/USH1C/PLS1/HAND1/SMO/GNAS/FUZ/TBX22
MF	GO:0000979	RNA polymerase II core promoter sequence-specific DNA binding	11	0.754416	1.34475	0.130802	0.646218	0.623551	435	tags=9%, list=3%, signal=9%	TBPL1
BP	GO:1904869	regulation of protein localization to Cajal body	11	0.75431	1.34456	0.130802	0.646218	0.623551	2717	tags=55%, list=21%, signal=43%	CCT2/CCT8/TCP1/CCT3/CCT4/CCT7
BP	GO:1904871	positive regulation of protein localization to Cajal body	11	0.75431	1.34456	0.130802	0.646218	0.623551	2717	tags=55%, list=21%, signal=43%	CCT2/CCT8/TCP1/CCT3/CCT4/CCT7
BP	GO:0032623	interleukin-2 production	43	-0.590976	-1.29071	0.130841	0.646218	0.623551	667	tags=19%, list=5%, signal=18%	HAVCR2/TRAF2/IL17F/HOMER2/PTPRC/SASH3/CD3E/RUNX1
BP	GO:0032722	positive regulation of chemokine production	43	-0.59092	-1.29059	0.130841	0.646218	0.623551	781	tags=26%, list=6%, signal=24%	TIRAP/HAVCR2/WNT5A/IL1RL1/IL17F/TLR7/ADCYAP1/SYK/TLR9/AIF1/CSF1R
MF	GO:0140318	protein transporter activity	21	0.692404	1.34844	0.130879	0.646218	0.623551	1568	tags=19%, list=12%, signal=17%	LRP2/SEC61A1/IGF1R/TOMM20
BP	GO:0033631	cell-cell adhesion mediated by integrin	15	-0.711664	-1.32659	0.130952	0.646218	0.623551	670	tags=33%, list=5%, signal=32%	NPNT/SWAP70/SKAP1/ADA/CD3E
BP	GO:1903020	positive regulation of glycoprotein metabolic process	17	-0.688942	-1.3201	0.130952	0.646218	0.623551	2031	tags=35%, list=16%, signal=30%	NCSTN/RAB1A/RAMP1/PXYLP1/CHP1/CCR7
BP	GO:1903405	protein localization to nuclear body	12	0.742301	1.34632	0.130977	0.646218	0.623551	2717	tags=50%, list=21%, signal=39%	CCT2/CCT8/TCP1/CCT3/CCT4/CCT7
BP	GO:1904867	protein localization to Cajal body	12	0.742301	1.34632	0.130977	0.646218	0.623551	2717	tags=50%, list=21%, signal=39%	CCT2/CCT8/TCP1/CCT3/CCT4/CCT7
BP	GO:0001654	eye development	296	0.445133	1.23184	0.131111	0.646447	0.623772	1262	tags=17%, list=10%, signal=15%	TBC1D32/FZD5/RP1L1/PAX6/LAMC3/WNT7A/CACNA1C/SDK2/TGFBR1/FREM2/TH/CYP1B1/MAF/FSCN2/LRP6/NEUROD1/MEIS2/TGIF2/TBX2/WNT9A/STRA6/NKD1/PTF1A/SHROOM2/BCAR3/PDE6C/CDON/COL8A1/TGFB2/RDH13/PROX1/MEIS1/RPL24/SOX2/IGFN1/CRB1/HIF1A/ADAMTS18/SLC25A25/NOTCH2/PDE6A/CHD7/PDGFRA/DIO3/ATP2B4/FLT1/PBX3/DCX/CRYBA2
BP	GO:0002088	lens development in camera-type eye	65	0.539582	1.26496	0.131403	0.647022	0.624327	888	tags=14%, list=7%, signal=13%	TBC1D32/WNT7A/TGFBR1/MAF/SHROOM2/BCAR3/CDON/PROX1/MEIS1
BP	GO:0043414	macromolecule methylation	243	0.458317	1.24546	0.131403	0.647022	0.624327	1745	tags=14%, list=14%, signal=12%	GCG/HENMT1/MOV10L1/TRIM28/SIRT7/ASZ1/KMT2C/SETD1A/KMT2A/CREBBP/PPM1D/GFI1/THADA/KMT2E/MTO1/RIF1/PRDM9/DYDC1/MYC/ASH1L/MRM1/EHMT1/TDRD9/GNAS/SUPT6H/RBM15B/PRDM4/PRDM5/NSD1/PRMT3/TDRD5/OGT/SETD2
BP	GO:0007507	heart development	458	0.427183	1.20572	0.131519	0.647044	0.624348	1140	tags=15%, list=9%, signal=14%	TBC1D32/LRP2/RGS2/ADAMTS1/DYNC2H1/CACNA1C/FLRT3/TGFBR1/HAND2/DSP/ISL1/SLIT2/FREM2/TH/MYBPC3/RYR2/CRELD1/FGFR2/STIL/GLI1/ADGRG6/FOXJ1/LRP6/CSRP3/XIRP2/PLN/ACACB/TBX2/STRA6/MEGF8/AKAP13/TNNC1/NEB/ASXL1/RBM24/C2CD3/VANGL2/WNT11/NEBL/KCNJ8/CTDP1/TIE1/PDLIM4/ADIPOR2/AXIN2/KCNK2/SEMA3C/SIK1/MMP21/ZMIZ1/ACTN2/CREB1/TGFB2/NOTCH1/PDE2A/PROX1/MEIS1/COL2A1/LDB3/ADAMTS9/PRKAR1A/CXADR/HIF1A/INSR/NOTCH2/ZFPM1/…
BP	GO:0048668	collateral sprouting	20	-0.659934	-1.30106	0.131783	0.647044	0.624348	647	tags=15%, list=5%, signal=14%	BDNF/PTPRS/RND2
BP	GO:0032259	methylation	284	0.448053	1.23534	0.131818	0.647044	0.624348	1745	tags=15%, list=14%, signal=13%	GCG/HENMT1/MOV10L1/AS3MT/TRIM28/SIRT7/ASZ1/KMT2C/SETD1A/KMT2A/ECE2/PRDM11/CREBBP/PPM1D/GFI1/THADA/KMT2E/PRDM15/MTO1/RIF1/PRDM9/DYDC1/MYC/ASH1L/HNMT/MRM1/PRDM1/EHMT1/TDRD9/GNAS/SUPT6H/RBM15B/AHCY/METTL24/MAT2A/PRDM6/PRDM4/PRDM5/NSD1/PRMT3/TDRD5/OGT/SETD2
MF	GO:0035615	clathrin adaptor activity	14	0.707681	1.32422	0.131846	0.647044	0.624348	2120	tags=43%, list=17%, signal=36%	HIP1/DAB2/AP2A2/LDLRAP1/AP2B1/AP1G1
BP	GO:2000136	regulation of cell proliferation involved in heart morphogenesis	14	0.706001	1.32107	0.131846	0.647044	0.624348	860	tags=21%, list=7%, signal=20%	HAND2/ISL1/NOTCH1
BP	GO:0042176	regulation of protein catabolic process	317	-0.41733	-1.17105	0.131944	0.647098	0.6244	931	tags=11%, list=7%, signal=11%	AGAP2/SMAD7/CYP51A1/C4BPA/SNCA/ADAM8/CEBPA/CCDC22/PRICKLE1/ATXN3/FBXW8/WNT5A/MYLIP/VPS35/AURKA/RNF19B/DET1/CTSC/CDC20/NSF/VPS11/PBK/RNF14/NEDD4L/PKD1/CLU/BAG5/ANXA2/ADRA2A/PSME2/TNFSF12/NELL1/APOE/TNFRSF1B/HAMP/GRIN2C
BP	GO:0051341	regulation of oxidoreductase activity	80	0.527622	1.26985	0.132035	0.64711	0.624412	776	tags=10%, list=6%, signal=9%	INS/DDAH1/CYP27B1/SZT2/ACVR2A/GFI1/SPHK2/WASL
BP	GO:0032418	lysosome localization	60	-0.551191	-1.27925	0.132246	0.647377	0.62467	1300	tags=28%, list=10%, signal=26%	RAB3A/ARL8B/S100A13/CBL/VPS33A/SNAPIN/TMEM106B/VPS33B/GATA2/BLOC1S2/RAC2/BORCS5/BLK/PIK3CD/SYK/CD84/CLNK
BP	GO:0045649	regulation of macrophage differentiation	16	-0.702471	-1.32032	0.132265	0.647377	0.62467	1273	tags=38%, list=10%, signal=34%	INHBA/GATA2/RB1/ZBTB46/CSF1/C1QC
CC	GO:0048786	presynaptic active zone	66	-0.531431	-1.25189	0.132727	0.64882	0.626063	1524	tags=23%, list=12%, signal=20%	ERC2/CNTNAP1/ADCY8/BRSK1/GPM6A/P2RY1/SYN1/PPFIA4/ATP2B1/GRM7/STX1B/STX2/PCLO/RIMS4/SLC17A7
BP	GO:0071496	cellular response to external stimulus	240	0.45167	1.23024	0.133038	0.64882	0.626063	1076	tags=13%, list=8%, signal=12%	AOC1/FOLR2/CYP24A1/ATF3/CLEC16A/MIOS/CYP27B1/GCN1/SZT2/EIF2AK3/PHEX/HMOX1/HDAC4/NUAK1/SEH1L/NCOA1/PPM1D/WNT11/LRRK2/ITGA2/SLC38A3/SIK1/RPTOR/PDE2A/PIEZO2/HSPA8/EIF2S1/INHBB/ULK1/CPEB4/PRKAG2
BP	GO:0006570	tyrosine metabolic process	12	0.740504	1.34306	0.133056	0.64882	0.626063	725	tags=25%, list=6%, signal=24%	TH/FAH/HPD
BP	GO:1904816	positive regulation of protein localization to chromosome, telomeric region	12	0.736677	1.33611	0.133056	0.64882	0.626063	2717	tags=50%, list=21%, signal=39%	CCT2/CCT8/TCP1/CCT3/CCT4/CCT7
BP	GO:2000758	positive regulation of peptidyl-lysine acetylation	30	0.621981	1.31888	0.133065	0.64882	0.626063	2654	tags=30%, list=21%, signal=24%	ISL1/PPARGC1A/SPHK2/DIP2B/PRKAA2/AUTS2/IL1B/WBP2/TADA2B
MF	GO:0050661	NADP binding	44	-0.581552	-1.2755	0.133087	0.64882	0.626063	2297	tags=25%, list=18%, signal=21%	CRYZ/G6PD/SRD5A1/TP53I3/PGD/ME1/MTRR/DHCR7/DECR1/QDPR/FMO5
BP	GO:0086019	cell-cell signaling involved in cardiac conduction	26	0.643587	1.34967	0.133981	0.652746	0.629851	1358	tags=19%, list=11%, signal=17%	CACNA1C/RYR2/KCNQ1/CXADR/SCN3B
BP	GO:0030502	negative regulation of bone mineralization	12	-0.738607	-1.33764	0.134357	0.653434	0.630514	473	tags=25%, list=4%, signal=24%	ECM1/CCR1/CCL3
BP	GO:0098581	detection of external biotic stimulus	12	-0.73886	-1.3381	0.134357	0.653434	0.630514	2050	tags=50%, list=16%, signal=42%	LBP/C4B/PGLYRP1/HLA-A/TLR1/PGLYRP2
MF	GO:1990939	ATP-dependent microtubule motor activity	27	0.643604	1.34598	0.134387	0.653434	0.630514	1425	tags=30%, list=11%, signal=26%	DYNC2H1/KIF19/KIFC3/KIF16B/KIF1B/DNAH10/KIF3B/DNAH5
BP	GO:0032409	regulation of transporter activity	218	0.445483	1.20375	0.134529	0.653693	0.630764	1373	tags=16%, list=11%, signal=14%	INS/PDZK1/CFTR/RYR2/CACNG5/RRAD/MMP9/ACTB/KCNE1B/PLN/KCTD7/KMT2A/WNK1/PPARGC1A/ANK3/THADA/KCNC2/SPHK2/CACNB1/ACTN2/LRRC7/HECW2/GNB5/GRIA1/MINK1/KLHL24/PHB2/GSG1L/FGF14/UTRN/OPRM1/HTT/SCN3B/PTPN3
CC	GO:0031983	vesicle lumen	253	0.456068	1.24061	0.134703	0.654108	0.631165	922	tags=7%, list=7%, signal=7%	GCG/INS/PCSK1/AOC1/QPCT/PLAC8/FAM3C/SCG3/VCL/HGF/VPS13A/HSP90AB1/ACTN2/LRRC7/TGFB2/CCT2/CSTB/HSPA8
BP	GO:0010560	positive regulation of glycoprotein biosynthetic process	15	-0.70872	-1.32111	0.134921	0.654646	0.631684	1108	tags=33%, list=9%, signal=30%	NCSTN/RAMP1/PXYLP1/CHP1/CCR7
MF	GO:0019208	phosphatase regulator activity	79	0.524871	1.26531	0.135076	0.654646	0.631684	2150	tags=24%, list=17%, signal=20%	PPP2R3A/PPP1R16A/PPP1R10/SBF2/PPP1R14A/PPP2R2B/PPP1R14B/ZEB2/PHACTR2/BMP2K/RCAN3/PPP1R16B/MGAT5/LGALS3/SBF1/BOD1L1/PPP2R5D/PPP1R35/PPP1R15B
BP	GO:0002228	natural killer cell mediated immunity	34	-0.615348	-1.28339	0.135294	0.654646	0.631684	845	tags=32%, list=7%, signal=30%	CRTAM/HLA-A/HAVCR2/SH2D1A/RNF19B/HLA-G/RASGRP1/SLAMF6/VAV1/SH2D1B/CLNK
BP	GO:0015816	glycine transport	10	0.754228	1.33049	0.135307	0.654646	0.631684	50	tags=10%, list=0%, signal=10%	RGS2
CC	GO:0030128	clathrin coat of endocytic vesicle	10	0.753482	1.32917	0.135307	0.654646	0.631684	1990	tags=50%, list=16%, signal=42%	SGIP1/AP2A2/EPN2/PICALM/AP2B1
BP	GO:0061383	trabecula morphogenesis	38	0.598047	1.31903	0.135417	0.654646	0.631684	1758	tags=29%, list=14%, signal=25%	ADAMTS1/TGFBR1/ADGRG6/PPARGC1B/TGFB2/NOTCH1/PLXNB1/CHD7/GREM1/FBN2/SRF
BP	GO:0048880	sensory system development	305	0.443845	1.22131	0.135514	0.654646	0.631684	1262	tags=17%, list=10%, signal=16%	TBC1D32/FZD5/RP1L1/PAX6/LAMC3/WNT7A/CACNA1C/SDK2/TGFBR1/ISL1/FREM2/TH/CYP1B1/MAF/FSCN2/LRP6/NEUROD1/MEIS2/TGIF2/TBX2/WNT9A/SLC44A4/STRA6/NKD1/PTF1A/SHROOM2/BCAR3/PDE6C/CDON/COL8A1/TGFB2/RDH13/PROX1/MEIS1/RPL24/SOX2/IGFN1/CRB1/PHOX2B/HIF1A/ADAMTS18/SLC25A25/NOTCH2/PDE6A/CHD7/PDGFRA/DIO3/ATP2B4/FLT1/PBX3/DCX/CRYBA2
BP	GO:0036296	response to increased oxygen levels	26	-0.647335	-1.29669	0.135524	0.654646	0.631684	3549	tags=50%, list=28%, signal=36%	TMEM199/PDGFRB/POLG/COL1A1/ATP6V0D1/HDAC2/FAS/EPO/ATP6AP1/ATG7/CCDC115/PDPN/CYP1A1
BP	GO:0002762	negative regulation of myeloid leukocyte differentiation	31	-0.629494	-1.307	0.135827	0.655682	0.632683	1460	tags=32%, list=11%, signal=29%	CUL4A/GPR68/INHBA/TLR3/MAFB/GATA2/ZBTB46/INPP5D/C1QC/CCL3
BP	GO:0097061	dendritic spine organization	72	0.521996	1.24227	0.136069	0.655689	0.63269	213	tags=6%, list=2%, signal=5%	INS/WNT7A/EPHB1/CAPRIN2
BP	GO:0002675	positive regulation of acute inflammatory response	18	-0.677463	-1.30854	0.136095	0.655689	0.63269	2334	tags=44%, list=18%, signal=36%	TNF/FFAR2/PTGER3/CNR1/C3/IL6ST/ADAM8/CCR7
BP	GO:0009074	aromatic amino acid family catabolic process	18	-0.677905	-1.30939	0.136095	0.655689	0.63269	1072	tags=28%, list=8%, signal=25%	QDPR/ACMSD/IDO2/ASRGL1/IL4I1
BP	GO:0098930	axonal transport	55	-0.564844	-1.29177	0.136201	0.655771	0.63277	1580	tags=24%, list=12%, signal=21%	KIF5C/DTNBP1/SNAPIN/DLG2/KIF5A/NEFL/BLOC1S3/BLOC1S2/AP3M2/BORCS5/CNIH2/MAP2/MGARP
BP	GO:0006766	vitamin metabolic process	102	0.50512	1.24977	0.136465	0.656189	0.633173	993	tags=12%, list=8%, signal=11%	AMN/FOLR2/LRP2/CYP24A1/CYP27B1/CYP2W1/PC/GFI1/RBP2/SLC52A3/SLC5A6/ABCC1
BP	GO:0036473	cell death in response to oxidative stress	64	0.538804	1.25827	0.136465	0.656189	0.633173	708	tags=14%, list=6%, signal=13%	INS/CYP1B1/PDK1/HGF/HSPB1/P4HB/TBC1D24/LRRK2/IL10
BP	GO:0070167	regulation of biomineral tissue development	69	-0.527579	-1.2411	0.136784	0.657292	0.634237	962	tags=14%, list=8%, signal=13%	DDR2/ADGRV1/TGFB3/ANKH/ATP2B1/CCR1/SGMS2/TMEM119/NELL1/CCL3
MF	GO:0004715	non-membrane spanning protein tyrosine kinase activity	39	-0.596244	-1.28141	0.136961	0.657714	0.634644	1142	tags=20%, list=9%, signal=18%	CSK/TEC/TEC/BLK/ZAP70/SYK/ITK/MELK
MF	GO:0042043	neurexin family protein binding	12	0.733232	1.32987	0.137214	0.658017	0.634937	78	tags=8%, list=1%, signal=8%	SYTL2
BP	GO:0001906	cell killing	81	-0.516028	-1.23942	0.137291	0.658017	0.634937	1324	tags=25%, list=10%, signal=22%	LAMP1/TUSC2/ICAM1/MR1/CD55/CRTAM/HLA-A/HAVCR2/SH2D1A/B2M/RNF19B/HLA-G/CTSC/RASGRP1/SLAMF6/VAV1/PTPRC/SYK/LYZ/HAMP
BP	GO:2000134	negative regulation of G1/S transition of mitotic cell cycle	81	-0.517628	-1.24326	0.137291	0.658017	0.634937	1196	tags=27%, list=9%, signal=25%	TRIAP1/ZNF385A/RFWD3/FHL1/GTSE1/TFDP1/CDK6/CDKN2C/CDKN2D/RGCC/CDK1/PCNA/PRMT2/E2F1/CDK2/E2F8/E2F7/RB1/AURKA/GFI1B/MYO16/CCNB1
BP	GO:0006090	pyruvate metabolic process	126	0.4837	1.22233	0.137615	0.659109	0.63599	1181	tags=15%, list=9%, signal=14%	INS/PGAM2/NUP210/PC/SLC16A1/PDK1/HDAC4/SEH1L/PGK1/PPARGC1A/NUP205/LDHB/NCOR1/NR4A3/HIF1A/PRKAG2/INSR/PGAM1/ZBTB7A
BP	GO:0048592	eye morphogenesis	120	0.483117	1.21565	0.137698	0.659109	0.63599	1356	tags=22%, list=11%, signal=20%	FZD5/PAX6/SDK2/TH/FSCN2/LRP6/TBX2/WNT9A/STRA6/NKD1/PTF1A/SHROOM2/BCAR3/PDE6C/CDON/COL8A1/RDH13/PROX1/MEIS1/IGFN1/CRB1/HIF1A/NOTCH2/DIO3/USH1C/MFRP
MF	GO:0016670	oxidoreductase activity, acting on a sulfur group of donors, oxygen as acceptor	11	-0.750501	-1.34966	0.138258	0.66136	0.638163	1872	tags=55%, list=15%, signal=47%	PCYOX1L/QSOX1/TMX3/PCYOX1/SUMF1/SELENBP1
BP	GO:0006026	aminoglycan catabolic process	53	-0.565464	-1.28231	0.138489	0.662039	0.638818	1089	tags=30%, list=9%, signal=28%	ARSB/SGSH/SPAM1/HEXB/SLC9A1/CSPG5/CHP1/HYAL3/PRELP/LYG2/HPSE2/IDS/GLB1/PGLYRP2/NCAN/HSPG2
BP	GO:0051304	chromosome separation	84	-0.512892	-1.24221	0.138686	0.662552	0.639312	2717	tags=35%, list=21%, signal=27%	MOS/LCMT1/PCID2/TOP2A/DIS3L2/BUB1/KNTC1/CDC27/SMARCAD1/MAD2L1/NDC80/CDT1/CUL3/NEK6/DYNC1LI1/FBXO5/PLK1/BUB3/DLGAP5/CDC6/MLH1/UBE2C/NUMA1/RB1/AURKB/CDC20/MAD2L1BP/GEN1/CCNB1
BP	GO:0032663	regulation of interleukin-2 production	41	-0.591802	-1.28405	0.138837	0.662842	0.639593	667	tags=20%, list=5%, signal=19%	HAVCR2/TRAF2/IL17F/HOMER2/PTPRC/SASH3/CD3E/RUNX1
BP	GO:1900542	regulation of purine nucleotide metabolic process	94	0.513925	1.25786	0.139073	0.66354	0.640266	1181	tags=17%, list=9%, signal=16%	INS/GUCA2A/NUP210/PDK1/HDAC4/SEH1L/PPARGC1A/NUP205/SPHK2/NCOR1/GUCA1B/HIF1A/PRKAG2/INSR/PGAM1/ZBTB7A
BP	GO:0035459	vesicle cargo loading	16	0.696951	1.32593	0.139165	0.663551	0.640276	1841	tags=25%, list=14%, signal=21%	SCAP/SEC24D/KIF13A/PICALM
MF	GO:0015645	fatty acid ligase activity	12	0.732586	1.3287	0.139293	0.663733	0.640452	1786	tags=33%, list=14%, signal=29%	ACSL5/ACSBG2/ACSL1/SLC27A4
BP	GO:0006906	vesicle fusion	88	-0.504395	-1.23088	0.139746	0.665461	0.642119	2162	tags=27%, list=17%, signal=23%	VPS8/RAB3A/VPS41/TAP1/VPS18/VAMP3/VAV3/STX8/RAB7A/CAV2/TAP2/VTI1A/SNAPIN/CPLX1/SNCA/PRRT2/CHP1/TMEM175/SNAP25/VPS4A/VPS11/STX1B/STX2/ANXA2
BP	GO:0098656	anion transmembrane transport	423	0.426227	1.1964	0.139908	0.665805	0.642451	1081	tags=12%, list=9%, signal=12%	INS/SLC14A1/FOLR2/LRP2/CFTR/ACSL5/RGS2/SLC6A19/SLC5A10/SLC15A1/SLC22A2/SLC39A8/TTYH1/SLC7A1/SLC7A3/SLC13A1/DISP1/SLC35D1/GABRR3/SLC2A5/SLC16A1/ACACB/SLC12A2/SLC26A6/SLC44A4/CLIP3/SLC20A2/STRA6/ADAMTS8/SLC5A11/ABCD2/SLC22A6/ABCC4/SLC26A5/SLC38A3/ADIPOR2/SLC4A10/SLC47A1/SLC28A3/SLC12A3/SLC4A3/GABRA4/SLC5A6/HSPA8/NR4A3/CPT1A/PEX6/ABCC1/SLC25A15/ANO1/PRKAG2/INSR
BP	GO:0006957	complement activation, alternative pathway	12	-0.728387	-1.31913	0.140115	0.66636	0.642986	1989	tags=58%, list=16%, signal=49%	C8B/CFH/C3/C8A/C7/CFB/CFP
BP	GO:0022898	regulation of transmembrane transporter activity	209	0.444549	1.19296	0.140312	0.666865	0.643474	1373	tags=15%, list=11%, signal=14%	INS/PDZK1/CFTR/RYR2/CACNG5/RRAD/MMP9/ACTB/KCNE1B/PLN/WNK1/PPARGC1A/ANK3/THADA/KCNC2/SPHK2/CACNB1/ACTN2/LRRC7/HECW2/GNB5/GRIA1/MINK1/KLHL24/PHB2/GSG1L/FGF14/UTRN/OPRM1/HTT/SCN3B/PTPN3
BP	GO:0043266	regulation of potassium ion transport	80	-0.511956	-1.23035	0.140741	0.668473	0.645026	1653	tags=21%, list=13%, signal=19%	CASQ2/KCNIP1/WNK4/ANK2/AMIGO1/KCNAB2/LRRC52/CD63/KCNIP3/DRD2/KEL/KCNIP2/NEDD4L/NETO2/ADCYAP1/ADRA2A/KCNJ2
BP	GO:0010035	response to inorganic substance	405	-0.402681	-1.15021	0.14087	0.668646	0.645192	1902	tags=21%, list=15%, signal=19%	CASR/PCNA/S100A13/SMPD3/RASAL1/SOD1/EDN1/ZFAND1/APOB/CFLAR/SHH/ALG2/NFE2L2/CPNE4/RAD51/CASQ2/CYBRD1/SLC38A2/SLC8A1/RHOB/NCF1/ATG7/FGG/GPX1/GPR37L1/NDRG1/TNFRSF11B/SLC1A1/STIM1/DLG2/ADCY8/ICAM1/KHK/GSN/THBS1/NEFL/SIRPA/FKBP1B/QDPR/PKLR/CDK2/ADGRV1/AQP1/CBX8/SNCA/CEBPA/PCGF2/SIGMAR1/DMTN/FANCC/DRD2/MIEN1/FIBIN/WNT5A/CRYAB/CNGA3/B2M/SYT3/TERT/TRAF2/CYP1A1/MYB/KCNIP2/NEDD4L/CCNA2/TXN/SLC30A4/CUTA/NET…
BP	GO:1902373	negative regulation of mRNA catabolic process	44	0.586502	1.29316	0.140998	0.668646	0.645192	1742	tags=25%, list=14%, signal=22%	IGF2BP1/NBAS/RBM24/AXIN2/FUS/PABPC1/PKP3/DHX9/ANGEL2/NOCT/CIRBP
BP	GO:1902930	regulation of alcohol biosynthetic process	65	-0.529716	-1.24834	0.141049	0.668646	0.645192	1866	tags=25%, list=15%, signal=21%	CLCN2/SOD1/APOB/FGF1/IDI1/DHCR7/PMVK/CYP51A1/SNCA/P2RY1/PLEK/FASN/SREBF1/P2RY6/APOE/SCD
BP	GO:0034377	plasma lipoprotein particle assembly	22	-0.65623	-1.30706	0.141199	0.668929	0.645466	52	tags=14%, list=0%, signal=14%	LCAT/APOE/APOA4
BP	GO:0005976	polysaccharide metabolic process	90	0.519602	1.25874	0.141593	0.6695	0.646017	1200	tags=11%, list=9%, signal=10%	INS/CHIA/STK40/HAS3/PHKA2/PASK/NR1D1/PRKAG2/INSR/DYRK2
BP	GO:0043161	proteasome-mediated ubiquitin-dependent protein catabolic process	360	-0.408453	-1.15917	0.141638	0.6695	0.646017	2014	tags=17%, list=16%, signal=15%	OS9/UCHL1/SGTB/CUL3/TAF9/CDK1/PSMA8/GBA/FBXO5/UBE2H/SHH/EDEM3/SPOPL/CUL4A/NFE2L2/SIRT2/PLK1/GID8/CSNK1A1/BBS7/BUB3/RNF5/ANAPC16/DNAJB14/AUP1/JKAMP/TMUB2/FBXL16/BCAP31/FBXL22/RNF103/CDK2/SPSB4/SMAD7/UBE2C/CEBPA/PSMB6/PRICKLE1/ATXN3/FBXO9/FBXW8/FBXO4/RBCK1/AURKA/RNF19B/AURKB/TRIM13/DET1/CDC20/FBXL15/PBK/RNF14/NEDD4L/PSMB9/PSMB7/CLU/BAG5/MAEA/PSME2/PSMB8/CCNB1
BP	GO:0036499	PERK-mediated unfolded protein response	19	0.691549	1.34012	0.1417	0.6695	0.646017	935	tags=26%, list=7%, signal=24%	ATF3/IGFBP1/EIF2AK3/DDIT3/EIF2S1
BP	GO:0061458	reproductive system development	326	0.439803	1.20685	0.141827	0.6695	0.646017	1257	tags=14%, list=10%, signal=13%	FZD5/LRP2/FST/ADAMTS1/WNT7A/TGFBR1/SLIT2/PLEKHA5/CYP27B1/FGFR2/CDX4/TRIM28/GLI1/LRP6/ACVR2A/ROR2/STRA6/CSDE1/PGR/RPS6/NCOA1/PCYT1B/SIX4/AGO4/IL10/NRIP1/HSP90AB1/SULF1/VGF/TGFB2/KDM5A/NOTCH1/SRC/ARID5B/INHBB/HIF1A/ASH1L/NOTCH2/CHD7/PDGFRA/JUNB/NR2F2/PTPRN/SLIT3/TPPP3
BP	GO:0034121	regulation of toll-like receptor signaling pathway	51	-0.566076	-1.28445	0.141831	0.6695	0.646017	1347	tags=22%, list=11%, signal=19%	DAB2IP/TLR3/TYRO3/FCRL3/TIRAP/CYBA/TLR1/PTPRS/IRF1/TLR9/SARM1
BP	GO:0048593	camera-type eye morphogenesis	98	0.511419	1.25368	0.141892	0.6695	0.646017	1190	tags=22%, list=9%, signal=21%	FZD5/PAX6/SDK2/TH/LRP6/TBX2/WNT9A/STRA6/PTF1A/SHROOM2/BCAR3/PDE6C/CDON/COL8A1/RDH13/PROX1/MEIS1/IGFN1/CRB1/HIF1A/NOTCH2/DIO3
MF	GO:0004303	estradiol 17-beta-dehydrogenase activity	11	-0.748544	-1.34614	0.142045	0.6695	0.646017	1163	tags=64%, list=9%, signal=58%	HSD17B7/RDH8/HSD17B6/HSD17B4/HSD17B8/HSD17B3/HSD17B12
BP	GO:0032957	inositol trisphosphate metabolic process	11	-0.747489	-1.34424	0.142045	0.6695	0.646017	879	tags=36%, list=7%, signal=34%	PTK2B/IPMK/P2RY1/P2RY6
BP	GO:0090092	regulation of transmembrane receptor protein serine/threonine kinase signaling pathway	192	0.444448	1.17991	0.142232	0.669772	0.646279	1223	tags=16%, list=10%, signal=14%	LRP2/BMPER/FST/TGFBR1/GREM2/RPS27A/ACVR2A/MAGI2/PEG10/BMP3/FOXD1/NEO1/KIAA0319/CREBBP/LATS2/ONECUT1/DAB2/HSP90AB1/SULF1/IL17RD/TGFB2/UBA52/NOTCH1/INHBB/NOMO1/GDF6/NOTCH2/CDKN1C/ZBTB7A/ADAM17
BP	GO:0090103	cochlea morphogenesis	16	-0.698642	-1.31313	0.142285	0.669772	0.646279	2439	tags=38%, list=19%, signal=30%	GLI2/FRZB/SIX1/DVL2/WNT5A/CTHRC1
BP	GO:0097009	energy homeostasis	32	0.605186	1.29795	0.142566	0.669924	0.646426	1471	tags=31%, list=12%, signal=28%	SGIP1/ACACB/PPARGC1A/PASK/MEX3C/MRAP2/NR4A3/METRNL/CRTC3/EIF4G1
MF	GO:0042056	chemoattractant activity	23	-0.646202	-1.29317	0.142578	0.669924	0.646426	653	tags=26%, list=5%, signal=25%	PDGFB/MIF/WNT5A/GDNF/CXCL10/CCL3
BP	GO:0033344	cholesterol efflux	39	-0.592193	-1.2727	0.142589	0.669924	0.646426	52	tags=21%, list=0%, signal=20%	APOA1/APOB/EEPD1/SHH/PLTP/NPC2/APOE/APOA4
BP	GO:0018210	peptidyl-threonine modification	105	0.494052	1.23101	0.142857	0.670756	0.647229	1200	tags=14%, list=9%, signal=13%	GCG/TGFBR1/CDC42BPA/GALNT3/MAP3K10/WNK1/LRRK2/MARK2/RPTOR/PARD3/ULK1/GALNT13/PRKAG2/UMOD/DYRK2
BP	GO:0006984	ER-nucleus signaling pathway	44	0.581274	1.28163	0.143167	0.671402	0.647852	935	tags=18%, list=7%, signal=17%	ATF3/IGFBP1/EIF2AK3/SCAP/DDIT3/ARHGEF10L/EIF2A/EIF2S1
MF	GO:0008236	serine-type peptidase activity	102	0.500993	1.23956	0.143177	0.671402	0.647852	270	tags=7%, list=2%, signal=7%	PCSK2/PCSK1/TMPRSS15/FAP/KLK15/RHBDL1/MMP9
BP	GO:0043201	response to leucine	10	0.742498	1.3098	0.143763	0.6728	0.649201	764	tags=30%, list=6%, signal=28%	PDX1/PPARGC1A/RPTOR
CC	GO:0005774	vacuolar membrane	343	-0.40986	-1.15611	0.14386	0.6728	0.649201	2124	tags=27%, list=17%, signal=23%	DRAM1/MFSD8/VPS41/ARL8B/NAPA/CTSA/DNAJC5/ITM2C/ATP6V1B2/SLC17A5/ATP6V1C1/LAMTOR2/VPS18/CTNS/SLC48A1/RAP1B/SYNGR1/TMEM192/GBA/SPPL2A/MCOLN3/STX8/RAB7A/CLN5/LAMTOR5/CYBRD1/RRAGA/MMD/SLC38A9/STARD3/VPS33A/LAPTM4A/CEACAM6/NEU1/LMBRD1/SIDT2/PSEN2/SLC46A3/LAMP1/ZFYVE26/ATP6V1H/SNAPIN/GNAI1/PIGR/TMEM106B/GNAQ/TLR3/LAMP5/SLC29A3/TM6SF1/TMEM9/GAA/CCDC115/RNF13/BRI3/VPS33B/SLC7A5/SLC36A1/GRN/CDIP1/B4GALT1/…
MF	GO:0001846	opsonin binding	11	-0.745611	-1.34086	0.143939	0.6728	0.649201	966	tags=27%, list=8%, signal=25%	CD93/CRP/ITGB2
BP	GO:1905475	regulation of protein localization to membrane	158	0.464194	1.20965	0.144124	0.6728	0.649201	1405	tags=11%, list=11%, signal=10%	INS/PDZK1/GDI1/ACTB/CSRP3/CLIP3/ANK3/PRKCH/DAB2/MRAP2/ZDHHC2/ATP2B4/GPC5/SPTBN1/IQSEC2/PLS1/CLTC/LDLRAP1
BP	GO:0002637	regulation of immunoglobulin production	40	-0.587415	-1.26754	0.144195	0.6728	0.649201	2394	tags=45%, list=19%, signal=37%	RBP4/HPX/TNF/EXOSC3/PKN1/NDFIP1/CD22/BCL6/TMBIM6/PARP3/MLH1/FCRL3/XBP1/TFRC/TRAF2/PTPRC/TLR9/SASH3
BP	GO:0060840	artery development	76	0.512357	1.23759	0.144397	0.6728	0.649201	1326	tags=21%, list=10%, signal=19%	LRP2/TGFBR1/HAND2/MYLK/TBX2/STRA6/WNT11/ZMIZ1/TGFB2/NOTCH1/PDE2A/PROX1/ADAMTS9/CHD7/PLXND1/HPGD
BP	GO:0009141	nucleoside triphosphate metabolic process	71	-0.52429	-1.23931	0.144465	0.6728	0.649201	1331	tags=13%, list=10%, signal=11%	PPARA/NUDT15/PKLR/NME3/AK5/VPS9D1/UCKL1/ADA/ENTPD3
BP	GO:0090022	regulation of neutrophil chemotaxis	23	-0.64463	-1.29003	0.144531	0.6728	0.649201	1248	tags=30%, list=10%, signal=27%	CXCL8/MOSPD2/TIRAP/RAC2/C5AR1/NCKAP1L/CCR7
BP	GO:0000288	nuclear-transcribed mRNA catabolic process, deadenylation-dependent decay	65	-0.526943	-1.2418	0.144665	0.6728	0.649201	1629	tags=8%, list=13%, signal=7%	DCPS/PDE12/DDX6/MLH1/NANOS2
BP	GO:0060021	roof of mouth development	80	0.520264	1.25214	0.145022	0.6728	0.649201	1131	tags=15%, list=9%, signal=14%	TBC1D32/WNT7A/TGFBR1/HAND2/LRP6/TBX2/WNT11/TGFB2/ARID5B/COL2A1/CHD7/PDGFRA
CC	GO:0001669	acrosomal vesicle	54	-0.552351	-1.25995	0.145161	0.6728	0.649201	1648	tags=24%, list=13%, signal=21%	CAV2/TRIM36/SPACA4/SNAPIN/SPAM1/HEXB/CFAP65/DRD2/HYAL3/GLIPR1L1/SPAG8/RND2/IL4I1
CC	GO:0098554	cytoplasmic side of endoplasmic reticulum membrane	13	0.716043	1.32773	0.145161	0.6728	0.649201	2125	tags=54%, list=17%, signal=45%	RPS26/THADA/RPS28/RPS29/RPL27/GNRH1/SPPL2B
BP	GO:0051656	establishment of organelle localization	368	-0.405036	-1.15122	0.145299	0.6728	0.649201	2416	tags=22%, list=19%, signal=19%	TMEM201/CTSZ/SNAP29/XPO1/EXOC4/TRAPPC4/BLOC1S5/PRKCZ/PIBF1/TTL/GORASP1/BLOC1S6/MISP/RAB3A/EML4/NAPA/TRAPPC6B/MAD2L1/RAB1A/NDC80/CD59/CDT1/TGFA/TRAPPC3/CUL3/S100A13/MYO1H/CBL/PLK1/RAB11B/STARD3/KIF5C/ATP6AP1/RAB17/DTNBP1/BBS7/DLGAP5/MYO1D/ACTR2/LAMP1/SNAPIN/SNAP91/ASIP/YKT6/KIF5A/NEFL/MLH1/BLOC1S3/SPICE1/KIF2C/NUMA1/CENPQ/GATA2/MYO5A/BBS5/BLOC1S2/NUF2/AP3M2/RAC2/SLC9A3R1/BORCS5/MCPH1/BLK/CHP1/WIPI…
BP	GO:1903955	positive regulation of protein targeting to mitochondrion	28	0.627255	1.31505	0.145418	0.6728	0.649201	24	tags=4%, list=0%, signal=4%	FZD5
CC	GO:0036064	ciliary basal body	123	0.475066	1.20249	0.145455	0.6728	0.649201	1394	tags=16%, list=11%, signal=15%	CCDC113/CEP250/KNCN/DZIP1/RTTN/EVC/CFAP157/PCM1/NEK4/C2CD3/AGBL4/CCDC170/TTLL4/DLG5/CAMSAP2/TTLL1/USH1G/PTPN23/GAS2L2/CEP78
CC	GO:0002080	acrosomal membrane	10	-0.749324	-1.31875	0.145558	0.6728	0.649201	1648	tags=40%, list=13%, signal=35%	CAV2/CFAP65/HYAL3/RND2
BP	GO:0019932	second-messenger-mediated signaling	241	-0.423901	-1.16122	0.145683	0.6728	0.649201	1303	tags=20%, list=10%, signal=18%	ANK2/GNAI1/PRKAR2A/CXCL8/PRKAR1B/SLC8A2/CCR4/THBS1/BCAP31/FKBP1B/PPP3R1/EFHB/AQP1/SLC9A1/CMKLR1/NPR2/CRH/CDH13/PLEK/DMTN/CHP1/SELP/PDE7A/XCR1/GRIN1/CCR1/HOMER2/GPR143/PRKAR2B/ZAP70/ADCYAP1/PTPRC/NEUROD2/ADA/SYK/TMEM38A/P2RY11/PCLO/CXCR3/DMD/CHP2/CD3E/MAFA/CCR7/CCL3/APOE/GRIN2C
BP	GO:0006140	regulation of nucleotide metabolic process	96	0.50517	1.24044	0.14574	0.6728	0.649201	1181	tags=17%, list=9%, signal=15%	INS/GUCA2A/NUP210/PDK1/HDAC4/SEH1L/PPARGC1A/NUP205/SPHK2/NCOR1/GUCA1B/HIF1A/PRKAG2/INSR/PGAM1/ZBTB7A
BP	GO:0043010	camera-type eye development	258	0.441775	1.20904	0.14574	0.6728	0.649201	1262	tags=16%, list=10%, signal=15%	TBC1D32/FZD5/RP1L1/PAX6/LAMC3/WNT7A/CACNA1C/SDK2/TGFBR1/TH/CYP1B1/MAF/LRP6/NEUROD1/TGIF2/TBX2/WNT9A/STRA6/PTF1A/SHROOM2/BCAR3/PDE6C/CDON/COL8A1/TGFB2/RDH13/PROX1/MEIS1/RPL24/IGFN1/CRB1/HIF1A/SLC25A25/NOTCH2/PDE6A/CHD7/PDGFRA/DIO3/ATP2B4/FLT1/DCX/CRYBA2
BP	GO:0062207	regulation of pattern recognition receptor signaling pathway	67	-0.525949	-1.23388	0.145756	0.6728	0.649201	1453	tags=21%, list=11%, signal=19%	NFKBIL1/NLRX1/DAB2IP/TLR3/TYRO3/FCRL3/TIRAP/CYBA/TLR1/SLC46A2/PTPRS/IRF1/TLR9/SARM1
BP	GO:0071474	cellular hyperosmotic response	11	-0.744737	-1.33929	0.145833	0.6728	0.649201	1724	tags=73%, list=14%, signal=63%	RCSD1/XRCC5/SLC2A1/EPO/EFHD1/ARHGEF2/MICU1/AQP1
BP	GO:0045117	azole transmembrane transport	10	0.741734	1.30845	0.145877	0.6728	0.649201	687	tags=30%, list=5%, signal=28%	SLC7A1/SLC44A4/SLC38A3
BP	GO:0051209	release of sequestered calcium ion into cytosol	84	-0.506322	-1.2263	0.145985	0.6728	0.649201	1757	tags=24%, list=14%, signal=21%	CASQ1/DHRS7C/MCOLN3/CASQ2/SLC8A1/ANK2/JPH3/JPH1/FKBP1B/SNCA/DRD2/XCR1/P2RY6/CXCL10/PTPRC/TMEM38A/FASLG/DMD/CCR7/CCL3
BP	GO:0051282	regulation of sequestering of calcium ion	84	-0.506322	-1.2263	0.145985	0.6728	0.649201	1757	tags=24%, list=14%, signal=21%	CASQ1/DHRS7C/MCOLN3/CASQ2/SLC8A1/ANK2/JPH3/JPH1/FKBP1B/SNCA/DRD2/XCR1/P2RY6/CXCL10/PTPRC/TMEM38A/FASLG/DMD/CCR7/CCL3
BP	GO:0051283	negative regulation of sequestering of calcium ion	84	-0.506322	-1.2263	0.145985	0.6728	0.649201	1757	tags=24%, list=14%, signal=21%	CASQ1/DHRS7C/MCOLN3/CASQ2/SLC8A1/ANK2/JPH3/JPH1/FKBP1B/SNCA/DRD2/XCR1/P2RY6/CXCL10/PTPRC/TMEM38A/FASLG/DMD/CCR7/CCL3
BP	GO:0051452	intracellular pH reduction	44	-0.573837	-1.25858	0.146026	0.6728	0.649201	2049	tags=34%, list=16%, signal=29%	ATP6V0E1/ATP6V1B2/ATP6V1C1/CLIC4/RAB7A/CLN5/ATP6V1H/SNAPIN/TMEM9/CCDC115/GRN/SLC9A7/SLAMF8/CA2/FASLG
BP	GO:0061351	neural precursor cell proliferation	117	0.474095	1.19383	0.146067	0.6728	0.649201	884	tags=15%, list=7%, signal=14%	IGF2BP1/LRP2/WNT7A/EPHB1/FGFR2/GLI1/SOX5/ZNF503/PCM1/LRRK2/NAP1L1/POU3F3/INSM1/CDON/DAGLA/NOTCH1/PROX1
BP	GO:1903421	regulation of synaptic vesicle recycling	21	-0.653974	-1.2945	0.146199	0.6728	0.649201	883	tags=24%, list=7%, signal=22%	CYFIP1/SNCA/TOR1A/STX1B/SLC17A7
CC	GO:0001650	fibrillar center	114	-0.484364	-1.21397	0.146209	0.6728	0.649201	480	tags=14%, list=4%, signal=14%	RAI14/IP6K2/THAP1/RPAIN/CDCA7L/TERF1/DUSP11/RGS22/RERG/SMAD7/TRERF1/POLR1E/PAX5/FAM111A/SELENBP1/DCLRE1A
MF	GO:0004713	protein tyrosine kinase activity	114	-0.484652	-1.21469	0.146209	0.6728	0.649201	1161	tags=15%, list=9%, signal=14%	TYRO3/CSK/DDR2/TEC/TEC/NRP2/HIPK4/BLK/FLT4/NTRK2/ZAP70/DYRK1B/SYK/ITK/MAP2K1/CSF1R/MELK
BP	GO:0032965	regulation of collagen biosynthetic process	29	-0.628206	-1.29856	0.146535	0.673535	0.64991	1053	tags=21%, list=8%, signal=19%	VIM/CIITA/CBX8/TGFB3/MYB/RUNX1
BP	GO:0003197	endocardial cushion development	36	0.589	1.28621	0.146694	0.673535	0.64991	860	tags=19%, list=7%, signal=18%	TGFBR1/ISL1/CRELD1/TBX2/RBM24/TGFB2/NOTCH1
BP	GO:0001556	oocyte maturation	15	-0.696245	-1.29785	0.146825	0.673535	0.64991	1769	tags=47%, list=14%, signal=40%	FBXO5/SIRT2/BRCA2/DMC1/NPR2/AURKA/CCNB1
MF	GO:0005123	death receptor binding	17	-0.677628	-1.29843	0.146825	0.673535	0.64991	2251	tags=29%, list=18%, signal=24%	EDA/CFLAR/DAB2IP/BDNF/FASLG
BP	GO:1905820	positive regulation of chromosome separation	17	-0.671234	-1.28617	0.146825	0.673535	0.64991	2196	tags=41%, list=17%, signal=34%	CDC27/CDT1/CUL3/DLGAP5/NUMA1/RB1/MAD2L1BP
BP	GO:0008299	isoprenoid biosynthetic process	22	-0.649014	-1.29269	0.147002	0.673668	0.650038	2483	tags=32%, list=20%, signal=26%	ALDH8A1/SRD5A3/BCO1/IDI1/PMVK/DHDDS/CYP1A1
BP	GO:0090596	sensory organ morphogenesis	203	0.440346	1.17708	0.147321	0.673668	0.650038	1356	tags=18%, list=11%, signal=17%	FZD5/PAX6/SDK2/TH/FGFR2/FSCN2/LRP6/FOXI1/TBX2/ROR2/WNT9A/SLC44A4/STRA6/NKD1/PTF1A/SIX4/SHROOM2/BCAR3/PDE6C/SOBP/CDON/ATOH1/COL8A1/RDH13/PROX1/MEIS1/COL2A1/IGFN1/CRB1/HIF1A/NOTCH2/CHD7/DIO3/USH1G/USH1C/PLS1/MFRP
CC	GO:0005721	pericentric heterochromatin	14	-0.709548	-1.29877	0.147348	0.673668	0.650038	1186	tags=43%, list=9%, signal=39%	CBX3/CBX5/ESCO2/HELLS/NCAPD3/IKZF1
BP	GO:0045023	G0 to G1 transition	38	-0.596476	-1.27245	0.14751	0.673668	0.650038	2069	tags=37%, list=16%, signal=31%	CBX5/TFDP1/RRM2/EED/RNF2/L3MBTL2/RBBP8/RAD51/DAB2IP/E2F1/RHNO1/PCGF2/MED1/HLA-G
BP	GO:0070316	regulation of G0 to G1 transition	38	-0.596476	-1.27245	0.14751	0.673668	0.650038	2069	tags=37%, list=16%, signal=31%	CBX5/TFDP1/RRM2/EED/RNF2/L3MBTL2/RBBP8/RAD51/DAB2IP/E2F1/RHNO1/PCGF2/MED1/HLA-G
BP	GO:0019883	antigen processing and presentation of endogenous antigen	11	-0.738886	-1.32877	0.147727	0.673668	0.650038	2092	tags=45%, list=16%, signal=38%	TAP1/TAP2/HLA-A/B2M/HLA-G
MF	GO:0050664	oxidoreductase activity, acting on NAD(P)H, oxygen as acceptor	12	-0.723618	-1.3105	0.147793	0.673668	0.650038	744	tags=25%, list=6%, signal=24%	NCF1/CYBA/FMO5
BP	GO:0034405	response to fluid shear stress	26	-0.639314	-1.28062	0.147844	0.673668	0.650038	922	tags=31%, list=7%, signal=29%	SMAD6/CITED2/NFE2L2/SMAD7/TGFB3/PKD1/CA2/ASS1
BP	GO:1903829	positive regulation of cellular protein localization	250	0.443003	1.20833	0.147982	0.673668	0.650038	1992	tags=17%, list=16%, signal=14%	INS/PDZK1/FZD5/CEP250/TRIM28/EIF2AK3/IPO5/CLIP3/ANK3/PRKCH/HSP90AB1/CCT2/SRC/GPSM2/RDX/ZDHHC2/ATP2B4/SPTBN1/CROCC/CCT8/PLS1/LRIG2/SMO/TCP1/SLC5A3/ERBB4/MAPT/EGFR/FYN/CCT3/LRP1/TCAF2/FBXW7/LGALS3/CCDC88A/C2CD5/RHOU/ZC3H12A/EPB41L2/EPB41/AP2B1/ABHD17C
BP	GO:0065005	protein-lipid complex assembly	25	-0.644211	-1.28927	0.148	0.673668	0.650038	52	tags=12%, list=0%, signal=12%	LCAT/APOE/APOA4
CC	GO:0005929	cilium	466	0.421811	1.19143	0.148064	0.673668	0.650038	1439	tags=17%, list=11%, signal=15%	TRPV4/TBC1D32/CERKL/CCDC113/RP1L1/DYNC2H1/CEP250/GPR19/KNCN/GLI1/DZIP1/KIF19/ENKD1/ABCA4/RTTN/FAM149B1/EVC/SLC26A6/GRK4/RSPH3/CFAP46/CFAP157/TTLL7/TTC23/ADCY3/VPS13A/HSPB11/PCM1/DNAL1/NEK4/C2CD3/CCDC181/SPATC1L/AGBL4/ODF2/EVC2/CCDC170/PDE6H/MNS1/NME8/TTLL4/DLG5/ABHD2/ALMS1/GUCA1B/PEX6/CRB1/DNAI1/PRKAR1A/HIF1A/CCDC63/ROPN1L/CAMSAP2/NOTCH2/PDE6A/UMOD/PDGFRA/NPY2R/TTLL1/CASK/DNAH10/ATP2B4/CROCC/VCAN…
BP	GO:0010453	regulation of cell fate commitment	20	0.681525	1.31563	0.148148	0.673668	0.650038	612	tags=15%, list=5%, signal=14%	NKX6-2/IL12B/WNT11
BP	GO:0002576	platelet degranulation	100	-0.488455	-1.21181	0.148214	0.673668	0.650038	2261	tags=34%, list=18%, signal=28%	F13A1/PLG/FERMT3/CD109/APOH/ENDOD1/ORM1/APOA1/PCYOX1L/NHLRC2/ITIH4/SOD1/KNG1/PDGFB/QSOX1/ITIH3/TMX3/FGG/ECM1/SCCPDH/THBS1/TGFB3/LAMP2/CD63/PLEK/DMTN/BLK/SELP/CLU/PSAP/A2M/SYK/SERPING1/ITGB3
MF	GO:0016866	intramolecular transferase activity	24	0.64873	1.325	0.148221	0.673668	0.650038	1170	tags=17%, list=9%, signal=15%	PGAM2/RPUSD2/PGAM1/PMM1
CC	GO:0005796	Golgi lumen	66	0.530447	1.2512	0.14823	0.673668	0.650038	138	tags=9%, list=1%, signal=9%	INS/MUC13/MUC5AC/WNT7A/LALBA/MUC3A
BP	GO:0055088	lipid homeostasis	103	0.498977	1.23616	0.148315	0.673668	0.650038	689	tags=9%, list=5%, signal=8%	INS/ANGPTL4/MALRD1/ENPP7/LDLR/SOAT2/PNPLA2/THADA/LIPG
MF	GO:0042887	amide transmembrane transporter activity	45	0.575237	1.27106	0.148472	0.673966	0.650326	993	tags=16%, list=8%, signal=14%	SLC14A1/SLC15A1/DISP1/SLC38A3/SLC47A1/SLC5A6/ABCC1
BP	GO:0010002	cardioblast differentiation	17	0.687967	1.3155	0.148594	0.674109	0.650464	1758	tags=41%, list=14%, signal=36%	ISL1/TBX2/TGFB2/NOTCH1/GREM1/NKX2-5/SRF
BP	GO:0090307	mitotic spindle assembly	54	-0.54915	-1.25265	0.148746	0.674211	0.650563	2249	tags=31%, list=18%, signal=26%	PIBF1/MISP/CCSAP/MAP9/RHOA/PLK1/KIF11/MAP10/KIF23/STAG1/SPICE1/TPX2/AURKB/CDC20/MYBL2/NEK2/PRC1
MF	GO:0008009	chemokine activity	15	-0.694306	-1.29424	0.14881	0.674211	0.650563	2332	tags=60%, list=18%, signal=49%	CXCL14/CXCL6/CXCL5/CCL20/CXCL8/CXCL2/CKLF/CXCL10/CCL3
BP	GO:0140467	integrated stress response signaling	23	0.661012	1.31975	0.14898	0.674211	0.650563	2150	tags=39%, list=17%, signal=33%	ATF3/IGFBP1/EIF2AK3/DDIT3/EIF2S1/IMPACT/PTPN2/EIF2AK4/PPP1R15B
BP	GO:0106027	neuron projection organization	81	0.511562	1.2377	0.149028	0.674211	0.650563	776	tags=9%, list=6%, signal=8%	INS/WNT7A/EPHB1/CAPRIN2/ABCD2/LRRK2/WASL
MF	GO:0072349	modified amino acid transmembrane transporter activity	20	-0.652875	-1.28715	0.149225	0.674211	0.650563	901	tags=30%, list=7%, signal=28%	CTNS/SLC46A1/SLC6A8/SLC22A5/SLC7A9/ABCC5
CC	GO:0000151	ubiquitin ligase complex	241	-0.423383	-1.1598	0.149281	0.674211	0.650563	2506	tags=20%, list=20%, signal=16%	CCNF/UBE2B/ASB12/CBLL1/FAM8A1/SHARPIN/STUB1/FBXO6/FBXO25/CDC27/GPR37/UBE2V1/OS9/USP47/CUL3/RNF2/UBE2D2/RNF11/KLHL2/SPOPL/CUL4A/CKS1B/GID8/ANAPC16/FBXO21/AUP1/MED20/FBXL16/FBXL22/SPSB4/UBE2C/CBX8/PCGF2/FBXO9/FBXW8/FBXO4/RBCK1/MED1/RNF19B/TRAF2/DET1/CDC20/FBXL15/RNF14/FBXO32/PEF1/MAEA
BP	GO:0031047	gene silencing by RNA	135	0.468536	1.20108	0.149451	0.674211	0.650563	2347	tags=27%, list=18%, signal=22%	HENMT1/MOV10L1/NUP210/ASZ1/ADAR/SEH1L/AGO4/NUP205/DICER1/NCOR1/MYCN/PABPC1/SND1/MOV10/DHX9/WTIP/PUM1/TDRD9/EIF4G1/PIWIL1/TNRC6A/EGFR/EXD1/NUP214/RANBP2/LIMD1/NUP153/ZC3H12A/CNOT2/EIF6/BMP4/RBM4/TPR/NUP98/HELZ/DDX5
BP	GO:0061384	heart trabecula morphogenesis	26	0.628726	1.3185	0.149515	0.674211	0.650563	1116	tags=23%, list=9%, signal=21%	ADAMTS1/TGFBR1/ADGRG6/TGFB2/NOTCH1/CHD7
BP	GO:0014020	primary neural tube formation	78	0.512636	1.23485	0.14978	0.674211	0.650563	1466	tags=15%, list=12%, signal=14%	LRP2/SEMA4C/STIL/LRP6/VANGL2/RPS7/CELSR1/TGFB2/HIF1A/TSC2/PTCH1/FUZ
CC	GO:0005765	lysosomal membrane	305	-0.414005	-1.16016	0.149826	0.674211	0.650563	2124	tags=29%, list=17%, signal=25%	DRAM1/MFSD8/VPS41/ARL8B/CTSA/DNAJC5/ITM2C/ATP6V1B2/SLC17A5/ATP6V1C1/LAMTOR2/VPS18/CTNS/SLC48A1/RAP1B/SYNGR1/TMEM192/GBA/SPPL2A/MCOLN3/STX8/RAB7A/CLN5/LAMTOR5/CYBRD1/RRAGA/MMD/SLC38A9/STARD3/VPS33A/LAPTM4A/CEACAM6/NEU1/LMBRD1/SIDT2/PSEN2/SLC46A3/LAMP1/ZFYVE26/ATP6V1H/SNAPIN/GNAI1/PIGR/TMEM106B/GNAQ/TLR3/LAMP5/SLC29A3/TM6SF1/TMEM9/GAA/RNF13/BRI3/VPS33B/SLC7A5/SLC36A1/GRN/CDIP1/B4GALT1/CP/CTSD/LAMP2…
CC	GO:0098852	lytic vacuole membrane	305	-0.414005	-1.16016	0.149826	0.674211	0.650563	2124	tags=29%, list=17%, signal=25%	DRAM1/MFSD8/VPS41/ARL8B/CTSA/DNAJC5/ITM2C/ATP6V1B2/SLC17A5/ATP6V1C1/LAMTOR2/VPS18/CTNS/SLC48A1/RAP1B/SYNGR1/TMEM192/GBA/SPPL2A/MCOLN3/STX8/RAB7A/CLN5/LAMTOR5/CYBRD1/RRAGA/MMD/SLC38A9/STARD3/VPS33A/LAPTM4A/CEACAM6/NEU1/LMBRD1/SIDT2/PSEN2/SLC46A3/LAMP1/ZFYVE26/ATP6V1H/SNAPIN/GNAI1/PIGR/TMEM106B/GNAQ/TLR3/LAMP5/SLC29A3/TM6SF1/TMEM9/GAA/RNF13/BRI3/VPS33B/SLC7A5/SLC36A1/GRN/CDIP1/B4GALT1/CP/CTSD/LAMP2…
BP	GO:1901985	positive regulation of protein acetylation	38	0.589115	1.29933	0.15	0.674211	0.650563	2654	tags=32%, list=21%, signal=25%	ISL1/PPARGC1A/SPHK2/CAMK1/ARNTL/CEP295/DIP2B/PRKAA2/AUTS2/IL1B/WBP2/TADA2B
MF	GO:0004180	carboxypeptidase activity	30	-0.62381	-1.2934	0.150198	0.674211	0.650563	1491	tags=33%, list=12%, signal=29%	CTSZ/CTSA/CPZ/PEPD/CPVL/CPB2/NAALADL1/SCPEP1/PRCP/CPQ
BP	GO:0098877	neurotransmitter receptor transport to plasma membrane	13	-0.708782	-1.28628	0.150198	0.674211	0.650563	1316	tags=46%, list=10%, signal=41%	SLC1A1/CPLX1/VPS35/SNAP25/CLSTN1/STX1B
BP	GO:0002043	blood vessel endothelial cell proliferation involved in sprouting angiogenesis	20	0.680467	1.31359	0.150206	0.674211	0.650563	414	tags=20%, list=3%, signal=19%	BMPER/SEMA5A/HMOX1/IL12B
BP	GO:1902235	regulation of endoplasmic reticulum stress-induced intrinsic apoptotic signaling pathway	20	0.679817	1.31233	0.150206	0.674211	0.650563	661	tags=20%, list=5%, signal=19%	PDX1/EIF2AK3/LRRK2/DDIT3
BP	GO:0034101	erythrocyte homeostasis	98	-0.488463	-1.20602	0.150538	0.674211	0.650563	1278	tags=27%, list=10%, signal=24%	EPO/KAT7/HOXA5/NCAPG2/TMOD3/BCL6/INHBA/FLVCR1/TAL1/MAFB/KLF1/GATA2/RB1/DMTN/TMEM14C/DNASE2/MED1/B2M/IKZF1/SLC4A1/MAEA/INPP5D/NCKAP1L/KLF13/SPI1/ALAS2
BP	GO:0014066	regulation of phosphatidylinositol 3-kinase signaling	103	0.496974	1.23119	0.150562	0.674211	0.650563	1610	tags=19%, list=13%, signal=17%	INS/PTPN13/ROR2/HGF/TGFB2/PLXNB1/PRR5/SRC/INSR/TSC2/PDGFRA/FLT1/PPP1R16B/KDR/PIP5K1A/IGF1R/PIP4K2A/ERBB4/EGFR/FYN
BP	GO:0097062	dendritic spine maintenance	17	0.687002	1.31365	0.150602	0.674211	0.650563	5	tags=6%, list=0%, signal=6%	INS
BP	GO:0006520	cellular amino acid metabolic process	266	0.436996	1.1998	0.150776	0.674211	0.650563	344	tags=4%, list=3%, signal=4%	INS/DDAH1/ASPG/DDC/GLUL/DPEP1/GART/TH/SLC39A8/PFAS/ALDH18A1
MF	GO:0019825	oxygen binding	22	-0.647813	-1.2903	0.15087	0.674211	0.650563	1152	tags=36%, list=9%, signal=33%	CYGB/CYP17A1/CYP3A4/CYP1A1/HBZ/CYP4B1/HBE1/MB
BP	GO:0030100	regulation of endocytosis	163	-0.450022	-1.18048	0.150909	0.674211	0.650563	1332	tags=15%, list=10%, signal=14%	RAB17/AHI1/PACSIN2/EPHA3/VTN/SNAP91/DKK1/SNCA/GATA2/CDH13/CD63/DRD2/WNT5A/UNC119/B2M/TOR1A/NEDD4L/STX1B/CLU/ANXA2/SYK/NCKAP1L/ITGB3/APOE/SLC17A7
BP	GO:0045766	positive regulation of angiogenesis	128	0.476589	1.20862	0.15103	0.674211	0.650563	754	tags=12%, list=6%, signal=12%	ANGPTL4/DDAH1/BMPER/PIK3R6/ISL1/CYP1B1/PDCL3/PTGIS/SEMA5A/HMOX1/PAK4/HGF/HSPB1/TIE1/IL10/TJP1
BP	GO:0150063	visual system development	300	0.432512	1.19452	0.15103	0.674211	0.650563	1262	tags=16%, list=10%, signal=15%	TBC1D32/FZD5/RP1L1/PAX6/LAMC3/WNT7A/CACNA1C/SDK2/TGFBR1/FREM2/TH/CYP1B1/MAF/FSCN2/LRP6/NEUROD1/MEIS2/TGIF2/TBX2/WNT9A/STRA6/NKD1/PTF1A/SHROOM2/BCAR3/PDE6C/CDON/COL8A1/TGFB2/RDH13/PROX1/MEIS1/RPL24/SOX2/IGFN1/CRB1/HIF1A/ADAMTS18/SLC25A25/NOTCH2/PDE6A/CHD7/PDGFRA/DIO3/ATP2B4/FLT1/PBX3/DCX/CRYBA2
BP	GO:1904018	positive regulation of vasculature development	128	0.476589	1.20862	0.15103	0.674211	0.650563	754	tags=12%, list=6%, signal=12%	ANGPTL4/DDAH1/BMPER/PIK3R6/ISL1/CYP1B1/PDCL3/PTGIS/SEMA5A/HMOX1/PAK4/HGF/HSPB1/TIE1/IL10/TJP1
BP	GO:0018205	peptidyl-lysine modification	329	0.434849	1.19409	0.151079	0.674211	0.650563	2076	tags=18%, list=16%, signal=15%	GCG/ISL1/NUP210/TRIM28/CRTC2/SIRT7/YEATS2/APBB1/KMT2C/HDAC4/SETD1A/KMT2A/KAT6B/SEH1L/PPARGC1A/NCOA1/CREBBP/GFI1/TRRAP/NUP205/SPHK2/KMT2E/ZMIZ1/EP400/RIF1/PRDM9/DYDC1/ASH1L/PLOD1/NCOA3/RNF212/BRD8/BRD1/EHMT1/SIRT3/MYOD1/SUPT6H/RASD2/PRDM5/NSD1/MCM3AP/NUP214/USPL1/LEF1/RANBP2/OGT/SETD2/PER1/TOPORS/NUP153/KMT2B/JARID2/DIP2B/ESCO1/MSL3/SETD5/EPC1/PRKAA2
BP	GO:0030510	regulation of BMP signaling pathway	72	0.513875	1.22294	0.151188	0.674211	0.650563	860	tags=11%, list=7%, signal=10%	LRP2/BMPER/FST/GREM2/FOXD1/NEO1/SULF1/NOTCH1
BP	GO:0009185	ribonucleoside diphosphate metabolic process	120	0.471032	1.18524	0.151242	0.674211	0.650563	1181	tags=13%, list=9%, signal=12%	INS/PGAM2/NUP210/HDAC4/SEH1L/PGK1/PPARGC1A/LRGUK/NUP205/NCOR1/HIF1A/PRKAG2/INSR/PGAM1/CASK/ZBTB7A
BP	GO:1904886	beta-catenin destruction complex disassembly	19	0.68066	1.31902	0.151822	0.674211	0.650563	299	tags=11%, list=2%, signal=10%	FZD5/LRP6
BP	GO:0006310	DNA recombination	228	-0.427251	-1.16168	0.151899	0.674211	0.650563	1864	tags=18%, list=15%, signal=15%	SAMHD1/MCM6/MCM5/NDFIP1/RPAIN/RBBP8/TPRKB/RAD51/MCM3/GINS4/PAGR1/BRCA2/AUNIP/MCM2/ACTR2/ZFYVE26/MLH3/BCL6/RAD54L/REC114/POLQ/PARP3/MCM4/UNG/SMC5/SYCP1/MLH1/ACTR8/FANCD2/DMC1/MND1/RHNO1/TFRC/SWAP70/PTPRC/ZSWIM7/WAS/RAD51AP1/GEN1/SWI5
BP	GO:0006829	zinc ion transport	21	-0.649243	-1.28514	0.152047	0.674211	0.650563	446	tags=14%, list=4%, signal=14%	TMEM163/SLC30A4/SLC30A1
BP	GO:0010714	positive regulation of collagen metabolic process	21	-0.650523	-1.28767	0.152047	0.674211	0.650563	904	tags=29%, list=7%, signal=27%	RGCC/VIM/CBX8/TGFB3/MYB/RUNX1
BP	GO:0032607	interferon-alpha production	21	-0.650618	-1.28786	0.152047	0.674211	0.650563	1228	tags=29%, list=10%, signal=26%	TLR3/TBK1/HAVCR2/TLR7/PTPRS/TLR9
BP	GO:0032647	regulation of interferon-alpha production	21	-0.650618	-1.28786	0.152047	0.674211	0.650563	1228	tags=29%, list=10%, signal=26%	TLR3/TBK1/HAVCR2/TLR7/PTPRS/TLR9
BP	GO:0032967	positive regulation of collagen biosynthetic process	21	-0.650523	-1.28767	0.152047	0.674211	0.650563	904	tags=29%, list=7%, signal=27%	RGCC/VIM/CBX8/TGFB3/MYB/RUNX1
MF	GO:0008171	O-methyltransferase activity	20	0.67575	1.30448	0.152263	0.674211	0.650563	57	tags=5%, list=0%, signal=5%	HENMT1
MF	GO:0004867	serine-type endopeptidase inhibitor activity	48	-0.552355	-1.24423	0.15233	0.674211	0.650563	2396	tags=35%, list=19%, signal=29%	SERPINH1/WFIKKN2/TFPI2/SERPINA10/CD109/SERPINE2/SERPINB6/ITIH4/A2ML1/ITIH3/ITIH2/PAPLN/SERPIND1/COL7A1/A2M/ANXA2/SERPING1
BP	GO:0005975	carbohydrate metabolic process	487	0.418668	1.18645	0.152425	0.674211	0.650563	1446	tags=14%, list=11%, signal=13%	GCG/INS/KLB/CHIA/PDX1/LALBA/PGAM2/ATF3/STK40/NUP210/FAM3C/INPP5J/CRTC2/PC/SIRT7/SLC2A5/ACACB/HAS3/PDK1/GALNT3/HDAC4/PHKA2/SEH1L/PGK1/GANC/PPARGC1A/NCOA2/SLC39A14/NISCH/LCT/ONECUT1/NUP205/PASK/SIK1/NKX1-1/NANS/LDHB/XYLB/TKT/NCOR1/SRC/NR1D1/ST3GAL2/CPT1A/SOGA1/APOD/HIF1A/PRKAG2/INSR/FUT5/PGAM1/B3GAT1/ST6GALNAC1/SYNJ1/PMM1/MTMR7/ZBTB7A/DYRK2/SLC23A1/PLA2G4A/CLTC/MIDN/IPPK/KL/SLC25A12/GPT/CHST12/GBA2…
BP	GO:0048268	clathrin coat assembly	15	0.694694	1.31298	0.15261	0.674211	0.650563	2116	tags=47%, list=17%, signal=39%	SGIP1/HIP1/NSG1/CLTC/PICALM/AP2B1/EPS15
BP	GO:0051354	negative regulation of oxidoreductase activity	17	0.686848	1.31336	0.15261	0.674211	0.650563	206	tags=12%, list=2%, signal=12%	INS/CYP27B1
BP	GO:0031056	regulation of histone modification	116	0.472245	1.1897	0.152809	0.674211	0.650563	957	tags=9%, list=8%, signal=9%	GCG/ISL1/KMT2A/PPARGC1A/LRRK2/GFI1/SPHK2/KMT2E/KDM5A/RIF1/PRDM9
BP	GO:0032890	regulation of organic acid transport	48	0.559894	1.24869	0.153153	0.674211	0.650563	875	tags=12%, list=7%, signal=12%	ACSL5/RGS2/HRH3/SLC12A2/SLC38A3/PLA2R1
BP	GO:0046621	negative regulation of organ growth	28	0.624547	1.30937	0.153386	0.674211	0.650563	888	tags=18%, list=7%, signal=17%	RGS2/WWC3/CTDP1/KCNK2/MEIS1
BP	GO:0045824	negative regulation of innate immune response	41	0.578121	1.2771	0.153518	0.674211	0.650563	346	tags=7%, list=3%, signal=7%	INS/RPS19/ADAR
BP	GO:0032729	positive regulation of interferon-gamma production	41	-0.5796	-1.25758	0.153846	0.674211	0.650563	1228	tags=46%, list=10%, signal=42%	TLR3/LTA/SLC7A5/EBI3/CRTAM/HLA-A/HAVCR2/WNT5A/CD2/RASGRP1/SLAMF6/HLA-DPA1/TLR7/CD276/TLR9/SASH3/HLA-DPB1/CD3E/IRF8
CC	GO:0005777	peroxisome	114	0.477498	1.19886	0.154018	0.674211	0.650563	1082	tags=10%, list=9%, signal=9%	AOC1/SZT2/VWA8/ABCD2/CROT/HSDL2/TKT/MPV17/HACL1/PEX6/FABP1
CC	GO:0042579	microbody	114	0.477498	1.19886	0.154018	0.674211	0.650563	1082	tags=10%, list=9%, signal=9%	AOC1/SZT2/VWA8/ABCD2/CROT/HSDL2/TKT/MPV17/HACL1/PEX6/FABP1
BP	GO:0043649	dicarboxylic acid catabolic process	14	0.694583	1.29971	0.154158	0.674211	0.650563	59	tags=7%, list=0%, signal=7%	GLUL
MF	GO:0071837	HMG box domain binding	14	0.695167	1.3008	0.154158	0.674211	0.650563	2883	tags=36%, list=23%, signal=28%	POU3F3/JUN/HOXC4/EGR2/ALX4
BP	GO:0051208	sequestering of calcium ion	88	-0.498779	-1.21717	0.154265	0.674211	0.650563	1757	tags=23%, list=14%, signal=20%	CASQ1/DHRS7C/MCOLN3/CASQ2/SLC8A1/ANK2/JPH3/JPH1/FKBP1B/SNCA/DRD2/XCR1/P2RY6/CXCL10/PTPRC/TMEM38A/FASLG/DMD/CCR7/CCL3
BP	GO:0046627	negative regulation of insulin receptor signaling pathway	33	0.599209	1.29227	0.154321	0.674211	0.650563	1855	tags=18%, list=15%, signal=16%	TNS2/TSC2/PIP4K2A/PTPN2/SLC27A4/MSTN
BP	GO:0001678	cellular glucose homeostasis	115	0.47203	1.18768	0.154362	0.674211	0.650563	588	tags=7%, list=5%, signal=7%	GCG/CFTR/PDX1/TH/RFX6/NEUROD1/PPARGC1A/SLC39A14
BP	GO:0009306	protein secretion	284	0.425777	1.17392	0.154545	0.674211	0.650563	1053	tags=10%, list=8%, signal=9%	GCG/INS/CFTR/PDX1/CACNA1C/P3H1/ISL1/RFX6/DISP1/NEUROD1/SLC16A1/SLC12A2/APBB1/IL12B/STXBP5L/NR0B2/KCNC2/RIMS2/VGF/SSTR5/TGFB2/NR1D1/ADAM9/FAM3D/INHBB/CPT1A/HIF1A/ANO1
BP	GO:0035592	establishment of protein localization to extracellular region	284	0.425777	1.17392	0.154545	0.674211	0.650563	1053	tags=10%, list=8%, signal=9%	GCG/INS/CFTR/PDX1/CACNA1C/P3H1/ISL1/RFX6/DISP1/NEUROD1/SLC16A1/SLC12A2/APBB1/IL12B/STXBP5L/NR0B2/KCNC2/RIMS2/VGF/SSTR5/TGFB2/NR1D1/ADAM9/FAM3D/INHBB/CPT1A/HIF1A/ANO1
BP	GO:0098901	regulation of cardiac muscle cell action potential	22	0.663597	1.30078	0.154639	0.674211	0.650563	196	tags=14%, list=2%, signal=13%	CACNA1C/DSP/RYR2
BP	GO:0120163	negative regulation of cold-induced thermogenesis	37	-0.594193	-1.25764	0.154739	0.674211	0.650563	8	tags=5%, list=0%, signal=5%	RB1/ABHD6
CC	GO:0000145	exocyst	15	-0.6912	-1.28845	0.154762	0.674211	0.650563	996	tags=27%, list=8%, signal=25%	EXOC4/MYRIP/RAB10/SH3BP1
CC	GO:0030133	transport vesicle	317	0.433682	1.19302	0.15493	0.674211	0.650563	618	tags=6%, list=5%, signal=6%	PCSK2/INS/PCSK1/DDC/AREG/SYTL2/CUZD1/TRIM9/SEMA4C/TH/SCGN/STEAP2/SCG3/SYT12/SCAP/ECE2/RAB40C/AFTPH/LRRK2/STX12
BP	GO:0097300	programmed necrotic cell death	33	-0.606097	-1.26763	0.155039	0.674211	0.650563	2334	tags=30%, list=18%, signal=25%	TNF/FAS/ALKBH7/CFLAR/CASP1/TLR3/ARHGEF2/RBCK1/TRAF2/FASLG
BP	GO:0090280	positive regulation of calcium ion import	13	0.704806	1.30689	0.155242	0.674211	0.650563	4	tags=8%, list=0%, signal=8%	GCG
BP	GO:0035036	sperm-egg recognition	26	0.626597	1.31404	0.15534	0.674211	0.650563	854	tags=19%, list=7%, signal=18%	FOLR2/ZAN/UBAP2L/ZP1/CCT2
BP	GO:0060606	tube closure	75	0.511357	1.22609	0.155361	0.674211	0.650563	831	tags=11%, list=7%, signal=10%	LRP2/SEMA4C/STIL/LRP6/VANGL2/RPS7/CELSR1/TGFB2
BP	GO:0045940	positive regulation of steroid metabolic process	19	-0.657631	-1.28512	0.155512	0.674211	0.650563	52	tags=16%, list=0%, signal=16%	SREBF1/APOE/APOA4
BP	GO:0060343	trabecula formation	18	0.692816	1.33018	0.155556	0.674211	0.650563	1758	tags=33%, list=14%, signal=29%	ADAMTS1/ADGRG6/PPARGC1B/GREM1/FBN2/SRF
BP	GO:0052547	regulation of peptidase activity	293	-0.420147	-1.16638	0.155797	0.674211	0.650563	2427	tags=27%, list=19%, signal=22%	NCSTN/PRDX3/SERPINH1/WFIKKN2/PYCARD/TFPI2/TNF/SERPINA10/SPOCK3/SVBP/LTF/CD109/TNFSF10/FAS/ARL6IP1/MBP/USP47/FETUB/TP63/SERPINE2/SERPINB6/PDCD5/HTRA2/ITIH4/C3/A2ML1/KNG1/CFLAR/C4B/CASP1/LAMTOR5/ITIH3/XDH/ITIH2/IFT57/ECM1/GPX1/DNAJB6/MEFV/CST7/SLC1A1/VTN/CD27/PAPLN/ACER2/SERPIND1/SPOCK2/GSN/THBS1/BCAP31/GRN/AQP1/EGLN3/SNCA/CTSD/ROBO1/TANK/CIDEB/UMODL1/PLAUR/CRYAB/TRAF2/PRDX5/GRIN1/COL7A1/PSMB9/PERP…
BP	GO:0050804	modulation of chemical synaptic transmission	355	-0.40492	-1.14499	0.155867	0.674211	0.650563	1524	tags=18%, list=12%, signal=16%	ERC2/CYFIP1/LGI1/DTNBP1/CD38/AKAP12/SLC24A2/CYP46A1/CELF4/PCDH17/PACSIN2/SLC1A1/SNAPIN/GNAI1/CALB2/JPH3/ADCY8/KRAS/NRXN1/PRKAR1B/SLC8A2/DLGAP4/DLGAP3/BRSK1/CAMK2B/DLGAP1/CPLX1/GRIK4/P2RY1/CSPG5/CRH/PRRT2/RGS14/LZTS1/CNR2/SYN1/GRID2/DRD2/ABR/GRM8/BDNF/CDC20/GRIN1/GRIK2/SNAP25/CBLN1/GRM7/CLSTN1/NTRK2/PRKAR2B/STX1B/PTPRS/SHISA9/ADCYAP1/CNIH2/NEUROD2/ADRA2A/RIMS4/LGMN/APOE/SLC30A1/ABHD6/GRIN2C
BP	GO:0099177	regulation of trans-synaptic signaling	355	-0.40492	-1.14499	0.155867	0.674211	0.650563	1524	tags=18%, list=12%, signal=16%	ERC2/CYFIP1/LGI1/DTNBP1/CD38/AKAP12/SLC24A2/CYP46A1/CELF4/PCDH17/PACSIN2/SLC1A1/SNAPIN/GNAI1/CALB2/JPH3/ADCY8/KRAS/NRXN1/PRKAR1B/SLC8A2/DLGAP4/DLGAP3/BRSK1/CAMK2B/DLGAP1/CPLX1/GRIK4/P2RY1/CSPG5/CRH/PRRT2/RGS14/LZTS1/CNR2/SYN1/GRID2/DRD2/ABR/GRM8/BDNF/CDC20/GRIN1/GRIK2/SNAP25/CBLN1/GRM7/CLSTN1/NTRK2/PRKAR2B/STX1B/PTPRS/SHISA9/ADCYAP1/CNIH2/NEUROD2/ADRA2A/RIMS4/LGMN/APOE/SLC30A1/ABHD6/GRIN2C
BP	GO:2000677	regulation of transcription regulatory region DNA binding	40	0.581904	1.28074	0.155983	0.674211	0.650563	2338	tags=32%, list=18%, signal=27%	PAX6/HAND2/NEUROD1/DDIT3/MSX2/ZBTB7A/HAND1/NSD1/FBXW7/KLF4/MAD2L2/SIN3A/IGF1
CC	GO:0120111	neuron projection cytoplasm	76	-0.506622	-1.21299	0.156134	0.674211	0.650563	1580	tags=18%, list=12%, signal=16%	KIF5C/DTNBP1/KLHL17/SNAPIN/DLG2/KIF5A/NEFL/BLOC1S3/BLOC1S2/AP3M2/GRIK2/ADA/MAP2/MGARP
BP	GO:0030903	notochord development	14	0.694044	1.2987	0.156187	0.674211	0.650563	946	tags=29%, list=7%, signal=26%	STIL/GLI1/WNT11/COL2A1
MF	GO:0030247	polysaccharide binding	16	-0.683067	-1.28385	0.156313	0.674211	0.650563	2633	tags=44%, list=21%, signal=35%	PPP1R3B/CLEC4G/ENDOU/PPP1R3D/VTN/STBD1/PPP1R3C
CC	GO:0045121	membrane raft	262	-0.422355	-1.16213	0.156364	0.674211	0.650563	1361	tags=18%, list=11%, signal=17%	PSEN2/P2RY12/PACSIN2/RTN4R/STIM1/BAALC/GNAI1/PRKAR2A/ADCY8/KRAS/ICAM1/CSK/ATP1A1/CD55/SLC9A1/CTSD/PLVAP/LAMP2/CDH13/MAG/PDPN/LTB4R/CD48/SLC9A3R1/TRAF2/CD2/MLC1/ATP2B1/TLR1/ASAH2/CORO1C/ADTRP/SELPLG/PRKAR2B/SKAP1/GLIPR1L1/ZAP70/PTPRC/ADD2/ANXA2/EEF2/ITGB2/TUBA1B/FASLG/INPP5D/LCP2/DMD/TNFRSF1B
CC	GO:0098857	membrane microdomain	262	-0.422355	-1.16213	0.156364	0.674211	0.650563	1361	tags=18%, list=11%, signal=17%	PSEN2/P2RY12/PACSIN2/RTN4R/STIM1/BAALC/GNAI1/PRKAR2A/ADCY8/KRAS/ICAM1/CSK/ATP1A1/CD55/SLC9A1/CTSD/PLVAP/LAMP2/CDH13/MAG/PDPN/LTB4R/CD48/SLC9A3R1/TRAF2/CD2/MLC1/ATP2B1/TLR1/ASAH2/CORO1C/ADTRP/SELPLG/PRKAR2B/SKAP1/GLIPR1L1/ZAP70/PTPRC/ADD2/ANXA2/EEF2/ITGB2/TUBA1B/FASLG/INPP5D/LCP2/DMD/TNFRSF1B
BP	GO:0035194	post-transcriptional gene silencing by RNA	115	0.470495	1.18382	0.1566	0.674211	0.650563	2408	tags=26%, list=19%, signal=21%	HENMT1/MOV10L1/NUP210/ADAR/SEH1L/AGO4/NUP205/DICER1/NCOR1/MYCN/MOV10/DHX9/WTIP/PUM1/EIF4G1/TNRC6A/EGFR/NUP214/RANBP2/LIMD1/NUP153/ZC3H12A/EIF6/BMP4/RBM4/TPR/NUP98/HELZ/DDX5/DGCR8
BP	GO:0002903	negative regulation of B cell apoptotic process	10	-0.746213	-1.31327	0.1569	0.674211	0.650563	1278	tags=40%, list=10%, signal=36%	FOXP1/BCL6/AURKB/ADA
BP	GO:1900271	regulation of long-term synaptic potentiation	36	0.580045	1.26665	0.157025	0.674211	0.650563	194	tags=6%, list=2%, signal=5%	INS/SCGN
MF	GO:0050780	dopamine receptor binding	14	-0.701736	-1.28448	0.157171	0.674211	0.650563	668	tags=36%, list=5%, signal=34%	PALM/SLC9A3R1/VPS35/SNX5/PPP1R1B
BP	GO:0071333	cellular response to glucose stimulus	101	0.493218	1.21699	0.157175	0.674211	0.650563	588	tags=8%, list=5%, signal=8%	GCG/CFTR/PDX1/TH/RFX6/NEUROD1/PPARGC1A/SLC39A14
BP	GO:0014072	response to isoquinoline alkaloid	24	-0.637491	-1.27165	0.157258	0.674211	0.650563	1924	tags=33%, list=15%, signal=28%	CNR1/CXCR4/ATG7/SRR/ADCY8/DRD2/PPP1R1B/ADA
BP	GO:0043278	response to morphine	24	-0.637491	-1.27165	0.157258	0.674211	0.650563	1924	tags=33%, list=15%, signal=28%	CNR1/CXCR4/ATG7/SRR/ADCY8/DRD2/PPP1R1B/ADA
[truncated: 5,674 more rows]

## Sheet: sigTerms
ONTOLOGY	ID	Description	setSize	enrichmentScore	NES	pvalue	p.adjust	qvalues	rank	leading_edge	core_enrichment
[truncated: 33 more rows]

[truncated: 1 more sheets: sigTerms_sorted]
