# Supplementary material for: An automated feeding system for the African killifish reveals the impact of diet on lifespan and allows scalable assessment of associative learning
Source: eLife. 2022 Nov 10;11:e69008. doi: 10.7554/eLife.69008 (PMC9788828; doi:10.7554/eLife.69008)
Supplement: Figure 5—source data 8. [file elife-69008-fig5-data8.xlsx]

## Sheet: GOBP_dietDEG_m_DR_UP_220714
GOBPID	Pvalue	OddsRatio	ExpCount	Count	Size	Term	enrichment	padj
GO:0050708	3.87e-05	16.6524	0.404738	5	321	regulation of protein secretion	0.860434	0.00373068
GO:0002791	5.68e-05	15.3134	0.438782	5	348	regulation of peptide secretion	0.732098	0.00373068
GO:0009306	0.00012774	12.8169	0.520738	5	413	protein secretion	0.51979	0.00373068
GO:0035592	0.00012774	12.8169	0.520738	5	413	establishment of protein localization to extracellular region	0.51979	0.00373068
GO:0071692	0.000135169	12.6574	0.527042	5	418	protein localization to extracellular region	0.507429	0.00373068
GO:0002790	0.000183135	11.8311	0.562347	5	446	peptide secretion	0.445716	0.0042121
GO:0010817	0.000363597	10.1409	0.651868	5	517	regulation of hormone levels	0.331701	0.00716805
GO:1903530	0.000821984	8.41121	0.779216	5	618	regulation of secretion by cell	0.23214	0.0140651
GO:0051223	0.000997102	8.04129	0.813259	5	645	regulation of protein transport	0.213112	0.0140651
GO:0051046	0.0011133	7.83645	0.833433	5	661	regulation of secretion	0.20292	0.0140651
GO:0070201	0.00117507	7.73774	0.84352	5	669	regulation of establishment of protein localization	0.198096	0.0140651
GO:0090087	0.00122305	7.66525	0.851085	5	675	regulation of peptide transport	0.19459	0.0140651
GO:0044283	0.00162114	7.17087	0.906563	5	719	small molecule biosynthetic process	0.171502	0.017209
GO:0071702	0.00424501	3.9066	3.56447	9	2827	organic substance transport	0.0199686	0.0385731
GO:0043066	0.00438826	5.62838	1.13856	5	903	negative regulation of apoptotic process	0.108731	0.0385731
GO:0044070	0.00447224	5.60184	1.14361	5	907	regulation of anion transport	0.107774	0.0385731
GO:0043069	0.0047976	5.50436	1.16252	5	922	negative regulation of programmed cell death	0.104296	0.0389453
GO:0006820	0.0055686	3.72287	3.70569	9	2939	anion transport	0.0184757	0.0426926
GO:0032880	0.00668621	5.0612	1.25708	5	997	regulation of protein localization	0.0891944	0.0463504
GO:0071705	0.00676942	3.75123	3.09165	8	2452	nitrogen compound transport	0.0235943	0.0463504
GO:0009725	0.00726853	4.95412	1.2823	5	1017	response to hormone	0.0857207	0.0463504
GO:0060548	0.0073892	4.93321	1.28734	5	1021	negative regulation of cell death	0.0850504	0.0463504
GO:0008219	0.0134318	3.45678	2.74869	7	2180	cell death	0.0261182	0.0805911
GO:0010941	0.0145761	3.67308	2.12582	6	1686	regulation of cell death	0.0374278	0.0838125
GO:0065008	0.0160153	2.9925	5.15064	10	4085	regulation of biological quality	0.0106261	0.0884044
GO:0009719	0.0178867	3.49413	2.22165	6	1762	response to endogenous stimulus	0.0342687	0.0949368
GO:1901700	0.0186948	3.4562	2.24308	6	1779	response to oxygen-containing compound	0.0336169	0.0955513
GO:0043269	0.0205988	3.75218	1.65552	5	1313	regulation of ion transport	0.0514278	0.101523
GO:0006811	0.0216891	2.86773	4.54416	9	3604	ion transport	0.0122866	0.10321
GO:0044281	0.0274838	3.13564	2.4423	6	1937	small molecule metabolic process	0.0283563	0.126425
GO:0006915	0.0285093	3.10608	2.46247	6	1953	apoptotic process	0.0278936	0.126912
GO:0032940	0.0313639	3.32941	1.84465	5	1463	secretion by cell	0.0414228	0.134559
GO:0055085	0.0334563	3.26727	1.87617	5	1488	transmembrane transport	0.0400426	0.134559
GO:0012501	0.033815	2.97036	2.55956	6	2030	programmed cell death	0.0258177	0.134559
GO:0071495	0.0345794	3.23577	1.89256	5	1501	cellular response to endogenous stimulus	0.039352	0.134559
GO:0140352	0.0354597	3.21191	1.90517	5	1511	export from cell	0.0388328	0.134559
GO:0042981	0.0362642	3.19071	1.91652	5	1520	regulation of apoptotic process	0.0383743	0.134559
GO:0015031	0.0370524	2.89896	2.61378	6	2073	protein transport	0.0247577	0.134559
GO:0032502	0.0390328	2.51869	7.70011	12	6107	developmental process	0.00570536	0.134982
GO:0043067	0.0391252	3.11957	1.9556	5	1551	regulation of programmed cell death	0.0368557	0.134982
GO:0015833	0.0401641	2.83673	2.66295	6	2112	peptide transport	0.0238518	0.135186
GO:0042886	0.0430157	2.78433	2.70582	6	2146	amide transport	0.023102	0.136596
GO:0046903	0.0432256	3.02762	2.00856	5	1593	secretion	0.0349378	0.136596
GO:0033036	0.0435523	2.52353	4.25543	8	3375	macromolecule localization	0.0124537	0.136596
GO:0045184	0.0457302	2.73798	2.74491	6	2177	establishment of protein localization	0.0224487	0.140239
GO:0007267	0.0512019	2.87497	2.10313	5	1668	cell-cell signaling	0.0318666	0.151987
GO:0042127	0.0517638	2.86528	2.10943	5	1673	regulation of cell population proliferation	0.0316764	0.151987
GO:0048856	0.0590263	2.27469	7.16298	11	5681	anatomical structure development	0.00604367	0.167497
GO:0008104	0.0598755	2.41297	3.70317	7	2937	protein localization	0.0143896	0.167497
GO:1901575	0.0610981	2.52349	2.9416	6	2333	organic substance catabolic process	0.019547	0.167497
GO:0051049	0.0619012	2.70903	2.2166	5	1758	regulation of transport	0.0286873	0.167497
GO:0006810	0.0699757	2.18261	6.41403	10	5087	transport	0.00685227	0.183414
GO:0051179	0.0721135	2.1954	8.33559	12	6611	localization	0.00486861	0.183414
GO:0010647	0.0731515	2.56723	2.32378	5	1843	positive regulation of cell communication	0.0261022	0.183414
GO:0023056	0.0741278	2.55614	2.3326	5	1850	positive regulation of signaling	0.025905	0.183414
GO:0044248	0.0744288	2.38175	3.08786	6	2449	cellular catabolic process	0.0177391	0.183414
GO:0051234	0.0807037	2.10718	6.56407	10	5206	establishment of localization	0.00654259	0.195388
GO:0031328	0.0847604	2.44526	2.42465	5	1923	positive regulation of cellular biosynthetic process	0.0239756	0.201004
GO:0032268	0.0861822	2.27856	3.20386	6	2541	regulation of cellular protein metabolic process	0.0164778	0.201004
GO:0009891	0.0887456	2.40777	2.45743	5	1949	positive regulation of biosynthetic process	0.0233402	0.201004
GO:0042592	0.0901493	2.39503	2.46878	5	1958	homeostatic process	0.0231261	0.201004
GO:0008283	0.090306	2.39362	2.47004	5	1959	cell population proliferation	0.0231025	0.201004
GO:0010033	0.106464	2.05147	4.21003	7	3339	response to organic substance	0.0111333	0.230374
GO:0051246	0.10684	2.13031	3.38669	6	2686	regulation of protein metabolic process	0.0147468	0.230374
GO:0048731	0.110686	1.95098	6.00173	9	4760	system development	0.00704346	0.234995
GO:0071310	0.114723	2.08191	3.45099	6	2737	cellular response to organic substance	0.0142023	0.239876
GO:0009056	0.126225	2.01746	3.54051	6	2808	catabolic process	0.0134932	0.259986
GO:0032879	0.130759	1.9938	3.57456	6	2835	regulation of localization	0.0132374	0.265363
GO:0080090	0.139052	1.82107	7.20333	10	5713	regulation of primary metabolic process	0.00543287	0.277903
GO:0009653	0.140965	1.94364	3.64895	6	2894	anatomical structure morphogenesis	0.0127032	0.277903
GO:0051173	0.173001	1.80845	3.86582	6	3066	positive regulation of nitrogen compound metabolic process	0.0113179	0.333285
GO:0032501	0.173888	1.71132	8.46798	11	6716	multicellular organismal process	0.00432443	0.333285
GO:0007275	0.180675	1.6864	6.61451	9	5246	multicellular organism development	0.00579887	0.34155
GO:0007399	0.197046	1.79372	3.15721	5	2504	nervous system development	0.0141403	0.367463
GO:0048519	0.206877	1.61299	6.80742	9	5399	negative regulation of biological process	0.00547487	0.380653
GO:0031325	0.213566	1.67115	4.11421	6	3263	positive regulation of cellular metabolic process	0.00999252	0.38779
GO:0070887	0.221605	1.64719	4.16086	6	3300	cellular response to chemical stimulus	0.0097697	0.397162
GO:0051171	0.226127	1.56452	6.94107	9	5505	regulation of nitrogen compound metabolic process	0.00526606	0.400071
GO:0030154	0.23001	1.58704	5.10903	7	4052	cell differentiation	0.00755992	0.40179
GO:0010604	0.233558	1.61318	4.22895	6	3354	positive regulation of macromolecule metabolic process	0.00945764	0.402888
GO:0019538	0.237023	1.53878	7.0142	9	5563	protein metabolic process	0.00515682	0.403818
GO:0051239	0.242091	1.64397	3.39299	5	2691	regulation of multicellular organismal process	0.0122434	0.407422
GO:0048869	0.245928	1.54702	5.20486	7	4128	cellular developmental process	0.00728411	0.408892
GO:0048523	0.261635	1.49245	6.22742	8	4939	negative regulation of cellular process	0.00581527	0.426761
GO:0048513	0.26286	1.53678	4.39034	6	3482	animal organ development	0.00877509	0.426761
GO:0042221	0.272381	1.48576	5.35868	7	4250	response to chemical	0.00687192	0.433421
GO:0019222	0.275788	1.45601	8.22589	10	6524	regulation of metabolic process	0.0041661	0.433421
GO:1901564	0.276385	1.45483	8.22968	10	6527	organonitrogen compound metabolic process	0.00416227	0.433421
GO:0044249	0.28712	1.43293	7.33194	9	5815	cellular biosynthetic process	0.00471955	0.445198
GO:0044267	0.300104	1.41386	6.45564	8	5120	cellular protein metabolic process	0.00541138	0.459665
GO:0009893	0.303112	1.44465	4.60216	6	3650	positive regulation of metabolic process	0.00798589	0.459665
GO:1901576	0.309188	1.39149	7.46433	9	5920	organic substance biosynthetic process	0.00455362	0.463782
GO:0031323	0.31432	1.38222	7.49459	9	5944	regulation of cellular metabolic process	0.00451692	0.46641
GO:0060255	0.32013	1.37189	7.52863	9	5971	regulation of macromolecule metabolic process	0.00447616	0.469978
GO:0009058	0.324458	1.36429	7.55385	9	5991	biosynthetic process	0.00444633	0.471318
GO:0048518	0.340425	1.33699	7.6459	9	6064	positive regulation of biological process	0.00433992	0.489361
GO:0006950	0.344964	1.36064	4.81399	6	3818	response to stress	0.00729856	0.490773
GO:0031326	0.37993	1.29743	4.98673	6	3955	regulation of cellular biosynthetic process	0.00680168	0.535004
GO:0009889	0.400319	1.26293	5.08634	6	4034	regulation of biosynthetic process	0.00653788	0.558021
GO:0048522	0.411684	1.22762	7.06968	8	5607	positive regulation of cellular process	0.00451218	0.568123
GO:0050896	0.444857	1.19023	10.1853	11	8078	response to stimulus	0.00298912	0.607824
GO:0010646	0.478085	1.15481	4.48869	5	3560	regulation of cell communication	0.00699564	0.643502
GO:0051252	0.480295	1.15142	4.49877	5	3568	regulation of RNA metabolic process	0.00696431	0.643502
GO:0044238	0.485577	1.16071	12.3729	13	9813	primary metabolic process	0.00239385	0.643925
GO:0023051	0.489943	1.13674	4.5429	5	3603	regulation of signaling	0.00682966	0.643925
GO:0050794	0.52106	1.11253	12.5544	13	9957	regulation of cellular process	0.00232511	0.67373
GO:0009987	0.522385	Inf	18.362	19	14563	cellular process	0.00158858	0.67373
GO:0051641	0.532156	1.07504	4.73834	5	3758	cellular localization	0.0062779	0.679976
GO:0019219	0.552998	1.04589	4.83668	5	3836	regulation of nucleobase-containing compound metabolic process	0.00602519	0.696799
GO:0006807	0.560687	1.0498	11.7841	12	9346	nitrogen compound metabolic process	0.00243606	0.696799
GO:0044260	0.565363	1.03139	9.85367	10	7815	cellular macromolecule metabolic process	0.00290335	0.696799
GO:0034645	0.565518	1.02554	5.89707	6	4677	cellular macromolecule biosynthetic process	0.00486378	0.696799
GO:0009059	0.586707	0.998658	6.00551	6	4763	macromolecule biosynthetic process	0.00468973	0.712755
GO:0065007	0.588797	1.03824	13.8607	14	10993	biological regulation	0.00205425	0.712755
GO:0071704	0.609895	0.997962	13.0084	13	10317	organic substance metabolic process	0.00216568	0.720827
GO:0006464	0.611136	0.968054	5.12038	5	4061	cellular protein modification process	0.00537603	0.720827
GO:0036211	0.611136	0.968054	5.12038	5	4061	protein modification process	0.00537603	0.720827
GO:0043170	0.617387	0.97496	11.1171	11	8817	macromolecule metabolic process	0.00250905	0.722029
GO:0071840	0.630696	0.948907	8.24355	8	6538	cellular component organization or biogenesis	0.00331862	0.731395
GO:0050789	0.636604	0.964535	13.1471	13	10427	regulation of biological process	0.00212023	0.732095
GO:0043412	0.657435	0.908754	5.35994	5	4251	macromolecule modification	0.0049062	0.747627
GO:0023052	0.660945	0.910993	7.41642	7	5882	signaling	0.00358761	0.747627
GO:0007154	0.666819	0.904157	7.45046	7	5909	cell communication	0.0035549	0.748138
GO:0051716	0.686514	0.884961	8.57011	8	6797	cellular response to stimulus	0.00307053	0.758893
GO:0016070	0.687403	0.871148	5.52386	5	4381	RNA metabolic process	0.00461935	0.758893
GO:0008152	0.709496	0.873737	13.5392	13	10738	metabolic process	0.00199919	0.777067
GO:0010468	0.71947	0.831228	5.7092	5	4528	regulation of gene expression	0.00432429	0.781786
GO:0007165	0.72874	0.826695	6.80616	6	5398	signal transduction	0.00365126	0.785673
GO:0010467	0.741157	0.811817	6.88559	6	5461	gene expression	0.0035675	0.790476
GO:0044271	0.750492	0.79259	5.90086	5	4680	cellular nitrogen compound biosynthetic process	0.00404796	0.790476
GO:0044237	0.753064	0.817608	12.8634	12	10202	cellular metabolic process	0.00204441	0.790476
GO:0016043	0.756108	0.800084	8.01029	7	6353	cellular component organization	0.00307537	0.790476
GO:0090304	0.784329	0.749963	6.12781	5	4860	nucleic acid metabolic process	0.00375366	0.813815
GO:1901360	0.806961	0.731139	7.35085	6	5830	organic cyclic compound metabolic process	0.0031302	0.831049
GO:0034641	0.851571	0.672713	7.72911	6	6130	cellular nitrogen compound metabolic process	0.00283131	0.870495
GO:0006139	0.86783	0.637859	6.81751	5	5407	nucleobase-containing compound metabolic process	0.0030326	0.880592
GO:0046483	0.887454	0.608542	7.02429	5	5571	heterocycle metabolic process	0.00285668	0.891231
GO:0006725	0.891231	0.602679	7.06716	5	5605	cellular aromatic compound metabolic process	0.00282213	0.891231

## Sheet: GOBP_dietDEG_m_AL_UP_220714
GOBPID	Pvalue	OddsRatio	ExpCount	Count	Size	Term	enrichment	padj
GO:0015850	8.49e-05	13.0121	0.45869	5	216	organic hydroxy compound transport	1.90029	0.0112024
GO:0046486	0.000328926	7.54967	0.959851	6	452	glycerolipid metabolic process	0.520753	0.0217091
GO:0006650	0.00085221	7.74823	0.755989	5	356	glycerophospholipid metabolic process	0.699564	0.0374972
GO:0006644	0.002157	6.23101	0.932245	5	439	phospholipid metabolic process	0.460043	0.0537242
GO:0098916	0.00271926	4.92536	1.4419	6	679	anterograde trans-synaptic signaling	0.230765	0.0537242
GO:0007268	0.00271926	4.92536	1.4419	6	679	chemical synaptic transmission	0.230765	0.0537242
GO:0099537	0.00292522	4.84987	1.46314	6	689	trans-synaptic signaling	0.224115	0.0537242
GO:0099536	0.00325601	4.74069	1.49499	6	704	synaptic signaling	0.214666	0.0537242
GO:0008610	0.00462427	4.396	1.60542	6	756	lipid biosynthetic process	0.186151	0.0678227
GO:0044255	0.00656616	3.64391	2.29345	7	1080	cellular lipid metabolic process	0.106416	0.0866734
GO:0055085	0.0107833	3.05338	3.15986	8	1488	transmembrane transport	0.0640681	0.129399
GO:0034220	0.0134397	3.14306	2.62685	7	1237	ion transmembrane transport	0.0811178	0.14118
GO:1905114	0.0139041	3.90986	1.45464	5	685	cell surface receptor signaling pathway involved in cell-cell signaling	0.18895	0.14118
GO:0042592	0.0177375	2.6277	4.15794	9	1958	homeostatic process	0.041627	0.167239
GO:0007267	0.0205581	2.68614	3.54211	8	1668	cell-cell signaling	0.0509865	0.180912
GO:0006812	0.0236688	3.01837	2.28071	6	1074	cation transport	0.092236	0.187691
GO:0019637	0.025252	2.97041	2.31469	6	1090	organophosphate metabolic process	0.089548	0.187691
GO:0055082	0.0255942	3.31309	1.70098	5	801	cellular chemical homeostasis	0.138186	0.187691
GO:0006629	0.0291069	2.64997	3.06643	7	1444	lipid metabolic process	0.059528	0.202216
GO:0048878	0.0348807	2.73765	2.49519	6	1175	chemical homeostasis	0.0770608	0.230213
GO:0019725	0.0533771	2.67672	2.07685	5	978	cellular homeostasis	0.0926937	0.335513
GO:0006811	0.0600775	1.91175	7.65333	12	3604	ion transport	0.0163821	0.343807
GO:0003008	0.0621675	2.20545	3.61218	7	1701	system process	0.042899	0.343807
GO:0051241	0.0625103	2.55021	2.17241	5	1023	negative regulation of multicellular organismal process	0.0847181	0.343807
GO:0032501	0.124711	1.60071	14.2619	18	6716	multicellular organismal process	0.00707634	0.658477
GO:0071702	0.130492	1.69672	6.00332	9	2827	organic substance transport	0.0199686	0.662495
GO:0043269	0.141452	1.94374	2.78824	5	1313	regulation of ion transport	0.0514278	0.691542
GO:0006820	0.155972	1.6169	6.24116	9	2939	anion transport	0.0184757	0.700093
GO:0006810	0.156314	1.52765	10.8026	14	5087	transport	0.00959317	0.700093
GO:0006952	0.160753	1.85484	2.90928	5	1370	defense response	0.0472375	0.700093
GO:0006950	0.164416	1.54515	8.10777	11	3818	response to stress	0.0133807	0.700093
GO:0051234	0.180595	1.47481	11.0553	14	5206	establishment of localization	0.00915962	0.739232
GO:1901565	0.184808	1.75939	3.05156	5	1437	organonitrogen compound catabolic process	0.0429353	0.739232
GO:0010648	0.199815	1.70655	3.13651	5	1477	negative regulation of cell communication	0.0406412	0.756464
GO:0023057	0.200578	1.70398	3.14075	5	1479	negative regulation of signaling	0.0405314	0.756464
GO:1901575	0.217352	1.53013	4.95428	7	2333	organic substance catabolic process	0.0228048	0.796958
GO:0065008	0.229476	1.40955	8.67476	11	4085	regulation of biological quality	0.0116887	0.818671
GO:0007399	0.274936	1.40617	5.31741	7	2504	nervous system development	0.0197964	0.955041
GO:0048856	0.296562	1.286	12.064	14	5681	anatomical structure development	0.00769195	0.99602
GO:0007275	0.302137	1.28187	11.1402	13	5246	multicellular organism development	0.00837615	0.99602
GO:0051049	0.315549	1.40331	3.73323	5	1758	regulation of transport	0.0286873	0.99602
GO:0050896	0.318029	1.26549	17.1542	19	8078	response to stimulus	0.00516302	0.99602
GO:1901700	0.324706	1.3845	3.77782	5	1779	response to oxygen-containing compound	0.028014	0.99602
GO:0048519	0.34603	1.22601	11.4651	13	5399	negative regulation of biological process	0.00790814	0.99602
GO:0006796	0.349616	1.26041	6.6956	8	3153	phosphate-containing compound metabolic process	0.0142692	0.99602
GO:0006793	0.361227	1.24386	6.76568	8	3186	phosphorus metabolic process	0.0139751	0.99602
GO:0009058	0.385149	1.17896	12.7223	14	5991	biosynthetic process	0.00691651	0.99602
GO:0009056	0.386488	1.22316	5.96297	7	2808	catabolic process	0.0157421	0.99602
GO:0002376	0.412258	1.18754	6.10737	7	2876	immune system process	0.0150065	0.99602
GO:0032502	0.419919	1.14171	12.9686	14	6107	developmental process	0.00665625	0.99602
GO:0048731	0.431797	1.13476	10.1082	11	4760	system development	0.00860868	0.99602
GO:0051179	0.432049	1.12916	14.0389	15	6611	localization	0.00608576	0.99602
GO:0048513	0.46719	1.10948	7.39425	8	3482	animal organ development	0.0117001	0.99602
GO:0051649	0.468422	1.11555	6.42166	7	3024	establishment of localization in cell	0.0135735	0.99602
GO:0009605	0.483156	1.10696	5.52127	6	2600	response to external stimulus	0.0157385	0.99602
GO:0023052	0.49333	1.06881	12.4908	13	5882	signaling	0.00666271	0.99602
GO:0010646	0.495091	1.0778	7.55989	8	3560	regulation of cell communication	0.011193	0.99602
GO:1901576	0.505095	1.05753	12.5715	13	5920	organic substance biosynthetic process	0.00657745	0.99602
GO:0023051	0.510369	1.06092	7.6512	8	3603	regulation of signaling	0.0109275	0.99602
GO:0051239	0.519372	1.06162	5.71451	6	2691	regulation of multicellular organismal process	0.014692	0.99602
GO:0032879	0.574975	0.99584	6.02031	6	2835	regulation of localization	0.0132374	0.99602
GO:0010033	0.584294	0.983613	7.09058	7	3339	response to organic substance	0.0111333	0.99602
GO:0007166	0.611974	0.953962	6.23266	6	2935	cell surface receptor signaling pathway	0.0123507	0.99602
GO:0044248	0.612248	0.954189	5.20061	5	2449	cellular catabolic process	0.0147826	0.99602
GO:0071705	0.613412	0.952792	5.20698	5	2452	nitrogen compound transport	0.0147464	0.99602
GO:0048523	0.637823	0.932146	10.4883	10	4939	negative regulation of cellular process	0.00726908	0.99602
GO:0007154	0.643441	0.929964	12.5481	12	5909	cell communication	0.00609412	0.99602
GO:0009889	0.655121	0.911658	8.56646	8	4034	regulation of biosynthetic process	0.00871718	0.99602
GO:0030154	0.660704	0.906116	8.60469	8	4052	cell differentiation	0.0086399	0.99602
GO:0051128	0.666378	0.890377	5.50853	5	2594	regulation of cellular component organization	0.0131761	0.99602
GO:0009892	0.681672	0.877527	6.66162	6	3137	negative regulation of metabolic process	0.0108114	0.99602
GO:0009966	0.682651	0.876467	6.66799	6	3140	regulation of signal transduction	0.0107907	0.99602
GO:0048869	0.68377	0.883252	8.76608	8	4128	cellular developmental process	0.0083247	0.99602
GO:0048518	0.686861	0.89078	12.8773	12	6064	positive regulation of biological process	0.00578656	0.99602
GO:0042221	0.718986	0.848263	9.02515	8	4250	response to chemical	0.00785362	0.99602
GO:0051641	0.719714	0.842463	7.98036	7	3758	cellular localization	0.00878906	0.99602
GO:0044249	0.746391	0.833276	12.3485	11	5815	cellular biosynthetic process	0.00576834	0.99602
GO:0051716	0.752888	0.832369	14.4339	13	6797	cellular response to stimulus	0.00498961	0.99602
GO:0033036	0.753785	0.799233	7.16703	6	3375	macromolecule localization	0.00934031	0.99602
GO:0007165	0.762706	0.814014	11.463	10	5398	signal transduction	0.00608544	0.99602
GO:0065007	0.772894	0.81535	23.3443	22	10993	biological regulation	0.00322811	0.99602
GO:0048583	0.789195	0.76918	8.53673	7	4020	regulation of response to stimulus	0.00768075	0.99602
GO:0022607	0.80784	0.726016	6.50023	5	3061	cellular component assembly	0.0094624	0.99602
GO:0048522	0.809775	0.766644	11.9068	10	5607	positive regulation of cellular process	0.00564023	0.99602
GO:0009893	0.822608	0.721502	7.75101	6	3650	positive regulation of metabolic process	0.00798589	0.99602
GO:1901362	0.823045	0.731619	8.85314	7	4169	organic cyclic compound biosynthetic process	0.00714154	0.99602
GO:0080090	0.831134	0.743947	12.1319	10	5713	regulation of primary metabolic process	0.00543287	0.99602
GO:0050789	0.844517	0.741488	22.1424	20	10427	regulation of biological process	0.00326189	0.99602
GO:0031325	0.853165	0.66952	6.92919	5	3263	positive regulation of cellular metabolic process	0.0083271	0.99602
GO:1903506	0.859715	0.66095	6.99927	5	3296	regulation of nucleic acid-templated transcription	0.00816119	0.99602
GO:2001141	0.860299	0.660179	7.00564	5	3299	regulation of RNA biosynthetic process	0.00814635	0.99602
GO:0044085	0.860687	0.659666	7.00989	5	3301	cellular component biogenesis	0.00813648	0.99602
GO:0034654	0.879461	0.650408	8.37534	6	3944	nucleobase-containing compound biosynthetic process	0.00683967	0.99602
GO:0031326	0.881275	0.647954	8.3987	6	3955	regulation of cellular biosynthetic process	0.00680168	0.99602
GO:0006351	0.881969	0.630704	7.25834	5	3418	transcription, DNA-templated	0.00758898	0.99602
GO:0019222	0.885493	0.685545	13.8541	11	6524	regulation of metabolic process	0.00458271	0.99602
GO:0097659	0.88862	0.621253	7.34329	5	3458	nucleic acid-templated transcription	0.00741443	0.99602
GO:0018130	0.889565	0.636533	8.50912	6	4007	heterocycle biosynthetic process	0.00662629	0.99602
GO:0019438	0.890338	0.635451	8.51974	6	4012	aromatic compound biosynthetic process	0.00660978	0.99602
GO:0032774	0.890396	0.618692	7.36665	5	3469	RNA biosynthetic process	0.00736748	0.99602
GO:0044238	0.891071	0.688077	20.8385	18	9813	primary metabolic process	0.00331457	0.99602
GO:0051252	0.90537	0.596356	7.57688	5	3568	regulation of RNA metabolic process	0.00696431	0.99602
GO:0050794	0.9114	0.65948	21.1443	18	9957	regulation of cellular process	0.00321939	0.99602
GO:0009059	0.919747	0.605273	10.1145	7	4763	macromolecule biosynthetic process	0.00547135	0.99602
GO:1901360	0.923433	0.619526	12.3804	9	5830	organic cyclic compound metabolic process	0.0046953	0.99602
GO:0006139	0.932739	0.595048	11.4821	8	5407	nucleobase-containing compound metabolic process	0.00485216	0.99602
GO:0010556	0.933774	0.548964	8.0653	5	3798	regulation of macromolecule biosynthetic process	0.00614636	0.99602
GO:0031323	0.935093	0.60011	12.6225	9	5944	regulation of cellular metabolic process	0.00451692	0.99602
GO:0019219	0.937696	0.541682	8.146	5	3836	regulation of nucleobase-containing compound metabolic process	0.00602519	0.99602
GO:0051171	0.94194	0.578497	11.6902	8	5505	regulation of nitrogen compound metabolic process	0.00468094	0.99602
GO:0046483	0.947537	0.567679	11.8304	8	5571	heterocycle metabolic process	0.00457069	0.99602
GO:0008152	0.949999	0.58876	22.8028	19	10738	metabolic process	0.00292189	0.99602
GO:0006725	0.950243	0.562206	11.9026	8	5605	cellular aromatic compound metabolic process	0.0045154	0.99602
GO:0071704	0.950302	0.591486	21.9088	18	10317	organic substance metabolic process	0.00299863	0.99602
GO:0034645	0.960687	0.512129	9.93191	6	4677	cellular macromolecule biosynthetic process	0.00486378	0.99602
GO:0044271	0.960885	0.511652	9.93828	6	4680	cellular nitrogen compound biosynthetic process	0.00485755	0.99602
GO:0016043	0.965772	0.536193	13.491	9	6353	cellular component organization	0.00395405	0.99602
GO:0090304	0.971287	0.484121	10.3205	6	4860	nucleic acid metabolic process	0.00450439	0.99602
GO:0044237	0.971948	0.539905	21.6646	17	10202	cellular metabolic process	0.00289625	0.99602
GO:0060255	0.972743	0.507239	12.6798	8	5971	regulation of macromolecule metabolic process	0.00397881	0.99602
GO:0010467	0.973769	0.491977	11.5968	7	5461	gene expression	0.00416209	0.99602
GO:0071840	0.975002	0.509912	13.8839	9	6538	cellular component organization or biogenesis	0.00373345	0.99602
GO:0016070	0.975644	0.451156	9.30334	5	4381	RNA metabolic process	0.00461935	0.99602
GO:0019538	0.978105	0.477804	11.8134	7	5563	protein metabolic process	0.00401086	0.99602
GO:0034641	0.979395	0.485408	13.0175	8	6130	cellular nitrogen compound metabolic process	0.00377509	0.99602
GO:0010468	0.981472	0.430475	9.6155	5	4528	regulation of gene expression	0.00432429	0.99602
GO:0006807	0.988653	0.475485	19.8468	14	9346	nitrogen compound metabolic process	0.00284207	0.99602
GO:1901564	0.990251	0.435547	13.8605	8	6527	organonitrogen compound metabolic process	0.00332982	0.99602
GO:0044267	0.994352	0.359219	10.8727	5	5120	cellular protein metabolic process	0.00338211	0.99602
GO:0044260	0.994417	0.421175	16.5957	10	7815	cellular macromolecule metabolic process	0.00290335	0.99602
GO:0043170	0.99499	0.424668	18.7235	12	8817	macromolecule metabolic process	0.00273714	0.99602
GO:0009987	0.99602	0.241761	30.9255	28	14563	cellular process	0.00234107	0.99602

## Sheet: GOBP_dietDEG_f_DR_UP_220714
GOBPID	Pvalue	OddsRatio	ExpCount	Count	Size	Term	enrichment	padj
GO:0036503	3.9e-08	18.9881	0.509721	8	103	ERAD pathway	12.3865	1.13e-05
GO:0034976	2.47e-07	8.83127	1.49452	11	302	response to endoplasmic reticulum stress	1.98112	3.57e-05
GO:0030433	3.3e-06	17.043	0.410746	6	83	ubiquitin-dependent ERAD pathway	14.3063	0.000318106
GO:0035966	9.49e-06	8.77356	1.04913	8	212	response to topologically incorrect protein	2.92382	0.000660517
GO:0043413	1.37e-05	8.31808	1.10357	8	223	macromolecule glycosylation	2.64248	0.000660517
GO:0006486	1.37e-05	8.31808	1.10357	8	223	protein glycosylation	2.64248	0.000660517
GO:0070085	1.94e-05	7.90694	1.15801	8	234	glycosylation	2.39988	0.000801946
GO:0006487	3.61e-05	15.1723	0.376105	5	76	protein N-linked glycosylation	14.2192	0.00117292
GO:0010498	3.65e-05	5.09354	2.51396	11	508	proteasomal protein catabolic process	0.70016	0.00117292
GO:0006986	4.14e-05	8.43473	0.940262	7	190	response to unfolded protein	3.1851	0.00119776
GO:0051603	6.96e-05	4.11576	3.72146	13	752	proteolysis involved in cellular protein catabolic process	0.377607	0.00182762
GO:0009100	7.77e-05	5.65313	1.81619	9	367	glycoprotein metabolic process	1.0976	0.00187198
GO:0009101	0.000117755	6.04828	1.49452	8	302	glycoprotein biosynthetic process	1.44081	0.00261778
GO:0044257	0.000182876	3.71069	4.09756	13	828	cellular protein catabolic process	0.311469	0.00377508
GO:0035967	0.00019767	7.90341	0.846235	6	171	cellular response to topologically incorrect protein	3.37047	0.00380845
GO:0006511	0.000331953	3.9074	3.22658	11	652	ubiquitin-dependent protein catabolic process	0.42504	0.00572426
GO:0019941	0.000349722	3.88201	3.24638	11	656	modification-dependent protein catabolic process	0.419872	0.00572426
GO:0030163	0.000356528	3.28999	4.98834	14	1008	protein catabolic process	0.226328	0.00572426
GO:0043161	0.000394637	4.49818	2.25663	9	456	proteasome-mediated ubiquitin-dependent protein catabolic process	0.710959	0.00589458
GO:0043632	0.00040793	3.8077	3.30576	11	668	modification-dependent macromolecule catabolic process	0.404922	0.00589458
GO:0030968	0.000541238	8.25148	0.668081	5	135	endoplasmic reticulum unfolded protein response	4.50645	0.00744847
GO:0006457	0.000704192	6.15995	1.07388	6	217	protein folding	2.09297	0.00925053
GO:0006811	0.000836372	2.26891	16.6971	29	3374	ion transport	0.0418446	0.0105092
GO:0034620	0.000898725	7.33878	0.747261	5	151	cellular response to unfolded protein	3.60203	0.0108222
GO:1901137	0.00103893	3.60477	3.12761	10	632	carbohydrate derivative biosynthetic process	0.411242	0.011921
GO:1901565	0.00107248	2.72571	6.90845	16	1396	organonitrogen compound catabolic process	0.134859	0.011921
GO:0051234	0.00112254	2.14676	24.0806	37	4866	establishment of localization	0.0256678	0.0120153
GO:0006820	0.00126235	2.27552	13.7922	25	2787	anion transport	0.0528686	0.0130292
GO:0006810	0.00154786	2.09925	23.5313	36	4755	transport	0.0261537	0.0154253
GO:0071702	0.00179916	2.23172	13.3171	24	2691	organic substance transport	0.0544397	0.017332
GO:0045184	0.00518734	2.15816	10.3478	19	2091	establishment of protein localization	0.0713801	0.0483594
GO:0055085	0.00570876	2.38577	6.67586	14	1349	transmembrane transport	0.126368	0.0495302
GO:1903050	0.00579292	4.69265	1.14811	5	232	regulation of proteolysis involved in cellular protein catabolic process	1.5259	0.0495302
GO:0010243	0.00582708	2.54814	5.29021	12	1069	response to organonitrogen compound	0.172488	0.0495302
GO:1901135	0.00659271	2.50453	5.37434	12	1086	carbohydrate derivative metabolic process	0.16713	0.0544369
GO:0015031	0.00709345	2.12074	9.86285	18	1993	protein transport	0.0744371	0.0569446
GO:0044265	0.00747989	2.37541	6.16614	13	1246	cellular macromolecule catabolic process	0.137543	0.058424
GO:0006886	0.00793158	2.35654	6.21068	13	1255	intracellular protein transport	0.135578	0.0597484
GO:0071705	0.00806294	2.02672	11.5801	20	2340	nitrogen compound transport	0.0599971	0.0597484
GO:0015833	0.00861103	2.07417	10.0509	18	2031	peptide transport	0.0716778	0.0622147
GO:1901698	0.00907258	2.39317	5.60198	12	1132	response to nitrogen compound	0.153823	0.0639506
GO:0042886	0.00998848	2.03863	10.1994	18	2061	amide transport	0.0696063	0.0687303
GO:0043687	0.0105117	3.48222	1.85578	6	375	post-translational protein modification	0.700843	0.0706485
GO:1903362	0.0122911	3.87451	1.3807	5	279	regulation of cellular protein catabolic process	1.0551	0.0807304
GO:0006508	0.013429	2.08082	8.14563	15	1646	proteolysis	0.0909418	0.0862441
GO:0009057	0.0142596	2.11316	7.43796	14	1503	macromolecule catabolic process	0.101799	0.0895874
GO:0051179	0.0161683	1.72114	30.603	40	6184	localization	0.0171812	0.0990578
GO:0048193	0.0164525	3.1404	2.04878	6	414	Golgi vesicle transport	0.575019	0.0990578
GO:0006812	0.0190569	2.30523	4.74585	10	959	cation transport	0.178605	0.112397
GO:0042176	0.0200579	2.99649	2.14281	6	433	regulation of protein catabolic process	0.525663	0.115935
GO:1901575	0.0243817	1.82599	11.1891	18	2261	organic substance catabolic process	0.0578367	0.138163
GO:0016567	0.0256894	2.28697	4.26582	9	862	protein ubiquitination	0.198957	0.142774
GO:0046903	0.0266694	1.97666	7.26971	13	1469	secretion	0.0989536	0.145424
GO:0032940	0.0317748	1.9728	6.67091	12	1348	secretion by cell	0.108476	0.170054
GO:0061024	0.0333026	2.17532	4.46872	9	903	membrane organization	0.1813	0.172809
GO:0051649	0.0335339	1.69542	14.1584	21	2861	establishment of localization in cell	0.042142	0.172809
GO:0033036	0.0342005	1.66441	15.9399	23	3221	macromolecule localization	0.0364148	0.172809
GO:0065008	0.0346814	1.63171	18.6469	26	3768	regulation of biological quality	0.0300804	0.172809
GO:0001501	0.0366948	2.58278	2.46942	6	499	skeletal system development	0.395806	0.179742
GO:0140352	0.0385932	1.90943	6.86886	12	1388	export from cell	0.102314	0.185891
GO:0046907	0.0403342	1.78002	9.32838	15	1885	intracellular transport	0.0693426	0.18792
GO:0009306	0.0409652	2.78734	1.89537	5	383	protein secretion	0.559892	0.18792
GO:0035592	0.0409652	2.78734	1.89537	5	383	establishment of protein localization to extracellular region	0.559892	0.18792
GO:0071692	0.0429166	2.74995	1.92011	5	388	protein localization to extracellular region	0.545555	0.193795
GO:0034220	0.0461889	1.96204	5.503	10	1112	ion transmembrane transport	0.132838	0.205363
GO:0032446	0.0478828	2.02241	4.78049	9	966	protein modification by small protein conjugation	0.158424	0.209669
GO:0008104	0.0507545	1.61864	13.901	20	2809	protein localization	0.041635	0.218926
GO:0002790	0.0548782	2.55736	2.05868	5	416	peptide secretion	0.474586	0.233232
GO:0030001	0.0640003	2.44097	2.1527	5	435	metal ion transport	0.434034	0.268059
GO:0072594	0.0788782	2.10547	2.99894	6	606	establishment of protein localization to organelle	0.268372	0.3108
GO:0006605	0.0789203	2.28703	2.29127	5	463	protein targeting	0.383124	0.3108
GO:0010033	0.0789448	1.50729	15.5242	21	3137	response to organic substance	0.0350527	0.3108
GO:0034613	0.0796127	1.59431	10.2489	15	2071	cellular protein localization	0.0574464	0.3108
GO:0005975	0.0808376	2.0909	3.01873	6	610	carbohydrate metabolic process	0.264864	0.3108
GO:0006464	0.0823108	1.46654	19.2605	25	3892	cellular protein modification process	0.0271098	0.3108
GO:0036211	0.0823108	1.46654	19.2605	25	3892	protein modification process	0.0271098	0.3108
GO:0070727	0.0828084	1.58348	10.3082	15	2083	cellular macromolecule localization	0.0567864	0.3108
GO:0010817	0.0870318	2.21692	2.36055	5	477	regulation of hormone levels	0.360965	0.322464
GO:0033554	0.0905943	1.55868	10.4468	15	2111	cellular response to stress	0.05529	0.327278
GO:0051641	0.0905961	1.45964	17.6027	23	3557	cellular localization	0.0298601	0.327278
GO:0010876	0.097453	2.13717	2.44468	5	494	lipid localization	0.336549	0.347703
GO:0009056	0.111404	1.45833	13.4507	18	2718	catabolic process	0.0400226	0.39263
GO:0044248	0.11712	1.47156	11.7533	16	2375	cellular catabolic process	0.0465934	0.407804
GO:0070647	0.120184	1.64731	5.77024	9	1166	protein modification by small protein conjugation or removal	0.108737	0.41349
GO:0098655	0.126947	1.82976	3.42453	6	692	cation transmembrane transport	0.205812	0.427698
GO:0043412	0.127273	1.37422	20.176	25	4077	macromolecule modification	0.0247053	0.427698
GO:1901566	0.141078	1.49011	8.55143	12	1728	organonitrogen compound biosynthetic process	0.0660124	0.468637
GO:0098916	0.145054	1.86687	2.78119	5	562	anterograde trans-synaptic signaling	0.260033	0.470542
GO:0007268	0.145054	1.86687	2.78119	5	562	chemical synaptic transmission	0.260033	0.470542
GO:0044267	0.146536	1.33065	24.3181	29	4914	cellular protein metabolic process	0.0197269	0.470542
GO:0019538	0.149654	1.32243	26.3026	31	5315	protein metabolic process	0.0180255	0.474823
GO:0099537	0.152012	1.83596	2.82573	5	571	trans-synaptic signaling	0.251901	0.474823
GO:0042221	0.152798	1.33831	19.6564	24	3972	response to chemical	0.0249876	0.474823
GO:0099536	0.162311	1.79301	2.89007	5	584	synaptic signaling	0.240811	0.499019
GO:0006950	0.165885	1.32915	17.9689	22	3631	response to stress	0.0274096	0.504639
GO:0031400	0.171245	1.75815	2.9445	5	595	negative regulation of protein modification process	0.231989	0.514979
GO:0009894	0.172847	1.5402	5.42382	8	1096	regulation of catabolic process	0.109396	0.514979
GO:0098662	0.177864	1.7336	2.98409	5	603	inorganic cation transmembrane transport	0.225874	0.524516
GO:0051223	0.182893	1.71561	3.01379	5	609	regulation of protein transport	0.221446	0.533899
GO:1901564	0.190619	1.2687	30.8752	35	6239	organonitrogen compound metabolic process	0.0147696	0.55089
GO:0007267	0.196713	1.42158	7.35878	10	1487	cell-cell signaling	0.0742865	0.562872
GO:0070201	0.202656	1.64986	3.12761	5	632	regulation of establishment of protein localization	0.205621	0.572519
GO:0010564	0.204046	1.56604	3.96394	6	801	regulation of cell cycle process	0.153609	0.572519
GO:0090087	0.208816	1.63079	3.16225	5	639	regulation of peptide transport	0.201141	0.578835
GO:0051345	0.210303	1.5495	4.00353	6	809	positive regulation of hydrolase activity	0.150586	0.578835
GO:0045055	0.220619	1.52332	4.06787	6	822	regulated exocytosis	0.145861	0.601499
GO:0098660	0.234977	1.5561	3.30576	5	668	inorganic ion transmembrane transport	0.184056	0.634657
GO:0016192	0.24177	1.29764	10.4765	13	2117	vesicle-mediated transport	0.0476468	0.643113
GO:0044070	0.244242	1.46783	4.21138	6	851	regulation of anion transport	0.136089	0.643113
GO:0033365	0.245029	1.42061	5.08731	7	1028	protein localization to organelle	0.108804	0.643113
GO:0043009	0.247009	1.52469	3.3701	5	681	chordate embryonic development	0.177096	0.643113
GO:0016071	0.25173	1.45137	4.25592	6	860	mRNA metabolic process	0.133256	0.649552
GO:0045087	0.25732	1.49905	3.42453	5	692	innate immune response	0.17151	0.658101
GO:0009792	0.260151	1.4922	3.43938	5	695	embryo development ending in birth or egg hatching	0.170033	0.659506
GO:0030162	0.273465	1.46099	3.50866	5	709	regulation of proteolysis	0.163384	0.68723
GO:0051640	0.278258	1.45015	3.5334	5	714	organelle localization	0.161104	0.693247
GO:0042592	0.293967	1.25382	9.07105	11	1833	homeostatic process	0.0537774	0.726125
GO:0050896	0.301824	1.16789	37.3284	40	7543	response to stimulus	0.0115479	0.733758
GO:0044093	0.302136	1.24362	9.13538	11	1846	positive regulation of molecular function	0.0530226	0.733758
GO:0031329	0.312874	1.33277	4.60728	6	931	regulation of cellular catabolic process	0.113706	0.753506
GO:0009987	0.315694	2.39418	67.6592	69	13672	cellular process	0.00606341	0.754013
GO:0006887	0.319946	1.32054	4.64687	6	939	exocytosis	0.111777	0.757905
GO:0010647	0.345967	1.20276	8.52669	10	1723	positive regulation of cell communication	0.0553301	0.808986
GO:0023056	0.350765	1.19719	8.56133	10	1730	positive regulation of signaling	0.0548832	0.808986
GO:0007417	0.351172	1.2694	4.82008	6	974	central nervous system development	0.103888	0.808986
GO:0065009	0.35657	1.15024	14.3464	16	2899	regulation of molecular function	0.031272	0.808986
GO:0050790	0.357676	1.16459	11.4712	13	2318	regulation of catalytic activity	0.0397419	0.808986
GO:0044419	0.358305	1.17888	9.56592	11	1933	biological process involved in interspecies interaction between organisms	0.0483572	0.808986
GO:0009967	0.373815	1.18193	7.77448	9	1571	positive regulation of signal transduction	0.0598993	0.830336
GO:0019752	0.376381	1.23108	4.95864	6	1002	carboxylic acid metabolic process	0.098163	0.830336
GO:0032269	0.376381	1.23108	4.95864	6	1002	negative regulation of cellular protein metabolic process	0.098163	0.830336
GO:0043269	0.389864	1.19104	5.97808	7	1208	regulation of ion transport	0.0787945	0.853566
GO:0051049	0.401671	1.15036	7.96253	9	1609	regulation of transport	0.0571034	0.862514
GO:0043436	0.401676	1.19485	5.09721	6	1030	oxoacid metabolic process	0.0928985	0.862514
GO:0051716	0.402904	1.09095	31.4938	33	6364	cellular response to stimulus	0.013384	0.862514
GO:0098542	0.408715	1.21046	4.18664	5	846	defense response to other organism	0.114752	0.86852
GO:0051248	0.418837	1.17138	5.19123	6	1049	negative regulation of protein metabolic process	0.0895637	0.883531
GO:1901700	0.431849	1.11793	8.16543	9	1650	response to oxygen-containing compound	0.0543008	0.893559
GO:0000165	0.43356	1.1733	4.31036	5	871	MAPK cascade	0.108259	0.893559
GO:0044281	0.433606	1.10894	9.15023	10	1849	small molecule metabolic process	0.0480461	0.893559
GO:0006082	0.435958	1.14875	5.28526	6	1068	organic acid metabolic process	0.0864053	0.893559
GO:0051336	0.443178	1.12516	6.2948	7	1272	regulation of hydrolase activity	0.071065	0.90196
GO:0051726	0.462237	1.10309	6.40862	7	1295	regulation of cell cycle	0.0685631	0.934172
GO:0051240	0.47049	1.09373	6.45811	7	1305	positive regulation of multicellular organismal process	0.0675163	0.944246
GO:0006807	0.476815	1.04951	44.222	45	8936	nitrogen compound metabolic process	0.00925674	0.944343
GO:0018193	0.477073	1.08635	6.4977	7	1313	peptidyl-amino acid modification	0.0666961	0.944343
GO:0043085	0.482298	1.07291	7.51714	8	1519	positive regulation of catalytic activity	0.0569516	0.948191
GO:0044238	0.4913	1.04224	46.3598	47	9368	primary metabolic process	0.00879703	0.959363
GO:0032880	0.502817	1.07856	4.66172	5	942	regulation of protein localization	0.092555	0.975263
GO:0043207	0.513051	1.05467	5.7158	6	1155	response to external biotic stimulus	0.0738787	0.981932
GO:0051707	0.513051	1.05467	5.7158	6	1155	response to other organism	0.0738787	0.981932
GO:0071310	0.519417	1.02294	12.7628	13	2579	cellular response to organic substance	0.032105	0.987576
GO:0009607	0.549004	1.01417	5.92365	6	1197	response to biotic stimulus	0.0687852	0.99999
GO:0065007	0.552626	1.00599	50.9176	51	10289	biological regulation	0.00791326	0.99999
GO:0032268	0.555253	0.995444	12.0452	12	2434	regulation of cellular protein metabolic process	0.0332715	0.99999
GO:0051130	0.55824	1.00403	5.97808	6	1208	positive regulation of cellular component organization	0.0675382	0.99999
GO:0022603	0.576903	0.987671	5.05762	5	1022	regulation of anatomical structure morphogenesis	0.0786321	0.99999
GO:0009628	0.583002	0.977298	6.12655	6	1238	response to abiotic stimulus	0.0643046	0.99999
GO:0016032	0.588421	0.974235	5.12195	5	1035	viral process	0.0766692	0.99999
GO:0031325	0.590051	0.968746	15.3758	15	3107	positive regulation of cellular metabolic process	0.0255235	0.99999
GO:0034622	0.592809	0.969156	5.14669	5	1040	cellular protein-containing complex assembly	0.0759338	0.99999
GO:0009790	0.595429	0.966133	5.16154	5	1043	embryo development	0.0754976	0.99999
GO:0044087	0.595429	0.966133	5.16154	5	1043	regulation of cellular component biogenesis	0.0754976	0.99999
GO:0048584	0.597652	0.961138	10.3429	10	2090	positive regulation of response to stimulus	0.0376044	0.99999
GO:0031399	0.599443	0.959122	8.29905	8	1677	regulation of protein modification process	0.0467257	0.99999
GO:0032270	0.603084	0.955662	7.2895	7	1473	positive regulation of cellular protein metabolic process	0.0529937	0.99999
GO:0043170	0.610205	0.963927	41.6189	41	8410	macromolecule metabolic process	0.0095219	0.99999
GO:0051338	0.621977	0.935885	5.31495	5	1074	regulation of transferase activity	0.0712022	0.99999
GO:0071704	0.623944	0.956887	48.6561	48	9832	organic substance metabolic process	0.00815623	0.99999
GO:0006952	0.624288	0.933922	6.38388	6	1290	defense response	0.0592248	0.99999
GO:0008152	0.628231	0.954496	50.6554	50	10236	metabolic process	0.00783865	0.99999
GO:0044403	0.630327	0.926499	5.36444	5	1084	biological process involved in symbiotic interaction	0.0698945	0.99999
GO:0048878	0.631985	0.924642	5.37434	5	1086	chemical homeostasis	0.0696373	0.99999
GO:0051246	0.637226	0.931075	12.7232	12	2571	regulation of protein metabolic process	0.0298201	0.99999
GO:0023052	0.637692	0.942752	26.9657	26	5449	signaling	0.0143837	0.99999
GO:0007154	0.649948	0.935154	27.0993	26	5476	cell communication	0.0142422	0.99999
GO:0048522	0.65202	0.933295	26.1145	25	5277	positive regulation of cellular process	0.0147468	0.99999
GO:0006955	0.653212	0.909943	8.69	8	1756	immune response	0.042616	0.99999
GO:0051247	0.658864	0.90177	7.6755	7	1551	positive regulation of protein metabolic process	0.0477976	0.99999
GO:0080134	0.669044	0.888044	6.68081	6	1350	regulation of response to stress	0.0540774	0.99999
GO:0032879	0.669153	0.90628	13.0053	12	2628	regulation of localization	0.0285406	0.99999
GO:0009893	0.675345	0.909013	17.2018	16	3476	positive regulation of metabolic process	0.0217517	0.99999
GO:0022402	0.697027	0.859669	6.87876	6	1390	cell cycle process	0.0510098	0.99999
GO:0070887	0.697075	0.889492	15.351	14	3102	cellular response to chemical stimulus	0.0238988	0.99999
GO:0010646	0.700555	0.889088	16.4249	15	3319	regulation of cell communication	0.022367	0.99999
GO:0009888	0.706998	0.861223	9.11559	8	1842	tissue development	0.0387296	0.99999
GO:0051173	0.710367	0.876951	14.4404	13	2918	positive regulation of nitrogen compound metabolic process	0.0250787	0.99999
GO:0065003	0.714251	0.848919	8.09615	7	1636	protein-containing complex assembly	0.0429599	0.99999
GO:0023051	0.719941	0.874847	16.6278	15	3360	regulation of signaling	0.0218245	0.99999
GO:0044260	0.72186	0.894092	36.9473	35	7466	cellular macromolecule metabolic process	0.0103139	0.99999
GO:0007165	0.724653	0.884893	24.9169	23	5035	signal transduction	0.0149026	0.99999
GO:0048513	0.740735	0.856525	15.8063	14	3194	animal organ development	0.0225419	0.99999
GO:0007049	0.759024	0.813432	9.57582	8	1935	cell cycle	0.0350962	0.99999
GO:0044237	0.763366	0.863903	48.2404	46	9748	cellular metabolic process	0.00795168	0.99999
GO:0033043	0.768593	0.77492	6.3146	5	1276	regulation of organelle organization	0.050443	0.99999
GO:0048518	0.817365	0.822077	28.2128	25	5701	positive regulation of biological process	0.0126348	0.99999
GO:0009966	0.821851	0.78125	14.6433	12	2959	regulation of signal transduction	0.0225125	0.99999
GO:0007166	0.823002	0.774435	13.5695	11	2742	cell surface receptor signaling pathway	0.024032	0.99999
GO:0001775	0.825591	0.71049	6.82927	5	1380	cell activation	0.0431264	0.99999
GO:0048585	0.82563	0.725835	7.99717	6	1616	negative regulation of response to stimulus	0.0377399	0.99999
GO:0009891	0.828668	0.735149	9.17992	7	1855	positive regulation of biosynthetic process	0.033415	0.99999
GO:0006996	0.843091	0.780206	19.2506	16	3890	organelle organization	0.0173681	0.99999
GO:0043933	0.849541	0.712422	9.43231	7	1906	protein-containing complex subunit organization	0.0316508	0.99999
GO:0045893	0.85181	0.679147	7.11135	5	1437	positive regulation of transcription, DNA-templated	0.039773	0.99999
GO:0042981	0.85395	0.676516	7.13609	5	1442	regulation of apoptotic process	0.0394977	0.99999
GO:0043067	0.866272	0.661108	7.28455	5	1472	regulation of programmed cell death	0.0379041	0.99999
GO:0009605	0.867961	0.713778	11.976	9	2420	response to external stimulus	0.0252432	0.99999
GO:0051128	0.874637	0.70634	12.0799	9	2441	regulation of cellular component organization	0.0248107	0.99999
GO:0010557	0.875397	0.667664	8.60587	6	1739	positive regulation of macromolecule biosynthetic process	0.03259	0.99999
GO:0003008	0.876993	0.647286	7.42312	5	1500	system process	0.0365022	0.99999
GO:0050794	0.879142	0.774319	46.147	42	9325	regulation of cellular process	0.00793384	0.99999
GO:0031324	0.880148	0.700067	12.169	9	2459	negative regulation of cellular metabolic process	0.0244488	0.99999
GO:0009058	0.881388	0.76659	28.3266	24	5724	biosynthetic process	0.0120322	0.99999
GO:1903508	0.882794	0.639617	7.5023	5	1516	positive regulation of nucleic acid-templated transcription	0.0357358	0.99999
GO:1902680	0.883149	0.639143	7.50725	5	1517	positive regulation of RNA biosynthetic process	0.0356887	0.99999
GO:0045935	0.886262	0.65386	8.76423	6	1771	positive regulation of nucleobase-containing compound metabolic process	0.0314229	0.99999
GO:0051172	0.891516	0.675633	11.2089	8	2265	negative regulation of nitrogen compound metabolic process	0.0256145	0.99999
GO:0007399	0.893516	0.673145	11.2435	8	2272	nervous system development	0.0254569	0.99999
GO:0010604	0.895039	0.707698	15.8162	12	3196	positive regulation of macromolecule metabolic process	0.0192974	0.99999
GO:0042127	0.899786	0.616222	7.75468	5	1567	regulation of cell population proliferation	0.0334475	0.99999
GO:0010605	0.899955	0.686054	13.6635	10	2761	negative regulation of macromolecule metabolic process	0.0215476	0.99999
GO:0009892	0.902466	0.691496	14.8462	11	3000	negative regulation of metabolic process	0.0200762	0.99999
GO:0031328	0.904252	0.629677	9.0562	6	1830	positive regulation of cellular biosynthetic process	0.0294294	0.99999
GO:0048731	0.908964	0.718284	21.5864	17	4362	system development	0.0146761	0.99999
GO:0010941	0.909348	0.602307	7.91304	5	1599	regulation of cell death	0.0321222	0.99999
GO:0007275	0.909811	0.724674	23.7441	19	4798	multicellular organism development	0.013557	0.99999
GO:0006793	0.909945	0.682196	15.0046	11	3032	phosphorus metabolic process	0.0196547	0.99999
GO:1901576	0.911461	0.733608	27.9852	23	5655	organic substance biosynthetic process	0.0118139	0.99999
GO:0051254	0.911893	0.598493	7.95758	5	1608	positive regulation of RNA metabolic process	0.0317636	0.99999
GO:0006915	0.911921	0.61874	9.19477	6	1858	apoptotic process	0.028549	0.99999
GO:0016310	0.917746	0.62692	10.521	7	2126	phosphorylation	0.0254392	0.99999
GO:0032501	0.925516	0.72088	30.4397	25	6151	multicellular organismal process	0.0108538	0.99999
GO:0048583	0.925628	0.682613	18.7409	14	3787	regulation of response to stimulus	0.016035	0.99999
GO:0012501	0.929296	0.592077	9.55108	6	1930	programmed cell death	0.0264587	0.99999
GO:0044249	0.930257	0.708431	27.4705	22	5551	cellular biosynthetic process	0.0117277	0.99999
GO:0016043	0.93112	0.711837	29.5786	24	5977	cellular component organization	0.0110351	0.99999
GO:0002376	0.939946	0.619313	13.4457	9	2717	immune system process	0.020026	0.99999
GO:0048856	0.941853	0.686453	25.7434	20	5202	anatomical structure development	0.0121401	0.99999
GO:0009059	0.942546	0.673875	22.5465	17	4556	macromolecule biosynthetic process	0.0134528	0.99999
GO:0035556	0.942954	0.614249	13.5348	9	2735	intracellular signal transduction	0.0197633	0.99999
GO:0080090	0.946458	0.682525	26.9707	21	5450	regulation of primary metabolic process	0.0116134	0.99999
GO:0006796	0.947379	0.617631	14.8512	10	3001	phosphate-containing compound metabolic process	0.018239	0.99999
GO:1902531	0.952004	0.528948	8.86815	5	1792	regulation of intracellular signal transduction	0.0255756	0.99999
GO:0008219	0.955099	0.544939	10.2538	6	2072	cell death	0.0229564	0.99999
GO:0071840	0.95569	0.674852	30.4892	24	6161	cellular component organization or biogenesis	0.0103858	0.99999
GO:0048523	0.955779	0.651805	23.0562	17	4659	negative regulation of cellular process	0.0128646	0.99999
GO:0050789	0.959007	0.671621	48.3195	42	9764	regulation of biological process	0.00723645	0.99999
GO:0034645	0.959515	0.639814	22.1258	16	4471	cellular macromolecule biosynthetic process	0.0131475	0.99999
GO:0008283	0.959629	0.512458	9.11559	5	1842	cell population proliferation	0.024206	0.99999
GO:0022607	0.963286	0.574768	14.2722	9	2884	cellular component assembly	0.0177739	0.99999
GO:0050793	0.963696	0.544608	11.8374	7	2392	regulation of developmental process	0.0200959	0.99999
GO:0032502	0.964579	0.650138	27.7773	21	5613	developmental process	0.0109487	0.99999
GO:0031323	0.969399	0.639632	28.0495	21	5668	regulation of cellular metabolic process	0.0107372	0.99999
GO:0051171	0.970315	0.63044	25.9661	19	5247	regulation of nitrogen compound metabolic process	0.0113361	0.99999
GO:0051239	0.97266	0.521786	12.263	7	2478	regulation of multicellular organismal process	0.0187252	0.99999
GO:0048519	0.975147	0.614058	25.199	18	5092	negative regulation of biological process	0.0114032	0.99999
GO:0048468	0.978105	0.462535	9.95688	5	2012	cell development	0.0202883	0.99999
GO:0044085	0.982812	0.519545	15.45	9	3122	cellular component biogenesis	0.0151673	0.99999
GO:0009653	0.985112	0.479704	13.134	7	2654	anatomical structure morphogenesis	0.0163241	0.99999
GO:0030154	0.988033	0.520687	18.4192	11	3722	cell differentiation	0.0130428	0.99999
GO:0019222	0.988353	0.582997	30.7663	22	6217	regulation of metabolic process	0.00934959	0.99999
GO:0048869	0.990734	0.506496	18.7953	11	3798	cellular developmental process	0.0125261	0.99999
GO:0006725	0.994832	0.522155	26.5896	17	5373	cellular aromatic compound metabolic process	0.00967269	0.99999
GO:0006139	0.995525	0.51004	25.6741	16	5188	nucleobase-containing compound metabolic process	0.00976454	0.99999
GO:0034641	0.995959	0.520591	29.1481	19	5890	cellular nitrogen compound metabolic process	0.00899611	0.99999
GO:0046483	0.997444	0.486284	26.451	16	5345	heterocycle metabolic process	0.00919933	0.99999
GO:1901360	0.997585	0.489625	27.6536	17	5588	organic cyclic compound metabolic process	0.00894269	0.99999
GO:0090304	0.997639	0.462123	23.0809	13	4664	nucleic acid metabolic process	0.00981653	0.99999
GO:0060255	0.998341	0.475194	28.1534	17	5689	regulation of macromolecule metabolic process	0.00862797	0.99999
GO:0006355	0.999135	0.333975	15.2966	6	3091	regulation of transcription, DNA-templated	0.0103154	0.99999
GO:0019219	0.999157	0.36881	18.0926	8	3656	regulation of nucleobase-containing compound metabolic process	0.00983127	0.99999
GO:0016070	0.999219	0.393065	20.7897	10	4201	RNA metabolic process	0.00930736	0.99999
GO:1903506	0.999301	0.327422	15.5341	6	3139	regulation of nucleic acid-templated transcription	0.0100023	0.99999
GO:2001141	0.99931	0.327019	15.549	6	3142	regulation of RNA biosynthetic process	0.00998322	0.99999
GO:0034654	0.999473	0.354366	18.632	8	3765	nucleobase-containing compound biosynthetic process	0.00927026	0.99999
GO:0006351	0.999591	0.31201	16.123	6	3258	transcription, DNA-templated	0.00928498	0.99999
GO:0019438	0.999595	0.346768	18.929	8	3825	aromatic compound biosynthetic process	0.00898171	0.99999
GO:0018130	0.999597	0.346643	18.9339	8	3826	heterocycle biosynthetic process	0.00897701	0.99999
GO:2000112	0.999603	0.330042	17.5779	7	3552	regulation of cellular macromolecule biosynthetic process	0.00911347	0.99999
GO:0009889	0.999634	0.343918	19.0428	8	3848	regulation of biosynthetic process	0.00887466	0.99999
GO:0097659	0.999658	0.307201	16.316	6	3297	nucleic acid-templated transcription	0.00906662	0.99999
GO:0032774	0.999675	0.305866	16.3704	6	3308	RNA biosynthetic process	0.00900642	0.99999
GO:0010556	0.999713	0.321261	17.9343	7	3624	regulation of macromolecule biosynthetic process	0.00875495	0.99999
GO:0010467	0.999758	0.387715	25.8621	13	5226	gene expression	0.00781873	0.99999
GO:0044271	0.999769	0.357659	22.1902	10	4484	cellular nitrogen compound biosynthetic process	0.0081696	0.99999
GO:0051252	0.999787	0.295148	16.8208	6	3399	regulation of RNA metabolic process	0.00853062	0.99999
GO:1901362	0.999792	0.329008	19.6614	8	3973	organic cyclic compound biosynthetic process	0.00832501	0.99999
GO:0031326	0.999854	0.304485	18.6568	7	3770	regulation of cellular biosynthetic process	0.00808997	0.99999
GO:0010468	0.99999	0.251993	21.3489	7	4314	regulation of gene expression	0.00617831	0.99999

## Sheet: GOBP_dietDEG_f_AL_UP_220714
GOBPID	Pvalue	OddsRatio	ExpCount	Count	Size	Term	enrichment	padj
GO:0019752	4.45e-07	3.54602	8.78388	26	1002	carboxylic acid metabolic process	0.425373	0.000162287
GO:0043436	7.53e-07	3.43973	9.02934	26	1030	oxoacid metabolic process	0.40256	0.000162287
GO:0032787	9.29e-07	4.07406	5.71566	20	652	monocarboxylic acid metabolic process	0.772799	0.000162287
GO:0006082	1.49e-06	3.30461	9.36246	26	1068	organic acid metabolic process	0.374423	0.000195349
GO:0016053	2.35e-06	5.58462	2.63867	13	301	organic acid biosynthetic process	2.35691	0.000245866
GO:0008610	4.24e-06	3.65962	6.31177	20	720	lipid biosynthetic process	0.633719	0.000348742
GO:0044273	4.66e-06	16.1522	0.438317	6	50	sulfur compound catabolic process	39.4224	0.000348742
GO:0034308	8.02e-06	10.9778	0.727607	7	83	primary alcohol metabolic process	16.6907	0.000480482
GO:0044283	8.25e-06	3.61147	6.03125	19	688	small molecule biosynthetic process	0.659339	0.000480482
GO:0046394	1.08e-05	5.20116	2.58607	12	295	carboxylic acid biosynthetic process	2.265	0.000563743
GO:0044281	1.51e-05	2.54058	16.209	34	1849	small molecule metabolic process	0.163357	0.000709956
GO:1901615	1.63e-05	3.8774	4.6637	16	532	organic hydroxy compound metabolic process	0.9286	0.000709956
GO:0042445	3.91e-05	6.08632	1.63931	9	187	hormone metabolic process	4.22757	0.00152074
GO:0006633	4.06e-05	6.98918	1.27112	8	145	fatty acid biosynthetic process	6.25008	0.00152074
GO:0044272	4.8e-05	5.91789	1.68314	9	192	sulfur compound biosynthetic process	4.01025	0.00167797
GO:0006790	7.38e-05	4.22211	3.14712	12	359	sulfur compound metabolic process	1.52941	0.00227904
GO:0072330	7.39e-05	5.5779	1.77957	9	203	monocarboxylic acid biosynthetic process	3.58742	0.00227904
GO:0044255	8.43e-05	2.77555	9.05564	22	1033	cellular lipid metabolic process	0.338652	0.00245353
GO:0043062	0.000103386	4.06577	3.26108	12	372	extracellular structure organization	1.42438	0.00258707
GO:0030198	0.000103386	4.06577	3.26108	12	372	extracellular matrix organization	1.42438	0.00258707
GO:0042493	0.00010368	3.81135	3.7783	13	431	response to drug	1.14953	0.00258707
GO:0045229	0.000108749	4.04272	3.27861	12	374	external encapsulating structure organization	1.40919	0.0025902
GO:0044282	0.000124555	3.73758	3.84843	13	439	small molecule catabolic process	1.10802	0.0028159
GO:0006629	0.000128973	2.4881	12.0713	26	1377	lipid metabolic process	0.225236	0.0028159
GO:0033559	0.000145858	8.33659	0.797738	6	91	unsaturated fatty acid metabolic process	11.9015	0.00305718
GO:0051604	0.00016647	4.50151	2.43704	10	278	protein maturation	2.12541	0.003355
GO:0120254	0.000174403	8.05065	0.824037	6	94	olefinic compound metabolic process	11.1539	0.00338471
GO:0016101	0.000207193	7.78357	0.850336	6	97	diterpenoid metabolic process	10.4747	0.00387747
GO:0001676	0.000219141	7.69842	0.859102	6	98	long-chain fatty acid metabolic process	10.262	0.00395966
GO:0006721	0.000287276	7.29897	0.902934	6	103	terpenoid metabolic process	9.28985	0.00501775
GO:1903510	0.000352924	7.00789	0.937999	6	107	mucopolysaccharide metabolic process	8.60826	0.00588313
GO:0008202	0.000359275	4.06739	2.6825	10	306	steroid metabolic process	1.75424	0.00588313
GO:0034754	0.000429779	6.73898	0.973065	6	111	cellular hormone metabolic process	7.99903	0.00682437
GO:0006631	0.000466722	3.64204	3.29615	11	376	fatty acid metabolic process	1.27805	0.00719302
GO:0003008	0.000498739	2.25834	13.1495	26	1500	system process	0.189812	0.00734764
GO:0042632	0.0005048	8.37395	0.657476	5	75	cholesterol homeostasis	14.6009	0.00734764
GO:0009063	0.000519121	6.48981	1.00813	6	115	cellular amino acid catabolic process	7.45225	0.00735188
GO:0055092	0.0005366	8.25541	0.666242	5	76	sterol homeostasis	14.2192	0.00739944
GO:0006720	0.000709613	6.09512	1.06949	6	122	isoprenoid metabolic process	6.62161	0.00953429
GO:0055088	0.00107074	5.60734	1.15716	6	132	lipid homeostasis	5.65634	0.0140267
GO:0001523	0.00110138	6.97129	0.780205	5	89	retinoid metabolic process	10.3686	0.0140762
GO:1901136	0.00137536	4.54931	1.65684	7	189	carbohydrate derivative catabolic process	3.21889	0.0171592
GO:1901605	0.00150563	4.47457	1.68314	7	192	alpha-amino acid metabolic process	3.11909	0.0183477
GO:0006066	0.00210358	3.18332	3.38381	10	386	alcohol metabolic process	1.10245	0.0250215
GO:0030203	0.00220044	4.83225	1.33248	6	152	glycosaminoglycan metabolic process	4.26575	0.0250215
GO:0046395	0.00220919	3.72306	2.30555	8	263	carboxylic acid catabolic process	1.89981	0.0250215
GO:0006520	0.00224429	3.39419	2.84906	9	325	cellular amino acid metabolic process	1.39961	0.0250215
GO:0007584	0.00263817	4.03219	1.85847	7	212	response to nutrient	2.55834	0.0288
GO:0006022	0.0028433	4.57858	1.40262	6	160	aminoglycan metabolic process	3.84984	0.0304059
GO:0010001	0.00292757	3.95387	1.89353	7	216	glial cell differentiation	2.46446	0.0306809
GO:0010817	0.00314059	2.83157	4.18155	11	477	regulation of hormone levels	0.794123	0.032268
GO:0016054	0.00324602	3.48605	2.45458	8	280	organic acid catabolic process	1.67612	0.0327099
GO:0042221	0.00379122	1.68171	34.8199	49	3972	response to chemical	0.0510164	0.037483
GO:0006694	0.00655245	3.82378	1.66561	6	190	steroid biosynthetic process	2.73008	0.063583
GO:0032501	0.0069626	1.58458	53.9218	68	6151	multicellular organismal process	0.0295222	0.0663346
GO:0051216	0.00723109	3.74135	1.70067	6	194	cartilage development	2.61866	0.0676623
GO:1901700	0.00842987	1.82952	14.4645	24	1650	response to oxygen-containing compound	0.144802	0.0774956
GO:0061448	0.008966	3.17903	2.33185	7	266	connective tissue development	1.62505	0.0797283
GO:0007601	0.00897704	4.16597	1.27112	5	145	visual perception	3.9063	0.0797283
GO:0030258	0.00914209	3.16657	2.34062	7	267	lipid modification	1.6129	0.0798409
GO:0016485	0.00935864	3.53173	1.7971	6	205	protein processing	2.34518	0.0798767
GO:0007219	0.00957202	3.51381	1.80587	6	206	Notch signaling pathway	2.32246	0.0798767
GO:1901565	0.00965643	1.87514	12.2378	21	1396	organonitrogen compound catabolic process	0.177003	0.0798767
GO:0050953	0.00975593	4.07769	1.29742	5	148	sensory perception of light stimulus	3.74954	0.0798767
GO:0016052	0.0100092	3.47852	1.8234	6	208	carbohydrate catabolic process	2.27801	0.0806894
GO:1901564	0.0102269	1.54467	54.6932	68	6239	organonitrogen compound metabolic process	0.0286953	0.0811956
GO:0001501	0.0123427	2.42744	4.37441	10	499	skeletal system development	0.659676	0.0965307
GO:1901135	0.0137849	1.92497	9.52025	17	1086	carbohydrate derivative metabolic process	0.236767	0.106225
GO:0050877	0.014309	2.11097	6.57476	13	750	nervous system process	0.379623	0.108666
GO:0016051	0.0161044	3.11774	2.02503	6	231	carbohydrate biosynthetic process	1.84697	0.119734
GO:0042063	0.0162235	2.81299	2.62114	7	299	gliogenesis	1.28614	0.119734
GO:0006090	0.0173183	3.50688	1.49905	5	171	pyruvate metabolic process	2.80873	0.126038
GO:0005975	0.018195	2.18125	5.34747	11	610	carbohydrate metabolic process	0.485585	0.130605
GO:0016125	0.0185272	3.44389	1.52534	5	174	sterol metabolic process	2.71271	0.131193
GO:0048839	0.0193634	3.40312	1.54288	5	176	inner ear development	2.65141	0.135286
GO:0072521	0.0206215	2.33869	4.05882	9	463	purine-containing compound metabolic process	0.689624	0.14218
GO:0050890	0.0239797	2.83552	2.21789	6	253	cognition	1.53972	0.163187
GO:0002244	0.0244069	3.19489	1.63931	5	187	hematopoietic progenitor cell differentiation	2.34865	0.163964
GO:0030324	0.0274841	3.09159	1.69191	5	193	lung development	2.20489	0.182299
GO:0030595	0.0280199	3.07501	1.70067	5	194	leukocyte chemotaxis	2.18222	0.18353
GO:0009150	0.0285498	2.32451	3.61174	8	412	purine ribonucleotide metabolic process	0.774154	0.183705
GO:0019318	0.0287477	2.71246	2.31432	6	264	hexose metabolic process	1.41408	0.183705
GO:0030323	0.029667	3.0263	1.72697	5	197	respiratory tube development	2.11626	0.187295
GO:0046942	0.0311081	2.65992	2.35815	6	269	carboxylic acid transport	1.362	0.193413
GO:0043583	0.0313743	2.9791	1.75327	5	200	ear development	2.05325	0.193413
GO:0015711	0.031784	2.42938	3.01562	7	344	organic anion transport	0.971657	0.193661
GO:0009887	0.0324721	1.78803	8.91538	15	1017	animal organ morphogenesis	0.238222	0.195579
GO:0050673	0.0334329	2.2499	3.7257	8	425	epithelial cell proliferation	0.727518	0.197234
GO:1901575	0.0334997	1.53971	19.8207	28	2261	organic substance catabolic process	0.0899681	0.197234
GO:0009259	0.0346361	2.23333	3.752	8	428	ribonucleotide metabolic process	0.717355	0.201659
GO:0060541	0.0388142	2.80396	1.85847	5	212	respiratory system development	1.82739	0.223502
GO:0019693	0.0392999	2.17457	3.84843	8	439	ribose phosphate metabolic process	0.681856	0.223744
GO:0005996	0.0400706	2.49534	2.50718	6	286	monosaccharide metabolic process	1.2049	0.223744
GO:0007600	0.0401372	2.30317	3.17342	7	362	sensory perception	0.87743	0.223744
GO:0006163	0.0410956	2.15394	3.88349	8	443	purine nucleotide metabolic process	0.669598	0.2266
GO:0007611	0.0415145	2.75001	1.89353	5	216	learning or memory	1.76033	0.2266
GO:0001944	0.0422309	1.83878	6.87282	12	784	vasculature development	0.320687	0.228134
GO:0008285	0.0426751	1.88937	6.11891	11	698	negative regulation of cell population proliferation	0.370863	0.228181
GO:0048705	0.0436129	2.71087	1.91983	5	219	skeletal system morphogenesis	1.71243	0.23084
GO:0006091	0.0451461	2.01183	4.68123	9	534	generation of precursor metabolites and energy	0.518432	0.236566
GO:0032496	0.0479314	2.38237	2.62114	6	299	response to lipopolysaccharide	1.1024	0.247622
GO:0033993	0.0484926	1.75316	7.81082	13	891	response to lipid	0.26898	0.247622
GO:0001666	0.0486738	2.20126	3.31368	7	378	response to hypoxia	0.804723	0.247622
GO:0006006	0.0502863	2.59977	1.99873	5	228	glucose metabolic process	1.57991	0.251993
GO:0055086	0.0504949	1.89282	5.53157	10	631	nucleobase-containing small molecule metabolic process	0.412547	0.251993
GO:0048731	0.0551762	1.37299	38.2388	47	4362	system development	0.040575	0.272758
GO:0002237	0.0588377	2.25638	2.7614	6	315	response to molecule of bacterial origin	0.993258	0.28814
GO:0036293	0.0602194	2.0911	3.48024	7	397	response to decreased oxygen levels	0.72954	0.292175
GO:0001568	0.0629192	1.75963	6.5397	11	746	blood vessel development	0.324674	0.298852
GO:0031667	0.0633065	1.95822	4.25168	8	485	response to nutrient levels	0.558648	0.298852
GO:0007423	0.0633065	1.95822	4.25168	8	485	sensory organ development	0.558648	0.298852
GO:0050896	0.0644874	1.34308	66.1246	75	7543	response to stimulus	0.0216523	0.301709
GO:0048514	0.0659794	1.79576	5.81209	10	663	blood vessel morphogenesis	0.373684	0.304297
GO:0009056	0.0666051	1.40603	23.8269	31	2718	catabolic process	0.0689278	0.304297
GO:0010033	0.0671193	1.38426	27.5	35	3137	response to organic substance	0.0584212	0.304297
GO:0051241	0.0673634	1.65813	8.22283	13	938	negative regulation of multicellular organismal process	0.2427	0.304297
GO:0009617	0.068887	1.92068	4.33058	8	494	response to bacterium	0.538478	0.305905
GO:0010876	0.068887	1.92068	4.33058	8	494	lipid localization	0.538478	0.305905
GO:0010038	0.0752422	2.10955	2.94549	6	336	response to metal ion	0.87298	0.331319
GO:0009743	0.0796284	2.25922	2.28802	5	261	response to carbohydrate	1.20565	0.343523
GO:0008283	0.0797947	1.44593	16.1476	22	1842	cell population proliferation	0.106506	0.343523
GO:0070482	0.0800859	1.94702	3.7257	7	425	response to oxygen levels	0.636579	0.343523
GO:0060326	0.080636	2.25027	2.29678	5	262	cell chemotaxis	1.19646	0.343523
GO:0006897	0.0829397	1.76904	5.28611	9	603	endocytosis	0.406574	0.350487
GO:0009991	0.0837751	1.83451	4.52344	8	516	response to extracellular stimulus	0.49354	0.351185
GO:0006869	0.0855866	1.91397	3.78706	7	432	lipid transport	0.616116	0.355932
GO:0045017	0.0878802	2.18949	2.35815	5	269	glycerolipid biosynthetic process	1.135	0.360881
GO:0044248	0.0882833	1.38381	20.8201	27	2375	cellular catabolic process	0.0786264	0.360881
GO:0035295	0.0888429	1.55146	9.44136	14	1077	tube development	0.198257	0.360881
GO:0030855	0.0910323	1.73246	5.3913	9	615	epithelial cell differentiation	0.390863	0.36693
GO:0048878	0.0935213	1.53736	9.52025	14	1086	chemical homeostasis	0.194985	0.374085
GO:0050678	0.0997997	1.94616	3.18218	6	363	regulation of epithelial cell proliferation	0.747945	0.396175
GO:0045765	0.102205	2.08476	2.47211	5	282	regulation of angiogenesis	1.03277	0.399668
GO:0015980	0.102205	2.08476	2.47211	5	282	energy derivation by oxidation of organic compounds	1.03277	0.399668
GO:0070848	0.105366	1.62764	6.37314	10	727	response to growth factor	0.310787	0.408974
GO:1901342	0.106835	2.05449	2.50718	5	286	regulation of vasculature development	1.00408	0.411631
GO:0048646	0.107899	1.49795	9.74818	14	1112	anatomical structure formation involved in morphogenesis	0.185973	0.412694
GO:0034612	0.110375	2.03234	2.53347	5	289	response to tumor necrosis factor	0.983346	0.417063
GO:0009117	0.111948	1.70854	4.83902	8	552	nucleotide metabolic process	0.431264	0.417063
GO:0051674	0.112225	1.40773	14.1664	19	1616	localization of cell	0.11951	0.417063
GO:0048870	0.112225	1.40773	14.1664	19	1616	cell motility	0.11951	0.417063
GO:0001822	0.115184	2.00353	2.56854	5	293	kidney development	0.95668	0.422071
GO:0008544	0.115184	2.00353	2.56854	5	293	epidermis development	0.95668	0.422071
GO:0006753	0.11623	1.69236	4.88286	8	557	nucleoside phosphate metabolic process	0.423557	0.422948
GO:0001525	0.119719	1.67962	4.91792	8	561	angiogenesis	0.417538	0.430078
GO:0034097	0.119831	1.46887	9.92351	14	1132	response to cytokine	0.17946	0.430078
GO:0009888	0.123486	1.36594	16.1476	21	1842	tissue development	0.101665	0.433133
GO:0072001	0.123836	1.95499	2.6299	5	300	renal system development	0.912556	0.433133
GO:0009628	0.124319	1.44006	10.8527	15	1238	response to abiotic stimulus	0.160761	0.433133
GO:0070887	0.124799	1.2941	27.1932	33	3102	cellular response to chemical stimulus	0.0563329	0.433133
GO:0072359	0.124815	1.45753	9.99364	14	1140	circulatory system development	0.17695	0.433133
GO:0008015	0.135025	1.69145	4.26045	7	486	blood circulation	0.486808	0.46548
GO:0044262	0.136707	1.88952	2.71757	5	310	cellular carbohydrate metabolic process	0.854631	0.468198
GO:0042127	0.140522	1.36726	13.7369	18	1567	regulation of cell population proliferation	0.120411	0.478141
GO:0015849	0.143358	1.85836	2.7614	5	315	organic acid transport	0.827715	0.484643
GO:0014070	0.146002	1.45445	8.53842	12	974	response to organic cyclic compound	0.207776	0.490417
GO:0010256	0.14977	1.64172	4.38317	7	500	endomembrane system organization	0.459928	0.498012
GO:0007275	0.150164	1.23271	42.0609	48	4798	multicellular organism development	0.0342494	0.498012
GO:0007155	0.152484	1.37137	12.1239	16	1383	cell adhesion	0.137407	0.502525
GO:0046034	0.154289	1.81055	2.83153	5	323	ATP metabolic process	0.787221	0.505295
GO:0022610	0.157109	1.36363	12.1852	16	1390	biological adhesion	0.136026	0.510958
GO:0001654	0.158476	1.79324	2.85783	5	326	eye development	0.772799	0.510958
GO:0048468	0.158943	1.30398	17.6379	22	2012	cell development	0.0892686	0.510958
GO:0003013	0.160753	1.60789	4.47084	7	510	circulatory system process	0.442068	0.513626
GO:0009653	0.163547	1.26563	23.2659	28	2654	anatomical structure morphogenesis	0.0652962	0.519384
GO:0035239	0.168161	1.43279	7.91601	11	903	tube morphogenesis	0.221589	0.526081
GO:0016477	0.168316	1.33417	13.2284	17	1509	cell migration	0.122632	0.526081
GO:0050900	0.168667	1.65473	3.71693	6	424	leukocyte migration	0.548216	0.526081
GO:0150063	0.171313	1.74319	2.93673	5	335	visual system development	0.731833	0.531173
GO:0000902	0.17267	1.38252	9.71311	13	1108	cell morphogenesis	0.173938	0.532229
GO:0048880	0.177147	1.72181	2.97179	5	339	sensory system development	0.714665	0.540467
GO:0000904	0.178602	1.43823	7.15334	10	816	cell morphogenesis involved in differentiation	0.24669	0.540467
GO:0046486	0.178927	1.6227	3.78706	6	432	glycerolipid metabolic process	0.528099	0.540467
GO:0048856	0.179468	1.20304	45.6025	51	5202	anatomical structure development	0.0309572	0.540467
GO:0034330	0.182627	1.46072	6.3293	9	722	cell junction organization	0.283596	0.546653
GO:0006928	0.184356	1.27184	18.0148	22	2055	movement of cell or subcellular component	0.0855718	0.546653
GO:0022603	0.184652	1.38023	8.95921	12	1022	regulation of anatomical structure morphogenesis	0.188717	0.546653
GO:0001655	0.187536	1.6856	3.03316	5	346	urogenital system development	0.68604	0.552073
GO:1901137	0.190462	1.48066	5.54033	8	632	carbohydrate derivative biosynthetic process	0.328994	0.556008
GO:0090132	0.192056	1.67053	3.05946	5	349	epithelium migration	0.674297	0.556008
GO:0010631	0.192056	1.67053	3.05946	5	349	epithelial cell migration	0.674297	0.556008
GO:0044057	0.195792	1.51402	4.73383	7	540	regulation of system process	0.394314	0.563709
GO:0042327	0.200403	1.37343	8.2316	11	939	positive regulation of phosphorylation	0.204924	0.573017
GO:0090130	0.201212	1.64118	3.11205	5	355	tissue migration	0.651696	0.573017
GO:0040011	0.217391	1.25327	15.6742	19	1788	locomotion	0.0976226	0.615745
GO:0001667	0.220922	1.50918	4.05882	6	463	ameboidal-type cell migration	0.459749	0.622383
GO:1902533	0.225293	1.33334	8.45953	11	965	positive regulation of intracellular signal transduction	0.19403	0.631303
GO:0010243	0.22677	1.3141	9.37123	12	1069	response to organonitrogen compound	0.172488	0.632062
GO:0016310	0.230723	1.22164	18.6373	22	2126	phosphorylation	0.0799518	0.639675
GO:0030334	0.233199	1.32144	8.52966	11	973	regulation of cell migration	0.190853	0.643139
GO:1901652	0.241453	1.41445	5.04942	7	576	response to peptide	0.346565	0.662416
GO:0007169	0.245037	1.34495	6.83775	9	780	transmembrane receptor protein tyrosine kinase signaling pathway	0.242988	0.668747
GO:0022008	0.24927	1.23252	14.184	17	1618	neurogenesis	0.106665	0.676416
GO:0051239	0.250429	1.19087	21.723	25	2478	regulation of multicellular organismal process	0.0668758	0.676416
GO:0048869	0.254284	1.16018	33.2946	37	3798	cellular developmental process	0.0421331	0.678119
GO:0030335	0.254725	1.38898	5.13708	7	586	positive regulation of cell migration	0.334838	0.678119
GO:0040007	0.256522	1.28832	8.73128	11	996	growth	0.18214	0.678119
GO:0006793	0.256606	1.17145	26.5796	30	3032	phosphorus metabolic process	0.0536037	0.678119
GO:0009611	0.258768	1.34887	6.04878	8	690	response to wounding	0.276009	0.678119
GO:0098609	0.258824	1.32314	6.94295	9	792	cell-cell adhesion	0.235681	0.678119
GO:0045937	0.264827	1.27715	8.80141	11	1004	positive regulation of phosphate metabolic process	0.179249	0.684042
GO:0010562	0.264827	1.27715	8.80141	11	1004	positive regulation of phosphorus metabolic process	0.179249	0.684042
GO:0071363	0.265001	1.33855	6.09261	8	695	cellular response to growth factor stimulus	0.272052	0.684042
GO:0032502	0.270571	1.13596	49.2055	53	5613	developmental process	0.0276323	0.694996
GO:0009896	0.274855	1.39234	4.38317	6	500	positive regulation of catabolic process	0.394224	0.696221
GO:0007610	0.274855	1.39234	4.38317	6	500	behavior	0.394224	0.696221
GO:2000147	0.275034	1.3524	5.26858	7	601	positive regulation of cell motility	0.318332	0.696221
GO:0050808	0.280734	1.43447	3.5416	5	404	synapse organization	0.503198	0.703995
GO:0052547	0.285816	1.42345	3.5679	5	407	regulation of peptidase activity	0.495807	0.703995
GO:0009605	0.285943	1.16444	21.2146	24	2420	response to external stimulus	0.0673151	0.703995
GO:0048589	0.286523	1.30457	6.24164	8	712	developmental growth	0.259216	0.703995
GO:2000145	0.288124	1.24736	8.99427	11	1026	regulation of cell motility	0.171644	0.703995
GO:1901698	0.288726	1.23415	9.92351	12	1132	response to nitrogen compound	0.153823	0.703995
GO:0048513	0.290165	1.14427	27.9997	31	3194	animal organ development	0.0499142	0.703995
GO:0040017	0.290196	1.32672	5.36501	7	612	positive regulation of locomotion	0.306992	0.703995
GO:0051272	0.290196	1.32672	5.36501	7	612	positive regulation of cellular component movement	0.306992	0.703995
GO:0043603	0.292835	1.22938	9.95857	12	1136	cellular amide metabolic process	0.152741	0.704896
GO:0055085	0.293258	1.20942	11.8258	14	1349	transmembrane transport	0.126368	0.704896
GO:0051093	0.296754	1.26811	7.22347	9	824	negative regulation of developmental process	0.217731	0.710041
GO:0009967	0.300338	1.18766	13.7719	16	1571	positive regulation of signal transduction	0.106488	0.713243
GO:0042692	0.301167	1.39136	3.6468	5	416	muscle cell differentiation	0.474586	0.713243
GO:0019637	0.302176	1.23036	9.10824	11	1039	organophosphate metabolic process	0.167376	0.713243
GO:0090407	0.304152	1.30418	5.45267	7	622	organophosphate biosynthetic process	0.2972	0.714689
GO:0006796	0.308766	1.13488	26.3078	29	3001	phosphate-containing compound metabolic process	0.052893	0.722292
GO:0071345	0.315312	1.21504	9.21343	11	1051	cellular response to cytokine stimulus	0.163576	0.734327
GO:0001503	0.318378	1.35731	3.73446	5	426	ossification	0.452567	0.738186
GO:0008284	0.326107	1.2296	7.43386	9	848	positive regulation of cell population proliferation	0.205581	0.752776
GO:0040012	0.33193	1.19638	9.34493	11	1066	regulation of locomotion	0.159005	0.762325
GO:0010035	0.333153	1.28925	4.7163	6	538	response to inorganic substance	0.340501	0.762325
GO:0051179	0.337578	1.0961	54.2111	57	6184	localization	0.0244832	0.768497
GO:0010647	0.339532	1.14689	15.1044	17	1723	positive regulation of cell communication	0.0940611	0.768497
GO:0007399	0.340251	1.12837	19.9171	22	2272	nervous system development	0.0700064	0.768497
GO:0030154	0.345779	1.10223	32.6283	35	3722	cell differentiation	0.0414999	0.771861
GO:0023056	0.345852	1.14155	15.1658	17	1730	positive regulation of signaling	0.0933015	0.771861
GO:0062012	0.346159	1.30608	3.87473	5	442	regulation of small molecule metabolic process	0.420395	0.771861
GO:0007167	0.352116	1.17467	9.50272	11	1084	enzyme linked receptor protein signaling pathway	0.153768	0.781817
GO:0042325	0.36184	1.14283	12.4394	14	1419	regulation of phosphorylation	0.114208	0.798177
GO:0042060	0.362929	1.24304	4.88286	6	557	wound healing	0.317667	0.798177
GO:0061061	0.364054	1.21698	5.82086	7	664	muscle structure development	0.260792	0.798177
GO:0051270	0.370238	1.15598	9.64298	11	1100	regulation of cellular component movement	0.149327	0.808354
GO:0048584	0.372203	1.11027	18.3217	20	2090	positive regulation of response to stimulus	0.0752089	0.809271
GO:0051704	0.374924	1.17151	7.77575	9	887	multi-organism process	0.1879	0.811819
GO:0065008	0.376893	1.0838	33.0316	35	3768	regulation of biological quality	0.0404928	0.812723
GO:0002694	0.382849	1.24427	4.05882	5	463	regulation of leukocyte activation	0.383124	0.816866
GO:0048598	0.383409	1.21322	4.99682	6	570	embryonic morphogenesis	0.303343	0.816866
GO:0022414	0.383491	1.13541	10.7037	12	1221	reproductive process	0.132215	0.816866
GO:0000003	0.386772	1.13234	10.73	12	1224	reproduction	0.131568	0.82052
GO:0043009	0.388649	1.18478	5.96988	7	681	chordate embryonic development	0.247934	0.821177
GO:0043408	0.394447	1.17743	6.00495	7	685	regulation of MAPK cascade	0.245047	0.82676
GO:0050801	0.394447	1.17743	6.00495	7	685	ion homeostasis	0.245047	0.82676
GO:0048732	0.398579	1.21948	4.13772	5	472	gland development	0.368653	0.832093
GO:0044703	0.400519	1.15504	6.99555	8	798	multi-organism reproductive process	0.206355	0.832747
GO:0098656	0.402071	1.2141	4.15525	5	474	anion transmembrane transport	0.365549	0.832747
GO:0009792	0.408946	1.15945	6.09261	7	695	embryo development ending in birth or egg hatching	0.238046	0.843652
GO:0030182	0.418724	1.09835	11.9573	13	1364	neuron differentiation	0.114775	0.860438
GO:0048666	0.430944	1.09782	10.1076	11	1153	neuron development	0.135915	0.882088
GO:0007507	0.433802	1.14535	5.27734	6	602	heart development	0.271951	0.884483
GO:0006935	0.438504	1.13936	5.30364	6	605	chemotaxis	0.26926	0.890605
GO:0042330	0.441635	1.1354	5.32117	6	607	taxis	0.267489	0.893502
GO:1901566	0.447983	1.06516	15.1483	16	1728	organonitrogen compound biosynthetic process	0.0880165	0.899404
GO:0032879	0.447985	1.05226	23.038	24	2628	regulation of localization	0.0570811	0.899404
GO:0048699	0.450384	1.06877	13.2021	14	1506	generation of neurons	0.101393	0.900767
GO:0043410	0.454084	1.13858	4.41824	5	504	positive regulation of MAPK cascade	0.323326	0.904715
GO:0001934	0.465186	1.08493	7.41633	8	846	positive regulation of protein phosphorylation	0.183604	0.923323
GO:0050865	0.469484	1.11766	4.49714	5	513	regulation of cell activation	0.312081	0.928339
GO:0044238	0.475404	1.03258	82.1232	83	9368	primary metabolic process	0.0155352	0.933363
GO:0060627	0.476288	1.1086	4.5322	5	517	regulation of vesicle-mediated transport	0.30727	0.933363
GO:0009719	0.477885	1.0454	14.4294	15	1646	response to endogenous stimulus	0.0909418	0.933363
GO:0071704	0.480852	1.03175	86.1907	87	9832	organic substance metabolic process	0.0147832	0.933363
GO:0030155	0.480931	1.07684	6.53093	7	745	regulation of cell adhesion	0.207165	0.933363
GO:0018193	0.484549	1.04755	11.5102	12	1313	peptidyl-amino acid modification	0.114336	0.934515
GO:0007417	0.485092	1.05883	8.53842	9	974	central nervous system development	0.155832	0.934515
GO:0032989	0.487837	1.06199	7.56536	8	863	cellular component morphogenesis	0.176441	0.936361
GO:0031401	0.489704	1.05003	9.56409	10	1091	positive regulation of protein modification process	0.138001	0.936514
GO:0032990	0.492278	1.06465	6.60106	7	753	cell part morphogenesis	0.202787	0.938013
GO:0051247	0.49625	1.03375	13.5966	14	1551	positive regulation of protein metabolic process	0.0955952	0.942157
GO:0000165	0.498417	1.0515	7.63549	8	871	MAPK cascade	0.173215	0.942854
GO:1901361	0.503404	1.06137	5.67183	6	647	organic cyclic compound catabolic process	0.235437	0.945366
GO:0098771	0.504921	1.05964	5.68059	6	648	inorganic ion homeostasis	0.234711	0.945366
GO:0001932	0.505157	1.03346	10.6774	11	1218	regulation of protein phosphorylation	0.121795	0.945366
GO:0002376	0.519802	1.00955	23.8182	24	2717	immune system process	0.0534028	0.96931
GO:0008152	0.524571	1.01098	89.7323	90	10236	metabolic process	0.0141096	0.974735
GO:0030030	0.531451	1.0079	13.9034	14	1586	cell projection organization	0.0914226	0.983956
GO:0032270	0.533289	1.00761	12.9128	13	1473	positive regulation of cellular protein metabolic process	0.0984169	0.983956
GO:0001817	0.540972	1.02716	4.87409	5	556	regulation of cytokine production	0.265676	0.994629
GO:0009058	0.547341	0.993984	50.1786	50	5724	biosynthetic process	0.025067	1
GO:0042592	0.547909	0.995047	16.0687	16	1833	homeostatic process	0.0782216	1
GO:0060322	0.550526	1.00472	6.96925	7	795	head development	0.181926	1
GO:0044093	0.559971	0.986926	16.1827	16	1846	positive regulation of molecular function	0.0771238	1
GO:0019220	0.56206	0.985947	14.1752	14	1617	regulation of phosphate metabolic process	0.0879508	1
GO:0007346	0.564155	0.994508	6.03125	6	688	regulation of mitotic cell cycle	0.208212	1
GO:0043207	0.564173	0.98644	10.1251	10	1155	response to external biotic stimulus	0.123131	1
GO:0051707	0.564173	0.98644	10.1251	10	1155	response to other organism	0.123131	1
GO:0051345	0.569336	0.986135	7.09198	7	809	positive regulation of hydrolase activity	0.175684	1
GO:0009790	0.569413	0.982953	9.1433	9	1043	embryo development	0.135896	1
GO:0051174	0.569851	0.980419	14.2453	14	1625	regulation of phosphorus metabolic process	0.087087	1
GO:0044237	0.5783	0.982946	85.4544	85	9748	cellular metabolic process	0.0146933	1
GO:0043085	0.579871	0.973254	13.3161	13	1519	positive regulation of catalytic activity	0.0925464	1
GO:0031175	0.58235	0.971783	9.23973	9	1054	neuron projection development	0.133074	1
GO:0048534	0.582879	0.971902	8.21407	8	937	hematopoietic or lymphoid organ development	0.149673	1
GO:0006508	0.590063	0.966165	14.4294	14	1646	proteolysis	0.084879	1
GO:0009607	0.610684	0.948433	10.4933	10	1197	response to biotic stimulus	0.114642	1
GO:0043549	0.611979	0.945689	8.42446	8	961	regulation of kinase activity	0.14229	1
GO:0009966	0.617858	0.954242	25.9396	25	2959	regulation of signal transduction	0.046901	1
GO:0048858	0.619924	0.936593	6.3819	6	728	cell projection morphogenesis	0.18596	1
GO:0051130	0.622476	0.938919	10.5897	10	1208	positive regulation of cellular component organization	0.112564	1
GO:0002682	0.622943	0.939795	11.6329	11	1327	regulation of immune system process	0.102608	1
GO:0001816	0.624005	0.931731	5.34747	5	610	cytokine production	0.22072	1
GO:0010646	0.626593	0.950952	29.0955	28	3319	regulation of cell communication	0.0417518	1
GO:0048583	0.630037	0.950941	33.1982	32	3787	regulation of response to stimulus	0.0366515	1
GO:0009894	0.630098	0.931211	9.60792	9	1096	regulation of catabolic process	0.12307	1
GO:0055082	0.631918	0.924436	6.4608	6	737	cellular chemical homeostasis	0.181446	1
GO:0002520	0.643462	0.917734	8.66115	8	988	immune system development	0.134619	1
GO:0019439	0.644047	0.909708	5.4702	5	624	aromatic compound catabolic process	0.210927	1
GO:0060429	0.644297	0.919281	9.72188	9	1109	epithelium development	0.120202	1
GO:1901576	0.646699	0.947763	49.5737	48	5655	organic substance biosynthetic process	0.0246552	1
GO:0034220	0.647532	0.916567	9.74818	9	1112	ion transmembrane transport	0.119554	1
GO:0019538	0.649189	0.945872	46.5931	45	5315	protein metabolic process	0.026166	1
GO:0023051	0.654991	0.935662	29.4549	28	3360	regulation of signaling	0.0407391	1
GO:0051234	0.655864	0.941472	42.6571	41	4866	establishment of localization	0.0284427	1
GO:0006810	0.658452	0.939858	41.684	40	4755	transport	0.0290597	1
GO:0051716	0.659947	0.942708	55.789	54	6364	cellular response to stimulus	0.0219011	1
GO:0055080	0.662062	0.890131	5.58416	5	637	cation homeostasis	0.202406	1
GO:0051049	0.665151	0.911767	14.1051	13	1609	regulation of transport	0.0824827	1
GO:0010629	0.667646	0.899721	9.91474	9	1131	negative regulation of gene expression	0.115571	1
GO:0048667	0.668835	0.882815	5.628	5	642	cell morphogenesis involved in neuron differentiation	0.199265	1
GO:0051094	0.671779	0.899369	11.0105	10	1256	positive regulation of developmental process	0.104124	1
GO:0071417	0.674191	0.877043	5.66306	5	646	cellular response to organonitrogen compound	0.196805	1
GO:0071702	0.677922	0.917374	23.5902	22	2691	organic substance transport	0.0499031	1
GO:0071310	0.682102	0.91365	22.6084	21	2579	cellular response to organic substance	0.0518619	1
GO:0048609	0.682119	0.868521	5.71566	5	652	multicellular organismal reproductive process	0.1932	1
GO:0061024	0.685208	0.876402	7.91601	7	903	membrane organization	0.141011	1
GO:0030097	0.685208	0.876402	7.91601	7	903	hemopoiesis	0.141011	1
GO:0051336	0.687379	0.886855	11.1508	10	1272	regulation of hydrolase activity	0.101521	1
GO:0032504	0.691206	0.858775	5.77702	5	659	multicellular organism reproduction	0.189117	1
GO:0006468	0.69144	0.892784	14.368	13	1639	protein phosphorylation	0.0794909	1
GO:0040008	0.702634	0.846547	5.85592	5	668	regulation of growth	0.184056	1
GO:0048729	0.703885	0.845209	5.86469	5	669	tissue morphogenesis	0.183506	1
GO:0033674	0.705133	0.843874	5.87345	5	670	positive regulation of kinase activity	0.182958	1
GO:0032101	0.707184	0.855961	8.09134	7	923	regulation of response to external stimulus	0.134967	1
GO:0035556	0.708637	0.898998	23.976	22	2735	intracellular signal transduction	0.0483103	1
GO:0031329	0.71569	0.848032	8.16147	7	931	regulation of cellular catabolic process	0.132657	1
GO:0050793	0.717946	0.888215	20.9691	19	2392	regulation of developmental process	0.054546	1
GO:1902531	0.718089	0.876378	15.7093	14	1792	regulation of intracellular signal transduction	0.0716117	1
GO:0051240	0.718147	0.86202	11.4401	10	1305	positive regulation of multicellular organismal process	0.0964519	1
GO:0002274	0.718626	0.829459	5.96988	5	681	myeloid leukocyte activation	0.177096	1
GO:0044249	0.71888	0.912308	48.662	46	5551	cellular biosynthetic process	0.0245215	1
GO:0120036	0.721079	0.867711	13.6141	12	1553	plasma membrane bounded cell projection organization	0.0817279	1
GO:0031399	0.722999	0.869721	14.7012	13	1677	regulation of protein modification process	0.0759292	1
GO:0072657	0.725802	0.821792	6.02248	5	687	protein localization to membrane	0.174016	1
GO:0003006	0.730673	0.826068	7.17964	6	819	developmental process involved in reproduction	0.146932	1
GO:0051338	0.733674	0.838132	9.41506	8	1074	regulation of transferase activity	0.113923	1
GO:1901699	0.735168	0.811777	6.09261	5	695	cellular response to nitrogen compound	0.170033	1
GO:0019221	0.735168	0.811777	6.09261	5	695	cytokine-mediated signaling pathway	0.170033	1
GO:2000026	0.735844	0.847575	11.6154	10	1325	regulation of multicellular organismal development	0.0935621	1
GO:0065009	0.73834	0.882465	25.4136	23	2899	regulation of molecular function	0.0449535	1
GO:0006820	0.742774	0.878034	24.4318	22	2787	anion transport	0.0465244	1
GO:0006812	0.744171	0.82133	8.40693	7	959	cation transport	0.125024	1
GO:0045944	0.744961	0.828034	9.52025	8	1086	positive regulation of transcription by RNA polymerase II	0.11142	1
GO:0120035	0.745429	0.800784	6.17151	5	704	regulation of plasma membrane bounded cell projection organization	0.165713	1
GO:0045597	0.745549	0.811223	7.30237	6	833	positive regulation of cell differentiation	0.142034	1
GO:0009725	0.746127	0.819483	8.42446	7	961	response to hormone	0.124504	1
GO:0045321	0.747403	0.832358	10.6423	9	1214	leukocyte activation	0.100308	1
GO:0050790	0.749442	0.865373	20.3204	18	2318	regulation of catalytic activity	0.0550272	1
GO:0030162	0.751004	0.794798	6.21534	5	709	regulation of proteolysis	0.163384	1
GO:0007165	0.751894	0.892896	44.1386	41	5035	signal transduction	0.0265654	1
GO:0046903	0.752749	0.838784	12.8778	11	1469	secretion	0.08373	1
GO:0010628	0.754805	0.811265	8.50336	7	970	positive regulation of gene expression	0.122204	1
GO:0002684	0.756824	0.799907	7.3988	6	844	positive regulation of immune system process	0.138356	1
GO:0051246	0.757491	0.864668	22.5383	20	2571	regulation of protein metabolic process	0.0497001	1
GO:0045859	0.76183	0.794861	7.44263	6	849	regulation of protein kinase activity	0.136731	1
GO:0031344	0.761885	0.783078	6.303	5	719	regulation of cell projection organization	0.158871	1
GO:0006807	0.764574	0.891317	78.3361	75	8936	nitrogen compound metabolic process	0.0154279	1
GO:0007267	0.766858	0.827368	13.0356	11	1487	cell-cell signaling	0.0817151	1
GO:0009057	0.778935	0.817451	13.1758	11	1503	macromolecule catabolic process	0.0799846	1
GO:0051050	0.782039	0.774306	7.62672	6	870	positive regulation of transport	0.13021	1
GO:0023052	0.784715	0.876744	47.7678	44	5449	signaling	0.0243417	1
GO:0007420	0.786556	0.756246	6.5134	5	743	brain development	0.148773	1
GO:0007166	0.787878	0.846705	24.0373	21	2742	cell surface receptor signaling pathway	0.0458792	1
GO:0007154	0.797263	0.869652	48.0045	44	5476	cell communication	0.0241023	1
GO:0051347	0.80002	0.741384	6.63613	5	757	positive regulation of transferase activity	0.143321	1
GO:1901701	0.808841	0.76896	10.1865	8	1162	cellular response to oxygen-containing compound	0.0973217	1
GO:0019725	0.816145	0.738668	7.96861	6	909	cellular homeostasis	0.119277	1
GO:0044087	0.817521	0.749884	9.1433	7	1043	regulation of cellular component biogenesis	0.105697	1
GO:0032268	0.819477	0.815671	21.3373	18	2434	regulation of cellular protein metabolic process	0.0499072	1
GO:0044092	0.82208	0.745222	9.1959	7	1049	negative regulation of molecular function	0.104491	1
GO:0051128	0.823219	0.812824	21.3987	18	2441	regulation of cellular component organization	0.0496214	1
GO:0030036	0.825806	0.712295	6.89035	5	786	actin cytoskeleton organization	0.13294	1
GO:0006887	0.839457	0.713281	8.2316	6	939	exocytosis	0.111777	1
GO:0016192	0.848277	0.780318	18.5584	15	2117	vesicle-mediated transport	0.054977	1
GO:0045055	0.854051	0.679057	7.20594	5	822	regulated exocytosis	0.121551	1
GO:0006955	0.858137	0.754239	15.3937	12	1756	immune response	0.063924	1
GO:0006811	0.859534	0.804703	29.5777	25	3374	ion transport	0.036073	1
GO:0060548	0.859702	0.690246	8.48583	6	968	negative regulation of cell death	0.10518	1
GO:0001775	0.865489	0.722101	12.0976	9	1380	cell activation	0.0776276	1
GO:0098542	0.870711	0.65848	7.41633	5	846	defense response to other organism	0.114752	1
GO:0071495	0.875658	0.71116	12.2641	9	1399	cellular response to endogenous stimulus	0.0755334	1
GO:0043066	0.876537	0.651063	7.49523	5	855	negative regulation of apoptotic process	0.112349	1
GO:0044419	0.881392	0.738143	16.9454	13	1933	biological process involved in interspecies interaction between organisms	0.0571494	1
GO:0000278	0.88366	0.677309	10.0375	7	1145	mitotic cell cycle	0.0877039	1
GO:0030029	0.886942	0.637473	7.64426	5	872	actin filament-based process	0.108011	1
GO:0043069	0.88753	0.63669	7.65302	5	873	negative regulation of programmed cell death	0.107764	1
GO:0006952	0.8883	0.685298	11.3086	8	1290	defense response	0.0789664	1
GO:0045893	0.894151	0.690153	12.5972	9	1437	positive regulation of transcription, DNA-templated	0.0715914	1
GO:0044267	0.894737	0.797381	43.0778	37	4914	cellular protein metabolic process	0.0251688	1
GO:0033365	0.895018	0.646738	9.01181	6	1028	protein localization to organelle	0.0932603	1
GO:0042981	0.896408	0.687472	12.6411	9	1442	regulation of apoptotic process	0.0710958	1
GO:0016043	0.896633	0.804422	52.3965	46	5977	cellular component organization	0.0211506	1
GO:0031325	0.896747	0.764585	27.237	22	3107	positive regulation of cellular metabolic process	0.0374345	1
GO:0043067	0.909138	0.67177	12.9041	9	1472	regulation of programmed cell death	0.0682274	1
GO:0032940	0.914159	0.652651	11.817	8	1348	secretion by cell	0.0723173	1
GO:0051173	0.915688	0.738109	25.5802	20	2918	positive regulation of nitrogen compound metabolic process	0.0385826	1
GO:1901360	0.917452	0.7827	48.9864	42	5588	organic cyclic compound metabolic process	0.0220937	1
GO:0045935	0.920217	0.678153	15.5252	11	1771	positive regulation of nucleobase-containing compound metabolic process	0.0576086	1
GO:1903508	0.925439	0.649872	13.2898	9	1516	positive regulation of nucleic acid-templated transcription	0.0643244	1
GO:1902680	0.925779	0.649389	13.2986	9	1517	positive regulation of RNA biosynthetic process	0.0642396	1
GO:0006357	0.925974	0.679375	16.8489	12	1922	regulation of transcription by RNA polymerase II	0.0533588	1
GO:0140352	0.928898	0.631734	12.1677	8	1388	export from cell	0.0682092	1
GO:0033036	0.929728	0.729652	28.2364	22	3221	macromolecule localization	0.0348316	1
GO:0010648	0.930579	0.629205	12.2115	8	1393	negative regulation of cell communication	0.0677204	1
GO:0034613	0.930877	0.680793	18.1551	13	2071	cellular protein localization	0.0497869	1
GO:0009893	0.931074	0.734809	30.4718	24	3476	positive regulation of metabolic process	0.0326275	1
GO:0023057	0.931242	0.628198	12.2291	8	1395	negative regulation of signaling	0.0675264	1
GO:0045595	0.934164	0.637056	13.5265	9	1543	regulation of cell differentiation	0.062093	1
GO:0070727	0.934218	0.676167	18.2603	13	2083	cellular macromolecule localization	0.0492149	1
GO:0006950	0.938052	0.729354	31.8306	25	3631	response to stress	0.0311472	1
GO:0071840	0.940023	0.762471	54.0095	46	6161	cellular component organization or biogenesis	0.0199061	1
GO:0048518	0.941677	0.756843	49.977	42	5701	positive regulation of biological process	0.0212265	1
GO:0007010	0.94256	0.610083	12.5534	8	1432	cytoskeleton organization	0.064082	1
GO:0051726	0.94411	0.591462	11.3524	7	1295	regulation of cell cycle	0.0685631	1
GO:0032269	0.944497	0.548874	8.78388	5	1002	negative regulation of cellular protein metabolic process	0.0818025	1
GO:0009968	0.944683	0.590453	11.37	7	1297	negative regulation of signal transduction	0.0683518	1
GO:0030163	0.946372	0.545339	8.83648	5	1008	protein catabolic process	0.0808315	1
GO:0051641	0.948238	0.71246	31.1819	24	3557	cellular localization	0.0311584	1
GO:0010941	0.949513	0.611862	14.0174	9	1599	regulation of cell death	0.0578199	1
GO:0048522	0.950458	0.740679	46.26	38	5277	positive regulation of cellular process	0.0224151	1
GO:0051254	0.951665	0.607978	14.0963	9	1608	positive regulation of RNA metabolic process	0.0571745	1
GO:0048585	0.953511	0.604562	14.1664	9	1616	negative regulation of response to stimulus	0.0566098	1
GO:1901362	0.955624	0.71069	34.8287	27	3973	organic cyclic compound biosynthetic process	0.0280969	1
GO:0051248	0.957737	0.522272	9.1959	5	1049	negative regulation of protein metabolic process	0.0746364	1
GO:0080134	0.958101	0.56479	11.8346	7	1350	regulation of response to stress	0.0630903	1
GO:0043269	0.95945	0.542274	10.5897	6	1208	regulation of ion transport	0.0675382	1
GO:0006366	0.962509	0.620339	18.2077	12	2077	transcription by RNA polymerase II	0.045692	1
GO:0022607	0.963738	0.660937	25.2821	18	2884	cellular component assembly	0.0355479	1
GO:0010605	0.964898	0.652942	24.2039	17	2761	negative regulation of macromolecule metabolic process	0.0366309	1
GO:0044403	0.965667	0.503968	9.50272	5	1084	biological process involved in symbiotic interaction	0.0698945	1
GO:0031328	0.96756	0.588057	16.0424	10	1830	positive regulation of cellular biosynthetic process	0.0490489	1
GO:0009891	0.971354	0.5789	16.2616	10	1855	positive regulation of biosynthetic process	0.0477358	1
GO:0048519	0.973367	0.697087	44.6382	35	5092	negative regulation of biological process	0.0221729	1
GO:0002252	0.974028	0.481643	9.90597	5	1130	immune effector process	0.0643198	1
GO:0010557	0.975051	0.556014	15.2447	9	1739	positive regulation of macromolecule biosynthetic process	0.0488849	1
GO:0009987	0.976707	0.497381	119.854	116	13672	cellular process	0.0101936	1
GO:0009892	0.977903	0.628621	26.299	18	3000	negative regulation of metabolic process	0.032852	1
GO:0071705	0.979271	0.588555	20.5133	13	2340	nitrogen compound transport	0.0389981	1
GO:0045892	0.979605	0.464098	10.2479	5	1169	negative regulation of transcription, DNA-templated	0.0600998	1
GO:0065007	0.983005	0.678902	90.197	80	10289	biological regulation	0.012413	1
GO:0010604	0.983389	0.617642	28.0172	19	3196	positive regulation of macromolecule metabolic process	0.0305543	1
GO:1903507	0.984258	0.446878	10.6073	5	1210	negative regulation of nucleic acid-templated transcription	0.0560959	1
GO:1902679	0.984358	0.446472	10.616	5	1211	negative regulation of RNA biosynthetic process	0.0560033	1
GO:0006464	0.98646	0.629969	34.1186	24	3892	cellular protein modification process	0.0260254	1
GO:0036211	0.98646	0.629969	34.1186	24	3892	protein modification process	0.0260254	1
GO:0006915	0.986878	0.515193	16.2879	9	1858	apoptotic process	0.0428236	1
GO:0048523	0.987004	0.647537	40.8424	30	4659	negative regulation of cellular process	0.0227022	1
GO:0044085	0.987316	0.597239	27.3685	18	3122	cellular component biogenesis	0.0303346	1
GO:0033043	0.989726	0.42149	11.1859	5	1276	regulation of organelle organization	0.050443	1
GO:0012501	0.991264	0.49295	16.9191	9	1930	programmed cell death	0.039688	1
GO:0007049	0.991512	0.491467	16.9629	9	1935	cell cycle	0.0394832	1
GO:0051253	0.9919	0.408724	11.5014	5	1312	negative regulation of RNA metabolic process	0.0477127	1
GO:0043412	0.994191	0.590259	35.7404	24	4077	macromolecule modification	0.0237171	1
GO:2000113	0.994946	0.38581	12.1151	5	1382	negative regulation of cellular macromolecule biosynthetic process	0.0430017	1
GO:0006725	0.995057	0.614322	47.1016	34	5373	cellular aromatic compound metabolic process	0.0193454	1
GO:0022402	0.995214	0.383339	12.1852	5	1390	cell cycle process	0.0425082	1
GO:0046907	0.995412	0.4462	16.5246	8	1885	intracellular transport	0.0369827	1
GO:0045934	0.995562	0.379987	12.2817	5	1401	negative regulation of nucleobase-containing compound metabolic process	0.0418433	1
GO:0034641	0.995687	0.616808	51.6338	38	5890	cellular nitrogen compound metabolic process	0.0179922	1
GO:0043933	0.995972	0.4405	16.7087	8	1906	protein-containing complex subunit organization	0.0361723	1
GO:0008104	0.996224	0.511186	24.6247	14	2809	protein localization	0.0291445	1
GO:0008219	0.996229	0.453632	18.1639	9	2072	cell death	0.0344346	1
GO:0010558	0.996317	0.37198	12.5183	5	1428	negative regulation of macromolecule biosynthetic process	0.0402759	1
GO:0080090	0.996557	0.600217	47.7766	34	5450	regulation of primary metabolic process	0.0188026	1
GO:0010467	0.996928	0.591117	45.8129	32	5226	gene expression	0.0192461	1
GO:0051172	0.997046	0.457696	19.8558	10	2265	negative regulation of nitrogen compound metabolic process	0.0320181	1
GO:0019438	0.997148	0.547602	33.5313	21	3825	aromatic compound biosynthetic process	0.023577	1
GO:0065003	0.997157	0.386534	14.3417	6	1636	protein-containing complex assembly	0.0368228	1
GO:0018130	0.997163	0.547404	33.54	21	3826	heterocycle biosynthetic process	0.0235647	1
GO:0051171	0.997227	0.587336	45.997	32	5247	regulation of nitrogen compound metabolic process	0.0190924	1
GO:0031327	0.997475	0.356844	12.9917	5	1482	negative regulation of cellular biosynthetic process	0.0373943	1
GO:0031324	0.997722	0.460202	21.5565	11	2459	negative regulation of cellular metabolic process	0.0298818	1
GO:0050789	0.997959	0.598152	85.5946	71	9764	regulation of biological process	0.012233	1
GO:0009890	0.997988	0.348386	13.2723	5	1514	negative regulation of biosynthetic process	0.0358303	1
GO:0034654	0.998078	0.527678	33.0053	20	3765	nucleobase-containing compound biosynthetic process	0.0231756	1
GO:0006355	0.998279	0.48966	27.0968	15	3091	regulation of transcription, DNA-templated	0.0257884	1
GO:0042886	0.998507	0.402036	18.0674	8	2061	amide transport	0.0309361	1
GO:0006351	0.998509	0.492563	28.5608	16	3258	transcription, DNA-templated	0.0247599	1
GO:1903506	0.998697	0.480021	27.5176	15	3139	regulation of nucleic acid-templated transcription	0.0250058	1
GO:2001141	0.998719	0.479429	27.5439	15	3142	regulation of RNA biosynthetic process	0.0249581	1
GO:0051649	0.998788	0.459463	25.0805	13	2861	establishment of localization in cell	0.0260879	1
GO:0097659	0.99881	0.484947	28.9027	16	3297	nucleic acid-templated transcription	0.0241776	1
GO:0032774	0.998883	0.482832	28.9991	16	3308	RNA biosynthetic process	0.0240171	1
GO:0033554	0.998928	0.390837	18.5058	8	2111	cellular response to stress	0.029488	1
GO:0006996	0.999038	0.504423	34.1011	20	3890	organelle organization	0.0217101	1
GO:0046483	0.999121	0.546167	46.8561	31	5345	heterocycle metabolic process	0.0178237	1
GO:0010468	0.999139	0.51637	37.818	23	4314	regulation of gene expression	0.0203002	1
GO:0019222	0.999157	0.560782	54.5004	38	6217	regulation of metabolic process	0.0161493	1
GO:2000112	0.99939	0.471287	31.1381	17	3552	regulation of cellular macromolecule biosynthetic process	0.0221327	1
GO:0015833	0.999404	0.354629	17.8045	7	2031	peptide transport	0.0278747	1
GO:0031323	0.999408	0.539676	49.6877	33	5668	regulation of cellular metabolic process	0.0168728	1
GO:0044260	0.999419	0.562189	65.4496	48	7466	cellular macromolecule metabolic process	0.0141448	1
GO:0060255	0.999473	0.536326	49.8718	33	5689	regulation of macromolecule metabolic process	0.0167484	1
GO:0043170	0.999539	0.558647	73.725	56	8410	macromolecule metabolic process	0.0130055	1
GO:0010556	0.999606	0.458708	31.7692	17	3624	regulation of macromolecule biosynthetic process	0.021262	1
GO:0045184	0.999611	0.342696	18.3304	7	2091	establishment of protein localization	0.0262979	1
GO:0031326	0.999617	0.464763	33.0491	18	3770	regulation of cellular biosynthetic process	0.0208028	1
GO:0034645	0.999651	0.490106	39.1943	23	4471	cellular macromolecule biosynthetic process	0.0188995	1
GO:0019219	0.999676	0.453277	32.0498	17	3656	regulation of nucleobase-containing compound metabolic process	0.0208914	1
GO:0044271	0.999677	0.488014	39.3083	23	4484	cellular nitrogen compound biosynthetic process	0.0187901	1
GO:0051252	0.999734	0.432567	29.7968	15	3399	regulation of RNA metabolic process	0.0213266	1
GO:0009889	0.999763	0.45184	33.7329	18	3848	regulation of biosynthetic process	0.019968	1
GO:0015031	0.999778	0.307951	17.4713	6	1993	protein transport	0.0248124	1
GO:0009059	0.99979	0.476645	39.9395	23	4556	macromolecule biosynthetic process	0.0182009	1
GO:0006139	0.999888	0.47785	45.4798	27	5188	nucleobase-containing compound metabolic process	0.0164777	1
GO:0050794	0.999914	0.513656	81.7462	62	9325	regulation of cellular process	0.0117119	1
GO:0016070	0.999992	0.373539	36.8274	17	4201	RNA metabolic process	0.0158225	1
GO:0090304	1	0.320492	40.8862	17	4664	nucleic acid metabolic process	0.012837	1
