# Supplementary material for: An automated feeding system for the African killifish reveals the impact of diet on lifespan and allows scalable assessment of associative learning
Source: eLife. 2022 Nov 10;11:e69008. doi: 10.7554/eLife.69008 (PMC9788828; doi:10.7554/eLife.69008)
Supplement: Figure 5—source data 9. [file elife-69008-fig5-data9.xlsx]

## Sheet: GOBP_sexDEG_DR_mUP_220716
GOBPID	Pvalue	OddsRatio	ExpCount	Count	Size	Term	enrichment	padj
GO:0006082	2.3e-27	3.0284	66.2679	161	1120	organic acid metabolic process	2.33209	5.55e-24
GO:0044281	1.13e-26	2.50041	116.205	231	1964	small molecule metabolic process	1.08814	1.37e-23
GO:0043436	2.82e-26	3.0097	63.842	155	1079	oxoacid metabolic process	2.41904	2.27e-23
GO:0019752	3.41e-25	2.97941	62.067	150	1049	carboxylic acid metabolic process	2.47682	2.05e-22
GO:0032787	1.43e-21	3.26007	40.3524	108	682	monocarboxylic acid metabolic process	4.219	6.9e-19
GO:0044282	1.38e-20	3.76058	27.513	84	465	small molecule catabolic process	7.05876	5.53e-18
GO:0009063	8.02e-20	8.06728	7.21847	40	122	cellular amino acid catabolic process	48.831	2.76e-17
GO:0044283	7.84e-19	2.96664	43.1333	107	729	small molecule biosynthetic process	3.65834	2.36e-16
GO:0046395	2.59e-18	4.55375	16.3303	59	276	carboxylic acid catabolic process	14.0731	6.44e-16
GO:0016054	2.67e-18	4.40944	17.3362	61	293	organic acid catabolic process	12.9107	6.44e-16
GO:1901606	9.29e-18	8.60151	5.85761	34	99	alpha-amino acid catabolic process	63.0323	2.04e-15
GO:0006629	3.09e-15	2.15938	87.0358	161	1471	lipid metabolic process	1.35193	6.21e-13
GO:1901605	1.27e-14	4.6236	12.1886	45	206	alpha-amino acid metabolic process	19.2678	2.35e-12
GO:1901615	5.07e-14	2.80414	34.4948	83	583	organic hydroxy compound metabolic process	4.43707	8.74e-12
GO:0016053	7.44e-14	3.56825	19.1112	57	323	organic acid biosynthetic process	9.92715	1.2e-11
GO:0046394	3.71e-13	3.50203	18.697	55	316	carboxylic acid biosynthetic process	10.0079	5.59e-11
GO:0044255	9.49e-13	2.18598	64.9662	124	1098	cellular lipid metabolic process	1.86884	1.35e-10
GO:0006081	1.46e-11	7.47824	4.31925	23	73	cellular aldehyde metabolic process	78.4218	1.95e-09
GO:0009074	5.69e-11	17.3762	1.59753	14	27	aromatic amino acid family catabolic process	348.944	7.21e-09
GO:0017144	5.98e-11	10.0486	2.78088	18	47	drug metabolic process	148.058	7.21e-09
GO:0016101	1.59e-10	5.30024	6.50845	27	110	diterpenoid metabolic process	40.5446	1.82e-08
GO:0006575	4.76e-10	3.89741	10.7685	35	182	cellular modified amino acid metabolic process	19.1991	5.22e-08
GO:0006631	5.1e-10	2.78383	23.0163	56	389	fatty acid metabolic process	6.72425	5.34e-08
GO:0006721	5.75e-10	4.94086	6.86346	27	116	terpenoid metabolic process	36.4588	5.78e-08
GO:0001523	7.81e-10	5.28028	6.03511	25	102	retinoid metabolic process	43.6611	7.53e-08
GO:0006558	1.15e-09	32.1444	0.887516	10	15	L-phenylalanine metabolic process	807.556	9.53e-08
GO:0006559	1.15e-09	32.1444	0.887516	10	15	L-phenylalanine catabolic process	807.556	9.53e-08
GO:1902221	1.15e-09	32.1444	0.887516	10	15	erythrose 4-phosphate/phosphoenolpyruvate family amino acid metabolic process	807.556	9.53e-08
GO:1902222	1.15e-09	32.1444	0.887516	10	15	erythrose 4-phosphate/phosphoenolpyruvate family amino acid catabolic process	807.556	9.53e-08
GO:0006066	1.96e-09	2.64166	24.4954	57	414	alcohol metabolic process	6.04267	1.57e-07
GO:0009072	3.39e-09	9.6838	2.36671	15	40	aromatic amino acid family metabolic process	170.344	2.64e-07
GO:0019369	5.24e-09	8.336	2.78088	16	47	arachidonic acid metabolic process	131.607	3.95e-07
GO:0001676	7.62e-09	4.81197	6.21261	24	105	long-chain fatty acid metabolic process	39.5537	5.57e-07
GO:0003008	7.95e-09	1.72177	104.549	161	1767	system process	0.936931	5.63e-07
GO:0006520	8.95e-09	2.7346	20.3537	49	344	cellular amino acid metabolic process	7.52375	6.17e-07
GO:0006720	2.27e-08	4.02867	8.04681	27	136	isoprenoid metabolic process	26.5241	1.52e-06
GO:0006805	2.36e-08	5.15533	5.14759	21	87	xenobiotic metabolic process	50.4122	1.54e-06
GO:0120254	2.5e-08	4.66418	6.09428	23	103	olefinic compound metabolic process	39.392	1.59e-06
GO:0071466	5.49e-08	4.85939	5.38427	21	91	cellular response to xenobiotic stimulus	46.0778	3.31e-06
GO:0009065	5.49e-08	10.729	1.77503	12	30	glutamine family amino acid catabolic process	242.267	3.31e-06
GO:0034308	6.72e-08	4.79062	5.44343	21	92	primary alcohol metabolic process	45.0815	3.95e-06
GO:0072330	1.4e-07	3.06407	12.7211	34	215	monocarboxylic acid biosynthetic process	13.3646	8.02e-06
GO:0042737	1.59e-07	11.0535	1.59753	11	27	drug catabolic process	274.17	8.92e-06
GO:0019319	1.99e-07	4.24298	6.27178	22	106	hexose biosynthetic process	35.5767	1.09e-05
GO:0009410	2.13e-07	4.41548	5.79844	21	98	response to xenobiotic stimulus	39.7303	1.14e-05
GO:0043648	2.25e-07	3.89255	7.3368	24	124	dicarboxylic acid metabolic process	28.3611	1.18e-05
GO:0007586	2.63e-07	3.85374	7.39597	24	125	digestion	27.9091	1.35e-05
GO:0042445	2.78e-07	3.08415	11.8927	32	201	hormone metabolic process	14.3917	1.38e-05
GO:0006572	2.81e-07	96.0332	0.414174	6	7	tyrosine catabolic process	2224.9	1.38e-05
GO:0046364	2.98e-07	3.96565	6.92263	23	117	monosaccharide biosynthetic process	30.5289	1.44e-05
GO:0006094	5.15e-07	4.14481	6.09428	21	103	gluconeogenesis	35.9666	2.43e-05
GO:0006570	6.46e-07	18.325	0.887516	8	15	tyrosine metabolic process	646.044	2.99e-05
GO:0033559	6.66e-07	4.25606	5.6801	20	96	unsaturated fatty acid metabolic process	39.4314	3.03e-05
GO:0008610	9.07e-07	1.90146	45.4408	79	768	lipid biosynthetic process	2.43366	4.05e-05
GO:0006536	9.33e-07	6.75035	2.60338	13	44	glutamate metabolic process	122.009	4.09e-05
GO:0042738	1.11e-06	10.0375	1.53836	10	26	exogenous drug catabolic process	268.787	4.8e-05
GO:0019373	1.22e-06	16.0333	0.946684	8	16	epoxygenase P450 pathway	567.812	5.18e-05
GO:0046503	1.58e-06	4.96231	4.02341	16	68	glycerolipid catabolic process	62.872	6.59e-05
GO:0005975	1.78e-06	1.95082	38.6365	69	653	carbohydrate metabolic process	2.94021	7.29e-05
GO:0006006	3.29e-06	2.65782	13.9044	33	235	glucose metabolic process	10.8576	0.000132034
GO:0008202	3.66e-06	2.35671	19.2295	41	325	steroid metabolic process	7.05297	0.00014485
GO:0043650	3.74e-06	12.8248	1.06502	8	18	dicarboxylic acid biosynthetic process	448.642	0.000145542
GO:0006690	3.92e-06	3.88454	5.79844	19	98	icosanoid metabolic process	35.9465	0.000150137
GO:0016042	4.44e-06	2.30906	20.0579	42	339	lipid catabolic process	6.64056	0.000167311
GO:0022600	5.21e-06	3.97976	5.38427	18	91	digestive system process	39.4952	0.000193387
GO:0032501	5.57e-06	1.35377	408.376	473	6902	multicellular organismal process	0.180412	0.00020341
GO:0046487	5.9e-06	16.0166	0.828349	7	14	glyoxylate metabolic process	648.929	0.000210166
GO:0005996	5.93e-06	2.39107	17.5728	38	297	monosaccharide metabolic process	7.82755	0.000210166
GO:0008652	6.86e-06	4.09238	4.97009	17	84	cellular amino acid biosynthetic process	43.7769	0.00023978
GO:0015711	7.33e-06	2.16691	23.2529	46	393	organic anion transport	5.41162	0.000252378
GO:0016051	7.45e-06	2.50246	15.0878	34	255	carbohydrate biosynthetic process	9.50065	0.000253013
GO:0034754	7.77e-06	3.39449	7.1593	21	121	cellular hormone metabolic process	26.0617	0.000260272
GO:0046461	1.03e-05	5.67378	2.72172	12	46	neutral lipid catabolic process	103.043	0.000329601
GO:0046464	1.03e-05	5.67378	2.72172	12	46	acylglycerol catabolic process	103.043	0.000329601
GO:0050892	1.03e-05	5.67378	2.72172	12	46	intestinal absorption	103.043	0.000329601
GO:0019318	1.31e-05	2.39193	16.1528	35	273	hexose metabolic process	8.53292	0.000415982
GO:0015849	1.72e-05	2.16731	21.1821	42	358	organic acid transport	5.9544	0.000538031
GO:0009064	1.76e-05	3.96627	4.79259	16	81	glutamine family amino acid metabolic process	44.3103	0.000542539
GO:1901575	1.83e-05	1.4448	139.458	185	2357	organic substance catabolic process	0.605073	0.000558628
GO:0006639	1.93e-05	3.06566	8.16515	22	138	acylglycerol metabolic process	20.9903	0.000582286
GO:0044242	2.09e-05	2.43952	14.4961	32	245	cellular lipid catabolic process	9.68663	0.000622645
GO:0019433	2.36e-05	6.42	2.07087	10	35	triglyceride catabolic process	148.327	0.000695157
GO:0006091	2.52e-05	1.89449	32.5423	57	550	generation of precursor metabolites and energy	3.42377	0.000731363
GO:0006638	2.73e-05	2.98775	8.34265	22	141	neutral lipid metabolic process	20.1066	0.000776911
GO:0006694	2.74e-05	2.57828	12.0702	28	204	steroid biosynthetic process	12.2251	0.000776911
GO:1901685	2.86e-05	11.2093	1.00585	7	17	glutathione derivative metabolic process	440.104	0.000791432
GO:1901687	2.86e-05	11.2093	1.00585	7	17	glutathione derivative biosynthetic process	440.104	0.000791432
GO:0010817	4.36e-05	1.87488	31.6547	55	535	regulation of hormone levels	3.49148	0.00119321
GO:0042537	4.57e-05	8.0122	1.42003	8	24	benzene-containing compound metabolic process	252.361	0.00120287
GO:0006063	4.57e-05	8.0122	1.42003	8	24	uronic acid metabolic process	252.361	0.00120287
GO:0019585	4.57e-05	8.0122	1.42003	8	24	glucuronate metabolic process	252.361	0.00120287
GO:0044057	4.59e-05	1.79092	37.8674	63	640	regulation of system process	2.7947	0.00120287
GO:0034370	5.05e-05	13.7133	0.769181	6	13	triglyceride-rich lipoprotein particle remodeling	645.089	0.00131006
GO:0043588	5.36e-05	2.2442	16.567	34	280	skin development	7.87985	0.00137403
GO:1903034	5.55e-05	2.51228	11.8927	27	201	regulation of response to wounding	12.143	0.00140775
GO:0019751	5.82e-05	2.82039	8.75683	22	148	polyol metabolic process	18.2496	0.00146128
GO:0009056	6.88e-05	1.37768	168.036	213	2840	catabolic process	0.479842	0.00170978
GO:0016052	7.09e-05	2.42475	12.7211	28	215	carbohydrate catabolic process	11.0062	0.00174548
GO:0097052	7.4e-05	19.9807	0.53251	5	9	L-kynurenine metabolic process	1121.6	0.00179392
GO:0055088	7.44e-05	2.84874	8.28349	21	140	lipid homeostasis	19.4679	0.00179392
GO:1901617	8.06e-05	2.22163	16.212	33	274	organic hydroxy compound biosynthetic process	7.98671	0.00192418
GO:0046942	8.33e-05	2.13406	18.342	36	310	carboxylic acid transport	6.80666	0.0019696
GO:0006641	8.59e-05	3.11956	6.56762	18	111	triglyceride metabolic process	26.5449	0.00200682
GO:0019637	8.7e-05	1.56836	65.5579	96	1108	organophosphate metabolic process	1.42084	0.00200682
GO:0030033	8.74e-05	7.12097	1.53836	8	26	microvillus assembly	215.03	0.00200682
GO:1901135	9.09e-05	1.55236	68.9896	100	1166	carbohydrate derivative metabolic process	1.33647	0.00206751
GO:0010951	9.35e-05	2.47405	11.5969	26	196	negative regulation of endopeptidase activity	12.2975	0.00210634
GO:0030258	9.96e-05	2.19385	16.3895	33	277	lipid modification	7.81465	0.00222377
GO:0042572	0.000104436	5.17527	2.42588	10	41	retinol metabolic process	108.09	0.00229823
GO:1901564	0.000104855	1.29215	392.578	447	6635	organonitrogen compound metabolic process	0.184493	0.00229823
GO:0055086	0.000105848	1.72477	39.7607	64	672	nucleobase-containing small molecule metabolic process	2.57511	0.0022991
GO:0045777	0.000107044	4.64703	2.89922	11	49	positive regulation of blood pressure	83.2445	0.00230431
GO:0052695	0.000133021	10.6645	0.887516	6	15	cellular glucuronidation	484.533	0.00283818
GO:0046146	0.000140745	15.9834	0.591678	5	10	tetrahydrobiopterin metabolic process	908.5	0.00292532
GO:0006729	0.000140745	15.9834	0.591678	5	10	tetrahydrobiopterin biosynthetic process	908.5	0.00292532
GO:0034371	0.000140745	15.9834	0.591678	5	10	chylomicron remodeling	908.5	0.00292532
GO:0042493	0.000146903	1.85822	27.7497	48	469	response to drug	3.96507	0.00302721
GO:0032528	0.000149174	5.54922	2.07087	9	35	microvillus organization	133.494	0.00304796
GO:0072521	0.000156015	1.82814	29.3472	50	496	purine-containing compound metabolic process	3.69285	0.00312808
GO:0008210	0.000156429	6.40798	1.6567	8	28	estrogen metabolic process	185.408	0.00312808
GO:0044275	0.000156988	4.41407	3.01756	11	51	cellular carbohydrate catabolic process	76.8435	0.00312808
GO:0010466	0.000166947	2.37504	12.0111	26	203	negative regulation of peptidase activity	11.464	0.00329925
GO:0061041	0.00017111	2.59195	9.40767	22	159	regulation of wound healing	15.8119	0.00335404
GO:0072329	0.000183752	2.64678	8.81599	21	149	monocarboxylic acid catabolic process	17.1871	0.00357279
GO:1901607	0.000204045	3.66463	4.14174	13	70	alpha-amino acid biosynthetic process	48.2061	0.00393562
GO:0090303	0.000236473	3.6012	4.20091	13	71	positive regulation of wound healing	46.8578	0.00452489
GO:0046337	0.000265061	5.82463	1.77503	8	30	phosphatidylethanolamine metabolic process	161.511	0.00498825
GO:0006688	0.000265061	5.82463	1.77503	8	30	glycosphingolipid biosynthetic process	161.511	0.00498825
GO:0030324	0.000266895	2.29621	12.3661	26	209	lung development	10.8152	0.00498825
GO:0042558	0.000293473	4.97413	2.24837	9	38	pteridine-containing compound metabolic process	113.248	0.00544279
GO:0042559	0.000296934	8.72426	1.00585	6	17	pteridine-containing compound biosynthetic process	377.232	0.00546494
GO:0019674	0.00032372	3.70516	3.78674	12	64	NAD metabolic process	53.2324	0.0059128
GO:0006112	0.000346287	2.95878	6.09428	16	103	energy reserve metabolic process	27.4031	0.00627742
GO:0030323	0.000360024	2.24646	12.6027	26	213	respiratory tube development	10.4128	0.00647774
GO:0018958	0.000390413	3.05304	5.56177	15	94	phenol-containing compound metabolic process	30.8454	0.00697084
GO:0035090	0.000400342	11.4152	0.710013	5	12	maintenance of apical/basal cell polarity	630.903	0.00697084
GO:0006538	0.000400342	11.4152	0.710013	5	12	glutamate catabolic process	630.903	0.00697084
GO:0045199	0.000400342	11.4152	0.710013	5	12	maintenance of epithelial cell apical/basal polarity	630.903	0.00697084
GO:0008217	0.000401886	2.36393	10.6502	23	180	regulation of blood pressure	12.8985	0.00697084
GO:0042221	0.000447642	1.28059	257.143	302	4346	response to chemical	0.290524	0.00770903
GO:0050877	0.000459952	1.54451	54.316	79	918	nervous system process	1.70332	0.00786485
GO:0001944	0.000481746	1.55955	51.0618	75	863	vasculature development	1.82976	0.00817951
GO:0060541	0.000558748	2.13833	13.6678	27	231	respiratory system development	9.19379	0.00942057
GO:0031667	0.000566497	1.71671	31.0039	50	524	response to nutrient levels	3.30874	0.0094849
GO:1901616	0.000577496	3.43955	4.02341	12	68	organic hydroxy compound catabolic process	47.154	0.00960236
GO:0042403	0.0005878	7.38104	1.12419	6	19	thyroid hormone metabolic process	301.994	0.00967475
GO:0000096	0.000589875	4.00833	2.95839	10	50	sulfur amino acid metabolic process	72.68	0.00967475
GO:0009913	0.000597699	2.12775	13.7269	27	232	epidermal cell differentiation	9.11471	0.00973684
GO:0043129	0.000618972	9.98757	0.769181	5	13	surfactant homeostasis	537.574	0.0098168
GO:0019227	0.000618972	9.98757	0.769181	5	13	neuronal action potential propagation	537.574	0.0098168
GO:0098870	0.000618972	9.98757	0.769181	5	13	action potential propagation	537.574	0.0098168
GO:0006547	0.000618972	9.98757	0.769181	5	13	histidine metabolic process	537.574	0.0098168
GO:1903036	0.000622966	3.0397	5.20676	14	88	positive regulation of response to wounding	32.8487	0.0098168
GO:0000272	0.000666076	4.92717	2.0117	8	34	polysaccharide catabolic process	125.744	0.010428
GO:0006090	0.000719302	2.30309	10.4135	22	176	pyruvate metabolic process	12.9048	0.0111886
GO:0009611	0.000727428	1.57852	44.3166	66	749	response to wounding	2.13764	0.0112425
GO:0009991	0.000733811	1.67597	32.9564	52	557	response to extracellular stimulus	3.04542	0.0112689
GO:0008544	0.00077411	1.88933	19.8212	35	335	epidermis development	5.66674	0.0117456
GO:0019400	0.000774598	5.60078	1.59753	7	27	alditol metabolic process	174.472	0.0117456
GO:0008285	0.000780803	1.56284	46.0917	68	779	negative regulation of cell population proliferation	2.03605	0.0117461
GO:0042632	0.000784373	3.11551	4.73342	13	80	cholesterol homeostasis	36.9078	0.0117461
GO:0034368	0.000798008	6.85335	1.18336	6	20	protein-lipid complex remodeling	272.55	0.0117632
GO:0034369	0.000798008	6.85335	1.18336	6	20	plasma lipoprotein particle remodeling	272.55	0.0117632
GO:0006790	0.000804691	1.81704	22.8979	39	387	sulfur compound metabolic process	4.73149	0.0117632
GO:0065008	0.000805033	1.26815	247.854	290	4189	regulation of biological quality	0.300284	0.0117632
GO:0072376	0.000819232	4.74435	2.07087	8	35	protein activation cascade	118.661	0.0118273
GO:0072378	0.000819232	4.74435	2.07087	8	35	blood coagulation, fibrin clot formation	118.661	0.0118273
GO:0009117	0.000824135	1.64954	34.7315	54	587	nucleotide metabolic process	2.84756	0.0118273
GO:0055092	0.000884752	3.06948	4.79259	13	81	sterol homeostasis	36.0021	0.0126221
GO:0070189	0.000916173	8.87723	0.828349	5	14	kynurenine metabolic process	463.52	0.0129935
GO:0072337	0.000980655	5.3337	1.6567	7	28	modified amino acid transport	162.232	0.0138267
GO:0044248	0.00099276	1.31784	146.44	181	2475	cellular catabolic process	0.536887	0.013916
GO:0006753	0.00100125	1.63362	35.0273	54	592	nucleoside phosphate metabolic process	2.79966	0.0139539
GO:0042180	0.00103413	1.98535	15.6795	29	265	cellular ketone metabolic process	7.50345	0.0143293
GO:0046165	0.00104784	2.22989	10.7094	22	181	alcohol biosynthetic process	12.2017	0.0144362
GO:0042762	0.00106179	6.39602	1.24252	6	21	regulation of sulfur metabolic process	247.211	0.0144631
GO:0034367	0.00106179	6.39602	1.24252	6	21	protein-containing complex remodeling	247.211	0.0144631
GO:0006163	0.00116356	1.7027	28.0455	45	474	purine nucleotide metabolic process	3.63924	0.0157604
GO:1900048	0.00122748	5.09091	1.71586	7	29	positive regulation of hemostasis	151.237	0.0164414
GO:0030194	0.00122748	5.09091	1.71586	7	29	positive regulation of blood coagulation	151.237	0.0164414
GO:0006000	0.00130775	7.98895	0.887516	5	15	fructose metabolic process	403.778	0.0173249
GO:0019395	0.00130781	2.57181	6.86346	16	116	fatty acid oxidation	21.6052	0.0173249
GO:0006633	0.00137669	2.33412	8.87516	19	150	fatty acid biosynthetic process	15.3436	0.0180434
GO:0006793	0.00138068	1.276	192.118	229	3247	phosphorus metabolic process	0.394662	0.0180434
GO:0001573	0.00138762	5.99585	1.30169	6	22	ganglioside metabolic process	225.248	0.0180434
GO:1900046	0.00140046	2.89815	5.02926	13	85	regulation of hemostasis	32.6934	0.0180434
GO:0030193	0.00140046	2.89815	5.02926	13	85	regulation of blood coagulation	32.6934	0.0180434
GO:1901565	0.00140695	1.38811	86.0299	113	1454	organonitrogen compound catabolic process	0.971191	0.0180434
GO:0042402	0.00145436	4.26903	2.24837	8	38	cellular biogenic amine catabolic process	100.665	0.0185527
GO:0072524	0.00148318	3.48406	3.31339	10	56	pyridine-containing compound metabolic process	57.9401	0.0187222
GO:0008206	0.00148318	3.48406	3.31339	10	56	bile acid metabolic process	57.9401	0.0187222
GO:0009150	0.00150883	1.71081	26.0338	42	440	purine ribonucleotide metabolic process	3.94184	0.0189469
GO:0050820	0.00152039	4.86923	1.77503	7	30	positive regulation of coagulation	141.322	0.0189578
GO:0019693	0.00152543	1.68724	27.6313	44	467	ribose phosphate metabolic process	3.66584	0.0189578
GO:0051239	0.00164468	1.28765	163.776	198	2768	regulation of multicellular organismal process	0.469557	0.020335
GO:0003013	0.00167812	1.59841	35.0273	53	592	circulatory system process	2.74781	0.0206426
GO:0009310	0.00173633	4.13103	2.30754	8	39	amine catabolic process	95.5687	0.0211428
GO:0006040	0.00173633	4.13103	2.30754	8	39	amino sugar metabolic process	95.5687	0.0211428
GO:0006071	0.00178447	5.64276	1.36086	6	23	glycerol metabolic process	206.087	0.0216067
GO:0006534	0.00181027	7.26218	0.946684	5	16	cysteine metabolic process	354.883	0.0216067
GO:0044241	0.00181027	7.26218	0.946684	5	16	lipid digestion	354.883	0.0216067
GO:0048875	0.00181027	7.26218	0.946684	5	16	chemical homeostasis within a tissue	354.883	0.0216067
GO:0051968	0.00186499	4.66602	1.8342	7	31	positive regulation of synaptic transmission, glutamatergic	132.352	0.0220417
GO:0034311	0.00186499	4.66602	1.8342	7	31	diol metabolic process	132.352	0.0220417
GO:0009066	0.00195343	3.33843	3.43173	10	58	aspartate family amino acid metabolic process	54.0131	0.0229136
GO:0022900	0.00195777	2.15352	10.5319	21	178	electron transport chain	12.043	0.0229136
GO:0040011	0.00200253	1.32327	117.507	147	1986	locomotion	0.677195	0.0233242
GO:0052548	0.00206547	1.7277	23.3121	38	394	regulation of endopeptidase activity	4.44781	0.0238574
GO:0008283	0.00206811	1.32084	118.513	148	2003	cell population proliferation	0.670278	0.0238574
GO:0001568	0.0021042	1.4904	48.7542	69	824	blood vessel development	1.8465	0.0241582
GO:0050818	0.00214436	2.74485	5.26593	13	89	regulation of coagulation	29.8207	0.0245027
GO:0034637	0.00222046	2.61337	5.91678	14	100	cellular carbohydrate biosynthetic process	25.438	0.0252161
GO:0034440	0.00222772	2.42522	7.21847	16	122	lipid oxidation	19.5324	0.0252161
GO:0052547	0.00225032	1.68118	25.7971	41	436	regulation of peptidase activity	3.91891	0.0253528
GO:0006796	0.00227044	1.26167	190.165	225	3214	phosphate-containing compound metabolic process	0.395773	0.0254606
GO:0048513	0.00241408	1.2502	211.17	247	3569	animal organ development	0.352337	0.0267492
GO:0003401	0.00242877	3.88013	2.42588	8	41	axis elongation	86.4723	0.0267492
GO:0098856	0.00244082	6.65654	1.00585	5	17	intestinal lipid absorption	314.36	0.0267492
GO:0006590	0.00244082	6.65654	1.00585	5	17	thyroid hormone generation	314.36	0.0267492
GO:0050667	0.00244082	6.65654	1.00585	5	17	homocysteine metabolic process	314.36	0.0267492
GO:0006687	0.00249462	2.83021	4.73342	12	80	glycosphingolipid metabolic process	34.0688	0.0272151
GO:0009888	0.00266939	1.30813	121.116	150	2047	tissue development	0.650445	0.0289906
GO:0006898	0.0026978	1.80704	18.2237	31	308	receptor-mediated endocytosis	5.93766	0.0291677
GO:0042219	0.00273301	4.3065	1.95254	7	33	cellular modified amino acid catabolic process	116.795	0.0294164
GO:0016125	0.00274636	2.08632	10.8277	21	183	sterol metabolic process	11.3939	0.0294288
GO:0046173	0.0027746	2.789	4.79259	12	81	polyol biosynthetic process	33.2327	0.0295998
GO:0042573	0.00282905	5.04809	1.47919	6	25	retinoic acid metabolic process	174.432	0.0298465
GO:0043651	0.00282905	5.04809	1.47919	6	25	linoleic acid metabolic process	174.432	0.0298465
GO:0008015	0.00283736	1.57541	33.4298	50	565	blood circulation	2.84596	0.0298465
GO:0033344	0.00284758	3.76575	2.48505	8	42	cholesterol efflux	82.4036	0.0298465
GO:0006672	0.00285962	2.35798	7.39597	16	125	ceramide metabolic process	18.6061	0.0298465
GO:0042127	0.00293216	1.32969	101.414	128	1714	regulation of cell population proliferation	0.791668	0.0303531
GO:0009259	0.00293334	1.64282	26.9805	42	456	ribonucleotide metabolic process	3.67007	0.0303531
GO:0016477	0.00299166	1.33426	97.8635	124	1654	cell migration	0.82358	0.0308243
GO:0048514	0.00303692	1.49654	43.5475	62	736	blood vessel morphogenesis	2.07965	0.0311575
GO:0060395	0.00307955	2.74897	4.85176	12	82	SMAD protein signal transduction	32.4271	0.031461
GO:0030216	0.00312474	2.15166	9.52601	19	161	keratinocyte differentiation	13.3185	0.031788
GO:0005977	0.00318637	2.60688	5.5026	13	93	glycogen metabolic process	27.3107	0.0320097
GO:0006073	0.00318637	2.60688	5.5026	13	93	cellular glucan metabolic process	27.3107	0.0320097
GO:0044042	0.00318637	2.60688	5.5026	13	93	glucan metabolic process	27.3107	0.0320097
GO:0033002	0.00324962	1.91821	13.9044	25	235	muscle cell proliferation	8.22544	0.0321408
GO:0045661	0.00325274	3.08077	3.6684	10	62	regulation of myoblast differentiation	47.2685	0.0321408
GO:0042398	0.00325274	3.08077	3.6684	10	62	cellular modified amino acid biosynthetic process	47.2685	0.0321408
GO:0019320	0.00325274	3.08077	3.6684	10	62	hexose catabolic process	47.2685	0.0321408
GO:0060441	0.00326888	4.14671	2.0117	7	34	epithelial tube branching involved in lung morphogenesis	110.026	0.0321684
GO:1901071	0.00349646	4.79535	1.53836	6	26	glucosamine-containing compound metabolic process	161.272	0.0340548
GO:0009068	0.00349646	4.79535	1.53836	6	26	aspartate family amino acid catabolic process	161.272	0.0340548
GO:0006665	0.00350294	2.0006	11.7744	22	199	sphingolipid metabolic process	10.0942	0.0340548
GO:0046164	0.00360301	3.275	3.13589	9	53	alcohol catabolic process	58.2164	0.0347474
GO:0006775	0.00360301	3.275	3.13589	9	53	fat-soluble vitamin metabolic process	58.2164	0.0347474
GO:0030855	0.00365427	1.50297	40.5299	58	685	epithelial cell differentiation	2.24596	0.0351014
GO:0007584	0.00375195	1.92298	13.3127	24	225	response to nutrient	8.61393	0.0358966
GO:1905039	0.00381573	2.15889	8.9935	18	152	carboxylic acid transmembrane transport	14.156	0.0362194
GO:1903825	0.00381573	2.15889	8.9935	18	152	organic acid transmembrane transport	14.156	0.0362194
GO:0006576	0.00383106	2.44192	6.27178	14	106	cellular biogenic amine metabolic process	22.6397	0.0362223
GO:0044272	0.0038601	1.94885	12.6027	23	213	sulfur compound biosynthetic process	9.21136	0.0363543
GO:0030903	0.00415575	5.70481	1.12419	5	19	notochord development	251.662	0.0388354
GO:0006646	0.00415575	5.70481	1.12419	5	19	phosphatidylethanolamine biosynthetic process	251.662	0.0388354
GO:0060602	0.00427414	4.56669	1.59753	6	27	branch elongation of an epithelium	149.547	0.0397874
GO:0045861	0.00435174	1.74285	18.8153	31	318	negative regulation of proteolysis	5.57009	0.040354
GO:0051674	0.00444898	1.30659	105.378	131	1781	localization of cell	0.75041	0.0408209
GO:0048870	0.00444898	1.30659	105.378	131	1781	cell motility	0.75041	0.0408209
GO:1901136	0.00445288	1.95584	12.0111	22	203	carbohydrate derivative catabolic process	9.70031	0.0408209
GO:0051591	0.00454238	2.38963	6.39012	14	108	response to cAMP	21.809	0.0411752
GO:0097746	0.00457095	2.23402	7.75098	16	131	blood vessel diameter maintenance	16.9407	0.0411752
GO:0035150	0.00457095	2.23402	7.75098	16	131	regulation of tube size	16.9407	0.0411752
GO:0035296	0.00457095	2.23402	7.75098	16	131	regulation of tube diameter	16.9407	0.0411752
GO:0032094	0.00457691	3.8602	2.13004	7	36	response to food	98.1404	0.0411752
GO:0009887	0.00460893	1.37562	67.8062	89	1146	animal organ morphogenesis	1.23133	0.0413091
GO:0031099	0.00476211	1.85542	14.3186	25	242	regeneration	7.75647	0.0425239
GO:0072662	0.00491274	2.71165	4.49675	11	76	protein localization to peroxisome	34.6035	0.0433869
GO:0072663	0.00491274	2.71165	4.49675	11	76	establishment of protein localization to peroxisome	34.6035	0.0433869
GO:0006625	0.00491274	2.71165	4.49675	11	76	protein targeting to peroxisome	34.6035	0.0433869
GO:0072359	0.0049641	1.35375	75.0839	97	1269	circulatory system development	1.09447	0.043525
GO:0035295	0.00496448	1.36433	70.6463	92	1194	tube development	1.17256	0.043525
GO:0051384	0.00502383	2.09573	9.23017	18	156	response to glucocorticoid	13.4393	0.0438346
GO:0070371	0.00503616	1.74035	18.2237	30	308	ERK1 and ERK2 cascade	5.74612	0.0438346
GO:0006699	0.00511087	3.36842	2.72172	8	46	bile acid biosynthetic process	68.6957	0.0443248
GO:0046174	0.00517236	4.35881	1.6567	6	28	polyol catabolic process	139.056	0.0446974
GO:0005978	0.00525978	3.06532	3.31339	9	56	glycogen biosynthetic process	52.146	0.0447818
GO:0009250	0.00525978	3.06532	3.31339	9	56	glucan biosynthetic process	52.146	0.0447818
GO:0006734	0.00525978	3.06532	3.31339	9	56	NADH metabolic process	52.146	0.0447818
GO:0031649	0.005275	5.32413	1.18336	5	20	heat generation	227.125	0.0447818
GO:0034312	0.005275	5.32413	1.18336	5	20	diol biosynthetic process	227.125	0.0447818
GO:0046486	0.00555698	1.58608	27.158	41	459	glycerolipid metabolic process	3.53601	0.0470101
GO:0005976	0.00569765	2.17677	7.92848	16	134	polysaccharide metabolic process	16.1907	0.0480316
GO:0046365	0.00575307	2.80955	3.96424	10	67	monosaccharide catabolic process	40.4767	0.0483298
GO:1903035	0.0058062	2.31524	6.56762	14	111	negative regulation of response to wounding	20.6461	0.0486067
GO:1903522	0.00603988	1.71518	18.4603	30	312	regulation of blood circulation	5.59973	0.0503881
GO:0006766	0.00612218	2.05071	9.40767	18	159	vitamin metabolic process	12.937	0.0507236
GO:0030856	0.00612218	2.05071	9.40767	18	159	regulation of epithelial cell differentiation	12.937	0.0507236
GO:0005980	0.00620146	4.16901	1.71586	6	29	glycogen catabolic process	129.631	0.0508562
GO:0009251	0.00620146	4.16901	1.71586	6	29	glucan catabolic process	129.631	0.0508562
GO:0044247	0.00620146	4.16901	1.71586	6	29	cellular polysaccharide catabolic process	129.631	0.0508562
GO:0030282	0.00656664	2.14019	8.04681	16	136	bone mineralization	15.718	0.0534332
GO:0046185	0.00659163	4.99102	1.24252	5	21	aldehyde catabolic process	206.009	0.0534332
GO:0006577	0.00659163	4.99102	1.24252	5	21	amino-acid betaine metabolic process	206.009	0.0534332
GO:0043574	0.00660435	2.59147	4.67425	11	79	peroxisomal transport	32.0253	0.0534332
GO:0072523	0.00665596	2.93979	3.43173	9	58	purine-containing compound catabolic process	48.6118	0.0535371
GO:0072525	0.00666161	3.19956	2.84005	8	48	pyridine-containing compound biosynthetic process	63.0903	0.0535371
GO:0042060	0.00678401	1.4969	34.9681	50	591	wound healing	2.60106	0.0543397
GO:0044262	0.00708827	1.67721	19.4662	31	329	cellular carbohydrate metabolic process	5.20385	0.0565888
GO:0044058	0.00737173	3.99502	1.77503	6	30	regulation of digestive system process	121.133	0.0584646
GO:0006760	0.00737173	3.99502	1.77503	6	30	folic acid-containing compound metabolic process	121.133	0.0584646
GO:0035265	0.00779537	1.85214	12.6027	22	213	organ growth	8.81086	0.0614556
GO:0051346	0.00779984	1.58867	24.4363	37	413	negative regulation of hydrolase activity	3.94145	0.0614556
GO:0061045	0.00787662	2.40367	5.44343	12	92	negative regulation of wound healing	25.7609	0.0618584
GO:0001892	0.00804375	2.14854	7.5143	15	127	embryonic placenta development	16.8981	0.062765
GO:0001502	0.00812222	4.69711	1.30169	5	22	cartilage condensation	187.707	0.062765
GO:0043649	0.00812222	4.69711	1.30169	5	22	dicarboxylic acid catabolic process	187.707	0.062765
GO:0000097	0.00812222	4.69711	1.30169	5	22	sulfur amino acid biosynthetic process	187.707	0.062765
GO:0030011	0.00812222	4.69711	1.30169	5	22	maintenance of cell polarity	187.707	0.062765
GO:0045445	0.00828625	2.29001	6.15345	13	104	myoblast differentiation	21.8389	0.0633424
GO:0060043	0.00832009	2.82412	3.55007	9	60	regulation of cardiac muscle cell proliferation	45.425	0.0633424
GO:0019934	0.0083283	3.39136	2.36671	7	40	cGMP-mediated signaling	79.4938	0.0633424
GO:0010837	0.0083283	3.39136	2.36671	7	40	regulation of keratinocyte proliferation	79.4938	0.0633424
GO:0034377	0.0083283	3.39136	2.36671	7	40	plasma lipoprotein particle assembly	79.4938	0.0633424
GO:0015980	0.00846113	1.70171	17.3362	28	293	energy derivation by oxidation of organic compounds	5.92622	0.0641503
GO:0051248	0.00852494	1.34721	65.8537	85	1113	negative regulation of protein metabolic process	1.24676	0.0644315
GO:0060429	0.00880522	1.33029	72.1847	92	1220	epithelium development	1.12311	0.0663419
GO:1900047	0.00926213	2.76961	3.60923	9	61	negative regulation of hemostasis	43.9479	0.0693509
GO:0030195	0.00926213	2.76961	3.60923	9	61	negative regulation of blood coagulation	43.9479	0.0693509
GO:0072073	0.00945454	1.95276	9.82185	18	166	kidney epithelium development	11.8689	0.0705724
GO:0045604	0.00953234	2.44682	4.91092	11	83	regulation of epidermal cell differentiation	29.0129	0.0706129
GO:0009112	0.00954291	3.29138	2.42588	7	41	nucleobase metabolic process	75.6633	0.0706129
GO:0071385	0.00954782	2.58208	4.26008	10	72	cellular response to glucocorticoid stimulus	35.0502	0.0706129
GO:0071827	0.00962242	2.97571	3.01756	8	51	plasma lipoprotein particle organization	55.8862	0.0709469
GO:0055085	0.00970602	1.29186	90.5267	112	1530	transmembrane transport	0.869341	0.0713451
GO:0070372	0.00979783	1.69777	16.7445	27	283	regulation of ERK1 and ERK2 cascade	6.12556	0.0717687
GO:0042430	0.00988271	4.43585	1.36086	5	23	indole-containing compound metabolic process	171.739	0.0717687
GO:0017014	0.00988271	4.43585	1.36086	5	23	protein nitrosylation	171.739	0.0717687
GO:0018119	0.00988271	4.43585	1.36086	5	23	peptidyl-cysteine S-nitrosylation	171.739	0.0717687
GO:0015718	0.0100455	1.83405	12.1294	21	205	monocarboxylic acid transport	9.0796	0.0727316
GO:0042446	0.0102826	2.71717	3.6684	9	62	hormone biosynthetic process	42.5416	0.0742255
GO:0060840	0.0105877	2.13765	7.04096	14	119	artery development	17.9634	0.0762001
GO:0032269	0.0106603	1.34204	62.8953	81	1063	negative regulation of cellular protein metabolic process	1.30249	0.0764938
GO:0046434	0.0111667	2.00531	8.52016	16	144	organophosphate catabolic process	14.0201	0.0798896
GO:0008203	0.0112675	1.91357	9.99935	18	169	cholesterol metabolic process	11.4513	0.0802873
GO:0046470	0.0113281	2.38036	5.02926	11	85	phosphatidylcholine metabolic process	27.6637	0.0802873
GO:0097237	0.0113554	2.11733	7.10013	14	120	cellular response to toxic substance	17.6653	0.0802873
GO:0044264	0.0113554	2.11733	7.10013	14	120	cellular polysaccharide metabolic process	17.6653	0.0802873
GO:0061572	0.0117317	1.80424	12.3069	21	208	actin filament bundle organization	8.81957	0.0821276
GO:0046688	0.0118304	3.55039	1.95254	6	33	response to copper ion	100.11	0.0821276
GO:0000038	0.0118304	3.55039	1.95254	6	33	very long-chain fatty acid metabolic process	100.11	0.0821276
GO:0042044	0.0118882	4.20209	1.42003	5	24	fluid transport	157.726	0.0821276
GO:0042759	0.0118882	4.20209	1.42003	5	24	long-chain fatty acid biosynthetic process	157.726	0.0821276
GO:0009067	0.0118882	4.20209	1.42003	5	24	aspartate family amino acid biosynthetic process	157.726	0.0821276
GO:0044062	0.0118882	4.20209	1.42003	5	24	regulation of excretion	157.726	0.0821276
GO:0010544	0.0118882	4.20209	1.42003	5	24	negative regulation of platelet activation	157.726	0.0821276
GO:0098656	0.0120512	1.48085	31.0039	44	524	anion transmembrane transport	2.91169	0.0827559
GO:0006749	0.0120779	2.84306	3.13589	8	53	glutathione metabolic process	51.748	0.0827559
GO:0030148	0.0120822	2.03844	7.86931	15	133	sphingolipid biosynthetic process	15.4079	0.0827559
GO:1902652	0.0121501	1.86016	10.8277	19	183	secondary alcohol metabolic process	10.3088	0.0828584
GO:0009062	0.0121658	2.0974	7.1593	14	121	fatty acid catabolic process	17.3745	0.0828584
GO:0048660	0.012315	1.93461	9.3485	17	158	regulation of smooth muscle cell proliferation	12.3734	0.0834202
GO:0042246	0.0123175	2.34846	5.08843	11	86	tissue regeneration	27.0241	0.0834202
GO:0060711	0.0125741	2.618	3.78674	9	64	labyrinthine layer development	39.9243	0.0846182
GO:0050819	0.0125741	2.618	3.78674	9	64	negative regulation of coagulation	39.9243	0.0846182
GO:0071384	0.0125997	2.46239	4.43758	10	75	cellular response to corticosteroid stimulus	32.3022	0.0846182
GO:0048659	0.0130564	1.92086	9.40767	17	159	smooth muscle cell proliferation	12.2183	0.0874413
GO:0098754	0.0139209	2.05863	7.27763	14	123	detoxification	16.8141	0.0914825
GO:0035239	0.01393	1.33594	59.1678	76	1000	tube morphogenesis	1.38092	0.0914825
GO:0019363	0.0139603	3.02388	2.60338	7	44	pyridine nucleotide biosynthetic process	65.6973	0.0914825
GO:0019359	0.0139603	3.02388	2.60338	7	44	nicotinamide nucleotide biosynthetic process	65.6973	0.0914825
GO:0065005	0.0139603	3.02388	2.60338	7	44	protein-lipid complex assembly	65.6973	0.0914825
GO:0003416	0.0139603	3.02388	2.60338	7	44	endochondral bone growth	65.6973	0.0914825
GO:0070633	0.0139603	3.02388	2.60338	7	44	transepithelial transport	65.6973	0.0914825
GO:0031960	0.0141022	1.86366	10.236	18	173	response to corticosteroid	10.9279	0.0914825
GO:0007600	0.0141321	1.50155	27.0988	39	458	sensory perception	3.37823	0.0914825
GO:0006144	0.014153	3.99171	1.47919	5	25	purine nucleobase metabolic process	145.36	0.0914825
GO:0098743	0.014153	3.99171	1.47919	5	25	cell aggregation	145.36	0.0914825
GO:0044342	0.014153	3.99171	1.47919	5	25	type B pancreatic cell proliferation	145.36	0.0914825
GO:0008209	0.014153	3.99171	1.47919	5	25	androgen metabolic process	145.36	0.0914825
GO:0048869	0.0142612	1.18122	250.635	280	4236	cellular developmental process	0.283531	0.0919355
GO:0048844	0.0144921	2.28714	5.20676	11	88	artery morphogenesis	25.8097	0.0931744
GO:0050878	0.0149117	1.45884	31.4181	44	531	regulation of body fluid levels	2.83543	0.094971
GO:0071825	0.014965	2.72171	3.25423	8	55	protein-lipid complex subunit organization	48.0529	0.094971
GO:0001754	0.014965	2.72171	3.25423	8	55	eye photoreceptor cell differentiation	48.0529	0.094971
GO:1990748	0.0149671	2.10379	6.62679	13	112	cellular detoxification	18.8305	0.094971
GO:0051604	0.0149841	1.6328	17.3362	27	293	protein maturation	5.71457	0.094971
GO:0007585	0.0150079	2.38856	4.55592	10	77	respiratory gaseous exchange by respiratory system	30.646	0.094971
GO:0060425	0.0152253	2.52579	3.90507	9	66	lung morphogenesis	37.5413	0.0960946
GO:1901700	0.0153624	1.24822	107.685	129	1820	response to oxygen-containing compound	0.707623	0.0967072
GO:0006643	0.0154716	1.70314	14.2003	23	240	membrane lipid metabolic process	7.25538	0.0971404
GO:0060045	0.0156892	3.30508	2.07087	6	35	positive regulation of cardiac muscle cell proliferation	88.9959	0.0972298
GO:0042133	0.0156892	3.30508	2.07087	6	35	neurotransmitter metabolic process	88.9959	0.0972298
GO:0045907	0.0156892	3.30508	2.07087	6	35	positive regulation of vasoconstriction	88.9959	0.0972298
GO:0120178	0.0157127	2.9441	2.66255	7	45	steroid hormone biosynthetic process	62.8099	0.0972298
GO:0006953	0.0157127	2.9441	2.66255	7	45	acute-phase response	62.8099	0.0972298
GO:0042391	0.0157278	1.50629	25.6196	37	433	regulation of membrane potential	3.58576	0.0972298
GO:0015850	0.0163932	1.71547	13.4902	22	228	organic hydroxy compound transport	7.68967	0.100882
GO:0031214	0.0165737	1.82789	10.4135	18	176	biomineral tissue development	10.5585	0.100882
GO:0110148	0.0165737	1.82789	10.4135	18	176	biomineralization	10.5585	0.100882
GO:0045956	0.0166903	3.80137	1.53836	5	26	positive regulation of calcium ion-dependent exocytosis	134.393	0.100882
GO:0009110	0.0166903	3.80137	1.53836	5	26	vitamin biosynthetic process	134.393	0.100882
GO:0006085	0.0166903	3.80137	1.53836	5	26	acetyl-CoA biosynthetic process	134.393	0.100882
GO:0051004	0.0166903	3.80137	1.53836	5	26	regulation of lipoprotein lipase activity	134.393	0.100882
GO:0071320	0.0166951	2.48207	3.96424	9	67	cellular response to cAMP	36.429	0.100882
GO:0009247	0.0166951	2.48207	3.96424	9	67	glycolipid biosynthetic process	36.429	0.100882
GO:0007031	0.016944	2.22893	5.3251	11	90	peroxisome organization	24.6753	0.10213
GO:0007167	0.0174826	1.29484	70.5871	88	1193	enzyme linked receptor protein signaling pathway	1.12346	0.105114
GO:0070373	0.017743	2.319	4.67425	10	79	negative regulation of ERK1 and ERK2 cascade	29.1139	0.106414
GO:0007589	0.0182801	2.20092	5.38427	11	91	body fluid secretion	24.136	0.109163
GO:0002063	0.0183223	2.61025	3.37256	8	57	chondrocyte development	44.7399	0.109163
GO:0051017	0.0183371	1.74475	12.0702	20	204	actin filament bundle assembly	8.73222	0.109163
GO:0035249	0.0184403	2.11151	6.09428	12	103	synaptic transmission, glutamatergic	20.5524	0.109506
GO:0090407	0.0191459	1.38618	39.7016	53	671	organophosphate biosynthetic process	2.13888	0.113417
GO:0046496	0.019675	2.79651	2.78088	7	47	nicotinamide nucleotide metabolic process	57.5781	0.114963
GO:0019362	0.019675	2.79651	2.78088	7	47	pyridine nucleotide metabolic process	57.5781	0.114963
GO:0006778	0.019675	2.79651	2.78088	7	47	porphyrin-containing compound metabolic process	57.5781	0.114963
GO:0098868	0.019675	2.79651	2.78088	7	47	bone growth	57.5781	0.114963
GO:0030857	0.019675	2.79651	2.78088	7	47	negative regulation of epithelial cell differentiation	57.5781	0.114963
GO:0045682	0.019693	2.17359	5.44343	11	92	regulation of epidermis development	23.6141	0.114963
GO:0051966	0.0199416	2.399	4.08257	9	69	regulation of synaptic transmission, glutamatergic	34.3478	0.115854
GO:0035690	0.0199416	2.399	4.08257	9	69	cellular response to drug	34.3478	0.115854
GO:0009651	0.0203405	3.09142	2.18921	6	37	response to salt stress	79.6348	0.116487
GO:0006735	0.0203405	3.09142	2.18921	6	37	NADH regeneration	79.6348	0.116487
GO:0006692	0.0203405	3.09142	2.18921	6	37	prostanoid metabolic process	79.6348	0.116487
GO:0006693	0.0203405	3.09142	2.18921	6	37	prostaglandin metabolic process	79.6348	0.116487
GO:0061718	0.0203405	3.09142	2.18921	6	37	glucose catabolic process to pyruvate	79.6348	0.116487
GO:0061621	0.0203405	3.09142	2.18921	6	37	canonical glycolysis	79.6348	0.116487
GO:0033692	0.0208289	2.25336	4.79259	10	81	cellular polysaccharide biosynthetic process	27.6939	0.119001
GO:0006165	0.0212524	1.8452	9.171	16	155	nucleoside diphosphate phosphorylation	12.1007	0.121133
GO:0008016	0.0214109	1.62677	15.4428	24	261	regulation of heart contraction	6.40155	0.121749
GO:0048857	0.0217255	2.35951	4.14174	9	70	neural nucleus development	33.3735	0.122792
GO:0001894	0.021732	1.60678	16.2711	25	275	tissue homeostasis	6.00661	0.122792
GO:0009653	0.0217472	1.18822	175.906	200	2973	anatomical structure morphogenesis	0.411145	0.122792
GO:0001503	0.0218588	1.45155	27.9272	39	472	ossification	3.18079	0.123061
GO:0043616	0.0218969	2.72811	2.84005	7	48	keratinocyte proliferation	55.204	0.123061
GO:0030154	0.0220535	1.16686	246.138	273	4160	cell differentiation	0.286636	0.123653
GO:0045616	0.0221868	2.50754	3.4909	8	59	regulation of keratinocyte differentiation	41.7581	0.123825
GO:0034381	0.0221868	2.50754	3.4909	8	59	plasma lipoprotein particle clearance	41.7581	0.123825
GO:0043491	0.0223012	1.61982	15.502	24	262	protein kinase B signaling	6.35278	0.124114
GO:0003015	0.0223655	1.54427	19.5845	29	331	heart process	4.80947	0.124114
GO:0051271	0.0223929	1.53193	20.4129	30	345	negative regulation of cellular component movement	4.57971	0.124114
GO:0042490	0.0225106	2.22191	4.85176	10	82	mechanoreceptor differentiation	27.0226	0.124479
GO:0016338	0.0226295	3.47033	1.6567	5	28	calcium-independent cell-cell adhesion via plasma membrane cell-adhesion molecules	115.88	0.124851
GO:0030336	0.0231201	1.55227	18.8153	28	318	negative regulation of cell migration	5.03105	0.127266
GO:0003014	0.0234171	1.86319	8.52016	15	144	renal system process	13.1438	0.128607
GO:0006664	0.0236488	1.9639	7.04096	13	119	glycolipid metabolic process	16.6803	0.12906
GO:1903509	0.0236488	1.9639	7.04096	13	119	liposaccharide metabolic process	16.6803	0.12906
GO:0046939	0.0236602	1.81878	9.28934	16	157	nucleotide phosphorylation	11.7944	0.12906
GO:0043086	0.0237847	1.34364	45.5	59	769	negative regulation of catalytic activity	1.81282	0.129372
GO:0034220	0.0238246	1.26788	75.2022	92	1271	ion transmembrane transport	1.03479	0.129372
GO:0019220	0.024189	1.23063	102.893	122	1739	regulation of phosphate metabolic process	0.73302	0.131055
GO:0055021	0.0242884	2.19132	4.91092	10	83	regulation of cardiac muscle tissue growth	26.3754	0.131299
GO:0048731	0.0244251	1.15582	289.508	317	4893	system development	0.240582	0.131742
GO:0003018	0.0248197	1.73883	10.8869	18	184	vascular process in circulatory system	9.66033	0.133572
GO:0070848	0.0254738	1.3312	47.4525	61	802	response to growth factor	1.7232	0.136787
GO:0060038	0.0256314	2.28429	4.26008	9	72	cardiac muscle cell proliferation	31.5451	0.137265
GO:0060411	0.0257782	2.00084	6.39012	12	108	cardiac septum morphogenesis	18.6934	0.137265
GO:0060674	0.0258474	2.90366	2.30754	6	39	placenta blood vessel development	71.6765	0.137265
GO:1901031	0.0258474	2.90366	2.30754	6	39	regulation of response to reactive oxygen species	71.6765	0.137265
GO:0009435	0.0258474	2.90366	2.30754	6	39	NAD biosynthetic process	71.6765	0.137265
GO:0009164	0.026052	3.32551	1.71586	5	29	nucleoside catabolic process	108.026	0.137738
GO:0000303	0.026052	3.32551	1.71586	5	29	response to superoxide	108.026	0.137738
GO:1904035	0.0261585	2.07073	5.6801	11	96	regulation of epithelial cell apoptotic process	21.6873	0.137738
GO:0051899	0.0261651	2.16156	4.97009	10	84	membrane depolarization	25.7511	0.137738
GO:0009308	0.0262237	1.75815	10.1769	17	172	amine metabolic process	10.4411	0.137746
GO:0032502	0.0268067	1.14528	370.686	399	6265	developmental process	0.184708	0.140116
GO:0009712	0.0268492	2.60087	2.95839	7	50	catechol-containing compound metabolic process	50.876	0.140116
GO:0006584	0.0268492	2.60087	2.95839	7	50	catecholamine metabolic process	50.876	0.140116
GO:0009719	0.027241	1.22132	106.147	125	1794	response to endogenous stimulus	0.7057	0.141714
GO:0070887	0.0273142	1.17077	199.04	223	3364	cellular response to chemical stimulus	0.358053	0.141714
GO:0051174	0.0273317	1.22381	103.366	122	1747	regulation of phosphorus metabolic process	0.726322	0.141714
GO:0090287	0.0276186	1.53842	18.2828	27	309	regulation of cellular response to growth factor stimulus	5.13809	0.142894
GO:0071300	0.02776	2.24844	4.31925	9	73	cellular response to retinoic acid	30.6868	0.143318
GO:0061061	0.0278502	1.33656	44.1391	57	746	muscle structure development	1.86102	0.143476
GO:0098742	0.0279796	1.59835	15.0286	23	254	cell-cell adhesion via plasma-membrane adhesion molecules	6.47762	0.143835
GO:0046513	0.0281434	2.13259	5.02926	10	85	ceramide biosynthetic process	25.1488	0.14437
GO:1901566	0.0286762	1.21676	108.218	127	1829	organonitrogen compound biosynthetic process	0.689813	0.14658
GO:0031644	0.028848	1.85292	7.98765	14	135	regulation of nervous system process	13.9578	0.14658
GO:1904019	0.028848	1.85292	7.98765	14	135	epithelial cell apoptotic process	13.9578	0.14658
GO:0009069	0.028939	2.81806	2.36671	6	40	serine family amino acid metabolic process	68.1375	0.14658
GO:0006084	0.028939	2.81806	2.36671	6	40	acetyl-CoA metabolic process	68.1375	0.14658
GO:0061620	0.028939	2.81806	2.36671	6	40	glycolytic process through glucose-6-phosphate	68.1375	0.14658
GO:0046031	0.0290781	1.80665	8.75683	15	148	ADP metabolic process	12.4429	0.146976
GO:0042491	0.0295898	2.54158	3.01756	7	51	inner ear auditory receptor cell differentiation	48.9004	0.149249
GO:0000305	0.0297881	3.19227	1.77503	5	30	response to oxygen radical	100.944	0.149935
GO:0030500	0.0299116	2.02285	5.79844	11	98	regulation of bone mineralization	20.8111	0.150243
GO:0050673	0.0304775	1.41947	27.7497	38	469	epithelial cell proliferation	3.13901	0.152768
GO:0042325	0.0310927	1.23132	89.935	107	1520	regulation of phosphorylation	0.841495	0.155528
GO:0022610	0.0315832	1.22713	92.775	110	1568	biological adhesion	0.812934	0.157655
GO:0009165	0.0318201	1.52952	17.6912	26	299	nucleotide biosynthetic process	5.28428	0.158509
GO:0046683	0.0321196	1.74381	9.64434	16	163	response to organophosphorus	10.9421	0.159671
GO:0060122	0.0322641	2.73736	2.42588	6	41	inner ear receptor cell stereocilium organization	64.8543	0.15973
GO:0042168	0.0322641	2.73736	2.42588	6	41	heme metabolic process	64.8543	0.15973
GO:0009636	0.032405	1.59005	14.4369	22	244	response to toxic substance	6.71426	0.159819
GO:0031102	0.0324146	2.07691	5.14759	10	87	neuron projection regeneration	24.0058	0.159819
GO:0042634	0.0338448	3.06927	1.8342	5	31	regulation of hair cycle	94.5369	0.165343
GO:0035886	0.0338448	3.06927	1.8342	5	31	vascular associated smooth muscle cell differentiation	94.5369	0.165343
GO:0070168	0.0338448	3.06927	1.8342	5	31	negative regulation of biomineral tissue development	94.5369	0.165343
GO:0110150	0.0338448	3.06927	1.8342	5	31	negative regulation of biomineralization	94.5369	0.165343
GO:0006096	0.0339465	1.80771	8.16515	14	138	glycolytic process	13.3575	0.165343
GO:0006757	0.0339465	1.80771	8.16515	14	138	ATP generation from ADP	13.3575	0.165343
GO:0097006	0.0340346	1.97712	5.91678	11	100	regulation of plasma lipoprotein particle levels	19.987	0.165438
GO:0035088	0.034287	2.28286	3.78674	8	64	establishment or maintenance of apical/basal cell polarity	35.4883	0.165663
GO:0019229	0.034287	2.28286	3.78674	8	64	regulation of vasoconstriction	35.4883	0.165663
GO:0061245	0.034287	2.28286	3.78674	8	64	establishment or maintenance of bipolar cell polarity	35.4883	0.165663
GO:0043408	0.0348012	1.31961	43.8433	56	741	regulation of MAPK cascade	1.85313	0.167002
GO:0007155	0.034998	1.2219	92.2425	109	1559	cell adhesion	0.814872	0.167002
GO:2000146	0.0350473	1.48933	19.5254	28	330	negative regulation of cell motility	4.67181	0.167002
GO:0035383	0.035049	1.90112	6.68596	12	113	thioester metabolic process	17.0757	0.167002
GO:0006637	0.035049	1.90112	6.68596	12	113	acyl-CoA metabolic process	17.0757	0.167002
GO:0070167	0.035049	1.90112	6.68596	12	113	regulation of biomineral tissue development	17.0757	0.167002
GO:0110149	0.035049	1.90112	6.68596	12	113	regulation of biomineralization	17.0757	0.167002
GO:1901293	0.0353419	1.51257	17.8687	26	302	nucleoside phosphate biosynthetic process	5.17982	0.167746
GO:0072091	0.0356226	2.43074	3.13589	7	53	regulation of stem cell proliferation	45.2795	0.167746
GO:0003044	0.0356226	2.43074	3.13589	7	53	regulation of systemic arterial blood pressure mediated by a chemical signal	45.2795	0.167746
GO:0098815	0.0356226	2.43074	3.13589	7	53	modulation of excitatory postsynaptic potential	45.2795	0.167746
GO:0048662	0.0356226	2.43074	3.13589	7	53	negative regulation of smooth muscle cell proliferation	45.2795	0.167746
GO:0021762	0.0356226	2.43074	3.13589	7	53	substantia nigra development	45.2795	0.167746
GO:0061615	0.0358278	2.66114	2.48505	6	42	glycolytic process through fructose-6-phosphate	61.8027	0.168384
GO:0042303	0.0362398	1.95501	5.97594	11	101	molting cycle	19.5932	0.16933
GO:0042633	0.0362398	1.95501	5.97594	11	101	hair cycle	19.5932	0.16933
GO:0019935	0.0362398	1.95501	5.97594	11	101	cyclic-nucleotide-mediated signaling	19.5932	0.16933
GO:1901361	0.0364529	1.33302	39.5241	51	668	organic cyclic compound catabolic process	2.07669	0.169996
GO:0001932	0.0368677	1.23739	77.6281	93	1312	regulation of protein phosphorylation	0.981681	0.170955
GO:0000271	0.0371213	2.02405	5.26593	10	89	polysaccharide biosynthetic process	22.939	0.170955
GO:1904705	0.0371549	2.24266	3.8459	8	65	regulation of vascular associated smooth muscle cell proliferation	34.4047	0.170955
GO:0060389	0.0371549	2.24266	3.8459	8	65	pathway-restricted SMAD protein phosphorylation	34.4047	0.170955
GO:0060412	0.0371549	2.24266	3.8459	8	65	ventricular septum morphogenesis	34.4047	0.170955
GO:1990874	0.0371549	2.24266	3.8459	8	65	vascular associated smooth muscle cell proliferation	34.4047	0.170955
GO:0007588	0.0371549	2.24266	3.8459	8	65	excretion	34.4047	0.170955
GO:0050953	0.0374485	1.64837	11.4194	18	193	sensory perception of light stimulus	8.78037	0.171978
GO:0010035	0.0378685	1.35003	35.2048	46	595	response to inorganic substance	2.36091	0.173576
GO:0048871	0.0381475	1.36894	31.7139	42	536	multicellular organismal homeostasis	2.65628	0.174307
GO:0060713	0.0382278	2.95539	1.89337	5	32	labyrinthine layer morphogenesis	88.7207	0.174307
GO:0043062	0.0383172	1.41994	24.7913	34	419	extracellular structure organization	3.51889	0.174307
GO:0030198	0.0383172	1.41994	24.7913	34	419	extracellular matrix organization	3.51889	0.174307
GO:0060119	0.0389227	2.37886	3.19506	7	54	inner ear receptor cell development	43.618	0.176396
GO:0019748	0.0389227	2.37886	3.19506	7	54	secondary metabolic process	43.618	0.176396
GO:0046717	0.0396346	2.58903	2.54421	6	43	acid secretion	58.9616	0.178989
GO:0045665	0.0396434	1.99861	5.3251	10	90	negative regulation of neuron differentiation	22.4321	0.178989
GO:0006956	0.0401797	2.20384	3.90507	8	66	complement activation	33.3701	0.181072
GO:0060113	0.0402789	2.08479	4.61508	9	78	inner ear receptor cell differentiation	26.8787	0.18118
GO:0007275	0.0403727	1.1344	319.033	344	5392	multicellular organism development	0.214988	0.181264
GO:0045229	0.0405607	1.4124	24.9096	34	421	external encapsulating structure organization	3.48554	0.181278
GO:0051241	0.0405993	1.25714	62.3628	76	1054	negative regulation of multicellular organismal process	1.24305	0.181278
GO:0050793	0.0406014	1.16915	157.031	177	2654	regulation of developmental process	0.45659	0.181278
GO:0003279	0.0413169	1.71548	9.171	15	155	cardiac septum development	11.3444	0.184131
GO:0071363	0.0420428	1.2989	45.2633	57	765	cellular response to growth factor stimulus	1.76973	0.186958
GO:0060420	0.0422809	1.9738	5.38427	10	91	regulation of heart growth	21.9418	0.186958
GO:0014855	0.0422809	1.9738	5.38427	10	91	striated muscle cell proliferation	21.9418	0.186958
GO:0051702	0.0422809	1.9738	5.38427	10	91	biological process involved in interaction with symbiont	21.9418	0.186958
GO:0071470	0.0424165	2.32913	3.25423	7	55	cellular response to osmotic stress	42.0463	0.186958
GO:0001706	0.0424165	2.32913	3.25423	7	55	endoderm formation	42.0463	0.186958
GO:0040007	0.0425102	1.2483	65.262	79	1103	growth	1.17986	0.186989
GO:1901137	0.0425786	1.31395	40.8257	52	690	carbohydrate derivative biosynthetic process	1.98454	0.186989
GO:0010640	0.0429416	2.84964	1.95254	5	33	regulation of platelet-derived growth factor receptor signaling pathway	83.4252	0.188241
GO:0060193	0.0431764	2.05486	4.67425	9	79	positive regulation of lipase activity	26.2025	0.188243
GO:0042440	0.0431764	2.05486	4.67425	9	79	pigment metabolic process	26.2025	0.188243
GO:0006695	0.0431764	2.05486	4.67425	9	79	cholesterol biosynthetic process	26.2025	0.188243
GO:0048661	0.0434523	1.89155	6.15345	11	104	positive regulation of smooth muscle cell proliferation	18.4791	0.189104
GO:0001933	0.0435857	1.41046	24.1996	33	409	negative regulation of protein phosphorylation	3.58445	0.189343
GO:0046467	0.044578	1.66373	10.0585	16	170	membrane lipid biosynthetic process	10.0595	0.193305
GO:0051240	0.0450318	1.21431	85.7932	101	1450	positive regulation of multicellular organismal process	0.872851	0.194922
GO:0033865	0.0460412	1.72356	8.52016	14	144	nucleoside bisphosphate metabolic process	12.2676	0.198224
GO:0033875	0.0460412	1.72356	8.52016	14	144	ribonucleoside bisphosphate metabolic process	12.2676	0.198224
GO:0034032	0.0460412	1.72356	8.52016	14	144	purine nucleoside bisphosphate metabolic process	12.2676	0.198224
GO:0042310	0.0462105	2.02578	4.73342	9	80	vasoconstriction	25.5516	0.198245
GO:0031103	0.0462105	2.02578	4.73342	9	80	axon regeneration	25.5516	0.198245
GO:0042326	0.0474242	1.3779	26.9805	36	456	negative regulation of phosphorylation	3.14578	0.20229
GO:0001655	0.0475759	1.4145	22.6612	31	383	urogenital system development	3.83989	0.20229
GO:0009187	0.0479924	2.45592	2.66255	6	45	cyclic nucleotide metabolic process	53.837	0.20229
GO:0006007	0.0479924	2.45592	2.66255	6	45	glucose catabolic process	53.837	0.20229
GO:0003254	0.0479924	2.45592	2.66255	6	45	regulation of membrane depolarization	53.837	0.20229
GO:0048009	0.0479924	2.45592	2.66255	6	45	insulin-like growth factor receptor signaling pathway	53.837	0.20229
GO:0070570	0.0479924	2.45592	2.66255	6	45	regulation of neuron projection regeneration	53.837	0.20229
GO:0014014	0.0479924	2.45592	2.66255	6	45	negative regulation of gliogenesis	53.837	0.20229
GO:0051180	0.0479924	2.45592	2.66255	6	45	vitamin transport	53.837	0.20229
GO:0055023	0.0479924	2.45592	2.66255	6	45	positive regulation of cardiac muscle tissue growth	53.837	0.20229
GO:0003281	0.0487749	1.85147	6.27178	11	106	ventricular septum development	17.7884	0.205229
GO:0033993	0.0490371	1.25351	57.5111	70	972	response to lipid	1.34623	0.205973
GO:1902653	0.0493832	1.9975	4.79259	9	81	secondary alcohol biosynthetic process	24.9246	0.207066
GO:0009179	0.0497668	1.66736	9.40767	15	159	purine ribonucleoside diphosphate metabolic process	10.7808	0.207832
GO:0009135	0.0497668	1.66736	9.40767	15	159	purine nucleoside diphosphate metabolic process	10.7808	0.207832
GO:0060416	0.0499969	2.23566	3.37256	7	57	response to growth hormone	39.1474	0.207832
GO:1905517	0.0499969	2.23566	3.37256	7	57	macrophage migration	39.1474	0.207832
GO:0007595	0.0499969	2.23566	3.37256	7	57	lactation	39.1474	0.207832
GO:0046530	0.0502212	2.09502	4.08257	8	69	photoreceptor cell differentiation	30.5314	0.208061
GO:0001822	0.0502246	1.44428	19.3479	27	327	kidney development	4.588	0.208061
GO:0060191	0.0515949	1.83206	6.33095	11	107	regulation of lipase activity	17.4574	0.213006
GO:0072080	0.0515949	1.83206	6.33095	11	107	nephron tubule development	17.4574	0.213006
GO:0001508	0.0516858	1.77704	7.10013	12	120	action potential	15.1417	0.213016
GO:0060428	0.0525489	2.39436	2.72172	6	46	lung epithelium development	51.5217	0.21531
GO:0043094	0.0525489	2.39436	2.72172	6	46	cellular metabolic compound salvage	51.5217	0.21531
GO:0043403	0.0525489	2.39436	2.72172	6	46	skeletal muscle tissue regeneration	51.5217	0.21531
GO:0062012	0.0525995	1.36451	27.2172	36	460	regulation of small molecule metabolic process	3.0913	0.21531
GO:0051897	0.053071	1.62116	10.2952	16	174	positive regulation of protein kinase B signaling	9.60233	0.216871
GO:0010559	0.0533727	2.6593	2.07087	5	35	regulation of glycoprotein biosynthetic process	74.1633	0.217275
GO:0060042	0.053898	2.06108	4.14174	8	70	retina morphogenesis in camera-type eye	29.6653	0.217275
GO:0071616	0.053898	2.06108	4.14174	8	70	acyl-CoA biosynthetic process	29.6653	0.217275
GO:0035384	0.053898	2.06108	4.14174	8	70	thioester biosynthetic process	29.6653	0.217275
GO:0003007	0.0540541	1.44321	18.6378	26	315	heart morphogenesis	4.7611	0.217275
GO:0060393	0.0540882	2.19167	3.43173	7	58	regulation of pathway-restricted SMAD protein phosphorylation	37.8092	0.217275
GO:0046622	0.0540882	2.19167	3.43173	7	58	positive regulation of organ growth	37.8092	0.217275
GO:0031424	0.0540882	2.19167	3.43173	7	58	keratinization	37.8092	0.217275
GO:0048286	0.0540882	2.19167	3.43173	7	58	lung alveolus development	37.8092	0.217275
GO:0007507	0.0541181	1.29658	39.7016	50	671	heart development	2.01781	0.217275
GO:0040013	0.054161	1.40409	22.0696	30	373	negative regulation of locomotion	3.91795	0.217275
GO:0009185	0.0544147	1.64429	9.52601	15	161	ribonucleoside diphosphate metabolic process	10.5146	0.21793
GO:0010632	0.0552224	1.46327	16.9811	24	287	regulation of epithelial cell migration	5.29422	0.220798
GO:0006869	0.0555736	1.35143	28.223	37	477	lipid transport	2.95474	0.221834
GO:0010631	0.0557081	1.39991	22.1287	30	374	epithelial cell migration	3.89702	0.222004
GO:0001890	0.0559962	1.5825	11.1827	17	189	placenta development	8.64729	0.222783
GO:0030301	0.0561513	1.94325	4.91092	9	83	cholesterol transport	23.7378	0.223033
GO:0006140	0.0565947	1.70444	7.98765	13	135	regulation of nucleotide metabolic process	12.9608	0.224424
GO:0048708	0.0572591	1.8584	5.6801	10	96	astrocyte differentiation	19.7157	0.226686
GO:0048483	0.0573597	2.3358	2.78088	6	47	autonomic nervous system development	49.3526	0.226712
GO:0060047	0.057468	1.43309	18.7562	26	317	heart contraction	4.70121	0.226768
GO:0071364	0.0577427	2.02823	4.20091	8	71	cellular response to epidermal growth factor stimulus	28.8355	0.22748
GO:0007601	0.0582749	1.57324	11.2419	17	190	visual perception	8.55651	0.229202
GO:0090132	0.0588978	1.39162	22.2471	30	376	epithelium migration	3.85568	0.231274
GO:0042462	0.0590922	2.57334	2.13004	5	36	eye photoreceptor cell development	70.1003	0.231285
GO:1905207	0.0590922	2.57334	2.13004	5	36	regulation of cardiocyte differentiation	70.1003	0.231285
GO:0009132	0.0601375	1.59062	10.4727	16	177	nucleoside diphosphate metabolic process	9.27958	0.234994
GO:0019217	0.0606234	1.83691	5.73927	10	97	regulation of fatty acid metabolic process	19.3113	0.236082
GO:0061326	0.0607055	1.77617	6.50845	11	110	renal tubule development	16.5182	0.236082
GO:0051896	0.0607095	1.50414	13.7861	20	233	regulation of protein kinase B signaling	6.69381	0.236082
GO:0010876	0.0614616	1.31823	32.0098	41	541	lipid localization	2.54533	0.23848
GO:0071496	0.0616229	1.39316	21.4779	29	363	cellular response to external stimulus	3.99889	0.23848
GO:0007178	0.0616229	1.39316	21.4779	29	363	transmembrane receptor protein serine/threonine kinase signaling pathway	3.99889	0.23848
GO:0072001	0.0619189	1.41065	19.762	27	334	renal system development	4.3977	0.239241
GO:0046839	0.0624259	2.28003	2.84005	6	48	phospholipid dephosphorylation	47.3177	0.240562
GO:0044092	0.0624868	1.21689	67.5696	80	1142	negative regulation of molecular function	1.11458	0.240562
GO:0045936	0.0625602	1.30314	34.7315	44	587	negative regulation of phosphate metabolic process	2.32023	0.240562
GO:0035315	0.0628815	2.10867	3.55007	7	60	hair cell differentiation	35.3306	0.241413
GO:0035637	0.0630228	1.55505	11.3602	17	192	multicellular organismal signaling	8.37918	0.241571
GO:0001649	0.0634193	1.45127	16.3895	23	277	osteoblast differentiation	5.44657	0.242216
GO:2001057	0.0634925	1.89185	5.02926	9	85	reactive nitrogen species metabolic process	22.6339	0.242216
GO:0009119	0.0634925	1.89185	5.02926	9	85	ribonucleoside metabolic process	22.6339	0.242216
GO:0045444	0.0646417	1.47555	14.7328	21	249	fat cell differentiation	6.15426	0.24621
GO:0009566	0.0651425	1.66319	8.16515	13	138	fertilization	12.4034	0.246965
GO:0003016	0.0651472	2.49275	2.18921	5	37	respiratory system process	66.3623	0.246965
GO:0070873	0.0651472	2.49275	2.18921	5	37	regulation of glycogen metabolic process	66.3623	0.246965
GO:0010563	0.0653173	1.29818	34.8498	44	589	negative regulation of phosphorus metabolic process	2.3045	0.247221
GO:1901701	0.0657731	1.20241	75.2022	88	1271	cellular response to oxygen-containing compound	0.989798	0.248556
GO:0006835	0.0664164	1.69781	7.39597	12	125	dicarboxylic acid transport	13.9546	0.249813
GO:0006939	0.0664164	1.69781	7.39597	12	125	smooth muscle contraction	13.9546	0.249813
GO:0021549	0.0664164	1.69781	7.39597	12	125	cerebellum development	13.9546	0.249813
GO:0006970	0.0673317	1.74076	6.62679	11	112	response to osmotic stress	15.9335	0.252861
GO:0090130	0.069249	1.36732	22.6021	30	382	tissue migration	3.73551	0.259657
GO:0060078	0.0693718	1.61095	9.05267	14	153	regulation of postsynaptic membrane potential	10.8668	0.259713
GO:0007623	0.0696875	1.476	14.0228	20	237	circadian rhythm	6.46976	0.260491
GO:0051216	0.0701715	1.49124	13.1944	19	223	cartilage development	6.94223	0.261894
GO:0007565	0.070497	1.50859	12.3661	18	209	female pregnancy	7.48747	0.262685
GO:0048568	0.0706014	1.32582	27.9272	36	472	embryonic organ development	2.93612	0.262685
GO:0046620	0.0708132	1.72357	6.68596	11	113	regulation of organ growth	15.6528	0.263067
GO:0035050	0.0714154	1.84308	5.14759	9	87	embryonic heart tube development	21.6052	0.263719
GO:0001570	0.0714739	1.77531	5.91678	10	100	vasculogenesis	18.17	0.263719
GO:0097106	0.0715356	2.41704	2.24837	5	38	postsynaptic density organization	62.9155	0.263719
GO:1901658	0.0715356	2.41704	2.24837	5	38	glycosyl compound catabolic process	62.9155	0.263719
GO:0006739	0.0715356	2.41704	2.24837	5	38	NADP metabolic process	62.9155	0.263719
GO:0001525	0.0719429	1.27962	36.9207	46	624	angiogenesis	2.14656	0.264816
GO:0046686	0.0724952	2.03171	3.6684	7	62	response to cadmium ion	33.0879	0.265632
GO:0019226	0.0724952	2.03171	3.6684	7	62	transmission of nerve impulse	33.0879	0.265632
GO:0007157	0.0724952	2.03171	3.6684	7	62	heterophilic cell-cell adhesion via plasma membrane cell adhesion molecules	33.0879	0.265632
GO:0001704	0.0730059	1.66805	7.5143	12	127	formation of primary germ layer	13.5185	0.26679
GO:0006164	0.0730626	1.50063	12.4252	18	210	purine nucleotide biosynthetic process	7.41633	0.26679
GO:0007369	0.0732951	1.51987	11.5969	17	196	gastrulation	8.04066	0.26679
GO:0060669	0.0733247	2.17609	2.95839	6	50	embryonic placenta morphogenesis	43.608	0.26679
GO:0014070	0.0733646	1.21118	63.5462	75	1074	response to organic cyclic compound	1.18143	0.26679
GO:0048709	0.0744077	1.70672	6.74512	11	114	oligodendrocyte differentiation	15.3793	0.269653
GO:0051336	0.0747843	1.18722	80.409	93	1359	regulation of hydrolase activity	0.914953	0.269653
GO:0071479	0.0748229	1.90661	4.43758	8	75	cellular response to ionizing radiation	25.8418	0.269653
GO:0072089	0.0748229	1.90661	4.43758	8	75	stem cell proliferation	25.8418	0.269653
GO:0070849	0.0748229	1.90661	4.43758	8	75	response to epidermal growth factor	25.8418	0.269653
GO:0007193	0.0748229	1.90661	4.43758	8	75	adenylate cyclase-inhibiting G protein-coupled receptor signaling pathway	25.8418	0.269653
GO:0072522	0.075169	1.47656	13.3127	19	225	purine-containing compound biosynthetic process	6.81936	0.270496
GO:0003151	0.0753458	1.75568	5.97594	10	101	outflow tract morphogenesis	17.812	0.270728
GO:0048856	0.0771861	1.1073	345.244	366	5835	anatomical structure development	0.195323	0.276928
GO:0002763	0.0776105	1.99529	3.72757	7	63	positive regulation of myeloid leukocyte differentiation	32.0459	0.278037
GO:1901657	0.0778081	1.61117	8.40182	13	142	glycosyl compound metabolic process	11.7144	0.278331
GO:0045776	0.0782545	2.34579	2.30754	5	39	negative regulation of blood pressure	59.7304	0.2791
GO:0042311	0.0782545	2.34579	2.30754	5	39	vasodilation	59.7304	0.2791
GO:0046390	0.0783796	1.48495	12.5436	18	212	ribose phosphate biosynthetic process	7.27706	0.279133
GO:0046460	0.079156	2.12758	3.01756	6	51	neutral lipid biosynthetic process	41.9146	0.280655
GO:0046463	0.079156	2.12758	3.01756	6	51	acylglycerol biosynthetic process	41.9146	0.280655
GO:0006195	0.079156	2.12758	3.01756	6	51	purine nucleotide catabolic process	41.9146	0.280655
GO:0015909	0.0795215	1.87844	4.49675	8	76	long-chain fatty acid transport	25.1662	0.281172
GO:0061448	0.0796674	1.39824	17.6912	24	299	connective tissue development	4.8778	0.281172
GO:0045216	0.0798896	1.42075	15.9753	22	270	cell-cell junction organization	5.4834	0.281172
GO:0016126	0.0799252	1.79675	5.26593	9	89	sterol biosynthetic process	20.6451	0.281172
GO:0007492	0.0799252	1.79675	5.26593	9	89	endoderm development	20.6451	0.281172
GO:0072009	0.0800017	1.63931	7.63264	12	129	nephron epithelium development	13.1026	0.281172
GO:0048878	0.0815619	1.19167	71.4155	83	1207	chemical homeostasis	1.03519	0.286164
GO:0040008	0.0816594	1.24455	43.6658	53	738	regulation of growth	1.76815	0.286164
GO:0001837	0.0818748	1.56545	9.28934	14	157	epithelial to mesenchymal transition	10.3201	0.286502
GO:0003231	0.082125	1.53782	10.1177	15	171	cardiac ventricle development	9.32082	0.286546
GO:0003206	0.082125	1.53782	10.1177	15	171	cardiac chamber morphogenesis	9.32082	0.286546
GO:0048146	0.0829309	1.96015	3.78674	7	64	positive regulation of fibroblast proliferation	31.0522	0.288523
GO:0010518	0.0829309	1.96015	3.78674	7	64	positive regulation of phospholipase activity	31.0522	0.288523
GO:0003143	0.0843917	1.85109	4.55592	8	77	embryonic heart tube morphogenesis	24.5168	0.292372
GO:0098773	0.084401	1.77445	5.3251	9	90	skin epidermis development	20.1889	0.292372
GO:0098869	0.084401	1.77445	5.3251	9	90	cellular oxidant detoxification	20.1889	0.292372
GO:0060421	0.0852399	2.08119	3.07672	6	52	positive regulation of heart growth	40.318	0.293796
GO:0030449	0.0852399	2.08119	3.07672	6	52	regulation of complement activation	40.318	0.293796
GO:0034331	0.0852399	2.08119	3.07672	6	52	cell junction maintenance	40.318	0.293796
GO:0043090	0.0852996	2.27861	2.36671	5	40	amino acid import	56.7812	0.293796
GO:0071704	0.0857198	1.11018	619.901	639	10477	organic substance metabolic process	0.105775	0.294822
GO:0009116	0.0858744	1.65807	6.92263	11	117	nucleoside metabolic process	14.6008	0.294933
GO:0007599	0.0868802	1.33974	22.2471	29	376	hemostasis	3.72715	0.297963
GO:0031952	0.0884556	1.92622	3.8459	7	65	regulation of protein autophosphorylation	30.1041	0.302935
GO:0030901	0.0890239	1.75269	5.38427	9	91	midbrain development	19.7476	0.304018
GO:0010633	0.0890239	1.75269	5.38427	9	91	negative regulation of epithelial cell migration	19.7476	0.304018
GO:0035924	0.0894332	1.82452	4.61508	8	78	cellular response to vascular endothelial growth factor stimulus	23.8922	0.304984
GO:0090092	0.0902578	1.42272	14.4961	20	245	regulation of transmembrane receptor protein serine/threonine kinase signaling pathway	6.05414	0.307361
GO:1900542	0.0912637	1.598	7.81014	12	132	regulation of purine nucleotide metabolic process	12.5138	0.309911
GO:0022037	0.0912637	1.598	7.81014	12	132	metencephalon development	12.5138	0.309911
GO:0014003	0.091574	2.03676	3.13589	6	53	oligodendrocyte development	38.811	0.310527
GO:1903018	0.0926656	2.21516	2.42588	5	41	regulation of glycoprotein metabolic process	54.0452	0.312471
GO:0048679	0.0926656	2.21516	2.42588	5	41	regulation of axon regeneration	54.0452	0.312471
GO:1900371	0.0926656	2.21516	2.42588	5	41	regulation of purine nucleotide biosynthetic process	54.0452	0.312471
GO:0099084	0.0926656	2.21516	2.42588	5	41	postsynaptic specialization organization	54.0452	0.312471
GO:0008360	0.0938333	1.46196	12.0111	17	203	regulation of cell shape	7.49569	0.315967
GO:0001667	0.0941982	1.28219	29.5839	37	500	ameboidal-type cell migration	2.68916	0.316753
GO:0044706	0.0945099	1.42733	13.7269	19	232	multi-multicellular organism process	6.41405	0.317358
GO:0046128	0.0946452	1.79869	4.67425	8	79	purine ribonucleoside metabolic process	23.2911	0.317371
GO:0016310	0.0948473	1.13522	133.837	148	2262	phosphorylation	0.525571	0.317607
GO:0030183	0.0952233	1.58468	7.86931	12	133	B cell differentiation	12.3263	0.318424
GO:0071559	0.0953705	1.38661	16.3303	22	276	response to transforming growth factor beta	5.24758	0.318474
GO:0016485	0.0958393	1.4398	12.8986	18	218	protein processing	6.882	0.319597
GO:0009152	0.0980679	1.47044	11.2419	16	190	purine ribonucleotide biosynthetic process	8.05319	0.325782
GO:0038084	0.0981554	1.99419	3.19506	6	54	vascular endothelial growth factor signaling pathway	37.3868	0.325782
GO:0031638	0.0981554	1.99419	3.19506	6	54	zymogen activation	37.3868	0.325782
GO:0060349	0.0983696	1.6121	7.10013	11	120	bone morphogenesis	13.8799	0.325782
GO:0007613	0.0983696	1.6121	7.10013	11	120	memory	13.8799	0.325782
GO:0014074	0.0988806	1.48954	10.4135	15	176	response to purine-containing compound	8.79875	0.326663
GO:0050890	0.0989066	1.3689	17.277	23	292	cognition	4.90137	0.326663
GO:0071772	0.0994135	1.51204	9.58518	14	162	response to BMP	9.69288	0.326993
GO:0071773	0.0994135	1.51204	9.58518	14	162	cellular response to BMP stimulus	9.69288	0.326993
GO:0051147	0.0994135	1.51204	9.58518	14	162	regulation of muscle cell differentiation	9.69288	0.326993
GO:0042417	0.100346	2.15514	2.48505	5	42	dopamine metabolic process	51.5023	0.327825
GO:0046456	0.100346	2.15514	2.48505	5	42	icosanoid biosynthetic process	51.5023	0.327825
GO:1903725	0.100346	2.15514	2.48505	5	42	regulation of phospholipid metabolic process	51.5023	0.327825
GO:0010543	0.100346	2.15514	2.48505	5	42	regulation of platelet activation	51.5023	0.327825
GO:0030808	0.100346	2.15514	2.48505	5	42	regulation of nucleotide biosynthetic process	51.5023	0.327825
GO:0019439	0.101825	1.23937	37.9857	46	642	aromatic compound catabolic process	2.02788	0.33195
GO:0048705	0.101884	1.39748	14.7328	20	249	skeletal system morphogenesis	5.8612	0.33195
GO:0034614	0.102468	1.48024	10.4727	15	177	cellular response to reactive oxygen species	8.69961	0.333401
GO:0009914	0.103021	1.32665	20.8862	27	353	hormone transport	3.93704	0.33475
GO:0030509	0.103541	1.52749	8.81599	13	149	BMP signaling pathway	10.6396	0.335984
GO:0060485	0.104447	1.3586	17.3953	23	294	mesenchyme development	4.83491	0.338472
GO:0038066	0.104981	1.95336	3.25423	6	55	p38MAPK cascade	36.0397	0.339287
GO:1901028	0.104981	1.95336	3.25423	6	55	regulation of mitochondrial outer membrane permeabilization involved in apoptotic signaling pathway	36.0397	0.339287
GO:0042278	0.105577	1.74917	4.79259	8	81	purine nucleoside metabolic process	22.1552	0.340746
GO:0034109	0.106048	1.62948	6.39012	10	108	homotypic cell-cell adhesion	15.5778	0.340746
GO:0001764	0.106134	1.47106	10.5319	15	178	neuron migration	8.60213	0.340746
GO:0001836	0.10624	1.83111	4.02341	7	68	release of cytochrome c from mitochondria	27.5065	0.340746
GO:0090398	0.10624	1.83111	4.02341	7	68	cellular senescence	27.5065	0.340746
GO:0048589	0.10628	1.20977	47.3342	56	800	developmental growth	1.58987	0.340746
GO:0021782	0.107718	1.54602	8.04681	12	136	glial cell development	11.7885	0.344585
GO:0007596	0.108122	1.31143	21.8921	28	370	blood coagulation	3.71629	0.344585
GO:0007568	0.108145	1.32596	20.117	26	340	aging	4.08668	0.344585
GO:1904707	0.108335	2.09828	2.54421	5	43	positive regulation of vascular associated smooth muscle cell proliferation	49.1347	0.344585
GO:0042181	0.108335	2.09828	2.54421	5	43	ketone biosynthetic process	49.1347	0.344585
GO:0051294	0.108335	2.09828	2.54421	5	43	establishment of spindle orientation	49.1347	0.344585
GO:0042692	0.110789	1.27339	27.3355	34	462	muscle cell differentiation	2.89434	0.350299
GO:0090277	0.110946	1.61291	6.44928	10	109	positive regulation of peptide hormone secretion	15.2933	0.350299
GO:0072006	0.110962	1.48168	9.76268	14	165	nephron development	9.34362	0.350299
GO:0006959	0.110962	1.48168	9.76268	14	165	humoral immune response	9.34362	0.350299
GO:0033866	0.111294	1.72541	4.85176	8	82	nucleoside bisphosphate biosynthetic process	21.6181	0.350299
GO:0021675	0.111294	1.72541	4.85176	8	82	nerve development	21.6181	0.350299
GO:0034030	0.111294	1.72541	4.85176	8	82	ribonucleoside bisphosphate biosynthetic process	21.6181	0.350299
GO:0034033	0.111294	1.72541	4.85176	8	82	purine nucleoside bisphosphate biosynthetic process	21.6181	0.350299
GO:0071560	0.11204	1.36585	15.7978	21	267	cellular response to transforming growth factor beta stimulus	5.35244	0.351124
GO:0031018	0.112045	1.91416	3.31339	6	56	endocrine pancreas development	34.764	0.351124
GO:0009311	0.112045	1.91416	3.31339	6	56	oligosaccharide metabolic process	34.764	0.351124
GO:0003205	0.112138	1.40419	13.1944	18	223	cardiac chamber development	6.57685	0.351124
GO:0002920	0.112565	1.80145	4.08257	7	69	regulation of humoral immune response	26.715	0.351547
GO:1903779	0.112565	1.80145	4.08257	7	69	regulation of cardiac conduction	26.715	0.351547
GO:0007186	0.112718	1.20555	46.6242	55	788	G protein-coupled receptor signaling pathway	1.6094	0.351569
GO:0050817	0.113331	1.30362	22.0104	28	372	coagulation	3.67644	0.353026
GO:0043524	0.113702	1.45302	10.6502	15	180	negative regulation of neuron apoptotic process	8.41204	0.353724
GO:0050796	0.114083	1.41568	12.3661	17	209	regulation of insulin secretion	7.0715	0.354452
GO:0015918	0.114329	1.65138	5.6801	9	96	sterol transport	17.7441	0.354594
GO:0006928	0.114455	1.12318	135.908	149	2297	movement of cell or subcellular component	0.51312	0.354594
GO:0048646	0.11457	1.1625	73.8414	84	1248	anatomical structure formation involved in morphogenesis	0.979953	0.354594
GO:0044106	0.114981	1.47183	9.82185	14	166	cellular amine metabolic process	9.23138	0.35541
GO:1904036	0.116623	2.04434	2.60338	5	44	negative regulation of epithelial cell apoptotic process	46.9267	0.360022
GO:0090276	0.116777	1.38124	14.1411	19	239	regulation of peptide hormone secretion	6.04384	0.360036
GO:0021575	0.119345	1.8765	3.37256	6	57	hindbrain morphogenesis	33.5549	0.367486
GO:0031016	0.119821	1.6325	5.73927	9	97	pancreas development	17.3802	0.368481
GO:0031669	0.120197	1.37489	14.2003	19	240	cellular response to nutrient levels	5.99358	0.369167
GO:0007611	0.121022	1.36122	15.0878	20	255	learning or memory	5.58862	0.371086
GO:0008637	0.12113	1.50918	8.22432	12	139	apoptotic mitochondrial changes	11.2851	0.371086
GO:0048839	0.121378	1.40088	12.4844	17	211	inner ear development	6.93807	0.371372
GO:0032024	0.12322	1.67978	4.97009	8	84	positive regulation of insulin secretion	20.6009	0.376056
GO:0006635	0.12322	1.67978	4.97009	8	84	fatty acid beta-oxidation	20.6009	0.376056
GO:1902600	0.124711	1.47281	9.11183	13	154	proton transmembrane transport	9.95994	0.378664
GO:0098609	0.125135	1.18187	53.5468	62	905	cell-cell adhesion	1.37546	0.378664
GO:0009395	0.125202	1.99309	2.66255	5	45	phospholipid catabolic process	44.8642	0.378664
GO:0006656	0.125202	1.99309	2.66255	5	45	phosphatidylcholine biosynthetic process	44.8642	0.378664
GO:0032881	0.125202	1.99309	2.66255	5	45	regulation of polysaccharide metabolic process	44.8642	0.378664
GO:0070839	0.125202	1.99309	2.66255	5	45	metal ion export	44.8642	0.378664
GO:0071495	0.125264	1.14111	90.4083	101	1528	cellular response to endogenous stimulus	0.786013	0.378664
GO:0007043	0.125641	1.42678	10.8277	15	183	cell-cell junction assembly	8.13849	0.378664
GO:0009166	0.125793	1.74491	4.20091	7	71	nucleotide catabolic process	25.2311	0.378664
GO:0002062	0.125803	1.49729	8.28349	12	140	chondrocyte differentiation	11.1245	0.378664
GO:0002576	0.125803	1.49729	8.28349	12	140	platelet degranulation	11.1245	0.378664
GO:0055017	0.126393	1.56514	6.62679	10	112	cardiac muscle tissue growth	14.485	0.379583
GO:0090100	0.126423	1.52735	7.45514	11	126	positive regulation of transmembrane receptor protein serine/threonine kinase signaling pathway	12.5894	0.379583
GO:0018198	0.126875	1.84028	3.43173	6	58	peptidyl-cysteine modification	32.4078	0.379994
GO:0045197	0.126875	1.84028	3.43173	6	58	establishment or maintenance of epithelial cell apical/basal polarity	32.4078	0.379994
GO:0048732	0.127374	1.24062	30.4714	37	515	gland development	2.53479	0.381015
GO:0051094	0.127731	1.14545	82.894	93	1401	positive regulation of developmental process	0.860918	0.381609
GO:0031668	0.128267	1.33817	16.0936	21	272	cellular response to extracellular stimulus	5.15747	0.382736
GO:0048598	0.129289	1.21314	37.8674	45	640	embryonic morphogenesis	1.99622	0.385242
GO:0002532	0.129426	1.65785	5.02926	8	85	production of molecular mediator involved in inflammatory response	20.119	0.385242
GO:0050896	0.131008	1.0827	489.14	506	8267	response to stimulus	0.134527	0.38947
GO:0043409	0.131507	1.39724	11.7744	16	199	negative regulation of MAPK cascade	7.34123	0.389993
GO:0007188	0.131507	1.39724	11.7744	16	199	adenylate cyclase-modulating G protein-coupled receptor signaling pathway	7.34123	0.389993
GO:0048678	0.131789	1.54984	6.68596	10	113	response to axon injury	14.2298	0.390348
GO:0006026	0.132689	1.71795	4.26008	7	72	aminoglycan catabolic process	24.5351	0.391072
GO:0003407	0.132689	1.71795	4.26008	7	72	neural retina development	24.5351	0.391072
GO:1903351	0.132689	1.71795	4.26008	7	72	cellular response to dopamine	24.5351	0.391072
GO:0042551	0.134062	1.94435	2.72172	5	46	neuron maturation	42.9348	0.391072
GO:0046427	0.134062	1.94435	2.72172	5	46	positive regulation of receptor signaling pathway via JAK-STAT	42.9348	0.391072
GO:0032371	0.134062	1.94435	2.72172	5	46	regulation of sterol transport	42.9348	0.391072
GO:0032374	0.134062	1.94435	2.72172	5	46	regulation of cholesterol transport	42.9348	0.391072
GO:0003230	0.134062	1.94435	2.72172	5	46	cardiac atrium development	42.9348	0.391072
GO:0030224	0.134062	1.94435	2.72172	5	46	monocyte differentiation	42.9348	0.391072
GO:0034383	0.134062	1.94435	2.72172	5	46	low-density lipoprotein particle clearance	42.9348	0.391072
GO:0097300	0.134629	1.80543	3.4909	6	59	programmed necrotic cell death	31.3186	0.391072
GO:0031050	0.134629	1.80543	3.4909	6	59	dsRNA processing	31.3186	0.391072
GO:0043392	0.134629	1.80543	3.4909	6	59	negative regulation of DNA binding	31.3186	0.391072
GO:0009409	0.134629	1.80543	3.4909	6	59	response to cold	31.3186	0.391072
GO:0048546	0.134629	1.80543	3.4909	6	59	digestive tract morphogenesis	31.3186	0.391072
GO:0070918	0.134629	1.80543	3.4909	6	59	production of small RNA involved in gene silencing by RNA	31.3186	0.391072
GO:0048738	0.135171	1.31789	17.0995	22	289	cardiac muscle tissue development	4.7861	0.392174
GO:0000165	0.136846	1.16969	55.7952	64	943	MAPK cascade	1.30771	0.396447
GO:0042472	0.137137	1.57836	5.91678	9	100	inner ear morphogenesis	16.353	0.396447
GO:0030510	0.137137	1.57836	5.91678	9	100	regulation of BMP signaling pathway	16.353	0.396447
GO:0006897	0.137549	1.2004	39.9382	47	675	endocytosis	1.87433	0.397162
GO:0006865	0.138276	1.40145	11.0052	15	186	amino acid transport	7.87808	0.398785
GO:0010038	0.138706	1.26957	22.5429	28	381	response to metal ion	3.5048	0.399547
GO:0048771	0.139731	1.38195	11.8927	16	201	tissue remodeling	7.19586	0.401168
GO:0030334	0.139764	1.15854	62.4811	71	1056	regulation of cell migration	1.15687	0.401168
GO:1903350	0.139768	1.6918	4.31925	7	73	response to dopamine	23.8675	0.401168
GO:0030278	0.140414	1.46269	8.46099	12	143	regulation of ossification	10.6626	0.402542
GO:2000026	0.140672	1.13389	88.1599	98	1490	regulation of multicellular organismal development	0.802063	0.402804
GO:0043627	0.142308	1.61565	5.14759	8	87	response to estrogen	19.2047	0.403787
GO:0034103	0.142308	1.61565	5.14759	8	87	regulation of tissue remodeling	19.2047	0.403787
GO:0045103	0.142601	1.77188	3.55007	6	60	intermediate filament-based process	30.2833	0.403787
GO:0042059	0.142601	1.77188	3.55007	6	60	negative regulation of epidermal growth factor receptor signaling pathway	30.2833	0.403787
GO:0140253	0.142601	1.77188	3.55007	6	60	cell-cell fusion	30.2833	0.403787
GO:1902893	0.142601	1.77188	3.55007	6	60	regulation of pri-miRNA transcription by RNA polymerase II	30.2833	0.403787
GO:0044273	0.142601	1.77188	3.55007	6	60	sulfur compound catabolic process	30.2833	0.403787
GO:0000768	0.142601	1.77188	3.55007	6	60	syncytium formation by plasma membrane fusion	30.2833	0.403787
GO:0030866	0.142601	1.77188	3.55007	6	60	cortical actin cytoskeleton organization	30.2833	0.403787
GO:0034404	0.142944	1.52011	6.80429	10	115	nucleobase-containing small molecule biosynthetic process	13.7391	0.403787
GO:0045638	0.143182	1.56109	5.97594	9	101	negative regulation of myeloid cell differentiation	16.0308	0.403787
GO:0042461	0.143193	1.89792	2.78088	5	47	photoreceptor cell development	41.1272	0.403787
GO:0019432	0.143193	1.89792	2.78088	5	47	triglyceride biosynthetic process	41.1272	0.403787
GO:0042594	0.144872	1.35829	12.8394	17	217	response to starvation	6.55971	0.408044
GO:0009743	0.145568	1.30297	17.277	22	292	response to carbohydrate	4.68826	0.409527
GO:0006469	0.145908	1.3212	15.502	20	262	negative regulation of protein kinase activity	5.29398	0.410005
GO:0006940	0.147026	1.66644	4.37841	7	74	regulation of smooth muscle contraction	23.2268	0.412667
GO:0071774	0.148154	1.42188	9.40767	13	159	response to fibroblast growth factor	9.34338	0.415349
GO:0051093	0.148344	1.16272	55.2035	63	933	negative regulation of developmental process	1.31502	0.415397
GO:1901655	0.148699	1.50566	6.86346	10	116	cellular response to ketone	13.5033	0.415908
GO:1901654	0.149019	1.35143	12.8986	17	218	response to ketone	6.49966	0.41632
GO:0007163	0.149488	1.30638	16.4486	21	278	establishment or maintenance of cell polarity	4.93724	0.417147
GO:0006949	0.150784	1.73954	3.60923	6	61	syncytium formation	29.2986	0.420278
GO:0034656	0.152584	1.85366	2.84005	5	48	nucleobase-containing small molecule catabolic process	39.4314	0.423855
GO:0070266	0.152584	1.85366	2.84005	5	48	necroptotic process	39.4314	0.423855
GO:0009260	0.152595	1.35961	12.0702	16	204	ribonucleotide biosynthetic process	6.98577	0.423855
GO:0022612	0.153108	1.41211	9.46684	13	160	gland morphogenesis	9.22695	0.42479
GO:0019216	0.153442	1.23735	25.5605	31	432	regulation of lipid metabolic process	3.01821	0.425227
GO:0006809	0.154459	1.64181	4.43758	7	75	nitric oxide biosynthetic process	22.6116	0.426395
GO:0035904	0.154459	1.64181	4.43758	7	75	aorta development	22.6116	0.426395
GO:0051145	0.154459	1.64181	4.43758	7	75	smooth muscle cell differentiation	22.6116	0.426395
GO:0032526	0.15457	1.49148	6.92263	10	117	response to retinoic acid	13.2734	0.426395
GO:0071260	0.155667	1.52766	6.09428	9	103	cellular response to mechanical stimulus	15.4143	0.427828
GO:0006767	0.155667	1.52766	6.09428	9	103	water-soluble vitamin metabolic process	15.4143	0.427828
GO:0001656	0.1558	1.57554	5.26593	8	89	metanephros development	18.3512	0.427828
GO:0051781	0.1558	1.57554	5.26593	8	89	positive regulation of cell division	18.3512	0.427828
GO:0035051	0.156182	1.36903	11.2419	15	190	cardiocyte differentiation	7.54986	0.42818
GO:0060249	0.156283	1.21826	29.288	35	495	anatomical structure homeostasis	2.59545	0.42818
GO:0045926	0.1574	1.30475	15.6795	20	265	negative regulation of growth	5.1748	0.430752
GO:0032496	0.158438	1.27081	19.2887	24	326	response to lipopolysaccharide	4.10328	0.432989
GO:0045596	0.158577	1.18267	40.4707	47	684	negative regulation of cell differentiation	1.82533	0.432989
GO:0051653	0.159172	1.70836	3.6684	6	62	spindle localization	28.3611	0.434122
GO:0008152	0.161069	1.08166	645.343	659	10907	metabolic process	0.100654	0.438799
GO:1901292	0.162062	1.61791	4.49675	7	76	nucleoside phosphate catabolic process	22.0204	0.438972
GO:1904894	0.162225	1.8114	2.89922	5	49	positive regulation of receptor signaling pathway via STAT	37.8384	0.438972
GO:0009593	0.162225	1.8114	2.89922	5	49	detection of chemical stimulus	37.8384	0.438972
GO:0006636	0.162225	1.8114	2.89922	5	49	unsaturated fatty acid biosynthetic process	37.8384	0.438972
GO:0007520	0.162225	1.8114	2.89922	5	49	myoblast fusion	37.8384	0.438972
GO:0030513	0.162225	1.8114	2.89922	5	49	positive regulation of BMP signaling pathway	37.8384	0.438972
GO:0002791	0.163201	1.25248	21.1821	26	358	regulation of peptide secretion	3.68606	0.441117
GO:0033673	0.164672	1.286	16.6853	21	282	negative regulation of kinase activity	4.79817	0.443993
GO:0002793	0.164673	1.37145	10.4727	14	177	positive regulation of peptide secretion	8.11963	0.443993
GO:0060322	0.164817	1.15416	53.7835	61	909	head development	1.3414	0.443993
GO:0033273	0.166654	1.46391	7.04096	10	119	response to vitamin	12.831	0.448021
GO:0045765	0.166684	1.26789	18.5195	23	313	regulation of angiogenesis	4.26574	0.448021
GO:0061014	0.167758	1.67827	3.72757	6	63	positive regulation of mRNA catabolic process	27.4679	0.449904
GO:0007606	0.167758	1.67827	3.72757	6	63	sensory perception of chemical stimulus	27.4679	0.449904
GO:0045667	0.16848	1.38357	9.64434	13	163	regulation of osteoblast differentiation	8.89044	0.451339
GO:0048638	0.168959	1.23051	24.0221	29	406	regulation of developmental growth	3.19669	0.452119
GO:0009988	0.169829	1.59468	4.55592	7	77	cell-cell recognition	21.4522	0.453057
GO:0030512	0.169829	1.59468	4.55592	7	77	negative regulation of transforming growth factor beta receptor signaling pathway	21.4522	0.453057
GO:0003333	0.169873	1.53736	5.38427	8	91	amino acid transmembrane transport	17.5534	0.453057
GO:0048639	0.170716	1.31817	13.1944	17	223	positive regulation of developmental growth	6.21147	0.454801
GO:0032268	0.171389	1.09248	153.126	164	2588	regulation of cellular protein metabolic process	0.444908	0.455977
GO:0060351	0.172103	1.77103	2.95839	5	50	cartilage development involved in endochondral bone morphogenesis	36.34	0.455977
GO:0035036	0.172103	1.77103	2.95839	5	50	sperm-egg recognition	36.34	0.455977
GO:0035329	0.172103	1.77103	2.95839	5	50	hippo signaling	36.34	0.455977
GO:0070268	0.172103	1.77103	2.95839	5	50	cornification	36.34	0.455977
GO:0030162	0.172403	1.16442	44.5533	51	753	regulation of proteolysis	1.63431	0.456134
GO:0060419	0.172861	1.45051	7.10013	10	120	heart growth	12.6181	0.456134
GO:0098739	0.172861	1.45051	7.10013	10	120	import across plasma membrane	12.6181	0.456134
GO:0050708	0.172919	1.25384	19.5254	24	330	regulation of protein secretion	4.00441	0.456134
GO:0006936	0.173947	1.23025	23.1938	28	392	muscle contraction	3.31086	0.458345
GO:0010001	0.17424	1.29171	15.0286	19	254	glial cell differentiation	5.35108	0.458617
GO:0042592	0.175462	1.10154	118.336	128	2000	homeostatic process	0.58144	0.46133
GO:0010823	0.176533	1.64922	3.78674	6	64	negative regulation of mitochondrion organization	26.6162	0.463135
GO:0030850	0.176533	1.64922	3.78674	6	64	prostate gland development	26.6162	0.463135
GO:0045595	0.177008	1.10835	100.999	110	1707	regulation of cell differentiation	0.685931	0.463877
GO:0033013	0.177755	1.57211	4.61508	7	78	tetrapyrrole metabolic process	20.9057	0.46474
GO:0010517	0.177755	1.57211	4.61508	7	78	regulation of phospholipase activity	20.9057	0.46474
GO:0040012	0.177916	1.12981	68.3979	76	1156	regulation of locomotion	1.03336	0.46474
GO:0030879	0.179142	1.36518	9.76268	13	165	mammary gland development	8.67622	0.467438
GO:0006022	0.179892	1.34639	10.6502	14	180	aminoglycan metabolic process	7.85123	0.468886
GO:0006937	0.180201	1.33054	11.5377	15	195	regulation of muscle contraction	7.16765	0.469184
GO:0007417	0.18049	1.13017	66.5637	74	1125	central nervous system development	1.06238	0.469429
GO:1901342	0.181935	1.25029	18.7562	23	317	regulation of vasculature development	4.15876	0.472363
GO:1901889	0.182206	1.7324	3.01756	5	51	negative regulation of cell junction assembly	34.9289	0.472363
GO:0032467	0.182206	1.7324	3.01756	5	51	positive regulation of cytokinesis	34.9289	0.472363
GO:0048562	0.183393	1.25555	17.8687	22	302	embryonic organ morphogenesis	4.38292	0.47493
GO:0048762	0.18376	1.28922	14.2594	18	241	mesenchymal cell differentiation	5.6311	0.475371
GO:0006470	0.184504	1.22973	21.5371	26	364	protein dephosphorylation	3.56554	0.476782
GO:0043467	0.185114	1.33823	10.7094	14	181	regulation of generation of precursor metabolites and energy	7.76472	0.477051
GO:0007420	0.185288	1.14639	50.5293	57	854	brain development	1.42008	0.477051
GO:0097345	0.18549	1.62116	3.8459	6	65	mitochondrial outer membrane permeabilization	25.8036	0.477051
GO:1901185	0.18549	1.62116	3.8459	6	65	negative regulation of ERBB signaling pathway	25.8036	0.477051
GO:0010906	0.185597	1.4244	7.21847	10	122	regulation of glucose metabolic process	12.2077	0.477051
GO:0048511	0.188085	1.23731	19.762	24	334	rhythmic process	3.90907	0.482931
GO:0030072	0.188943	1.25657	17.0403	21	288	peptide hormone secretion	4.60033	0.484594
GO:2000145	0.189231	1.12626	65.8537	73	1113	regulation of cell motility	1.07075	0.484594
GO:2000045	0.189335	1.3678	8.9935	12	152	regulation of G1/S transition of mitotic cell cycle	9.43733	0.484594
GO:1903580	0.192521	1.69543	3.07672	5	52	positive regulation of ATP metabolic process	33.5984	0.491704
GO:0021587	0.192521	1.69543	3.07672	5	52	cerebellum morphogenesis	33.5984	0.491704
GO:0046209	0.194063	1.52883	4.73342	7	80	nitric oxide metabolic process	19.8734	0.494097
GO:0035308	0.194063	1.52883	4.73342	7	80	negative regulation of protein dephosphorylation	19.8734	0.494097
GO:0061337	0.194073	1.38188	8.16515	11	138	cardiac conduction	10.4952	0.494097
GO:1902110	0.194621	1.59403	3.90507	6	66	positive regulation of mitochondrial membrane permeability involved in apoptotic process	25.0275	0.494422
GO:0070265	0.194621	1.59403	3.90507	6	66	necrotic cell death	25.0275	0.494422
GO:0007179	0.194816	1.29668	12.6027	16	213	transforming growth factor beta receptor signaling pathway	6.4079	0.494422
GO:0006821	0.196099	1.43541	6.44928	9	109	chloride transport	13.764	0.497156
GO:0051146	0.197791	1.22177	20.827	25	352	striated muscle cell differentiation	3.66614	0.500918
GO:0007267	0.199207	1.09814	102.715	111	1736	cell-cell signaling	0.669235	0.503975
GO:0003073	0.199643	1.46627	5.62094	8	95	regulation of systemic arterial blood pressure	16.1064	0.504547
GO:0007605	0.200342	1.37099	8.22432	11	139	sensory perception of sound	10.3447	0.505784
GO:0050714	0.201169	1.34835	9.11183	12	154	positive regulation of protein secretion	9.19379	0.506896
GO:0048592	0.201208	1.31434	10.8869	14	184	eye morphogenesis	7.51359	0.506896
GO:0009267	0.201413	1.3298	9.99935	13	169	cellular response to starvation	8.27037	0.506896
GO:0060350	0.202433	1.50807	4.79259	7	81	endochondral bone morphogenesis	19.3858	0.508837
GO:0034330	0.202887	1.13828	49.0501	55	829	cell junction organization	1.45415	0.508837
GO:0017158	0.203036	1.65999	3.13589	5	53	regulation of calcium ion-dependent exocytosis	32.3425	0.508837
GO:0051293	0.203036	1.65999	3.13589	5	53	establishment of spindle localization	32.3425	0.508837
GO:0043470	0.203239	1.42109	6.50845	9	110	regulation of carbohydrate catabolic process	13.5149	0.508837
GO:0021695	0.203916	1.56779	3.96424	6	67	cerebellar cortex development	24.286	0.510003
GO:0046887	0.206698	1.36026	8.28349	11	140	positive regulation of hormone secretion	10.1974	0.515389
GO:0030902	0.206711	1.30656	10.946	14	185	hindbrain development	7.43258	0.515389
GO:0009952	0.206711	1.30656	10.946	14	185	anterior/posterior pattern specification	7.43258	0.515389
GO:0060041	0.207207	1.33883	9.171	12	155	retina development in camera-type eye	9.07555	0.515557
GO:0010675	0.207207	1.33883	9.171	12	155	regulation of cellular carbohydrate metabolic process	9.07555	0.515557
GO:0061035	0.21094	1.48786	4.85176	7	82	regulation of cartilage development	18.9158	0.524305
GO:0031400	0.211391	1.15251	37.8674	43	640	negative regulation of protein modification process	1.9075	0.524885
GO:0032515	0.213369	1.54239	4.02341	6	68	negative regulation of phosphoprotein phosphatase activity	23.577	0.528708
GO:0051148	0.213369	1.54239	4.02341	6	68	negative regulation of muscle cell differentiation	23.577	0.528708
GO:0043549	0.214205	1.11849	60.7653	67	1027	regulation of kinase activity	1.15422	0.530213
GO:0043603	0.214416	1.11089	69.4038	76	1173	cellular amide metabolic process	1.00363	0.530213
GO:0051246	0.214903	1.0755	161.705	171	2733	regulation of protein metabolic process	0.415979	0.530872
GO:0003341	0.21527	1.43312	5.73927	8	97	cilium movement	15.449	0.531235
GO:0007169	0.215733	1.12945	50.2926	56	850	transmembrane receptor protein tyrosine kinase signaling pathway	1.40833	0.531832
GO:0016311	0.216225	1.16248	32.3056	37	546	dephosphorylation	2.25513	0.5325
GO:0006814	0.216669	1.28011	11.9519	15	202	sodium ion transport	6.67949	0.532859
GO:0090257	0.217186	1.23301	16.5078	20	279	regulation of muscle system process	4.66849	0.532859
GO:0018212	0.217399	1.18997	23.9038	28	404	peptidyl-tyrosine modification	3.1171	0.532859
GO:0098661	0.217833	1.39331	6.62679	9	112	inorganic anion transmembrane transport	13.0365	0.532859
GO:0007338	0.217833	1.39331	6.62679	9	112	single fertilization	13.0365	0.532859
GO:0045766	0.217917	1.29128	11.0644	14	187	positive regulation of angiogenesis	7.27444	0.532859
GO:1904018	0.217917	1.29128	11.0644	14	187	positive regulation of vasculature development	7.27444	0.532859
GO:0007498	0.21918	1.36306	7.5143	10	127	mesoderm development	11.2654	0.534206
GO:0046883	0.219394	1.22386	17.4545	21	295	regulation of hormone secretion	4.3846	0.534206
GO:0046328	0.219514	1.32018	9.28934	12	157	regulation of JNK cascade	8.84579	0.534206
GO:0043410	0.219518	1.16012	32.3648	37	547	positive regulation of MAPK cascade	2.24689	0.534206
GO:0035019	0.219576	1.46818	4.91092	7	83	somatic stem cell population maintenance	18.4628	0.534206
GO:0009880	0.222969	1.5178	4.08257	6	69	embryonic pattern specification	22.8986	0.541369
GO:0061005	0.222969	1.5178	4.08257	6	69	cell differentiation involved in kidney development	22.8986	0.541369
GO:0002526	0.223254	1.4171	5.79844	8	98	acute inflammatory response	15.1354	0.541515
GO:0002237	0.224577	1.20164	20.2945	24	343	response to molecule of bacterial origin	3.70662	0.542087
GO:0072348	0.224614	1.59337	3.25423	5	55	sulfur compound transport	30.0331	0.542087
GO:0035196	0.224614	1.59337	3.25423	5	55	production of miRNAs involved in gene silencing by miRNA	30.0331	0.542087
GO:0007218	0.224614	1.59337	3.25423	5	55	neuropeptide signaling pathway	30.0331	0.542087
GO:2000351	0.224614	1.59337	3.25423	5	55	regulation of endothelial cell apoptotic process	30.0331	0.542087
GO:0007229	0.225279	1.37981	6.68596	9	113	integrin-mediated signaling pathway	12.8068	0.543148
GO:0032409	0.226493	1.22338	16.6261	20	281	regulation of transporter activity	4.60227	0.545179
GO:0030073	0.226574	1.23842	14.7919	18	250	insulin secretion	5.23296	0.545179
GO:1901214	0.227087	1.19004	22.1879	26	375	regulation of neuron death	3.35943	0.545868
GO:0022617	0.228336	1.44901	4.97009	7	84	extracellular matrix disassembly	18.0258	0.547234
GO:0001942	0.228336	1.44901	4.97009	7	84	hair follicle development	18.0258	0.547234
GO:0050886	0.228336	1.44901	4.97009	7	84	endocrine process	18.0258	0.547234
GO:0008284	0.230015	1.1171	54.4343	60	920	positive regulation of cell population proliferation	1.28804	0.55071
GO:0050954	0.232115	1.30203	9.40767	12	159	sensory perception of mechanical stimulus	8.62466	0.553578
GO:0008643	0.232115	1.30203	9.40767	12	159	carbohydrate transport	8.62466	0.553578
GO:0051270	0.232184	1.10182	70.8238	77	1197	regulation of cellular component movement	0.976467	0.553578
GO:0038034	0.232709	1.49399	4.14174	6	70	signal transduction in absence of ligand	22.249	0.553578
GO:0097192	0.232709	1.49399	4.14174	6	70	extrinsic apoptotic signaling pathway in absence of ligand	22.249	0.553578
GO:0061614	0.232709	1.49399	4.14174	6	70	pri-miRNA transcription by RNA polymerase II	22.249	0.553578
GO:0055006	0.23282	1.36658	6.74512	9	114	cardiac cell development	12.5831	0.553578
GO:0048145	0.233251	1.33996	7.63264	10	129	regulation of fibroblast proliferation	10.9188	0.554058
GO:0048545	0.233667	1.17293	25.0871	29	424	response to steroid hormone	2.93104	0.554498
GO:0022898	0.233934	1.22288	15.7978	19	267	regulation of transmembrane transporter activity	4.84268	0.554586
GO:0070374	0.235201	1.269	11.2419	14	190	positive regulation of ERK1 and ERK2 cascade	7.04654	0.556467
GO:0010565	0.235201	1.269	11.2419	14	190	regulation of cellular ketone metabolic process	7.04654	0.556467
GO:0045668	0.23565	1.56202	3.31339	5	56	negative regulation of osteoblast differentiation	28.97	0.556467
GO:0050999	0.23565	1.56202	3.31339	5	56	regulation of nitric-oxide synthase activity	28.97	0.556467
GO:0045937	0.236932	1.10468	64.197	70	1085	positive regulation of phosphate metabolic process	1.08042	0.558399
GO:0010562	0.236932	1.10468	64.197	70	1085	positive regulation of phosphorus metabolic process	1.08042	0.558399
GO:0046889	0.237212	1.43033	5.02926	7	85	positive regulation of lipid biosynthetic process	17.6042	0.558514
GO:0048144	0.240411	1.3287	7.69181	10	130	fibroblast proliferation	10.7515	0.565036
GO:0035335	0.240451	1.35359	6.80429	9	115	peptidyl-tyrosine dephosphorylation	12.3652	0.565036
GO:0032412	0.241746	1.22235	14.9694	18	253	regulation of ion transmembrane transporter activity	5.10959	0.567036
GO:0046879	0.241773	1.18642	20.5312	24	347	hormone secretion	3.62166	0.567036
GO:1902108	0.242578	1.4709	4.20091	6	71	regulation of mitochondrial membrane permeability involved in apoptotic process	21.6267	0.56727
GO:1902686	0.242578	1.4709	4.20091	6	71	mitochondrial outer membrane permeabilization involved in programmed cell death	21.6267	0.56727
GO:0086001	0.242578	1.4709	4.20091	6	71	cardiac muscle cell action potential	21.6267	0.56727
GO:0043583	0.244621	1.22741	14.0819	17	238	ear development	5.45318	0.570034
GO:0042552	0.244994	1.28438	9.52601	12	161	myelination	8.41171	0.570034
GO:0090596	0.245623	1.20458	16.8628	20	285	sensory organ morphogenesis	4.47399	0.570034
GO:0050790	0.245991	1.06857	147.15	155	2487	regulation of catalytic activity	0.455339	0.570034
GO:0046425	0.246199	1.41213	5.08843	7	86	regulation of receptor signaling pathway via JAK-STAT	17.1971	0.570034
GO:0033627	0.246199	1.41213	5.08843	7	86	cell adhesion mediated by integrin	17.1971	0.570034
GO:0022404	0.246199	1.41213	5.08843	7	86	molting cycle process	17.1971	0.570034
GO:0022405	0.246199	1.41213	5.08843	7	86	hair cycle process	17.1971	0.570034
GO:0048608	0.246425	1.15403	28.1047	32	475	reproductive structure development	2.57702	0.570034
GO:0045598	0.246534	1.29926	8.63849	11	146	regulation of fat cell differentiation	9.37652	0.570034
GO:0035850	0.246834	1.53187	3.37256	5	57	epithelial cell differentiation involved in kidney development	27.9624	0.570034
GO:0021545	0.246834	1.53187	3.37256	5	57	cranial nerve development	27.9624	0.570034
GO:0099601	0.246834	1.53187	3.37256	5	57	regulation of neurotransmitter receptor activity	27.9624	0.570034
GO:0048010	0.24765	1.31763	7.75098	10	131	vascular endothelial growth factor receptor signaling pathway	10.588	0.571229
GO:0001657	0.247825	1.3711	5.97594	8	101	ureteric bud development	14.2496	0.571229
GO:0007569	0.248168	1.34085	6.86346	9	116	cell aging	12.1529	0.571474
GO:0010634	0.24937	1.26423	10.4727	13	177	positive regulation of epithelial cell migration	7.53966	0.573694
GO:0042327	0.250658	1.10218	59.7003	65	1009	positive regulation of phosphorylation	1.16007	0.576108
GO:0006468	0.251257	1.07792	104.313	111	1763	protein phosphorylation	0.648893	0.576934
GO:0035304	0.251532	1.27572	9.58518	12	162	regulation of protein dephosphorylation	8.30818	0.577016
GO:0097305	0.252087	1.21187	15.0878	18	255	response to alcohol	5.02976	0.577191
GO:1901215	0.252087	1.21187	15.0878	18	255	negative regulation of neuron death	5.02976	0.577191
GO:0051851	0.252568	1.44851	4.26008	6	72	modulation by host of symbiont process	21.0301	0.577743
GO:0071901	0.253432	1.28962	8.69766	11	147	negative regulation of protein serine/threonine kinase activity	9.24939	0.579171
GO:0043666	0.254963	1.30674	7.81014	10	132	regulation of phosphoprotein phosphatase activity	10.4281	0.581533
GO:0030534	0.254963	1.30674	7.81014	10	132	adult behavior	10.4281	0.581533
GO:0042102	0.255289	1.39438	5.14759	7	87	positive regulation of T cell proliferation	16.8041	0.581533
GO:0046777	0.255431	1.19539	16.9811	20	287	protein autophosphorylation	4.41185	0.581533
GO:0072163	0.256205	1.35642	6.03511	8	102	mesonephric epithelium development	13.9715	0.582196
GO:0072164	0.256205	1.35642	6.03511	8	102	mesonephric tubule development	13.9715	0.582196
GO:0045104	0.25815	1.50287	3.43173	5	58	intermediate filament cytoskeleton organization	27.0065	0.586065
GO:0001501	0.26088	1.13248	33.0748	37	559	skeletal system development	2.15146	0.591703
GO:0061458	0.261709	1.14338	28.3414	32	479	reproductive system development	2.53416	0.593027
GO:0033555	0.262669	1.42679	4.31925	6	73	multicellular organismal response to stress	20.4579	0.594644
GO:0042471	0.263846	1.31606	6.98179	9	118	ear morphogenesis	11.7445	0.596649
GO:0003170	0.264477	1.37707	5.20676	7	88	heart valve development	16.4243	0.596649
GO:0002027	0.264671	1.34205	6.09428	8	103	regulation of heart rate	13.7016	0.596649
GO:0007272	0.264793	1.25876	9.70351	12	164	ensheathment of neurons	8.10678	0.596649
GO:0008366	0.264793	1.25876	9.70351	12	164	axon ensheathment	8.10678	0.596649
GO:0018108	0.269557	1.15246	23.7263	27	401	peptidyl-tyrosine phosphorylation	3.05091	0.60624
GO:2001244	0.269588	1.47493	3.4909	5	59	positive regulation of intrinsic apoptotic signaling pathway	26.0988	0.60624
GO:0120034	0.269803	1.28548	7.92848	10	134	positive regulation of plasma membrane bounded cell projection assembly	10.1192	0.60624
GO:0098657	0.271314	1.22665	11.5969	14	196	import into cell	6.62172	0.608941
GO:0050680	0.27151	1.25045	9.76268	12	165	negative regulation of epithelial cell proliferation	8.00882	0.608941
GO:0032879	0.271852	1.05702	172.592	180	2917	regulation of localization	0.384375	0.60914
GO:0019932	0.2727	1.16521	19.9987	23	338	second-messenger-mediated signaling	3.65805	0.609728
GO:1904888	0.272873	1.40571	4.37841	6	74	cranial skeletal system development	19.9087	0.609728
GO:0001707	0.272873	1.40571	4.37841	6	74	mesoderm formation	19.9087	0.609728
GO:0031100	0.273754	1.36018	5.26593	7	89	animal organ regeneration	16.0573	0.611131
GO:0055123	0.274516	1.26152	8.87516	11	150	digestive system development	8.88311	0.612265
GO:1990823	0.277322	1.27511	7.98765	10	135	response to leukemia inhibitory factor	9.96982	0.617381
GO:1990830	0.277322	1.27511	7.98765	10	135	cellular response to leukemia inhibitory factor	9.96982	0.617381
GO:0015698	0.278283	1.24224	9.82185	12	166	inorganic anion transport	7.91261	0.618948
GO:0009725	0.279416	1.08834	61.2978	66	1036	response to hormone	1.11732	0.61957
GO:0032872	0.279706	1.20806	12.6027	15	213	regulation of stress-activated MAPK cascade	6.00741	0.61957
GO:0060999	0.281132	1.44802	3.55007	5	60	positive regulation of dendritic spine development	25.2361	0.61957
GO:0097722	0.281132	1.44802	3.55007	5	60	sperm motility	25.2361	0.61957
GO:0050766	0.281132	1.44802	3.55007	5	60	positive regulation of phagocytosis	25.2361	0.61957
GO:0050885	0.281132	1.44802	3.55007	5	60	neuromuscular process controlling balance	25.2361	0.61957
GO:0032873	0.281132	1.44802	3.55007	5	60	negative regulation of stress-activated MAPK cascade	25.2361	0.61957
GO:0070303	0.281132	1.44802	3.55007	5	60	negative regulation of stress-activated protein kinase signaling cascade	25.2361	0.61957
GO:0030317	0.281132	1.44802	3.55007	5	60	flagellated sperm motility	25.2361	0.61957
GO:0045124	0.281132	1.44802	3.55007	5	60	regulation of bone resorption	25.2361	0.61957
GO:0006109	0.281492	1.19793	13.5494	16	229	regulation of carbohydrate metabolic process	5.54375	0.61961
GO:0048593	0.281664	1.25242	8.93433	11	151	camera-type eye morphogenesis	8.76584	0.61961
GO:1904892	0.283115	1.3437	5.3251	7	90	regulation of receptor signaling pathway via STAT	15.7025	0.621221
GO:0060021	0.283115	1.3437	5.3251	7	90	roof of mouth development	15.7025	0.621221
GO:0070527	0.28317	1.38524	4.43758	6	75	platelet aggregation	19.3813	0.621221
GO:0002761	0.284903	1.2649	8.04681	10	136	regulation of myeloid leukocyte differentiation	9.82375	0.622756
GO:0035270	0.284903	1.2649	8.04681	10	136	endocrine system development	9.82375	0.622756
GO:0048565	0.284903	1.2649	8.04681	10	136	digestive tract development	9.82375	0.622756
GO:0045471	0.284903	1.2649	8.04681	10	136	response to ethanol	9.82375	0.622756
GO:0060537	0.285343	1.12775	28.6964	32	485	muscle tissue development	2.47185	0.623155
GO:0045597	0.28652	1.09045	54.671	59	924	positive regulation of cell differentiation	1.25563	0.624647
GO:0032868	0.286923	1.15397	20.1762	23	341	response to insulin	3.59397	0.624647
GO:0060070	0.287063	1.14998	21.1229	24	357	canonical Wnt signaling pathway	3.4216	0.624647
GO:0043405	0.287063	1.14998	21.1229	24	357	regulation of MAP kinase activity	3.4216	0.624647
GO:0065009	0.28752	1.05141	184.958	192	3126	regulation of molecular function	0.357008	0.625078
GO:0019218	0.287907	1.28054	7.1593	9	121	regulation of steroid metabolic process	11.1693	0.625356
GO:0007612	0.288867	1.24345	8.9935	11	152	learning	8.65088	0.626875
GO:0045859	0.290514	1.08944	53.7835	58	909	regulation of protein kinase activity	1.27543	0.629362
GO:0050905	0.290535	1.30069	6.27178	8	106	neuromuscular process	12.937	0.629362
GO:0007626	0.29179	1.19581	12.7211	15	215	locomotory behavior	5.89616	0.630153
GO:1902476	0.292551	1.32761	5.38427	7	91	chloride transmembrane transport	15.3593	0.630153
GO:1901016	0.29277	1.42206	3.60923	5	61	regulation of potassium ion transmembrane transporter activity	24.4155	0.630153
GO:0009145	0.29277	1.42206	3.60923	5	61	purine nucleoside triphosphate biosynthetic process	24.4155	0.630153
GO:0042509	0.29355	1.36536	4.49675	6	76	regulation of tyrosine phosphorylation of STAT protein	18.8747	0.630153
GO:1905710	0.29355	1.36536	4.49675	6	76	positive regulation of membrane permeability	18.8747	0.630153
GO:0035794	0.29355	1.36536	4.49675	6	76	positive regulation of mitochondrial membrane permeability	18.8747	0.630153
GO:0048332	0.29355	1.36536	4.49675	6	76	mesoderm morphogenesis	18.8747	0.630153
GO:0043523	0.294246	1.17864	14.6144	17	247	regulation of neuron apoptotic process	5.06302	0.630153
GO:0060173	0.294441	1.21188	10.8869	13	184	limb development	6.9769	0.630153
GO:0048736	0.294441	1.21188	10.8869	13	184	appendage development	6.9769	0.630153
GO:0051302	0.294441	1.21188	10.8869	13	184	regulation of cell division	6.9769	0.630153
GO:0051100	0.294441	1.21188	10.8869	13	184	negative regulation of binding	6.9769	0.630153
GO:0048729	0.294559	1.09704	44.1983	48	747	tissue morphogenesis	1.56299	0.630153
GO:0070997	0.295374	1.1312	25.028	28	423	neuron death	2.84336	0.631256
GO:0090101	0.296056	1.26912	7.21847	9	122	negative regulation of transmembrane receptor protein serine/threonine kinase signaling pathway	10.987	0.631256
GO:1902107	0.296122	1.23461	9.05267	11	153	positive regulation of leukocyte differentiation	8.53817	0.631256
GO:1903708	0.296122	1.23461	9.05267	11	153	positive regulation of hemopoiesis	8.53817	0.631256
GO:0003012	0.296794	1.11838	29.8205	33	504	muscle system process	2.36052	0.63213
GO:0070302	0.297892	1.18978	12.7802	15	216	regulation of stress-activated protein kinase signaling cascade	5.84169	0.633907
GO:0050730	0.301058	1.16091	16.567	19	280	regulation of peptidyl-tyrosine phosphorylation	4.40344	0.639545
GO:1902806	0.301071	1.20475	10.946	13	185	regulation of cell cycle G1/S phase transition	6.90168	0.639545
GO:0051153	0.302058	1.3119	5.44343	7	92	regulation of striated muscle cell differentiation	15.0272	0.640596
GO:0060285	0.304006	1.34604	4.55592	6	77	cilium-dependent cell motility	18.3876	0.640596
GO:0001539	0.304006	1.34604	4.55592	6	77	cilium or flagellum-dependent cell motility	18.3876	0.640596
GO:0003179	0.304006	1.34604	4.55592	6	77	heart valve morphogenesis	18.3876	0.640596
GO:0032835	0.304006	1.34604	4.55592	6	77	glomerulus development	18.3876	0.640596
GO:0007260	0.304006	1.34604	4.55592	6	77	tyrosine phosphorylation of STAT protein	18.3876	0.640596
GO:0099173	0.304032	1.1838	12.8394	15	217	postsynapse organization	5.78798	0.640596
GO:0099565	0.304261	1.2579	7.27763	9	123	chemical synaptic transmission, postsynaptic	10.809	0.640596
GO:1905953	0.304489	1.39701	3.6684	5	62	negative regulation of lipid localization	23.6342	0.640596
GO:0021879	0.304489	1.39701	3.6684	5	62	forebrain neuron differentiation	23.6342	0.640596
GO:0030501	0.304489	1.39701	3.6684	5	62	positive regulation of bone mineralization	23.6342	0.640596
GO:0007517	0.305607	1.13299	22.3062	25	377	muscle organ development	3.19604	0.642388
GO:0051348	0.306604	1.14696	18.5195	21	313	negative regulation of transferase activity	3.8948	0.643923
GO:0050866	0.307743	1.1977	11.0052	13	186	negative regulation of cell activation	6.82767	0.644841
GO:0031532	0.307978	1.23523	8.22432	10	139	actin cytoskeleton reorganization	9.40428	0.644841
GO:0045639	0.308111	1.2745	6.39012	8	108	positive regulation of myeloid cell differentiation	12.4623	0.644841
GO:0001823	0.308111	1.2745	6.39012	8	108	mesonephros development	12.4623	0.644841
GO:0046890	0.309158	1.187	11.9519	14	202	regulation of lipid biosynthetic process	6.23419	0.64647
GO:0000302	0.311466	1.16322	14.7919	17	250	response to reactive oxygen species	4.94224	0.648247
GO:0071868	0.311626	1.29656	5.5026	7	93	cellular response to monoamine stimulus	14.7057	0.648247
GO:0071870	0.311626	1.29656	5.5026	7	93	cellular response to catecholamine stimulus	14.7057	0.648247
GO:0009060	0.311626	1.29656	5.5026	7	93	aerobic respiration	14.7057	0.648247
GO:0120162	0.311626	1.29656	5.5026	7	93	positive regulation of cold-induced thermogenesis	14.7057	0.648247
GO:0046902	0.311626	1.29656	5.5026	7	93	regulation of mitochondrial membrane permeability	14.7057	0.648247
GO:0072593	0.31189	1.1472	17.632	20	298	reactive oxygen species metabolic process	4.09216	0.648247
GO:0017015	0.31252	1.24688	7.3368	9	124	regulation of transforming growth factor beta receptor signaling pathway	10.6354	0.648996
GO:0030203	0.312883	1.20276	10.1177	12	171	glycosaminoglycan metabolic process	7.45665	0.649192
GO:0031399	0.313654	1.05693	106.029	111	1792	regulation of protein modification process	0.628061	0.649396
GO:0000003	0.313672	1.06526	79.5806	84	1345	reproduction	0.843703	0.649396
GO:0010243	0.313789	1.06956	69.8179	74	1180	response to organonitrogen compound	0.965656	0.649396
GO:0043407	0.314527	1.32725	4.61508	6	78	negative regulation of MAP kinase activity	17.9191	0.649806
GO:0048645	0.314527	1.32725	4.61508	6	78	animal organ formation	17.9191	0.649806
GO:0042531	0.316276	1.37283	3.72757	5	63	positive regulation of tyrosine phosphorylation of STAT protein	22.8899	0.650633
GO:0072577	0.316276	1.37283	3.72757	5	63	endothelial cell apoptotic process	22.8899	0.650633
GO:0050795	0.316276	1.37283	3.72757	5	63	regulation of behavior	22.8899	0.650633
GO:0014009	0.316276	1.37283	3.72757	5	63	glial cell proliferation	22.8899	0.650633
GO:0051289	0.316276	1.37283	3.72757	5	63	protein homotetramerization	22.8899	0.650633
GO:0098655	0.317406	1.08305	47.5117	51	803	cation transmembrane transport	1.43712	0.652401
GO:1903844	0.320826	1.23604	7.39597	9	125	regulation of cellular response to transforming growth factor beta stimulus	10.4659	0.658541
GO:0006644	0.32094	1.11206	26.3296	29	445	phospholipid metabolic process	2.66093	0.658541
GO:0045833	0.321251	1.28156	5.56177	7	94	negative regulation of lipid metabolic process	14.3945	0.658619
GO:0046034	0.321633	1.13165	19.6437	22	332	ATP metabolic process	3.62661	0.65871
GO:1901698	0.321842	1.06471	73.9005	78	1249	response to nitrogen compound	0.908499	0.65871
GO:0007610	0.323261	1.09464	35.0273	38	592	behavior	1.97013	0.661055
GO:0051149	0.325104	1.30898	4.67425	6	79	positive regulation of muscle cell differentiation	17.4684	0.664259
GO:0010212	0.325602	1.20045	9.28934	11	157	response to ionizing radiation	8.10865	0.664714
GO:0014812	0.325905	1.24934	6.50845	8	110	muscle cell migration	12.0132	0.664769
GO:0019933	0.328119	1.34947	3.78674	5	64	cAMP-mediated signaling	22.1802	0.668091
GO:1903307	0.328119	1.34947	3.78674	5	64	positive regulation of regulated secretory pathway	22.1802	0.668091
GO:0045637	0.328375	1.13869	16.8628	19	285	regulation of myeloid cell differentiation	4.25029	0.668091
GO:0001558	0.328642	1.10516	27.3947	30	463	regulation of cell growth	2.54281	0.668091
GO:0009790	0.330396	1.06417	68.2204	72	1153	embryo development	0.984076	0.671033
GO:0003208	0.330924	1.26691	5.62094	7	95	cardiac ventricle morphogenesis	14.0931	0.671033
GO:1900407	0.330924	1.26691	5.62094	7	95	regulation of cellular response to oxidative stress	14.0931	0.671033
GO:0021700	0.333916	1.13434	16.922	19	286	developmental maturation	4.22062	0.676531
GO:0022904	0.334869	1.23712	6.56762	8	111	respiratory electron transport chain	11.7977	0.677878
GO:0050731	0.335143	1.16195	12.1886	14	206	positive regulation of peptidyl-tyrosine phosphorylation	5.99444	0.677878
GO:0045600	0.335729	1.2912	4.73342	6	80	positive regulation of fat cell differentiation	17.0344	0.677925
GO:0030865	0.335729	1.2912	4.73342	6	80	cortical cytoskeleton organization	17.0344	0.677925
GO:0062197	0.337716	1.10852	23.6671	26	400	cellular response to chemical stress	2.95262	0.681367
GO:0034329	0.339029	1.09527	29.4655	32	498	cell junction assembly	2.34448	0.683444
GO:0006801	0.340005	1.32689	3.8459	5	65	superoxide metabolic process	21.503	0.684402
GO:0043434	0.340425	1.09121	31.4181	34	531	response to peptide hormone	2.19101	0.684402
GO:1990845	0.340576	1.18406	9.40767	11	159	adaptive thermogenesis	7.90594	0.684402
GO:0006110	0.34064	1.25259	5.6801	7	96	regulation of glycolytic process	13.801	0.684402
GO:0001934	0.341097	1.06807	53.7835	57	909	positive regulation of protein phosphorylation	1.25344	0.684708
GO:0071248	0.341644	1.16365	11.301	13	191	cellular response to metal ion	6.47488	0.684708
GO:0014065	0.341644	1.16365	11.301	13	191	phosphatidylinositol 3-kinase signaling	6.47488	0.684708
GO:0045927	0.343164	1.11956	18.9337	21	320	positive regulation of growth	3.72627	0.687183
GO:0046847	0.346393	1.27389	4.79259	6	81	filopodium assembly	16.6164	0.692121
GO:0014743	0.346393	1.27389	4.79259	6	81	regulation of muscle hypertrophy	16.6164	0.692121
GO:0022414	0.346491	1.05405	79.344	83	1341	reproductive process	0.83864	0.692121
GO:0098660	0.347186	1.07117	46.0917	49	779	inorganic ion transmembrane transport	1.46716	0.692935
GO:0071695	0.347919	1.14359	13.2536	15	224	anatomical structure maturation	5.43188	0.693206
GO:0017148	0.34811	1.17603	9.46684	11	160	negative regulation of translation	7.80742	0.693206
GO:0001889	0.348472	1.16568	10.4135	12	176	liver development	7.039	0.693206
GO:1905952	0.348472	1.16568	10.4135	12	176	regulation of lipid localization	7.039	0.693206
GO:0061564	0.349366	1.07754	38.3407	41	648	axon development	1.77414	0.693772
GO:0045913	0.350391	1.23859	5.73927	7	97	positive regulation of carbohydrate metabolic process	13.5179	0.693772
GO:0071867	0.350391	1.23859	5.73927	7	97	response to monoamine	13.5179	0.693772
GO:0071869	0.350391	1.23859	5.73927	7	97	response to catecholamine	13.5179	0.693772
GO:1903313	0.350391	1.23859	5.73927	7	97	positive regulation of mRNA metabolic process	13.5179	0.693772
GO:0001947	0.351922	1.30504	3.90507	5	66	heart looping	20.8563	0.693772
GO:0006027	0.351922	1.30504	3.90507	5	66	glycosaminoglycan catabolic process	20.8563	0.693772
GO:0032413	0.351922	1.30504	3.90507	5	66	negative regulation of ion transmembrane transporter activity	20.8563	0.693772
GO:0070059	0.351922	1.30504	3.90507	5	66	intrinsic apoptotic signaling pathway in response to endoplasmic reticulum stress	20.8563	0.693772
GO:0070169	0.351922	1.30504	3.90507	5	66	positive regulation of biomineral tissue development	20.8563	0.693772
GO:0110151	0.351922	1.30504	3.90507	5	66	positive regulation of biomineralization	20.8563	0.693772
GO:0001659	0.355679	1.15853	10.4727	12	177	temperature homeostasis	6.95969	0.700035
GO:0015908	0.355679	1.15853	10.4727	12	177	fatty acid transport	6.95969	0.700035
GO:0034762	0.356988	1.08219	31.6547	34	535	regulation of transmembrane transport	2.15837	0.701032
GO:0060998	0.357086	1.25704	4.85176	6	82	regulation of dendritic spine development	16.2136	0.701032
GO:0098916	0.357408	1.06985	42.3641	45	716	anterograde trans-synaptic signaling	1.59493	0.701032
GO:0007268	0.357408	1.06985	42.3641	45	716	chemical synaptic transmission	1.59493	0.701032
GO:0051338	0.35764	1.05446	67.8062	71	1146	regulation of transferase activity	0.9823	0.701032
GO:0062014	0.360171	1.22489	5.79844	7	98	negative regulation of small molecule metabolic process	13.2434	0.705419
GO:0032465	0.361971	1.20186	6.74512	8	114	regulation of cytokinesis	11.185	0.707468
GO:0032963	0.361971	1.20186	6.74512	8	114	collagen metabolic process	11.185	0.707468
GO:0048469	0.363258	1.1603	9.58518	11	162	cell maturation	7.61584	0.707468
GO:0046850	0.363858	1.28391	3.96424	5	67	regulation of bone remodeling	20.2384	0.707468
GO:0072132	0.363858	1.28391	3.96424	5	67	mesenchyme morphogenesis	20.2384	0.707468
GO:0035272	0.363858	1.28391	3.96424	5	67	exocrine system development	20.2384	0.707468
GO:0061371	0.363858	1.28391	3.96424	5	67	determination of heart left/right asymmetry	20.2384	0.707468
GO:0032768	0.363858	1.28391	3.96424	5	67	regulation of monooxygenase activity	20.2384	0.707468
GO:0034113	0.363858	1.28391	3.96424	5	67	heterotypic cell-cell adhesion	20.2384	0.707468
GO:0009605	0.364301	1.03497	157.741	162	2666	response to external stimulus	0.414142	0.70776
GO:0050804	0.366522	1.0814	28.8739	31	488	modulation of chemical synaptic transmission	2.36525	0.710929
GO:0099177	0.366522	1.0814	28.8739	31	488	regulation of trans-synaptic signaling	2.36525	0.710929
GO:0043954	0.367802	1.24063	4.91092	6	83	cellular component maintenance	15.8252	0.712265
GO:0014910	0.367802	1.24063	4.91092	6	83	regulation of smooth muscle cell migration	15.8252	0.712265
GO:0071214	0.369845	1.09281	22.1287	24	374	cellular response to abiotic stimulus	3.11762	0.713603
GO:0104004	0.369845	1.09281	22.1287	24	374	cellular response to environmental stimulus	3.11762	0.713603
GO:0042116	0.369972	1.21149	5.85761	7	99	macrophage activation	12.9772	0.713603
GO:0060993	0.369972	1.21149	5.85761	7	99	kidney morphogenesis	12.9772	0.713603
GO:0021510	0.369972	1.21149	5.85761	7	99	spinal cord development	12.9772	0.713603
GO:0045834	0.370866	1.15258	9.64434	11	163	positive regulation of lipid metabolic process	7.52268	0.714488
GO:0014013	0.371057	1.19054	6.80429	8	115	regulation of gliogenesis	10.9913	0.714488
GO:0007009	0.37132	1.16245	8.69766	10	147	plasma membrane organization	8.40853	0.714488
GO:0045165	0.373551	1.1218	13.4902	15	228	cell fate commitment	5.24296	0.718208
GO:0050918	0.375801	1.26344	4.02341	5	68	positive chemotaxis	19.6475	0.721957
GO:0009612	0.376669	1.10992	15.4428	17	261	response to mechanical stimulus	4.53443	0.723049
GO:0044703	0.377072	1.05445	52.4818	55	887	multi-organism reproductive process	1.27019	0.723245
GO:0048015	0.378347	1.11298	14.4961	16	245	phosphatidylinositol-mediated signaling	4.84332	0.724889
GO:1901379	0.37853	1.22464	4.97009	6	84	regulation of potassium ion transmembrane transport	15.4507	0.724889
GO:0014706	0.379348	1.07736	27.0988	29	458	striated muscle tissue development	2.51201	0.72513
GO:0043506	0.37979	1.19838	5.91678	7	100	regulation of JUN kinase activity	12.719	0.72513
GO:0001654	0.379914	1.08645	22.2471	24	376	eye development	3.08454	0.72513
GO:0050773	0.379953	1.16513	7.81014	9	132	regulation of dendrite development	9.38533	0.72513
GO:0008543	0.38016	1.17944	6.86346	8	116	fibroblast growth factor receptor signaling pathway	10.8026	0.72513
GO:0048468	0.380823	1.03308	135.435	139	2289	cell development	0.482035	0.725821
GO:0051047	0.384004	1.08855	20.3537	22	344	positive regulation of secretion	3.37801	0.731306
GO:0061008	0.384719	1.1308	10.7094	12	181	hepaticobiliary system development	6.65547	0.732089
GO:0071396	0.386064	1.06269	35.974	38	608	cellular response to lipid	1.8678	0.73407
GO:0046888	0.387741	1.24361	4.08257	5	69	negative regulation of hormone secretion	19.0821	0.736677
GO:0090066	0.388213	1.06262	35.0273	37	592	regulation of anatomical structure size	1.91829	0.736994
GO:0034765	0.388587	1.0668	31.1222	33	526	regulation of ion transmembrane transport	2.16719	0.737123
GO:0061053	0.389263	1.20906	5.02926	6	85	somite development	15.0893	0.737267
GO:0060079	0.389275	1.16853	6.92263	8	117	excitatory postsynaptic potential	10.6187	0.737267
GO:0060415	0.389617	1.18555	5.97594	7	101	muscle tissue morphogenesis	12.4684	0.737337
GO:0030168	0.392018	1.12407	10.7685	12	182	platelet activation	6.58254	0.741299
GO:0030036	0.394572	1.04843	50.8251	53	859	actin cytoskeleton organization	1.3051	0.7438
GO:0071900	0.394898	1.0624	32.1873	34	544	regulation of protein serine/threonine kinase activity	2.08755	0.7438
GO:0016049	0.394898	1.0624	32.1873	34	544	cell growth	2.08755	0.7438
GO:0030111	0.395366	1.07315	24.3771	26	412	regulation of Wnt signaling pathway	2.78313	0.7438
GO:0120161	0.395475	1.1373	8.87516	10	150	regulation of cold-induced thermogenesis	8.07556	0.7438
GO:0106106	0.395475	1.1373	8.87516	10	150	cold-induced thermogenesis	8.07556	0.7438
GO:0099536	0.3955	1.05206	43.9616	46	743	synaptic signaling	1.51403	0.7438
GO:0030308	0.397196	1.11298	11.7744	13	199	negative regulation of cell growth	5.96475	0.745272
GO:0022604	0.397746	1.07352	23.4304	25	396	regulation of cell morphogenesis	2.89671	0.745272
GO:0048699	0.398322	1.03282	101.236	104	1711	generation of neurons	0.645488	0.745272
GO:0007416	0.399328	1.11741	10.8277	12	183	synapse assembly	6.51079	0.745272
GO:0002065	0.399448	1.17299	6.03511	7	102	columnar/cuboidal epithelial cell differentiation	12.2251	0.745272
GO:0090181	0.399667	1.22439	4.14174	5	70	regulation of cholesterol metabolic process	18.5408	0.745272
GO:0048747	0.399667	1.22439	4.14174	5	70	muscle fiber development	18.5408	0.745272
GO:0021885	0.399667	1.22439	4.14174	5	70	forebrain cell migration	18.5408	0.745272
GO:1901652	0.399808	1.05524	37.1573	39	628	response to peptide	1.7968	0.745272
GO:0042063	0.399915	1.07827	20.5312	22	347	gliogenesis	3.31985	0.745272
GO:0043507	0.399992	1.19386	5.08843	6	86	positive regulation of JUN kinase activity	14.7404	0.745272
GO:0021766	0.399992	1.19386	5.08843	6	86	hippocampus development	14.7404	0.745272
GO:0099537	0.401411	1.05014	43.0741	45	728	trans-synaptic signaling	1.54278	0.747337
GO:0050808	0.404451	1.06212	28.4005	30	480	synapse organization	2.36589	0.752417
GO:0042476	0.405585	1.13715	7.98765	9	135	odontogenesis	8.97284	0.753944
GO:0002790	0.406973	1.06205	27.4538	29	464	peptide secretion	2.44747	0.755267
GO:0046903	0.40821	1.03056	97.5085	100	1648	secretion	0.669022	0.755267
GO:0048754	0.409121	1.11549	9.94018	11	168	branching morphogenesis of an epithelial tube	7.08156	0.755267
GO:0051260	0.409121	1.11549	9.94018	11	168	protein homooligomerization	7.08156	0.755267
GO:0007423	0.409429	1.05414	33.3706	35	564	sensory organ development	1.99924	0.755267
GO:0098662	0.409825	1.04774	41.2399	43	697	inorganic cation transmembrane transport	1.60827	0.755267
GO:0002009	0.410221	1.05117	36.329	38	614	morphogenesis of an epithelium	1.83148	0.755267
GO:0045453	0.410711	1.17904	5.14759	6	87	bone resorption	14.4035	0.755267
GO:0006813	0.411221	1.10099	11.8927	13	201	potassium ion transport	5.84664	0.755267
GO:0045778	0.411567	1.20576	4.20091	5	71	positive regulation of ossification	18.0222	0.755267
GO:0045652	0.411567	1.20576	4.20091	5	71	regulation of megakaryocyte differentiation	18.0222	0.755267
GO:1901568	0.411567	1.20576	4.20091	5	71	fatty acid derivative metabolic process	18.0222	0.755267
GO:0061028	0.411567	1.20576	4.20091	5	71	establishment of endothelial barrier	18.0222	0.755267
GO:0042129	0.411622	1.12113	8.9935	10	152	regulation of T cell proliferation	7.86444	0.755267
GO:0044344	0.411622	1.12113	8.9935	10	152	cellular response to fibroblast growth factor stimulus	7.86444	0.755267
GO:0062013	0.411622	1.12113	8.9935	10	152	positive regulation of small molecule metabolic process	7.86444	0.755267
GO:0055002	0.411622	1.12113	8.9935	10	152	striated muscle cell development	7.86444	0.755267
GO:0051403	0.413351	1.07677	17.7503	19	300	stress-activated MAPK cascade	3.83589	0.757862
GO:0048017	0.415975	1.08411	14.8511	16	251	inositol lipid-mediated signaling	4.61453	0.762093
GO:0033674	0.418748	1.04323	42.3641	44	716	positive regulation of kinase activity	1.55949	0.765427
GO:0035023	0.419094	1.14865	6.15345	7	104	regulation of Rho protein signal transduction	11.7594	0.765427
GO:1902882	0.419094	1.14865	6.15345	7	104	regulation of response to oxidative stress	11.7594	0.765427
GO:0055013	0.419094	1.14865	6.15345	7	104	cardiac muscle cell development	11.7594	0.765427
GO:2001235	0.419699	1.11321	9.05267	10	153	positive regulation of apoptotic signaling pathway	7.76197	0.765427
GO:0002224	0.419699	1.11321	9.05267	10	153	toll-like receptor signaling pathway	7.76197	0.765427
GO:0019233	0.421411	1.16458	5.20676	6	88	sensory perception of pain	14.078	0.767969
GO:0051402	0.422146	1.07344	16.8628	18	285	neuron apoptotic process	4.02659	0.768551
GO:0035725	0.422687	1.11923	8.10598	9	137	sodium ion transmembrane transport	8.71277	0.768551
GO:0048640	0.422687	1.11923	8.10598	9	137	negative regulation of developmental growth	8.71277	0.768551
GO:0060294	0.423433	1.18768	4.26008	5	72	cilium movement involved in cell motility	17.5251	0.769327
GO:0006508	0.423972	1.02535	102.834	105	1738	proteolysis	0.631604	0.769467
GO:0071805	0.424467	1.1013	10.0585	11	170	potassium ion transmembrane transport	6.91592	0.769467
GO:2001056	0.424467	1.1013	10.0585	11	170	positive regulation of cysteine-type endopeptidase activity	6.91592	0.769467
GO:0021761	0.425756	1.12686	7.1593	8	121	limbic system development	9.92828	0.771224
GO:0055007	0.427774	1.1054	9.11183	10	154	cardiac muscle cell differentiation	7.66149	0.774296
GO:0030010	0.428621	1.09157	11.0644	12	187	establishment of cell polarity	6.23524	0.775167
GO:0046916	0.428898	1.13685	6.21261	7	105	cellular transition metal ion homeostasis	11.5365	0.775167
GO:0021537	0.430632	1.06517	17.9278	19	303	telencephalon development	3.76031	0.777113
GO:0150063	0.430803	1.05569	22.8388	24	386	visual system development	2.92679	0.777113
GO:0010952	0.431984	1.07565	14.0228	15	237	positive regulation of peptidase activity	4.85232	0.777113
GO:0045669	0.432085	1.15047	5.26593	6	89	positive regulation of osteoblast differentiation	13.7634	0.777113
GO:0048704	0.432085	1.15047	5.26593	6	89	embryonic skeletal system morphogenesis	13.7634	0.777113
GO:0051961	0.432139	1.09434	10.1177	11	171	negative regulation of nervous system development	6.83527	0.777113
GO:0022008	0.432231	1.02239	108.987	111	1842	neurogenesis	0.594427	0.777113
GO:0050678	0.432731	1.05312	23.8446	25	403	regulation of epithelial cell proliferation	2.79695	0.777348
GO:1903532	0.433006	1.06142	18.9337	20	320	positive regulation of secretion by cell	3.54883	0.777348
GO:0045017	0.434	1.06531	16.9811	18	287	glycerolipid biosynthetic process	3.97067	0.778551
GO:0015749	0.434858	1.11689	7.21847	8	122	monosaccharide transmembrane transport	9.76619	0.779512
GO:0030104	0.435254	1.17013	4.31925	5	73	water homeostasis	17.0482	0.779641
GO:0045333	0.435945	1.08529	11.1235	12	188	cellular respiration	6.16908	0.780299
GO:0060147	0.438681	1.12528	6.27178	7	106	regulation of posttranscriptional gene silencing	11.3199	0.783451
GO:1905954	0.438681	1.12528	6.27178	7	106	positive regulation of lipid localization	11.3199	0.783451
GO:0048644	0.438681	1.12528	6.27178	7	106	muscle organ morphogenesis	11.3199	0.783451
GO:1903578	0.439763	1.10185	8.22432	9	139	regulation of ATP metabolic process	8.46385	0.784804
GO:0010033	0.440554	1.01521	201.762	204	3410	response to organic substance	0.318769	0.785633
GO:0071241	0.442308	1.07136	13.1352	14	222	cellular response to inorganic substance	5.16151	0.785864
GO:0090288	0.442726	1.13669	5.3251	6	90	negative regulation of cellular response to growth factor stimulus	13.4593	0.785864
GO:0050810	0.442726	1.13669	5.3251	6	90	regulation of steroid biosynthetic process	13.4593	0.785864
GO:0051262	0.442726	1.13669	5.3251	6	90	protein tetramerization	13.4593	0.785864
GO:0051179	0.443159	1.0122	399.441	402	6751	localization	0.160267	0.785864
GO:0042330	0.44317	1.03378	40.7666	42	689	taxis	1.60755	0.785864
GO:0042098	0.443264	1.07908	11.1827	12	189	T cell proliferation	6.10397	0.785864
GO:0002064	0.443612	1.06122	16.0936	17	272	epithelial cell development	4.17509	0.785864
GO:1903409	0.443943	1.1071	7.27763	8	123	reactive oxygen species biosynthetic process	9.60804	0.785864
GO:2000736	0.443943	1.1071	7.27763	8	123	regulation of stem cell differentiation	9.60804	0.785864
GO:1900076	0.44702	1.15309	4.37841	5	74	regulation of cellular response to insulin stimulus	16.5906	0.789185
GO:0021872	0.44702	1.15309	4.37841	5	74	forebrain generation of neurons	16.5906	0.789185
GO:2000116	0.447469	1.06115	15.1469	16	256	regulation of cysteine-type endopeptidase activity	4.43604	0.789185
GO:0060966	0.448438	1.11395	6.33095	7	107	regulation of gene silencing by RNA	11.1093	0.789185
GO:0090559	0.448438	1.11395	6.33095	7	107	regulation of membrane permeability	11.1093	0.789185
GO:0019915	0.448438	1.11395	6.33095	7	107	lipid storage	11.1093	0.789185
GO:0016525	0.448438	1.11395	6.33095	7	107	negative regulation of angiogenesis	11.1093	0.789185
GO:2000181	0.448438	1.11395	6.33095	7	107	negative regulation of blood vessel morphogenesis	11.1093	0.789185
GO:0007266	0.450576	1.07295	11.2419	12	190	Rho protein signal transduction	6.03989	0.79237
GO:0034219	0.453007	1.09748	7.3368	8	124	carbohydrate transmembrane transport	9.45369	0.793743
GO:1903510	0.453007	1.09748	7.3368	8	124	mucopolysaccharide metabolic process	9.45369	0.793743
GO:0034332	0.453327	1.12324	5.38427	6	91	adherens junction organization	13.1651	0.793743
GO:0034764	0.453332	1.06649	12.2477	13	207	positive regulation of transmembrane transport	5.51261	0.793743
GO:0034767	0.453332	1.06649	12.2477	13	207	positive regulation of ion transmembrane transport	5.51261	0.793743
GO:0010594	0.453332	1.06649	12.2477	13	207	regulation of endothelial cell migration	5.51261	0.793743
GO:0043542	0.455817	1.05281	16.212	17	274	endothelial cell migration	4.11436	0.797514
GO:0035821	0.456783	1.08501	8.34265	9	141	modulation of process of other organism	8.22544	0.798555
GO:0030155	0.457074	1.02521	47.9259	49	810	regulation of cell adhesion	1.357	0.798555
GO:1901343	0.458164	1.10285	6.39012	7	108	negative regulation of vasculature development	10.9045	0.799879
GO:0007422	0.458724	1.13654	4.43758	5	75	peripheral nervous system development	16.1511	0.800278
GO:0048880	0.461522	1.03803	23.1938	24	392	sensory system development	2.83788	0.803745
GO:0030182	0.461696	1.01589	91.7692	93	1551	neuron differentiation	0.702448	0.803745
GO:0007189	0.462045	1.08803	7.39597	8	125	adenylate cyclase-activating G protein-coupled receptor signaling pathway	9.30304	0.803745
GO:0051817	0.462045	1.08803	7.39597	8	125	modulation of process of other organism involved in symbiotic interaction	9.30304	0.803745
GO:0007399	0.463435	1.0118	152.594	154	2579	nervous system development	0.4207	0.804925
GO:0014909	0.46388	1.1101	5.44343	6	92	smooth muscle cell migration	12.8804	0.804925
GO:0009306	0.464059	1.03456	25.2055	26	426	protein secretion	2.60321	0.804925
GO:0035592	0.464059	1.03456	25.2055	26	426	establishment of protein localization to extracellular region	2.60321	0.804925
GO:0009746	0.464523	1.05158	14.3186	15	242	response to hexose	4.65388	0.805152
GO:0071417	0.467231	1.02314	42.1274	43	712	cellular response to organonitrogen compound	1.54122	0.809263
GO:0043255	0.467852	1.09196	6.44928	7	109	regulation of carbohydrate biosynthetic process	10.7053	0.809757
GO:0007219	0.469258	1.05085	13.3719	14	226	Notch signaling pathway	4.98042	0.811608
GO:0031529	0.470356	1.12046	4.49675	5	76	ruffle organization	15.7289	0.812341
GO:0003229	0.470356	1.12046	4.49675	5	76	ventricular cardiac muscle tissue development	15.7289	0.812341
GO:0007259	0.473717	1.06866	8.46099	9	143	receptor signaling pathway via JAK-STAT	7.99697	0.816939
GO:0043406	0.474085	1.04044	16.3895	17	277	positive regulation of MAP kinase activity	4.02573	0.816939
GO:0021954	0.47438	1.09727	5.5026	6	93	central nervous system neuron development	12.6049	0.816939
GO:0030219	0.47438	1.09727	5.5026	6	93	megakaryocyte differentiation	12.6049	0.816939
GO:0006650	0.474712	1.03272	21.3596	22	361	glycerophospholipid metabolic process	3.06735	0.816939
GO:0032091	0.477499	1.08128	6.50845	7	110	negative regulation of protein binding	10.5116	0.819979
GO:0010717	0.477499	1.08128	6.50845	7	110	regulation of epithelial to mesenchymal transition	10.5116	0.819979
GO:0014068	0.477499	1.08128	6.50845	7	110	positive regulation of phosphatidylinositol 3-kinase signaling	10.5116	0.819979
GO:0034249	0.477963	1.05434	10.4727	11	177	negative regulation of cellular amide metabolic process	6.37971	0.820192
GO:0030900	0.479689	1.02541	26.3888	27	446	forebrain development	2.46632	0.822568
GO:0042593	0.480158	1.03638	16.4486	17	278	glucose homeostasis	3.99682	0.822787
GO:1901699	0.48058	1.01675	45.3225	46	766	cellular response to nitrogen compound	1.42448	0.822925
GO:0006879	0.481908	1.10482	4.55592	5	77	cellular iron ion homeostasis	15.323	0.823445
GO:0010611	0.481908	1.10482	4.55592	5	77	regulation of cardiac muscle hypertrophy	15.323	0.823445
GO:0008344	0.481908	1.10482	4.55592	5	77	adult locomotory behavior	15.323	0.823445
GO:0051606	0.482673	1.04089	13.4902	14	228	detection of stimulus	4.89343	0.823584
GO:0001763	0.482673	1.04089	13.4902	14	228	morphogenesis of a branching structure	4.89343	0.823584
GO:0034284	0.483955	1.03765	14.4961	15	245	response to monosaccharide	4.54061	0.825188
GO:0071322	0.485542	1.04796	10.5319	11	178	cellular response to carbohydrate stimulus	6.30823	0.827235
GO:1905114	0.485842	1.01569	41.4174	42	700	cell surface receptor signaling pathway involved in cell-cell signaling	1.55743	0.827235
GO:0071383	0.487234	1.03016	17.5137	18	296	cellular response to steroid hormone stimulus	3.73288	0.829019
GO:2000377	0.488211	1.03933	12.5436	13	212	regulation of reactive oxygen species metabolic process	5.25565	0.829619
GO:0071692	0.488593	1.02142	25.5013	26	431	protein localization to extracellular region	2.54316	0.829619
GO:0009617	0.488693	1.01757	32.4831	33	549	response to bacterium	1.98941	0.829619
GO:0060968	0.488963	1.06061	7.57347	8	128	regulation of gene silencing	8.87207	0.829619
GO:0006812	0.490158	1.00982	65.4395	66	1106	cation transport	0.980367	0.831063
GO:0033500	0.492273	1.02836	16.567	17	280	carbohydrate homeostasis	3.93992	0.834063
GO:0051048	0.493096	1.04165	10.591	11	179	negative regulation of secretion	6.23795	0.834752
GO:1901264	0.493373	1.08961	4.61508	5	78	carbohydrate derivative transport	14.9326	0.834752
GO:0060828	0.493898	1.02465	18.5787	19	314	regulation of canonical Wnt signaling pathway	3.50146	0.834927
GO:0021953	0.494169	1.03752	11.5969	12	196	central nervous system neuron differentiation	5.67576	0.834927
GO:0009144	0.495196	1.07246	5.62094	6	95	purine nucleoside triphosphate metabolic process	12.0798	0.835492
GO:0007200	0.495196	1.07246	5.62094	6	95	phospholipase C-activating G protein-coupled receptor signaling pathway	12.0798	0.835492
GO:0043281	0.496027	1.03111	13.6086	14	230	regulation of cysteine-type endopeptidase activity involved in apoptotic process	4.8087	0.836308
GO:1901216	0.497856	1.05177	7.63264	8	129	positive regulation of neuron death	8.73505	0.838221
GO:0008593	0.497856	1.05177	7.63264	8	129	regulation of Notch signaling pathway	8.73505	0.838221
GO:0010647	0.49914	1.00445	111.59	112	1886	positive regulation of cell communication	0.572123	0.839555
GO:0001101	0.499808	1.03972	9.64434	10	163	response to acid chemical	6.8388	0.839555
GO:0050768	0.499808	1.03972	9.64434	10	163	negative regulation of neurogenesis	6.8388	0.839555
GO:0051050	0.500042	1.0073	57.6294	58	974	positive regulation of transport	1.11087	0.839555
GO:0006935	0.500923	1.00964	40.6482	41	687	chemotaxis	1.57843	0.840449
GO:1903131	0.501821	1.01632	22.6612	23	383	mononuclear cell differentiation	2.84895	0.840762
GO:0010721	0.502047	1.02884	12.6619	13	214	negative regulation of cell development	5.15787	0.840762
GO:0023061	0.502156	1.01095	33.6664	34	569	signal release	1.90814	0.840762
GO:0009142	0.504742	1.07481	4.67425	5	79	nucleoside triphosphate biosynthetic process	14.557	0.842752
GO:0043647	0.504742	1.07481	4.67425	5	79	inositol phosphate metabolic process	14.557	0.842752
GO:1905897	0.504742	1.07481	4.67425	5	79	regulation of response to endoplasmic reticulum stress	14.557	0.842752
GO:0032410	0.504742	1.07481	4.67425	5	79	negative regulation of transporter activity	14.557	0.842752
GO:0043266	0.5055	1.06047	5.6801	6	96	regulation of potassium ion transport	11.8294	0.843058
GO:0043010	0.505752	1.01641	19.7029	20	333	camera-type eye development	3.27715	0.843058
GO:0044238	0.505975	1.00171	589.666	590	9966	primary metabolic process	0.107936	0.843058
GO:0001738	0.507685	1.0329	9.70351	10	164	morphogenesis of a polarized epithelium	6.75565	0.845324
GO:0045664	0.508931	1.02368	12.7211	13	215	regulation of neuron differentiation	5.11001	0.84623
GO:0061138	0.508931	1.02368	12.7211	13	215	morphogenesis of a branching epithelium	5.11001	0.84623
GO:0051259	0.509306	1.0215	13.7269	14	232	protein complex oligomerization	4.72614	0.84627
GO:0031032	0.510013	1.01799	15.7386	16	266	actomyosin structure organization	4.10877	0.846277
GO:0032869	0.510013	1.01799	15.7386	16	266	cellular response to insulin stimulus	4.10877	0.846277
GO:0051347	0.510742	1.00452	47.8075	48	808	positive regulation of transferase activity	1.3359	0.846904
GO:0048667	0.513387	1.00399	43.8433	44	741	cell morphogenesis involved in neuron differentiation	1.45603	0.848635
GO:0097696	0.515493	1.02986	8.75683	9	148	receptor signaling pathway via STAT	7.46576	0.848635
GO:0021987	0.515493	1.02986	8.75683	9	148	cerebral cortex development	7.46576	0.848635
GO:0031623	0.515503	1.03452	7.75098	8	131	receptor internalization	8.47037	0.848635
GO:0014066	0.515527	1.02616	9.76268	10	165	regulation of phosphatidylinositol 3-kinase signaling	6.67401	0.848635
GO:0008037	0.515527	1.02616	9.76268	10	165	cell recognition	6.67401	0.848635
GO:1904659	0.515572	1.04057	6.74512	7	114	glucose transmembrane transport	9.78686	0.848635
GO:0046330	0.515727	1.04875	5.73927	6	97	positive regulation of JNK cascade	11.5868	0.848635
GO:0040014	0.51601	1.06041	4.73342	5	80	regulation of multicellular organism growth	14.1953	0.848635
GO:0006446	0.51601	1.06041	4.73342	5	80	regulation of translational initiation	14.1953	0.848635
GO:1903201	0.51601	1.06041	4.73342	5	80	regulation of oxidative stress-induced cell death	14.1953	0.848635
GO:1904063	0.51601	1.06041	4.73342	5	80	negative regulation of cation transmembrane transport	14.1953	0.848635
GO:0051704	0.516579	1.00147	57.9252	58	979	multi-organism process	1.09956	0.848993
GO:0009792	0.521072	1.00081	44.9675	45	760	embryo development ending in birth or egg hatching	1.4156	0.855793
GO:0031098	0.522328	1.00654	19.8804	20	336	stress-activated protein kinase signaling cascade	3.21889	0.857272
GO:0003158	0.523331	1.01952	9.82185	10	166	endothelium development	6.59385	0.858334
GO:0051046	0.524285	0.999912	41.0033	41	693	regulation of secretion	1.55122	0.859315
GO:0006024	0.524938	1.03086	6.80429	7	115	glycosaminoglycan biosynthetic process	9.61739	0.859801
GO:0030239	0.525872	1.03727	5.79844	6	98	myofibril assembly	11.3515	0.860531
GO:0045685	0.527169	1.04638	4.79259	5	81	regulation of glial cell differentiation	13.847	0.860531
GO:0001708	0.527169	1.04638	4.79259	5	81	cell fate specification	13.847	0.860531
GO:0017156	0.527169	1.04638	4.79259	5	81	calcium-ion regulated exocytosis	13.847	0.860531
GO:2000243	0.527169	1.04638	4.79259	5	81	positive regulation of reproductive process	13.847	0.860531
GO:0010950	0.529883	1.00972	11.8927	12	201	positive regulation of endopeptidase activity	5.3969	0.864377
GO:0022603	0.53072	0.996338	67.2146	67	1136	regulation of anatomical structure morphogenesis	0.94335	0.865156
GO:0061351	0.531094	1.01295	9.88101	10	167	neural precursor cell proliferation	6.51511	0.865181
GO:0043280	0.531914	1.01511	8.87516	9	150	positive regulation of cysteine-type endopeptidase activity involved in apoptotic process	7.268	0.865347
GO:0035194	0.531914	1.01511	8.87516	9	150	post-transcriptional gene silencing by RNA	7.268	0.865347
GO:0055076	0.532936	1.01783	7.86931	8	133	transition metal ion homeostasis	8.21754	0.866426
GO:0009791	0.534236	1.02134	6.86346	7	116	post-embryonic development	9.45229	0.866821
GO:0000902	0.534435	0.995102	74.3147	74	1256	cell morphogenesis	0.852329	0.866821
GO:0051172	0.535024	0.995273	142.535	142	2409	negative regulation of nitrogen compound metabolic process	0.4446	0.866821
GO:0060348	0.53506	1.00221	14.9694	15	253	bone development	4.25799	0.866821
GO:2000134	0.53593	1.02605	5.85761	6	99	negative regulation of G1/S transition of mitotic cell cycle	11.1234	0.866821
GO:0030029	0.536263	0.994569	57.2744	57	968	actin filament-based process	1.1053	0.866821
GO:0048167	0.536935	1.00434	11.9519	12	202	regulation of synaptic plasticity	5.34359	0.866821
GO:0021543	0.536935	1.00434	11.9519	12	202	pallium development	5.34359	0.866821
GO:0060562	0.538095	0.996567	22.0696	22	373	epithelial tube morphogenesis	2.87316	0.866821
GO:0071902	0.538095	0.996567	22.0696	22	373	positive regulation of protein serine/threonine kinase activity	2.87316	0.866821
GO:0043154	0.538213	1.03272	4.85176	5	82	negative regulation of cysteine-type endopeptidase activity involved in apoptotic process	13.5113	0.866821
GO:1901983	0.538213	1.03272	4.85176	5	82	regulation of protein acetylation	13.5113	0.866821
GO:0048008	0.538213	1.03272	4.85176	5	82	platelet-derived growth factor receptor signaling pathway	13.5113	0.866821
GO:0010660	0.538213	1.03272	4.85176	5	82	regulation of muscle cell apoptotic process	13.5113	0.866821
GO:0016441	0.54005	1.00789	8.93433	9	151	posttranscriptional gene silencing	7.17205	0.868619
GO:0008277	0.54005	1.00789	8.93433	9	151	regulation of G protein-coupled receptor signaling pathway	7.17205	0.868619
GO:0009749	0.542095	0.998248	14.0228	14	237	response to glucose	4.52883	0.870952
GO:1903706	0.542223	0.993644	25.1463	25	425	regulation of hemopoiesis	2.51488	0.870952
GO:0099175	0.543461	1.01198	6.92263	7	117	regulation of postsynapse organization	9.2914	0.87236
GO:0060560	0.545344	0.993694	18.1053	18	306	developmental growth involved in morphogenesis	3.49289	0.874522
GO:0015800	0.545896	1.01506	5.91678	6	100	acidic amino acid transport	10.902	0.874522
GO:0000079	0.545896	1.01506	5.91678	6	100	regulation of cyclin-dependent protein serine/threonine kinase activity	10.902	0.874522
GO:0071407	0.547585	0.990296	40.3524	40	682	cellular response to organic cyclic compound	1.56259	0.876102
GO:0070085	0.547609	0.993715	15.0878	15	255	glycosylation	4.19146	0.876102
GO:0010927	0.548132	1.00078	8.9935	9	152	cellular component assembly involved in morphogenesis	7.078	0.876358
GO:0006487	0.549137	1.01941	4.91092	5	83	protein N-linked glycosylation	13.1877	0.877225
GO:0009967	0.549835	0.990966	100.763	100	1703	positive regulation of signal transduction	0.626507	0.877225
GO:0045931	0.550131	1.00166	7.98765	8	135	positive regulation of mitotic cell cycle	7.97586	0.877225
GO:0010469	0.550131	1.00166	7.98765	8	135	regulation of signaling receptor activity	7.97586	0.877225
GO:0048666	0.551932	0.989734	77.6873	77	1313	neuron development	0.811552	0.879433
GO:0006023	0.552609	1.00279	6.98179	7	118	aminoglycan biosynthetic process	9.13459	0.879433
GO:0008645	0.552609	1.00279	6.98179	7	118	hexose transmembrane transport	9.13459	0.879433
GO:0070301	0.555766	1.00431	5.97594	6	101	cellular response to hydrogen peroxide	10.6872	0.883291
GO:0055072	0.555766	1.00431	5.97594	6	101	iron ion homeostasis	10.6872	0.883291
GO:0007254	0.556345	0.988905	13.1352	13	222	JNK cascade	4.79283	0.883628
GO:0023056	0.557732	0.989149	112.005	111	1893	positive regulation of signaling	0.562829	0.884731
GO:2000027	0.55787	0.988518	12.1294	12	205	regulation of animal organ morphogenesis	5.18834	0.884731
GO:0032870	0.55814	0.98614	44.5533	44	753	cellular response to hormone stimulus	1.41	0.884731
GO:0060997	0.559935	1.00643	4.97009	5	84	dendritic spine morphogenesis	12.8756	0.885828
GO:0048814	0.559935	1.00643	4.97009	5	84	regulation of dendrite morphogenesis	12.8756	0.885828
GO:0000288	0.559935	1.00643	4.97009	5	84	nuclear-transcribed mRNA catabolic process, deadenylation-dependent decay	12.8756	0.885828
GO:0032355	0.561691	0.987509	10.1177	10	171	response to estradiol	6.21388	0.888024
GO:0043687	0.563089	0.982695	23.3713	23	395	post-translational protein modification	2.67848	0.889651
GO:0046718	0.564128	0.986835	9.11183	9	154	viral entry into host cell	6.89534	0.890709
GO:0060964	0.565536	0.993778	6.03511	6	102	regulation of gene silencing by miRNA	10.4787	0.891182
GO:0043297	0.565536	0.993778	6.03511	6	102	apical junction assembly	10.4787	0.891182
GO:1902807	0.565536	0.993778	6.03511	6	102	negative regulation of cell cycle G1/S phase transition	10.4787	0.891182
GO:0006119	0.567061	0.985992	8.10598	8	137	oxidative phosphorylation	7.74469	0.892417
GO:0032368	0.567061	0.985992	8.10598	8	137	regulation of lipid transport	7.74469	0.892417
GO:0055001	0.569591	0.979394	13.2536	13	224	muscle cell development	4.70763	0.895814
GO:0002792	0.570602	0.993785	5.02926	5	85	negative regulation of peptide secretion	12.5744	0.896235
GO:0050764	0.570602	0.993785	5.02926	5	85	regulation of phagocytosis	12.5744	0.896235
GO:0042113	0.574143	0.976014	14.3186	14	242	B cell activation	4.34362	0.901211
GO:1901890	0.575202	0.983464	6.09428	6	103	positive regulation of cell junction assembly	10.2762	0.902285
GO:0001935	0.576684	0.975256	10.236	10	173	endothelial cell proliferation	6.07103	0.904022
GO:0003002	0.579228	0.973003	18.4603	18	312	regionalization	3.35984	0.906869
GO:0042542	0.579881	0.973272	9.23017	9	156	response to hydrogen peroxide	6.71967	0.906869
GO:0043270	0.581074	0.976739	42.8966	42	725	positive regulation of ion transport	1.45187	0.906869
GO:0002028	0.581133	0.981447	5.08843	5	86	regulation of sodium ion transport	12.2837	0.906869
GO:0009205	0.581133	0.981447	5.08843	5	86	purine ribonucleoside triphosphate metabolic process	12.2837	0.906869
GO:0035418	0.581133	0.981447	5.08843	5	86	protein localization to synapse	12.2837	0.906869
GO:0010657	0.581133	0.981447	5.08843	5	86	muscle cell apoptotic process	12.2837	0.906869
GO:0001701	0.582458	0.973429	28.6964	28	485	in utero embryonic development	2.16287	0.908348
GO:0050900	0.583406	0.972727	27.6905	27	468	leukocyte migration	2.23989	0.909238
GO:0010811	0.587661	0.966629	9.28934	9	157	positive regulation of cell-substrate adhesion	6.63435	0.914468
GO:0055067	0.587661	0.966629	9.28934	9	157	monovalent inorganic cation homeostasis	6.63435	0.914468
GO:0043009	0.587899	0.974168	44.0208	43	744	chordate embryonic development	1.41149	0.914468
GO:2001237	0.588367	0.967644	7.21847	7	122	negative regulation of extrinsic apoptotic signaling pathway	8.54542	0.914606
GO:2000117	0.591525	0.969411	5.14759	5	87	negative regulation of cysteine-type endopeptidase activity	12.0029	0.918921
GO:0045446	0.591911	0.963381	8.28349	8	140	endothelial cell differentiation	7.41633	0.91893
GO:0044270	0.59253	0.970726	36.9798	36	625	cellular nitrogen compound catabolic process	1.67455	0.919299
GO:0003006	0.593719	0.973556	53.251	52	900	developmental process involved in reproduction	1.16647	0.920122
GO:1904062	0.593954	0.964501	19.6437	19	332	regulation of cation transmembrane transport	3.13208	0.920122
GO:1904029	0.594206	0.963462	6.21261	6	105	regulation of cyclin-dependent protein kinase activity	9.88844	0.920122
GO:0009314	0.59702	0.965948	27.868	27	471	response to radiation	2.21145	0.923887
GO:0000904	0.599334	0.971867	55.381	54	936	cell morphogenesis involved in differentiation	1.11995	0.926227
GO:1902533	0.599781	0.972733	61.4753	60	1039	positive regulation of intracellular signal transduction	1.00989	0.926227
GO:0033135	0.600039	0.956071	8.34265	8	141	regulation of peptidyl-serine phosphorylation	7.3115	0.926227
GO:1902105	0.600069	0.959352	16.6261	16	281	regulation of leukocyte differentiation	3.68182	0.926227
GO:0042475	0.601772	0.957665	5.20676	5	88	odontogenesis of dentin-containing tooth	11.7317	0.927076
GO:0001885	0.601772	0.957665	5.20676	5	88	endothelial cell development	11.7317	0.927076
GO:0031341	0.601772	0.957665	5.20676	5	88	regulation of cell killing	11.7317	0.927076
GO:0035107	0.603015	0.953607	9.40767	9	159	appendage morphogenesis	6.46849	0.927805
GO:0035108	0.603015	0.953607	9.40767	9	159	limb morphogenesis	6.46849	0.927805
GO:0036473	0.603537	0.953761	6.27178	6	106	cell death in response to oxidative stress	9.70274	0.928016
GO:0034599	0.604599	0.958242	19.762	19	334	cellular response to oxidative stress	3.09468	0.929055
GO:0050671	0.605702	0.950971	7.3368	7	124	positive regulation of lymphocyte proliferation	8.27198	0.929566
GO:1903959	0.605702	0.950971	7.3368	7	124	regulation of anion transmembrane transport	8.27198	0.929566
GO:0002521	0.606547	0.962466	31.0631	30	525	leukocyte differentiation	1.97769	0.930263
GO:0031346	0.607396	0.960328	26.9805	26	456	positive regulation of cell projection organization	2.27195	0.930263
GO:0043149	0.608086	0.94887	8.40182	8	142	stress fiber assembly	7.20889	0.930263
GO:0015748	0.608086	0.94887	8.40182	8	142	organophosphate ester transport	7.20889	0.930263
GO:0030038	0.608086	0.94887	8.40182	8	142	contractile actin filament bundle assembly	7.20889	0.930263
GO:0006826	0.611873	0.946198	5.26593	5	89	iron ion transport	11.4695	0.933845
GO:0061180	0.611873	0.946198	5.26593	5	89	mammary gland epithelium development	11.4695	0.933845
GO:1903312	0.611873	0.946198	5.26593	5	89	negative regulation of mRNA metabolic process	11.4695	0.933845
GO:0042058	0.612751	0.944252	6.33095	6	107	regulation of epidermal growth factor receptor signaling pathway	9.52223	0.933845
GO:0051963	0.612751	0.944252	6.33095	6	107	regulation of synapse assembly	9.52223	0.933845
GO:0006942	0.612751	0.944252	6.33095	6	107	regulation of striated muscle contraction	9.52223	0.933845
GO:0032946	0.614225	0.942846	7.39597	7	125	positive regulation of mononuclear cell proliferation	8.14016	0.935401
GO:0048585	0.614548	0.973339	103.307	101	1746	negative regulation of response to stimulus	0.601988	0.935401
GO:0009101	0.615124	0.952062	19.8804	19	336	glycoprotein biosynthetic process	3.05795	0.935687
GO:0035195	0.616048	0.941775	8.46099	8	143	gene silencing by miRNA	7.10842	0.936502
GO:0055117	0.621823	0.935002	5.3251	5	90	regulation of cardiac muscle contraction	11.216	0.941751
GO:0002456	0.621823	0.935002	5.3251	5	90	T cell mediated immunity	11.216	0.941751
GO:0032922	0.621823	0.935002	5.3251	5	90	circadian regulation of gene expression	11.216	0.941751
GO:0045921	0.621845	0.93493	6.39012	6	108	positive regulation of exocytosis	9.34671	0.941751
GO:0061097	0.621845	0.93493	6.39012	6	108	regulation of protein tyrosine kinase activity	9.34671	0.941751
GO:0006493	0.621845	0.93493	6.39012	6	108	protein O-linked glycosylation	9.34671	0.941751
GO:0014902	0.622646	0.934858	7.45514	7	126	myotube differentiation	8.01146	0.942373
GO:0050806	0.625507	0.934713	9.58518	9	162	positive regulation of synaptic transmission	6.23114	0.946109
GO:0050801	0.626394	0.959077	45.6775	44	772	ion homeostasis	1.34145	0.946857
GO:0016055	0.6274	0.954141	34.4356	33	582	Wnt signaling pathway	1.7702	0.947783
GO:0042775	0.631619	0.924065	5.38427	5	91	mitochondrial ATP synthesis coupled electron transport	10.9709	0.952366
GO:0010827	0.631619	0.924065	5.38427	5	91	regulation of glucose transmembrane transport	10.9709	0.952366
GO:0055008	0.631619	0.924065	5.38427	5	91	cardiac muscle tissue morphogenesis	10.9709	0.952366
GO:2001257	0.632853	0.928579	9.64434	9	163	regulation of cation channel activity	6.15492	0.953631
GO:0030335	0.635106	0.952174	37.6307	36	636	positive regulation of cell migration	1.61712	0.955745
GO:0198738	0.635314	0.950541	34.554	33	584	cell-cell signaling by wnt	1.7581	0.955745
GO:0007411	0.635793	0.939932	20.117	19	340	axon guidance	2.98642	0.955745
GO:0071478	0.635842	0.929532	11.7744	11	199	cellular response to radiation	5.04709	0.955745
GO:0048863	0.637456	0.934275	15.9753	15	270	stem cell differentiation	3.73868	0.957306
GO:0045860	0.638881	0.950521	37.6899	36	637	positive regulation of protein kinase activity	1.61205	0.957306
GO:0048013	0.639181	0.919277	7.57347	7	128	ephrin receptor signaling pathway	7.76306	0.957306
GO:0010595	0.639181	0.919277	7.57347	7	128	positive regulation of endothelial cell migration	7.76306	0.957306
GO:0051101	0.639181	0.919277	7.57347	7	128	regulation of DNA binding	7.76306	0.957306
GO:0002573	0.639356	0.930148	13.9044	13	235	myeloid leukocyte differentiation	4.27723	0.957306
GO:2000379	0.63966	0.916823	6.50845	6	110	positive regulation of reactive oxygen species metabolic process	9.00992	0.957306
GO:0001666	0.640454	0.941102	24.3179	23	411	response to hypoxia	2.474	0.9579
GO:0042773	0.641259	0.91338	5.44343	5	92	ATP synthesis coupled electron transport	10.7337	0.95851
GO:0007409	0.643153	0.946967	34.6723	33	586	axonogenesis	1.74612	0.960744
GO:0035303	0.645405	0.925911	13.9636	13	236	regulation of dephosphorylation	4.24106	0.963097
GO:0051960	0.64579	0.94313	30.5897	29	517	regulation of nervous system development	1.97139	0.963097
GO:0097485	0.645926	0.93398	20.2354	19	342	neuron projection guidance	2.95159	0.963097
GO:0035305	0.64729	0.911679	7.63264	7	129	negative regulation of dephosphorylation	7.64317	0.963343
GO:0032231	0.64729	0.911679	7.63264	7	129	regulation of actin filament bundle assembly	7.64317	0.963343
GO:0070665	0.64729	0.911679	7.63264	7	129	positive regulation of leukocyte proliferation	7.64317	0.963343
GO:0009199	0.650741	0.902938	5.5026	5	93	ribonucleoside triphosphate metabolic process	10.5041	0.965821
GO:0014032	0.650741	0.902938	5.5026	5	93	neural crest cell development	10.5041	0.965821
GO:0008361	0.651401	0.921713	14.0228	13	237	regulation of cell size	4.20534	0.965821
GO:0036293	0.6518	0.935968	25.5013	24	431	response to decreased oxygen levels	2.34753	0.965821
GO:0031401	0.652487	0.956116	68.6346	66	1160	positive regulation of protein modification process	0.891216	0.965821
GO:0031344	0.652651	0.949007	47.1567	45	797	regulation of cell projection organization	1.28721	0.965821
GO:0120035	0.653804	0.9481	46.1508	44	780	regulation of plasma membrane bounded cell projection organization	1.31407	0.965821
GO:0098771	0.654059	0.946566	43.0741	41	728	inorganic ion homeostasis	1.40565	0.965821
GO:0018105	0.654095	0.927858	19.2887	18	326	peptidyl-serine phosphorylation	3.07746	0.965821
GO:0044237	0.6547	0.974311	612.919	608	10359	cellular metabolic process	0.102949	0.965821
GO:0060538	0.65474	0.912899	10.8869	10	184	skeletal muscle organ development	5.36685	0.965821
GO:0090175	0.655291	0.904204	7.69181	7	130	regulation of establishment of planar polarity	7.52604	0.965821
GO:1902414	0.655291	0.904204	7.69181	7	130	protein localization to cell junction	7.52604	0.965821
GO:0000041	0.655291	0.904204	7.69181	7	130	transition metal ion transport	7.52604	0.965821
GO:1904064	0.655291	0.904204	7.69181	7	130	positive regulation of cation transmembrane transport	7.52604	0.965821
GO:0018209	0.655918	0.928102	20.3537	19	344	peptidyl-serine modification	2.91737	0.965821
GO:0001818	0.656274	0.916267	13.0169	12	220	negative regulation of cytokine production	4.50496	0.965821
GO:0007389	0.656816	0.931201	23.4896	22	397	pattern specification process	2.53628	0.965821
GO:0042158	0.656966	0.899399	6.62679	6	112	lipoprotein biosynthetic process	8.69101	0.965821
GO:0043502	0.656966	0.899399	6.62679	6	112	regulation of muscle adaptation	8.69101	0.965821
GO:0030098	0.66086	0.925189	20.4129	19	345	lymphocyte differentiation	2.90048	0.970952
GO:0048706	0.663182	0.896849	7.75098	7	131	embryonic skeletal system development	7.41157	0.973771
GO:0048584	0.665403	0.96292	134.015	130	2265	positive regulation of response to stimulus	0.460428	0.976437
GO:0000910	0.668089	0.905134	12.0702	11	204	cytokinesis	4.80272	0.979782
GO:0002824	0.669221	0.88275	5.62094	5	95	positive regulation of adaptive immune response based on somatic recombination of immune receptors built from immunoglobulin superfamily domains	10.0665	0.980009
GO:0035282	0.669221	0.88275	5.62094	5	95	segmentation	10.0665	0.980009
GO:0050767	0.669463	0.926595	25.738	24	435	regulation of neurogenesis	2.30456	0.980009
GO:0110020	0.670962	0.889612	7.81014	7	132	regulation of actomyosin structure organization	7.2997	0.981012
GO:0008584	0.670962	0.889612	7.81014	7	132	male gonad development	7.2997	0.981012
GO:0010923	0.673749	0.88262	6.74512	6	114	negative regulation of phosphatase activity	8.38873	0.98449
GO:0060218	0.678217	0.872989	5.6801	5	96	hematopoietic stem cell differentiation	9.85786	0.988627
GO:0043462	0.678217	0.872989	5.6801	5	96	regulation of ATPase activity	9.85786	0.988627
GO:0120193	0.678217	0.872989	5.6801	5	96	tight junction organization	9.85786	0.988627
GO:0001906	0.67863	0.88249	7.86931	7	133	cell killing	7.19034	0.988627
GO:0046546	0.67863	0.88249	7.86931	7	133	development of primary male sexual characteristics	7.19034	0.988627
GO:0071456	0.680389	0.898727	13.2536	12	224	cellular response to hypoxia	4.3455	0.990224
GO:0036294	0.680548	0.901272	14.3186	13	242	cellular response to decreased oxygen levels	4.03337	0.990224
GO:0034766	0.68194	0.874462	6.80429	6	115	negative regulation of ion transmembrane transport	8.24348	0.991054
GO:0046849	0.68194	0.874462	6.80429	6	115	bone remodeling	8.24348	0.991054
GO:0060996	0.686185	0.875481	7.92848	7	134	dendritic spine development	7.08343	0.995127
GO:0031398	0.686185	0.875481	7.92848	7	134	positive regulation of protein ubiquitination	7.08343	0.995127
GO:0050729	0.686185	0.875481	7.92848	7	134	positive regulation of inflammatory response	7.08343	0.995127
GO:0048864	0.687048	0.86344	5.73927	5	97	stem cell development	9.65565	0.995127
GO:0014031	0.687048	0.86344	5.73927	5	97	mesenchymal cell development	9.65565	0.995127
GO:0032147	0.68722	0.912847	22.8388	21	386	activation of protein kinase activity	2.56094	0.995127
GO:0032989	0.687964	0.939792	58.1027	55	982	cellular component morphogenesis	1.03632	0.995607
GO:0044409	0.688694	0.88223	10.1177	9	171	entry into host	5.59249	0.996065
GO:0001824	0.689997	0.866452	6.86346	6	116	blastocyst development	8.10196	0.996551
GO:1901184	0.689997	0.866452	6.86346	6	116	regulation of ERBB signaling pathway	8.10196	0.996551
GO:0051345	0.690553	0.935403	50.9434	48	861	positive regulation of hydrolase activity	1.17649	0.996551
GO:0072175	0.690683	0.876214	9.05267	8	153	epithelial tube formation	6.20958	0.996551
GO:0043413	0.691805	0.893343	14.4369	13	244	macromolecule glycosylation	3.96752	0.996976
GO:0006486	0.691805	0.893343	14.4369	13	244	protein glycosylation	3.96752	0.996976
GO:0009100	0.69278	0.911233	23.9629	22	405	glycoprotein metabolic process	2.43707	0.997786
GO:0007006	0.695291	0.876756	10.1769	9	172	mitochondrial membrane organization	5.52765	1
GO:2000147	0.69674	0.924804	38.6365	36	653	positive regulation of cell motility	1.53402	1
GO:0046661	0.697618	0.870152	9.11183	8	154	male sex differentiation	6.1292	1
GO:0034763	0.697918	0.858586	6.92263	6	117	negative regulation of transmembrane transport	7.96406	1
GO:0014897	0.697918	0.858586	6.92263	6	117	striated muscle hypertrophy	7.96406	1
GO:0010648	0.698416	0.946124	89.1066	85	1506	negative regulation of cell communication	0.680964	1
GO:0035264	0.699926	0.877164	11.301	10	191	multicellular organism growth	4.98067	1
GO:0009628	0.70021	0.943076	79.9356	76	1351	response to abiotic stimulus	0.756585	1
GO:0043500	0.700951	0.861787	8.04681	7	136	muscle adaptation	6.87662	1
GO:0019953	0.701303	0.92515	41.8316	39	707	sexual reproduction	1.41769	1
GO:0031047	0.7018	0.871349	10.236	9	173	gene silencing by RNA	5.46393	1
GO:0007519	0.7018	0.871349	10.236	9	173	skeletal muscle tissue development	5.46393	1
GO:0023057	0.703102	0.94465	89.225	85	1508	negative regulation of signaling	0.679159	1
GO:0140353	0.704213	0.844951	5.85761	5	99	lipid export from cell	9.26946	1
GO:0006919	0.704213	0.844951	5.85761	5	99	activation of cysteine-type endopeptidase activity involved in apoptotic process	9.26946	1
GO:0007368	0.705702	0.850861	6.98179	6	118	determination of left/right symmetry	7.82965	1
GO:0051492	0.705702	0.850861	6.98179	6	118	regulation of stress fiber assembly	7.82965	1
GO:0010921	0.70607	0.872283	11.3602	10	192	regulation of phosphatase activity	4.92893	1
GO:0043200	0.70816	0.855098	8.10598	7	137	response to amino acid	6.7766	1
GO:0048858	0.708664	0.926904	49.2276	46	832	cell projection morphogenesis	1.20744	1
GO:0051480	0.712391	0.892307	19.9987	18	338	regulation of cytosolic calcium ion concentration	2.86282	1
GO:0014896	0.71335	0.843273	7.04096	6	119	muscle hypertrophy	7.69861	1
GO:2001236	0.714551	0.86073	10.3544	9	175	regulation of extrinsic apoptotic signaling pathway	5.33976	1
GO:0022407	0.715529	0.901736	26.3888	24	446	regulation of cell-cell adhesion	2.19228	1
GO:0071333	0.717818	0.852453	9.28934	8	157	cellular response to glucose stimulus	5.8972	1
GO:0009968	0.717847	0.937856	82.4207	78	1393	negative regulation of signal transduction	0.730377	1
GO:1902106	0.720711	0.827233	5.97594	5	101	negative regulation of leukocyte differentiation	8.90599	1
GO:0014033	0.720711	0.827233	5.97594	5	101	neural crest cell differentiation	8.90599	1
GO:0009141	0.72086	0.835817	7.10013	6	120	nucleoside triphosphate metabolic process	7.57083	1
GO:0006810	0.721777	0.960522	307.672	300	5200	transport	0.20159	1
GO:0002695	0.724348	0.846711	9.3485	8	158	negative regulation of leukocyte activation	5.82278	1
GO:0120032	0.725543	0.86556	13.7269	12	232	regulation of plasma membrane bounded cell projection assembly	4.05098	1
GO:0060326	0.72723	0.874836	16.9811	15	287	cell chemotaxis	3.30889	1
GO:0097529	0.727408	0.859943	12.6619	11	214	myeloid leukocyte migration	4.36435	1
GO:0070663	0.727408	0.859943	12.6619	11	214	regulation of leukocyte proliferation	4.36435	1
GO:0030099	0.728556	0.897796	28.6964	26	485	myeloid cell differentiation	2.00837	1
GO:1903707	0.728709	0.818648	6.03511	5	102	negative regulation of hemopoiesis	8.73222	1
GO:0001838	0.729088	0.835636	8.28349	7	140	embryonic epithelial tube formation	6.48929	1
GO:0046474	0.729308	0.866642	14.8511	13	251	glycerophospholipid biosynthetic process	3.74931	1
GO:0032990	0.730669	0.918444	50.7068	47	857	cell part morphogenesis	1.16276	1
GO:0002040	0.730776	0.841045	9.40767	8	159	sprouting angiogenesis	5.74977	1
GO:0006888	0.730889	0.861583	13.7861	12	233	endoplasmic reticulum to Golgi vesicle-mediated transport	4.01628	1
GO:0040017	0.733452	0.907884	39.2874	36	664	positive regulation of locomotion	1.48362	1
GO:0031647	0.734857	0.878268	20.2945	18	343	regulation of protein stability	2.77996	1
GO:0043112	0.735584	0.848663	11.656	10	197	receptor metabolic process	4.6819	1
GO:0051272	0.736655	0.906375	39.3466	36	665	positive regulation of cellular component movement	1.47916	1
GO:0071326	0.737102	0.835453	9.46684	8	160	cellular response to monosaccharide stimulus	5.67812	1
GO:0071331	0.737102	0.835453	9.46684	8	160	cellular response to hexose stimulus	5.67812	1
GO:0030218	0.737102	0.835453	9.46684	8	160	erythrocyte differentiation	5.67812	1
GO:0007154	0.737685	0.958567	358.616	350	6061	cell communication	0.173115	1
GO:0055065	0.7381	0.903504	37.2757	34	630	metal ion homeostasis	1.55651	1
GO:1903792	0.738401	0.851434	12.7802	11	216	negative regulation of anion transport	4.28391	1
GO:0090068	0.740514	0.86899	18.2237	16	308	positive regulation of cell cycle process	3.0646	1
GO:0007162	0.740514	0.86899	18.2237	16	308	negative regulation of cell adhesion	3.0646	1
GO:0031175	0.74157	0.924939	70.6463	66	1194	neuron projection development	0.841182	1
GO:0043269	0.743751	0.927956	79.9948	75	1352	regulation of ion transport	0.745526	1
GO:0002821	0.744207	0.801998	6.15345	5	104	positive regulation of adaptive immune response	8.39959	1
GO:0001678	0.74485	0.835271	10.6502	9	180	cellular glucose homeostasis	5.04722	1
GO:0060491	0.746517	0.849865	13.9636	12	236	regulation of cell projection assembly	3.91482	1
GO:0030177	0.746819	0.839565	11.7744	10	199	positive regulation of Wnt signaling pathway	4.58827	1
GO:0120039	0.748346	0.909375	48.9909	45	828	plasma membrane bounded cell projection morphogenesis	1.19263	1
GO:0010821	0.750637	0.830356	10.7094	9	181	regulation of mitochondrion organization	4.99161	1
GO:0022408	0.750637	0.830356	10.7094	9	181	negative regulation of cell-cell adhesion	4.99161	1
GO:0097306	0.751707	0.793923	6.21261	5	105	cellular response to alcohol	8.24036	1
GO:0090090	0.752314	0.835088	11.8336	10	200	negative regulation of canonical Wnt signaling pathway	4.5425	1
GO:0001736	0.755348	0.811011	8.52016	7	144	establishment of planar polarity	6.13378	1
GO:0007164	0.755348	0.811011	8.52016	7	144	establishment of tissue polarity	6.13378	1
GO:0016331	0.755464	0.819112	9.64434	8	163	morphogenesis of embryonic epithelium	5.47104	1
GO:0032092	0.759042	0.786007	6.27178	5	106	positive regulation of protein binding	8.08562	1
GO:0008654	0.759798	0.852466	17.3953	15	294	phospholipid biosynthetic process	3.1532	1
GO:0045619	0.761378	0.813804	9.70351	8	164	regulation of lymphocyte differentiation	5.40452	1
GO:0006836	0.761587	0.847328	16.3303	14	276	neurotransmitter transport	3.33937	1
GO:1903793	0.76159	0.88483	32.4239	29	548	positive regulation of anion transport	1.75466	1
GO:0046700	0.762976	0.889938	36.684	33	620	heterocycle catabolic process	1.55986	1
GO:0002221	0.763056	0.826273	11.9519	10	202	pattern recognition receptor signaling pathway	4.45299	1
GO:0050670	0.763056	0.826273	11.9519	10	202	regulation of lymphocyte proliferation	4.45299	1
GO:0070482	0.764829	0.873978	27.158	24	459	response to oxygen levels	2.06986	1
GO:0051098	0.765461	0.869218	25.028	22	423	regulation of binding	2.23407	1
GO:0015914	0.766213	0.778247	6.33095	5	107	phospholipid transport	7.93519	1
GO:0019886	0.766213	0.778247	6.33095	5	107	antigen processing and presentation of exogenous peptide antigen via MHC class II	7.93519	1
GO:0080135	0.767467	0.897085	45.2042	41	764	regulation of cellular response to stress	1.2763	1
GO:0051208	0.767774	0.79923	8.63849	7	146	sequestering of calcium ion	5.96688	1
GO:0034341	0.768304	0.821934	12.0111	10	203	response to interferon-gamma	4.40923	1
GO:0031324	0.768398	0.937833	154.605	147	2613	negative regulation of cellular metabolic process	0.391195	1
GO:0009855	0.769577	0.78708	7.5143	6	127	determination of bilateral symmetry	6.75925	1
GO:0050821	0.769591	0.826875	13.1352	11	222	protein stabilization	4.05547	1
GO:0051234	0.770593	0.950173	314.832	305	5321	establishment of localization	0.195735	1
GO:0051049	0.771214	0.927289	107.567	101	1818	regulation of transport	0.55525	1
GO:0032504	0.771874	0.892866	43.1925	39	730	multicellular organism reproduction	1.32976	1
GO:0002495	0.773222	0.770638	6.39012	5	108	antigen processing and presentation of peptide antigen via MHC class II	7.78892	1
GO:0032411	0.773222	0.770638	6.39012	5	108	positive regulation of transporter activity	7.78892	1
GO:2001233	0.773435	0.861899	24.0813	21	407	regulation of apoptotic signaling pathway	2.30349	1
GO:0006473	0.774527	0.822916	13.1944	11	223	protein acetylation	4.01918	1
GO:0060071	0.77599	0.780574	7.57347	6	128	Wnt signaling pathway, planar cell polarity pathway	6.65405	1
GO:0051250	0.77599	0.780574	7.57347	6	128	negative regulation of lymphocyte activation	6.65405	1
GO:0010810	0.779421	0.834352	16.567	14	280	regulation of cell-substrate adhesion	3.24464	1
GO:0001936	0.779733	0.787784	8.75683	7	148	regulation of endothelial cell proliferation	5.8067	1
GO:0055080	0.779814	0.887845	42.3049	38	715	cation homeostasis	1.3506	1
GO:0071310	0.780203	0.936032	165.256	157	2793	cellular response to organic substance	0.36569	1
GO:0043393	0.780585	0.823706	14.3778	12	243	regulation of protein binding	3.69253	1
GO:0006979	0.781779	0.866187	28.5189	25	482	response to oxidative stress	1.95524	1
GO:0071453	0.782054	0.827717	15.502	13	262	cellular response to oxygen levels	3.44109	1
GO:0009799	0.782268	0.774174	7.63264	6	129	specification of symmetry	6.55129	1
GO:0007283	0.783498	0.858208	25.3238	22	428	spermatogenesis	2.18218	1
GO:0051051	0.783498	0.858208	25.3238	22	428	negative regulation of transport	2.18218	1
GO:0050870	0.783555	0.809184	12.1886	10	206	positive regulation of T cell activation	4.28174	1
GO:0060284	0.78396	0.876016	34.9681	31	591	regulation of cell development	1.61266	1
GO:1903530	0.784286	0.880371	38.1632	34	645	regulation of secretion by cell	1.48496	1
GO:1901653	0.786232	0.858996	26.448	23	447	cellular response to peptide	2.09155	1
GO:0002504	0.786754	0.755854	6.50845	5	110	antigen processing and presentation of peptide or polysaccharide antigen via MHC class II	7.50826	1
GO:1990542	0.786754	0.755854	6.50845	5	110	mitochondrial transmembrane transport	7.50826	1
GO:0007166	0.78779	0.935602	177.799	169	3005	cell surface receptor signaling pathway	0.340058	1
GO:0007156	0.788412	0.767878	7.69181	6	130	homophilic cell adhesion via plasma membrane adhesion molecules	6.45089	1
GO:0032944	0.788475	0.80502	12.2477	10	207	regulation of mononuclear cell proliferation	4.24047	1
GO:0051494	0.788592	0.797494	11.1235	9	188	negative regulation of cytoskeleton organization	4.62681	1
GO:0046578	0.788888	0.811263	13.3719	11	226	regulation of Ras protein signal transduction	3.91319	1
GO:0061013	0.788888	0.811263	13.3719	11	226	regulation of mRNA catabolic process	3.91319	1
GO:0000187	0.789421	0.788255	9.99935	8	169	activation of MAPK activity	5.08946	1
GO:0043547	0.789628	0.856914	26.5072	23	448	positive regulation of GTPase activity	2.08222	1
GO:0048812	0.789973	0.888519	47.8075	43	808	neuron projection morphogenesis	1.19674	1
GO:0031589	0.790444	0.85388	25.4421	22	430	cell-substrate adhesion	2.16193	1
GO:0051716	0.790522	0.948097	411.275	400	6951	cellular response to stimulus	0.150425	1
GO:2001234	0.790819	0.821006	15.6203	13	264	negative regulation of apoptotic signaling pathway	3.38915	1
GO:0016358	0.791487	0.833981	18.9337	16	320	dendrite development	2.83906	1
GO:0001505	0.792175	0.824872	16.7445	14	283	regulation of neurotransmitter levels	3.17622	1
GO:0032102	0.792545	0.846963	23.3121	20	394	negative regulation of response to external stimulus	2.34095	1
GO:0052126	0.793314	0.800898	12.3069	10	208	movement in host environment	4.1998	1
GO:0035148	0.794725	0.783335	10.0585	8	170	tube formation	5.02976	1
GO:0072659	0.795408	0.838631	21.1821	18	358	protein localization to plasma membrane	2.55189	1
GO:0070661	0.796308	0.821759	16.8036	14	284	leukocyte proliferation	3.15389	1
GO:1904375	0.796805	0.77121	8.93433	7	151	regulation of protein localization to cell periphery	5.57826	1
GO:0034612	0.797705	0.825303	17.9278	15	303	response to tumor necrosis factor	2.96866	1
GO:0097061	0.799651	0.741622	6.62679	5	112	dendritic spine organization	7.24251	1
GO:0007015	0.799993	0.859679	31.0039	27	524	actin filament organization	1.78672	1
GO:0009058	0.800277	0.944768	359.562	348	6077	biosynthetic process	0.17122	1
GO:0045807	0.800302	0.755584	7.81014	6	132	positive regulation of endocytosis	6.25689	1
GO:0032874	0.800302	0.755584	7.81014	6	132	positive regulation of stress-activated MAPK cascade	6.25689	1
GO:0007173	0.802268	0.765838	8.9935	7	152	epidermal growth factor receptor signaling pathway	5.50511	1
GO:1901888	0.802862	0.805972	14.6736	12	248	regulation of cell junction assembly	3.54514	1
GO:0097191	0.803493	0.811138	15.7978	13	267	extrinsic apoptotic signaling pathway	3.31341	1
GO:0021915	0.803502	0.784184	11.301	9	191	neural tube development	4.48261	1
GO:0003300	0.805865	0.734704	6.68596	5	113	cardiac muscle hypertrophy	7.11489	1
GO:0051341	0.805865	0.734704	6.68596	5	113	regulation of oxidoreductase activity	7.11489	1
GO:0043620	0.80605	0.749582	7.86931	6	133	regulation of DNA-templated transcription in response to stress	6.16315	1
GO:0030178	0.806997	0.796222	13.6086	11	230	negative regulation of Wnt signaling pathway	3.77826	1
GO:0032943	0.807592	0.8079	15.857	13	268	mononuclear cell proliferation	3.28873	1
GO:0061387	0.807618	0.760539	9.05267	7	153	regulation of extent of cell growth	5.43338	1
GO:0034101	0.810038	0.768931	10.236	8	173	erythrocyte homeostasis	4.85683	1
GO:0050865	0.810767	0.857384	33.3706	29	564	regulation of cell activation	1.65651	1
GO:0048523	0.810928	0.939737	298.62	287	5047	negative regulation of cellular process	0.204725	1
GO:0023052	0.811636	0.941948	357.137	345	6036	signaling	0.172058	1
GO:0070304	0.811669	0.743674	7.92848	6	134	positive regulation of stress-activated protein kinase signaling cascade	6.07151	1
GO:0019722	0.81186	0.784818	12.5436	10	212	calcium-mediated signaling	4.04281	1
GO:0006873	0.811924	0.865569	38.7549	34	655	cellular ion homeostasis	1.43996	1
GO:0098876	0.811926	0.727913	6.74512	5	114	vesicle-mediated transport to the plasma membrane	6.99061	1
GO:0090263	0.812856	0.755313	9.11183	7	154	positive regulation of canonical Wnt signaling pathway	5.36305	1
GO:0009266	0.815414	0.795687	14.8511	12	251	response to temperature stimulus	3.4609	1
GO:0034446	0.817159	0.737858	7.98765	6	135	substrate adhesion-dependent cell spreading	5.98189	1
GO:0010976	0.817613	0.771305	11.4785	9	194	positive regulation of neuron projection development	4.34504	1
GO:0045787	0.818088	0.833047	24.8505	21	420	positive regulation of cell cycle	2.1631	1
GO:0071375	0.818146	0.826377	22.6612	19	383	cellular response to peptide hormone stimulus	2.35348	1
GO:0048534	0.821719	0.883117	59.1678	53	1000	hematopoietic or lymphoid organ development	0.96301	1
GO:0045930	0.822316	0.815705	20.5312	17	347	negative regulation of mitotic cell cycle	2.56534	1
GO:0042752	0.822523	0.732131	8.04681	6	136	regulation of circadian rhythm	5.89425	1
GO:0080134	0.822765	0.899085	84.3732	77	1426	regulation of response to stress	0.688029	1
GO:0034248	0.823354	0.838174	28.223	24	477	regulation of cellular amide metabolic process	1.91659	1
GO:0000082	0.823363	0.795199	16.0936	13	272	G1/S transition of mitotic cell cycle	3.19272	1
GO:0009755	0.823446	0.788973	14.9694	12	253	hormone-mediated signaling pathway	3.4064	1
GO:1990778	0.82436	0.828775	24.9688	21	422	protein localization to cell periphery	2.14264	1
GO:0071222	0.824467	0.755042	10.4135	8	176	cellular response to lipopolysaccharide	4.69267	1
GO:0043087	0.82529	0.846581	32.6014	28	551	regulation of GTPase activity	1.67575	1
GO:0032970	0.826271	0.836269	28.2822	24	478	regulation of actin filament-based process	1.90858	1
GO:0048813	0.826583	0.762949	11.5969	9	196	dendrite morphogenesis	4.25682	1
GO:0018394	0.826583	0.762949	11.5969	9	196	peptidyl-lysine acetylation	4.25682	1
GO:0010628	0.828554	0.881626	61.4753	55	1039	positive regulation of gene expression	0.925735	1
GO:0048232	0.828911	0.828775	26.1521	22	442	male gamete generation	2.04613	1
GO:0050679	0.829133	0.769364	12.7802	10	216	positive regulation of epithelial cell proliferation	3.89446	1
GO:0055082	0.830582	0.868126	48.8134	43	825	cellular chemical homeostasis	1.14793	1
GO:0010975	0.830678	0.843235	32.7198	28	553	regulation of neuron projection development	1.66365	1
GO:0050807	0.831215	0.78237	15.0878	12	255	regulation of synapse organization	3.35317	1
GO:0007098	0.832875	0.720937	8.16515	6	138	centrosome cycle	5.72464	1
GO:0007044	0.832875	0.720937	8.16515	6	138	cell-substrate junction assembly	5.72464	1
GO:0008406	0.833256	0.765593	12.8394	10	217	gonad development	3.85865	1
GO:0002683	0.834182	0.814891	22.9571	19	388	negative regulation of immune system process	2.29322	1
GO:0019827	0.835211	0.75477	11.7152	9	198	stem cell population maintenance	4.17126	1
GO:0050921	0.837866	0.715467	8.22432	6	139	positive regulation of chemotaxis	5.64257	1
GO:0030100	0.839726	0.76773	14.0819	11	238	regulation of endocytosis	3.52853	1
GO:0043279	0.839989	0.695745	7.04096	5	119	response to alkaloid	6.41551	1
GO:0060048	0.841993	0.725389	9.46684	7	160	cardiac muscle contraction	4.96836	1
GO:0038127	0.842366	0.737276	10.6502	8	180	ERBB signaling pathway	4.48642	1
GO:2001242	0.842366	0.737276	10.6502	8	180	regulation of intrinsic apoptotic signaling pathway	4.48642	1
GO:0046651	0.842379	0.772666	15.2653	12	258	lymphocyte proliferation	3.27564	1
GO:0043488	0.843501	0.746762	11.8336	9	200	regulation of mRNA stability	4.08825	1
GO:0048609	0.844966	0.851606	42.7783	37	723	multicellular organismal reproductive process	1.28612	1
GO:0009581	0.845168	0.689647	7.10013	5	120	detection of external stimulus	6.30903	1
GO:0051222	0.845594	0.802343	22.0696	18	373	positive regulation of protein transport	2.35077	1
GO:0006811	0.845869	0.923181	217.205	205	3671	ion transport	0.276401	1
GO:0071674	0.846608	0.732963	10.7094	8	181	mononuclear cell migration	4.43698	1
GO:0098727	0.847522	0.74282	11.8927	9	201	maintenance of cell number	4.04767	1
GO:0032956	0.847884	0.812102	25.4421	21	430	regulation of actin cytoskeleton organization	2.06366	1
GO:0043543	0.848613	0.773891	16.5078	13	279	protein acylation	3.03452	1
GO:0055074	0.848845	0.814783	26.5663	22	449	calcium ion homeostasis	1.98283	1
GO:0030097	0.849241	0.866343	56.801	50	960	hemopoiesis	0.985786	1
GO:0051928	0.850209	0.683654	7.1593	5	121	positive regulation of calcium ion transport	6.20518	1
GO:0031929	0.850209	0.683654	7.1593	5	121	TOR signaling	6.20518	1
GO:0048259	0.850209	0.683654	7.1593	5	121	regulation of receptor-mediated endocytosis	6.20518	1
GO:1903531	0.85086	0.715929	9.58518	7	162	negative regulation of secretion by cell	4.84644	1
GO:0043271	0.851064	0.783616	18.8153	15	318	negative regulation of ion transport	2.69521	1
GO:0090087	0.854695	0.842317	40.8849	35	691	regulation of peptide transport	1.33189	1
GO:0009582	0.855112	0.677764	7.21847	5	122	detection of abiotic stimulus	6.10387	1
GO:1903322	0.855141	0.71129	9.64434	7	163	positive regulation of protein modification by small protein conjugation or removal	4.78716	1
GO:0071356	0.855293	0.768008	16.6261	13	281	cellular response to tumor necrosis factor	2.99148	1
GO:0006954	0.85685	0.840974	40.9441	35	692	inflammatory response	1.32804	1
GO:0071219	0.858791	0.720318	10.8869	8	184	cellular response to molecule of bacterial origin	4.29348	1
GO:0002262	0.859096	0.731239	12.0702	9	204	myeloid cell homeostasis	3.9295	1
GO:0106027	0.859881	0.671973	7.27763	5	123	neuron projection organization	6.00502	1
GO:1903076	0.859881	0.671973	7.27763	5	123	regulation of protein localization to plasma membrane	6.00502	1
GO:0030004	0.859881	0.671973	7.27763	5	123	cellular monovalent inorganic cation homeostasis	6.00502	1
GO:1903039	0.86	0.740187	13.2536	10	224	positive regulation of leukocyte cell-cell adhesion	3.62125	1
GO:0043085	0.860235	0.888204	96.2068	87	1626	positive regulation of catalytic activity	0.597906	1
GO:1902904	0.862674	0.716199	10.946	8	185	negative regulation of supramolecular fiber organization	4.24719	1
GO:0097581	0.864518	0.66628	7.3368	5	124	lamellipodium organization	5.90856	1
GO:0072507	0.865182	0.806018	28.0455	23	474	divalent inorganic cation homeostasis	1.86006	1
GO:0042157	0.865336	0.684297	8.57932	6	145	lipoprotein metabolic process	5.18526	1
GO:0045137	0.866982	0.73323	13.3719	10	226	development of primary sexual characteristics	3.55744	1
GO:0044070	0.867789	0.853745	55.2627	48	934	regulation of anion transport	0.999775	1
GO:0006874	0.868971	0.796069	25.9155	21	438	cellular calcium ion homeostasis	1.98896	1
GO:0048583	0.869008	0.918456	243.002	229	4107	regulation of response to stimulus	0.246684	1
GO:0001841	0.869026	0.660681	7.39597	5	125	neural tube formation	5.8144	1
GO:0050803	0.869373	0.747909	15.7386	12	266	regulation of synapse structure or activity	3.08158	1
GO:0031023	0.869517	0.679362	8.63849	6	146	microtubule organizing center organization	5.11447	1
GO:1900180	0.869517	0.679362	8.63849	6	146	regulation of protein localization to nucleus	5.11447	1
GO:0044843	0.872796	0.758669	18.1053	14	306	cell cycle G1/S phase transition	2.71669	1
GO:1903037	0.872796	0.758669	18.1053	14	306	regulation of leukocyte cell-cell adhesion	2.71669	1
GO:0043487	0.873424	0.71634	12.3069	9	208	regulation of RNA stability	3.77982	1
GO:0150115	0.87359	0.674496	8.69766	6	147	cell-substrate junction organization	5.04512	1
GO:0007160	0.875514	0.741961	15.857	12	268	cell-matrix adhesion	3.03575	1
GO:0010646	0.876848	0.912382	215.903	202	3649	regulation of cell communication	0.27565	1
GO:0043618	0.877661	0.64976	7.5143	5	127	regulation of transcription from RNA polymerase II promoter in response to stress	5.63271	1
GO:0010769	0.877661	0.64976	7.5143	5	127	regulation of cell morphogenesis involved in differentiation	5.63271	1
GO:0007276	0.878095	0.811126	33.9031	28	573	gamete generation	1.54954	1
GO:0043066	0.878349	0.846171	54.5527	47	922	negative regulation of apoptotic process	1.00459	1
GO:1902532	0.87893	0.813106	35.0273	29	592	negative regulation of intracellular signal transduction	1.50352	1
GO:0071216	0.880131	0.709113	12.4252	9	210	cellular response to biotic stimulus	3.70816	1
GO:0006475	0.880811	0.696279	11.2419	8	190	internal protein amino acid acetylation	4.02659	1
GO:0007010	0.883349	0.874956	93.0117	83	1572	cytoskeleton organization	0.610278	1
GO:0006875	0.883563	0.804248	32.9564	27	557	cellular metal ion homeostasis	1.58128	1
GO:0023051	0.883787	0.910111	218.388	204	3691	regulation of signaling	0.27208	1
GO:0035567	0.885899	0.676215	10.1177	7	171	non-canonical Wnt signaling pathway	4.34971	1
GO:0007548	0.887103	0.730341	16.0936	12	272	sex differentiation	2.94712	1
GO:0030048	0.887491	0.688615	11.3602	8	192	actin filament-based movement	3.94314	1
GO:0006417	0.887949	0.771898	24.1404	19	408	regulation of translation	2.0739	1
GO:1904951	0.888281	0.766871	23.0163	18	389	positive regulation of establishment of protein localization	2.16137	1
GO:0030595	0.889644	0.698538	12.6027	9	213	leukocyte chemotaxis	3.60444	1
GO:0050772	0.889703	0.634033	7.69181	5	130	positive regulation of axonogenesis	5.37574	1
GO:0070507	0.890712	0.684844	11.4194	8	193	regulation of microtubule cytoskeleton organization	3.90239	1
GO:1901576	0.891014	0.918972	355.066	338	6001	organic substance biosynthetic process	0.170539	1
GO:0030003	0.892064	0.808234	37.6307	31	636	cellular cation homeostasis	1.39252	1
GO:0051224	0.893484	0.628957	7.75098	5	131	negative regulation of protein transport	5.29398	1
GO:0097435	0.898161	0.825722	49.8784	42	843	supramolecular fiber organization	1.07386	1
GO:0051028	0.899213	0.642281	9.11183	6	154	mRNA transport	4.5969	1
GO:0051223	0.899747	0.804671	38.9915	32	659	regulation of protein transport	1.33886	1
GO:0060401	0.899917	0.673775	11.5969	8	196	cytosolic calcium ion transport	3.78384	1
GO:0032270	0.90017	0.865313	92.775	82	1568	positive regulation of cellular protein metabolic process	0.606006	1
GO:0045785	0.902166	0.771872	27.9272	22	472	positive regulation of cell adhesion	1.79429	1
GO:0007030	0.902484	0.637925	9.171	6	155	Golgi organization	4.53777	1
GO:0051099	0.902837	0.670163	11.656	8	197	positive regulation of binding	3.74552	1
GO:1902115	0.904106	0.681587	12.8986	9	218	regulation of organelle assembly	3.441	1
GO:0007269	0.904106	0.681587	12.8986	9	218	neurotransmitter secretion	3.441	1
GO:0099643	0.904106	0.681587	12.8986	9	218	signal release from synapse	3.441	1
GO:0019079	0.904162	0.614202	7.92848	5	134	viral genome replication	5.05959	1
GO:0072503	0.904313	0.76578	26.8622	21	454	cellular divalent inorganic cation homeostasis	1.85124	1
GO:1903169	0.905663	0.633628	9.23017	6	156	regulation of calcium ion transmembrane transport	4.47978	1
GO:0050863	0.906043	0.725666	18.8745	14	319	regulation of T cell activation	2.49978	1
GO:0043069	0.907154	0.82703	55.6769	47	941	negative regulation of programmed cell death	0.964436	1
GO:1904950	0.907509	0.609435	7.98765	5	135	negative regulation of establishment of protein localization	4.98491	1
GO:0002244	0.908461	0.663052	11.7744	8	199	hematopoietic progenitor cell differentiation	3.67061	1
GO:2000241	0.908753	0.629388	9.28934	6	157	regulation of reproductive process	4.4229	1
GO:0051701	0.91021	0.695973	15.4428	11	261	biological process involved in interaction with host	2.93404	1
GO:0045580	0.910752	0.60474	8.04681	5	136	regulation of T cell differentiation	4.91187	1
GO:0006941	0.911167	0.659553	11.8336	8	200	striated muscle contraction	3.634	1
GO:0002520	0.911352	0.83214	62.3628	53	1054	immune system development	0.866861	1
GO:0010942	0.912474	0.801279	42.7783	35	723	positive regulation of cell death	1.2166	1
GO:0016458	0.913275	0.681897	14.3186	10	242	gene silencing	3.10259	1
GO:0016573	0.913768	0.640633	10.6502	7	180	histone acetylation	3.92562	1
GO:0046822	0.913896	0.600117	8.10598	5	137	regulation of nucleocytoplasmic transport	4.84043	1
GO:0030516	0.913896	0.600117	8.10598	5	137	regulation of axon extension	4.84043	1
GO:0019725	0.914944	0.825557	59.2861	50	1002	cellular homeostasis	0.904877	1
GO:0007265	0.915005	0.759669	28.3414	22	479	Ras protein signal transduction	1.74223	1
GO:0010608	0.915597	0.791466	39.5832	32	669	posttranscriptional regulation of gene expression	1.29913	1
GO:0048872	0.916599	0.706161	17.987	13	304	homeostasis of number of cells	2.55594	1
GO:0022409	0.916702	0.69753	16.8036	12	284	positive regulation of cell-cell adhesion	2.70333	1
GO:0002822	0.916942	0.595563	8.16515	5	138	regulation of adaptive immune response based on somatic recombination of immune receptors built from immunoglobulin superfamily domains	4.77053	1
GO:1901990	0.917146	0.753221	27.2763	21	461	regulation of mitotic cell cycle phase transition	1.79545	1
GO:0048002	0.918881	0.649269	12.0111	8	203	antigen processing and presentation of peptide antigen	3.52738	1
GO:0040029	0.919099	0.633223	10.7685	7	182	regulation of gene expression, epigenetic	3.83981	1
GO:0046660	0.919892	0.591078	8.22432	5	139	female sex differentiation	4.70214	1
GO:0006820	0.920054	0.886064	176.675	161	2986	anion transport	0.328096	1
GO:0006839	0.920715	0.701242	18.1053	13	306	mitochondrial transport	2.52264	1
GO:0031396	0.921649	0.659175	13.3127	9	225	regulation of protein ubiquitination	3.23022	1
GO:0070252	0.92275	0.586658	8.28349	5	140	actin-mediated cell contraction	4.6352	1
GO:0048588	0.92299	0.689775	16.9811	12	287	developmental cell growth	2.64711	1
GO:0031331	0.924462	0.740835	26.3888	20	446	positive regulation of cellular catabolic process	1.8269	1
GO:0009416	0.924589	0.704419	19.407	14	328	response to light stimulus	2.36448	1
GO:0051282	0.925517	0.582304	8.34265	5	141	regulation of sequestering of calcium ion	4.56969	1
GO:0051283	0.925517	0.582304	8.34265	5	141	negative regulation of sequestering of calcium ion	4.56969	1
GO:0051209	0.925517	0.582304	8.34265	5	141	release of sequestered calcium ion into cytosol	4.56969	1
GO:0071702	0.925772	0.881167	169.871	154	2871	organic substance transport	0.339476	1
GO:0018393	0.926559	0.62242	10.946	7	185	internal peptidyl-lysine acetylation	3.71629	1
GO:1901991	0.926723	0.664426	14.6736	10	248	negative regulation of mitotic cell cycle phase transition	2.95428	1
GO:0006352	0.926955	0.684698	17.0995	12	289	DNA-templated transcription, initiation	2.6106	1
GO:0022412	0.926955	0.684698	17.0995	12	289	cellular process involved in reproduction in multicellular organism	2.6106	1
GO:0032886	0.927669	0.674013	15.9161	11	269	regulation of microtubule-based process	2.76212	1
GO:0051962	0.928263	0.699862	19.5254	14	330	positive regulation of nervous system development	2.3359	1
GO:0006367	0.928283	0.650008	13.4902	9	228	transcription initiation from RNA polymerase II promoter	3.14578	1
GO:0050920	0.928283	0.650008	13.4902	9	228	regulation of chemotaxis	3.14578	1
GO:0051247	0.928533	0.849589	97.6268	85	1650	positive regulation of protein metabolic process	0.567291	1
GO:0071346	0.928909	0.618899	11.0052	7	186	cellular response to interferon-gamma	3.67644	1
GO:0001775	0.930542	0.841411	88.1599	76	1490	cell activation	0.622008	1
GO:1902531	0.931095	0.857015	113.72	100	1922	regulation of intracellular signal transduction	0.491868	1
GO:0048519	0.932559	0.900176	326.428	306	5517	negative regulation of biological process	0.182671	1
GO:0000077	0.932828	0.593612	9.82185	6	166	DNA damage checkpoint	3.95631	1
GO:0032535	0.933	0.735958	27.868	21	471	regulation of cellular component size	1.72002	1
GO:0070201	0.93433	0.773662	40.4116	32	683	regulation of establishment of protein localization	1.24642	1
GO:0072331	0.934367	0.674762	17.3362	12	293	signal transduction by p53 class mediator	2.53981	1
[truncated: 412 more rows]

## Sheet: GOBP_sexDEG_DR_fUP_220716
GOBPID	Pvalue	OddsRatio	ExpCount	Count	Size	Term	enrichment	padj
GO:0034976	9.36e-19	4.27516	19.0278	65	314	response to endoplasmic reticulum stress	11.9787	2.25e-15
GO:0006955	1.04e-15	2.03777	114.349	198	1887	immune response	1.01036	1.25e-12
GO:0006487	2.25e-14	8.10547	5.02965	28	83	protein N-linked glycosylation	73.8511	1.8e-11
GO:0018279	4.15e-13	17.8769	1.93914	17	32	protein N-linked glycosylation via asparagine	301.65	2.08e-10
GO:0002474	5.12e-13	6.28953	6.42341	30	106	antigen processing and presentation of peptide antigen via MHC class I	48.5137	2.08e-10
GO:0042590	5.19e-13	7.6495	4.84785	26	80	antigen processing and presentation of exogenous peptide antigen via MHC class I	73.8156	2.08e-10
GO:0018196	8.07e-13	16.7585	1.99974	17	33	peptidyl-asparagine modification	283.646	2.77e-10
GO:0035966	1.28e-12	4.04126	13.271	44	219	response to topologically incorrect protein	16.6694	3.84e-10
GO:0002479	2.07e-12	7.48632	4.72666	25	78	antigen processing and presentation of exogenous peptide antigen via MHC class I, TAP-dependent	74.6631	5.54e-10
GO:0043413	4.18e-12	3.73658	14.786	46	244	macromolecule glycosylation	14.0389	7.91e-10
GO:0006486	4.18e-12	3.73658	14.786	46	244	protein glycosylation	14.0389	7.91e-10
GO:1903513	4.28e-12	19.6783	1.63615	15	27	endoplasmic reticulum to cytosol transport	373.868	7.91e-10
GO:0030970	4.28e-12	19.6783	1.63615	15	27	retrograde protein transport, ER to cytosol	373.868	7.91e-10
GO:0050776	5.08e-12	2.2994	50.5995	102	835	regulation of immune response	2.65817	8.71e-10
GO:0070085	5.63e-12	3.63581	15.4525	47	255	glycosylation	13.1333	9.03e-10
GO:0006986	8.11e-12	4.10831	11.8772	40	196	response to unfolded protein	18.9192	1.22e-09
GO:0006810	1.11e-11	1.59108	315.111	411	5200	transport	0.276179	1.55e-09
GO:0050778	1.16e-11	2.50392	37.4497	82	618	positive regulation of immune response	3.90114	1.55e-09
GO:0032527	1.33e-11	10.3471	2.90871	19	48	protein exit from endoplasmic reticulum	149.839	1.68e-09
GO:0051234	1.57e-11	1.58317	322.443	418	5321	establishment of localization	0.268253	1.89e-09
GO:0006520	3.11e-11	3.07254	20.8458	55	344	cellular amino acid metabolic process	8.44502	3.54e-09
GO:0006890	3.24e-11	5.7951	6.12042	27	101	retrograde vesicle-mediated transport, Golgi to endoplasmic reticulum	48.0923	3.54e-09
GO:0002376	3.61e-11	1.67777	178.28	258	2942	immune system process	0.541613	3.75e-09
GO:0019882	3.74e-11	3.58442	14.6042	44	241	antigen processing and presentation	13.7649	3.75e-09
GO:0002833	5.83e-11	3.65833	13.6952	42	226	positive regulation of response to biotic stimulus	14.9413	5.61e-09
GO:0006952	1.17e-10	1.90937	85.201	144	1406	defense response	1.32357	1.08e-08
GO:0002684	1.36e-10	2.13433	54.9625	104	907	positive regulation of immune system process	2.29707	1.18e-08
GO:0036503	1.37e-10	5.35823	6.48401	27	107	ERAD pathway	42.85	1.18e-08
GO:0030968	1.47e-10	4.6114	8.36255	31	138	endoplasmic reticulum unfolded protein response	29.5773	1.22e-08
GO:0019221	1.92e-10	2.25931	44.4791	89	734	cytokine-mediated signaling pathway	3.0016	1.54e-08
GO:0002443	2.45e-10	2.16736	50.4177	97	832	leukocyte mediated immunity	2.54613	1.9e-08
GO:0048002	3.86e-10	3.67944	12.3014	38	203	antigen processing and presentation of peptide antigen	16.7551	2.9e-08
GO:0002223	4.19e-10	5.04129	6.787	27	112	stimulatory C-type lectin receptor signaling pathway	39.1095	3.03e-08
GO:0002478	4.29e-10	3.82982	11.2713	36	186	antigen processing and presentation of exogenous peptide antigen	18.9074	3.03e-08
GO:0002220	5.19e-10	4.98232	6.84759	27	113	innate immune response activating cell surface receptor signaling pathway	38.4204	3.56e-08
GO:0019884	5.85e-10	3.7789	11.3925	36	188	antigen processing and presentation of exogenous antigen	18.5072	3.9e-08
GO:0002758	6.41e-10	4.92471	6.90819	27	114	innate immune response-activating signal transduction	37.7493	4.17e-08
GO:0002274	1.05e-09	2.19264	44.5397	87	735	myeloid leukocyte activation	2.92617	6.66e-08
GO:0035967	1.18e-09	3.84178	10.6047	34	175	cellular response to topologically incorrect protein	20.1724	7.28e-08
GO:0032103	1.37e-09	2.49181	29.5113	65	487	positive regulation of response to external stimulus	4.97978	8.24e-08
GO:0009100	2.06e-09	2.63941	24.5423	57	405	glycoprotein metabolic process	6.31422	1.21e-07
GO:0006521	2.47e-09	6.44424	4.18127	20	69	regulation of cellular amino acid metabolic process	76.3285	1.41e-07
GO:0034620	2.6e-09	4.00707	9.33212	31	154	cellular response to unfolded protein	23.7506	1.45e-07
GO:0031349	2.82e-09	2.81716	20.3004	50	335	positive regulation of defense response	8.09534	1.54e-07
GO:0045089	3.38e-09	3.49946	12.1196	36	200	positive regulation of innate immune response	16.353	1.81e-07
GO:0045087	3.93e-09	2.13382	45.0244	86	743	innate immune response	2.83058	2.05e-07
GO:0030433	5.3e-09	5.43352	5.21144	22	86	ubiquitin-dependent ERAD pathway	54.0481	2.71e-07
GO:0098542	6.58e-09	1.99843	55.1443	99	910	defense response to other organism	2.17224	3.3e-07
GO:0045321	8.77e-09	1.81925	79.5048	130	1312	leukocyte activation	1.37224	4.26e-07
GO:0009101	8.85e-09	2.73809	20.361	49	336	glycoprotein biosynthetic process	7.88628	4.26e-07
GO:0002218	9.05e-09	4.11259	8.24135	28	136	activation of innate immune response	27.5065	4.26e-07
GO:0002253	9.5e-09	2.44797	27.5722	60	455	activation of immune response	5.26603	4.39e-07
GO:0002682	1.01e-08	1.78031	86.8978	139	1434	regulation of immune system process	1.22821	4.58e-07
GO:0038093	1.07e-08	3.25861	13.2104	37	218	Fc receptor signaling pathway	14.1463	4.77e-07
GO:0002831	1.15e-08	2.59566	23.0879	53	381	regulation of response to biotic stimulus	6.63408	5.03e-07
GO:0036498	1.21e-08	6.11532	4.12068	19	68	IRE1-mediated unfolded protein response	74.6605	5.2e-07
GO:0033238	1.32e-08	5.11248	5.45384	22	90	regulation of cellular amine metabolic process	49.3506	5.56e-07
GO:0034097	1.38e-08	1.84122	72.9602	121	1204	response to cytokine	1.51666	5.72e-07
GO:0043299	1.59e-08	2.20148	36.9649	73	610	leukocyte degranulation	3.56466	6.47e-07
GO:0018126	1.61e-08	10.7426	1.93914	13	32	protein hydroxylation	230.674	6.47e-07
GO:0071345	1.65e-08	1.86815	67.6882	114	1117	cellular response to cytokine stimulus	1.66017	6.48e-07
GO:0051179	1.69e-08	1.45629	409.098	491	6751	localization	0.195749	6.55e-07
GO:0019752	2.59e-08	1.88133	63.5675	108	1049	carboxylic acid metabolic process	1.78331	9.88e-07
GO:0001775	3.56e-08	1.73089	90.2913	141	1490	cell activation	1.15399	1.34e-06
GO:0033209	4.61e-08	3.46631	10.4835	31	173	tumor necrosis factor-mediated signaling pathway	18.8202	1.7e-06
GO:0006457	5.18e-08	3.03748	13.9982	37	231	protein folding	12.5989	1.89e-06
GO:0016192	5.37e-08	1.58795	140.648	200	2321	vesicle-mediated transport	0.674582	1.93e-06
GO:0043207	5.55e-08	1.78371	75.5659	122	1247	response to external biotic stimulus	1.42555	1.93e-06
GO:0051707	5.55e-08	1.78371	75.5659	122	1247	response to other organism	1.42555	1.93e-06
GO:0043436	6.04e-08	1.84027	65.3854	109	1079	oxoacid metabolic process	1.70113	2.08e-06
GO:0002275	6.4e-08	2.12761	37.5103	72	619	myeloid cell activation involved in immune response	3.41433	2.17e-06
GO:0042119	6.52e-08	2.17747	34.6622	68	572	neutrophil activation	3.77635	2.18e-06
GO:0043312	6.85e-08	2.18792	33.9956	67	561	neutrophil degranulation	3.86816	2.25e-06
GO:0009607	7.03e-08	1.76277	78.2928	125	1292	response to biotic stimulus	1.36063	2.28e-06
GO:0002444	7.8e-08	2.10366	38.4192	73	634	myeloid leukocyte mediated immunity	3.29989	2.5e-06
GO:0070498	8.23e-08	4.32673	6.48401	23	107	interleukin-1-mediated signaling pathway	36.5019	2.6e-06
GO:0002283	8.99e-08	2.16972	34.238	67	565	neutrophil activation involved in immune response	3.81358	2.77e-06
GO:0002429	9.09e-08	2.48694	22.5425	50	372	immune response-activating cell surface receptor signaling pathway	6.56507	2.77e-06
GO:0002757	9.09e-08	2.48694	22.5425	50	372	immune response-activating signal transduction	6.56507	2.77e-06
GO:0036230	9.75e-08	2.15093	35.0257	68	578	granulocyte activation	3.69835	2.93e-06
GO:0071702	1.31e-07	1.52014	173.977	236	2871	organic substance transport	0.520236	3.89e-06
GO:0010033	1.5e-07	1.48537	206.64	272	3410	response to organic substance	0.425026	4.4e-06
GO:0002446	1.55e-07	2.12074	35.4499	68	585	neutrophil mediated immunity	3.61037	4.48e-06
GO:0038095	1.83e-07	3.95154	7.27178	24	120	Fc-epsilon receptor signaling pathway	30.2833	5.2e-06
GO:0006820	1.85e-07	1.50499	180.946	243	2986	anion transport	0.495201	5.2e-06
GO:0042221	1.86e-07	1.44558	263.36	333	4346	response to chemical	0.320346	5.2e-06
GO:0002768	1.89e-07	2.37323	24.4211	52	403	immune response-regulating cell surface receptor signaling pathway	5.81766	5.24e-06
GO:0006888	1.98e-07	2.90652	14.1194	36	233	endoplasmic reticulum to Golgi vesicle-mediated transport	12.0488	5.4e-06
GO:0002764	2.05e-07	2.36632	24.4817	52	404	immune response-regulating signaling pathway	5.78889	5.54e-06
GO:0002252	2.2e-07	1.75062	73.445	117	1212	immune effector process	1.44722	5.88e-06
GO:0045088	2.44e-07	2.6266	17.9977	42	297	regulation of innate immune response	8.6515	6.44e-06
GO:0006954	2.9e-07	1.99363	41.9339	76	692	inflammatory response	2.88374	7.57e-06
GO:0002366	3.09e-07	1.94516	45.7516	81	755	leukocyte activation involved in immune response	2.58194	8e-06
GO:0006418	3.16e-07	6.87037	2.78752	14	46	tRNA aminoacylation for protein translation	120.217	8.02e-06
GO:1902036	3.17e-07	4.75173	4.96905	19	82	regulation of hematopoietic stem cell differentiation	51.343	8.02e-06
GO:0036507	3.53e-07	12.0432	1.39376	10	23	protein demannosylation	343.478	8.74e-06
GO:0036508	3.53e-07	12.0432	1.39376	10	23	protein alpha-1,2-demannosylation	343.478	8.74e-06
GO:0032940	3.86e-07	1.65779	91.4427	138	1509	secretion by cell	1.10117	9.47e-06
GO:0006082	4.03e-07	1.76026	67.87	109	1120	organic acid metabolic process	1.57887	9.78e-06
GO:0010565	4.1e-07	3.09202	11.5137	31	190	regulation of cellular ketone metabolic process	15.603	9.84e-06
GO:0002263	4.78e-07	1.92123	46.2364	81	763	cell activation involved in immune response	2.52808	1.14e-05
GO:0031347	5.38e-07	2.02802	37.3891	69	617	regulation of defense response	3.29332	1.27e-05
GO:0140352	5.57e-07	1.63671	94.5332	141	1560	export from cell	1.05275	1.3e-05
GO:0031145	6.98e-07	4.46681	5.21144	19	86	anaphase-promoting complex-dependent catabolic process	46.6779	1.61e-05
GO:0043039	7.5e-07	6.28017	2.96931	14	49	tRNA aminoacylation	105.948	1.72e-05
GO:0060218	9.68e-07	4.14705	5.81743	20	96	hematopoietic stem cell differentiation	39.4314	2.2e-05
GO:0043038	9.84e-07	6.1053	3.02991	14	50	amino acid activation	101.752	2.21e-05
GO:1901137	1.04e-06	1.93664	41.8127	74	690	carbohydrate derivative biosynthetic process	2.82415	2.32e-05
GO:0002250	1.1e-06	2.37638	21.0276	45	347	adaptive immune response	6.79061	2.43e-05
GO:0061418	1.22e-06	4.27448	5.39324	19	89	regulation of transcription from RNA polymerase II promoter in response to hypoxia	43.5841	2.66e-05
GO:0006517	1.51e-06	8.20521	1.93914	11	32	protein deglycosylation	195.186	3.28e-05
GO:0048193	1.63e-06	2.18761	26.1784	52	432	Golgi vesicle transport	5.0628	3.51e-05
GO:1901566	1.67e-06	1.56088	110.834	158	1829	organonitrogen compound biosynthetic process	0.858192	3.56e-05
GO:0030595	1.75e-06	2.8026	12.9074	32	213	leukocyte chemotaxis	12.8158	3.69e-05
GO:1904152	1.78e-06	21.8597	0.727178	7	12	regulation of retrograde protein transport, ER to cytosol	883.264	3.71e-05
GO:0045055	2.12e-06	1.77534	55.8109	91	921	regulated exocytosis	1.94929	4.39e-05
GO:0044106	2.4e-06	3.07121	10.0593	27	166	cellular amine metabolic process	17.8034	4.94e-05
GO:0006811	2.44e-06	1.41573	222.456	282	3671	ion transport	0.38022	4.96e-05
GO:0031146	2.45e-06	4.0423	5.63563	19	93	SCF-dependent proteasomal ubiquitin-dependent protein catabolic process	39.9156	4.96e-05
GO:1904380	2.62e-06	13.8903	1.03017	8	17	endoplasmic reticulum mannose trimming	502.976	5.26e-05
GO:0046903	2.84e-06	1.57274	99.8658	144	1648	secretion	0.963392	5.64e-05
GO:0006950	2.94e-06	1.40399	235.909	296	3893	response to stress	0.354877	5.78e-05
GO:0006887	3.07e-06	1.7116	63.5069	100	1048	exocytosis	1.65437	6e-05
GO:0010498	3.12e-06	2.02778	31.814	59	525	proteasomal protein catabolic process	3.88945	6.04e-05
GO:0070887	3.23e-06	1.42213	203.852	261	3364	cellular response to chemical stimulus	0.419067	6.22e-05
GO:0071705	3.41e-06	1.47293	150.708	202	2487	nitrogen compound transport	0.59341	6.51e-05
GO:0055085	3.69e-06	1.58494	92.7152	135	1530	transmembrane transport	1.04787	6.99e-05
GO:0071569	4.61e-06	77.9234	0.363589	5	6	protein ufmylation	2523.61	8.4e-05
GO:0097466	4.61e-06	77.9234	0.363589	5	6	ubiquitin-dependent glycoprotein ERAD pathway	2523.61	8.4e-05
GO:0035977	4.61e-06	77.9234	0.363589	5	6	protein deglycosylation involved in glycoprotein catabolic process	2523.61	8.4e-05
GO:0036179	4.61e-06	77.9234	0.363589	5	6	osteoclast maturation	2523.61	8.4e-05
GO:1904382	4.61e-06	77.9234	0.363589	5	6	mannose trimming involved in glycoprotein ERAD pathway	2523.61	8.4e-05
GO:0045454	4.7e-06	4.24226	4.84785	17	80	cell redox homeostasis	48.2641	8.49e-05
GO:0009308	4.81e-06	2.94289	10.4229	27	172	amine metabolic process	16.583	8.62e-05
GO:0071347	5.37e-06	2.92253	10.4835	27	173	cellular response to interleukin-1	16.3918	9.57e-05
GO:1901532	6.48e-06	3.73757	5.99922	19	99	regulation of hematopoietic progenitor cell differentiation	35.224	0.000114511
GO:1990266	6.58e-06	3.57855	6.5446	20	108	neutrophil migration	31.1557	0.000115459
GO:0071310	6.63e-06	1.43523	169.251	221	2793	cellular response to organic substance	0.514761	0.000115571
GO:0050851	6.73e-06	2.51835	15.0283	34	248	antigen receptor-mediated signaling pathway	10.0445	0.000116388
GO:0019511	7.32e-06	11.3632	1.15137	8	19	peptidyl-proline hydroxylation	402.659	0.000125657
GO:0038061	7.94e-06	2.72979	11.9378	29	197	NIK/NF-kappaB signaling	13.5775	0.000135409
GO:0043161	9.54e-06	2.0238	28.5417	53	471	proteasome-mediated ubiquitin-dependent protein catabolic process	4.34099	0.000161444
GO:0010972	1.01e-05	3.45985	6.7264	20	111	negative regulation of G2/M transition of mitotic cell cycle	29.4944	0.000169914
GO:0050852	1.07e-05	2.68134	12.1196	29	200	T cell receptor signaling pathway	13.1732	0.000178612
GO:0070555	1.57e-05	2.61931	12.362	29	204	response to interleukin-1	12.6617	0.000260835
GO:0001666	2.01e-05	2.05485	24.9059	47	411	response to hypoxia	5.05556	0.000330244
GO:0032101	2.65e-05	1.63943	61.083	93	1008	regulation of response to external stimulus	1.66309	0.000433237
GO:0036293	3.26e-05	1.99402	26.1178	48	431	response to decreased oxygen levels	4.69507	0.0005296
GO:0050900	3.33e-05	1.94781	28.3599	51	468	leukocyte migration	4.23091	0.000538065
GO:0006891	3.81e-05	6.01619	2.18153	10	36	intra-Golgi vesicle-mediated transport	140.201	0.000603919
GO:0097186	3.82e-05	8.33074	1.39376	8	23	amelogenesis	274.783	0.000603919
GO:0006829	3.82e-05	8.33074	1.39376	8	23	zinc ion transport	274.783	0.000603919
GO:1904587	3.88e-05	25.9709	0.484785	5	8	response to glycoprotein	1419.53	0.000605536
GO:0006616	3.88e-05	25.9709	0.484785	5	8	SRP-dependent cotranslational protein targeting to membrane, translocation	1419.53	0.000605536
GO:0097529	3.9e-05	2.47599	12.968	29	214	myeloid leukocyte migration	11.506	0.000605536
GO:0051649	3.98e-05	1.37567	186.582	235	3079	establishment of localization in cell	0.450405	0.000612641
GO:0071356	4e-05	2.25263	17.0281	35	281	cellular response to tumor necrosis factor	8.05398	0.000612938
GO:1902750	4.23e-05	3.08437	7.39298	20	122	negative regulation of cell cycle G2/M phase transition	24.4155	0.000643285
GO:0097530	4.34e-05	2.97739	7.99896	21	132	granulocyte migration	21.8991	0.000656363
GO:0042886	4.54e-05	1.42873	131.74	174	2174	amide transport	0.668937	0.000682707
GO:2000736	4.77e-05	3.05421	7.45358	20	123	regulation of stem cell differentiation	24.0201	0.000711775
GO:0002520	5.32e-05	1.59646	63.8705	95	1054	immune system development	1.55381	0.000789063
GO:0030097	5.57e-05	1.62329	58.1743	88	960	hemopoiesis	1.73498	0.000822071
GO:0045899	5.78e-05	13.3672	0.787776	6	13	positive regulation of RNA polymerase II transcription preinitiation complex assembly	645.089	0.000847587
GO:0015833	5.87e-05	1.42412	129.68	171	2140	peptide transport	0.678459	0.000849317
GO:0015031	5.87e-05	1.42795	127.014	168	2096	protein transport	0.694835	0.000849317
GO:0030593	5.9e-05	3.53699	5.27204	16	87	neutrophil chemotaxis	38.4093	0.000849317
GO:0060326	6.2e-05	2.19807	17.3917	35	287	cell chemotaxis	7.72074	0.000887465
GO:0033036	6.77e-05	1.3484	207.488	256	3424	macromolecule localization	0.39676	0.000962409
GO:0002244	6.98e-05	2.47624	12.059	27	199	hematopoietic progenitor cell differentiation	12.3883	0.000987273
GO:0018208	7.07e-05	4.15685	3.75709	13	62	peptidyl-proline modification	61.449	0.000994599
GO:0043618	7.59e-05	2.93921	7.69597	20	127	regulation of transcription from RNA polymerase II promoter in response to stress	22.5308	0.00106033
GO:0071577	7.76e-05	9.10378	1.15137	7	19	zinc ion transmembrane transport	352.327	0.00107822
GO:0071895	8.3e-05	19.4768	0.545384	5	9	odontoblast differentiation	1121.6	0.00113981
GO:0097187	8.3e-05	19.4768	0.545384	5	9	dentinogenesis	1121.6	0.00113981
GO:0062012	8.4e-05	1.89526	27.8752	49	460	regulation of small molecule metabolic process	4.20761	0.00114501
GO:0034612	8.43e-05	2.13398	18.3612	36	303	response to tumor necrosis factor	7.12479	0.00114501
GO:0060071	8.49e-05	2.91179	7.75657	20	128	Wnt signaling pathway, planar cell polarity pathway	22.1802	0.00114657
GO:0048534	8.9e-05	1.59017	60.5982	90	1000	hematopoietic or lymphoid organ development	1.6353	0.00119484
GO:0045184	9.13e-05	1.40583	133.437	174	2202	establishment of protein localization	0.652033	0.00121873
GO:0034975	9.6e-05	11.6955	0.848375	6	14	protein folding in endoplasmic reticulum	556.224	0.00127512
GO:0070098	0.0001	3.99328	3.87828	13	64	chemokine-mediated signaling pathway	57.6685	0.00131313
GO:0032649	0.0001	3.99328	3.87828	13	64	regulation of interferon-gamma production	57.6685	0.00131313
GO:0090175	0.000105863	2.85845	7.87776	20	130	regulation of establishment of planar polarity	21.503	0.00138313
GO:0070166	0.000113154	8.40291	1.21196	7	20	enamel mineralization	317.975	0.0014638
GO:0070661	0.000113256	2.15025	17.2099	34	284	leukocyte proliferation	7.65944	0.0014638
GO:0070861	0.000139163	6.57507	1.63615	8	27	regulation of protein exit from endoplasmic reticulum	199.396	0.00178903
GO:0043620	0.000145907	2.78198	8.05956	20	133	regulation of DNA-templated transcription in response to stress	20.5438	0.00186575
GO:0043487	0.000148768	2.35163	12.6044	27	208	regulation of RNA stability	11.3395	0.00189227
GO:0070482	0.000154286	1.85448	27.8146	48	459	response to oxygen levels	4.13972	0.00195212
GO:0099612	0.000157657	15.5804	0.605982	5	10	protein localization to axon	908.5	0.00198433
GO:0002688	0.000164912	2.9442	6.90819	18	114	regulation of leukocyte chemotaxis	25.1662	0.00205976
GO:0031529	0.000165364	3.53862	4.60546	14	76	ruffle organization	44.0409	0.00205976
GO:0002685	0.000171726	2.2877	13.3922	28	221	regulation of leukocyte migration	10.4167	0.00212799
GO:0050867	0.000174008	2.02541	19.755	37	326	positive regulation of cell activation	6.32589	0.00214521
GO:0002521	0.000175615	1.78537	31.814	53	525	leukocyte differentiation	3.49391	0.00215397
GO:0009605	0.000184491	1.35501	161.555	203	2666	response to external stimulus	0.518956	0.00225135
GO:0032609	0.000190641	3.70183	4.12068	13	68	interferon-gamma production	51.0835	0.00231465
GO:0071621	0.000204645	2.99752	6.42341	17	106	granulocyte chemotaxis	27.4911	0.0024722
GO:0042102	0.000211129	3.26609	5.27204	15	87	positive regulation of T cell proliferation	36.0087	0.00253777
GO:0071456	0.000215856	2.25221	13.574	28	224	cellular response to hypoxia	10.1395	0.00258168
GO:1901264	0.000220054	3.42756	4.72666	14	78	carbohydrate derivative transport	41.8113	0.00261886
GO:0044788	0.000225704	5.20802	2.18153	9	36	modulation by host of viral process	126.181	0.00267287
GO:0071391	0.000230501	9.35508	0.969571	6	16	cellular response to estrogen stimulus	425.859	0.0027163
GO:0070663	0.000238554	2.27522	12.968	27	214	regulation of leukocyte proliferation	10.7125	0.00278672
GO:1902622	0.000238795	4.59806	2.66632	10	44	regulation of neutrophil migration	93.8533	0.00278672
GO:0044281	0.000253157	1.39375	119.015	155	1964	small molecule metabolic process	0.730136	0.00294005
GO:1901607	0.000257841	3.57144	4.24187	13	70	alpha-amino acid biosynthetic process	48.2061	0.00298004
GO:0007159	0.000260372	1.94056	21.6336	39	357	leukocyte cell-cell adhesion	5.56011	0.00298459
GO:0002460	0.000260717	2.18798	14.4224	29	238	adaptive immune response based on somatic recombination of immune receptors built from immunoglobulin superfamily domains	9.30249	0.00298459
GO:0048199	0.000273363	3.17737	5.39324	15	89	vesicle targeting, to, from or within Golgi	34.4085	0.00311453
GO:0032944	0.000331328	2.26203	12.5438	26	207	regulation of mononuclear cell proliferation	11.0252	0.00375713
GO:0030178	0.00033537	2.18439	13.9376	28	230	negative regulation of Wnt signaling pathway	9.61739	0.00377956
GO:0042180	0.00033645	2.08996	16.0585	31	265	cellular ketone metabolic process	8.02093	0.00377956
GO:1901135	0.000340178	1.49044	70.6575	99	1166	carbohydrate derivative metabolic process	1.3231	0.00380367
GO:0051641	0.000373658	1.29304	231.667	276	3823	cellular localization	0.343127	0.00415867
GO:0002696	0.000385525	1.97436	19.0884	35	315	positive regulation of leukocyte activation	6.40917	0.00427098
GO:0090263	0.000401671	2.48108	9.33212	21	154	positive regulation of canonical Wnt signaling pathway	16.0891	0.00442944
GO:0065008	0.000416138	1.28203	253.846	299	4189	regulation of biological quality	0.309603	0.00456802
GO:0001736	0.00042954	2.53325	8.72614	20	144	establishment of planar polarity	17.5251	0.00467246
GO:0007164	0.00042954	2.53325	8.72614	20	144	establishment of tissue polarity	17.5251	0.00467246
GO:0006465	0.000447341	11.1273	0.727178	5	12	signal peptide processing	630.903	0.00484418
GO:0090090	0.000460098	2.24807	12.1196	25	200	negative regulation of canonical Wnt signaling pathway	11.3562	0.00495998
GO:0030851	0.000503165	5.20346	1.93914	8	32	granulocyte differentiation	141.953	0.00540004
GO:0008104	0.000530365	1.31026	180.401	220	2977	protein localization	0.451045	0.00561692
GO:0043687	0.000530432	1.83205	23.9363	41	395	post-translational protein modification	4.77468	0.00561692
GO:0030163	0.000531448	1.49837	63.0221	89	1040	protein catabolic process	1.49513	0.00561692
GO:0048584	0.000536525	1.34623	137.255	173	2265	positive regulation of response to stimulus	0.612724	0.00561692
GO:0034505	0.000537393	6.06667	1.51495	7	25	tooth mineralization	203.504	0.00561692
GO:0010499	0.000537393	6.06667	1.51495	7	25	proteasomal ubiquitin-independent protein catabolic process	203.504	0.00561692
GO:0070972	0.000562906	2.47289	8.90793	20	147	protein localization to endoplasmic reticulum	16.8171	0.00585812
GO:0006886	0.000574381	1.44365	78.6564	107	1298	intracellular protein transport	1.15396	0.00595178
GO:0046649	0.000610991	1.60878	41.5704	63	686	lymphocyte activation	2.43247	0.00630396
GO:0006882	0.000667507	7.19472	1.15137	6	19	cellular zinc ion homeostasis	301.994	0.00685764
GO:0044419	0.000683803	1.35306	124.347	158	2052	biological process involved in interspecies interaction between organisms	0.6818	0.00699516
GO:0030852	0.00069079	9.73571	0.787776	5	13	regulation of granulocyte differentiation	537.574	0.007007
GO:0018401	0.00069079	9.73571	0.787776	5	13	peptidyl-proline hydroxylation to 4-hydroxy-L-proline	537.574	0.007007
GO:0051788	0.000697291	5.74697	1.57555	7	26	response to misfolded protein	188.151	0.00704323
GO:0002449	0.00070173	2.10405	13.877	27	229	lymphocyte mediated immunity	9.35508	0.00705841
GO:0006911	0.000713798	3.35217	4.12068	12	68	phagocytosis, engulfment	47.154	0.00714988
GO:0051603	0.00074511	1.56091	46.8424	69	773	proteolysis involved in cellular protein catabolic process	2.09819	0.00743254
GO:0036294	0.000760233	2.06017	14.6648	28	242	cellular response to decreased oxygen levels	8.68725	0.00755207
GO:0070665	0.000771709	2.54367	7.81717	18	129	positive regulation of leukocyte proliferation	19.6539	0.00763452
GO:0033554	0.000783435	1.33748	133.801	168	2208	cellular response to stress	0.626132	0.00771876
GO:0042129	0.000865206	2.37839	9.21092	20	152	regulation of T cell proliferation	15.7289	0.0083961
GO:0032943	0.000865803	1.98578	16.2403	30	268	mononuclear cell proliferation	7.58939	0.0083961
GO:1990868	0.000866153	3.0825	4.78726	13	79	response to chemokine	37.8481	0.0083961
GO:1990869	0.000866153	3.0825	4.78726	13	79	cellular response to chemokine	37.8481	0.0083961
GO:0006508	0.000900375	1.37003	105.32	136	1738	proteolysis	0.818077	0.00863424
GO:0045898	0.000905087	6.68035	1.21196	6	20	regulation of RNA polymerase II transcription preinitiation complex assembly	272.55	0.00863424
GO:0044794	0.000905087	6.68035	1.21196	6	20	positive regulation by host of viral process	272.55	0.00863424
GO:0055069	0.000905087	6.68035	1.21196	6	20	zinc ion homeostasis	272.55	0.00863424
GO:0050865	0.000970176	1.64451	34.1774	53	564	regulation of cell activation	3.02742	0.00920702
GO:0050863	0.000972789	1.88154	19.3308	34	319	regulation of T cell activation	6.07089	0.00920702
GO:0006959	0.00100637	2.28979	9.9987	21	165	humoral immune response	14.0154	0.00948746
GO:0002523	0.00102123	8.65336	0.848375	5	14	leukocyte migration involved in inflammatory response	463.52	0.00957633
GO:0002687	0.00102376	2.40395	8.66554	19	143	positive regulation of leukocyte migration	16.8825	0.00957633
GO:0002573	0.00104102	2.0425	14.2406	27	235	myeloid leukocyte differentiation	8.88348	0.00970004
GO:0043488	0.00106055	2.14337	12.1196	24	200	regulation of mRNA stability	10.902	0.00984387
GO:0072507	0.00106757	1.7007	28.7235	46	474	divalent inorganic cation homeostasis	3.72011	0.00987089
GO:0006909	0.00108394	1.86816	19.452	34	321	phagocytosis	5.99548	0.0099663
GO:0022409	0.00108618	1.93042	17.2099	31	284	positive regulation of cell-cell adhesion	6.98361	0.0099663
GO:1903039	0.00110096	2.06536	13.574	26	224	positive regulation of leukocyte cell-cell adhesion	9.41526	0.0100564
GO:0001817	0.00110436	1.61834	35.9953	55	594	regulation of cytokine production	2.83234	0.0100564
GO:0060261	0.00112866	5.19892	1.69675	7	28	positive regulation of transcription initiation from RNA polymerase II promoter	162.232	0.0102389
GO:0006490	0.00120276	6.23456	1.27256	6	21	oligosaccharide-lipid intermediate biosynthetic process	247.211	0.0108701
GO:0050670	0.00121836	2.11899	12.2408	24	202	regulation of lymphocyte proliferation	10.6872	0.0109698
GO:0050896	0.00123591	1.2324	500.965	546	8267	response to stimulus	0.145162	0.0110863
GO:0050671	0.00130238	2.49014	7.51417	17	124	positive regulation of lymphocyte proliferation	20.0891	0.0116391
GO:0002690	0.00137222	2.77386	5.63563	14	93	positive regulation of leukocyte chemotaxis	29.4115	0.0122179
GO:0006901	0.00138848	2.90555	5.02965	13	83	vesicle coating	34.288	0.012278
GO:0032963	0.00139014	2.5577	6.90819	16	114	collagen metabolic process	22.37	0.012278
GO:0072503	0.0013943	1.69653	27.5116	44	454	cellular divalent inorganic cation homeostasis	3.87879	0.012278
GO:0032946	0.00142442	2.46691	7.57477	17	125	positive regulation of mononuclear cell proliferation	19.769	0.0124974
GO:0045579	0.00145593	7.78749	0.908973	5	15	positive regulation of B cell differentiation	403.778	0.0127275
GO:0032729	0.00153197	3.79781	2.78752	9	46	positive regulation of interferon-gamma production	77.2826	0.0133437
GO:0009617	0.00153914	1.62158	33.2684	51	549	response to bacterium	3.07454	0.0133577
GO:0042110	0.00156641	1.66461	29.2689	46	483	T cell activation	3.58277	0.0135128
GO:0044257	0.00156825	1.4932	51.5691	73	851	cellular protein catabolic process	1.83155	0.0135128
GO:0002694	0.0016005	1.64377	30.9051	48	510	regulation of leukocyte activation	3.35317	0.0137414
GO:0051249	0.00167049	1.71281	25.3906	41	419	regulation of lymphocyte activation	4.24337	0.0142914
GO:0006515	0.00174545	4.74618	1.81795	7	30	protein quality control for misfolded or incompletely synthesized proteins	141.322	0.0148796
GO:0071219	0.00176061	2.13195	11.1501	22	184	cellular response to molecule of bacterial origin	11.8071	0.0149558
GO:0002697	0.00178494	1.77388	21.573	36	356	regulation of immune effector process	5.16128	0.0151091
GO:0001819	0.00182255	1.80399	20.058	34	331	positive regulation of cytokine production	5.63869	0.0153733
GO:0015909	0.00195018	2.93152	4.60546	12	76	long-chain fatty acid transport	37.7493	0.0163924
GO:0046651	0.00201269	1.9147	15.6343	28	258	lymphocyte proliferation	7.64317	0.0168025
GO:0006525	0.00201294	7.07904	0.969571	5	16	arginine metabolic process	354.883	0.0168025
GO:0071216	0.00206849	2.02672	12.7256	24	210	cellular response to biotic stimulus	9.88844	0.0172064
GO:0045453	0.00214931	2.74773	5.27204	13	87	bone resorption	31.2076	0.0178171
GO:0048207	0.00218572	2.88622	4.66606	12	77	vesicle targeting, rough ER to cis-Golgi	36.7752	0.0179837
GO:0048208	0.00218572	2.88622	4.66606	12	77	COPII vesicle coating	36.7752	0.0179837
GO:0030177	0.00219186	2.05181	12.059	23	199	positive regulation of Wnt signaling pathway	10.553	0.0179837
GO:0001738	0.00220428	2.17836	9.9381	20	164	morphogenesis of a polarized epithelium	13.5113	0.0180241
GO:0016064	0.00235719	2.49785	6.6052	15	109	immunoglobulin mediated immune response	22.94	0.0191442
GO:0006903	0.00235719	2.49785	6.6052	15	109	vesicle targeting	22.94	0.0191442
GO:0031334	0.00245654	1.82045	18.1189	31	299	positive regulation of protein-containing complex assembly	6.30049	0.0198839
GO:0042098	0.00247358	2.06739	11.4531	22	189	T cell proliferation	11.1906	0.0199546
GO:0042116	0.00251301	2.57698	5.99922	14	99	macrophage activation	25.9545	0.0201839
GO:0071453	0.00251879	1.88144	15.8767	28	262	cellular response to oxygen levels	7.41157	0.0201839
GO:0071218	0.00255249	5.19438	1.45436	6	24	cellular response to misfolded protein	189.271	0.0203185
GO:0009067	0.00255249	5.19438	1.45436	6	24	aspartate family amino acid biosynthetic process	189.271	0.0203185
GO:0009894	0.00257936	1.40184	69.0213	92	1139	regulation of catabolic process	1.28853	0.0204647
GO:0006958	0.00259623	4.36588	1.93914	7	32	complement activation, classical pathway	124.209	0.0205307
GO:0061013	0.00263898	1.95371	13.6952	25	226	regulation of mRNA catabolic process	8.89361	0.0208004
GO:0019941	0.00265973	1.52271	40.7826	59	673	modification-dependent protein catabolic process	2.36688	0.0208954
GO:0006047	0.00271081	6.48867	1.03017	5	17	UDP-N-acetylglucosamine metabolic process	314.36	0.0212273
GO:0002920	0.00274165	2.96323	4.18127	11	69	regulation of humoral immune response	41.9807	0.0213991
GO:0030225	0.00280501	3.42634	3.02991	9	50	macrophage differentiation	65.412	0.0218134
GO:0019724	0.00282089	2.44547	6.7264	15	111	B cell mediated immunity	22.1208	0.0218134
GO:0030316	0.00282762	2.36335	7.39298	16	122	osteoclast differentiation	19.5324	0.0218134
GO:0008360	0.00283102	2.00565	12.3014	23	203	regulation of cell shape	10.1412	0.0218134
GO:0030865	0.00303516	2.75831	4.84785	12	80	cortical cytoskeleton organization	34.0688	0.0233116
GO:0001816	0.00309789	1.52201	39.3888	57	650	cytokine production	2.45134	0.0237176
GO:0090022	0.00312578	4.19767	1.99974	7	33	regulation of neutrophil chemotaxis	116.795	0.0238394
GO:0042742	0.00313857	2.10453	10.2411	20	169	defense response to bacterium	12.7236	0.0238394
GO:0010876	0.00314355	1.5741	32.7836	49	541	lipid localization	3.04198	0.0238394
GO:0071674	0.00318612	2.05851	10.9683	21	181	mononuclear cell migration	11.6471	0.0240312
GO:0070841	0.00318884	4.92065	1.51495	6	25	inclusion body assembly	174.432	0.0240312
GO:0090317	0.00329986	3.67049	2.54512	8	42	negative regulation of intracellular protein transport	82.4036	0.0247902
GO:0050870	0.00340787	1.97235	12.4832	23	206	positive regulation of T cell activation	9.84801	0.0255055
GO:0044267	0.00341629	1.21203	315.353	354	5204	cellular protein metabolic process	0.237511	0.0255055
GO:1903037	0.00349007	1.77323	18.543	31	306	regulation of leukocyte cell-cell adhesion	6.01553	0.0259756
GO:0070106	0.00356835	5.98913	1.09077	5	18	interleukin-27-mediated signaling pathway	280.401	0.0264763
GO:0035567	0.0035953	2.07636	10.3623	20	171	non-canonical Wnt signaling pathway	12.4278	0.0265941
GO:0006511	0.00366734	1.50286	40.5402	58	669	ubiquitin-dependent protein catabolic process	2.35467	0.0270439
GO:0002755	0.003734	4.04192	2.06034	7	34	MyD88-dependent toll-like receptor signaling pathway	110.026	0.0272242
GO:1902624	0.003734	4.04192	2.06034	7	34	positive regulation of neutrophil migration	110.026	0.0272242
GO:2000144	0.003734	4.04192	2.06034	7	34	positive regulation of DNA-templated transcription, initiation	110.026	0.0272242
GO:0090114	0.0037371	2.67913	4.96905	12	82	COPII-coated vesicle budding	32.4271	0.0272242
GO:0043632	0.0039206	1.49223	41.5098	59	685	modification-dependent macromolecule catabolic process	2.28468	0.0284747
GO:0046849	0.00397476	2.347	6.96879	15	115	bone remodeling	20.6087	0.0285445
GO:0072676	0.00397771	2.43297	6.30221	14	104	lymphocyte migration	23.5189	0.0285445
GO:0006613	0.00397771	2.43297	6.30221	14	104	cotranslational protein targeting to membrane	23.5189	0.0285445
GO:1903426	0.00397771	2.43297	6.30221	14	104	regulation of reactive oxygen species biosynthetic process	23.5189	0.0285445
GO:0051251	0.00427963	1.80306	16.4827	28	272	positive regulation of lymphocyte activation	6.87662	0.0306198
GO:0038094	0.00431657	2.3236	7.02939	15	116	Fc-gamma receptor signaling pathway	20.2549	0.0307924
GO:0097502	0.00442804	3.8973	2.12094	7	35	mannosylation	103.829	0.0314941
GO:1901741	0.00460436	5.56095	1.15137	5	19	positive regulation of myoblast fusion	251.662	0.0324601
GO:0043652	0.00460436	5.56095	1.15137	5	19	engulfment of apoptotic cell	251.662	0.0324601
GO:0006488	0.00460436	5.56095	1.15137	5	19	dolichol-linked oligosaccharide biosynthetic process	251.662	0.0324601
GO:2000377	0.00486041	1.90894	12.8468	23	212	regulation of reactive oxygen species metabolic process	9.29846	0.034165
GO:0042592	0.00488438	1.28392	121.196	148	2000	homeostatic process	0.67229	0.0342334
GO:0045785	0.00492351	1.58062	28.6023	43	472	positive regulation of cell adhesion	3.50703	0.0344073
GO:0099024	0.00502924	2.56849	5.15085	12	85	plasma membrane invagination	30.1785	0.0350443
GO:0071675	0.00507202	2.27817	7.15059	15	118	regulation of mononuclear cell migration	19.5741	0.0352403
GO:1901564	0.00542036	1.1914	402.069	440	6635	organonitrogen compound metabolic process	0.181604	0.037552
GO:0072599	0.00548803	2.2561	7.21118	15	119	establishment of protein localization to endoplasmic reticulum	19.2465	0.0379115
GO:0006875	0.00551114	1.52277	33.7532	49	557	cellular metal ion homeostasis	2.86973	0.0379621
GO:0031329	0.00569165	1.39137	58.659	78	968	regulation of cellular catabolic process	1.51251	0.0390935
GO:0051716	0.00574187	1.18924	421.218	459	6951	cellular response to stimulus	0.172613	0.0393261
GO:0090023	0.00580881	4.24877	1.69675	6	28	positive regulation of neutrophil chemotaxis	139.056	0.0396715
GO:0060628	0.00583746	5.18986	1.21196	5	20	regulation of ER to Golgi vesicle-mediated transport	227.125	0.0397542
GO:0071622	0.00589292	3.28321	2.78752	8	46	regulation of granulocyte chemotaxis	68.6957	0.0399058
GO:0009225	0.00589292	3.28321	2.78752	8	46	nucleotide-sugar metabolic process	68.6957	0.0399058
GO:0019538	0.00596041	1.19287	342.44	379	5651	protein metabolic process	0.215647	0.0402495
GO:0006956	0.00609028	2.78742	3.99948	10	66	complement activation	41.7126	0.0409732
GO:0046320	0.0061028	3.63697	2.24213	7	37	regulation of fatty acid oxidation	92.9072	0.0409732
GO:0030500	0.00612845	2.39031	5.93862	13	98	regulation of bone mineralization	24.595	0.0409732
GO:1903428	0.00613576	2.98769	3.3935	9	56	positive regulation of reactive oxygen species biosynthetic process	52.146	0.0409732
GO:0098771	0.00615894	1.44699	44.1155	61	728	inorganic ion homeostasis	2.09133	0.0410141
GO:0055065	0.00621401	1.48121	38.1769	54	630	metal ion homeostasis	2.47211	0.0412666
GO:0007154	0.00630633	1.18905	367.286	404	6061	cell communication	0.199824	0.0417642
GO:0055080	0.0063627	1.44895	43.3277	60	715	cation homeostasis	2.13252	0.0420218
GO:0006399	0.00639013	1.95833	10.9077	20	180	tRNA metabolic process	11.216	0.0420874
GO:0002455	0.00673356	3.1988	2.84811	8	47	humoral immune response mediated by circulating immunoglobulin	65.8035	0.0442281
GO:0048583	0.00681431	1.2049	248.877	282	4107	regulation of response to stimulus	0.303777	0.0446365
GO:0071624	0.00695607	4.06376	1.75735	6	29	positive regulation of granulocyte chemotaxis	129.631	0.0450943
GO:0050974	0.00695607	4.06376	1.75735	6	29	detection of mechanical stimulus involved in sensory perception	129.631	0.0450943
GO:0051123	0.00695607	4.06376	1.75735	6	29	RNA polymerase II preinitiation complex assembly	129.631	0.0450943
GO:1901605	0.00695923	1.87415	12.4832	22	206	alpha-amino acid metabolic process	9.41983	0.0450943
GO:0060260	0.00709836	3.51941	2.30273	7	38	regulation of transcription initiation from RNA polymerase II promoter	88.0817	0.0457492
GO:0032655	0.00709836	3.51941	2.30273	7	38	regulation of interleukin-12 production	88.0817	0.0457492
GO:0051092	0.00727264	1.97038	10.3017	19	170	positive regulation of NF-kappaB transcription factor activity	11.9457	0.0467471
GO:0001774	0.0076618	3.11861	2.90871	8	48	microglial cell activation	63.0903	0.0491173
GO:0044255	0.00790039	1.34964	66.5368	86	1098	cellular lipid metabolic process	1.29613	0.0505121
GO:0046486	0.00823381	1.5445	27.8146	41	459	glycerolipid metabolic process	3.53601	0.0525042
GO:0051043	0.00825873	3.89417	1.81795	6	30	regulation of membrane protein ectodomain proteolysis	121.133	0.0525238
GO:0045047	0.00831426	2.2104	6.84759	14	113	protein targeting to ER	19.9217	0.0527374
GO:0006873	0.00865647	1.44743	39.6918	55	655	cellular ion homeostasis	2.32935	0.0547635
GO:0002703	0.00889144	1.85858	11.9984	21	198	regulation of leukocyte mediated immunity	9.73294	0.0561024
GO:1901739	0.00896694	4.57865	1.33316	5	22	regulation of myoblast fusion	187.707	0.0561368
GO:0032930	0.00896694	4.57865	1.33316	5	22	positive regulation of superoxide anion generation	187.707	0.0561368
GO:0051044	0.00896694	4.57865	1.33316	5	22	positive regulation of membrane protein ectodomain proteolysis	187.707	0.0561368
GO:0060828	0.00910886	1.65876	19.0278	30	314	regulation of canonical Wnt signaling pathway	5.52862	0.0568771
GO:0019725	0.00915491	1.35711	60.7194	79	1002	cellular homeostasis	1.42971	0.0570166
GO:0001894	0.00919036	1.70825	16.6645	27	275	tissue homeostasis	6.48714	0.0570486
GO:0071706	0.00923125	2.11279	7.63537	15	126	tumor necrosis factor superfamily cytokine production	17.1674	0.0570486
GO:0006900	0.00923125	2.11279	7.63537	15	126	vesicle budding from membrane	17.1674	0.0570486
GO:0032386	0.00929759	1.56861	24.7241	37	408	regulation of intracellular transport	4.03865	0.0573113
GO:0055074	0.00936804	1.53925	27.2086	40	449	calcium ion homeostasis	3.60514	0.0575979
GO:0010324	0.00943612	2.34261	5.57503	12	92	membrane invagination	25.7609	0.0577637
GO:0032615	0.00944306	3.30565	2.42393	7	40	interleukin-12 production	79.4938	0.0577637
GO:0050801	0.00948557	1.40485	46.7818	63	772	ion homeostasis	1.92071	0.0578765
GO:0006869	0.00956226	1.5202	28.9053	42	477	lipid transport	3.35403	0.0581966
GO:0030866	0.0096571	2.7526	3.63589	9	60	cortical actin cytoskeleton organization	45.425	0.0586254
GO:0036035	0.00972762	3.73814	1.87854	6	31	osteoclast development	113.444	0.0589048
GO:0046474	0.0100167	1.73454	15.2101	25	251	glycerophospholipid biosynthetic process	7.2102	0.0605027
GO:0045778	0.0101641	2.55805	4.30247	10	71	positive regulation of ossification	36.0444	0.0610861
GO:0050906	0.0101641	2.55805	4.30247	10	71	detection of stimulus involved in sensory perception	36.0444	0.0610861
GO:0070830	0.0103305	2.41848	4.96905	11	82	bicellular tight junction assembly	29.7249	0.0619316
GO:0071222	0.0103959	1.89429	10.6653	19	176	cellular response to lipopolysaccharide	11.1451	0.0621686
GO:0007249	0.0105208	1.61094	20.8458	32	344	I-kappaB kinase/NF-kappaB signaling	4.91347	0.0627594
GO:0071806	0.0107371	2.69947	3.69649	9	61	protein transmembrane transport	43.9479	0.0638911
GO:0030111	0.0107648	1.55144	24.9664	37	412	regulation of Wnt signaling pathway	3.96061	0.063898
GO:0030574	0.010807	3.2082	2.48453	7	41	collagen catabolic process	75.6633	0.0639904
GO:1901550	0.0108976	4.32398	1.39376	5	23	regulation of endothelial cell development	171.739	0.0640537
GO:0007271	0.0108976	4.32398	1.39376	5	23	synaptic transmission, cholinergic	171.739	0.0640537
GO:1903140	0.0108976	4.32398	1.39376	5	23	regulation of establishment of endothelial barrier	171.739	0.0640537
GO:0051851	0.011182	2.51662	4.36307	10	72	modulation by host of symbiont process	35.0502	0.0655646
GO:0030003	0.0113196	1.43396	38.5404	53	636	cellular cation homeostasis	2.38077	0.0662103
GO:0050996	0.0113733	3.59412	1.93914	6	32	positive regulation of lipid catabolic process	106.465	0.0663628
GO:0010389	0.0114865	1.73341	14.6042	24	241	regulation of G2/M transition of mitotic cell cycle	7.50814	0.0668609
GO:0050994	0.0119052	2.64836	3.75709	9	62	regulation of lipid catabolic process	42.5416	0.0689643
GO:0030501	0.0119052	2.64836	3.75709	9	62	positive regulation of bone mineralization	42.5416	0.0689643
GO:0008654	0.0119416	1.65137	17.8159	28	294	phospholipid biosynthetic process	5.88597	0.0690088
GO:0023052	0.0120006	1.1701	365.771	399	6036	signaling	0.198989	0.0691835
GO:1903533	0.0120583	2.25746	5.75683	12	95	regulation of protein targeting	24.1596	0.0693498
GO:0006650	0.012102	1.58021	21.8759	33	361	glycerophospholipid metabolic process	4.60102	0.0694349
GO:0000041	0.0121399	2.03874	7.87776	15	130	transition metal ion transport	16.1272	0.0694864
GO:0008652	0.0122888	2.3519	5.09025	11	84	cellular amino acid biosynthetic process	28.3262	0.0701174
GO:0045730	0.0123085	3.11632	2.54512	7	42	respiratory burst	72.1032	0.0701174
GO:0030449	0.0123586	2.83432	3.15111	8	52	regulation of complement activation	53.7574	0.0702368
GO:0002819	0.0128114	1.92659	9.39272	17	155	regulation of adaptive immune response	12.857	0.0726384
GO:2000027	0.0128977	1.787	12.4226	21	205	regulation of animal organ morphogenesis	9.0796	0.0729553
GO:0120193	0.0130463	2.23043	5.81743	12	96	tight junction organization	23.6589	0.0733617
GO:0090036	0.0130937	4.09612	1.45436	5	24	regulation of protein kinase C signaling	157.726	0.0733617
GO:0031998	0.0130937	4.09612	1.45436	5	24	regulation of fatty acid beta-oxidation	157.726	0.0733617
GO:0006644	0.0131001	1.51048	26.9662	39	445	phospholipid metabolic process	3.57849	0.0733617
GO:0042531	0.0131656	2.59913	3.81769	9	63	positive regulation of tyrosine phosphorylation of STAT protein	41.2018	0.0733617
GO:0042554	0.0132061	3.46076	1.99974	6	33	superoxide anion generation	100.11	0.0733617
GO:0040036	0.0132061	3.46076	1.99974	6	33	regulation of fibroblast growth factor receptor signaling pathway	100.11	0.0733617
GO:0016053	0.0132136	1.60678	19.5732	30	323	organic acid biosynthetic process	5.22482	0.0733617
GO:0046907	0.0133583	1.24326	119.197	142	1967	intracellular transport	0.66686	0.0738768
GO:0046889	0.0133679	2.31995	5.15085	11	85	positive regulation of lipid biosynthetic process	27.6637	0.0738768
GO:2000401	0.0134471	2.43764	4.48427	10	74	regulation of lymphocyte migration	33.1812	0.0741443
GO:0006493	0.0135207	2.13721	6.5446	13	108	protein O-linked glycosylation	20.2512	0.0743795
GO:0007165	0.0137352	1.1685	335.047	367	5529	signal transduction	0.218136	0.0753869
GO:0098751	0.0138057	2.77114	3.2117	8	53	bone cell development	51.748	0.075601
GO:0072593	0.014123	1.62645	18.0583	28	298	reactive oxygen species metabolic process	5.72902	0.0771629
GO:1903555	0.0147333	2.044	7.33238	14	121	regulation of tumor necrosis factor superfamily cytokine production	17.3745	0.0803148
GO:0019730	0.0153724	2.71071	3.2723	8	54	antimicrobial humoral response	49.8491	0.0834204
GO:0032387	0.0153724	2.71071	3.2723	8	54	negative regulation of intracellular transport	49.8491	0.0834204
GO:0060143	0.01557	3.89105	1.51495	5	25	positive regulation of syncytium formation by plasma membrane fusion	145.36	0.0836837
GO:0060563	0.01557	3.89105	1.51495	5	25	neuroepithelial cell differentiation	145.36	0.0836837
GO:0035459	0.01557	3.89105	1.51495	5	25	vesicle cargo loading	145.36	0.0836837
GO:0032928	0.01557	3.89105	1.51495	5	25	regulation of superoxide anion generation	145.36	0.0836837
GO:2000379	0.015595	2.09285	6.6658	13	110	positive regulation of reactive oxygen species metabolic process	19.5215	0.0836837
GO:0120192	0.0157395	2.25859	5.27204	11	87	tight junction assembly	26.4064	0.0842712
GO:0006874	0.0164396	1.4928	26.542	38	438	cellular calcium ion homeostasis	3.59907	0.0877309
GO:1903131	0.0164815	1.52956	23.2091	34	383	mononuclear cell differentiation	4.2115	0.0877309
GO:1901988	0.0164952	1.65276	15.8767	25	262	negative regulation of cell cycle phase transition	6.61748	0.0877309
GO:1903409	0.0168158	2.00622	7.45358	14	123	reactive oxygen species biosynthetic process	16.8141	0.089239
GO:0001885	0.0170373	2.2291	5.33264	11	88	endothelial cell development	25.8097	0.0902153
GO:0070232	0.0174719	3.22164	2.12094	6	35	regulation of T cell apoptotic process	88.9959	0.0920701
GO:0070169	0.0175408	2.46182	3.99948	9	66	positive regulation of biomineral tissue development	37.5413	0.0920701
GO:0110151	0.0175408	2.46182	3.99948	9	66	positive regulation of biomineralization	37.5413	0.0920701
GO:0030520	0.0175408	2.46182	3.99948	9	66	intracellular estrogen receptor signaling pathway	37.5413	0.0920701
GO:0030282	0.0177894	1.93683	8.24135	15	136	bone mineralization	14.7356	0.0931716
GO:0038096	0.0179031	2.05029	6.787	13	112	Fc-gamma receptor signaling pathway involved in phagocytosis	18.8305	0.0933387
GO:0002433	0.0179031	2.05029	6.787	13	112	immune response-regulating cell surface receptor signaling pathway involved in phagocytosis	18.8305	0.0933387
GO:0097581	0.0179378	1.98784	7.51417	14	124	lamellipodium organization	16.544	0.0933387
GO:0030098	0.0183064	1.54872	20.9064	31	345	lymphocyte differentiation	4.73237	0.0948153
GO:0009226	0.0183399	3.7055	1.57555	5	26	nucleotide-sugar biosynthetic process	134.393	0.0948153
GO:0007252	0.0183399	3.7055	1.57555	5	26	I-kappaB phosphorylation	134.393	0.0948153
GO:1903557	0.0188853	2.5974	3.3935	8	56	positive regulation of tumor necrosis factor superfamily cytokine production	46.352	0.0974255
GO:0070167	0.0191497	2.02964	6.84759	13	113	regulation of biomineral tissue development	18.4987	0.0983673
GO:0110149	0.0191497	2.02964	6.84759	13	113	regulation of biomineralization	18.4987	0.0983673
GO:2000142	0.0198286	2.79593	2.78752	7	46	regulation of DNA-templated transcription, initiation	60.1087	0.101421
GO:0045429	0.0198286	2.79593	2.78752	7	46	positive regulation of nitric oxide biosynthetic process	60.1087	0.101421
GO:0070528	0.0199233	3.11404	2.18153	6	36	protein kinase C signaling	84.1204	0.101474
GO:2000810	0.0199233	3.11404	2.18153	6	36	regulation of bicellular tight junction assembly	84.1204	0.101474
GO:0002822	0.0200615	1.90507	8.36255	15	138	regulation of adaptive immune response based on somatic recombination of immune receptors built from immunoglobulin superfamily domains	14.3116	0.101962
GO:0045834	0.0201866	1.82	9.8775	17	163	positive regulation of lipid metabolic process	11.626	0.102381
GO:0050805	0.0205994	2.26021	4.78726	10	79	negative regulation of synaptic transmission	29.1139	0.104255
GO:0002699	0.0208175	1.74784	11.4531	19	189	positive regulation of immune effector process	9.66462	0.105137
GO:0050920	0.0209187	1.67142	13.8164	22	228	regulation of chemotaxis	7.68967	0.105342
GO:0002221	0.0209458	1.71896	12.2408	20	202	pattern recognition receptor signaling pathway	8.90599	0.105342
GO:0046503	0.0209924	2.37804	4.12068	9	68	glycerolipid catabolic process	35.3655	0.105356
GO:0050921	0.021277	1.88958	8.42315	15	139	positive regulation of chemotaxis	14.1064	0.106371
GO:0051702	0.0214105	2.14506	5.51443	11	91	biological process involved in interaction with symbiont	24.136	0.106371
GO:0006516	0.0214158	3.53682	1.63615	5	27	glycoprotein catabolic process	124.623	0.106371
GO:0048143	0.0214158	3.53682	1.63615	5	27	astrocyte activation	124.623	0.106371
GO:0034315	0.0214158	3.53682	1.63615	5	27	regulation of Arp2/3 complex-mediated actin nucleation	124.623	0.106371
GO:0034613	0.0217877	1.21087	132.346	154	2184	cellular protein localization	0.586638	0.107995
GO:0097242	0.0221202	2.72584	2.84811	7	47	amyloid-beta clearance	57.5781	0.108746
GO:0043300	0.0221202	2.72584	2.84811	7	47	regulation of leukocyte degranulation	57.5781	0.108746
GO:0070897	0.0221202	2.72584	2.84811	7	47	transcription preinitiation complex assembly	57.5781	0.108746
GO:1904407	0.0221202	2.72584	2.84811	7	47	positive regulation of nitric oxide metabolic process	57.5781	0.108746
GO:0033157	0.0222349	1.57256	17.9371	27	296	regulation of intracellular protein transport	5.59932	0.109087
GO:0042100	0.0223106	2.22777	4.84785	10	80	B cell proliferation	28.3906	0.109236
GO:1902749	0.0224077	1.61963	15.5131	24	256	regulation of cell cycle G2/M phase transition	6.65405	0.109488
GO:0002706	0.0225472	1.87433	8.48375	15	140	regulation of lymphocyte mediated immunity	13.9056	0.109946
GO:0071677	0.02289	2.33824	4.18127	9	69	positive regulation of mononuclear cell migration	34.3478	0.111392
GO:0048863	0.0230166	1.59789	16.3615	25	270	stem cell differentiation	6.23114	0.111782
GO:0002224	0.0232072	1.82463	9.27152	16	153	toll-like receptor signaling pathway	12.4192	0.11248
GO:0002821	0.0233221	2.03535	6.30221	12	104	positive regulation of adaptive immune response	20.159	0.112809
GO:0022603	0.0239217	1.27921	68.8395	85	1136	regulation of anatomical structure morphogenesis	1.19679	0.115477
GO:0009064	0.0241225	2.19624	4.90845	10	81	glutamine family amino acid metabolic process	27.6939	0.116213
GO:0007166	0.0242152	1.18091	182.098	206	3005	cell surface receptor signaling pathway	0.414508	0.116427
GO:0030001	0.0244149	1.41908	30.7233	42	507	metal ion transport	2.96885	0.117152
GO:0033146	0.0245887	2.65917	2.90871	7	48	regulation of intracellular estrogen receptor signaling pathway	55.204	0.117752
GO:0060142	0.0248086	3.38282	1.69675	5	28	regulation of syncytium formation by plasma membrane fusion	115.88	0.118099
GO:2000108	0.0248086	3.38282	1.69675	5	28	positive regulation of leukocyte apoptotic process	115.88	0.118099
GO:0008210	0.0248086	3.38282	1.69675	5	28	estrogen metabolic process	115.88	0.118099
GO:0008610	0.0252147	1.33533	46.5394	60	768	lipid biosynthetic process	1.84835	0.119795
GO:0022604	0.0255514	1.47327	23.9969	34	396	regulation of cell morphogenesis	3.93952	0.121155
GO:0070727	0.0261816	1.2019	133.134	154	2197	cellular macromolecule localization	0.579716	0.123899
GO:0002431	0.0263817	1.93232	7.15059	13	118	Fc receptor mediated stimulatory signaling pathway	16.9642	0.124306
GO:0098656	0.026399	1.40451	31.7534	43	524	anion transmembrane transport	2.84551	0.124306
GO:0045017	0.0264227	1.55989	17.3917	26	287	glycerolipid biosynthetic process	5.73541	0.124306
GO:0006636	0.0272397	2.59568	2.96931	7	49	unsaturated fatty acid biosynthetic process	52.9738	0.12765
GO:0032755	0.0272397	2.59568	2.96931	7	49	positive regulation of interleukin-6 production	52.9738	0.12765
GO:0006612	0.027636	1.6634	12.6044	20	208	protein targeting to membrane	8.39959	0.129255
GO:0060070	0.027878	1.49044	21.6336	31	357	canonical Wnt signaling pathway	4.41957	0.129984
GO:1901991	0.0279002	1.59946	15.0283	23	248	negative regulation of mitotic cell cycle phase transition	6.79484	0.129984
GO:0046394	0.0281857	1.52286	19.149	28	316	carboxylic acid biosynthetic process	5.09494	0.131061
GO:0030032	0.0284551	2.04235	5.75683	11	95	lamellipodium assembly	22.1463	0.132058
GO:0030099	0.0292941	1.41109	29.3901	40	485	myeloid cell differentiation	3.08981	0.13569
GO:0006605	0.0294655	1.41695	28.5417	39	471	protein targeting	3.19431	0.136221
GO:0065002	0.0300783	2.53514	3.02991	7	50	intracellular protein transmembrane transport	50.876	0.138257
GO:0070231	0.0300783	2.53514	3.02991	7	50	T cell apoptotic process	50.876	0.138257
GO:2000249	0.0300783	2.53514	3.02991	7	50	regulation of actin cytoskeleton reorganization	50.876	0.138257
GO:0022617	0.0301914	2.10676	5.09025	10	84	extracellular matrix disassembly	25.7511	0.138512
GO:0033559	0.0304492	2.01818	5.81743	11	96	unsaturated fatty acid metabolic process	21.6873	0.139428
GO:0016579	0.0310364	1.52069	18.4824	27	305	protein deubiquitination	5.27374	0.141847
GO:1901565	0.0313773	1.23285	88.1098	105	1454	organonitrogen compound catabolic process	0.902434	0.143133
GO:0071692	0.0316707	1.42944	26.1178	36	431	protein localization to extracellular region	3.5213	0.144103
GO:0072678	0.0317098	2.1915	4.42367	9	73	T cell migration	30.6868	0.144103
GO:0008643	0.0317833	1.74734	9.63511	16	159	carbohydrate transport	11.4995	0.144164
GO:0022407	0.0324693	1.41903	27.0268	37	446	regulation of cell-cell adhesion	3.37977	0.145588
GO:0050729	0.0325007	1.82092	8.12016	14	134	positive regulation of inflammatory response	14.1669	0.145588
GO:0061515	0.032541	1.99457	5.87802	11	97	myeloid cell development	21.2424	0.145588
GO:0001773	0.0325817	3.11176	1.81795	5	30	myeloid dendritic cell activation	100.944	0.145588
GO:0043304	0.0325817	3.11176	1.81795	5	30	regulation of mast cell degranulation	100.944	0.145588
GO:0002675	0.0325817	3.11176	1.81795	5	30	positive regulation of acute inflammatory response	100.944	0.145588
GO:0006505	0.0325817	3.11176	1.81795	5	30	GPI anchor metabolic process	100.944	0.145588
GO:0006506	0.0325817	3.11176	1.81795	5	30	GPI anchor biosynthetic process	100.944	0.145588
GO:0043123	0.0329201	1.62829	12.8468	20	212	positive regulation of I-kappaB kinase/NF-kappaB signaling	8.08562	0.146827
GO:0006661	0.0343254	1.80574	8.18075	14	135	phosphatidylinositol biosynthetic process	13.9578	0.152812
GO:0002526	0.0347327	1.97151	5.93862	11	98	acute inflammatory response	20.8111	0.154339
GO:0045766	0.0350113	1.66394	11.3319	18	187	positive regulation of angiogenesis	9.35286	0.155004
GO:1904018	0.0350113	1.66394	11.3319	18	187	positive regulation of vasculature development	9.35286	0.155004
GO:0032640	0.0354425	1.84384	7.45358	13	123	tumor necrosis factor production	15.6131	0.156624
GO:0002709	0.0356554	2.26572	3.81769	8	63	regulation of T cell mediated immunity	36.6238	0.1568
GO:0050982	0.035678	2.66825	2.48453	6	41	detection of mechanical stimulus	64.8543	0.1568
GO:0034110	0.035678	2.66825	2.48453	6	41	regulation of homotypic cell-cell adhesion	64.8543	0.1568
GO:0070646	0.0359175	1.48599	19.5732	28	323	protein modification by small protein removal	4.8765	0.157565
GO:0006641	0.036374	1.89051	6.7264	12	111	triglyceride metabolic process	17.6966	0.159277
GO:0006809	0.0369027	2.12479	4.54486	9	75	nitric oxide biosynthetic process	29.072	0.160455
GO:0007193	0.0369027	2.12479	4.54486	9	75	adenylate cyclase-inhibiting G protein-coupled receptor signaling pathway	29.072	0.160455
GO:0060561	0.0369767	2.99187	1.87854	5	31	apoptotic process involved in morphogenesis	94.5369	0.160455
GO:0033006	0.0369767	2.99187	1.87854	5	31	regulation of mast cell activation involved in immune response	94.5369	0.160455
GO:0033622	0.0369767	2.99187	1.87854	5	31	integrin activation	94.5369	0.160455
GO:0050727	0.0372565	1.4695	20.4822	29	338	regulation of inflammatory response	4.61232	0.161378
GO:0098609	0.0375562	1.27985	54.8414	68	905	cell-cell adhesion	1.50857	0.162193
GO:0051240	0.0375797	1.22263	87.8674	104	1450	positive regulation of multicellular organismal process	0.898778	0.162193
GO:0031214	0.038562	1.66968	10.6653	17	176	biomineral tissue development	9.97191	0.165553
GO:0110148	0.038562	1.66968	10.6653	17	176	biomineralization	9.97191	0.165553
GO:0006633	0.0385648	1.73428	9.08973	15	150	fatty acid biosynthetic process	12.1133	0.165553
GO:0030888	0.0386744	2.22511	3.87828	8	64	regulation of B cell proliferation	35.4883	0.165728
GO:0034341	0.039515	1.61327	12.3014	19	203	response to interferon-gamma	8.37754	0.168234
GO:0010543	0.0395729	2.59395	2.54512	6	42	regulation of platelet activation	61.8027	0.168234
GO:0051817	0.0396256	1.81066	7.57477	13	125	modulation of process of other organism involved in symbiotic interaction	15.1174	0.168234
GO:0042509	0.0397052	2.09293	4.60546	9	76	regulation of tyrosine phosphorylation of STAT protein	28.312	0.168234
GO:0098659	0.0397052	2.09293	4.60546	9	76	inorganic cation import across plasma membrane	28.312	0.168234
GO:0099587	0.0397052	2.09293	4.60546	9	76	inorganic ion import across plasma membrane	28.312	0.168234
GO:0000209	0.0397491	1.44986	21.4518	30	354	protein polyubiquitination	4.3498	0.168234
GO:0009966	0.0399267	1.15605	194.278	216	3206	regulation of signal transduction	0.38184	0.168688
GO:0090407	0.0400323	1.32014	40.6614	52	671	organophosphate biosynthetic process	2.09852	0.168838
GO:0034220	0.0402437	1.23263	77.0203	92	1271	ion transmembrane transport	1.03479	0.169432
GO:0015908	0.0403584	1.65913	10.7259	17	177	fatty acid transport	9.85956	0.169437
GO:0010243	0.0403857	1.24086	71.5059	86	1180	response to organonitrogen compound	1.12225	0.169437
GO:0006629	0.0410422	1.21593	89.1399	105	1471	lipid metabolic process	0.881696	0.171891
GO:0009306	0.041331	1.40279	25.8148	35	426	protein secretion	3.50432	0.172499
GO:0035592	0.041331	1.40279	25.8148	35	426	establishment of protein localization to extracellular region	3.50432	0.172499
GO:0071425	0.0417181	2.88086	1.93914	5	32	hematopoietic stem cell proliferation	88.7207	0.173813
GO:0006801	0.0418597	2.18592	3.93888	8	65	superoxide metabolic process	34.4047	0.174101
GO:0051223	0.0425381	1.31773	39.9342	51	659	regulation of protein transport	2.1338	0.175861
GO:0045669	0.0425746	1.97273	5.39324	10	89	positive regulation of osteoblast differentiation	22.939	0.175861
GO:0051650	0.0426201	1.52373	15.6949	23	259	establishment of vesicle localization	6.22993	0.175861
GO:0050871	0.0426485	2.06201	4.66606	9	77	positive regulation of B cell activation	27.5814	0.175861
GO:0007260	0.0426485	2.06201	4.66606	9	77	tyrosine phosphorylation of STAT protein	27.5814	0.175861
GO:0002437	0.043399	2.31873	3.2723	7	54	inflammatory response to antigenic stimulus	43.618	0.178344
GO:0032760	0.043399	2.31873	3.2723	7	54	positive regulation of tumor necrosis factor production	43.618	0.178344
GO:0045601	0.0437272	2.52367	2.60572	6	43	regulation of endothelial cell differentiation	58.9616	0.179386
GO:0000165	0.0438445	1.26275	57.1441	70	943	MAPK cascade	1.43031	0.179561
GO:0043297	0.0445384	1.88432	6.18101	11	102	apical junction assembly	19.2109	0.182092
GO:0015849	0.0449844	1.43178	21.6941	30	358	organic acid transport	4.25314	0.183603
GO:0045428	0.045214	2.14808	3.99948	8	66	regulation of nitric oxide biosynthetic process	33.3701	0.184228
GO:0002456	0.0454126	1.94794	5.45384	10	90	T cell mediated immunity	22.4321	0.184724
GO:0007029	0.0457349	2.03198	4.72666	9	78	endoplasmic reticulum organization	26.8787	0.185721
GO:0045577	0.0468095	2.77778	1.99974	5	33	regulation of B cell differentiation	83.4252	0.188654
GO:0006730	0.0468095	2.77778	1.99974	5	33	one-carbon metabolic process	83.4252	0.188654
GO:1902116	0.0468095	2.77778	1.99974	5	33	negative regulation of organelle assembly	83.4252	0.188654
GO:0048741	0.0468095	2.77778	1.99974	5	33	skeletal muscle fiber development	83.4252	0.188654
GO:0035821	0.0468495	1.71971	8.54434	14	141	modulation of process of other organism	12.7951	0.188654
GO:0032675	0.0472588	1.86371	6.24161	11	103	regulation of interleukin-6 production	18.8397	0.189983
GO:0030162	0.0476919	1.28713	45.6304	57	753	regulation of proteolysis	1.82658	0.191404
GO:1902742	0.0481444	2.45709	2.66632	6	44	apoptotic process involved in development	56.312	0.192898
GO:0046850	0.0487399	2.11153	4.06008	8	67	regulation of bone remodeling	32.3814	0.194773
GO:0045732	0.0487742	1.51456	15.0889	22	249	positive regulation of protein catabolic process	6.44732	0.194773
GO:0045930	0.0494479	1.427	21.0276	29	347	negative regulation of mitotic cell cycle	4.37617	0.197136
GO:0043122	0.0497053	1.4574	18.4824	26	305	regulation of I-kappaB kinase/NF-kappaB signaling	5.07842	0.197834
GO:1901575	0.0502725	1.16505	142.83	161	2357	organic substance catabolic process	0.526577	0.199761
GO:1903214	0.0512901	2.22378	3.3935	7	56	regulation of protein targeting to mitochondrion	40.558	0.203468
GO:0030278	0.0516541	1.69281	8.66554	14	143	regulation of ossification	12.4397	0.204574
GO:0030217	0.0519304	1.51884	14.3618	21	237	T cell differentiation	6.79325	0.205073
GO:0070201	0.0520673	1.29391	41.3886	52	683	regulation of establishment of protein localization	2.02543	0.205073
GO:0048871	0.0522145	1.333	32.4806	42	536	multicellular organismal homeostasis	2.65628	0.205073
GO:0090314	0.0522533	2.68181	2.06034	5	34	positive regulation of protein targeting to membrane	78.59	0.205073
GO:0046209	0.0523455	1.97447	4.84785	9	80	nitric oxide metabolic process	25.5516	0.205073
GO:0007043	0.0524208	1.59849	11.0895	17	183	cell-cell junction assembly	9.22363	0.205073
GO:0080164	0.0524396	2.07619	4.12068	8	68	regulation of nitric oxide metabolic process	31.436	0.205073
GO:0002673	0.0528269	2.39392	2.72692	6	45	regulation of acute inflammatory response	53.837	0.205073
GO:0006656	0.0528269	2.39392	2.72692	6	45	phosphatidylcholine biosynthetic process	53.837	0.205073
GO:0006953	0.0528269	2.39392	2.72692	6	45	acute-phase response	53.837	0.205073
GO:0010863	0.0528269	2.39392	2.72692	6	45	positive regulation of phospholipase C activity	53.837	0.205073
GO:0034314	0.0528269	2.39392	2.72692	6	45	Arp2/3 complex-mediated actin nucleation	53.837	0.205073
GO:0007186	0.0529442	1.27184	47.7514	59	788	G protein-coupled receptor signaling pathway	1.72645	0.205073
GO:0010608	0.0529742	1.29547	40.5402	51	669	posttranscriptional regulation of gene expression	2.07049	0.205073
GO:0002790	0.0530903	1.35747	28.1176	37	464	peptide secretion	3.12263	0.205192
GO:0042176	0.0537188	1.362	27.2692	36	450	regulation of protein catabolic process	3.23022	0.207226
GO:0051090	0.053789	1.35006	29.0265	38	479	regulation of DNA-binding transcription factor activity	3.00931	0.207226
GO:0032680	0.053902	1.76481	7.15059	12	118	regulation of tumor necrosis factor production	15.6593	0.207329
GO:0048010	0.0542419	1.71788	7.93836	13	131	vascular endothelial growth factor receptor signaling pathway	13.7643	0.20797
GO:0051224	0.0542419	1.71788	7.93836	13	131	negative regulation of protein transport	13.7643	0.20797
GO:0019637	0.0557635	1.22577	67.1428	80	1108	organophosphate metabolic process	1.18404	0.213464
GO:0002708	0.0560908	1.80448	6.42341	11	106	positive regulation of lymphocyte mediated immunity	17.7884	0.214376
GO:0006935	0.056627	1.28539	41.6309	52	687	chemotaxis	2.00191	0.216081
GO:2000403	0.0577766	2.33391	2.78752	6	46	positive regulation of lymphocyte migration	51.5217	0.220119
GO:0070102	0.0580502	2.59223	2.12094	5	35	interleukin-6-mediated signaling pathway	74.1633	0.220811
GO:0042330	0.0590147	1.28117	41.7521	52	689	taxis	1.99031	0.224126
GO:0019886	0.0592629	1.78556	6.48401	11	107	antigen processing and presentation of exogenous peptide antigen via MHC class II	17.4574	0.224552
GO:0071346	0.0593139	1.56978	11.2713	17	186	cellular response to interferon-gamma	8.92849	0.224552
GO:0016042	0.0594547	1.40795	20.5428	28	339	lipid catabolic process	4.42704	0.224731
GO:0045576	0.0600297	2.13628	3.51469	7	58	mast cell activation	37.8092	0.225716
GO:0009066	0.0600297	2.13628	3.51469	7	58	aspartate family amino acid metabolic process	37.8092	0.225716
GO:0006509	0.0600297	2.13628	3.51469	7	58	membrane protein ectodomain proteolysis	37.8092	0.225716
GO:0006897	0.0600907	1.28246	40.9038	51	675	endocytosis	2.03384	0.225716
GO:0055082	0.0605629	1.25439	49.9935	61	825	cellular chemical homeostasis	1.62846	0.227134
GO:0090087	0.0614759	1.27697	41.8733	52	691	regulation of peptide transport	1.9788	0.22998
GO:0002824	0.0615131	1.83272	5.75683	10	95	positive regulation of adaptive immune response based on somatic recombination of immune receptors built from immunoglobulin superfamily domains	20.133	0.22998
GO:0002495	0.0625511	1.76703	6.5446	11	108	antigen processing and presentation of peptide antigen via MHC class II	17.1356	0.233121
GO:0032635	0.0625511	1.76703	6.5446	11	108	interleukin-6 production	17.1356	0.233121
GO:0043303	0.0629946	2.27683	2.84811	6	47	mast cell degranulation	49.3526	0.233121
GO:0043277	0.0629946	2.27683	2.84811	6	47	apoptotic cell clearance	49.3526	0.233121
GO:0002448	0.0629946	2.27683	2.84811	6	47	mast cell mediated immunity	49.3526	0.233121
GO:0048247	0.0629946	2.27683	2.84811	6	47	lymphocyte chemotaxis	49.3526	0.233121
GO:0051897	0.063032	1.57979	10.5441	16	174	positive regulation of protein kinase B signaling	9.60233	0.233121
GO:0044089	0.0631836	1.29067	37.4497	47	618	positive regulation of cellular component biogenesis	2.23602	0.233323
GO:0009967	0.0636668	1.17644	103.199	118	1703	positive regulation of signal transduction	0.739278	0.234747
GO:0044070	0.0642454	1.23436	56.5987	68	934	regulation of anion transport	1.41635	0.236518
GO:0061028	0.0645987	1.97691	4.30247	8	71	establishment of endothelial barrier	28.8355	0.237454
GO:0006110	0.0651251	1.81128	5.81743	10	96	regulation of glycolytic process	19.7157	0.239024
GO:0008284	0.0655516	1.23449	55.7503	67	920	positive regulation of cell population proliferation	1.43832	0.240222
GO:1904950	0.0658036	1.66109	8.18075	13	135	negative regulation of establishment of protein localization	12.9608	0.240779
GO:0009056	0.0660579	1.14002	172.099	190	2840	catabolic process	0.428028	0.241216
GO:0002705	0.0661237	1.70016	7.39298	12	122	positive regulation of leukocyte mediated immunity	14.6493	0.241216
GO:0002237	0.0667531	1.38968	20.7852	28	343	response to molecule of bacterial origin	4.32439	0.243143
GO:0002279	0.0684812	2.22246	2.90871	6	48	mast cell activation involved in immune response	47.3177	0.248425
GO:1900274	0.0684812	2.22246	2.90871	6	48	regulation of phospholipase C activity	47.3177	0.248425
GO:0045862	0.0685132	1.34802	25.2088	33	416	positive regulation of proteolysis	3.46483	0.248425
GO:0044242	0.0687864	1.46378	14.8466	21	245	cellular lipid catabolic process	6.35685	0.248969
GO:0019217	0.0688704	1.79034	5.87802	10	97	regulation of fatty acid metabolic process	19.3113	0.248969
GO:0002504	0.0694793	1.73109	6.6658	11	110	antigen processing and presentation of peptide or polysaccharide antigen via MHC class II	16.5182	0.250207
GO:0097178	0.0696292	2.05538	3.63589	7	60	ruffle assembly	35.3306	0.250207
GO:0050885	0.0696292	2.05538	3.63589	7	60	neuromuscular process controlling balance	35.3306	0.250207
GO:0045124	0.0696292	2.05538	3.63589	7	60	regulation of bone resorption	35.3306	0.250207
GO:0090322	0.0706999	2.42988	2.24213	5	37	regulation of superoxide metabolic process	66.3623	0.251796
GO:0032722	0.0706999	2.42988	2.24213	5	37	positive regulation of chemokine production	66.3623	0.251796
GO:0006968	0.0706999	2.42988	2.24213	5	37	cellular defense response	66.3623	0.251796
GO:0007129	0.0706999	2.42988	2.24213	5	37	homologous chromosome pairing at meiosis	66.3623	0.251796
GO:0010574	0.0706999	2.42988	2.24213	5	37	regulation of vascular endothelial growth factor production	66.3623	0.251796
GO:0055081	0.0706999	2.42988	2.24213	5	37	anion homeostasis	66.3623	0.251796
GO:2001057	0.0715011	1.84393	5.15085	9	85	reactive nitrogen species metabolic process	22.6339	0.254273
GO:0033143	0.0727497	1.76987	5.93862	10	98	regulation of intracellular steroid hormone receptor signaling pathway	18.9192	0.258246
GO:0051091	0.0728331	1.41465	17.5129	24	289	positive regulation of DNA-binding transcription factor activity	5.2212	0.258246
GO:1901570	0.0747528	2.01718	3.69649	7	61	fatty acid derivative biosynthetic process	34.1817	0.264663
GO:0006639	0.0754709	1.62088	8.36255	13	138	acylglycerol metabolic process	12.4034	0.266812
GO:0006614	0.0767636	1.74986	5.99922	10	99	SRP-dependent cotranslational protein targeting to membrane	18.5389	0.270983
GO:0090313	0.0775477	2.35609	2.30273	5	38	regulation of protein targeting to membrane	62.9155	0.272153
GO:0001975	0.0775477	2.35609	2.30273	5	38	response to amphetamine	62.9155	0.272153
GO:0033003	0.0775477	2.35609	2.30273	5	38	regulation of mast cell activation	62.9155	0.272153
GO:0010573	0.0775477	2.35609	2.30273	5	38	vascular endothelial growth factor production	62.9155	0.272153
GO:0046488	0.0777585	1.50661	11.6954	17	193	phosphatidylinositol metabolic process	8.29257	0.272495
GO:0052547	0.0784173	1.32291	26.4208	34	436	regulation of peptidase activity	3.24983	0.274404
GO:0048878	0.0788613	1.19191	73.142	85	1207	chemical homeostasis	1.06013	0.275556
GO:0015711	0.079943	1.3388	23.8151	31	393	organic anion transport	3.64696	0.27824
GO:1903311	0.0800044	1.35296	22.0577	29	364	regulation of mRNA metabolic process	3.97695	0.27824
GO:0014902	0.0800302	1.64005	7.63537	12	126	myotube differentiation	13.7339	0.27824
GO:0032642	0.0800924	1.98036	3.75709	7	62	regulation of chemokine production	33.0879	0.27824
GO:0022602	0.0802573	2.12115	3.02991	6	50	ovulation cycle process	43.608	0.278411
GO:0097006	0.0809125	1.7303	6.05982	10	100	regulation of plasma lipoprotein particle levels	18.17	0.280279
GO:0080134	0.0813705	1.17513	86.413	99	1426	regulation of response to stress	0.884608	0.28146
GO:0045595	0.0816587	1.16093	103.441	117	1707	regulation of cell differentiation	0.729581	0.282051
GO:0045446	0.0823994	1.59514	8.48375	13	140	endothelial cell differentiation	12.0515	0.284201
GO:0033619	0.0833225	1.85837	4.54486	8	75	membrane protein proteolysis	25.8418	0.286973
GO:0006040	0.0847387	2.28663	2.36333	5	39	amino sugar metabolic process	59.7304	0.290602
GO:0021772	0.0847387	2.28663	2.36333	5	39	olfactory bulb development	59.7304	0.290602
GO:0014904	0.0847387	2.28663	2.36333	5	39	myotube cell development	59.7304	0.290602
GO:0002700	0.0851965	1.71116	6.12042	10	101	regulation of production of molecular mediator of immune response	17.812	0.291756
GO:0007566	0.085647	1.94486	3.81769	7	63	embryo implantation	32.0459	0.292465
GO:0014009	0.085647	1.94486	3.81769	7	63	glial cell proliferation	32.0459	0.292465
GO:0006638	0.0860099	1.58256	8.54434	13	141	neutral lipid metabolic process	11.8812	0.293288
GO:0007030	0.0876253	1.54744	9.39272	14	155	Golgi organization	10.5881	0.298373
GO:0016126	0.0895914	1.75125	5.39324	9	89	sterol biosynthetic process	20.6451	0.304636
GO:0032602	0.0914155	1.91061	3.87828	7	64	chemokine production	31.0522	0.3104
GO:0023051	0.0921599	1.11182	223.668	241	3691	regulation of signaling	0.321428	0.310659
GO:1901698	0.0922606	1.1772	75.6871	87	1249	response to nitrogen compound	1.01333	0.310659
GO:0009069	0.0922673	2.22114	2.42393	5	40	serine family amino acid metabolic process	56.7812	0.310659
GO:1900027	0.0922673	2.22114	2.42393	5	40	regulation of ruffle assembly	56.7812	0.310659
GO:2000406	0.0922673	2.22114	2.42393	5	40	positive regulation of T cell migration	56.7812	0.310659
GO:0034377	0.0922673	2.22114	2.42393	5	40	plasma lipoprotein particle assembly	56.7812	0.310659
GO:0051648	0.0930278	1.38074	17.1493	23	283	vesicle localization	5.21807	0.311794
GO:0071354	0.0930924	2.02864	3.15111	6	52	cellular response to interleukin-6	40.318	0.311794
GO:0002381	0.0930924	2.02864	3.15111	6	52	immunoglobulin production involved in immunoglobulin-mediated immune response	40.318	0.311794
GO:0001824	0.093123	1.63149	7.02939	11	116	blastocyst development	14.8536	0.311794
GO:0006464	0.0942645	1.10673	250.21	268	4129	cellular protein modification process	0.285627	0.314739
GO:0036211	0.0942645	1.10673	250.21	268	4129	protein modification process	0.285627	0.314739
GO:2000106	0.0945002	1.72951	5.45384	9	90	regulation of leukocyte apoptotic process	20.1889	0.315088
GO:0071396	0.094675	1.2512	36.8437	45	608	cellular response to lipid	2.21187	0.315234
GO:0045765	0.0961693	1.3552	18.9672	25	313	regulation of angiogenesis	4.63667	0.319744
GO:0007188	0.0962957	1.45633	12.059	17	199	adenylate cyclase-modulating G protein-coupled receptor signaling pathway	7.80006	0.319744
GO:0070228	0.0973964	1.87754	3.93888	7	65	regulation of lymphocyte apoptotic process	30.1041	0.322953
GO:0022600	0.0995626	1.70829	5.51443	9	91	digestive system process	19.7476	0.329681
GO:0042304	0.100127	2.1593	2.48453	5	41	regulation of fatty acid biosynthetic process	54.0452	0.331094
GO:0042157	0.101432	1.53418	8.78674	13	145	lipoprotein metabolic process	11.2347	0.334948
GO:0048771	0.103045	1.44029	12.1802	17	201	tissue remodeling	7.6456	0.339809
GO:0009628	0.10358	1.16221	81.8681	93	1351	response to abiotic stimulus	0.925821	0.340311
GO:0050922	0.103588	1.84559	3.99948	7	66	negative regulation of chemotaxis	29.1988	0.340311
GO:0046916	0.103684	1.63866	6.36281	10	105	cellular transition metal ion homeostasis	16.4807	0.340311
GO:0006631	0.103764	1.30527	23.5727	30	389	fatty acid metabolic process	3.60228	0.340311
GO:1900542	0.104115	1.55739	7.99896	12	132	regulation of purine nucleotide metabolic process	12.5138	0.340999
GO:1905897	0.10492	1.75319	4.78726	8	79	regulation of response to endoplasmic reticulum stress	23.2911	0.343167
GO:0090150	0.105539	1.30893	22.7243	29	375	establishment of protein localization to membrane	3.74706	0.344723
GO:0046890	0.106527	1.43241	12.2408	17	202	regulation of lipid biosynthetic process	7.57009	0.347126
GO:0050864	0.106564	1.58584	7.21118	11	119	regulation of B cell activation	14.1141	0.347126
GO:1901342	0.106962	1.33626	19.2096	25	317	regulation of vasculature development	4.5204	0.347484
GO:0016601	0.106963	1.94384	3.2723	6	54	Rac protein signal transduction	37.3868	0.347484
GO:0090207	0.10831	2.10079	2.54512	5	42	regulation of triglyceride metabolic process	51.5023	0.349499
GO:0046949	0.10831	2.10079	2.54512	5	42	fatty-acyl-CoA biosynthetic process	51.5023	0.349499
GO:0032309	0.10831	2.10079	2.54512	5	42	icosanoid secretion	51.5023	0.349499
GO:0000413	0.10831	2.10079	2.54512	5	42	protein peptidyl-prolyl isomerization	51.5023	0.349499
GO:0051125	0.10831	2.10079	2.54512	5	42	regulation of actin nucleation	51.5023	0.349499
GO:0046365	0.109986	1.8147	4.06008	7	67	monosaccharide catabolic process	28.3337	0.354434
GO:0120162	0.110145	1.66739	5.63563	9	93	positive regulation of cold-induced thermogenesis	18.9074	0.354469
GO:0044265	0.110424	1.16164	77.4445	88	1278	cellular macromolecule catabolic process	0.978985	0.354893
GO:0070227	0.110762	1.72872	4.84785	8	80	lymphocyte apoptotic process	22.7125	0.355028
GO:0014015	0.110762	1.72872	4.84785	8	80	positive regulation of gliogenesis	22.7125	0.355028
GO:0009581	0.111282	1.57118	7.27178	11	120	detection of external stimulus	13.8799	0.355749
GO:0098739	0.111282	1.57118	7.27178	11	120	import across plasma membrane	13.8799	0.355749
GO:0061136	0.113706	1.41689	12.362	17	204	regulation of proteasomal protein catabolic process	7.42239	0.363015
GO:0070741	0.114276	1.90404	3.3329	6	55	response to interleukin-6	36.0397	0.363866
GO:2000404	0.114276	1.90404	3.3329	6	55	regulation of T cell migration	36.0397	0.363866
GO:0010948	0.115353	1.30088	22.0577	28	364	negative regulation of cell cycle process	3.83981	0.366495
GO:0043254	0.115406	1.24321	32.9048	40	543	regulation of protein-containing complex assembly	2.46499	0.366495
GO:0045833	0.115663	1.64766	5.69623	9	94	negative regulation of lipid metabolic process	18.5072	0.366825
GO:0052548	0.116537	1.28688	23.8757	30	394	regulation of endopeptidase activity	3.51143	0.368028
GO:0014002	0.116808	2.04536	2.60572	5	43	astrocyte development	49.1347	0.368028
GO:1903955	0.116808	2.04536	2.60572	5	43	positive regulation of protein targeting to mitochondrion	49.1347	0.368028
GO:0021988	0.116808	2.04536	2.60572	5	43	olfactory lobe development	49.1347	0.368028
GO:0030890	0.116808	2.04536	2.60572	5	43	positive regulation of B cell proliferation	49.1347	0.368028
GO:0000086	0.117388	1.32777	18.543	24	306	G2/M transition of mitotic cell cycle	4.65718	0.369371
GO:0006140	0.11761	1.51909	8.18075	12	135	regulation of nucleotide metabolic process	11.9638	0.369588
GO:0045639	0.118954	1.58816	6.5446	10	108	positive regulation of myeloid cell differentiation	15.5778	0.372837
GO:0045921	0.118954	1.58816	6.5446	10	108	positive regulation of exocytosis	15.5778	0.372837
GO:0001818	0.120106	1.38889	13.3316	18	220	negative regulation of cytokine production	6.75744	0.375958
GO:0098662	0.120403	1.20923	42.2369	50	697	inorganic cation transmembrane transport	1.87008	0.376398
GO:0032787	0.120925	1.21111	41.328	49	682	monocarboxylic acid metabolic process	1.91418	0.377023
GO:0009582	0.121074	1.54265	7.39298	11	122	detection of abiotic stimulus	13.4285	0.377023
GO:0030838	0.121074	1.54265	7.39298	11	122	positive regulation of actin filament polymerization	13.4285	0.377023
GO:0042743	0.121834	1.86583	3.3935	6	56	hydrogen peroxide metabolic process	34.764	0.378409
GO:0050999	0.121834	1.86583	3.3935	6	56	regulation of nitric-oxide synthase activity	34.764	0.378409
GO:0045471	0.122321	1.50673	8.24135	12	136	response to ethanol	11.7885	0.379433
GO:1901800	0.124308	1.57201	6.6052	10	109	positive regulation of proteasomal protein catabolic process	15.2933	0.385097
GO:0051480	0.125379	1.30022	20.4822	26	338	regulation of cytosolic calcium ion concentration	4.13518	0.386643
GO:1905521	0.125611	1.99278	2.66632	5	44	regulation of macrophage migration	46.9267	0.386643
GO:0061756	0.125611	1.99278	2.66632	5	44	leukocyte adhesion to vascular endothelial cell	46.9267	0.386643
GO:0065005	0.125611	1.99278	2.66632	5	44	protein-lipid complex assembly	46.9267	0.386643
GO:0045143	0.125611	1.99278	2.66632	5	44	homologous chromosome segregation	46.9267	0.386643
GO:1902533	0.126093	1.16716	62.9615	72	1039	positive regulation of intracellular signal transduction	1.21187	0.387302
GO:0032388	0.126147	1.3419	16.0585	21	265	positive regulation of intracellular transport	5.43354	0.387302
GO:0010646	0.127046	1.09632	221.123	236	3649	regulation of cell communication	0.322047	0.389368
GO:0048708	0.127144	1.60956	5.81743	9	96	astrocyte differentiation	17.7441	0.389368
GO:0043954	0.129319	1.65922	5.02965	8	83	cellular component maintenance	21.1003	0.395524
GO:0060324	0.129632	1.82912	3.4541	6	57	face development	33.5549	0.39596
GO:0043470	0.12979	1.55618	6.6658	10	110	regulation of carbohydrate catabolic process	15.0165	0.39596
GO:1902105	0.130995	1.32444	17.0281	22	281	regulation of leukocyte differentiation	5.0625	0.398975
GO:0043524	0.131111	1.41598	10.9077	15	180	negative regulation of neuron apoptotic process	8.41204	0.398975
GO:0007155	0.131385	1.13465	94.4726	105	1559	cell adhesion	0.784968	0.399303
GO:0006096	0.132058	1.48261	8.36255	12	138	glycolytic process	11.4493	0.400337
GO:0006757	0.132058	1.48261	8.36255	12	138	ATP generation from ADP	11.4493	0.400337
GO:0046330	0.133104	1.59116	5.87802	9	97	positive regulation of JNK cascade	17.3802	0.402999
GO:0032956	0.133348	1.25516	26.0572	32	430	regulation of actin cytoskeleton organization	3.14462	0.403231
GO:0032496	0.133957	1.29548	19.755	25	326	response to lipopolysaccharide	4.27425	0.404358
GO:0023056	0.134057	1.1219	114.712	126	1893	positive regulation of signaling	0.638887	0.404358
GO:0009395	0.134709	1.94283	2.72692	5	45	phospholipid catabolic process	44.8642	0.405814
GO:0071887	0.135401	1.54067	6.7264	10	111	leukocyte apoptotic process	14.7472	0.40739
GO:0051668	0.13584	1.63728	5.09025	8	84	localization within membrane	20.6009	0.4082
GO:1901568	0.137595	1.70081	4.30247	7	71	fatty acid derivative metabolic process	25.2311	0.412131
GO:0002886	0.137663	1.79382	3.51469	6	58	regulation of myeloid leukocyte mediated immunity	32.4078	0.412131
GO:0033628	0.137663	1.79382	3.51469	6	58	regulation of cell adhesion mediated by integrin	32.4078	0.412131
GO:0140029	0.139207	1.57317	5.93862	9	98	exocytic process	17.0273	0.416048
GO:0043604	0.139317	1.17075	53.993	62	891	amide biosynthetic process	1.41903	0.416048
GO:0006575	0.139876	1.39883	11.0289	15	182	cellular modified amino acid metabolic process	8.22817	0.416681
GO:0030168	0.139876	1.39883	11.0289	15	182	platelet activation	8.22817	0.416681
GO:1903530	0.140366	1.20037	39.0858	46	645	regulation of secretion by cell	2.00906	0.417625
GO:0031647	0.140992	1.27926	20.7852	26	343	regulation of protein stability	4.0155	0.418808
GO:0042158	0.141139	1.52546	6.787	10	112	lipoprotein biosynthetic process	14.485	0.418808
GO:0051345	0.141287	1.1723	52.175	60	861	positive regulation of hydrolase activity	1.47062	0.418808
GO:0032434	0.141815	1.43535	9.33212	13	154	regulation of proteasomal ubiquitin-dependent protein catabolic process	9.95994	0.419857
GO:1903052	0.142047	1.48858	7.63537	11	126	positive regulation of proteolysis involved in cellular protein catabolic process	12.5894	0.420026
GO:0043603	0.1423	1.14729	71.0817	80	1173	cellular amide metabolic process	1.05645	0.420257
GO:0045216	0.143982	1.3145	16.3615	21	270	cell-cell junction organization	5.23416	0.423464
GO:0046461	0.144091	1.89531	2.78752	5	46	neutral lipid catabolic process	42.9348	0.423464
GO:0046464	0.144091	1.89531	2.78752	5	46	acylglycerol catabolic process	42.9348	0.423464
GO:0043094	0.144091	1.89531	2.78752	5	46	cellular metabolic compound salvage	42.9348	0.423464
GO:0043062	0.144874	1.24678	25.3906	31	419	extracellular structure organization	3.2084	0.424266
GO:0030198	0.144874	1.24678	25.3906	31	419	extracellular matrix organization	3.2084	0.424266
GO:0051046	0.144999	1.18947	41.9945	49	693	regulation of secretion	1.85389	0.424266
GO:0022610	0.145069	1.12689	95.0179	105	1568	biological adhesion	0.775983	0.424266
GO:1905515	0.14592	1.75985	3.57529	6	59	non-motile cilium assembly	31.3186	0.424688
GO:1903556	0.14592	1.75985	3.57529	6	59	negative regulation of tumor necrosis factor superfamily cytokine production	31.3186	0.424688
GO:2000242	0.14592	1.75985	3.57529	6	59	negative regulation of reproductive process	31.3186	0.424688
GO:0034381	0.14592	1.75985	3.57529	6	59	plasma lipoprotein particle clearance	31.3186	0.424688
GO:0060249	0.146331	1.22453	29.9961	36	495	anatomical structure homeostasis	2.66961	0.424871
GO:0009057	0.146337	1.12679	94.109	104	1553	macromolecule catabolic process	0.783511	0.424871
GO:0006165	0.146776	1.42514	9.39272	13	155	nucleoside diphosphate phosphorylation	9.83184	0.425634
GO:0006401	0.147676	1.23915	26.3602	32	435	RNA catabolic process	3.07274	0.427726
GO:0042113	0.148984	1.32749	14.6648	19	242	B cell activation	5.89492	0.430995
GO:0098655	0.149582	1.17251	48.6603	56	803	cation transmembrane transport	1.57802	0.432205
GO:0045229	0.150891	1.24021	25.5118	31	421	external encapsulating structure organization	3.17799	0.435464
GO:0002702	0.152552	1.64904	4.42367	7	73	positive regulation of production of molecular mediator of immune response	23.8675	0.439731
GO:0070588	0.153643	1.27693	19.2096	24	317	calcium ion transmembrane transport	4.33958	0.442346
GO:0090316	0.153838	1.34402	12.968	17	214	positive regulation of intracellular protein transport	6.74491	0.442376
GO:0002718	0.154397	1.72714	3.63589	6	60	regulation of cytokine production involved in immune response	30.2833	0.443453
GO:0043627	0.15637	1.57477	5.27204	8	87	response to estrogen	19.2047	0.448049
GO:0034103	0.15637	1.57477	5.27204	8	87	regulation of tissue remodeling	19.2047	0.448049
GO:0046939	0.156973	1.40515	9.51391	13	157	nucleotide phosphorylation	9.58294	0.448707
GO:0002440	0.156973	1.40515	9.51391	13	157	production of molecular mediator of immune response	9.58294	0.448707
GO:0016052	0.158231	1.33714	13.0286	17	215	carbohydrate catabolic process	6.68231	0.451765
GO:0060548	0.161069	1.14454	63.1433	71	1042	negative regulation of cell death	1.18817	0.459325
GO:1903792	0.16269	1.33033	13.0892	17	216	negative regulation of anion transport	6.62058	0.463397
GO:0050688	0.163085	1.69562	3.69649	6	61	regulation of defense response to virus	29.2986	0.463973
GO:0042475	0.163523	1.55498	5.33264	8	88	odontogenesis of dentin-containing tooth	18.7707	0.464668
GO:0051049	0.164125	1.10968	110.167	120	1818	regulation of transport	0.659703	0.465828
GO:0044087	0.16488	1.1363	68.9607	77	1138	regulation of cellular component biogenesis	1.08034	0.46742
GO:0051336	0.165717	1.12471	82.3529	91	1359	regulation of hydrolase activity	0.895277	0.469238
GO:0030856	0.167527	1.38571	9.63511	13	159	regulation of epithelial cell differentiation	9.34338	0.473805
GO:0044839	0.168245	1.25938	19.452	24	321	cell cycle G2/M phase transition	4.2321	0.475278
GO:0120032	0.168648	1.3099	14.0588	18	232	regulation of plasma membrane bounded cell projection assembly	6.07647	0.475858
GO:0010466	0.170146	1.33209	12.3014	16	203	negative regulation of peptidase activity	7.05477	0.479521
GO:0043491	0.170618	1.28734	15.8767	20	262	protein kinase B signaling	5.29398	0.480286
GO:0010647	0.170952	1.10492	114.288	124	1886	positive regulation of cell communication	0.633422	0.480664
GO:0071260	0.171787	1.48897	6.24161	9	103	cellular response to mechanical stimulus	15.4143	0.481297
GO:0007204	0.17191	1.26192	18.6036	23	307	positive regulation of cytosolic calcium ion concentration	4.43411	0.481297
GO:0042398	0.171978	1.66523	3.75709	6	62	cellular modified amino acid biosynthetic process	28.3611	0.481297
GO:0019320	0.171978	1.66523	3.75709	6	62	hexose catabolic process	28.3611	0.481297
GO:0051896	0.173106	1.30372	14.1194	18	233	regulation of protein kinase B signaling	6.02442	0.482524
GO:0071715	0.173821	1.76572	2.96931	5	49	icosanoid transport	37.8384	0.482524
GO:0002204	0.173821	1.76572	2.96931	5	49	somatic recombination of immunoglobulin genes involved in immune response	37.8384	0.482524
GO:0002208	0.173821	1.76572	2.96931	5	49	somatic diversification of immunoglobulins involved in immune response	37.8384	0.482524
GO:0009593	0.173821	1.76572	2.96931	5	49	detection of chemical stimulus	37.8384	0.482524
GO:0007520	0.173821	1.76572	2.96931	5	49	myoblast fusion	37.8384	0.482524
GO:0045190	0.173821	1.76572	2.96931	5	49	isotype switching	37.8384	0.482524
GO:0009260	0.174949	1.32491	12.362	16	204	ribonucleotide biosynthetic process	6.98577	0.484809
GO:0051208	0.175048	1.39332	8.84733	12	146	sequestering of calcium ion	10.2289	0.484809
GO:0032874	0.176819	1.41417	7.99896	11	132	positive regulation of stress-activated MAPK cascade	11.471	0.489151
GO:0070374	0.178053	1.33413	11.5137	15	190	positive regulation of ERK1 and ERK2 cascade	7.54986	0.492
GO:0009185	0.178428	1.36679	9.75631	13	161	ribonucleoside diphosphate metabolic process	9.11269	0.492073
GO:0017157	0.178489	1.28645	15.0889	19	249	regulation of exocytosis	5.56814	0.492073
GO:0048661	0.178696	1.47319	6.30221	9	104	positive regulation of smooth muscle cell proliferation	15.1193	0.492079
GO:0009987	0.180753	1.22845	900.61	906	14862	cellular process	0.0745296	0.496895
GO:0010883	0.181065	1.6359	3.81769	6	63	regulation of lipid storage	27.4679	0.496895
GO:0045123	0.181065	1.6359	3.81769	6	63	cellular extravasation	27.4679	0.496895
GO:0030183	0.182978	1.40248	8.05956	11	133	B cell differentiation	11.2991	0.501573
GO:0099172	0.184217	1.72636	3.02991	5	50	presynapse organization	36.34	0.503819
GO:2000514	0.184217	1.72636	3.02991	5	50	regulation of CD4-positive, alpha-beta T cell activation	36.34	0.503819
GO:0002312	0.184576	1.55438	4.66606	7	77	B cell activation involved in immune response	21.4522	0.503981
GO:0006402	0.184695	1.2152	24.2999	29	401	mRNA catabolic process	3.27691	0.503981
GO:0009132	0.186456	1.33653	10.7259	14	177	nucleoside diphosphate metabolic process	8.11963	0.505879
GO:1903305	0.186456	1.33653	10.7259	14	177	regulation of regulated secretory pathway	8.11963	0.505879
GO:0019216	0.186516	1.20525	26.1784	31	432	regulation of lipid metabolic process	3.01821	0.505879
GO:0046031	0.18675	1.37263	8.96853	12	148	ADP metabolic process	9.95435	0.505879
GO:0097696	0.18675	1.37263	8.96853	12	148	receptor signaling pathway via STAT	9.95435	0.505879
GO:0060491	0.186839	1.28551	14.3012	18	236	regulation of cell projection assembly	5.87223	0.505879
GO:0032970	0.186864	1.19419	28.9659	34	478	regulation of actin filament-based process	2.70382	0.505879
GO:0120034	0.189236	1.39099	8.12016	11	134	positive regulation of plasma membrane bounded cell projection assembly	11.1311	0.510686
GO:0070304	0.189236	1.39099	8.12016	11	134	positive regulation of stress-activated protein kinase signaling cascade	11.1311	0.510686
GO:0061077	0.190339	1.60758	3.87828	6	64	chaperone-mediated protein folding	26.6162	0.510686
GO:0050830	0.190339	1.60758	3.87828	6	64	defense response to Gram-positive bacterium	26.6162	0.510686
GO:0032945	0.190339	1.60758	3.87828	6	64	negative regulation of mononuclear cell proliferation	26.6162	0.510686
GO:1903307	0.190339	1.60758	3.87828	6	64	positive regulation of regulated secretory pathway	26.6162	0.510686
GO:0010518	0.190339	1.60758	3.87828	6	64	positive regulation of phospholipase activity	26.6162	0.510686
GO:0045010	0.190339	1.60758	3.87828	6	64	actin nucleation	26.6162	0.510686
GO:1901987	0.192239	1.18652	29.9961	35	495	regulation of cell cycle phase transition	2.59545	0.514919
GO:0006497	0.192881	1.44262	6.42341	9	106	protein lipidation	14.5541	0.514919
GO:0050905	0.192881	1.44262	6.42341	9	106	neuromuscular process	14.5541	0.514919
GO:0050793	0.192892	1.0828	160.828	171	2654	regulation of developmental process	0.441112	0.514919
GO:0002367	0.192988	1.53238	4.72666	7	78	cytokine production involved in immune response	20.9057	0.514919
GO:0006816	0.19344	1.1991	26.2996	31	434	calcium ion transport	2.99045	0.515355
GO:0032436	0.19358	1.48052	5.57503	8	92	positive regulation of proteasomal ubiquitin-dependent protein catabolic process	17.1739	0.515355
GO:0071827	0.194833	1.68871	3.09051	5	51	plasma lipoprotein particle organization	34.9289	0.516975
GO:0002711	0.194833	1.68871	3.09051	5	51	positive regulation of T cell mediated immunity	34.9289	0.516975
GO:0035337	0.194833	1.68871	3.09051	5	51	fatty-acyl-CoA metabolic process	34.9289	0.516975
GO:0045619	0.195406	1.33936	9.9381	13	164	regulation of lymphocyte differentiation	8.78235	0.517839
GO:0042476	0.19559	1.37967	8.18075	11	135	odontogenesis	10.9668	0.517839
GO:0006812	0.197027	1.12121	67.0216	74	1106	cation transport	1.0992	0.521069
GO:0034754	0.198116	1.40089	7.33238	10	121	cellular hormone metabolic process	12.4104	0.522801
GO:1903008	0.198116	1.40089	7.33238	10	121	organelle disassembly	12.4104	0.522801
GO:0001895	0.199791	1.58022	3.93888	6	65	retina homeostasis	25.8036	0.525857
GO:0051353	0.199791	1.58022	3.93888	6	65	positive regulation of oxidoreductase activity	25.8036	0.525857
GO:0060191	0.200149	1.4278	6.48401	9	107	regulation of lipase activity	14.2833	0.525857
GO:0019915	0.200149	1.4278	6.48401	9	107	lipid storage	14.2833	0.525857
GO:0099518	0.201432	1.463	5.63563	8	93	vesicle cytoskeletal trafficking	16.8066	0.528381
GO:0060193	0.20155	1.51099	4.78726	7	79	positive regulation of lipase activity	20.3797	0.528381
GO:0045580	0.202037	1.36854	8.24135	11	136	regulation of T cell differentiation	10.8061	0.528507
GO:0002761	0.202037	1.36854	8.24135	11	136	regulation of myeloid leukocyte differentiation	10.8061	0.528507
GO:0060341	0.203331	1.12727	57.6289	64	951	regulation of cellular localization	1.2858	0.531312
GO:0060429	0.204181	1.11219	73.9298	81	1220	epithelium development	0.988827	0.532878
GO:0030155	0.204373	1.1374	49.0845	55	810	regulation of cell adhesion	1.52317	0.532878
GO:0034440	0.204995	1.38829	7.39298	10	122	lipid oxidation	12.2077	0.53392
GO:0098660	0.205279	1.13964	47.206	53	779	inorganic ion transmembrane transport	1.58692	0.534082
GO:0035722	0.205657	1.65267	3.15111	5	52	interleukin-12-mediated signaling pathway	33.5984	0.534126
GO:0051495	0.205819	1.24544	16.3615	20	270	positive regulation of cytoskeleton organization	4.98491	0.534126
GO:1903050	0.205963	1.26199	14.5436	18	240	regulation of proteolysis involved in cellular protein catabolic process	5.67812	0.534126
GO:0001959	0.207123	1.32166	10.0593	13	166	regulation of cytokine-mediated signaling pathway	8.572	0.535978
GO:0003158	0.207123	1.32166	10.0593	13	166	endothelium development	8.572	0.535978
GO:2000060	0.207531	1.41328	6.5446	9	108	positive regulation of ubiquitin-dependent protein catabolic process	14.0201	0.536456
GO:0001525	0.208608	1.15444	37.8133	43	624	angiogenesis	2.00657	0.53866
GO:0045621	0.209411	1.44589	5.69623	8	94	positive regulation of lymphocyte differentiation	16.4509	0.539866
GO:0043066	0.209542	1.12598	55.8715	62	922	negative regulation of apoptotic process	1.32521	0.539866
GO:0010951	0.209748	1.28937	11.8772	15	196	negative regulation of endopeptidase activity	7.0947	0.539866
GO:0042632	0.210255	1.49019	4.84785	7	80	cholesterol homeostasis	19.8734	0.540015
GO:0006446	0.210255	1.49019	4.84785	7	80	regulation of translational initiation	19.8734	0.540015
GO:1905039	0.211204	1.33304	9.21092	12	152	carboxylic acid transmembrane transport	9.43733	0.541294
GO:1903825	0.211204	1.33304	9.21092	12	152	organic acid transmembrane transport	9.43733	0.541294
GO:1903362	0.21453	1.22901	17.3917	21	287	regulation of cellular protein catabolic process	4.63245	0.549234
GO:0046390	0.215748	1.27012	12.8468	16	212	ribose phosphate biosynthetic process	6.46849	0.550448
GO:0035556	0.216326	1.072	178.401	188	2944	intracellular signal transduction	0.394128	0.550448
GO:1903706	0.216487	1.18328	25.7542	30	425	regulation of hemopoiesis	3.01785	0.550448
GO:0071349	0.216673	1.61812	3.2117	5	53	cellular response to interleukin-12	32.3425	0.550448
GO:0006904	0.216673	1.61812	3.2117	5	53	vesicle docking involved in exocytosis	32.3425	0.550448
GO:0014075	0.216673	1.61812	3.2117	5	53	response to amine	32.3425	0.550448
GO:0043271	0.217332	1.21392	19.2702	23	318	negative regulation of ion transport	4.13265	0.550448
GO:0007200	0.21751	1.42917	5.75683	8	95	phospholipase C-activating G protein-coupled receptor signaling pathway	16.1064	0.550448
GO:1902107	0.217523	1.3235	9.27152	12	153	positive regulation of leukocyte differentiation	9.31437	0.550448
GO:1903708	0.217523	1.3235	9.27152	12	153	positive regulation of hemopoiesis	9.31437	0.550448
GO:0030518	0.217523	1.3235	9.27152	12	153	intracellular steroid hormone receptor signaling pathway	9.31437	0.550448
GO:0043069	0.217765	1.12049	57.0229	63	941	negative regulation of programmed cell death	1.29276	0.55048
GO:0032418	0.219098	1.46995	4.90845	7	81	lysosome localization	19.3858	0.550611
GO:0017156	0.219098	1.46995	4.90845	7	81	calcium-ion regulated exocytosis	19.3858	0.550611
GO:0055092	0.219098	1.46995	4.90845	7	81	sterol homeostasis	19.3858	0.550611
GO:0032456	0.219191	1.5282	4.06008	6	67	endocytic recycling	24.286	0.550611
GO:0032768	0.219191	1.5282	4.06008	6	67	regulation of monooxygenase activity	24.286	0.550611
GO:0070664	0.219191	1.5282	4.06008	6	67	negative regulation of leukocyte proliferation	24.286	0.550611
GO:0008064	0.221124	1.25361	13.8164	17	228	regulation of actin polymerization or depolymerization	5.94202	0.554886
GO:0031532	0.221917	1.33618	8.42315	11	139	actin cytoskeleton reorganization	10.3447	0.555718
GO:1903578	0.221917	1.33618	8.42315	11	139	regulation of ATP metabolic process	10.3447	0.555718
GO:0006518	0.225386	1.12173	52.4174	58	865	peptide metabolic process	1.40848	0.563817
GO:2000058	0.22608	1.28087	11.1501	14	184	regulation of ubiquitin-dependent protein catabolic process	7.51359	0.564927
GO:0031294	0.227868	1.58499	3.2723	5	54	lymphocyte costimulation	31.1557	0.564927
GO:0031295	0.227868	1.58499	3.2723	5	54	T cell costimulation	31.1557	0.564927
GO:1902808	0.227868	1.58499	3.2723	5	54	positive regulation of cell cycle G1/S phase transition	31.1557	0.564927
GO:0070671	0.227868	1.58499	3.2723	5	54	response to interleukin-12	31.1557	0.564927
GO:1900026	0.227868	1.58499	3.2723	5	54	positive regulation of substrate adhesion-dependent cell spreading	31.1557	0.564927
GO:2000191	0.227868	1.58499	3.2723	5	54	regulation of fatty acid transport	31.1557	0.564927
GO:0051051	0.227929	1.17411	25.936	30	428	negative regulation of transport	2.9757	0.564927
GO:0046579	0.228071	1.45025	4.96905	7	82	positive regulation of Ras protein signal transduction	18.9158	0.564927
GO:0055088	0.228714	1.32573	8.48375	11	140	lipid homeostasis	10.1974	0.564927
GO:0045646	0.22912	1.50345	4.12068	6	68	regulation of erythrocyte differentiation	23.577	0.564927
GO:0002562	0.22912	1.50345	4.12068	6	68	somatic diversification of immune receptors via germline recombination within a single locus	23.577	0.564927
GO:0016444	0.22912	1.50345	4.12068	6	68	somatic cell DNA recombination	23.577	0.564927
GO:0050848	0.22912	1.50345	4.12068	6	68	regulation of calcium-mediated signaling	23.577	0.564927
GO:0046467	0.231448	1.28763	10.3017	13	170	membrane lipid biosynthetic process	8.17336	0.569482
GO:2001056	0.231448	1.28763	10.3017	13	170	positive regulation of cysteine-type endopeptidase activity	8.17336	0.569482
GO:0030832	0.231678	1.24167	13.9376	17	230	regulation of actin filament length	5.83913	0.569482
GO:0072330	0.23206	1.25071	13.0286	16	215	monocarboxylic acid biosynthetic process	6.28924	0.569838
GO:0030031	0.232617	1.13533	40.1766	45	663	cell projection assembly	1.86012	0.570623
GO:0043412	0.23463	1.05808	261.905	272	4322	macromolecule modification	0.264578	0.574974
GO:0061024	0.236861	1.10884	59.3862	65	980	membrane organization	1.22975	0.579459
GO:1903364	0.236942	1.29565	9.45332	12	156	positive regulation of cellular protein catabolic process	8.95957	0.579459
GO:0042445	0.237952	1.25427	12.1802	15	201	hormone metabolic process	6.74612	0.580885
GO:0006865	0.238008	1.2658	11.2713	14	186	amino acid transport	7.35287	0.580885
GO:0043406	0.239218	1.21092	16.7857	20	277	positive regulation of MAP kinase activity	4.73615	0.582088
GO:0071825	0.239228	1.55318	3.3329	5	55	protein-lipid complex subunit organization	30.0331	0.582088
GO:0002762	0.239228	1.55318	3.3329	5	55	negative regulation of myeloid leukocyte differentiation	30.0331	0.582088
GO:0006898	0.241232	1.19713	18.6642	22	308	receptor-mediated endocytosis	4.21382	0.585778
GO:0070371	0.241232	1.19713	18.6642	22	308	ERK1 and ERK2 cascade	4.21382	0.585778
GO:0062014	0.242481	1.38124	5.93862	8	98	negative regulation of small molecule metabolic process	15.1354	0.587784
GO:0015748	0.242546	1.30531	8.60494	11	142	organophosphate ester transport	9.91222	0.587784
GO:0044248	0.24311	1.06878	149.98	158	2475	cellular catabolic process	0.468664	0.588555
GO:0007265	0.244977	1.15242	29.0265	33	479	Ras protein signal transduction	2.61335	0.59248
GO:0043547	0.245454	1.15768	27.148	31	448	positive regulation of GTPase activity	2.80647	0.592885
GO:0006626	0.245987	1.34486	6.84759	9	113	protein targeting to mitochondrion	12.8068	0.592885
GO:0051341	0.245987	1.34486	6.84759	9	113	regulation of oxidoreductase activity	12.8068	0.592885
GO:0046634	0.246378	1.41238	5.09025	7	84	regulation of alpha-beta T cell activation	18.0258	0.592885
GO:0002377	0.246378	1.41238	5.09025	7	84	immunoglobulin production	18.0258	0.592885
GO:0046631	0.248234	1.31714	7.75657	10	128	alpha-beta T cell activation	11.0901	0.595036
GO:0071616	0.249388	1.45626	4.24187	6	70	acyl-CoA biosynthetic process	22.249	0.595036
GO:0042698	0.249388	1.45626	4.24187	6	70	ovulation cycle	22.249	0.595036
GO:0042982	0.249388	1.45626	4.24187	6	70	amyloid precursor protein metabolic process	22.249	0.595036
GO:0035384	0.249388	1.45626	4.24187	6	70	thioester biosynthetic process	22.249	0.595036
GO:0032890	0.249388	1.45626	4.24187	6	70	regulation of organic acid transport	22.249	0.595036
GO:0007259	0.249576	1.29533	8.66554	11	143	receptor signaling pathway via JAK-STAT	9.77407	0.595036
GO:0051235	0.249862	1.16751	23.4515	27	387	maintenance of location	3.27564	0.595036
GO:0060759	0.250409	1.26322	10.4835	13	173	regulation of response to cytokine stimulus	7.89235	0.595036
GO:0001935	0.250409	1.26322	10.4835	13	173	endothelial cell proliferation	7.89235	0.595036
GO:0032273	0.250409	1.26322	10.4835	13	173	positive regulation of protein polymerization	7.89235	0.595036
GO:0032365	0.250737	1.52262	3.3935	5	56	intracellular lipid transport	28.97	0.595036
GO:0016447	0.250737	1.52262	3.3935	5	56	somatic recombination of immunoglobulin gene segments	28.97	0.595036
GO:0032720	0.250737	1.52262	3.3935	5	56	negative regulation of tumor necrosis factor production	28.97	0.595036
GO:0051094	0.252728	1.08518	84.898	91	1401	positive regulation of developmental process	0.842403	0.599169
GO:0032880	0.253383	1.0993	61.6889	67	1018	regulation of protein localization	1.17472	0.60013
GO:0046470	0.255698	1.39418	5.15085	7	85	phosphatidylcholine metabolic process	17.6042	0.604422
GO:1903747	0.255698	1.39418	5.15085	7	85	regulation of establishment of protein localization to mitochondrion	17.6042	0.604422
GO:0009179	0.256999	1.26894	9.63511	12	159	purine ribonucleoside diphosphate metabolic process	8.62466	0.605119
GO:0009135	0.256999	1.26894	9.63511	12	159	purine nucleoside diphosphate metabolic process	8.62466	0.605119
GO:0002285	0.256999	1.26894	9.63511	12	159	lymphocyte activation involved in immune response	8.62466	0.605119
GO:1990845	0.256999	1.26894	9.63511	12	159	adaptive thermogenesis	8.62466	0.605119
GO:0033993	0.258097	1.09949	58.9014	64	972	response to lipid	1.23084	0.607108
GO:0045687	0.262381	1.49324	3.4541	5	57	positive regulation of glial cell differentiation	27.9624	0.61525
GO:0072583	0.262381	1.49324	3.4541	5	57	clathrin-dependent endocytosis	27.9624	0.61525
GO:1905517	0.262381	1.49324	3.4541	5	57	macrophage migration	27.9624	0.61525
GO:0007266	0.262582	1.23668	11.5137	14	190	Rho protein signal transduction	7.04654	0.61525
GO:0062207	0.265119	1.37644	5.21144	7	86	regulation of pattern recognition receptor signaling pathway	17.1971	0.619535
GO:0033627	0.265119	1.37644	5.21144	7	86	cell adhesion mediated by integrin	17.1971	0.619535
GO:1901214	0.265184	1.15933	22.7243	26	375	regulation of neuron death	3.35943	0.619535
GO:0019439	0.266996	1.1183	38.904	43	642	aromatic compound catabolic process	1.89563	0.623163
GO:1902905	0.268321	1.19626	15.2707	18	252	positive regulation of supramolecular fiber organization	5.15023	0.625649
GO:0070372	0.269542	1.18279	17.1493	20	283	regulation of ERK1 and ERK2 cascade	4.53745	0.626377
GO:0006090	0.269922	1.23971	10.6653	13	176	pyruvate metabolic process	7.62558	0.626377
GO:1905952	0.269922	1.23971	10.6653	13	176	regulation of lipid localization	7.62558	0.626377
GO:0060135	0.270137	1.41194	4.36307	6	72	maternal process involved in female pregnancy	21.0301	0.626377
GO:0019395	0.270147	1.30688	7.02939	9	116	fatty acid oxidation	12.1529	0.626377
GO:0010952	0.270197	1.20157	14.3618	17	237	positive regulation of peptidase activity	5.4993	0.626377
GO:0042552	0.270692	1.25174	9.75631	12	161	myelination	8.41171	0.626921
GO:0050821	0.271987	1.20761	13.4528	16	222	protein stabilization	5.89887	0.628708
GO:0007254	0.271987	1.20761	13.4528	16	222	JNK cascade	5.89887	0.628708
GO:0050708	0.272517	1.16548	19.9974	23	330	regulation of protein secretion	3.83756	0.629328
GO:0060348	0.273814	1.19109	15.3313	18	253	bone development	5.10959	0.630067
GO:0043030	0.274147	1.46496	3.51469	5	58	regulation of macrophage activation	27.0065	0.630067
GO:0070192	0.274147	1.46496	3.51469	5	58	chromosome organization involved in meiotic cell cycle	27.0065	0.630067
GO:0030199	0.274147	1.46496	3.51469	5	58	collagen fibril organization	27.0065	0.630067
GO:0045332	0.274147	1.46496	3.51469	5	58	phospholipid translocation	27.0065	0.630067
GO:0009896	0.274423	1.12816	31.3899	35	518	positive regulation of catabolic process	2.37008	0.630098
GO:0001659	0.276538	1.23207	10.7259	13	177	temperature homeostasis	7.53966	0.634349
GO:0009615	0.277051	1.18187	16.3009	19	269	response to virus	4.77094	0.634919
GO:0051403	0.277472	1.17067	18.1795	21	300	stress-activated MAPK cascade	4.23967	0.635029
GO:1903531	0.277627	1.2433	9.81691	12	162	negative regulation of secretion by cell	8.30818	0.635029
GO:0060627	0.278869	1.11625	36.2377	40	598	regulation of vesicle-mediated transport	2.03242	0.637263
GO:0002009	0.279578	1.11425	37.2073	41	614	morphogenesis of an epithelium	1.97607	0.638276
GO:0045637	0.279958	1.1737	17.2705	20	285	regulation of myeloid cell differentiation	4.47399	0.638538
GO:1901215	0.284919	1.18087	15.4525	18	255	negative regulation of neuron death	5.02976	0.648061
GO:0007565	0.285963	1.20187	12.665	15	209	female pregnancy	6.23955	0.648061
GO:0030307	0.285963	1.20187	12.665	15	209	positive regulation of cell growth	6.23955	0.648061
GO:0006112	0.286015	1.30809	6.24161	8	103	energy reserve metabolic process	13.7016	0.648061
GO:0034204	0.28602	1.43773	3.57529	5	59	lipid translocation	26.0988	0.648061
GO:0031343	0.28602	1.43773	3.57529	5	59	positive regulation of cell killing	26.0988	0.648061
GO:0050435	0.28602	1.43773	3.57529	5	59	amyloid-beta metabolic process	26.0988	0.648061
GO:0055076	0.286461	1.26316	8.05956	10	133	transition metal ion homeostasis	10.2719	0.648226
GO:1903828	0.286632	1.28272	7.15059	9	118	negative regulation of cellular protein localization	11.7445	0.648226
GO:0010959	0.287871	1.17233	16.4221	19	271	regulation of metal ion transport	4.70078	0.649817
GO:0120031	0.287876	1.10673	39.2676	43	648	plasma membrane bounded cell projection assembly	1.86069	0.649817
GO:0043269	0.289221	1.07297	81.9287	87	1352	regulation of ion transport	0.86481	0.652239
GO:0045861	0.289971	1.15587	19.2702	22	318	negative regulation of proteolysis	3.95297	0.653318
GO:0007272	0.291661	1.22677	9.9381	12	164	ensheathment of neurons	8.10678	0.655895
GO:0008366	0.291661	1.22677	9.9381	12	164	axon ensheathment	8.10678	0.655895
GO:0006164	0.292178	1.19562	12.7256	15	210	purine nucleotide biosynthetic process	6.18027	0.656445
GO:0044283	0.293299	1.09769	44.1761	48	729	small molecule biosynthetic process	1.64112	0.657812
GO:0002064	0.293334	1.16761	16.4827	19	272	epithelial cell development	4.66628	0.657812
GO:1902882	0.294959	1.29437	6.30221	8	104	regulation of response to oxidative stress	13.4393	0.660248
GO:0014896	0.294975	1.27097	7.21118	9	119	muscle hypertrophy	11.5479	0.660248
GO:0051346	0.295244	1.13138	25.027	28	413	negative regulation of hydrolase activity	2.98272	0.660248
GO:0140253	0.297986	1.41149	3.63589	5	60	cell-cell fusion	25.2361	0.66391
GO:0050766	0.297986	1.41149	3.63589	5	60	positive regulation of phagocytosis	25.2361	0.66391
GO:0000768	0.297986	1.41149	3.63589	5	60	syncytium formation by plasma membrane fusion	25.2361	0.66391
GO:1903202	0.297986	1.41149	3.63589	5	60	negative regulation of oxidative stress-induced cell death	25.2361	0.66391
GO:1901990	0.298624	1.12164	27.9358	31	461	regulation of mitotic cell cycle phase transition	2.65042	0.664388
GO:0050680	0.298753	1.21867	9.9987	12	165	negative regulation of epithelial cell proliferation	8.00882	0.664388
GO:0120161	0.300617	1.2295	9.08973	11	150	regulation of cold-induced thermogenesis	8.88311	0.667091
GO:0106106	0.300617	1.2295	9.08973	11	150	cold-induced thermogenesis	8.88311	0.667091
GO:0098657	0.301003	1.19541	11.8772	14	196	import into cell	6.62172	0.667091
GO:0009895	0.301932	1.14266	20.361	23	336	negative regulation of catabolic process	3.70173	0.667091
GO:0070527	0.301988	1.35027	4.54486	6	75	platelet aggregation	19.3813	0.667091
GO:0045132	0.301988	1.35027	4.54486	6	75	meiotic chromosome segregation	19.3813	0.667091
GO:1990823	0.302199	1.24278	8.18075	10	135	response to leukemia inhibitory factor	9.96982	0.667091
GO:1990830	0.302199	1.24278	8.18075	10	135	cellular response to leukemia inhibitory factor	9.96982	0.667091
GO:1901361	0.302466	1.09771	40.4796	44	668	organic cyclic compound catabolic process	1.79166	0.667091
GO:0097306	0.303967	1.28094	6.36281	8	105	cellular response to alcohol	13.1846	0.669787
GO:0005975	0.305743	1.09726	39.5706	43	653	carbohydrate metabolic process	1.8323	0.673082
GO:0042127	0.306112	1.05979	103.865	109	1714	regulation of cell population proliferation	0.674155	0.673278
GO:0051606	0.307974	1.17294	13.8164	16	228	detection of stimulus	5.59249	0.676485
GO:0008277	0.308133	1.22063	9.15033	11	151	regulation of G protein-coupled receptor signaling pathway	8.76584	0.676485
GO:0008219	0.309401	1.05227	134.407	140	2218	cell death	0.517083	0.676585
GO:0006949	0.310031	1.38619	3.69649	5	61	syncytium formation	24.4155	0.676585
GO:0010332	0.310031	1.38619	3.69649	5	61	response to gamma radiation	24.4155	0.676585
GO:0030101	0.310031	1.38619	3.69649	5	61	natural killer cell activation	24.4155	0.676585
GO:0043500	0.310149	1.23283	8.24135	10	136	muscle adaptation	9.82375	0.676585
GO:0006720	0.310149	1.23283	8.24135	10	136	isoprenoid metabolic process	9.82375	0.676585
GO:0021782	0.310149	1.23283	8.24135	10	136	glial cell development	9.82375	0.676585
GO:0009062	0.311836	1.2481	7.33238	9	121	fatty acid catabolic process	11.1693	0.679558
GO:1900024	0.312759	1.33089	4.60546	6	76	regulation of substrate adhesion-dependent cell spreading	18.8747	0.679558
GO:0032092	0.313036	1.26778	6.42341	8	106	positive regulation of protein binding	12.937	0.679558
GO:0006576	0.313036	1.26778	6.42341	8	106	cellular biogenic amine metabolic process	12.937	0.679558
GO:0003333	0.31349	1.29405	5.51443	7	91	amino acid transmembrane transport	15.3593	0.679558
GO:0010827	0.31349	1.29405	5.51443	7	91	regulation of glucose transmembrane transport	15.3593	0.679558
GO:0051057	0.31349	1.29405	5.51443	7	91	positive regulation of small GTPase mediated signal transduction	15.3593	0.679558
GO:0046395	0.315509	1.14911	16.7251	19	276	carboxylic acid catabolic process	4.532	0.683319
GO:0007264	0.320434	1.08859	40.7826	44	673	small GTPase mediated signal transduction	1.76513	0.69336
GO:0046148	0.322141	1.36178	3.75709	5	62	pigment biosynthetic process	23.6342	0.695187
GO:0035065	0.322141	1.36178	3.75709	5	62	regulation of histone acetylation	23.6342	0.695187
GO:0015914	0.322158	1.25489	6.48401	8	107	phospholipid transport	12.6963	0.695187
GO:0051604	0.322932	1.13866	17.7553	20	293	protein maturation	4.23301	0.695187
GO:0006879	0.323592	1.31205	4.66606	6	77	cellular iron ion homeostasis	18.3876	0.695187
GO:0048278	0.323592	1.31205	4.66606	6	77	vesicle docking	18.3876	0.695187
GO:0010611	0.323592	1.31205	4.66606	6	77	regulation of cardiac muscle hypertrophy	18.3876	0.695187
GO:0030512	0.323592	1.31205	4.66606	6	77	negative regulation of transforming growth factor beta receptor signaling pathway	18.3876	0.695187
GO:0090287	0.324528	1.13337	18.7248	21	309	regulation of cellular response to growth factor stimulus	3.99629	0.696575
GO:0043410	0.326549	1.09583	33.1472	36	547	positive regulation of MAPK cascade	2.18616	0.70029
GO:0012501	0.327333	1.04884	125.075	130	2064	programmed cell death	0.554471	0.700599
GO:0009267	0.327568	1.18729	10.2411	12	169	cellular response to starvation	7.63419	0.700599
GO:0000187	0.327568	1.18729	10.2411	12	169	activation of MAPK activity	7.63419	0.700599
GO:0043405	0.328304	1.12037	21.6336	24	357	regulation of MAP kinase activity	3.4216	0.701548
GO:0043523	0.328736	1.14852	14.9678	17	247	regulation of neuron apoptotic process	5.06302	0.701848
GO:0051222	0.329288	1.11679	22.6031	25	373	positive regulation of protein transport	3.26496	0.702404
GO:1904951	0.330161	1.11351	23.5727	26	389	positive regulation of establishment of protein localization	3.12197	0.70364
GO:0008154	0.330716	1.14167	15.9373	18	263	actin polymerization or depolymerization	4.72842	0.704199
GO:0043043	0.331231	1.08027	43.8731	47	724	peptide biosynthetic process	1.6292	0.704255
GO:0034109	0.331328	1.24225	6.5446	8	108	homotypic cell-cell adhesion	12.4623	0.704255
GO:0002791	0.333317	1.11694	21.6941	24	358	regulation of peptide secretion	3.40252	0.706568
GO:0010950	0.334165	1.16304	12.1802	14	201	positive regulation of endopeptidase activity	6.29638	0.706568
GO:0002763	0.334302	1.33821	3.81769	5	63	positive regulation of myeloid leukocyte differentiation	22.8899	0.706568
GO:0050853	0.334302	1.33821	3.81769	5	63	B cell receptor signaling pathway	22.8899	0.706568
GO:0007606	0.334302	1.33821	3.81769	5	63	sensory perception of chemical stimulus	22.8899	0.706568
GO:0002200	0.334475	1.29374	4.72666	6	78	somatic diversification of immune receptors	17.9191	0.706568
GO:0010517	0.334475	1.29374	4.72666	6	78	regulation of phospholipase activity	17.9191	0.706568
GO:0051651	0.334768	1.14347	15.0283	17	248	maintenance of location in cell	5.02227	0.706568
GO:0051924	0.336573	1.13695	15.9979	18	264	regulation of calcium ion transport	4.69267	0.708402
GO:0042594	0.336736	1.15362	13.1498	15	217	response to starvation	5.78798	0.708402
GO:0006915	0.336775	1.04699	120.409	125	1987	apoptotic process	0.575267	0.708402
GO:1902531	0.336815	1.0477	116.47	121	1922	regulation of intracellular signal transduction	0.59516	0.708402
GO:0034219	0.337499	1.21529	7.51417	9	124	carbohydrate transmembrane transport	10.6354	0.7086
GO:1903959	0.337499	1.21529	7.51417	9	124	regulation of anion transmembrane transport	10.6354	0.7086
GO:0016055	0.338921	1.08639	35.2681	38	582	Wnt signaling pathway	2.03841	0.710966
GO:0070997	0.340902	1.10195	25.633	28	423	neuron death	2.84336	0.714498
GO:0002576	0.342392	1.19456	8.48375	10	140	platelet degranulation	9.27041	0.716269
GO:0051047	0.342623	1.11355	20.8458	23	344	positive regulation of secretion	3.53155	0.716269
GO:0051656	0.342641	1.09003	31.4505	34	519	establishment of organelle localization	2.2935	0.716269
GO:0061726	0.343257	1.24917	5.69623	7	94	mitochondrion disassembly	14.3945	0.716311
GO:0000422	0.343257	1.24917	5.69623	7	94	autophagy of mitochondrion	14.3945	0.716311
GO:0042440	0.345401	1.27593	4.78726	6	79	pigment metabolic process	17.4684	0.718912
GO:0009142	0.345401	1.27593	4.78726	6	79	nucleoside triphosphate biosynthetic process	17.4684	0.718912
GO:0006695	0.345401	1.27593	4.78726	6	79	cholesterol biosynthetic process	17.4684	0.718912
GO:0007586	0.346133	1.20473	7.57477	9	125	digestion	10.4659	0.719337
GO:0097553	0.346339	1.17813	9.45332	11	156	calcium ion transmembrane import into cytosol	8.21294	0.719337
GO:0016445	0.346503	1.31543	3.87828	5	64	somatic diversification of immunoglobulins	22.1802	0.719337
GO:0198738	0.346903	1.08226	35.3893	38	584	cell-cell signaling by wnt	2.02448	0.719546
GO:0016101	0.34979	1.21772	6.6658	8	110	diterpenoid metabolic process	12.0132	0.724379
GO:0051282	0.350544	1.18536	8.54434	10	141	regulation of sequestering of calcium ion	9.13938	0.724379
GO:0051283	0.350544	1.18536	8.54434	10	141	negative regulation of sequestering of calcium ion	9.13938	0.724379
GO:0051209	0.350544	1.18536	8.54434	10	141	release of sequestered calcium ion into cytosol	9.13938	0.724379
GO:0034660	0.350739	1.09211	27.6934	30	457	ncRNA metabolic process	2.61002	0.724379
GO:0010648	0.35203	1.04869	91.2609	95	1506	negative regulation of cell communication	0.761077	0.72642
GO:2000026	0.352629	1.04876	90.2913	94	1490	regulation of multicellular organismal development	0.769326	0.727034
GO:0030036	0.353242	1.06426	52.0538	55	859	actin cytoskeleton organization	1.35435	0.727086
GO:1900407	0.35326	1.23489	5.75683	7	95	regulation of cellular response to oxidative stress	14.0931	0.727086
GO:0046328	0.354082	1.16998	9.51391	11	157	regulation of JNK cascade	8.10865	0.727534
GO:0055067	0.354082	1.16998	9.51391	11	157	monovalent inorganic cation homeostasis	8.10865	0.727534
GO:0051017	0.35444	1.14443	12.362	14	204	actin filament bundle assembly	6.11255	0.727647
GO:0009165	0.356276	1.1137	18.1189	20	299	nucleotide biosynthetic process	4.06483	0.728474
GO:0046323	0.356359	1.2586	4.84785	6	80	glucose import	17.0344	0.728474
GO:0035710	0.356359	1.2586	4.84785	6	80	CD4-positive, alpha-beta T cell activation	17.0344	0.728474
GO:1903201	0.356359	1.2586	4.84785	6	80	regulation of oxidative stress-induced cell death	17.0344	0.728474
GO:0014823	0.356359	1.2586	4.84785	6	80	response to activity	17.0344	0.728474
GO:0023057	0.357189	1.04705	91.3821	95	1508	negative regulation of signaling	0.75906	0.729553
GO:0045786	0.357656	1.07156	40.419	43	667	negative regulation of cell cycle	1.75619	0.729885
GO:0071496	0.358669	1.10007	21.9971	24	363	cellular response to external stimulus	3.30943	0.730834
GO:1902743	0.358729	1.29342	3.93888	5	65	regulation of lamellipodium organization	21.503	0.730834
GO:0051056	0.359307	1.09494	23.9363	26	395	regulation of small GTPase mediated signal transduction	3.02785	0.731391
GO:0006412	0.360733	1.06833	42.4187	45	700	translation	1.66867	0.733673
GO:0015718	0.361249	1.13836	12.4226	14	205	monocarboxylic acid transport	6.05306	0.734102
GO:0051493	0.362122	1.07135	38.5404	41	636	regulation of cytoskeleton organization	1.84172	0.735255
GO:0046700	0.362435	1.07221	37.5709	40	620	heterocycle catabolic process	1.89074	0.73527
GO:0007015	0.363923	1.07852	31.7534	34	524	actin filament organization	2.24994	0.737664
GO:0034250	0.36437	1.15024	10.5441	12	174	positive regulation of cellular amide metabolic process	7.20174	0.737949
GO:0009152	0.366413	1.14054	11.5137	13	190	purine ribonucleotide biosynthetic process	6.54321	0.741065
GO:0140013	0.366933	1.16737	8.66554	10	143	meiotic nuclear division	8.88552	0.741065
GO:1902653	0.367339	1.24173	4.90845	6	81	secondary alcohol biosynthetic process	16.6164	0.741065
GO:0014743	0.367339	1.24173	4.90845	6	81	regulation of muscle hypertrophy	16.6164	0.741065
GO:0051239	0.36751	1.03324	167.736	172	2768	regulation of multicellular organismal process	0.407898	0.741065
GO:0050731	0.368079	1.13235	12.4832	14	206	positive regulation of peptidyl-tyrosine phosphorylation	5.99444	0.741065
GO:0043502	0.368375	1.19414	6.787	8	112	regulation of muscle adaptation	11.588	0.741065
GO:0006970	0.368375	1.19414	6.787	8	112	response to osmotic stress	11.588	0.741065
GO:1903046	0.369646	1.154	9.63511	11	159	meiotic cell cycle process	7.90594	0.743
GO:0009201	0.370968	1.27213	3.99948	5	66	ribonucleoside triphosphate biosynthetic process	20.8563	0.743792
GO:0070059	0.370968	1.27213	3.99948	5	66	intrinsic apoptotic signaling pathway in response to endoplasmic reticulum stress	20.8563	0.743792
GO:0034121	0.370968	1.27213	3.99948	5	66	regulation of toll-like receptor signaling pathway	20.8563	0.743792
GO:0034655	0.371505	1.07093	34.7834	37	574	nucleobase-containing compound catabolic process	2.04048	0.744249
GO:1901293	0.373213	1.10162	18.3007	20	302	nucleoside phosphate biosynthetic process	3.98447	0.746064
GO:0008283	0.373254	1.03676	121.378	125	2003	cell population proliferation	0.566113	0.746064
GO:0051881	0.373342	1.20728	5.87802	7	97	regulation of mitochondrial membrane potential	13.5179	0.746064
GO:0031331	0.373752	1.08059	27.0268	29	446	positive regulation of cellular catabolic process	2.64901	0.746262
GO:0046434	0.375161	1.15858	8.72614	10	144	organophosphate catabolic process	8.76254	0.748052
GO:1901701	0.375271	1.04516	77.0203	80	1271	cellular response to oxygen-containing compound	0.899816	0.748052
GO:0055086	0.376737	1.06266	40.722	43	672	nucleobase-containing small molecule metabolic process	1.73015	0.750352
GO:0097305	0.377632	1.10929	15.4525	17	255	response to alcohol	4.75033	0.750425
GO:0003300	0.377699	1.18268	6.84759	8	113	cardiac muscle hypertrophy	11.3838	0.750425
GO:0033866	0.378334	1.2253	4.96905	6	82	nucleoside bisphosphate biosynthetic process	16.2136	0.750425
GO:0034030	0.378334	1.2253	4.96905	6	82	ribonucleoside bisphosphate biosynthetic process	16.2136	0.750425
GO:0034033	0.378334	1.2253	4.96905	6	82	purine nucleoside bisphosphate biosynthetic process	16.2136	0.750425
GO:0014074	0.379261	1.13606	10.6653	12	176	response to purine-containing compound	7.039	0.751644
GO:0061572	0.381793	1.12052	12.6044	14	208	actin filament bundle organization	5.87972	0.755962
GO:0044270	0.382282	1.06267	37.8739	40	625	cellular nitrogen compound catabolic process	1.86061	0.755962
GO:0097035	0.383208	1.25152	4.06008	5	67	regulation of membrane lipid distribution	20.2384	0.755962
GO:0009247	0.383208	1.25152	4.06008	5	67	glycolipid biosynthetic process	20.2384	0.755962
GO:0034113	0.383208	1.25152	4.06008	5	67	heterotypic cell-cell adhesion	20.2384	0.755962
GO:0006643	0.383327	1.10917	14.5436	16	240	membrane lipid metabolic process	5.04722	0.755962
GO:1904659	0.387038	1.17144	6.90819	8	114	glucose transmembrane transport	11.185	0.762656
GO:0072522	0.389293	1.10905	13.6346	15	225	purine-containing compound biosynthetic process	5.3837	0.76647
GO:1902414	0.389695	1.15454	7.87776	9	130	protein localization to cell junction	9.67633	0.766635
GO:0006979	0.3915	1.06781	29.2083	31	482	response to oxidative stress	2.4245	0.769554
GO:0140353	0.393482	1.18087	5.99922	7	99	lipid export from cell	12.9772	0.772189
GO:0006919	0.393482	1.18087	5.99922	7	99	activation of cysteine-type endopeptidase activity involved in apoptotic process	12.9772	0.772189
GO:0007596	0.394798	1.07728	22.4213	24	370	blood coagulation	3.18539	0.774129
GO:0032608	0.395437	1.23157	4.12068	5	68	interferon-beta production	19.6475	0.774129
GO:0048260	0.395437	1.23157	4.12068	5	68	positive regulation of receptor-mediated endocytosis	19.6475	0.774129
GO:0034766	0.396386	1.16042	6.96879	8	115	negative regulation of ion transmembrane transport	10.9913	0.774725
GO:0014013	0.396386	1.16042	6.96879	8	115	regulation of gliogenesis	10.9913	0.774725
GO:0022411	0.398311	1.05514	38.1163	40	629	cellular component disassembly	1.83702	0.777856
GO:0045582	0.400331	1.19372	5.09025	6	84	positive regulation of T cell differentiation	15.4507	0.779899
GO:0006635	0.400331	1.19372	5.09025	6	84	fatty acid beta-oxidation	15.4507	0.779899
GO:0051279	0.400331	1.19372	5.09025	6	84	regulation of release of sequestered calcium ion into cytosol	15.4507	0.779899
GO:0045667	0.400984	1.12332	9.8775	11	163	regulation of osteoblast differentiation	7.52268	0.780539
GO:0051048	0.40171	1.11541	10.8471	12	179	negative regulation of secretion	6.80503	0.781319
GO:0006310	0.402298	1.08744	16.6645	18	275	DNA recombination	4.32476	0.78183
GO:1901700	0.404233	1.02983	110.289	113	1820	response to oxygen-containing compound	0.619856	0.784957
GO:0002683	0.404602	1.06951	23.5121	25	388	negative regulation of immune system process	3.01739	0.785039
GO:0050817	0.405218	1.07094	22.5425	24	372	coagulation	3.15123	0.7856
GO:0006721	0.405737	1.14959	7.02939	8	116	terpenoid metabolic process	10.8026	0.785972
GO:0045807	0.407218	1.13561	7.99896	9	132	positive regulation of endocytosis	9.38533	0.786638
GO:0046324	0.407644	1.21224	4.18127	5	69	regulation of glucose import	19.0821	0.786638
GO:0046888	0.407644	1.21224	4.18127	5	69	negative regulation of hormone secretion	19.0821	0.786638
GO:0061098	0.407644	1.21224	4.18127	5	69	positive regulation of protein tyrosine kinase activity	19.0821	0.786638
GO:0001936	0.408209	1.12468	8.96853	10	148	regulation of endothelial cell proliferation	8.29529	0.786638
GO:0045597	0.408347	1.04079	55.9927	58	924	positive regulation of cell differentiation	1.23435	0.786638
GO:0015850	0.409256	1.0932	13.8164	15	228	organic hydroxy compound transport	5.24296	0.786638
GO:0043085	0.409706	1.02994	98.5326	101	1626	positive regulation of catalytic activity	0.694121	0.786638
GO:0071902	0.41044	1.0678	22.6031	24	373	positive regulation of protein serine/threonine kinase activity	3.13436	0.786638
GO:0043087	0.410766	1.05351	33.3896	35	551	regulation of GTPase activity	2.09469	0.786638
GO:0046513	0.411316	1.17853	5.15085	6	85	ceramide biosynthetic process	15.0893	0.786638
GO:0002532	0.411316	1.17853	5.15085	6	85	production of molecular mediator involved in inflammatory response	15.0893	0.786638
GO:0032482	0.411316	1.17853	5.15085	6	85	Rab protein signal transduction	15.0893	0.786638
GO:0050764	0.411316	1.17853	5.15085	6	85	regulation of phagocytosis	15.0893	0.786638
GO:0033077	0.411316	1.17853	5.15085	6	85	T cell differentiation in thymus	15.0893	0.786638
GO:0007631	0.411316	1.17853	5.15085	6	85	feeding behavior	15.0893	0.786638
GO:0051050	0.412173	1.03824	59.0226	61	974	positive regulation of transport	1.16833	0.787649
GO:1902106	0.413625	1.15558	6.12042	7	101	negative regulation of leukocyte differentiation	12.4684	0.789432
GO:0016054	0.413818	1.07653	17.7553	19	293	organic acid catabolic process	4.02136	0.789432
GO:0009612	0.414972	1.08156	15.8161	17	261	response to mechanical stimulus	4.53443	0.789432
GO:0034763	0.415086	1.13897	7.08999	8	117	negative regulation of transmembrane transport	10.6187	0.789432
GO:0014897	0.415086	1.13897	7.08999	8	117	striated muscle hypertrophy	10.6187	0.789432
GO:0006109	0.415926	1.08802	13.877	15	229	regulation of carbohydrate metabolic process	5.19727	0.789432
GO:0001906	0.415983	1.12638	8.05956	9	133	cell killing	9.24473	0.789432
GO:0010256	0.416047	1.05184	32.4806	34	536	endomembrane system organization	2.15033	0.789432
GO:0044272	0.416295	1.09198	12.9074	14	213	sulfur compound biosynthetic process	5.60691	0.789432
GO:0072329	0.416487	1.11651	9.02913	10	149	monocarboxylic acid catabolic process	8.18432	0.789432
GO:0043467	0.416717	1.10206	10.9683	12	181	regulation of generation of precursor metabolites and energy	6.65547	0.789432
GO:0046942	0.418932	1.07063	18.7854	20	310	carboxylic acid transport	3.78148	0.793001
GO:0048747	0.419818	1.19351	4.24187	5	70	muscle fiber development	18.5408	0.793429
GO:1903749	0.419818	1.19351	4.24187	5	70	positive regulation of establishment of protein localization to mitochondrion	18.5408	0.793429
GO:0031330	0.420483	1.07467	16.8463	18	278	negative regulation of cellular catabolic process	4.23192	0.794061
GO:0018193	0.421056	1.02899	83.9285	86	1385	peptidyl-amino acid modification	0.814618	0.794519
GO:1905114	0.422224	1.04175	42.4187	44	700	cell surface receptor signaling pathway involved in cell-cell signaling	1.63159	0.795582
GO:0043507	0.422281	1.16371	5.21144	6	86	positive regulation of JUN kinase activity	14.7404	0.795582
GO:0001523	0.423682	1.14334	6.18101	7	102	retinoid metabolic process	12.2251	0.795728
GO:0002065	0.423682	1.14334	6.18101	7	102	columnar/cuboidal epithelial cell differentiation	12.2251	0.795728
GO:0015837	0.423682	1.14334	6.18101	7	102	amine transport	12.2251	0.795728
GO:1903707	0.423682	1.14334	6.18101	7	102	negative regulation of hemopoiesis	12.2251	0.795728
GO:0008645	0.424428	1.12853	7.15059	8	118	hexose transmembrane transport	10.4395	0.796507
GO:0043280	0.424763	1.10846	9.08973	10	150	positive regulation of cysteine-type endopeptidase activity involved in apoptotic process	8.07556	0.796514
GO:0044093	0.42537	1.02313	119.742	122	1976	positive regulation of molecular function	0.567729	0.79703
GO:0007599	0.426139	1.05847	22.7849	24	376	hemostasis	3.08454	0.797849
GO:0030335	0.426598	1.04222	38.5404	40	636	positive regulation of cell migration	1.7968	0.798087
GO:0030855	0.427211	1.04016	41.5098	43	685	epithelial cell differentiation	1.66511	0.798612
GO:0050790	0.431187	1.01939	150.708	153	2487	regulation of catalytic activity	0.449464	0.805418
GO:0016125	0.431733	1.08902	11.0895	12	183	sterol metabolic process	6.51079	0.805586
GO:2000756	0.431947	1.17535	4.30247	5	71	regulation of peptidyl-lysine acetylation	18.0222	0.805586
GO:0051592	0.433035	1.10052	9.15033	10	151	response to calcium ion	7.96895	0.806461
GO:0001776	0.433217	1.14927	5.27204	6	87	leukocyte homeostasis	14.4035	0.806461
GO:0006767	0.43372	1.13135	6.24161	7	103	water-soluble vitamin metabolic process	11.9889	0.806461
GO:0032088	0.433758	1.11829	7.21118	8	119	negative regulation of NF-kappaB transcription factor activity	10.2648	0.806461
GO:1901888	0.434843	1.07032	15.0283	16	248	regulation of cell junction assembly	4.72685	0.807854
GO:0048514	0.43527	1.03521	44.6003	46	736	blood vessel morphogenesis	1.54297	0.808022
GO:0044706	0.435953	1.07275	14.0588	15	232	multi-multicellular organism process	5.06373	0.808666
GO:0050679	0.437059	1.07554	13.0892	14	216	positive regulation of epithelial cell proliferation	5.45225	0.810092
GO:0032870	0.437827	1.03371	45.6304	47	753	cellular response to hormone stimulus	1.50613	0.810891
GO:0042177	0.441298	1.09269	9.21092	10	152	negative regulation of protein catabolic process	7.86444	0.816691
GO:0044264	0.443071	1.10823	7.27178	8	120	cellular polysaccharide metabolic process	10.0944	0.818131
GO:0045445	0.443734	1.11961	6.30221	7	104	myoblast differentiation	11.7594	0.818131
GO:0001541	0.444023	1.15772	4.36307	5	72	ovarian follicle development	17.5251	0.818131
GO:0015844	0.444023	1.15772	4.36307	5	72	monoamine transport	17.5251	0.818131
GO:1902041	0.444023	1.15772	4.36307	5	72	regulation of extrinsic apoptotic signaling pathway via death domain receptors	17.5251	0.818131
GO:0071229	0.444118	1.13517	5.33264	6	88	cellular response to acid chemical	14.078	0.818131
GO:0110053	0.446188	1.0513	20.058	21	331	regulation of actin filament organization	3.48272	0.820573
GO:0032869	0.446247	1.05946	16.1191	17	266	cellular response to insulin stimulus	4.36557	0.820573
GO:0030029	0.446468	1.02605	58.659	60	968	actin filament-based process	1.16347	0.820573
GO:0061387	0.44955	1.08498	9.27152	10	153	regulation of extent of cell growth	7.76197	0.825349
GO:0010629	0.449753	1.02217	71.627	73	1182	negative regulation of gene expression	0.949386	0.825349
GO:0016485	0.450892	1.06485	13.2104	14	218	protein processing	5.35266	0.825767
GO:0030516	0.450964	1.09087	8.30195	9	137	regulation of axon extension	8.71277	0.825767
GO:0048646	0.451011	1.0211	75.6265	77	1248	anatomical structure formation involved in morphogenesis	0.89829	0.825767
GO:0046034	0.451802	1.04785	20.1186	21	332	ATP metabolic process	3.46177	0.826585
GO:0001676	0.453717	1.10811	6.36281	7	105	long-chain fatty acid metabolic process	11.5365	0.826729
GO:0002832	0.453717	1.10811	6.36281	7	105	negative regulation of response to biotic stimulus	11.5365	0.826729
GO:1901989	0.453717	1.10811	6.36281	7	105	positive regulation of cell cycle phase transition	11.5365	0.826729
GO:0010770	0.453717	1.10811	6.36281	7	105	positive regulation of cell morphogenesis involved in differentiation	11.5365	0.826729
GO:0009725	0.454602	1.02224	62.7797	64	1036	response to hormone	1.08347	0.826729
GO:0031100	0.454976	1.12142	5.39324	6	89	animal organ regeneration	13.7634	0.826729
GO:0006826	0.454976	1.12142	5.39324	6	89	iron ion transport	13.7634	0.826729
GO:0061180	0.454976	1.12142	5.39324	6	89	mammary gland epithelium development	13.7634	0.826729
GO:0010507	0.454976	1.12142	5.39324	6	89	negative regulation of autophagy	13.7634	0.826729
GO:0071300	0.456034	1.14062	4.42367	5	73	cellular response to retinoic acid	17.0482	0.827401
GO:0033555	0.456034	1.14062	4.42367	5	73	multicellular organismal response to stress	17.0482	0.827401
GO:0050808	0.457472	1.03459	29.0871	30	480	synapse organization	2.36589	0.829383
GO:0072657	0.458072	1.02584	44.9638	46	742	protein localization to membrane	1.51812	0.829846
GO:0010720	0.459358	1.0405	22.1789	23	366	positive regulation of cell development	3.11976	0.831549
GO:0015749	0.461626	1.08863	7.39298	8	122	monosaccharide transmembrane transport	9.76619	0.835026
GO:0051402	0.462989	1.04598	17.2705	18	285	neuron apoptotic process	4.02659	0.835979
GO:1905954	0.463664	1.09684	6.42341	7	106	positive regulation of lipid localization	11.3199	0.835979
GO:0008630	0.463664	1.09684	6.42341	7	106	intrinsic apoptotic signaling pathway in response to DNA damage	11.3199	0.835979
GO:0032355	0.463795	1.06656	10.3623	11	171	response to estradiol	6.83527	0.835979
GO:0044282	0.463892	1.03211	28.1782	29	465	small molecule catabolic process	2.43695	0.835979
GO:0034329	0.465094	1.03005	30.1779	31	498	cell junction assembly	2.27121	0.837517
GO:0007127	0.465784	1.10799	5.45384	6	90	meiosis I	13.4593	0.838131
GO:0062197	0.466192	1.0344	24.2393	25	400	cellular response to chemical stress	2.83906	0.838208
GO:0006694	0.466872	1.0559	12.362	13	204	steroid biosynthetic process	5.67594	0.838208
GO:0030833	0.466872	1.0559	12.362	13	204	regulation of actin filament polymerization	5.67594	0.838208
GO:0032481	0.467972	1.12401	4.48427	5	74	positive regulation of type I interferon production	16.5906	0.839556
GO:0008544	0.468629	1.03762	20.3004	21	335	epidermis development	3.40004	0.840108
GO:0008361	0.46928	1.04822	14.3618	15	237	regulation of cell size	4.85232	0.840647
GO:0016567	0.470337	1.01854	54.1142	55	893	protein ubiquitination	1.25318	0.841913
GO:0051963	0.47357	1.08579	6.48401	7	107	regulation of synapse assembly	11.1093	0.846361
GO:0042542	0.474201	1.06246	9.45332	10	156	response to hydrogen peroxide	7.46631	0.846361
GO:1903169	0.474201	1.06246	9.45332	10	156	regulation of calcium ion transmembrane transport	7.46631	0.846361
GO:0031098	0.474229	1.03425	20.361	21	336	stress-activated protein kinase signaling cascade	3.37984	0.846361
GO:1903532	0.476436	1.03421	19.3914	20	320	positive regulation of secretion by cell	3.54883	0.849052
GO:0034330	0.476444	1.01715	50.2359	51	829	cell junction organization	1.34839	0.849052
GO:0051272	0.477729	1.01943	40.2978	41	665	positive regulation of cellular component movement	1.68459	0.850711
GO:0060402	0.479384	1.05324	10.4835	11	173	calcium ion transport into cytosol	6.67814	0.852555
GO:0072089	0.479828	1.10787	4.54486	5	75	stem cell proliferation	16.1511	0.852555
GO:0046626	0.479828	1.10787	4.54486	5	75	regulation of insulin receptor signaling pathway	16.1511	0.852555
GO:0050678	0.48158	1.02597	24.4211	25	403	regulation of epithelial cell proliferation	2.79695	0.855035
GO:0010522	0.483428	1.07497	6.5446	7	108	regulation of calcium ion transport into cytosol	10.9045	0.856621
GO:0008625	0.483428	1.07497	6.5446	7	108	extrinsic apoptotic signaling pathway via death domain receptors	10.9045	0.856621
GO:0010941	0.483542	1.00888	104.229	105	1720	regulation of cell death	0.644893	0.856621
GO:2000116	0.486343	1.03406	15.5131	16	256	regulation of cysteine-type endopeptidase activity	4.43604	0.860948
GO:0034308	0.48722	1.08207	5.57503	6	92	primary alcohol metabolic process	12.8804	0.861867
GO:0031669	0.489165	1.03402	14.5436	15	240	cellular response to nutrient levels	4.73177	0.863488
GO:0006672	0.489214	1.0605	7.57477	8	125	ceramide metabolic process	9.30304	0.863488
GO:0007189	0.489214	1.0605	7.57477	8	125	adenylate cyclase-activating G protein-coupled receptor signaling pathway	9.30304	0.863488
GO:0019318	0.489883	1.02999	16.5433	17	273	hexose metabolic process	4.14456	0.863882
GO:0002695	0.490515	1.04796	9.57451	10	158	negative regulation of leukocyte activation	7.27848	0.863882
GO:0048660	0.490515	1.04796	9.57451	10	158	regulation of smooth muscle cell proliferation	7.27848	0.863882
GO:0045670	0.491594	1.0922	4.60546	5	76	regulation of osteoclast differentiation	15.7289	0.865147
GO:0031348	0.495377	1.03395	12.6044	13	208	negative regulation of defense response	5.45974	0.871148
GO:2000147	0.495728	1.01208	39.5706	40	653	positive regulation of cell motility	1.70447	0.871148
GO:0009199	0.497836	1.06956	5.63563	6	93	ribonucleoside triphosphate metabolic process	12.6049	0.871782
GO:0005977	0.497836	1.06956	5.63563	6	93	glycogen metabolic process	12.6049	0.871782
GO:0006073	0.497836	1.06956	5.63563	6	93	cellular glucan metabolic process	12.6049	0.871782
GO:0044042	0.497836	1.06956	5.63563	6	93	glucan metabolic process	12.6049	0.871782
GO:0043086	0.498007	1.00963	46.6	47	769	negative regulation of catalytic activity	1.44411	0.871782
GO:0032446	0.498385	1.00756	60.5982	61	1000	protein modification by small protein conjugation	1.10837	0.871782
GO:0048659	0.498627	1.04085	9.63511	10	159	smooth muscle cell proliferation	7.18722	0.871782
GO:0030041	0.498992	1.02901	13.6346	14	225	actin filament polymerization	5.02479	0.871785
GO:0009988	0.50326	1.07695	4.66606	5	77	cell-cell recognition	15.323	0.876694
GO:0050709	0.50326	1.07695	4.66606	5	77	negative regulation of protein secretion	15.323	0.876694
GO:0003143	0.50326	1.07695	4.66606	5	77	embryonic heart tube morphogenesis	15.323	0.876694
GO:0008344	0.50326	1.07695	4.66606	5	77	adult locomotory behavior	15.323	0.876694
GO:1903827	0.503832	1.00864	39.6918	40	655	regulation of cellular protein localization	1.69407	0.877054
GO:0008202	0.504991	1.0169	19.6944	20	325	steroid metabolic process	3.44047	0.878436
GO:0046578	0.505797	1.02409	13.6952	14	226	regulation of Ras protein signal transduction	4.98042	0.879202
GO:0010769	0.507391	1.04253	7.69597	8	127	regulation of cell morphogenesis involved in differentiation	9.01234	0.881335
GO:0018958	0.508375	1.05733	5.69623	6	94	phenol-containing compound metabolic process	12.3382	0.881771
GO:0061982	0.508375	1.05733	5.69623	6	94	meiosis I cell cycle process	12.3382	0.881771
GO:0050728	0.511269	1.0338	8.72614	9	144	negative regulation of inflammatory response	7.88628	0.88615
GO:0051241	0.513017	1.00232	63.8705	64	1054	negative regulation of multicellular organismal process	1.04678	0.88854
GO:0032479	0.514746	1.02692	9.75631	10	161	regulation of type I interferon production	7.00976	0.890381
GO:0043407	0.514821	1.06212	4.72666	5	78	negative regulation of MAP kinase activity	14.9326	0.890381
GO:0051250	0.516403	1.03377	7.75657	8	128	negative regulation of lymphocyte activation	8.87207	0.892475
GO:0001501	0.517167	1.0041	33.8744	34	559	skeletal system development	1.97702	0.893153
GO:0010628	0.517982	1.0007	62.9615	63	1039	positive regulation of gene expression	1.06039	0.893919
GO:0007163	0.520694	1.0099	16.8463	17	278	establishment or maintenance of cell polarity	3.99682	0.897526
GO:0034248	0.520819	1.0036	28.9053	29	477	regulation of cellular amide metabolic process	2.31588	0.897526
GO:0048469	0.522747	1.02009	9.81691	10	162	cell maturation	6.92349	0.900204
GO:1901216	0.525359	1.02515	7.81717	8	129	positive regulation of neuron death	8.73505	0.903407
GO:0006892	0.525359	1.02515	7.81717	8	129	post-Golgi vesicle-mediated transport	8.73505	0.903407
GO:0001934	0.52599	0.99828	55.0837	55	909	positive regulation of protein phosphorylation	1.20946	0.903846
GO:0060401	0.528095	1.01115	11.8772	12	196	cytosolic calcium ion transport	5.67576	0.90625
GO:0045598	0.528143	1.01857	8.84733	9	146	regulation of fat cell differentiation	7.6717	0.90625
GO:0060333	0.529202	1.03369	5.81743	6	96	interferon-gamma-mediated signaling pathway	11.8294	0.907142
GO:0010035	0.529418	0.998283	36.0559	36	595	response to inorganic substance	1.84767	0.907142
GO:0032872	0.530507	1.00775	12.9074	13	213	regulation of stress-activated MAPK cascade	5.20642	0.907408
GO:0001101	0.530706	1.01336	9.8775	10	163	response to acid chemical	6.8388	0.907408
GO:0032606	0.530706	1.01336	9.8775	10	163	type I interferon production	6.8388	0.907408
GO:0005996	0.53495	1.00014	17.9977	18	297	monosaccharide metabolic process	3.70778	0.913343
GO:0042063	0.535198	0.998572	21.0276	21	347	gliogenesis	3.16895	0.913343
GO:0008285	0.535316	0.99511	47.206	47	779	negative regulation of cell population proliferation	1.40727	0.913343
GO:0050777	0.536504	1.01112	8.90793	9	147	negative regulation of immune response	7.56768	0.913989
GO:0045600	0.537596	1.03366	4.84785	5	80	positive regulation of fat cell differentiation	14.1953	0.913989
GO:0071230	0.537596	1.03366	4.84785	5	80	cellular response to amino acid stimulus	14.1953	0.913989
GO:0035308	0.537596	1.03366	4.84785	5	80	negative regulation of protein dephosphorylation	14.1953	0.913989
GO:1904063	0.537596	1.03366	4.84785	5	80	negative regulation of cation transmembrane transport	14.1953	0.913989
GO:0040017	0.54003	0.993446	40.2372	40	664	positive regulation of locomotion	1.64846	0.917347
GO:0032879	0.540334	0.994323	176.765	176	2917	regulation of localization	0.375833	0.917347
GO:1903793	0.541596	0.993097	33.2078	33	548	positive regulation of anion transport	1.99668	0.918841
GO:0009887	0.542131	0.992628	69.4455	69	1146	animal organ morphogenesis	0.954629	0.919099
GO:0008033	0.543088	1.00834	7.93836	8	131	tRNA processing	8.47037	0.920072
GO:1904062	0.544404	0.99359	20.1186	20	332	regulation of cation transmembrane transport	3.29692	0.921652
GO:0071407	0.545485	0.991168	41.328	41	682	cellular response to organic cyclic compound	1.60166	0.922833
GO:0045685	0.548797	1.01999	4.90845	5	81	regulation of glial cell differentiation	13.847	0.92583
GO:0046847	0.548797	1.01999	4.90845	5	81	filopodium assembly	13.847	0.92583
GO:0006278	0.548797	1.01999	4.90845	5	81	RNA-dependent DNA biosynthetic process	13.847	0.92583
GO:2000243	0.548797	1.01999	4.90845	5	81	positive regulation of reproductive process	13.847	0.92583
GO:1903038	0.550703	1.0048	6.96879	7	115	negative regulation of leukocyte cell-cell adhesion	9.61739	0.928114
GO:0070302	0.551223	0.992646	13.0892	13	216	regulation of stress-activated protein kinase signaling cascade	5.0628	0.928114
GO:0051130	0.551309	0.989984	79.6866	79	1315	positive regulation of cellular component organization	0.8301	0.928114
GO:0019693	0.552011	0.988399	28.2993	28	467	ribose phosphate metabolic process	2.33281	0.928645
GO:0034599	0.555499	0.987121	20.2398	20	334	cellular response to oxidative stress	3.25756	0.933294
GO:0007416	0.555551	0.991314	11.0895	11	183	synapse assembly	5.96823	0.933294
GO:0001909	0.559733	1.00014	5.99922	6	99	leukocyte mediated cytotoxicity	11.1234	0.937107
GO:1901983	0.559866	1.00667	4.96905	5	82	regulation of protein acetylation	13.5113	0.937107
GO:0061035	0.559866	1.00667	4.96905	5	82	regulation of cartilage development	13.5113	0.937107
GO:0008543	0.560013	0.995517	7.02939	7	116	fibroblast growth factor receptor signaling pathway	9.45229	0.937107
GO:1902903	0.560073	0.98439	27.3904	27	452	regulation of supramolecular fiber organization	2.40127	0.937107
GO:0000724	0.560549	0.992069	8.05956	8	133	double-strand break repair via homologous recombination	8.21754	0.937107
GO:0030148	0.560549	0.992069	8.05956	8	133	sphingolipid biosynthetic process	8.21754	0.937107
GO:0050673	0.561391	0.983776	28.4205	28	469	epithelial cell proliferation	2.31296	0.937504
GO:0065009	0.561566	0.989939	189.43	188	3126	regulation of molecular function	0.349571	0.937504
GO:0051607	0.563883	0.984058	12.1802	12	201	defense response to virus	5.3969	0.940065
GO:0140546	0.563883	0.984058	12.1802	12	201	defense response to symbiont	5.3969	0.940065
GO:0005976	0.569172	0.984127	8.12016	8	134	polysaccharide metabolic process	8.09534	0.943349
GO:0000725	0.569172	0.984127	8.12016	8	134	recombinational repair	8.09534	0.943349
GO:0060079	0.569236	0.986398	7.08999	7	117	excitatory postsynaptic potential	9.2914	0.943349
GO:0099175	0.569236	0.986398	7.08999	7	117	regulation of postsynapse organization	9.2914	0.943349
GO:0043506	0.569701	0.989431	6.05982	6	100	regulation of JUN kinase activity	10.902	0.943349
GO:1903363	0.569701	0.989431	6.05982	6	100	negative regulation of cellular protein catabolic process	10.902	0.943349
GO:0070585	0.569768	0.980944	10.1805	10	168	protein localization to mitochondrion	6.43778	0.943349
GO:0032535	0.570711	0.979195	28.5417	28	471	regulation of cellular component size	2.29335	0.943349
GO:0032370	0.570797	0.993693	5.02965	5	83	positive regulation of lipid transport	13.1877	0.943349
GO:1902930	0.570797	0.993693	5.02965	5	83	regulation of alcohol biosynthetic process	13.1877	0.943349
GO:0055021	0.570797	0.993693	5.02965	5	83	regulation of cardiac muscle tissue growth	13.1877	0.943349
GO:0065004	0.570915	0.97881	12.2408	12	202	protein-DNA complex assembly	5.34359	0.943349
GO:0045927	0.570954	0.978094	19.3914	19	320	positive regulation of growth	3.37139	0.943349
GO:0001503	0.575347	0.976919	28.6023	28	472	ossification	2.28365	0.949955
GO:0050866	0.577589	0.974115	11.2713	11	186	negative regulation of cell activation	5.77726	0.95233
GO:0034446	0.577718	0.97631	8.18075	8	135	substrate adhesion-dependent cell spreading	7.97586	0.95233
GO:0009259	0.578991	0.974933	27.6328	27	456	ribonucleotide metabolic process	2.35933	0.95233
GO:0098742	0.579399	0.972495	15.3919	15	254	cell-cell adhesion via plasma-membrane adhesion molecules	4.22453	0.95233
GO:0045638	0.579559	0.978947	6.12042	6	101	negative regulation of myeloid cell differentiation	10.6872	0.95233
GO:0070301	0.579559	0.978947	6.12042	6	101	cellular response to hydrogen peroxide	10.6872	0.95233
GO:0055072	0.579559	0.978947	6.12042	6	101	iron ion homeostasis	10.6872	0.95233
GO:0050886	0.581586	0.981047	5.09025	5	84	endocrine process	12.8756	0.955009
GO:0042327	0.582277	0.978746	61.1436	60	1009	positive regulation of phosphorylation	1.07084	0.95549
GO:0009968	0.58387	0.980457	84.4133	83	1393	negative regulation of signal transduction	0.777196	0.957451
GO:0002262	0.584842	0.968478	12.362	12	204	myeloid cell homeostasis	5.23933	0.958391
GO:0050807	0.585616	0.968375	15.4525	15	255	regulation of synapse organization	4.19146	0.958398
GO:0097435	0.585809	0.976158	51.0843	50	843	supramolecular fiber organization	1.27841	0.958398
GO:0031668	0.586042	0.968341	16.4827	16	272	cellular response to extracellular stimulus	3.9295	0.958398
GO:0035295	0.586793	0.978459	72.3542	71	1194	tube development	0.904908	0.958857
GO:0043279	0.587406	0.968649	7.21118	7	119	response to alkaloid	8.98171	0.958857
GO:0007411	0.588233	0.968202	20.6034	20	340	axon guidance	3.1436	0.958857
GO:0046632	0.589301	0.968683	6.18101	6	102	alpha-beta T cell differentiation	10.4787	0.958857
GO:0050868	0.589301	0.968683	6.18101	6	102	negative regulation of T cell activation	10.4787	0.958857
GO:1903321	0.589301	0.968683	6.18101	6	102	negative regulation of protein modification by small protein conjugation or removal	10.4787	0.958857
GO:0071214	0.589514	0.968132	22.6637	22	374	cellular response to abiotic stimulus	2.85782	0.958857
GO:0104004	0.589514	0.968132	22.6637	22	374	cellular response to environmental stimulus	2.85782	0.958857
GO:0031397	0.592228	0.968716	5.15085	5	85	negative regulation of protein ubiquitination	12.5744	0.961971
GO:0002792	0.592228	0.968716	5.15085	5	85	negative regulation of peptide secretion	12.5744	0.961971
GO:0043200	0.594571	0.961039	8.30195	8	137	response to amino acid	7.74469	0.965125
GO:1901222	0.596347	0.96001	7.27178	7	120	regulation of NIK/NF-kappaB signaling	8.83264	0.966369
GO:0009141	0.596347	0.96001	7.27178	7	120	nucleoside triphosphate metabolic process	8.83264	0.966369
GO:0043067	0.596544	0.977713	95.8057	94	1581	regulation of programmed cell death	0.683312	0.966369
GO:1901617	0.597979	0.960699	16.6039	16	274	organic hydroxy compound biosynthetic process	3.87234	0.967635
GO:0120254	0.598925	0.958629	6.24161	6	103	olefinic compound metabolic process	10.2762	0.967635
GO:0006094	0.598925	0.958629	6.24161	6	103	gluconeogenesis	10.2762	0.967635
GO:0097485	0.598936	0.962052	20.7246	20	342	neuron projection guidance	3.10694	0.967635
GO:0048729	0.601944	0.968789	45.2668	44	747	tissue morphogenesis	1.43274	0.971137
GO:0042981	0.602663	0.975799	93.9272	92	1550	regulation of apoptotic process	0.695792	0.971137
GO:0009205	0.602719	0.95669	5.21144	5	86	purine ribonucleoside triphosphate metabolic process	12.2837	0.971137
GO:0021766	0.602719	0.95669	5.21144	5	86	hippocampus development	12.2837	0.971137
GO:0071695	0.604735	0.954473	13.574	13	224	anatomical structure maturation	4.70763	0.973019
GO:0032102	0.605137	0.960064	23.8757	23	394	negative regulation of response to external stimulus	2.69209	0.973019
GO:0048259	0.605188	0.951522	7.33238	7	121	regulation of receptor-mediated endocytosis	8.68725	0.973019
GO:0051246	0.605506	0.979651	165.615	163	2733	regulation of protein metabolic process	0.396518	0.973019
GO:0007601	0.606226	0.95208	11.5137	11	190	visual perception	5.53657	0.973525
GO:0035023	0.608426	0.948781	6.30221	6	104	regulation of Rho protein signal transduction	10.0795	0.975755
GO:0000045	0.608426	0.948781	6.30221	6	104	autophagosome assembly	10.0795	0.975755
GO:0007267	0.609114	0.975024	105.198	103	1736	cell-cell signaling	0.621002	0.976207
GO:0046660	0.611088	0.946234	8.42315	8	139	female sex differentiation	7.52342	0.977883
GO:0051783	0.611088	0.946234	8.42315	8	139	regulation of nuclear division	7.52342	0.977883
GO:0001558	0.61138	0.958802	28.057	27	463	regulation of cell growth	2.28853	0.977883
GO:0035050	0.613054	0.944958	5.27204	5	87	embryonic heart tube development	12.0029	0.979908
GO:0090101	0.613927	0.943182	7.39298	7	122	negative regulation of transmembrane receptor protein serine/threonine kinase signaling pathway	8.54542	0.980651
GO:0030258	0.615604	0.949455	16.7857	16	277	lipid modification	3.78892	0.982678
GO:0071333	0.616678	0.942139	9.51391	9	157	cellular response to glucose stimulus	6.63435	0.983086
GO:2000241	0.616678	0.942139	9.51391	9	157	regulation of reproductive process	6.63435	0.983086
GO:0001938	0.617802	0.939132	6.36281	6	105	positive regulation of endothelial cell proliferation	9.88844	0.983574
GO:0006885	0.617802	0.939132	6.36281	6	105	regulation of pH	9.88844	0.983574
GO:0009653	0.620242	0.976989	180.158	177	2973	anatomical structure morphogenesis	0.363863	0.986805
GO:0106027	0.62256	0.934986	7.45358	7	123	neuron projection organization	8.40703	0.986988
GO:0098754	0.62256	0.934986	7.45358	7	123	detoxification	8.40703	0.986988
GO:0007041	0.62256	0.934986	7.45358	7	123	lysosomal transport	8.40703	0.986988
GO:0099565	0.62256	0.934986	7.45358	7	123	chemical synaptic transmission, postsynaptic	8.40703	0.986988
GO:0031341	0.623231	0.933507	5.33264	5	88	regulation of cell killing	11.7317	0.986988
GO:0019233	0.623231	0.933507	5.33264	5	88	sensory perception of pain	11.7317	0.986988
GO:0016575	0.623231	0.933507	5.33264	5	88	histone deacetylation	11.7317	0.986988
GO:0010038	0.624798	0.948783	23.0879	22	381	response to metal ion	2.75377	0.988818
GO:0051962	0.625496	0.945975	19.9974	19	330	positive regulation of nervous system development	3.17016	0.989177
GO:0090630	0.627051	0.929676	6.42341	6	106	activation of GTPase activity	9.70274	0.989177
GO:0019319	0.627051	0.929676	6.42341	6	106	hexose biosynthetic process	9.70274	0.989177
GO:0036473	0.627051	0.929676	6.42341	6	106	cell death in response to oxidative stress	9.70274	0.989177
GO:0050953	0.627082	0.93619	11.6954	11	193	sensory perception of light stimulus	5.36578	0.989177
GO:0048015	0.629069	0.938602	14.8466	14	245	phosphatidylinositol-mediated signaling	4.2379	0.99166
GO:0010817	0.629985	0.951905	32.42	31	535	regulation of hormone levels	1.96793	0.991991
GO:0017015	0.631086	0.92693	7.51417	7	124	regulation of transforming growth factor beta receptor signaling pathway	8.27198	0.991991
GO:0045860	0.63164	0.954145	38.601	37	637	positive regulation of protein kinase activity	1.65683	0.991991
GO:0006766	0.631839	0.929447	9.63511	9	159	vitamin metabolic process	6.46849	0.991991
GO:0050954	0.631839	0.929447	9.63511	9	159	sensory perception of mechanical stimulus	6.46849	0.991991
GO:0001701	0.633884	0.948248	29.3901	28	485	in utero embryonic development	2.16287	0.991991
GO:0009888	0.634283	0.970023	124.044	121	2047	tissue development	0.524692	0.991991
GO:0016050	0.634345	0.944382	24.2393	23	400	vesicle organization	2.61194	0.991991
GO:0071375	0.634627	0.943393	23.2091	22	383	cellular response to peptide hormone stimulus	2.72509	0.991991
GO:0009117	0.634708	0.951341	35.5711	34	587	nucleotide metabolic process	1.79291	0.991991
GO:0034605	0.635192	0.924856	8.60494	8	142	cellular response to heat	7.20889	0.991991
GO:0072594	0.635198	0.952129	37.6315	36	621	establishment of protein localization to organelle	1.69619	0.991991
GO:1903829	0.63545	0.941116	21.1488	20	349	positive regulation of cellular protein localization	2.98356	0.991991
GO:1905037	0.636168	0.920407	6.48401	6	107	autophagosome organization	9.52223	0.991991
GO:0016525	0.636168	0.920407	6.48401	6	107	negative regulation of angiogenesis	9.52223	0.991991
GO:2000181	0.636168	0.920407	6.48401	6	107	negative regulation of blood vessel morphogenesis	9.52223	0.991991
GO:0034249	0.636313	0.927494	10.7259	10	177	negative regulation of cellular amide metabolic process	5.79974	0.991991
GO:0097193	0.636707	0.938333	19.0884	18	315	intrinsic apoptotic signaling pathway	3.29615	0.991991
GO:0019722	0.638462	0.929217	12.8468	12	212	calcium-mediated signaling	4.85137	0.992487
GO:0071326	0.639297	0.923228	9.69571	9	160	cellular response to monosaccharide stimulus	6.38789	0.992487
GO:0071331	0.639297	0.923228	9.69571	9	160	cellular response to hexose stimulus	6.38789	0.992487
GO:0030218	0.639297	0.923228	9.69571	9	160	erythrocyte differentiation	6.38789	0.992487
GO:1903844	0.639502	0.919011	7.57477	7	125	regulation of cellular response to transforming growth factor beta stimulus	8.14016	0.992487
GO:0021549	0.639502	0.919011	7.57477	7	125	cerebellum development	8.14016	0.992487
GO:0043408	0.641011	0.952827	44.9033	43	741	regulation of MAPK cascade	1.42294	0.994188
GO:0043281	0.642866	0.927691	13.9376	13	230	regulation of cysteine-type endopeptidase activity involved in apoptotic process	4.46522	0.995263
GO:0060021	0.643097	0.911416	5.45384	5	90	roof of mouth development	11.216	0.995263
GO:0098869	0.643097	0.911416	5.45384	5	90	cellular oxidant detoxification	11.216	0.995263
GO:0071322	0.64336	0.921909	10.7865	10	178	cellular response to carbohydrate stimulus	5.73476	0.995263
GO:0043270	0.644263	0.951075	43.9337	42	725	positive regulation of ion transport	1.45187	0.995378
GO:0007346	0.644263	0.951075	43.9337	42	725	regulation of mitotic cell cycle	1.45187	0.995378
GO:1901343	0.645153	0.91132	6.5446	6	108	negative regulation of vasculature development	9.34671	0.995474
GO:0002698	0.645153	0.91132	6.5446	6	108	negative regulation of immune effector process	9.34671	0.995474
GO:0043433	0.647362	0.920815	11.8772	11	196	negative regulation of DNA-binding transcription factor activity	5.20278	0.998241
GO:0033365	0.648802	0.956308	64.4765	62	1064	protein localization to organelle	0.995092	0.99982
GO:0050803	0.651267	0.92522	16.1191	15	266	regulation of synapse structure or activity	3.85197	1
GO:0060420	0.652781	0.900755	5.51443	5	91	regulation of heart growth	10.9709	1
GO:0097194	0.652781	0.900755	5.51443	5	91	execution phase of apoptosis	10.9709	1
GO:1901992	0.652781	0.900755	5.51443	5	91	positive regulation of mitotic cell cycle phase transition	10.9709	1
GO:1902476	0.652781	0.900755	5.51443	5	91	chloride transmembrane transport	10.9709	1
GO:0007589	0.652781	0.900755	5.51443	5	91	body fluid secretion	10.9709	1
GO:0072655	0.653961	0.911032	9.81691	9	162	establishment of protein localization to mitochondrion	6.23114	1
GO:0051099	0.653987	0.9158	11.9378	11	197	positive regulation of binding	5.15009	1
GO:0042147	0.654003	0.902409	6.6052	6	109	retrograde transport, endosome to Golgi	9.176	1
GO:0072384	0.654003	0.902409	6.6052	6	109	organelle transport along microtubule	9.176	1
GO:0006753	0.654372	0.942477	35.8741	34	592	nucleoside phosphate metabolic process	1.76275	1
GO:0097191	0.656961	0.921483	16.1797	15	267	extrinsic apoptotic signaling pathway	3.82317	1
GO:0009408	0.65723	0.910935	10.9077	10	180	response to heat	5.60802	1
GO:0045937	0.66097	0.952394	65.749	63	1085	positive regulation of phosphate metabolic process	0.97238	1
GO:0010562	0.66097	0.952394	65.749	63	1085	positive regulation of phosphorus metabolic process	0.97238	1
GO:0046683	0.661165	0.905053	9.8775	9	163	response to organophosphorus	6.15492	1
GO:0051952	0.662296	0.89034	5.57503	5	92	regulation of amine transport	10.7337	1
GO:0051153	0.662296	0.89034	5.57503	5	92	regulation of striated muscle cell differentiation	10.7337	1
GO:1990542	0.662715	0.89367	6.6658	6	110	mitochondrial transmembrane transport	9.00992	1
GO:0010595	0.664073	0.896038	7.75657	7	128	positive regulation of endothelial cell migration	7.76306	1
GO:0048017	0.664725	0.914454	15.2101	14	251	inositol lipid-mediated signaling	4.03771	1
GO:0007600	0.664896	0.931077	27.754	26	458	sensory perception	2.25215	1
GO:1900180	0.665998	0.897798	8.84733	8	146	regulation of protein localization to nucleus	6.81929	1
GO:0071900	0.666736	0.934602	32.9654	31	544	regulation of protein serine/threonine kinase activity	1.90335	1
GO:0006665	0.66703	0.90593	12.059	11	199	sphingolipid metabolic process	5.04709	1
GO:0043401	0.670064	0.906235	13.1498	12	217	steroid hormone mediated signaling pathway	4.63038	1
GO:0050769	0.671617	0.913776	17.3917	16	287	positive regulation of neurogenesis	3.52948	1
GO:0048588	0.671617	0.913776	17.3917	16	287	developmental cell growth	3.52948	1
GO:0071868	0.67164	0.880161	5.63563	5	93	cellular response to monoamine stimulus	10.5041	1
GO:0071870	0.67164	0.880161	5.63563	5	93	cellular response to catecholamine stimulus	10.5041	1
GO:0033138	0.67164	0.880161	5.63563	5	93	positive regulation of peptidyl-serine phosphorylation	10.5041	1
GO:0030219	0.67164	0.880161	5.63563	5	93	megakaryocyte differentiation	10.5041	1
GO:0051453	0.67164	0.880161	5.63563	5	93	regulation of intracellular pH	10.5041	1
GO:0006006	0.673122	0.906479	14.2406	13	235	glucose metabolic process	4.27723	1
GO:0033002	0.673122	0.906479	14.2406	13	235	muscle cell proliferation	4.27723	1
GO:0048585	0.673268	0.957119	105.804	102	1746	negative regulation of response to stimulus	0.607948	1
GO:0007033	0.673445	0.901074	12.1196	11	200	vacuole organization	4.99675	1
GO:0071901	0.673451	0.891277	8.90793	8	147	negative regulation of protein serine/threonine kinase activity	6.72683	1
GO:0007009	0.673451	0.891277	8.90793	8	147	plasma membrane organization	6.72683	1
GO:0008037	0.675307	0.893324	9.9987	9	165	cell recognition	6.00661	1
GO:0030879	0.675307	0.893324	9.9987	9	165	mammary gland development	6.00661	1
GO:0007568	0.676619	0.915857	20.6034	19	340	aging	2.98642	1
GO:2001243	0.679723	0.876686	6.787	6	112	negative regulation of intrinsic apoptotic signaling pathway	8.69101	1
GO:1990748	0.679723	0.876686	6.787	6	112	cellular detoxification	8.69101	1
GO:0098661	0.679723	0.876686	6.787	6	112	inorganic anion transmembrane transport	8.69101	1
GO:0007338	0.679723	0.876686	6.787	6	112	single fertilization	8.69101	1
GO:0007156	0.679873	0.881345	7.87776	7	130	homophilic cell adhesion via plasma membrane adhesion molecules	7.52604	1
GO:0032868	0.681517	0.912948	20.664	19	341	response to insulin	2.96893	1
GO:0010001	0.681829	0.902832	15.3919	14	254	glial cell differentiation	3.9429	1
GO:0031345	0.682256	0.897353	13.271	12	219	negative regulation of cell projection organization	4.54619	1
GO:0032268	0.682437	0.96092	156.828	152	2588	regulation of cellular protein metabolic process	0.412354	1
GO:0050878	0.683067	0.925887	32.1776	30	531	regulation of body fluid levels	1.93325	1
GO:0006814	0.686059	0.891513	12.2408	11	202	sodium ion transport	4.89829	1
GO:0048706	0.687595	0.874176	7.93836	7	131	embryonic skeletal system development	7.41157	1
GO:0035383	0.688016	0.868432	6.84759	6	113	thioester metabolic process	8.53787	1
GO:0006637	0.688016	0.868432	6.84759	6	113	acyl-CoA metabolic process	8.53787	1
GO:0007229	0.688016	0.868432	6.84759	6	113	integrin-mediated signaling pathway	8.53787	1
GO:1990138	0.688252	0.892977	13.3316	12	220	neuron projection extension	4.50496	1
GO:0008286	0.689089	0.881893	10.1199	9	167	insulin receptor signaling pathway	5.8636	1
GO:0009144	0.689811	0.860482	5.75683	5	95	purine nucleoside triphosphate metabolic process	10.0665	1
GO:1902904	0.690531	0.884599	11.2107	10	185	negative regulation of supramolecular fiber organization	5.30898	1
GO:0001568	0.691682	0.934402	49.9329	47	824	blood vessel development	1.25776	1
GO:0022037	0.695196	0.867122	7.99896	7	132	metencephalon development	7.2997	1
GO:0008584	0.695196	0.867122	7.99896	7	132	male gonad development	7.2997	1
GO:0008585	0.696167	0.860331	6.90819	6	114	female gonad development	8.38873	1
GO:0060271	0.696969	0.907254	22.9667	21	379	cilium assembly	2.65641	1
GO:0034762	0.698619	0.918289	32.42	30	535	regulation of transmembrane transport	1.90445	1
GO:0043462	0.698636	0.850967	5.81743	5	96	regulation of ATPase activity	9.85786	1
GO:0048593	0.702232	0.866104	9.15033	8	151	camera-type eye morphogenesis	6.37516	1
GO:0048675	0.702505	0.870748	10.2411	9	169	axon extension	5.72564	1
GO:0008203	0.702505	0.870748	10.2411	9	169	cholesterol metabolic process	5.72564	1
GO:0046546	0.702677	0.86018	8.05956	7	133	development of primary male sexual characteristics	7.19034	1
GO:0070647	0.703778	0.939614	72.839	69	1202	protein modification by small protein conjugation or removal	0.867751	1
GO:0034404	0.704174	0.852379	6.96879	6	115	nucleobase-containing small molecule biosynthetic process	8.24348	1
GO:0042391	0.705357	0.907274	26.239	24	433	regulation of membrane potential	2.3259	1
GO:0051216	0.705833	0.880095	13.5134	12	223	cartilage development	4.38456	1
GO:0001944	0.706835	0.929468	52.2962	49	863	vasculature development	1.19544	1
GO:0071867	0.707286	0.841658	5.87802	5	97	response to monoamine	9.65565	1
GO:0071869	0.707286	0.841658	5.87802	5	97	response to catecholamine	9.65565	1
GO:0006914	0.707344	0.917158	35.6923	33	589	autophagy	1.72838	1
GO:0061919	0.707344	0.917158	35.6923	33	589	process utilizing autophagic mechanism	1.72838	1
GO:0044344	0.709165	0.860029	9.21092	8	152	cellular response to fibroblast growth factor stimulus	6.29155	1
GO:0062013	0.709165	0.860029	9.21092	8	152	positive regulation of small molecule metabolic process	6.29155	1
GO:0019079	0.710035	0.853348	8.12016	7	134	viral genome replication	7.08343	1
GO:0042493	0.710763	0.907245	28.4205	26	469	response to drug	2.14774	1
GO:0001649	0.711066	0.885688	16.7857	15	277	osteoblast differentiation	3.55211	1
GO:1901655	0.712037	0.844571	7.02939	6	116	cellular response to ketone	8.10196	1
GO:0007050	0.71294	0.878337	14.6648	13	242	cell cycle arrest	4.03337	1
GO:0046883	0.713019	0.887073	17.8765	16	295	regulation of hormone secretion	3.34065	1
GO:0051174	0.713358	0.945297	105.865	101	1747	regulation of phosphorus metabolic process	0.601299	1
GO:0009410	0.715761	0.83255	5.93862	5	98	response to xenobiotic stimulus	9.4596	1
GO:0006690	0.715761	0.83255	5.93862	5	98	icosanoid metabolic process	9.4596	1
GO:0060078	0.715992	0.854038	9.27152	8	153	regulation of postsynaptic membrane potential	6.20958	1
GO:0071383	0.717965	0.883843	17.9371	16	296	cellular response to steroid hormone stimulus	3.31812	1
GO:0046364	0.719756	0.836904	7.08999	6	117	monosaccharide biosynthetic process	7.96406	1
GO:0032526	0.719756	0.836904	7.08999	6	117	response to retinoic acid	7.96406	1
GO:0030334	0.722199	0.929314	63.9917	60	1056	regulation of cell migration	0.977639	1
GO:0031667	0.722333	0.905259	31.7534	29	524	response to nutrient levels	1.91907	1
GO:0046661	0.722712	0.848129	9.33212	8	154	male sex differentiation	6.1292	1
GO:0050714	0.722712	0.848129	9.33212	8	154	positive regulation of protein secretion	6.1292	1
GO:0051247	0.722769	0.94107	99.987	95	1650	positive regulation of protein metabolic process	0.634031	1
GO:1901606	0.72406	0.823636	5.99922	5	99	alpha-amino acid catabolic process	9.26946	1
GO:0000018	0.72406	0.823636	5.99922	5	99	regulation of DNA recombination	9.26946	1
GO:0030641	0.72406	0.823636	5.99922	5	99	regulation of cellular pH	9.26946	1
GO:0050730	0.72624	0.875476	16.9675	15	280	regulation of peptidyl-tyrosine phosphorylation	3.4764	1
GO:0031401	0.726913	0.930294	70.2939	66	1160	positive regulation of protein modification process	0.891216	1
GO:0032147	0.72773	0.889413	23.3909	21	386	activation of protein kinase activity	2.56094	1
GO:0014065	0.727778	0.854915	11.5743	10	191	phosphatidylinositol 3-kinase signaling	4.98067	1
GO:0050796	0.727849	0.859573	12.665	11	209	regulation of insulin secretion	4.57567	1
GO:0030324	0.727849	0.859573	12.665	11	209	lung development	4.57567	1
GO:0034101	0.728212	0.849272	10.4835	9	173	erythrocyte homeostasis	5.46393	1
GO:0032270	0.72846	0.937985	95.0179	90	1568	positive regulation of cellular protein metabolic process	0.665128	1
GO:0034765	0.729713	0.901486	31.8746	29	526	regulation of ion transmembrane transport	1.9045	1
GO:0006163	0.730369	0.896799	28.7235	26	474	purine nucleotide metabolic process	2.10267	1
GO:0045727	0.731374	0.83348	8.30195	7	137	positive regulation of translation	6.7766	1
GO:0035725	0.731374	0.83348	8.30195	7	137	sodium ion transmembrane transport	6.7766	1
GO:0032368	0.731374	0.83348	8.30195	7	137	regulation of lipid transport	6.7766	1
GO:0048640	0.731374	0.83348	8.30195	7	137	negative regulation of developmental growth	6.7766	1
GO:0016049	0.73203	0.901628	32.9654	30	544	cell growth	1.84195	1
GO:0042472	0.732184	0.814909	6.05982	5	100	inner ear morphogenesis	9.085	1
GO:0140056	0.733513	0.855193	12.7256	11	210	organelle localization by membrane tethering	4.5322	1
GO:0009150	0.733872	0.891562	26.6632	24	440	purine ribonucleotide metabolic process	2.25248	1
GO:0071824	0.73429	0.863016	14.9072	13	246	protein-DNA complex subunit organization	3.90327	1
GO:0006664	0.73476	0.821977	7.21118	6	119	glycolipid metabolic process	7.69861	1
GO:1903509	0.73476	0.821977	7.21118	6	119	liposaccharide metabolic process	7.69861	1
GO:0034504	0.737221	0.871148	18.1795	16	300	protein localization to nucleus	3.23022	1
GO:0051248	0.73745	0.925063	67.4458	63	1113	negative regulation of protein metabolic process	0.924071	1
GO:0009566	0.738241	0.82706	8.36255	7	138	fertilization	6.67874	1
GO:0019935	0.740133	0.806365	6.12042	5	101	cyclic-nucleotide-mediated signaling	8.90599	1
GO:0044782	0.740314	0.881974	23.5727	21	389	cilium organization	2.52159	1
GO:2001236	0.740496	0.838922	10.6047	9	175	regulation of extrinsic apoptotic signaling pathway	5.33976	1
GO:0009719	0.741292	0.937319	108.713	103	1794	response to endogenous stimulus	0.581497	1
GO:0097237	0.742045	0.81471	7.27178	6	120	cellular response to toxic substance	7.57083	1
GO:0010212	0.742227	0.830878	9.51391	8	157	response to ionizing radiation	5.8972	1
GO:0010811	0.742227	0.830878	9.51391	8	157	positive regulation of cell-substrate adhesion	5.8972	1
GO:0051321	0.744606	0.846565	12.8468	11	212	meiotic cell cycle	4.44709	1
GO:0010976	0.745255	0.8408	11.756	10	194	positive regulation of neuron projection development	4.82782	1
GO:0006417	0.746048	0.880727	24.7241	22	408	regulation of translation	2.40136	1
GO:0001889	0.746494	0.83384	10.6653	9	176	liver development	5.27925	1
GO:0043434	0.747646	0.892188	32.1776	29	531	response to peptide hormone	1.8688	1
GO:0060964	0.747908	0.797996	6.18101	5	102	regulation of gene silencing by miRNA	8.73222	1
GO:0006415	0.747908	0.797996	6.18101	5	102	translational termination	8.73222	1
GO:0019932	0.748644	0.869475	20.4822	18	338	second-messenger-mediated signaling	2.86282	1
GO:0090174	0.749185	0.807569	7.33238	6	121	organelle membrane fusion	7.44621	1
GO:0046545	0.749185	0.807569	7.33238	6	121	development of primary female sexual characteristics	7.44621	1
GO:0019218	0.749185	0.807569	7.33238	6	121	regulation of steroid metabolic process	7.44621	1
GO:0021761	0.749185	0.807569	7.33238	6	121	limbic system development	7.44621	1
GO:0030323	0.750035	0.842315	12.9074	11	213	respiratory tube development	4.40543	1
GO:0032271	0.750397	0.85896	17.2705	15	285	regulation of protein polymerization	3.35549	1
GO:0021537	0.751102	0.86186	18.3612	16	303	telencephalon development	3.16657	1
GO:0002062	0.751603	0.814509	8.48375	7	140	chondrocyte differentiation	6.48929	1
GO:0002793	0.752397	0.828819	10.7259	9	177	positive regulation of peptide secretion	5.21976	1
GO:0000302	0.754588	0.848211	15.1495	13	250	response to reactive oxygen species	3.77936	1
GO:0071774	0.754698	0.819759	9.63511	8	159	response to fibroblast growth factor	5.74977	1
GO:0002040	0.754698	0.819759	9.63511	8	159	sprouting angiogenesis	5.74977	1
GO:0035239	0.754849	0.91448	60.5982	56	1000	tube morphogenesis	1.01752	1
GO:0021700	0.755056	0.85573	17.3311	15	286	developmental maturation	3.33207	1
GO:0002027	0.755509	0.789798	6.24161	5	103	regulation of heart rate	8.56348	1
GO:1901890	0.755509	0.789798	6.24161	5	103	positive regulation of cell junction assembly	8.56348	1
GO:0035249	0.755509	0.789798	6.24161	5	103	synaptic transmission, glutamatergic	8.56348	1
GO:0009063	0.756181	0.800551	7.39298	6	122	cellular amino acid catabolic process	7.32464	1
GO:0023061	0.758249	0.889573	34.4804	31	569	signal release	1.73977	1
GO:1901653	0.760644	0.876371	27.0874	24	447	cellular response to peptide	2.18248	1
GO:0007626	0.760658	0.83394	13.0286	11	215	locomotory behavior	4.32385	1
GO:0007034	0.760772	0.814308	9.69571	8	160	vacuolar transport	5.67812	1
GO:0030004	0.763034	0.793653	7.45358	6	123	cellular monovalent inorganic cation homeostasis	7.20603	1
GO:2000278	0.763034	0.793653	7.45358	6	123	regulation of DNA biosynthetic process	7.20603	1
GO:0010506	0.763304	0.865583	22.8455	20	377	regulation of autophagy	2.55683	1
GO:0051640	0.765723	0.899846	47.2666	43	780	organelle localization	1.2842	1
GO:0030216	0.766738	0.80893	9.75631	8	161	keratinocyte differentiation	5.60781	1
GO:0016477	0.766787	0.926712	100.229	94	1654	cell migration	0.624327	1
GO:0009755	0.769114	0.837432	15.3313	13	253	hormone-mediated signaling pathway	3.69026	1
GO:0001678	0.769529	0.814107	10.9077	9	180	cellular glucose homeostasis	5.04722	1
GO:0043648	0.769743	0.786873	7.51417	6	124	dicarboxylic acid metabolic process	7.09027	1
GO:0006476	0.770195	0.773894	6.36281	5	105	protein deacetylation	8.24036	1
GO:0044770	0.772019	0.890471	41.0856	37	678	cell cycle phase transition	1.4625	1
GO:0000723	0.772597	0.803621	9.81691	8	162	telomere maintenance	5.53879	1
GO:0043409	0.772658	0.818269	12.059	10	199	negative regulation of MAPK cascade	4.58827	1
GO:0060284	0.772869	0.883419	35.8135	32	591	regulation of cell development	1.66468	1
GO:0046165	0.775049	0.809317	10.9683	9	181	alcohol biosynthetic process	4.99161	1
GO:0061008	0.775049	0.809317	10.9683	9	181	hepaticobiliary system development	4.99161	1
GO:0010821	0.775049	0.809317	10.9683	9	181	regulation of mitochondrion organization	4.99161	1
GO:0022408	0.775049	0.809317	10.9683	9	181	negative regulation of cell-cell adhesion	4.99161	1
GO:0009991	0.7762	0.878566	33.7532	30	557	response to extracellular stimulus	1.75698	1
GO:0033865	0.77685	0.790507	8.72614	7	144	nucleoside bisphosphate metabolic process	6.13378	1
GO:0033875	0.77685	0.790507	8.72614	7	144	ribonucleoside bisphosphate metabolic process	6.13378	1
GO:0034032	0.77685	0.790507	8.72614	7	144	purine nucleoside bisphosphate metabolic process	6.13378	1
GO:0060147	0.777281	0.766179	6.42341	5	106	regulation of posttranscriptional gene silencing	8.08562	1
GO:2001257	0.778348	0.79838	9.8775	8	163	regulation of cation channel activity	5.47104	1
GO:1903322	0.778348	0.79838	9.8775	8	163	positive regulation of protein modification by small protein conjugation or removal	5.47104	1
GO:1901652	0.779051	0.883062	38.0557	34	628	response to peptide	1.56644	1
GO:0009749	0.779481	0.824522	14.3618	12	237	response to glucose	3.88186	1
GO:0009743	0.781795	0.83684	17.6947	15	292	response to carbohydrate	3.19654	1
GO:0050890	0.781795	0.83684	17.6947	15	292	cognition	3.19654	1
GO:0032269	0.782864	0.904967	64.4159	59	1063	negative regulation of cellular protein metabolic process	0.948725	1
GO:0006813	0.783015	0.809588	12.1802	10	201	potassium ion transport	4.49741	1
GO:0031056	0.783993	0.793207	9.9381	8	164	regulation of histone modification	5.40452	1
GO:0042058	0.784198	0.758614	6.48401	5	107	regulation of epidermal growth factor receptor signaling pathway	7.93519	1
GO:0060966	0.784198	0.758614	6.48401	5	107	regulation of gene silencing by RNA	7.93519	1
GO:0045185	0.784198	0.758614	6.48401	5	107	maintenance of protein location	7.93519	1
GO:0030100	0.784202	0.820816	14.4224	12	238	regulation of endocytosis	3.8493	1
GO:1902652	0.785801	0.799903	11.0895	9	183	secondary alcohol metabolic process	4.8831	1
GO:0048167	0.788065	0.805315	12.2408	10	202	regulation of synaptic plasticity	4.45299	1
GO:0043244	0.788741	0.779024	8.84733	7	146	regulation of protein-containing complex disassembly	5.96688	1
GO:0006414	0.788741	0.779024	8.84733	7	146	translational elongation	5.96688	1
GO:0090276	0.788852	0.817142	14.483	12	239	regulation of peptide hormone secretion	3.81716	1
GO:0010638	0.789317	0.88183	41.4492	37	684	positive regulation of organelle organization	1.43696	1
GO:0014066	0.789531	0.788099	9.9987	8	165	regulation of phosphatidylinositol 3-kinase signaling	5.33921	1
GO:0010564	0.789758	0.891631	50.9631	46	841	regulation of cell cycle process	1.18174	1
GO:0051591	0.790948	0.751197	6.5446	5	108	response to cAMP	7.78892	1
GO:0061097	0.790948	0.751197	6.5446	5	108	regulation of protein tyrosine kinase activity	7.78892	1
GO:0048592	0.791035	0.795276	11.1501	9	184	eye morphogenesis	4.83016	1
GO:0051302	0.791035	0.795276	11.1501	9	184	regulation of cell division	4.83016	1
GO:0000902	0.791292	0.908061	76.1113	70	1256	cell morphogenesis	0.806257	1
GO:0031346	0.792429	0.857562	27.6328	24	456	positive regulation of cell projection organization	2.09718	1
GO:1901136	0.793029	0.801086	12.3014	10	203	carbohydrate derivative catabolic process	4.40923	1
GO:0015698	0.794963	0.783057	10.0593	8	166	inorganic anion transport	5.27508	1
GO:0030902	0.796175	0.790702	11.2107	9	185	hindbrain development	4.77809	1
GO:0015931	0.796363	0.816662	15.6949	13	259	nucleobase-containing compound transport	3.52127	1
GO:0006821	0.797532	0.743922	6.6052	5	109	chloride transport	7.64666	1
GO:0006302	0.797935	0.809892	14.6042	12	241	double-strand break repair	3.75407	1
GO:1990778	0.798023	0.849055	25.5724	22	422	protein localization to cell periphery	2.24467	1
GO:0042593	0.799392	0.81937	16.8463	14	278	glucose homeostasis	3.2915	1
GO:0048639	0.800009	0.80202	13.5134	11	223	positive regulation of developmental growth	4.01918	1
GO:0018210	0.800151	0.767867	8.96853	7	148	peptidyl-threonine modification	5.8067	1
GO:0035305	0.801171	0.754623	7.81717	6	129	negative regulation of dephosphorylation	6.55129	1
GO:0032231	0.801171	0.754623	7.81717	6	129	regulation of actin filament bundle assembly	6.55129	1
GO:0006793	0.801756	0.934139	196.762	187	3247	phosphorus metabolic process	0.322279	1
GO:1901615	0.801887	0.866139	35.3287	31	583	organic hydroxy compound metabolic process	1.65722	1
GO:0031099	0.80237	0.806314	14.6648	12	242	regeneration	3.72311	1
GO:0009746	0.80237	0.806314	14.6648	12	242	response to hexose	3.72311	1
GO:0001843	0.803952	0.736785	6.6658	5	110	neural tube closure	7.50826	1
GO:1901879	0.803952	0.736785	6.6658	5	110	regulation of protein depolymerization	7.50826	1
GO:0010717	0.803952	0.736785	6.6658	5	110	regulation of epithelial to mesenchymal transition	7.50826	1
GO:0014068	0.803952	0.736785	6.6658	5	110	positive regulation of phosphatidylinositol 3-kinase signaling	7.50826	1
GO:0048638	0.804564	0.842012	24.6029	21	406	regulation of developmental growth	2.31485	1
GO:0022406	0.804577	0.798199	13.574	11	224	membrane docking	3.98338	1
GO:0048545	0.804805	0.844711	25.6936	22	424	response to steroid hormone	2.22354	1
GO:0061025	0.805512	0.77316	10.1805	8	168	membrane fusion	5.15023	1
GO:0032200	0.805512	0.77316	10.1805	8	168	telomere organization	5.15023	1
GO:0072521	0.806709	0.853478	30.0567	26	496	purine-containing compound metabolic process	1.92028	1
GO:0050772	0.80704	0.748485	7.87776	6	130	positive regulation of axonogenesis	6.45089	1
GO:1904064	0.80704	0.748485	7.87776	6	130	positive regulation of cation transmembrane transport	6.45089	1
GO:0033500	0.807588	0.813095	16.9675	14	280	carbohydrate homeostasis	3.24464	1
GO:0050877	0.807912	0.886914	55.6291	50	918	nervous system process	1.07805	1
GO:0060606	0.810209	0.729784	6.7264	5	111	tube closure	7.37359	1
GO:0061448	0.81035	0.815811	18.1189	15	299	connective tissue development	3.04862	1
GO:0040013	0.814987	0.828541	22.6031	19	373	negative regulation of locomotion	2.48137	1
GO:0034284	0.815248	0.795764	14.8466	12	245	response to monosaccharide	3.63249	1
GO:0097061	0.816307	0.722913	6.787	5	112	dendritic spine organization	7.24251	1
GO:0061640	0.816307	0.722913	6.787	5	112	cytoskeleton-dependent cytokinesis	7.24251	1
GO:0055017	0.816307	0.722913	6.787	5	112	cardiac muscle tissue growth	7.24251	1
GO:2000145	0.816814	0.891807	67.4458	61	1113	regulation of cell motility	0.894735	1
GO:0071417	0.817194	0.868653	43.1459	38	712	cellular response to organonitrogen compound	1.362	1
GO:2001234	0.817249	0.800112	15.9979	13	264	negative regulation of apoptotic signaling pathway	3.38915	1
GO:0043666	0.818372	0.736501	7.99896	6	132	regulation of phosphoprotein phosphatase activity	6.25689	1
GO:0030534	0.818372	0.736501	7.99896	6	132	adult behavior	6.25689	1
GO:0071495	0.819233	0.90444	92.594	85	1528	cellular response to endogenous stimulus	0.661496	1
GO:0001505	0.819424	0.803857	17.1493	14	283	regulation of neurotransmitter levels	3.17622	1
GO:0007224	0.821552	0.746475	9.21092	7	152	smoothened signaling pathway	5.50511	1
GO:0055002	0.821552	0.746475	9.21092	7	152	striated muscle cell development	5.50511	1
GO:0048562	0.821726	0.807112	18.3007	15	302	embryonic organ morphogenesis	2.98836	1
GO:0046620	0.822246	0.716169	6.84759	5	113	regulation of organ growth	7.11489	1
GO:0048678	0.822246	0.716169	6.84759	5	113	response to axon injury	7.11489	1
GO:0031589	0.824191	0.831933	26.0572	22	430	cell-substrate adhesion	2.16193	1
GO:0035264	0.825056	0.764314	11.5743	9	191	multicellular organism growth	4.48261	1
GO:0006611	0.825056	0.764314	11.5743	9	191	protein export from nucleus	4.48261	1
GO:0021915	0.825056	0.764314	11.5743	9	191	neural tube development	4.48261	1
GO:0006796	0.825197	0.926966	194.763	184	3214	phosphate-containing compound metabolic process	0.323654	1
GO:0048284	0.826613	0.741311	9.27152	7	153	organelle fusion	5.43338	1
GO:0090066	0.826933	0.851692	35.8741	31	592	regulation of anatomical structure size	1.60721	1
GO:0097190	0.827089	0.858665	40.1766	35	663	apoptotic signaling pathway	1.44676	1
GO:0033674	0.827096	0.863277	43.3883	38	716	positive regulation of kinase activity	1.34683	1
GO:0098876	0.82803	0.709549	6.90819	5	114	vesicle-mediated transport to the plasma membrane	6.99061	1
GO:0006906	0.82803	0.709549	6.90819	5	114	vesicle fusion	6.99061	1
GO:0048709	0.82803	0.709549	6.90819	5	114	oligodendrocyte differentiation	6.99061	1
GO:0007286	0.82803	0.709549	6.90819	5	114	spermatid development	6.99061	1
GO:0010923	0.82803	0.709549	6.90819	5	114	negative regulation of phosphatase activity	6.99061	1
GO:0022898	0.828998	0.790495	16.1797	13	267	regulation of transmembrane transporter activity	3.31341	1
GO:0071560	0.828998	0.790495	16.1797	13	267	cellular response to transforming growth factor beta stimulus	3.31341	1
GO:0048872	0.829026	0.801414	18.4218	15	304	homeostasis of number of cells	2.94916	1
GO:0031398	0.829173	0.724892	8.12016	6	134	positive regulation of protein ubiquitination	6.07151	1
GO:0035637	0.829549	0.760084	11.6349	9	192	multicellular organismal signaling	4.43604	1
GO:0030048	0.829549	0.760084	11.6349	9	192	actin filament-based movement	4.43604	1
GO:0010921	0.829549	0.760084	11.6349	9	192	regulation of phosphatase activity	4.43604	1
GO:0048839	0.829709	0.76877	12.7862	10	211	inner ear development	4.08122	1
GO:0003012	0.830368	0.838714	30.5415	26	504	muscle system process	1.8598	1
GO:0006066	0.830611	0.824402	25.0876	21	414	alcohol metabolic process	2.22625	1
GO:0043624	0.831437	0.782113	15.0889	12	249	cellular protein complex disassembly	3.51672	1
GO:0045444	0.831437	0.782113	15.0889	12	249	fat cell differentiation	3.51672	1
GO:1902600	0.831561	0.736216	9.33212	7	154	proton transmembrane transport	5.36305	1
GO:0051028	0.831561	0.736216	9.33212	7	154	mRNA transport	5.36305	1
GO:0040012	0.8333	0.885818	70.0515	63	1156	regulation of locomotion	0.856603	1
GO:0031644	0.834377	0.719222	8.18075	6	135	regulation of nervous system process	5.98189	1
GO:0010469	0.834377	0.719222	8.18075	6	135	regulation of signaling receptor activity	5.98189	1
GO:1904019	0.834377	0.719222	8.18075	6	135	epithelial cell apoptotic process	5.98189	1
GO:0060541	0.834418	0.772421	13.9982	11	231	respiratory system development	3.74562	1
GO:0042325	0.835101	0.89758	92.1092	84	1520	regulation of phosphorylation	0.660613	1
GO:0033043	0.835478	0.892649	82.7165	75	1365	regulation of organelle organization	0.731393	1
GO:0006839	0.836102	0.795793	18.543	15	306	mitochondrial transport	2.91074	1
GO:0051347	0.836153	0.86514	48.9633	43	808	positive regulation of transferase activity	1.19674	1
GO:0071897	0.838054	0.761089	12.9074	10	213	DNA biosynthetic process	4.00494	1
GO:0007179	0.838054	0.761089	12.9074	10	213	transforming growth factor beta receptor signaling pathway	4.00494	1
GO:0009266	0.839118	0.775459	15.2101	12	251	response to temperature stimulus	3.4609	1
GO:1901184	0.839138	0.696668	7.02939	5	116	regulation of ERBB signaling pathway	6.75163	1
GO:0035601	0.839138	0.696668	7.02939	5	116	protein deacylation	6.75163	1
GO:0007088	0.839138	0.696668	7.02939	5	116	regulation of mitotic nuclear division	6.75163	1
GO:0007569	0.839138	0.696668	7.02939	5	116	cell aging	6.75163	1
GO:0006606	0.841121	0.726233	9.45332	7	156	protein import into nucleus	5.22641	1
GO:0030522	0.841309	0.796619	19.755	16	326	intracellular receptor signaling pathway	2.73552	1
GO:0120039	0.841376	0.863578	50.1753	44	828	plasma membrane bounded cell projection morphogenesis	1.16613	1
GO:0017038	0.842107	0.757305	12.968	10	214	protein import	3.9676	1
GO:0010942	0.843505	0.854021	43.8125	38	723	positive regulation of cell death	1.32088	1
GO:0046822	0.844404	0.708143	8.30195	6	137	regulation of nucleocytoplasmic transport	5.80851	1
GO:0009116	0.844468	0.690399	7.08999	5	117	nucleoside metabolic process	6.63672	1
GO:0014020	0.844468	0.690399	7.08999	5	117	primary neural tube formation	6.63672	1
GO:0016197	0.844936	0.783082	17.5735	14	290	endosomal transport	3.02473	1
GO:0032412	0.846529	0.768916	15.3313	12	253	regulation of ion transmembrane transporter activity	3.4064	1
GO:0021953	0.846635	0.743617	11.8772	9	196	central nervous system neuron differentiation	4.25682	1
GO:0007548	0.847306	0.774961	16.4827	13	272	sex differentiation	3.19272	1
GO:0034614	0.847937	0.731525	10.7259	8	177	cellular response to reactive oxygen species	4.63979	1
GO:0016241	0.847937	0.731525	10.7259	8	177	regulation of macroautophagy	4.63979	1
GO:0010634	0.847937	0.731525	10.7259	8	177	positive regulation of epithelial cell migration	4.63979	1
GO:0061337	0.84923	0.702729	8.36255	6	138	cardiac conduction	5.72464	1
GO:0046879	0.849461	0.794853	21.0276	17	347	hormone secretion	2.56534	1
GO:0030154	0.849486	0.925918	252.088	239	4160	cell differentiation	0.250938	1
GO:0042471	0.849651	0.684242	7.15059	5	118	ear morphogenesis	6.52471	1
GO:0098732	0.849651	0.684242	7.15059	5	118	macromolecule deacylation	6.52471	1
GO:0007368	0.849651	0.684242	7.15059	5	118	determination of left/right symmetry	6.52471	1
GO:0048858	0.849789	0.858943	50.4177	44	832	cell projection morphogenesis	1.15494	1
GO:0007169	0.850524	0.859811	51.5085	45	850	transmembrane receptor protein tyrosine kinase signaling pathway	1.1317	1
GO:0043112	0.850689	0.73961	11.9378	9	197	receptor metabolic process	4.21371	1
GO:0065003	0.851312	0.896741	106.289	97	1754	protein-containing complex assembly	0.572885	1
GO:0051170	0.85216	0.727171	10.7865	8	178	import into nucleus	4.5878	1
GO:0051128	0.853369	0.91187	161.252	150	2661	regulation of cellular component organization	0.384908	1
GO:0016051	0.853674	0.76248	15.4525	12	255	carbohydrate biosynthetic process	3.35317	1
GO:0008406	0.853791	0.746172	13.1498	10	217	gonad development	3.85865	1
GO:0008637	0.853933	0.697397	8.42315	6	139	apoptotic mitochondrial changes	5.64257	1
GO:0019220	0.854532	0.894967	105.38	96	1739	regulation of phosphate metabolic process	0.576802	1
GO:0033273	0.85469	0.678192	7.21118	5	119	response to vitamin	6.41551	1
GO:0006091	0.856612	0.826315	33.329	28	550	generation of precursor metabolites and energy	1.68185	1
GO:0031400	0.857078	0.837015	38.7828	33	640	negative regulation of protein modification process	1.46389	1
GO:1902115	0.857531	0.742533	13.2104	10	218	regulation of organelle assembly	3.82333	1
GO:0007269	0.857531	0.742533	13.2104	10	218	neurotransmitter secretion	3.82333	1
GO:0099643	0.857531	0.742533	13.2104	10	218	signal release from synapse	3.82333	1
GO:0046887	0.858515	0.692144	8.48375	6	140	positive regulation of hormone secretion	5.56224	1
GO:0071478	0.858542	0.731722	12.059	9	199	cellular response to radiation	4.12944	1
GO:0048869	0.85873	0.923447	256.694	243	4236	cellular developmental process	0.246065	1
GO:0017148	0.858938	0.707048	9.69571	7	160	negative regulation of translation	4.96836	1
GO:0007005	0.858947	0.829455	35.5711	30	587	mitochondrion organization	1.58198	1
GO:0060419	0.859587	0.672248	7.27178	5	120	heart growth	6.30903	1
GO:1901699	0.859674	0.847571	46.4182	40	766	cellular response to nitrogen compound	1.23868	1
GO:2001242	0.860323	0.718615	10.9077	8	180	regulation of intrinsic apoptotic signaling pathway	4.48642	1
GO:0071559	0.860837	0.762959	16.7251	13	276	response to transforming growth factor beta	3.10085	1
GO:0048731	0.862077	0.925557	296.507	282	4893	system development	0.21402	1
GO:0045859	0.862363	0.856859	55.0837	48	909	regulation of protein kinase activity	1.05552	1
GO:0016032	0.862679	0.867223	65.749	58	1085	viral process	0.895207	1
GO:0001932	0.86274	0.877582	79.5048	71	1312	regulation of protein phosphorylation	0.749455	1
GO:2001233	0.863127	0.796784	24.6635	20	407	regulation of apoptotic signaling pathway	2.1938	1
GO:0016079	0.863129	0.702408	9.75631	7	161	synaptic vesicle exocytosis	4.90683	1
GO:1903320	0.864069	0.760016	16.7857	13	277	regulation of protein modification by small protein conjugation or removal	3.0785	1
GO:0051928	0.864346	0.666406	7.33238	5	121	positive regulation of calcium ion transport	6.20518	1
GO:0097711	0.864346	0.666406	7.33238	5	121	ciliary basal body-plasma membrane docking	6.20518	1
GO:0007292	0.864346	0.666406	7.33238	5	121	female gamete generation	6.20518	1
GO:0051146	0.864352	0.782713	21.3306	17	352	striated muscle cell differentiation	2.49298	1
GO:0009914	0.867189	0.780328	21.3912	17	353	hormone transport	2.47887	1
GO:0035304	0.867217	0.697827	9.81691	7	162	regulation of protein dephosphorylation	4.84644	1
GO:0051147	0.867217	0.697827	9.81691	7	162	regulation of muscle cell differentiation	4.84644	1
GO:0043149	0.867323	0.68187	8.60494	6	142	stress fiber assembly	5.40667	1
GO:0030038	0.867323	0.68187	8.60494	6	142	contractile actin filament bundle assembly	5.40667	1
GO:0042060	0.867995	0.823304	35.8135	30	591	wound healing	1.56063	1
GO:2001237	0.868968	0.660664	7.39298	5	122	negative regulation of extrinsic apoptotic signaling pathway	6.10387	1
GO:0021543	0.869698	0.720196	12.2408	9	202	pallium development	4.0077	1
GO:0044092	0.870066	0.866004	69.2031	61	1142	negative regulation of molecular function	0.84987	1
GO:0048812	0.872262	0.842908	48.9633	42	808	neuron projection morphogenesis	1.16891	1
GO:0043588	0.873413	0.751317	16.9675	13	280	skin development	3.01288	1
GO:0010810	0.873413	0.751317	16.9675	13	280	regulation of cell-substrate adhesion	3.01288	1
GO:0014070	0.873647	0.860308	65.0824	57	1074	response to organic cyclic compound	0.897886	1
GO:0051270	0.873951	0.866506	72.536	64	1197	regulation of cellular component movement	0.811609	1
GO:0003018	0.875557	0.702086	11.1501	8	184	vascular process in circulatory system	4.29348	1
GO:0003014	0.875672	0.671894	8.72614	6	144	renal system process	5.25752	1
GO:0032409	0.876411	0.748461	17.0281	13	281	regulation of transporter activity	2.99148	1
GO:0006469	0.876652	0.740765	15.8767	12	262	negative regulation of protein kinase activity	3.17639	1
GO:0043393	0.877282	0.731851	14.7254	11	243	regulation of protein binding	3.38482	1
GO:1903510	0.877815	0.64947	7.51417	5	124	mucopolysaccharide metabolic process	5.90856	1
GO:0000904	0.878878	0.848405	56.7199	49	936	cell morphogenesis involved in differentiation	1.01625	1
GO:1902806	0.879145	0.69807	11.2107	8	185	regulation of cell cycle G1/S phase transition	4.24719	1
GO:0033673	0.879353	0.745626	17.0887	13	282	negative regulation of kinase activity	2.9703	1
GO:0031399	0.879633	0.884694	108.592	98	1792	regulation of protein modification process	0.554504	1
GO:0031396	0.881625	0.718004	13.6346	10	225	regulation of protein ubiquitination	3.58914	1
GO:0050770	0.881625	0.718004	13.6346	10	225	regulation of axonogenesis	3.58914	1
GO:0007584	0.881625	0.718004	13.6346	10	225	response to nutrient	3.58914	1
GO:0001841	0.882044	0.644013	7.57477	5	125	neural tube formation	5.8144	1
GO:0006835	0.882044	0.644013	7.57477	5	125	dicarboxylic acid transport	5.8144	1
GO:0010639	0.882375	0.776723	23.9969	19	396	negative regulation of organelle organization	2.2015	1
GO:0006413	0.883454	0.705375	12.4832	9	206	translational initiation	3.85357	1
GO:0045137	0.88478	0.71463	13.6952	10	226	development of primary sexual characteristics	3.55744	1
GO:0030010	0.886066	0.690174	11.3319	8	187	establishment of cell polarity	4.15682	1
GO:0010594	0.8867	0.701763	12.5438	9	207	regulation of endothelial cell migration	3.81643	1
GO:1905477	0.887366	0.657461	8.90793	6	147	positive regulation of protein localization to membrane	5.04512	1
GO:0051674	0.887373	0.880501	107.925	97	1781	localization of cell	0.555647	1
GO:0048870	0.887373	0.880501	107.925	97	1781	cell motility	0.555647	1
GO:0090596	0.887843	0.737246	17.2705	13	285	sensory organ morphogenesis	2.90809	1
GO:0051494	0.8894	0.686291	11.3925	8	188	negative regulation of cytoskeleton organization	4.11272	1
GO:0080135	0.889529	0.826655	46.297	39	764	regulation of cellular response to stress	1.21404	1
GO:0001704	0.890129	0.633367	7.69597	5	127	formation of primary germ layer	5.63271	1
GO:0001892	0.890129	0.633367	7.69597	5	127	embryonic placenta development	5.63271	1
GO:0009855	0.890129	0.633367	7.69597	5	127	determination of bilateral symmetry	5.63271	1
GO:0048515	0.890129	0.633367	7.69597	5	127	spermatid differentiation	5.63271	1
GO:0043534	0.891051	0.652785	8.96853	6	148	blood vessel endothelial cell migration	4.97717	1
GO:0043068	0.891616	0.813211	39.813	33	657	positive regulation of programmed cell death	1.38911	1
GO:0044772	0.891851	0.810749	38.7222	32	639	mitotic cell cycle phase transition	1.42398	1
GO:0060560	0.892827	0.739338	18.543	14	306	developmental growth involved in morphogenesis	2.71669	1
GO:0032984	0.893078	0.757238	21.9971	17	363	protein-containing complex disassembly	2.34418	1
GO:0046777	0.89323	0.731762	17.3917	13	287	protein autophosphorylation	2.86771	1
GO:0007167	0.893741	0.85444	72.2936	63	1193	enzyme linked receptor protein signaling pathway	0.804294	1
GO:0060968	0.893989	0.628174	7.75657	5	128	regulation of gene silencing	5.54504	1
GO:0048013	0.893989	0.628174	7.75657	5	128	ephrin receptor signaling pathway	5.54504	1
GO:0051101	0.893989	0.628174	7.75657	5	128	regulation of DNA binding	5.54504	1
GO:0009611	0.894603	0.821237	45.388	38	749	response to wounding	1.23076	1
GO:0032990	0.895143	0.831006	51.9326	44	857	cell part morphogenesis	1.08854	1
GO:0051271	0.895206	0.749605	20.9064	16	345	negative regulation of cellular component movement	2.44251	1
GO:0071805	0.896428	0.663207	10.3017	7	170	potassium ion transmembrane transport	4.40104	1
GO:0048522	0.896996	0.9169	346.561	329	5719	positive regulation of cellular process	0.182772	1
GO:0043065	0.897269	0.806587	38.904	32	642	positive regulation of apoptotic process	1.4107	1
GO:0009799	0.897732	0.623064	7.81717	5	129	specification of symmetry	5.45941	1
GO:0048145	0.897732	0.623064	7.81717	5	129	regulation of fibroblast proliferation	5.45941	1
GO:0008593	0.897732	0.623064	7.81717	5	129	regulation of Notch signaling pathway	5.45941	1
GO:0030073	0.897846	0.710066	15.1495	11	250	insulin secretion	3.19792	1
GO:0090068	0.897869	0.734205	18.6642	14	308	positive regulation of cell cycle process	2.68152	1
GO:0055123	0.898114	0.643629	9.08973	6	150	digestive system development	4.84533	1
GO:0035194	0.898114	0.643629	9.08973	6	150	post-transcriptional gene silencing by RNA	4.84533	1
GO:0051168	0.898947	0.687674	12.7862	9	211	nuclear export	3.6731	1
GO:0048144	0.901359	0.618037	7.87776	5	130	fibroblast proliferation	5.37574	1
GO:0016441	0.901496	0.639145	9.15033	6	151	posttranscriptional gene silencing	4.78137	1
GO:1904375	0.901496	0.639145	9.15033	6	151	regulation of protein localization to cell periphery	4.78137	1
GO:0009913	0.902291	0.695023	14.0588	10	232	epidermal cell differentiation	3.37582	1
GO:0044262	0.902334	0.736304	19.9368	15	329	cellular carbohydrate metabolic process	2.51799	1
GO:0022607	0.902949	0.897593	189.915	175	3134	cellular component assembly	0.323739	1
[truncated: 405 more rows]

## Sheet: GOBP_sexDEG_AL_mUP_220705
GOBPID	Pvalue	OddsRatio	ExpCount	Count	Size	Term	enrichment	padj
GO:0044281	1.53e-23	3.14411	57.0727	136	1937	small molecule metabolic process	0.642743	2.12e-20
GO:0006082	1.82e-22	3.70685	32.6761	96	1109	organic acid metabolic process	1.38409	1.26e-19
GO:0043436	6.4e-22	3.7094	31.468	93	1068	oxoacid metabolic process	1.44577	2.95e-19
GO:0019752	1.23e-21	3.7234	30.5841	91	1038	carboxylic acid metabolic process	1.49763	4.25e-19
GO:0044282	1.65e-20	5.1978	13.5537	57	460	small molecule catabolic process	4.77658	4.56e-18
GO:0046395	8.33e-19	6.51018	8.0438	42	273	carboxylic acid catabolic process	9.99267	1.92e-16
GO:0032787	1.12e-18	4.09016	19.918	67	676	monocarboxylic acid metabolic process	2.5998	2.2e-16
GO:0016054	8.2e-18	6.05675	8.54469	42	290	organic acid catabolic process	8.85546	1.42e-15
GO:0009063	9.12e-17	10.1174	3.53574	27	120	cellular amino acid catabolic process	33.2475	1.4e-14
GO:0044283	1.47e-15	3.59213	21.1849	64	719	small molecule biosynthetic process	2.19523	2.03e-13
GO:1901606	5.67e-14	10.1137	2.85805	22	97	alpha-amino acid catabolic process	41.4607	7.12e-12
GO:1901605	9.76e-12	5.55769	5.98129	28	203	alpha-amino acid metabolic process	12.0482	1.12e-09
GO:0017144	3.07e-11	14.8475	1.35537	14	46	drug metabolic process	117.319	3.27e-09
GO:0046364	1.65e-10	7.13886	3.41788	20	116	monosaccharide biosynthetic process	26.3555	1.63e-08
GO:0019319	2e-10	7.55789	3.09377	19	105	hexose biosynthetic process	30.5585	1.85e-08
GO:0043648	4.2e-10	6.71615	3.59466	20	122	dicarboxylic acid metabolic process	23.8269	3.54e-08
GO:0006575	4.35e-10	5.40504	5.21521	24	177	cellular modified amino acid metabolic process	13.5838	3.54e-08
GO:0006094	9.24e-10	7.31439	3.00538	18	102	gluconeogenesis	30.6782	7.1e-08
GO:1901615	1.98e-09	3.01115	16.8831	45	573	organic hydroxy compound metabolic process	2.43031	1.44e-07
GO:0046394	2.86e-09	3.85956	9.13398	31	310	carboxylic acid biosynthetic process	5.72	1.98e-07
GO:0016053	4.9e-09	3.76326	9.34023	31	317	organic acid biosynthetic process	5.47017	3.23e-07
GO:0019369	5.79e-09	11.9208	1.35537	12	46	arachidonic acid metabolic process	100.56	3.64e-07
GO:0044255	2.41e-08	2.29967	31.8216	65	1080	cellular lipid metabolic process	0.988152	1.45e-06
GO:0019637	3.42e-08	2.27556	32.1163	65	1090	organophosphate metabolic process	0.970104	1.89e-06
GO:0120254	3.42e-08	6.4713	2.94645	16	100	olefinic compound metabolic process	28.3712	1.89e-06
GO:0006631	4.02e-08	3.2557	11.3438	33	385	fatty acid metabolic process	3.94776	2.14e-06
GO:0009074	4.51e-08	16.7897	0.795541	9	27	aromatic amino acid family catabolic process	218.914	2.31e-06
GO:0003008	7.66e-08	1.99408	50.1191	88	1701	system process	0.539302	3.78e-06
GO:0006520	8.4e-08	3.35725	9.98845	30	339	cellular amino acid metabolic process	4.62892	3.81e-06
GO:0006629	8.54e-08	2.06859	42.5467	78	1444	lipid metabolic process	0.663312	3.81e-06
GO:0016051	8.62e-08	3.8534	7.30719	25	248	carbohydrate biosynthetic process	7.20766	3.81e-06
GO:0006558	9.65e-08	29.2674	0.441967	7	15	L-phenylalanine metabolic process	551.662	3.81e-06
GO:0006559	9.65e-08	29.2674	0.441967	7	15	L-phenylalanine catabolic process	551.662	3.81e-06
GO:1902221	9.65e-08	29.2674	0.441967	7	15	erythrose 4-phosphate/phosphoenolpyruvate family amino acid metabolic process	551.662	3.81e-06
GO:1902222	9.65e-08	29.2674	0.441967	7	15	erythrose 4-phosphate/phosphoenolpyruvate family amino acid catabolic process	551.662	3.81e-06
GO:0055086	1.39e-07	2.56923	19.4465	45	660	nucleobase-containing small molecule metabolic process	1.83182	5.32e-06
GO:0009072	1.71e-07	11.2097	1.17858	10	40	aromatic amino acid family metabolic process	110.825	6.39e-06
GO:0006081	1.83e-07	7.32193	2.15091	13	73	cellular aldehyde metabolic process	43.2569	6.65e-06
GO:0007586	3.24e-07	5.37577	3.44734	16	117	digestion	20.7255	1.14e-05
GO:0001676	3.29e-07	5.77599	3.03484	15	103	long-chain fatty acid metabolic process	25.0712	1.14e-05
GO:0072521	3.94e-07	2.77305	14.3492	36	487	purine-containing compound metabolic process	2.69155	1.33e-05
GO:0005975	4.35e-07	2.51091	18.9162	43	642	carbohydrate metabolic process	1.84993	1.41e-05
GO:0009117	4.47e-07	2.60252	16.9715	40	576	nucleotide metabolic process	2.13783	1.41e-05
GO:0006006	4.48e-07	3.73205	6.89468	23	234	glucose metabolic process	7.44824	1.41e-05
GO:0006753	5.58e-07	2.57755	17.1189	40	581	nucleoside phosphate metabolic process	2.10119	1.72e-05
GO:0006066	5.75e-07	2.91949	12.1099	32	411	alcohol metabolic process	3.35911	1.73e-05
GO:0019693	8.4e-07	2.76403	13.5537	34	460	ribose phosphate metabolic process	2.84919	2.47e-05
GO:0006091	9.53e-07	2.58516	16.176	38	549	generation of precursor metabolites and energy	2.23561	2.75e-05
GO:0022600	9.87e-07	6.18287	2.47501	13	84	digestive system process	32.6695	2.79e-05
GO:0042558	1.18e-06	10.4133	1.11965	9	38	pteridine-containing compound metabolic process	110.518	3.26e-05
GO:0019318	1.66e-06	3.32632	7.98487	24	271	hexose metabolic process	5.79469	4.51e-05
GO:0072329	1.72e-06	4.40492	4.36074	17	148	monocarboxylic acid catabolic process	13.7621	4.56e-05
GO:0005996	2.26e-06	3.17224	8.69202	25	295	monosaccharide metabolic process	5.09394	5.89e-05
GO:0019674	2.34e-06	6.98471	1.88573	11	64	NAD metabolic process	47.6201	5.98e-05
GO:0046942	2.88e-06	3.12505	8.80987	25	299	carboxylic acid transport	4.95856	7.23e-05
GO:0015711	2.93e-06	2.84177	11.1965	29	380	organic anion transport	3.56114	7.23e-05
GO:0006163	3.11e-06	2.63165	13.7304	33	466	purine nucleotide metabolic process	2.69463	7.55e-05
GO:0033559	3.22e-06	5.4839	2.7402	13	93	unsaturated fatty acid metabolic process	26.6523	7.68e-05
GO:0009259	3.85e-06	2.64636	13.2295	32	449	ribonucleotide metabolic process	2.81459	9.03e-05
GO:0019373	3.94e-06	20.0205	0.471431	6	16	epoxygenase P450 pathway	415.594	9.08e-05
GO:1901135	4.14e-06	1.99152	33.7073	61	1144	carbohydrate derivative metabolic process	0.826486	9.38e-05
GO:0006090	4.23e-06	3.89378	5.15628	18	175	pyruvate metabolic process	10.4221	9.38e-05
GO:0015849	4.27e-06	2.90372	10.1947	27	346	organic acid transport	3.99916	9.38e-05
GO:0050892	4.38e-06	8.62463	1.29644	9	44	intestinal absorption	82.4318	9.46e-05
GO:0006690	4.62e-06	5.2846	2.82859	13	96	icosanoid metabolic process	25.0126	9.83e-05
GO:0016052	4.74e-06	3.54584	6.24647	20	212	carbohydrate catabolic process	7.89071	9.94e-05
GO:0009150	4.99e-06	2.65569	12.7581	31	433	purine ribonucleotide metabolic process	2.93186	0.000102991
GO:1901575	5.7e-06	1.70108	68.7406	104	2333	organic substance catabolic process	0.338814	0.000115831
GO:0019400	9.79e-06	11.6974	0.795541	7	27	alditol metabolic process	170.266	0.000196286
GO:0034220	1.23e-05	1.89453	36.4475	63	1237	ion transmembrane transport	0.730061	0.000242426
GO:0044275	1.32e-05	7.35946	1.47322	9	50	cellular carbohydrate catabolic process	63.8352	0.000257549
GO:0072330	1.7e-05	3.34298	6.24647	19	212	monocarboxylic acid biosynthetic process	7.49617	0.000327203
GO:0006760	2.08e-05	10.1695	0.883934	7	30	folic acid-containing compound metabolic process	137.916	0.000393991
GO:0042445	2.34e-05	3.39085	5.83396	18	198	hormone metabolic process	8.14141	0.000436622
GO:0006536	2.61e-05	7.87426	1.23751	8	42	glutamate metabolic process	80.4172	0.000481187
GO:0006734	3.42e-05	6.41731	1.65001	9	56	NADH metabolic process	50.889	0.00062221
GO:0046487	3.49e-05	18.4966	0.412502	5	14	glyoxylate metabolic process	452.347	0.000626507
GO:1905039	4e-05	3.72506	4.44913	15	151	carboxylic acid transmembrane transport	11.6653	0.000700278
GO:1903825	4e-05	3.72506	4.44913	15	151	organic acid transmembrane transport	11.6653	0.000700278
GO:0006071	4.17e-05	11.7712	0.677683	6	23	glycerol metabolic process	201.119	0.000720623
GO:0009056	4.9e-05	1.56768	82.7362	116	2808	catabolic process	0.260868	0.000837166
GO:0055085	5.22e-05	1.74323	43.8431	70	1488	transmembrane transport	0.560596	0.000880255
GO:0090407	5.59e-05	2.12136	19.3287	38	656	organophosphate biosynthetic process	1.56579	0.000931544
GO:0008610	5.89e-05	2.03556	22.2751	42	756	lipid biosynthetic process	1.30306	0.00096912
GO:0034308	7.28e-05	4.61879	2.68127	11	91	primary alcohol metabolic process	23.5542	0.00118458
GO:0042737	8.82e-05	10.0034	0.766076	6	26	drug catabolic process	157.385	0.00141834
GO:0042493	9.52e-05	2.31238	13.4947	29	458	response to drug	2.45146	0.00151346
GO:0042559	0.0001002	13.8696	0.500896	5	17	pteridine-containing compound biosynthetic process	306.782	0.00157473
GO:0042180	0.00010688	2.79175	7.74915	20	263	cellular ketone metabolic process	5.12715	0.00166084
GO:0019751	0.000122095	3.5209	4.36074	14	148	polyol metabolic process	11.3335	0.0018762
GO:0008652	0.00012897	4.72318	2.38662	10	81	cellular amino acid biosynthetic process	27.0264	0.00196007
GO:0072337	0.000137291	9.09278	0.825005	6	28	modified amino acid transport	135.704	0.00204166
GO:0009065	0.000137291	9.09278	0.825005	6	28	glutamine family amino acid catabolic process	135.704	0.00204166
GO:0006639	0.000190776	3.55622	4.00717	13	136	acylglycerol metabolic process	12.463	0.00280685
GO:0072524	0.000219008	5.57225	1.65001	8	56	pyridine-containing compound metabolic process	45.2347	0.00318829
GO:0009062	0.000236975	3.69929	3.5652	12	121	fatty acid catabolic process	14.5334	0.00337977
GO:0006638	0.000237048	3.47083	4.09556	13	139	neutral lipid metabolic process	11.9309	0.00337977
GO:0034311	0.00024897	8	0.913398	6	31	diol metabolic process	110.71	0.00351353
GO:0042762	0.000298914	10.3993	0.618754	5	21	regulation of sulfur metabolic process	201.043	0.00417574
GO:0098656	0.000320365	2.10816	15.2037	30	516	anion transmembrane transport	1.99793	0.00443065
GO:1903035	0.000339263	3.80486	3.18216	11	108	negative regulation of response to wounding	16.7226	0.00464555
GO:0009165	0.000373596	2.51736	8.51523	20	289	nucleotide biosynthetic process	4.24612	0.00494379
GO:0046653	0.000377539	9.78695	0.648218	5	22	tetrahydrofolate metabolic process	183.182	0.00494379
GO:0046655	0.000377539	9.78695	0.648218	5	22	folic acid metabolic process	183.182	0.00494379
GO:0072662	0.000382491	4.49552	2.2393	9	76	protein localization to peroxisome	27.6295	0.00494379
GO:0072663	0.000382491	4.49552	2.2393	9	76	establishment of protein localization to peroxisome	27.6295	0.00494379
GO:0006625	0.000382491	4.49552	2.2393	9	76	protein targeting to peroxisome	27.6295	0.00494379
GO:0050877	0.000394555	1.81896	25.8698	44	878	nervous system process	1.0121	0.00505249
GO:0019320	0.000399356	5.04483	1.79733	8	61	hexose catabolic process	38.1231	0.00506706
GO:1901293	0.000426599	2.48907	8.60362	20	292	nucleoside phosphate biosynthetic process	4.15932	0.00536352
GO:0009064	0.000511277	4.30197	2.32769	9	79	glutamine family amino acid metabolic process	25.5709	0.00631335
GO:0043574	0.000511277	4.30197	2.32769	9	79	peroxisomal transport	25.5709	0.00631335
GO:0010951	0.000543745	2.87051	5.62771	15	191	negative regulation of endopeptidase activity	7.29092	0.00665486
GO:0001523	0.000568539	3.85031	2.85805	10	97	retinoid metabolic process	18.8458	0.00674614
GO:0035249	0.000568539	3.85031	2.85805	10	97	synaptic transmission, glutamatergic	18.8458	0.00674614
GO:0042537	0.00058047	8.75554	0.707147	5	24	benzene-containing compound metabolic process	153.924	0.00674614
GO:0006063	0.00058047	8.75554	0.707147	5	24	uronic acid metabolic process	153.924	0.00674614
GO:0043651	0.00058047	8.75554	0.707147	5	24	linoleic acid metabolic process	153.924	0.00674614
GO:0019585	0.00058047	8.75554	0.707147	5	24	glucuronate metabolic process	153.924	0.00674614
GO:0061041	0.000639526	3.09839	4.53753	13	154	regulation of wound healing	9.71985	0.00737054
GO:1903034	0.000674894	2.80594	5.74557	15	195	regulation of response to wounding	6.99487	0.00755188
GO:0006735	0.000677103	6.44896	1.09019	6	37	NADH regeneration	77.7151	0.00755188
GO:0061718	0.000677103	6.44896	1.09019	6	37	glucose catabolic process to pyruvate	77.7151	0.00755188
GO:0061621	0.000677103	6.44896	1.09019	6	37	canonical glycolysis	77.7151	0.00755188
GO:0046365	0.000685276	4.60835	1.94465	8	66	monosaccharide catabolic process	32.5657	0.00758189
GO:0042738	0.000708197	8.3172	0.736612	5	25	exogenous drug catabolic process	141.856	0.00777331
GO:0010466	0.00074998	2.77473	5.8045	15	197	negative regulation of peptidase activity	6.85356	0.00813223
GO:0071616	0.000758538	4.52993	1.97412	8	67	acyl-CoA biosynthetic process	31.6008	0.00813223
GO:0035384	0.000758538	4.52993	1.97412	8	67	thioester biosynthetic process	31.6008	0.00813223
GO:0022900	0.000812269	2.87087	5.24467	14	178	electron transport chain	7.83512	0.00864129
GO:1901616	0.000837969	4.45413	2.00358	8	68	organic hydroxy compound catabolic process	30.6782	0.00865014
GO:1901607	0.000837969	4.45413	2.00358	8	68	alpha-amino acid biosynthetic process	30.6782	0.00865014
GO:1901657	0.000839046	3.17104	4.09556	12	139	glycosyl compound metabolic process	11.0131	0.00865014
GO:0006112	0.000845347	3.6398	3.00538	10	102	energy reserve metabolic process	17.0434	0.00865014
GO:0009068	0.000855816	7.9206	0.766076	5	26	aspartate family amino acid catabolic process	131.154	0.00865014
GO:0006085	0.000855816	7.9206	0.766076	5	26	acetyl-CoA biosynthetic process	131.154	0.00865014
GO:0009179	0.000863138	2.99124	4.68485	13	159	purine ribonucleoside diphosphate metabolic process	9.11815	0.00865014
GO:0009135	0.000863138	2.99124	4.68485	13	159	purine nucleoside diphosphate metabolic process	9.11815	0.00865014
GO:0046164	0.00087856	5.07676	1.56162	7	53	alcohol catabolic process	44.188	0.00874135
GO:0006835	0.000892739	3.35219	3.5652	11	121	dicarboxylic acid transport	13.3223	0.0087615
GO:0044242	0.000893255	2.53656	7.15986	17	243	cellular lipid catabolic process	5.10498	0.0087615
GO:0006805	0.000953341	3.909	2.53394	9	86	xenobiotic metabolic process	21.5776	0.00928501
GO:0009185	0.000969325	2.95041	4.74378	13	161	ribonucleoside diphosphate metabolic process	8.89302	0.00937466
GO:0016042	0.000979001	2.26266	9.8706	21	335	lipid catabolic process	3.31808	0.00940249
GO:0006084	0.00103774	5.87873	1.17858	6	40	acetyl-CoA metabolic process	66.495	0.00983008
GO:0061620	0.00103774	5.87873	1.17858	6	40	glycolytic process through glucose-6-phosphate	66.495	0.00983008
GO:0016101	0.00105891	3.52413	3.09377	10	105	diterpenoid metabolic process	16.0834	0.00996241
GO:0044248	0.0010709	1.45867	72.1585	97	2449	cellular catabolic process	0.286782	0.0100071
GO:0015980	0.00108951	2.35025	8.60362	19	292	energy derivation by oxidation of organic compounds	3.95135	0.0101127
GO:0098869	0.0011249	3.80952	2.59287	9	88	cellular oxidant detoxification	20.608	0.0103716
GO:0046390	0.00118184	2.64233	6.06968	15	206	ribose phosphate biosynthetic process	6.26779	0.0108244
GO:0035640	0.0012182	7.23086	0.825005	5	28	exploration behavior	113.087	0.011084
GO:0060078	0.00128906	3.00394	4.30181	12	146	regulation of postsynaptic membrane potential	9.98236	0.0116331
GO:0042391	0.00129754	2.08571	12.1983	24	414	regulation of membrane potential	2.48295	0.0116331
GO:0071466	0.00132061	3.71494	2.6518	9	90	cellular response to xenobiotic stimulus	19.7022	0.0116331
GO:0061045	0.00132061	3.71494	2.6518	9	90	negative regulation of wound healing	19.7022	0.0116331
GO:0007031	0.00132061	3.71494	2.6518	9	90	peroxisome organization	19.7022	0.0116331
GO:0009167	0.00134967	5.55137	1.23751	6	42	purine ribonucleoside monophosphate metabolic process	60.3129	0.0117396
GO:0061615	0.00134967	5.55137	1.23751	6	42	glycolytic process through fructose-6-phosphate	60.3129	0.0117396
GO:0009161	0.00136233	4.66934	1.67947	7	57	ribonucleoside monophosphate metabolic process	38.2038	0.0117757
GO:1990748	0.00141038	3.38081	3.21163	10	109	cellular detoxification	14.9247	0.0120405
GO:0006641	0.00141038	3.38081	3.21163	10	109	triglyceride metabolic process	14.9247	0.0120405
GO:0008202	0.00143183	2.23713	9.48756	20	322	steroid metabolic process	3.42039	0.0121166
GO:0015740	0.00143682	6.9291	0.854469	5	29	C4-dicarboxylate transport	105.422	0.0121166
GO:0009066	0.00151079	4.57747	1.70894	7	58	aspartate family amino acid metabolic process	36.8977	0.0125186
GO:0035383	0.00151164	3.34677	3.24109	10	110	thioester metabolic process	14.6545	0.0125186
GO:0006637	0.00151164	3.34677	3.24109	10	110	acyl-CoA metabolic process	14.6545	0.0125186
GO:0006721	0.00161872	3.31341	3.27056	10	111	terpenoid metabolic process	14.3917	0.0133256
GO:1900047	0.00167155	4.48913	1.7384	7	59	negative regulation of hemostasis	35.6576	0.0135985
GO:0030195	0.00167155	4.48913	1.7384	7	59	negative regulation of blood coagulation	35.6576	0.0135985
GO:0098660	0.00169616	1.76083	22.2457	37	755	inorganic ion transmembrane transport	1.15097	0.0137181
GO:0042398	0.0018453	4.40413	1.76787	7	60	cellular modified amino acid biosynthetic process	34.4789	0.0147517
GO:0051289	0.0018453	4.40413	1.76787	7	60	protein homotetramerization	34.4789	0.0147517
GO:0042632	0.00189578	3.87076	2.26876	8	77	cholesterol homeostasis	23.9258	0.0150682
GO:0006007	0.00194569	5.12329	1.3259	6	45	glucose catabolic process	52.5393	0.0153765
GO:0009116	0.00197737	3.21717	3.35895	10	114	nucleoside metabolic process	13.6442	0.0154516
GO:0072522	0.00197753	2.49654	6.39379	15	217	purine-containing compound biosynthetic process	5.64845	0.0154516
GO:0055092	0.00205931	3.8152	2.29823	8	78	sterol homeostasis	23.3162	0.0158888
GO:0009132	0.00206225	2.69283	5.15628	13	175	nucleoside diphosphate metabolic process	7.52705	0.0158888
GO:0016485	0.00206796	2.48407	6.42325	15	218	protein processing	5.59675	0.0158888
GO:0009410	0.00223158	3.41779	2.85805	9	97	response to xenobiotic stimulus	16.9612	0.0167049
GO:0033866	0.00223374	3.76121	2.32769	8	79	nucleoside bisphosphate biosynthetic process	22.7297	0.0167049
GO:0034030	0.00223374	3.76121	2.32769	8	79	ribonucleoside bisphosphate biosynthetic process	22.7297	0.0167049
GO:0034033	0.00223374	3.76121	2.32769	8	79	purine nucleoside bisphosphate biosynthetic process	22.7297	0.0167049
GO:0050819	0.00223457	4.2434	1.8268	7	62	negative regulation of coagulation	32.2903	0.0167049
[truncated: 1,198 more rows]

## Sheet: GOBP_sexDEG_AL_fUP_220705
GOBPID	Pvalue	OddsRatio	ExpCount	Count	Size	Term	enrichment	padj
[truncated: 1,569 more rows]
