# Supplementary material for: An automated feeding system for the African killifish reveals the impact of diet on lifespan and allows scalable assessment of associative learning
Source: eLife. 2022 Nov 10;11:e69008. doi: 10.7554/eLife.69008 (PMC9788828; doi:10.7554/eLife.69008)
Supplement: Figure 5—source data 11. [file elife-69008-fig5-data11.xlsx]

## Sheet: ALsexDEG_f_control
	enrichment	pvalue	Median pvalue
1	0.081448	0.334741	0.215043
2	0.0723982	0.679432
3	0.0995475	0.0527631
4	0.0633484	1
5	0.081448	0.334741
6	0.0678733	0.784883
7	0.0497738	0.411403
8	0.0769231	0.490879
9	0.081448	0.334741
10	0.0859729	0.215043
11	0.0678733	0.784883
12	0.0904977	0.130158
13	0.117647	0.00351862
14	0.0678733	0.784883
15	0.0859729	0.215043
16	0.0723982	0.679432
17	0.0723982	0.679432
18	0.104072	0.0268367
19	0.0995475	0.0527631
20	0.0723982	0.679432
21	0.0950226	0.0744455
22	0.0859729	0.215043
23	0.104072	0.0268367
24	0.081448	0.334741
25	0.0723982	0.679432
26	0.117647	0.00351862
27	0.0995475	0.0527631
28	0.0588235	0.890454
29	0.0950226	0.0744455
30	0.0950226	0.0744455
31	0.104072	0.0268367
32	0.0723982	0.679432
33	0.0769231	0.490879
34	0.122172	0.00146241
35	0.0588235	0.890454
36	0.104072	0.0268367
37	0.0542986	0.584797
38	0.081448	0.334741
39	0.113122	0.00830017
40	0.0950226	0.0744455
41	0.0678733	0.784883
42	0.0904977	0.130158
43	0.0723982	0.679432
44	0.0678733	0.784883
45	0.113122	0.00830017
46	0.117647	0.00351862
47	0.0723982	0.679432
48	0.104072	0.0268367
49	0.0950226	0.0744455
50	0.0904977	0.130158
51	0.0723982	0.679432
52	0.0769231	0.490879
53	0.0542986	0.584797
54	0.0904977	0.130158
55	0.0633484	1
56	0.0769231	0.490879
57	0.081448	0.334741
58	0.081448	0.334741
59	0.104072	0.0268367
60	0.113122	0.00830017
61	0.0678733	0.784883
62	0.0723982	0.679432
63	0.081448	0.334741
64	0.104072	0.0268367
65	0.0769231	0.490879
66	0.0542986	0.584797
67	0.0995475	0.0527631
68	0.0769231	0.490879
69	0.113122	0.00830017
70	0.135747	0.000150511
71	0.081448	0.334741
72	0.0995475	0.0527631
73	0.0497738	0.411403
74	0.0769231	0.490879
75	0.0723982	0.679432
76	0.081448	0.334741
77	0.0769231	0.490879
78	0.0995475	0.0527631
79	0.0497738	0.411403
80	0.0678733	0.784883
81	0.0723982	0.679432
82	0.0950226	0.0744455
83	0.0723982	0.679432
84	0.0542986	0.584797
85	0.0769231	0.490879
86	0.140271	5.00193e-05
87	0.0904977	0.130158
88	0.0859729	0.215043
89	0.0995475	0.0527631
90	0.0904977	0.130158
91	0.117647	0.00351862
92	0.0723982	0.679432
93	0.0633484	1
94	0.081448	0.334741
95	0.081448	0.334741
96	0.0950226	0.0744455
97	0.0950226	0.0744455
98	0.0995475	0.0527631
99	0.081448	0.334741
100	0.104072	0.0268367
101	0.0769231	0.490879
102	0.0723982	0.679432
103	0.0723982	0.679432
104	0.081448	0.334741
105	0.0950226	0.0744455
106	0.0950226	0.0744455
107	0.0633484	1
108	0.081448	0.334741
109	0.0904977	0.130158
110	0.0904977	0.130158
111	0.104072	0.0268367
112	0.0497738	0.411403
113	0.117647	0.00351862
114	0.104072	0.0268367
115	0.0904977	0.130158
116	0.081448	0.334741
117	0.0723982	0.679432
118	0.081448	0.334741
119	0.0633484	1
120	0.104072	0.0268367
121	0.081448	0.334741
122	0.081448	0.334741
123	0.0950226	0.0744455
124	0.0769231	0.490879
125	0.0859729	0.215043
126	0.0769231	0.490879
127	0.0769231	0.490879
128	0.0678733	0.784883
129	0.0859729	0.215043
130	0.0769231	0.490879
131	0.0723982	0.679432
132	0.0995475	0.0527631
133	0.040724	0.168445
134	0.104072	0.0268367
135	0.113122	0.00830017
136	0.0633484	1
137	0.0995475	0.0527631
138	0.0588235	0.890454
139	0.0769231	0.490879
140	0.0769231	0.490879
141	0.0950226	0.0744455
142	0.104072	0.0268367
143	0.0859729	0.215043
144	0.0859729	0.215043
145	0.0950226	0.0744455
146	0.081448	0.334741
147	0.0904977	0.130158
148	0.0497738	0.411403
149	0.0995475	0.0527631
150	0.104072	0.0268367
151	0.0678733	0.784883
152	0.0497738	0.411403
153	0.0723982	0.679432
154	0.0633484	1
155	0.0769231	0.490879
156	0.0769231	0.490879
157	0.0859729	0.215043
158	0.081448	0.334741
159	0.0633484	1
160	0.104072	0.0268367
161	0.0769231	0.490879
162	0.0950226	0.0744455
163	0.081448	0.334741
164	0.0769231	0.490879
165	0.0859729	0.215043
166	0.0995475	0.0527631
167	0.0723982	0.679432
168	0.0950226	0.0744455
169	0.0723982	0.679432
170	0.081448	0.334741
171	0.0995475	0.0527631
172	0.0769231	0.490879
173	0.0904977	0.130158
174	0.0904977	0.130158
175	0.0678733	0.784883
176	0.0723982	0.679432
177	0.0904977	0.130158
178	0.0723982	0.679432
179	0.0723982	0.679432
180	0.0588235	0.890454
181	0.0950226	0.0744455
182	0.081448	0.334741
183	0.0904977	0.130158
184	0.0588235	0.890454
185	0.0995475	0.0527631
186	0.0769231	0.490879
187	0.0859729	0.215043
188	0.108597	0.012977
189	0.0588235	0.890454
190	0.117647	0.00351862
191	0.081448	0.334741
192	0.0904977	0.130158
193	0.0633484	1
194	0.0723982	0.679432
195	0.0769231	0.490879
196	0.108597	0.012977
197	0.117647	0.00351862
198	0.0950226	0.0744455
199	0.0950226	0.0744455
200	0.0723982	0.679432
201	0.104072	0.0268367
202	0.0859729	0.215043
203	0.0904977	0.130158
204	0.0859729	0.215043
205	0.0950226	0.0744455
206	0.113122	0.00830017
207	0.0859729	0.215043
208	0.0859729	0.215043
209	0.0904977	0.130158
210	0.0723982	0.679432
211	0.0769231	0.490879
212	0.0859729	0.215043
213	0.0995475	0.0527631
214	0.0859729	0.215043
215	0.081448	0.334741
216	0.0723982	0.679432
217	0.0950226	0.0744455
218	0.0723982	0.679432
219	0.081448	0.334741
220	0.0995475	0.0527631
221	0.0723982	0.679432
222	0.0723982	0.679432
223	0.0723982	0.679432
224	0.0723982	0.679432
225	0.0859729	0.215043
226	0.0950226	0.0744455
227	0.108597	0.012977
228	0.0950226	0.0744455
229	0.0769231	0.490879
230	0.0769231	0.490879
231	0.0588235	0.890454
232	0.0950226	0.0744455
233	0.0859729	0.215043
234	0.104072	0.0268367
235	0.0678733	0.784883
236	0.0995475	0.0527631
237	0.0723982	0.679432
238	0.0995475	0.0527631
239	0.0588235	0.890454
240	0.040724	0.168445
241	0.0769231	0.490879
242	0.0678733	0.784883
243	0.0723982	0.679432
244	0.0633484	1
245	0.0633484	1
246	0.0859729	0.215043
247	0.0904977	0.130158
248	0.0723982	0.679432
249	0.081448	0.334741
250	0.0904977	0.130158
251	0.0859729	0.215043
252	0.0542986	0.584797
253	0.0723982	0.679432
254	0.0995475	0.0527631
255	0.0995475	0.0527631
256	0.0904977	0.130158
257	0.0950226	0.0744455
258	0.0588235	0.890454
259	0.0769231	0.490879
260	0.0769231	0.490879
261	0.0904977	0.130158
262	0.140271	5.00193e-05
263	0.0723982	0.679432
264	0.0859729	0.215043
265	0.104072	0.0268367
266	0.081448	0.334741
267	0.0995475	0.0527631
268	0.0769231	0.490879
269	0.0678733	0.784883
270	0.081448	0.334741
271	0.0995475	0.0527631
272	0.108597	0.012977
273	0.0769231	0.490879
274	0.0769231	0.490879
275	0.0633484	1
276	0.0859729	0.215043
277	0.0452489	0.27205
278	0.0542986	0.584797
279	0.0904977	0.130158
280	0.0995475	0.0527631
281	0.0633484	1
282	0.0859729	0.215043
283	0.0769231	0.490879
284	0.0995475	0.0527631
285	0.081448	0.334741
286	0.113122	0.00830017
287	0.0769231	0.490879
288	0.0904977	0.130158
289	0.0950226	0.0744455
290	0.0542986	0.584797
291	0.0859729	0.215043
292	0.0542986	0.584797
293	0.0588235	0.890454
294	0.0950226	0.0744455
295	0.0588235	0.890454
296	0.0723982	0.679432
297	0.0950226	0.0744455
298	0.0769231	0.490879
299	0.0678733	0.784883
300	0.0859729	0.215043
301	0.0950226	0.0744455
302	0.104072	0.0268367
303	0.0950226	0.0744455
304	0.0995475	0.0527631
305	0.0723982	0.679432
306	0.0542986	0.584797
307	0.0950226	0.0744455
308	0.113122	0.00830017
309	0.0950226	0.0744455
310	0.0769231	0.490879
311	0.0633484	1
312	0.0950226	0.0744455
313	0.0769231	0.490879
314	0.0859729	0.215043
315	0.0769231	0.490879
316	0.0678733	0.784883
317	0.081448	0.334741
318	0.108597	0.012977
319	0.0678733	0.784883
320	0.0633484	1
321	0.0859729	0.215043
322	0.104072	0.0268367
323	0.108597	0.012977
324	0.0452489	0.27205
325	0.0995475	0.0527631
326	0.0859729	0.215043
327	0.117647	0.00351862
328	0.0859729	0.215043
329	0.0995475	0.0527631
330	0.113122	0.00830017
331	0.131222	0.000295472
332	0.0633484	1
333	0.0859729	0.215043
334	0.117647	0.00351862
335	0.0904977	0.130158
336	0.081448	0.334741
337	0.0859729	0.215043
338	0.081448	0.334741
339	0.104072	0.0268367
340	0.0950226	0.0744455
341	0.0859729	0.215043
342	0.0769231	0.490879
343	0.0678733	0.784883
344	0.081448	0.334741
345	0.0995475	0.0527631
346	0.0904977	0.130158
347	0.081448	0.334741
348	0.0904977	0.130158
349	0.081448	0.334741
350	0.0542986	0.584797
351	0.113122	0.00830017
352	0.081448	0.334741
353	0.0542986	0.584797
354	0.081448	0.334741
355	0.0995475	0.0527631
356	0.122172	0.00146241
357	0.0859729	0.215043
358	0.0723982	0.679432
359	0.0859729	0.215043
360	0.0859729	0.215043
361	0.0950226	0.0744455
362	0.081448	0.334741
363	0.0995475	0.0527631
364	0.0723982	0.679432
365	0.0859729	0.215043
366	0.0633484	1
367	0.0995475	0.0527631
368	0.0769231	0.490879
369	0.081448	0.334741
370	0.0859729	0.215043
371	0.0950226	0.0744455
372	0.0723982	0.679432
373	0.0678733	0.784883
374	0.0452489	0.27205
375	0.0950226	0.0744455
376	0.122172	0.00146241
377	0.081448	0.334741
378	0.108597	0.012977
379	0.081448	0.334741
380	0.0769231	0.490879
381	0.0995475	0.0527631
382	0.0904977	0.130158
383	0.0633484	1
384	0.104072	0.0268367
385	0.081448	0.334741
386	0.0769231	0.490879
387	0.104072	0.0268367
388	0.081448	0.334741
389	0.0678733	0.784883
390	0.0678733	0.784883
391	0.108597	0.012977
392	0.0904977	0.130158
393	0.104072	0.0268367
394	0.0859729	0.215043
395	0.081448	0.334741
396	0.0859729	0.215043
397	0.0950226	0.0744455
398	0.117647	0.00351862
399	0.117647	0.00351862
400	0.0633484	1
401	0.0950226	0.0744455
402	0.126697	0.00080084
403	0.0678733	0.784883
404	0.081448	0.334741
405	0.081448	0.334741
406	0.0452489	0.27205
407	0.0904977	0.130158
408	0.0588235	0.890454
409	0.0995475	0.0527631
410	0.108597	0.012977
411	0.0904977	0.130158
412	0.0995475	0.0527631
413	0.0542986	0.584797
414	0.0769231	0.490879
415	0.108597	0.012977
416	0.0542986	0.584797
417	0.126697	0.00080084
418	0.081448	0.334741
419	0.0497738	0.411403
420	0.0995475	0.0527631
421	0.0769231	0.490879
422	0.0995475	0.0527631
423	0.081448	0.334741
424	0.0950226	0.0744455
425	0.0859729	0.215043
426	0.0995475	0.0527631
427	0.0950226	0.0744455
428	0.0904977	0.130158
429	0.081448	0.334741
430	0.0904977	0.130158
431	0.0769231	0.490879
432	0.0723982	0.679432
433	0.0769231	0.490879
434	0.0678733	0.784883
435	0.0995475	0.0527631
436	0.0678733	0.784883
437	0.0904977	0.130158
438	0.0542986	0.584797
439	0.0678733	0.784883
440	0.108597	0.012977
441	0.0950226	0.0744455
442	0.0723982	0.679432
443	0.0904977	0.130158
444	0.081448	0.334741
445	0.0678733	0.784883
446	0.0723982	0.679432
447	0.104072	0.0268367
448	0.104072	0.0268367
449	0.108597	0.012977
450	0.0950226	0.0744455
451	0.0769231	0.490879
452	0.081448	0.334741
453	0.0769231	0.490879
454	0.135747	0.000150511
455	0.122172	0.00146241
456	0.0859729	0.215043
457	0.0904977	0.130158
458	0.0859729	0.215043
459	0.0859729	0.215043
460	0.0904977	0.130158
461	0.104072	0.0268367
462	0.0950226	0.0744455
463	0.0950226	0.0744455
464	0.081448	0.334741
465	0.0769231	0.490879
466	0.0859729	0.215043
467	0.0542986	0.584797
468	0.0633484	1
469	0.0588235	0.890454
470	0.081448	0.334741
471	0.0633484	1
472	0.0950226	0.0744455
473	0.0904977	0.130158
474	0.0950226	0.0744455
475	0.0769231	0.490879
476	0.0452489	0.27205
477	0.0859729	0.215043
478	0.081448	0.334741
479	0.0904977	0.130158
480	0.0769231	0.490879
481	0.104072	0.0268367
482	0.0995475	0.0527631
483	0.108597	0.012977
484	0.0859729	0.215043
485	0.0633484	1
486	0.0769231	0.490879
487	0.0633484	1
488	0.0588235	0.890454
489	0.0723982	0.679432
490	0.0904977	0.130158
491	0.0950226	0.0744455
492	0.0859729	0.215043
493	0.117647	0.00351862
494	0.117647	0.00351862
495	0.0769231	0.490879
496	0.0723982	0.679432
497	0.0995475	0.0527631
498	0.0633484	1
499	0.0678733	0.784883
500	0.0678733	0.784883
501	0.108597	0.012977
502	0.0950226	0.0744455
503	0.0588235	0.890454
504	0.081448	0.334741
505	0.0904977	0.130158
506	0.104072	0.0268367
507	0.0769231	0.490879
508	0.0859729	0.215043
509	0.0723982	0.679432
510	0.0995475	0.0527631
511	0.0542986	0.584797
512	0.0769231	0.490879
513	0.0859729	0.215043
514	0.0950226	0.0744455
515	0.0950226	0.0744455
516	0.0633484	1
517	0.0769231	0.490879
518	0.0588235	0.890454
519	0.0769231	0.490879
520	0.104072	0.0268367
521	0.0769231	0.490879
522	0.081448	0.334741
523	0.0859729	0.215043
524	0.0859729	0.215043
525	0.0950226	0.0744455
526	0.113122	0.00830017
527	0.0723982	0.679432
528	0.0723982	0.679432
529	0.0769231	0.490879
530	0.0859729	0.215043
531	0.0995475	0.0527631
532	0.0859729	0.215043
533	0.0497738	0.411403
534	0.0904977	0.130158
535	0.0678733	0.784883
536	0.0950226	0.0744455
537	0.0904977	0.130158
538	0.0723982	0.679432
539	0.0859729	0.215043
540	0.0904977	0.130158
541	0.0904977	0.130158
542	0.0678733	0.784883
543	0.0678733	0.784883
544	0.0904977	0.130158
545	0.0859729	0.215043
546	0.0769231	0.490879
547	0.0950226	0.0744455
548	0.0859729	0.215043
549	0.0497738	0.411403
550	0.081448	0.334741
551	0.0904977	0.130158
552	0.0542986	0.584797
553	0.0904977	0.130158
554	0.0859729	0.215043
555	0.0723982	0.679432
556	0.0769231	0.490879
557	0.0723982	0.679432
558	0.0995475	0.0527631
559	0.081448	0.334741
560	0.126697	0.00080084
561	0.0769231	0.490879
562	0.0950226	0.0744455
563	0.0859729	0.215043
564	0.0995475	0.0527631
565	0.0678733	0.784883
566	0.104072	0.0268367
567	0.0542986	0.584797
568	0.081448	0.334741
569	0.0723982	0.679432
570	0.117647	0.00351862
571	0.0723982	0.679432
572	0.081448	0.334741
573	0.0678733	0.784883
574	0.0859729	0.215043
575	0.0588235	0.890454
576	0.0859729	0.215043
577	0.0859729	0.215043
578	0.081448	0.334741
579	0.0904977	0.130158
580	0.0995475	0.0527631
581	0.081448	0.334741
582	0.0859729	0.215043
583	0.0859729	0.215043
584	0.0769231	0.490879
585	0.0950226	0.0744455
586	0.0904977	0.130158
587	0.0588235	0.890454
588	0.0769231	0.490879
589	0.0859729	0.215043
590	0.0769231	0.490879
591	0.0859729	0.215043
592	0.0859729	0.215043
593	0.0769231	0.490879
594	0.0859729	0.215043
595	0.0678733	0.784883
596	0.081448	0.334741
597	0.0452489	0.27205
598	0.0633484	1
599	0.122172	0.00146241
600	0.0769231	0.490879
601	0.104072	0.0268367
602	0.0859729	0.215043
603	0.0678733	0.784883
604	0.108597	0.012977
605	0.0859729	0.215043
606	0.0995475	0.0527631
607	0.0995475	0.0527631
608	0.0678733	0.784883
609	0.0904977	0.130158
610	0.104072	0.0268367
611	0.081448	0.334741
612	0.0859729	0.215043
613	0.0950226	0.0744455
614	0.0588235	0.890454
615	0.135747	0.000150511
616	0.0769231	0.490879
617	0.0950226	0.0744455
618	0.0633484	1
619	0.0542986	0.584797
620	0.113122	0.00830017
621	0.081448	0.334741
622	0.0769231	0.490879
623	0.081448	0.334741
624	0.0633484	1
625	0.0542986	0.584797
626	0.0859729	0.215043
627	0.0859729	0.215043
628	0.0995475	0.0527631
629	0.117647	0.00351862
630	0.0542986	0.584797
631	0.0723982	0.679432
632	0.081448	0.334741
633	0.081448	0.334741
634	0.135747	0.000150511
635	0.0769231	0.490879
636	0.104072	0.0268367
637	0.0588235	0.890454
638	0.126697	0.00080084
639	0.0995475	0.0527631
640	0.0950226	0.0744455
641	0.081448	0.334741
642	0.0678733	0.784883
643	0.0769231	0.490879
644	0.0723982	0.679432
645	0.104072	0.0268367
646	0.0769231	0.490879
647	0.0723982	0.679432
648	0.108597	0.012977
649	0.0678733	0.784883
650	0.0950226	0.0744455
651	0.0995475	0.0527631
652	0.0904977	0.130158
653	0.0769231	0.490879
654	0.0859729	0.215043
655	0.104072	0.0268367
656	0.0859729	0.215043
657	0.0723982	0.679432
658	0.113122	0.00830017
659	0.0542986	0.584797
660	0.0995475	0.0527631
661	0.0769231	0.490879
662	0.0859729	0.215043
663	0.0588235	0.890454
664	0.0995475	0.0527631
665	0.0904977	0.130158
666	0.0723982	0.679432
667	0.0633484	1
668	0.0904977	0.130158
669	0.0859729	0.215043
670	0.081448	0.334741
671	0.0633484	1
672	0.104072	0.0268367
673	0.108597	0.012977
674	0.081448	0.334741
675	0.0769231	0.490879
676	0.081448	0.334741
677	0.0769231	0.490879
678	0.0723982	0.679432
679	0.104072	0.0268367
680	0.135747	0.000150511
681	0.0769231	0.490879
682	0.0588235	0.890454
683	0.122172	0.00146241
684	0.0995475	0.0527631
685	0.0950226	0.0744455
686	0.0588235	0.890454
687	0.0950226	0.0744455
688	0.108597	0.012977
689	0.0723982	0.679432
690	0.0859729	0.215043
691	0.0678733	0.784883
692	0.126697	0.00080084
693	0.113122	0.00830017
694	0.0995475	0.0527631
695	0.0950226	0.0744455
696	0.0859729	0.215043
697	0.113122	0.00830017
698	0.108597	0.012977
699	0.0723982	0.679432
700	0.0904977	0.130158
701	0.0995475	0.0527631
702	0.0723982	0.679432
703	0.0950226	0.0744455
704	0.0859729	0.215043
705	0.0859729	0.215043
706	0.0950226	0.0744455
707	0.0904977	0.130158
708	0.0859729	0.215043
709	0.0588235	0.890454
710	0.0678733	0.784883
711	0.0904977	0.130158
712	0.0723982	0.679432
713	0.104072	0.0268367
714	0.0859729	0.215043
715	0.0904977	0.130158
716	0.081448	0.334741
717	0.0859729	0.215043
718	0.0859729	0.215043
719	0.0633484	1
720	0.0904977	0.130158
721	0.108597	0.012977
722	0.0950226	0.0744455
723	0.0769231	0.490879
724	0.117647	0.00351862
725	0.0588235	0.890454
726	0.108597	0.012977
727	0.0769231	0.490879
728	0.104072	0.0268367
729	0.081448	0.334741
730	0.0678733	0.784883
731	0.108597	0.012977
732	0.0678733	0.784883
733	0.0995475	0.0527631
734	0.113122	0.00830017
735	0.140271	5.00193e-05
736	0.0678733	0.784883
737	0.081448	0.334741
738	0.0904977	0.130158
739	0.081448	0.334741
740	0.0995475	0.0527631
741	0.0769231	0.490879
742	0.131222	0.000295472
743	0.0904977	0.130158
744	0.0859729	0.215043
745	0.0995475	0.0527631
746	0.081448	0.334741
747	0.0678733	0.784883
748	0.081448	0.334741
749	0.131222	0.000295472
750	0.0497738	0.411403
751	0.0859729	0.215043
752	0.104072	0.0268367
753	0.081448	0.334741
754	0.0950226	0.0744455
755	0.0904977	0.130158
756	0.0769231	0.490879
757	0.0723982	0.679432
758	0.0904977	0.130158
759	0.0904977	0.130158
760	0.117647	0.00351862
761	0.0769231	0.490879
762	0.0678733	0.784883
763	0.108597	0.012977
764	0.0633484	1
765	0.0859729	0.215043
766	0.0950226	0.0744455
767	0.0859729	0.215043
768	0.0950226	0.0744455
769	0.0769231	0.490879
770	0.0950226	0.0744455
771	0.104072	0.0268367
772	0.149321	7.21344e-06
773	0.0678733	0.784883
774	0.0859729	0.215043
775	0.140271	5.00193e-05
776	0.0859729	0.215043
777	0.0723982	0.679432
778	0.122172	0.00146241
779	0.113122	0.00830017
780	0.0769231	0.490879
781	0.0904977	0.130158
782	0.0723982	0.679432
783	0.104072	0.0268367
784	0.0678733	0.784883
785	0.0452489	0.27205
786	0.0904977	0.130158
787	0.0904977	0.130158
788	0.0995475	0.0527631
789	0.0950226	0.0744455
790	0.0904977	0.130158
791	0.0904977	0.130158
792	0.0769231	0.490879
793	0.081448	0.334741
794	0.0904977	0.130158
795	0.081448	0.334741
796	0.104072	0.0268367
797	0.0723982	0.679432
798	0.0995475	0.0527631
799	0.0950226	0.0744455
800	0.0633484	1
801	0.0995475	0.0527631
802	0.117647	0.00351862
803	0.0995475	0.0527631
804	0.0678733	0.784883
805	0.126697	0.00080084
806	0.0859729	0.215043
807	0.0723982	0.679432
808	0.0588235	0.890454
809	0.0769231	0.490879
810	0.0950226	0.0744455
811	0.0633484	1
812	0.0950226	0.0744455
813	0.0678733	0.784883
814	0.0904977	0.130158
815	0.0859729	0.215043
816	0.104072	0.0268367
817	0.0769231	0.490879
818	0.113122	0.00830017
819	0.0995475	0.0527631
820	0.0859729	0.215043
821	0.081448	0.334741
822	0.0633484	1
823	0.081448	0.334741
824	0.0723982	0.679432
825	0.0723982	0.679432
826	0.081448	0.334741
827	0.0859729	0.215043
828	0.104072	0.0268367
829	0.0995475	0.0527631
830	0.0995475	0.0527631
831	0.0859729	0.215043
832	0.0950226	0.0744455
833	0.0769231	0.490879
834	0.122172	0.00146241
835	0.0950226	0.0744455
836	0.081448	0.334741
837	0.0859729	0.215043
838	0.0950226	0.0744455
839	0.081448	0.334741
840	0.108597	0.012977
841	0.0859729	0.215043
842	0.0950226	0.0744455
843	0.113122	0.00830017
844	0.0859729	0.215043
845	0.0633484	1
846	0.0769231	0.490879
847	0.0633484	1
848	0.0588235	0.890454
849	0.0950226	0.0744455
850	0.0678733	0.784883
851	0.0904977	0.130158
852	0.081448	0.334741
853	0.081448	0.334741
854	0.0995475	0.0527631
855	0.0904977	0.130158
856	0.081448	0.334741
857	0.0859729	0.215043
858	0.144796	2.2954e-05
859	0.0723982	0.679432
860	0.0678733	0.784883
861	0.0723982	0.679432
862	0.0542986	0.584797
863	0.108597	0.012977
864	0.0769231	0.490879
865	0.0678733	0.784883
866	0.081448	0.334741
867	0.0950226	0.0744455
868	0.0859729	0.215043
869	0.0950226	0.0744455
870	0.0904977	0.130158
871	0.0995475	0.0527631
872	0.104072	0.0268367
873	0.0950226	0.0744455
874	0.0633484	1
875	0.0723982	0.679432
876	0.0950226	0.0744455
877	0.0995475	0.0527631
878	0.0769231	0.490879
879	0.0904977	0.130158
880	0.0950226	0.0744455
881	0.081448	0.334741
882	0.0904977	0.130158
883	0.0633484	1
884	0.104072	0.0268367
885	0.0904977	0.130158
886	0.113122	0.00830017
887	0.108597	0.012977
888	0.0904977	0.130158
889	0.0542986	0.584797
890	0.0769231	0.490879
891	0.0769231	0.490879
892	0.0904977	0.130158
893	0.0588235	0.890454
894	0.0859729	0.215043
895	0.0859729	0.215043
896	0.0859729	0.215043
897	0.117647	0.00351862
898	0.0723982	0.679432
899	0.0588235	0.890454
900	0.0859729	0.215043
901	0.081448	0.334741
902	0.0769231	0.490879
903	0.0859729	0.215043
904	0.0769231	0.490879
905	0.0995475	0.0527631
906	0.126697	0.00080084
907	0.0859729	0.215043
908	0.0904977	0.130158
909	0.0950226	0.0744455
910	0.0633484	1
911	0.0769231	0.490879
912	0.081448	0.334741
913	0.117647	0.00351862
914	0.0633484	1
915	0.113122	0.00830017
916	0.0633484	1
917	0.104072	0.0268367
918	0.081448	0.334741
919	0.0769231	0.490879
920	0.0633484	1
921	0.0633484	1
922	0.0723982	0.679432
923	0.0633484	1
924	0.081448	0.334741
925	0.0904977	0.130158
926	0.0723982	0.679432
927	0.0723982	0.679432
928	0.122172	0.00146241
929	0.0769231	0.490879
930	0.0904977	0.130158
931	0.0904977	0.130158
932	0.117647	0.00351862
933	0.081448	0.334741
934	0.0633484	1
935	0.0995475	0.0527631
936	0.081448	0.334741
937	0.0859729	0.215043
938	0.0769231	0.490879
939	0.108597	0.012977
940	0.0723982	0.679432
941	0.0950226	0.0744455
942	0.0904977	0.130158
943	0.0678733	0.784883
944	0.0859729	0.215043
945	0.081448	0.334741
946	0.126697	0.00080084
947	0.104072	0.0268367
948	0.0633484	1
949	0.0542986	0.584797
950	0.081448	0.334741
951	0.0859729	0.215043
952	0.108597	0.012977
953	0.0950226	0.0744455
954	0.122172	0.00146241
955	0.0769231	0.490879
956	0.0995475	0.0527631
957	0.0633484	1
958	0.0769231	0.490879
959	0.081448	0.334741
960	0.081448	0.334741
961	0.0497738	0.411403
962	0.0633484	1
963	0.0633484	1
964	0.117647	0.00351862
965	0.0723982	0.679432
966	0.0588235	0.890454
967	0.117647	0.00351862
968	0.0769231	0.490879
969	0.0769231	0.490879
970	0.0633484	1
971	0.081448	0.334741
972	0.108597	0.012977
973	0.0497738	0.411403
974	0.0769231	0.490879
975	0.0904977	0.130158
976	0.0769231	0.490879
977	0.0950226	0.0744455
978	0.0497738	0.411403
979	0.081448	0.334741
980	0.0588235	0.890454
981	0.0678733	0.784883
982	0.0904977	0.130158
983	0.0950226	0.0744455
984	0.081448	0.334741
985	0.104072	0.0268367
986	0.0859729	0.215043
987	0.0769231	0.490879
988	0.113122	0.00830017
989	0.0859729	0.215043
990	0.081448	0.334741
991	0.0588235	0.890454
992	0.081448	0.334741
993	0.0678733	0.784883
994	0.0769231	0.490879
995	0.0950226	0.0744455
996	0.0859729	0.215043
997	0.0678733	0.784883
998	0.0588235	0.890454
999	0.0904977	0.130158
1000	0.0588235	0.890454

## Sheet: ALsexDEG_m_control
	enrichment	pvalue	Median pvalue
1	0.0428571	0.800178	0.445335
2	0.0142857	0.129575
3	0.128571	0.0378201
4	0.0714286	0.616343
5	0.0857143	0.32052
6	0.128571	0.0378201
7	0.114286	0.0739543
8	0.0428571	0.800178
9	0.1	0.200566
10	0.0714286	0.616343
11	0.0571429	1
12	0.0857143	0.32052
13	0.0857143	0.32052
14	0.142857	0.00953429
15	0.0714286	0.616343
16	0.1	0.200566
17	0.1	0.200566
18	0.0714286	0.616343
19	0.0571429	1
20	0.0142857	0.129575
21	0.0857143	0.32052
22	0.157143	0.00320391
23	0.0571429	1
24	0.114286	0.0739543
25	0.1	0.200566
26	0.0857143	0.32052
27	0.0714286	0.616343
28	0.0285714	0.445335
29	0.1	0.200566
30	0.0142857	0.129575
31	0.0857143	0.32052
32	0.0857143	0.32052
33	0.1	0.200566
34	0.0571429	1
35	0.0142857	0.129575
36	0.0285714	0.445335
37	0.157143	0.00320391
38	0.0857143	0.32052
39	0.0428571	0.800178
40	0.0428571	0.800178
41	0.0714286	0.616343
42	0.0714286	0.616343
43	0.0571429	1
44	0.0285714	0.445335
45	0.0714286	0.616343
46	0.128571	0.0378201
47	0.0571429	1
48	0.0857143	0.32052
49	0.0857143	0.32052
50	0.0285714	0.445335
51	0.0857143	0.32052
52	0.0857143	0.32052
53	0.0857143	0.32052
54	0	0.0217339
55	0.0857143	0.32052
56	0.0857143	0.32052
57	0.114286	0.0739543
58	0.0571429	1
59	0.0714286	0.616343
60	0.0857143	0.32052
61	0.0571429	1
62	0.0428571	0.800178
63	0.0571429	1
64	0.1	0.200566
65	0.0714286	0.616343
66	0.0285714	0.445335
67	0.0571429	1
68	0.0571429	1
69	0.0714286	0.616343
70	0.0428571	0.800178
71	0.0857143	0.32052
72	0.0857143	0.32052
73	0.0714286	0.616343
74	0.1	0.200566
75	0.0428571	0.800178
76	0.128571	0.0378201
77	0.0857143	0.32052
78	0.0857143	0.32052
79	0.0571429	1
80	0.0571429	1
81	0.0857143	0.32052
82	0.0857143	0.32052
83	0.0857143	0.32052
84	0.0571429	1
85	0.1	0.200566
86	0.0428571	0.800178
87	0.0571429	1
88	0.0571429	1
89	0.0571429	1
90	0.0857143	0.32052
91	0.0285714	0.445335
92	0.1	0.200566
93	0.114286	0.0739543
94	0.0714286	0.616343
95	0.0714286	0.616343
96	0.0428571	0.800178
97	0.0142857	0.129575
98	0.0571429	1
99	0.0571429	1
100	0.1	0.200566
101	0.114286	0.0739543
102	0.0428571	0.800178
103	0.1	0.200566
104	0.0714286	0.616343
105	0.0428571	0.800178
106	0.2	6.9288e-05
107	0.128571	0.0378201
108	0.128571	0.0378201
109	0.157143	0.00320391
110	0.114286	0.0739543
111	0.0714286	0.616343
112	0.0428571	0.800178
113	0.0571429	1
114	0.0714286	0.616343
115	0.1	0.200566
116	0.0857143	0.32052
117	0.0142857	0.129575
118	0.1	0.200566
119	0.1	0.200566
120	0.0571429	1
121	0.1	0.200566
122	0.0428571	0.800178
123	0.0714286	0.616343
124	0.0857143	0.32052
125	0.128571	0.0378201
126	0.0857143	0.32052
127	0.0857143	0.32052
128	0.1	0.200566
129	0.0285714	0.445335
130	0.114286	0.0739543
131	0.0714286	0.616343
132	0.0857143	0.32052
133	0.1	0.200566
134	0.0857143	0.32052
135	0.0571429	1
136	0.0571429	1
137	0.0857143	0.32052
138	0.0857143	0.32052
139	0.1	0.200566
140	0.128571	0.0378201
141	0.114286	0.0739543
142	0.114286	0.0739543
143	0.0142857	0.129575
144	0.0714286	0.616343
145	0.0857143	0.32052
146	0.128571	0.0378201
147	0.0571429	1
148	0.0857143	0.32052
149	0.1	0.200566
150	0.0857143	0.32052
151	0.128571	0.0378201
152	0.0571429	1
153	0.0428571	0.800178
154	0.0714286	0.616343
155	0.0714286	0.616343
156	0.0857143	0.32052
157	0.0857143	0.32052
158	0.0714286	0.616343
159	0.0714286	0.616343
160	0.0571429	1
161	0.0714286	0.616343
162	0.0714286	0.616343
163	0.0857143	0.32052
164	0.0285714	0.445335
165	0.0285714	0.445335
166	0.0571429	1
167	0.0285714	0.445335
168	0.0571429	1
169	0.0428571	0.800178
170	0.0428571	0.800178
171	0.0571429	1
172	0.0714286	0.616343
173	0.0571429	1
174	0.114286	0.0739543
175	0.0571429	1
176	0.0714286	0.616343
177	0.114286	0.0739543
178	0.0714286	0.616343
179	0.0428571	0.800178
180	0.0571429	1
181	0.0428571	0.800178
182	0.0714286	0.616343
183	0.0571429	1
184	0.0571429	1
185	0.142857	0.00953429
186	0.1	0.200566
187	0.0428571	0.800178
188	0.1	0.200566
189	0.1	0.200566
190	0.0857143	0.32052
191	0.0714286	0.616343
192	0.1	0.200566
193	0.0285714	0.445335
194	0.114286	0.0739543
195	0.0142857	0.129575
196	0.0285714	0.445335
197	0.0714286	0.616343
198	0.1	0.200566
199	0.0571429	1
200	0.0714286	0.616343
201	0.1	0.200566
202	0.114286	0.0739543
203	0.1	0.200566
204	0.1	0.200566
205	0.128571	0.0378201
206	0.0857143	0.32052
207	0.0428571	0.800178
208	0.0857143	0.32052
209	0.1	0.200566
210	0.1	0.200566
211	0.1	0.200566
212	0.1	0.200566
213	0.0857143	0.32052
214	0.0428571	0.800178
215	0.0571429	1
216	0.0857143	0.32052
217	0.0285714	0.445335
218	0.0428571	0.800178
219	0.0285714	0.445335
220	0.0285714	0.445335
221	0.0428571	0.800178
222	0.0285714	0.445335
223	0.0285714	0.445335
224	0.0285714	0.445335
225	0.0571429	1
226	0.0571429	1
227	0.157143	0.00320391
228	0.114286	0.0739543
229	0.0428571	0.800178
230	0.0857143	0.32052
231	0.0142857	0.129575
232	0.0714286	0.616343
233	0.0857143	0.32052
234	0.0714286	0.616343
235	0.142857	0.00953429
236	0.0571429	1
237	0.0857143	0.32052
238	0.114286	0.0739543
239	0.0428571	0.800178
240	0.0142857	0.129575
241	0.0285714	0.445335
242	0.0571429	1
243	0.0857143	0.32052
244	0.1	0.200566
245	0.0285714	0.445335
246	0.0714286	0.616343
247	0.0714286	0.616343
248	0.1	0.200566
249	0.0857143	0.32052
250	0.1	0.200566
251	0.1	0.200566
252	0.0714286	0.616343
253	0.0857143	0.32052
254	0.0714286	0.616343
255	0.128571	0.0378201
256	0.0285714	0.445335
257	0.1	0.200566
258	0.0857143	0.32052
259	0.0857143	0.32052
260	0.0285714	0.445335
261	0.0571429	1
262	0.0714286	0.616343
263	0.142857	0.00953429
264	0.0857143	0.32052
265	0.1	0.200566
266	0.0142857	0.129575
267	0.0428571	0.800178
268	0.0714286	0.616343
269	0.0285714	0.445335
270	0.0571429	1
271	0.1	0.200566
272	0.0857143	0.32052
273	0.0428571	0.800178
274	0.142857	0.00953429
275	0.0714286	0.616343
276	0.128571	0.0378201
277	0.0571429	1
278	0.0714286	0.616343
279	0.0285714	0.445335
280	0.0857143	0.32052
281	0.0571429	1
282	0.0285714	0.445335
283	0.0428571	0.800178
284	0.0285714	0.445335
285	0.1	0.200566
286	0.1	0.200566
287	0.0285714	0.445335
288	0.0857143	0.32052
289	0.0714286	0.616343
290	0.0714286	0.616343
291	0.171429	0.000977237
292	0.1	0.200566
293	0.0714286	0.616343
294	0.0428571	0.800178
295	0.0571429	1
296	0.0571429	1
297	0.0714286	0.616343
298	0.128571	0.0378201
299	0.0428571	0.800178
300	0.0714286	0.616343
301	0.114286	0.0739543
302	0.0714286	0.616343
303	0.0571429	1
304	0.0428571	0.800178
305	0.0857143	0.32052
306	0.0857143	0.32052
307	0.114286	0.0739543
308	0.0571429	1
309	0.114286	0.0739543
310	0.0857143	0.32052
311	0.1	0.200566
312	0.128571	0.0378201
313	0.0571429	1
314	0.0857143	0.32052
315	0.0857143	0.32052
316	0.0714286	0.616343
317	0.0857143	0.32052
318	0.0285714	0.445335
319	0.114286	0.0739543
320	0.114286	0.0739543
321	0.0428571	0.800178
322	0.0714286	0.616343
323	0.0857143	0.32052
324	0.0857143	0.32052
325	0.0714286	0.616343
326	0.0857143	0.32052
327	0.0571429	1
328	0.0285714	0.445335
329	0.0714286	0.616343
330	0.128571	0.0378201
331	0.0857143	0.32052
332	0.0857143	0.32052
333	0.0857143	0.32052
334	0.0857143	0.32052
335	0.0714286	0.616343
336	0.0571429	1
337	0.0571429	1
338	0.0714286	0.616343
339	0.0714286	0.616343
340	0.114286	0.0739543
341	0.0571429	1
342	0.0857143	0.32052
343	0.0714286	0.616343
344	0.0571429	1
345	0.0857143	0.32052
346	0.0857143	0.32052
347	0.1	0.200566
348	0.0428571	0.800178
349	0.0857143	0.32052
350	0.0714286	0.616343
351	0.114286	0.0739543
352	0.142857	0.00953429
353	0.0285714	0.445335
354	0.0285714	0.445335
355	0.0571429	1
356	0	0.0217339
357	0.0428571	0.800178
358	0.0714286	0.616343
359	0.0857143	0.32052
360	0.0714286	0.616343
361	0.142857	0.00953429
362	0.0857143	0.32052
363	0.128571	0.0378201
364	0.0714286	0.616343
365	0.1	0.200566
366	0.1	0.200566
367	0.0428571	0.800178
368	0.0857143	0.32052
369	0.0571429	1
370	0.0857143	0.32052
371	0.0428571	0.800178
372	0.0571429	1
373	0.0571429	1
374	0.142857	0.00953429
375	0.1	0.200566
376	0.114286	0.0739543
377	0.114286	0.0739543
378	0.114286	0.0739543
379	0.1	0.200566
380	0.0571429	1
381	0.0571429	1
382	0.0571429	1
383	0.0571429	1
384	0.0714286	0.616343
385	0.1	0.200566
386	0.1	0.200566
387	0.0714286	0.616343
388	0.1	0.200566
389	0.0714286	0.616343
390	0.1	0.200566
391	0.0571429	1
392	0.128571	0.0378201
393	0.114286	0.0739543
394	0.0857143	0.32052
395	0.0571429	1
396	0.114286	0.0739543
397	0.0714286	0.616343
398	0.114286	0.0739543
399	0.1	0.200566
400	0.128571	0.0378201
401	0.0571429	1
402	0.1	0.200566
403	0.114286	0.0739543
404	0.0428571	0.800178
405	0.0428571	0.800178
406	0.0714286	0.616343
407	0.0714286	0.616343
408	0.142857	0.00953429
409	0.0714286	0.616343
410	0.0857143	0.32052
411	0.0571429	1
412	0.0285714	0.445335
413	0.0428571	0.800178
414	0.0285714	0.445335
415	0.0857143	0.32052
416	0.0714286	0.616343
417	0.0571429	1
418	0.0571429	1
419	0.128571	0.0378201
420	0.0714286	0.616343
421	0.0714286	0.616343
422	0.0857143	0.32052
423	0.0857143	0.32052
424	0.0714286	0.616343
425	0.0571429	1
426	0.114286	0.0739543
427	0.0428571	0.800178
428	0.114286	0.0739543
429	0.0857143	0.32052
430	0.0714286	0.616343
431	0.0571429	1
432	0.0714286	0.616343
433	0.0571429	1
434	0.0428571	0.800178
435	0.0857143	0.32052
436	0.0571429	1
437	0.0428571	0.800178
438	0.0857143	0.32052
439	0.0428571	0.800178
440	0	0.0217339
441	0.114286	0.0739543
442	0.0714286	0.616343
443	0.0857143	0.32052
444	0.0571429	1
445	0.128571	0.0378201
446	0.0714286	0.616343
447	0.0714286	0.616343
448	0.114286	0.0739543
449	0.0714286	0.616343
450	0.0571429	1
451	0.1	0.200566
452	0.0428571	0.800178
453	0.0571429	1
454	0.0857143	0.32052
455	0.1	0.200566
456	0.128571	0.0378201
457	0.0714286	0.616343
458	0.0857143	0.32052
459	0.0714286	0.616343
460	0.0857143	0.32052
461	0.0571429	1
462	0.0857143	0.32052
463	0.0857143	0.32052
464	0.0571429	1
465	0.0857143	0.32052
466	0.128571	0.0378201
467	0.114286	0.0739543
468	0.114286	0.0739543
469	0.0285714	0.445335
470	0.1	0.200566
471	0.114286	0.0739543
472	0.0714286	0.616343
473	0.1	0.200566
474	0.0571429	1
475	0.1	0.200566
476	0.0714286	0.616343
477	0.0428571	0.800178
478	0.0571429	1
479	0.1	0.200566
480	0.0857143	0.32052
481	0.0428571	0.800178
482	0.0571429	1
483	0.0571429	1
484	0.0714286	0.616343
485	0.0714286	0.616343
486	0.0428571	0.800178
487	0.0428571	0.800178
488	0.0714286	0.616343
489	0.0714286	0.616343
490	0.0857143	0.32052
491	0.0571429	1
492	0.0714286	0.616343
493	0.0857143	0.32052
494	0.1	0.200566
495	0.0857143	0.32052
496	0.0571429	1
497	0.0857143	0.32052
498	0.1	0.200566
499	0.0714286	0.616343
500	0.1	0.200566
501	0.0571429	1
502	0.0428571	0.800178
503	0.114286	0.0739543
504	0.0428571	0.800178
505	0.0857143	0.32052
506	0.0428571	0.800178
507	0.0571429	1
508	0.0428571	0.800178
509	0.0857143	0.32052
510	0.0857143	0.32052
511	0.0714286	0.616343
512	0.0571429	1
513	0.0714286	0.616343
514	0.0714286	0.616343
515	0.0714286	0.616343
516	0.0428571	0.800178
517	0.1	0.200566
518	0.0571429	1
519	0.0571429	1
520	0.0857143	0.32052
521	0.0714286	0.616343
522	0.0428571	0.800178
523	0.0428571	0.800178
524	0.0571429	1
525	0.0428571	0.800178
526	0.0571429	1
527	0.0857143	0.32052
528	0.1	0.200566
529	0.0571429	1
530	0.0714286	0.616343
531	0.0857143	0.32052
532	0.0142857	0.129575
533	0.0714286	0.616343
534	0.1	0.200566
535	0.0571429	1
536	0.142857	0.00953429
537	0.1	0.200566
538	0.0428571	0.800178
539	0.114286	0.0739543
540	0.0857143	0.32052
541	0.0714286	0.616343
542	0.0285714	0.445335
543	0.0571429	1
544	0.1	0.200566
545	0.171429	0.000977237
546	0.0857143	0.32052
547	0.0285714	0.445335
548	0.0285714	0.445335
549	0.0714286	0.616343
550	0.1	0.200566
551	0.0285714	0.445335
552	0.114286	0.0739543
553	0.0142857	0.129575
554	0.0285714	0.445335
555	0.0857143	0.32052
556	0.0571429	1
557	0.0714286	0.616343
558	0.0571429	1
559	0.0714286	0.616343
560	0.0857143	0.32052
561	0.114286	0.0739543
562	0.1	0.200566
563	0.0571429	1
564	0.0571429	1
565	0.0857143	0.32052
566	0.0285714	0.445335
567	0.1	0.200566
568	0.0428571	0.800178
569	0.0857143	0.32052
570	0.0714286	0.616343
571	0.0714286	0.616343
572	0.0428571	0.800178
573	0.0571429	1
574	0.0428571	0.800178
575	0.0571429	1
576	0.0714286	0.616343
577	0.114286	0.0739543
578	0.0857143	0.32052
579	0.0571429	1
580	0.114286	0.0739543
581	0.114286	0.0739543
582	0.114286	0.0739543
583	0.0857143	0.32052
584	0.1	0.200566
585	0.0571429	1
586	0.0714286	0.616343
587	0.1	0.200566
588	0.0285714	0.445335
589	0.0714286	0.616343
590	0.114286	0.0739543
591	0.0857143	0.32052
592	0.1	0.200566
593	0.0571429	1
594	0.0714286	0.616343
595	0.171429	0.000977237
596	0.142857	0.00953429
597	0.0857143	0.32052
598	0.0857143	0.32052
599	0.0571429	1
600	0.0714286	0.616343
601	0.0857143	0.32052
602	0.142857	0.00953429
603	0.1	0.200566
604	0.1	0.200566
605	0.128571	0.0378201
606	0.0857143	0.32052
607	0.142857	0.00953429
608	0.0714286	0.616343
609	0.1	0.200566
610	0.1	0.200566
611	0.0285714	0.445335
612	0.114286	0.0739543
613	0.0571429	1
614	0.0571429	1
615	0.0428571	0.800178
616	0.0714286	0.616343
617	0.0857143	0.32052
618	0.0571429	1
619	0.0714286	0.616343
620	0.0714286	0.616343
621	0.0571429	1
622	0.0285714	0.445335
623	0.0857143	0.32052
624	0.0714286	0.616343
625	0.0571429	1
626	0.0285714	0.445335
627	0.0571429	1
628	0.0714286	0.616343
629	0.0714286	0.616343
630	0.0428571	0.800178
631	0.0857143	0.32052
632	0.128571	0.0378201
633	0.0428571	0.800178
634	0.0714286	0.616343
635	0.0428571	0.800178
636	0.0857143	0.32052
637	0.0857143	0.32052
638	0.0428571	0.800178
639	0.0428571	0.800178
640	0.128571	0.0378201
641	0.1	0.200566
642	0.0857143	0.32052
643	0.0428571	0.800178
644	0.114286	0.0739543
645	0.0857143	0.32052
646	0.0714286	0.616343
647	0.0142857	0.129575
648	0.0428571	0.800178
649	0.0714286	0.616343
650	0.0714286	0.616343
651	0.142857	0.00953429
652	0.0857143	0.32052
653	0.0571429	1
654	0.0714286	0.616343
655	0.0428571	0.800178
656	0.0285714	0.445335
657	0.1	0.200566
658	0.0571429	1
659	0.0571429	1
660	0.0714286	0.616343
661	0.0428571	0.800178
662	0.0571429	1
663	0.0857143	0.32052
664	0.128571	0.0378201
665	0.0857143	0.32052
666	0.0857143	0.32052
667	0.0428571	0.800178
668	0.1	0.200566
669	0.0571429	1
670	0.0857143	0.32052
671	0.0857143	0.32052
672	0.0714286	0.616343
673	0.0857143	0.32052
674	0.0714286	0.616343
675	0.1	0.200566
676	0.1	0.200566
677	0.142857	0.00953429
678	0.0714286	0.616343
679	0.142857	0.00953429
680	0.0857143	0.32052
681	0.0285714	0.445335
682	0.1	0.200566
683	0.0857143	0.32052
684	0.0428571	0.800178
685	0.114286	0.0739543
686	0.0571429	1
687	0.0857143	0.32052
688	0.0714286	0.616343
689	0.0857143	0.32052
690	0.2	6.9288e-05
691	0.114286	0.0739543
692	0.0714286	0.616343
693	0.0857143	0.32052
694	0.0428571	0.800178
695	0.0571429	1
696	0.114286	0.0739543
697	0.0571429	1
698	0.0714286	0.616343
699	0.0857143	0.32052
700	0.142857	0.00953429
701	0.157143	0.00320391
702	0.0857143	0.32052
703	0.1	0.200566
704	0.0714286	0.616343
705	0.128571	0.0378201
706	0.0857143	0.32052
707	0.0571429	1
708	0.0857143	0.32052
709	0.0571429	1
710	0.0857143	0.32052
711	0.0714286	0.616343
712	0.0857143	0.32052
713	0.0714286	0.616343
714	0.0857143	0.32052
715	0.0571429	1
716	0.0571429	1
717	0.0857143	0.32052
718	0.0571429	1
719	0.1	0.200566
720	0.0714286	0.616343
721	0.0714286	0.616343
722	0.0428571	0.800178
723	0.0571429	1
724	0.1	0.200566
725	0.0285714	0.445335
726	0.0571429	1
727	0.0857143	0.32052
728	0.0285714	0.445335
729	0.0714286	0.616343
730	0.0857143	0.32052
731	0.0714286	0.616343
732	0.0285714	0.445335
733	0.0714286	0.616343
734	0.0857143	0.32052
735	0.0857143	0.32052
736	0.1	0.200566
737	0.0714286	0.616343
738	0.0142857	0.129575
739	0.1	0.200566
740	0.0142857	0.129575
741	0.1	0.200566
742	0.0428571	0.800178
743	0.0857143	0.32052
744	0.1	0.200566
745	0.1	0.200566
746	0.0857143	0.32052
747	0.0714286	0.616343
748	0.114286	0.0739543
749	0.142857	0.00953429
750	0.0428571	0.800178
751	0.0857143	0.32052
752	0.0714286	0.616343
753	0.0428571	0.800178
754	0.0857143	0.32052
755	0.0857143	0.32052
756	0.0428571	0.800178
757	0.0428571	0.800178
758	0.0857143	0.32052
759	0.0857143	0.32052
760	0.0428571	0.800178
761	0.1	0.200566
762	0.0714286	0.616343
763	0.0285714	0.445335
764	0.0714286	0.616343
765	0.0428571	0.800178
766	0.0428571	0.800178
767	0.0428571	0.800178
768	0.1	0.200566
769	0.1	0.200566
770	0.0571429	1
771	0.0142857	0.129575
772	0.0714286	0.616343
773	0.0428571	0.800178
774	0.0714286	0.616343
775	0.0857143	0.32052
776	0.0571429	1
777	0.0857143	0.32052
778	0.0714286	0.616343
779	0.0142857	0.129575
780	0.142857	0.00953429
781	0.1	0.200566
782	0.0714286	0.616343
783	0.114286	0.0739543
784	0.0714286	0.616343
785	0.0857143	0.32052
786	0.0285714	0.445335
787	0.0714286	0.616343
788	0.0428571	0.800178
789	0.0285714	0.445335
790	0.114286	0.0739543
791	0.0714286	0.616343
792	0.128571	0.0378201
793	0.0714286	0.616343
794	0.0285714	0.445335
795	0.0571429	1
796	0.1	0.200566
797	0.0428571	0.800178
798	0.0857143	0.32052
799	0.0857143	0.32052
800	0.0714286	0.616343
801	0.0571429	1
802	0.1	0.200566
803	0.0428571	0.800178
804	0.0571429	1
805	0.0571429	1
806	0.0714286	0.616343
807	0.0857143	0.32052
808	0.0571429	1
809	0.1	0.200566
810	0.128571	0.0378201
811	0.0428571	0.800178
812	0.0571429	1
813	0.0714286	0.616343
814	0.114286	0.0739543
815	0.0285714	0.445335
816	0.1	0.200566
817	0.142857	0.00953429
818	0.0857143	0.32052
819	0.0714286	0.616343
820	0.0571429	1
821	0.0857143	0.32052
822	0.114286	0.0739543
823	0.0714286	0.616343
824	0.1	0.200566
825	0.0285714	0.445335
826	0.0857143	0.32052
827	0.1	0.200566
828	0.0857143	0.32052
829	0.1	0.200566
830	0.0714286	0.616343
831	0.0714286	0.616343
832	0.0714286	0.616343
833	0.0714286	0.616343
834	0.0714286	0.616343
835	0.0714286	0.616343
836	0.0428571	0.800178
837	0.0428571	0.800178
838	0.0285714	0.445335
839	0.1	0.200566
840	0.0714286	0.616343
841	0.0428571	0.800178
842	0.0857143	0.32052
843	0.0571429	1
844	0.0857143	0.32052
845	0.0714286	0.616343
846	0.114286	0.0739543
847	0.0714286	0.616343
848	0.0428571	0.800178
849	0.114286	0.0739543
850	0.0571429	1
851	0	0.0217339
852	0.0714286	0.616343
853	0.0571429	1
854	0.114286	0.0739543
855	0.0571429	1
856	0.0571429	1
857	0.171429	0.000977237
858	0.0571429	1
859	0.142857	0.00953429
860	0.0714286	0.616343
861	0.0571429	1
862	0.0428571	0.800178
863	0.0142857	0.129575
864	0.142857	0.00953429
865	0.0571429	1
866	0.114286	0.0739543
867	0.0571429	1
868	0.114286	0.0739543
869	0.114286	0.0739543
870	0.1	0.200566
871	0.0714286	0.616343
872	0.1	0.200566
873	0.0714286	0.616343
874	0.0571429	1
875	0.128571	0.0378201
876	0.0571429	1
877	0.0571429	1
878	0.0142857	0.129575
879	0.0428571	0.800178
880	0.0285714	0.445335
881	0.0714286	0.616343
882	0.1	0.200566
883	0.0428571	0.800178
884	0.0571429	1
885	0.0571429	1
886	0.0714286	0.616343
887	0.0571429	1
888	0.0428571	0.800178
889	0.0142857	0.129575
890	0.1	0.200566
891	0.114286	0.0739543
892	0.0571429	1
893	0.0285714	0.445335
894	0.0714286	0.616343
895	0.1	0.200566
896	0.0285714	0.445335
897	0.0571429	1
898	0.0857143	0.32052
899	0.0571429	1
900	0.0285714	0.445335
901	0.0857143	0.32052
902	0.114286	0.0739543
903	0.128571	0.0378201
904	0.0571429	1
905	0.0142857	0.129575
906	0.0857143	0.32052
907	0.0714286	0.616343
908	0.0428571	0.800178
909	0.0857143	0.32052
910	0.0714286	0.616343
911	0.0428571	0.800178
912	0.0857143	0.32052
913	0.1	0.200566
914	0.0571429	1
915	0.0714286	0.616343
916	0	0.0217339
917	0.0428571	0.800178
918	0.1	0.200566
919	0.0571429	1
920	0.128571	0.0378201
921	0.1	0.200566
922	0.0571429	1
923	0.0857143	0.32052
924	0.0571429	1
925	0.0428571	0.800178
926	0.0571429	1
927	0.0571429	1
928	0.0428571	0.800178
929	0.0857143	0.32052
930	0.0285714	0.445335
931	0.114286	0.0739543
932	0.114286	0.0739543
933	0.0714286	0.616343
934	0.0571429	1
935	0.0428571	0.800178
936	0.1	0.200566
937	0.0285714	0.445335
938	0.0857143	0.32052
939	0.0428571	0.800178
940	0.0714286	0.616343
941	0.1	0.200566
942	0.0428571	0.800178
943	0.142857	0.00953429
944	0.0857143	0.32052
945	0.0714286	0.616343
946	0.0714286	0.616343
947	0.0428571	0.800178
948	0.0571429	1
949	0.0571429	1
950	0.0428571	0.800178
951	0.0714286	0.616343
952	0.0714286	0.616343
953	0.1	0.200566
954	0.0428571	0.800178
955	0.0714286	0.616343
956	0.114286	0.0739543
957	0.0857143	0.32052
958	0.0428571	0.800178
959	0.0428571	0.800178
960	0.1	0.200566
961	0.0714286	0.616343
962	0.0857143	0.32052
963	0.0571429	1
964	0.1	0.200566
965	0.0571429	1
966	0.0857143	0.32052
967	0.0571429	1
968	0.1	0.200566
969	0.0857143	0.32052
970	0.0857143	0.32052
971	0.0571429	1
972	0.0571429	1
973	0.0285714	0.445335
974	0.0857143	0.32052
975	0.0428571	0.800178
976	0.0857143	0.32052
977	0.0571429	1
978	0.0428571	0.800178
979	0.0714286	0.616343
980	0.114286	0.0739543
981	0.0571429	1
982	0.0857143	0.32052
983	0.0857143	0.32052
984	0.0857143	0.32052
985	0.0714286	0.616343
986	0.0571429	1
987	0.0571429	1
988	0.0857143	0.32052
989	0.114286	0.0739543
990	0.0857143	0.32052
991	0.0714286	0.616343
992	0.1	0.200566
993	0.0428571	0.800178
994	0.0714286	0.616343
995	0.0571429	1
996	0.0857143	0.32052
997	0.0714286	0.616343
998	0.0857143	0.32052
999	0.0428571	0.800178
1000	0.0714286	0.616343

## Sheet: DRsexDEG_f_control
	enrichment	pvalue	Median pvalue
1	0.117647	0.760668	0.0537607
2	0.171946	0.0537607
3	0.208145	0.000751043
4	0.18552	0.0144564
5	0.153846	0.263677
6	0.158371	0.186461
7	0.140271	0.543888
8	0.20362	0.00153444
9	0.153846	0.263677
10	0.144796	0.418607
11	0.153846	0.263677
12	0.176471	0.0332331
13	0.199095	0.00305371
14	0.135747	0.685645
15	0.176471	0.0332331
16	0.135747	0.685645
17	0.167421	0.0841776
18	0.20362	0.00153444
19	0.135747	0.685645
20	0.158371	0.186461
21	0.208145	0.000751043
22	0.190045	0.00808464
23	0.19457	0.00438798
24	0.167421	0.0841776
25	0.162896	0.12744
26	0.262443	6.81364e-08
27	0.20362	0.00153444
28	0.167421	0.0841776
29	0.190045	0.00808464
30	0.122172	0.919136
31	0.180995	0.0250067
32	0.18552	0.0144564
33	0.158371	0.186461
34	0.18552	0.0144564
35	0.153846	0.263677
36	0.18552	0.0144564
37	0.171946	0.0537607
38	0.158371	0.186461
39	0.20362	0.00153444
40	0.190045	0.00808464
41	0.171946	0.0537607
42	0.217195	0.000224501
43	0.135747	0.685645
44	0.122172	0.919136
45	0.176471	0.0332331
46	0.176471	0.0332331
47	0.158371	0.186461
48	0.180995	0.0250067
49	0.167421	0.0841776
50	0.176471	0.0332331
51	0.144796	0.418607
52	0.162896	0.12744
53	0.135747	0.685645
54	0.149321	0.360547
55	0.162896	0.12744
56	0.171946	0.0537607
57	0.208145	0.000751043
58	0.171946	0.0537607
59	0.208145	0.000751043
60	0.167421	0.0841776
61	0.167421	0.0841776
62	0.176471	0.0332331
63	0.199095	0.00305371
64	0.18552	0.0144564
65	0.149321	0.360547
66	0.158371	0.186461
67	0.176471	0.0332331
68	0.131222	0.839581
69	0.180995	0.0250067
70	0.217195	0.000224501
71	0.158371	0.186461
72	0.167421	0.0841776
73	0.113122	0.611607
74	0.171946	0.0537607
75	0.135747	0.685645
76	0.208145	0.000751043
77	0.176471	0.0332331
78	0.19457	0.00438798
79	0.131222	0.839581
80	0.153846	0.263677
81	0.158371	0.186461
82	0.149321	0.360547
83	0.167421	0.0841776
84	0.167421	0.0841776
85	0.158371	0.186461
86	0.217195	0.000224501
87	0.158371	0.186461
88	0.140271	0.543888
89	0.167421	0.0841776
90	0.19457	0.00438798
91	0.208145	0.000751043
92	0.199095	0.00305371
93	0.167421	0.0841776
94	0.199095	0.00305371
95	0.149321	0.360547
96	0.208145	0.000751043
97	0.180995	0.0250067
98	0.208145	0.000751043
99	0.19457	0.00438798
100	0.171946	0.0537607
101	0.171946	0.0537607
102	0.140271	0.543888
103	0.208145	0.000751043
104	0.199095	0.00305371
105	0.190045	0.00808464
106	0.19457	0.00438798
107	0.199095	0.00305371
108	0.190045	0.00808464
109	0.176471	0.0332331
110	0.230769	2.49828e-05
111	0.208145	0.000751043
112	0.131222	0.839581
113	0.180995	0.0250067
114	0.217195	0.000224501
115	0.176471	0.0332331
116	0.135747	0.685645
117	0.162896	0.12744
118	0.180995	0.0250067
119	0.149321	0.360547
120	0.208145	0.000751043
121	0.208145	0.000751043
122	0.19457	0.00438798
123	0.171946	0.0537607
124	0.153846	0.263677
125	0.21267	0.000360472
126	0.140271	0.543888
127	0.171946	0.0537607
128	0.144796	0.418607
129	0.149321	0.360547
130	0.167421	0.0841776
131	0.158371	0.186461
132	0.18552	0.0144564
133	0.158371	0.186461
134	0.190045	0.00808464
135	0.162896	0.12744
136	0.153846	0.263677
137	0.144796	0.418607
138	0.135747	0.685645
139	0.162896	0.12744
140	0.190045	0.00808464
141	0.158371	0.186461
142	0.171946	0.0537607
143	0.199095	0.00305371
144	0.162896	0.12744
145	0.199095	0.00305371
146	0.19457	0.00438798
147	0.180995	0.0250067
148	0.144796	0.418607
149	0.190045	0.00808464
150	0.158371	0.186461
151	0.149321	0.360547
152	0.180995	0.0250067
153	0.149321	0.360547
154	0.131222	0.839581
155	0.153846	0.263677
156	0.158371	0.186461
157	0.176471	0.0332331
158	0.20362	0.00153444
159	0.131222	0.839581
160	0.18552	0.0144564
161	0.180995	0.0250067
162	0.180995	0.0250067
163	0.180995	0.0250067
164	0.171946	0.0537607
165	0.171946	0.0537607
166	0.171946	0.0537607
167	0.162896	0.12744
168	0.162896	0.12744
169	0.167421	0.0841776
170	0.153846	0.263677
171	0.180995	0.0250067
172	0.144796	0.418607
173	0.20362	0.00153444
174	0.190045	0.00808464
175	0.149321	0.360547
176	0.167421	0.0841776
177	0.176471	0.0332331
178	0.171946	0.0537607
179	0.190045	0.00808464
180	0.140271	0.543888
181	0.21267	0.000360472
182	0.149321	0.360547
183	0.208145	0.000751043
184	0.153846	0.263677
185	0.19457	0.00438798
186	0.162896	0.12744
187	0.20362	0.00153444
188	0.171946	0.0537607
189	0.167421	0.0841776
190	0.208145	0.000751043
191	0.149321	0.360547
192	0.167421	0.0841776
193	0.20362	0.00153444
194	0.19457	0.00438798
195	0.153846	0.263677
196	0.122172	0.919136
197	0.18552	0.0144564
198	0.199095	0.00305371
199	0.180995	0.0250067
200	0.176471	0.0332331
201	0.21267	0.000360472
202	0.20362	0.00153444
203	0.162896	0.12744
204	0.208145	0.000751043
205	0.140271	0.543888
206	0.19457	0.00438798
207	0.153846	0.263677
208	0.190045	0.00808464
209	0.176471	0.0332331
210	0.199095	0.00305371
211	0.153846	0.263677
212	0.180995	0.0250067
213	0.190045	0.00808464
214	0.153846	0.263677
215	0.153846	0.263677
216	0.158371	0.186461
217	0.176471	0.0332331
218	0.176471	0.0332331
219	0.171946	0.0537607
220	0.140271	0.543888
221	0.171946	0.0537607
222	0.180995	0.0250067
223	0.153846	0.263677
224	0.167421	0.0841776
225	0.190045	0.00808464
226	0.19457	0.00438798
227	0.176471	0.0332331
228	0.21267	0.000360472
229	0.153846	0.263677
230	0.140271	0.543888
231	0.171946	0.0537607
232	0.18552	0.0144564
233	0.180995	0.0250067
234	0.18552	0.0144564
235	0.126697	1
236	0.199095	0.00305371
237	0.180995	0.0250067
238	0.176471	0.0332331
239	0.167421	0.0841776
240	0.140271	0.543888
241	0.180995	0.0250067
242	0.18552	0.0144564
243	0.171946	0.0537607
244	0.158371	0.186461
245	0.140271	0.543888
246	0.208145	0.000751043
247	0.176471	0.0332331
248	0.144796	0.418607
249	0.176471	0.0332331
250	0.158371	0.186461
251	0.162896	0.12744
252	0.19457	0.00438798
253	0.122172	0.919136
254	0.171946	0.0537607
255	0.153846	0.263677
256	0.190045	0.00808464
257	0.176471	0.0332331
258	0.140271	0.543888
259	0.144796	0.418607
260	0.158371	0.186461
261	0.158371	0.186461
262	0.199095	0.00305371
263	0.149321	0.360547
264	0.171946	0.0537607
265	0.21267	0.000360472
266	0.230769	2.49828e-05
267	0.20362	0.00153444
268	0.122172	0.919136
269	0.180995	0.0250067
270	0.176471	0.0332331
271	0.199095	0.00305371
272	0.221719	9.9059e-05
273	0.176471	0.0332331
274	0.19457	0.00438798
275	0.158371	0.186461
276	0.149321	0.360547
277	0.113122	0.611607
278	0.167421	0.0841776
279	0.167421	0.0841776
280	0.20362	0.00153444
281	0.140271	0.543888
282	0.18552	0.0144564
283	0.171946	0.0537607
284	0.171946	0.0537607
285	0.162896	0.12744
286	0.176471	0.0332331
287	0.162896	0.12744
288	0.153846	0.263677
289	0.171946	0.0537607
290	0.167421	0.0841776
291	0.180995	0.0250067
292	0.18552	0.0144564
293	0.144796	0.418607
294	0.176471	0.0332331
295	0.190045	0.00808464
296	0.208145	0.000751043
297	0.18552	0.0144564
298	0.167421	0.0841776
299	0.144796	0.418607
300	0.176471	0.0332331
301	0.19457	0.00438798
302	0.199095	0.00305371
303	0.167421	0.0841776
304	0.18552	0.0144564
305	0.153846	0.263677
306	0.131222	0.839581
307	0.162896	0.12744
308	0.226244	4.33861e-05
309	0.171946	0.0537607
310	0.18552	0.0144564
311	0.153846	0.263677
312	0.171946	0.0537607
313	0.176471	0.0332331
314	0.190045	0.00808464
315	0.144796	0.418607
316	0.158371	0.186461
317	0.162896	0.12744
318	0.208145	0.000751043
319	0.167421	0.0841776
320	0.176471	0.0332331
321	0.149321	0.360547
322	0.19457	0.00438798
323	0.19457	0.00438798
324	0.171946	0.0537607
325	0.176471	0.0332331
326	0.167421	0.0841776
327	0.180995	0.0250067
328	0.140271	0.543888
329	0.199095	0.00305371
330	0.239819	5.77676e-06
331	0.208145	0.000751043
332	0.140271	0.543888
333	0.162896	0.12744
334	0.208145	0.000751043
335	0.180995	0.0250067
336	0.162896	0.12744
337	0.190045	0.00808464
338	0.158371	0.186461
339	0.176471	0.0332331
340	0.171946	0.0537607
341	0.144796	0.418607
342	0.153846	0.263677
343	0.149321	0.360547
344	0.176471	0.0332331
345	0.18552	0.0144564
346	0.180995	0.0250067
347	0.176471	0.0332331
348	0.180995	0.0250067
349	0.153846	0.263677
350	0.135747	0.685645
351	0.217195	0.000224501
352	0.21267	0.000360472
353	0.144796	0.418607
354	0.144796	0.418607
355	0.19457	0.00438798
356	0.199095	0.00305371
357	0.190045	0.00808464
358	0.190045	0.00808464
359	0.180995	0.0250067
360	0.21267	0.000360472
361	0.167421	0.0841776
362	0.167421	0.0841776
363	0.199095	0.00305371
364	0.176471	0.0332331
365	0.171946	0.0537607
366	0.140271	0.543888
367	0.18552	0.0144564
368	0.18552	0.0144564
369	0.158371	0.186461
370	0.162896	0.12744
371	0.153846	0.263677
372	0.162896	0.12744
373	0.176471	0.0332331
374	0.158371	0.186461
375	0.158371	0.186461
376	0.19457	0.00438798
377	0.180995	0.0250067
378	0.171946	0.0537607
379	0.162896	0.12744
380	0.199095	0.00305371
381	0.180995	0.0250067
382	0.171946	0.0537607
383	0.20362	0.00153444
384	0.167421	0.0841776
385	0.19457	0.00438798
386	0.162896	0.12744
387	0.171946	0.0537607
388	0.167421	0.0841776
389	0.199095	0.00305371
390	0.140271	0.543888
391	0.18552	0.0144564
392	0.19457	0.00438798
393	0.20362	0.00153444
394	0.176471	0.0332331
395	0.162896	0.12744
396	0.158371	0.186461
397	0.19457	0.00438798
398	0.190045	0.00808464
399	0.208145	0.000751043
400	0.140271	0.543888
401	0.18552	0.0144564
402	0.19457	0.00438798
403	0.171946	0.0537607
404	0.18552	0.0144564
405	0.167421	0.0841776
406	0.144796	0.418607
407	0.20362	0.00153444
408	0.131222	0.839581
409	0.19457	0.00438798
410	0.21267	0.000360472
411	0.18552	0.0144564
412	0.199095	0.00305371
413	0.176471	0.0332331
414	0.176471	0.0332331
415	0.190045	0.00808464
416	0.144796	0.418607
417	0.21267	0.000360472
418	0.221719	9.9059e-05
419	0.180995	0.0250067
420	0.171946	0.0537607
421	0.144796	0.418607
422	0.153846	0.263677
423	0.176471	0.0332331
424	0.171946	0.0537607
425	0.180995	0.0250067
426	0.176471	0.0332331
427	0.180995	0.0250067
428	0.18552	0.0144564
429	0.126697	1
430	0.180995	0.0250067
431	0.167421	0.0841776
432	0.153846	0.263677
433	0.153846	0.263677
434	0.140271	0.543888
435	0.149321	0.360547
436	0.176471	0.0332331
437	0.167421	0.0841776
438	0.144796	0.418607
439	0.180995	0.0250067
440	0.153846	0.263677
441	0.18552	0.0144564
442	0.140271	0.543888
443	0.19457	0.00438798
444	0.171946	0.0537607
445	0.208145	0.000751043
446	0.149321	0.360547
447	0.208145	0.000751043
448	0.19457	0.00438798
449	0.180995	0.0250067
450	0.167421	0.0841776
451	0.149321	0.360547
452	0.208145	0.000751043
453	0.126697	1
454	0.20362	0.00153444
455	0.162896	0.12744
456	0.171946	0.0537607
457	0.171946	0.0537607
458	0.149321	0.360547
459	0.176471	0.0332331
460	0.176471	0.0332331
461	0.180995	0.0250067
462	0.135747	0.685645
463	0.190045	0.00808464
464	0.149321	0.360547
465	0.171946	0.0537607
466	0.167421	0.0841776
467	0.158371	0.186461
468	0.158371	0.186461
469	0.149321	0.360547
470	0.190045	0.00808464
471	0.153846	0.263677
472	0.153846	0.263677
473	0.126697	1
474	0.171946	0.0537607
475	0.167421	0.0841776
476	0.180995	0.0250067
477	0.153846	0.263677
478	0.167421	0.0841776
479	0.19457	0.00438798
480	0.19457	0.00438798
481	0.190045	0.00808464
482	0.180995	0.0250067
483	0.171946	0.0537607
484	0.171946	0.0537607
485	0.144796	0.418607
486	0.199095	0.00305371
487	0.135747	0.685645
488	0.135747	0.685645
489	0.167421	0.0841776
490	0.144796	0.418607
491	0.180995	0.0250067
492	0.190045	0.00808464
493	0.208145	0.000751043
494	0.21267	0.000360472
495	0.162896	0.12744
496	0.158371	0.186461
497	0.153846	0.263677
498	0.144796	0.418607
499	0.140271	0.543888
500	0.171946	0.0537607
501	0.19457	0.00438798
502	0.167421	0.0841776
503	0.158371	0.186461
504	0.208145	0.000751043
505	0.167421	0.0841776
506	0.180995	0.0250067
507	0.167421	0.0841776
508	0.176471	0.0332331
509	0.18552	0.0144564
510	0.226244	4.33861e-05
511	0.158371	0.186461
512	0.167421	0.0841776
513	0.18552	0.0144564
514	0.208145	0.000751043
515	0.18552	0.0144564
516	0.140271	0.543888
517	0.144796	0.418607
518	0.131222	0.839581
519	0.171946	0.0537607
520	0.190045	0.00808464
521	0.167421	0.0841776
522	0.149321	0.360547
523	0.162896	0.12744
524	0.149321	0.360547
525	0.162896	0.12744
526	0.21267	0.000360472
527	0.126697	1
528	0.171946	0.0537607
529	0.149321	0.360547
530	0.149321	0.360547
531	0.176471	0.0332331
532	0.158371	0.186461
533	0.167421	0.0841776
534	0.158371	0.186461
535	0.158371	0.186461
536	0.153846	0.263677
537	0.180995	0.0250067
538	0.171946	0.0537607
539	0.217195	0.000224501
540	0.190045	0.00808464
541	0.199095	0.00305371
542	0.140271	0.543888
543	0.131222	0.839581
544	0.167421	0.0841776
545	0.153846	0.263677
546	0.180995	0.0250067
547	0.144796	0.418607
548	0.199095	0.00305371
549	0.131222	0.839581
550	0.158371	0.186461
551	0.20362	0.00153444
552	0.135747	0.685645
553	0.171946	0.0537607
554	0.140271	0.543888
555	0.140271	0.543888
556	0.190045	0.00808464
557	0.162896	0.12744
558	0.217195	0.000224501
559	0.162896	0.12744
560	0.20362	0.00153444
561	0.167421	0.0841776
562	0.167421	0.0841776
563	0.18552	0.0144564
564	0.171946	0.0537607
565	0.153846	0.263677
566	0.199095	0.00305371
567	0.144796	0.418607
568	0.167421	0.0841776
569	0.162896	0.12744
570	0.171946	0.0537607
571	0.153846	0.263677
572	0.167421	0.0841776
573	0.149321	0.360547
574	0.162896	0.12744
575	0.144796	0.418607
576	0.176471	0.0332331
577	0.20362	0.00153444
578	0.180995	0.0250067
579	0.190045	0.00808464
580	0.176471	0.0332331
581	0.176471	0.0332331
582	0.162896	0.12744
583	0.19457	0.00438798
584	0.131222	0.839581
585	0.221719	9.9059e-05
586	0.230769	2.49828e-05
587	0.149321	0.360547
588	0.162896	0.12744
589	0.230769	2.49828e-05
590	0.19457	0.00438798
591	0.158371	0.186461
592	0.144796	0.418607
593	0.190045	0.00808464
594	0.20362	0.00153444
595	0.176471	0.0332331
596	0.199095	0.00305371
597	0.126697	1
598	0.158371	0.186461
599	0.153846	0.263677
600	0.162896	0.12744
601	0.18552	0.0144564
602	0.158371	0.186461
603	0.167421	0.0841776
604	0.176471	0.0332331
605	0.19457	0.00438798
606	0.167421	0.0841776
607	0.208145	0.000751043
608	0.171946	0.0537607
609	0.190045	0.00808464
610	0.18552	0.0144564
611	0.19457	0.00438798
612	0.226244	4.33861e-05
613	0.18552	0.0144564
614	0.190045	0.00808464
615	0.199095	0.00305371
616	0.176471	0.0332331
617	0.19457	0.00438798
618	0.167421	0.0841776
619	0.153846	0.263677
620	0.221719	9.9059e-05
621	0.199095	0.00305371
622	0.162896	0.12744
623	0.162896	0.12744
624	0.140271	0.543888
625	0.149321	0.360547
626	0.176471	0.0332331
627	0.180995	0.0250067
628	0.167421	0.0841776
629	0.208145	0.000751043
630	0.167421	0.0841776
631	0.18552	0.0144564
632	0.162896	0.12744
633	0.180995	0.0250067
634	0.19457	0.00438798
635	0.162896	0.12744
636	0.180995	0.0250067
637	0.199095	0.00305371
638	0.208145	0.000751043
639	0.190045	0.00808464
640	0.208145	0.000751043
641	0.18552	0.0144564
642	0.162896	0.12744
643	0.131222	0.839581
644	0.20362	0.00153444
645	0.248869	7.91974e-07
646	0.144796	0.418607
647	0.190045	0.00808464
648	0.140271	0.543888
649	0.158371	0.186461
650	0.18552	0.0144564
651	0.217195	0.000224501
652	0.180995	0.0250067
653	0.167421	0.0841776
654	0.217195	0.000224501
655	0.199095	0.00305371
656	0.21267	0.000360472
657	0.149321	0.360547
658	0.190045	0.00808464
659	0.131222	0.839581
660	0.158371	0.186461
661	0.167421	0.0841776
662	0.167421	0.0841776
663	0.153846	0.263677
664	0.190045	0.00808464
665	0.171946	0.0537607
666	0.158371	0.186461
667	0.162896	0.12744
668	0.162896	0.12744
669	0.149321	0.360547
670	0.19457	0.00438798
671	0.153846	0.263677
672	0.21267	0.000360472
673	0.199095	0.00305371
674	0.149321	0.360547
675	0.144796	0.418607
676	0.190045	0.00808464
677	0.176471	0.0332331
678	0.167421	0.0841776
679	0.158371	0.186461
680	0.230769	2.49828e-05
681	0.149321	0.360547
682	0.167421	0.0841776
683	0.230769	2.49828e-05
684	0.153846	0.263677
685	0.153846	0.263677
686	0.144796	0.418607
687	0.190045	0.00808464
688	0.171946	0.0537607
689	0.208145	0.000751043
690	0.176471	0.0332331
691	0.176471	0.0332331
692	0.190045	0.00808464
693	0.167421	0.0841776
694	0.18552	0.0144564
695	0.171946	0.0537607
696	0.18552	0.0144564
697	0.199095	0.00305371
698	0.18552	0.0144564
699	0.176471	0.0332331
700	0.180995	0.0250067
701	0.158371	0.186461
702	0.167421	0.0841776
703	0.162896	0.12744
704	0.162896	0.12744
705	0.19457	0.00438798
706	0.190045	0.00808464
707	0.158371	0.186461
708	0.19457	0.00438798
709	0.171946	0.0537607
710	0.180995	0.0250067
711	0.19457	0.00438798
712	0.162896	0.12744
713	0.18552	0.0144564
714	0.158371	0.186461
715	0.131222	0.839581
716	0.199095	0.00305371
717	0.167421	0.0841776
718	0.18552	0.0144564
719	0.19457	0.00438798
720	0.149321	0.360547
721	0.208145	0.000751043
722	0.235294	1.0034e-05
723	0.208145	0.000751043
724	0.158371	0.186461
725	0.117647	0.760668
726	0.176471	0.0332331
727	0.20362	0.00153444
728	0.171946	0.0537607
729	0.149321	0.360547
730	0.126697	1
731	0.199095	0.00305371
732	0.171946	0.0537607
733	0.19457	0.00438798
734	0.180995	0.0250067
735	0.221719	9.9059e-05
736	0.135747	0.685645
737	0.208145	0.000751043
738	0.19457	0.00438798
739	0.135747	0.685645
740	0.158371	0.186461
741	0.144796	0.418607
742	0.167421	0.0841776
743	0.176471	0.0332331
744	0.176471	0.0332331
745	0.21267	0.000360472
746	0.162896	0.12744
747	0.140271	0.543888
748	0.18552	0.0144564
749	0.208145	0.000751043
750	0.153846	0.263677
751	0.171946	0.0537607
752	0.153846	0.263677
753	0.144796	0.418607
754	0.176471	0.0332331
755	0.180995	0.0250067
756	0.153846	0.263677
757	0.167421	0.0841776
758	0.171946	0.0537607
759	0.190045	0.00808464
760	0.20362	0.00153444
761	0.153846	0.263677
762	0.176471	0.0332331
763	0.162896	0.12744
764	0.153846	0.263677
765	0.149321	0.360547
766	0.244344	2.10797e-06
767	0.167421	0.0841776
768	0.140271	0.543888
769	0.149321	0.360547
770	0.20362	0.00153444
771	0.208145	0.000751043
772	0.208145	0.000751043
773	0.167421	0.0841776
774	0.208145	0.000751043
775	0.180995	0.0250067
776	0.171946	0.0537607
777	0.153846	0.263677
778	0.21267	0.000360472
779	0.199095	0.00305371
780	0.158371	0.186461
781	0.190045	0.00808464
782	0.158371	0.186461
783	0.176471	0.0332331
784	0.144796	0.418607
785	0.153846	0.263677
786	0.190045	0.00808464
787	0.180995	0.0250067
788	0.180995	0.0250067
789	0.176471	0.0332331
790	0.21267	0.000360472
791	0.153846	0.263677
792	0.20362	0.00153444
793	0.167421	0.0841776
794	0.149321	0.360547
795	0.144796	0.418607
796	0.171946	0.0537607
797	0.131222	0.839581
798	0.162896	0.12744
799	0.171946	0.0537607
800	0.144796	0.418607
801	0.171946	0.0537607
802	0.208145	0.000751043
803	0.226244	4.33861e-05
804	0.135747	0.685645
805	0.190045	0.00808464
806	0.167421	0.0841776
807	0.131222	0.839581
808	0.144796	0.418607
809	0.176471	0.0332331
810	0.190045	0.00808464
811	0.176471	0.0332331
812	0.167421	0.0841776
813	0.153846	0.263677
814	0.176471	0.0332331
815	0.162896	0.12744
816	0.21267	0.000360472
817	0.158371	0.186461
818	0.19457	0.00438798
819	0.221719	9.9059e-05
820	0.144796	0.418607
821	0.131222	0.839581
822	0.176471	0.0332331
823	0.176471	0.0332331
824	0.162896	0.12744
825	0.162896	0.12744
826	0.144796	0.418607
827	0.180995	0.0250067
828	0.217195	0.000224501
829	0.180995	0.0250067
830	0.19457	0.00438798
831	0.158371	0.186461
832	0.171946	0.0537607
833	0.135747	0.685645
834	0.171946	0.0537607
835	0.199095	0.00305371
836	0.180995	0.0250067
837	0.158371	0.186461
838	0.176471	0.0332331
839	0.180995	0.0250067
840	0.190045	0.00808464
841	0.180995	0.0250067
842	0.176471	0.0332331
843	0.180995	0.0250067
844	0.167421	0.0841776
845	0.104072	0.311907
846	0.18552	0.0144564
847	0.171946	0.0537607
848	0.153846	0.263677
849	0.149321	0.360547
850	0.167421	0.0841776
851	0.226244	4.33861e-05
852	0.18552	0.0144564
853	0.180995	0.0250067
854	0.208145	0.000751043
855	0.18552	0.0144564
856	0.18552	0.0144564
857	0.167421	0.0841776
858	0.20362	0.00153444
859	0.171946	0.0537607
860	0.149321	0.360547
861	0.162896	0.12744
862	0.158371	0.186461
863	0.190045	0.00808464
864	0.18552	0.0144564
865	0.149321	0.360547
866	0.171946	0.0537607
867	0.190045	0.00808464
868	0.131222	0.839581
869	0.190045	0.00808464
870	0.18552	0.0144564
871	0.144796	0.418607
872	0.20362	0.00153444
873	0.190045	0.00808464
874	0.21267	0.000360472
875	0.135747	0.685645
876	0.158371	0.186461
877	0.208145	0.000751043
878	0.126697	1
879	0.190045	0.00808464
880	0.171946	0.0537607
881	0.144796	0.418607
882	0.171946	0.0537607
883	0.20362	0.00153444
884	0.180995	0.0250067
885	0.180995	0.0250067
886	0.20362	0.00153444
887	0.208145	0.000751043
888	0.135747	0.685645
889	0.131222	0.839581
890	0.18552	0.0144564
891	0.19457	0.00438798
892	0.19457	0.00438798
893	0.153846	0.263677
894	0.149321	0.360547
895	0.162896	0.12744
896	0.217195	0.000224501
897	0.230769	2.49828e-05
898	0.171946	0.0537607
899	0.135747	0.685645
900	0.19457	0.00438798
901	0.18552	0.0144564
902	0.158371	0.186461
903	0.21267	0.000360472
904	0.144796	0.418607
905	0.199095	0.00305371
906	0.226244	4.33861e-05
907	0.167421	0.0841776
908	0.162896	0.12744
909	0.144796	0.418607
910	0.190045	0.00808464
911	0.171946	0.0537607
912	0.162896	0.12744
913	0.171946	0.0537607
914	0.144796	0.418607
915	0.176471	0.0332331
916	0.18552	0.0144564
917	0.180995	0.0250067
918	0.180995	0.0250067
919	0.149321	0.360547
920	0.144796	0.418607
921	0.153846	0.263677
922	0.180995	0.0250067
923	0.158371	0.186461
924	0.199095	0.00305371
925	0.18552	0.0144564
926	0.149321	0.360547
927	0.171946	0.0537607
928	0.176471	0.0332331
929	0.167421	0.0841776
930	0.171946	0.0537607
931	0.190045	0.00808464
932	0.21267	0.000360472
933	0.144796	0.418607
934	0.158371	0.186461
935	0.158371	0.186461
936	0.176471	0.0332331
937	0.180995	0.0250067
938	0.167421	0.0841776
939	0.190045	0.00808464
940	0.158371	0.186461
941	0.176471	0.0332331
942	0.153846	0.263677
943	0.158371	0.186461
944	0.171946	0.0537607
945	0.131222	0.839581
946	0.18552	0.0144564
947	0.167421	0.0841776
948	0.149321	0.360547
949	0.167421	0.0841776
950	0.176471	0.0332331
951	0.162896	0.12744
952	0.19457	0.00438798
953	0.208145	0.000751043
954	0.21267	0.000360472
955	0.153846	0.263677
956	0.171946	0.0537607
957	0.167421	0.0841776
958	0.226244	4.33861e-05
959	0.149321	0.360547
960	0.167421	0.0841776
961	0.171946	0.0537607
962	0.171946	0.0537607
963	0.153846	0.263677
964	0.135747	0.685645
965	0.19457	0.00438798
966	0.18552	0.0144564
967	0.180995	0.0250067
968	0.140271	0.543888
969	0.21267	0.000360472
970	0.131222	0.839581
971	0.176471	0.0332331
972	0.208145	0.000751043
973	0.19457	0.00438798
974	0.176471	0.0332331
975	0.149321	0.360547
976	0.153846	0.263677
977	0.140271	0.543888
978	0.149321	0.360547
979	0.176471	0.0332331
980	0.176471	0.0332331
981	0.18552	0.0144564
982	0.167421	0.0841776
983	0.20362	0.00153444
984	0.190045	0.00808464
985	0.180995	0.0250067
986	0.162896	0.12744
987	0.176471	0.0332331
988	0.180995	0.0250067
989	0.19457	0.00438798
990	0.149321	0.360547
991	0.131222	0.839581
992	0.131222	0.839581
993	0.113122	0.611607
994	0.153846	0.263677
995	0.180995	0.0250067
996	0.18552	0.0144564
997	0.140271	0.543888
998	0.171946	0.0537607
999	0.190045	0.00808464
1000	0.20362	0.00153444

## Sheet: DRsexDEG_m_control
	enrichment	pvalue	Median pvalue
1	0.1	0.714851	0.463453
2	0.114286	1
3	0.2	0.0628336
4	0.128571	0.853722
5	0.128571	0.853722
6	0.157143	0.356689
7	0.185714	0.0992339
8	0.114286	1
9	0.242857	0.0047663
10	0.214286	0.0255549
11	0.1	0.714851
12	0.171429	0.197674
13	0.1	0.714851
14	0.2	0.0628336
15	0.0714286	0.269022
16	0.228571	0.00970727
17	0.171429	0.197674
18	0.1	0.714851
19	0.128571	0.853722
20	0.171429	0.197674
21	0.1	0.714851
22	0.242857	0.0047663
23	0.171429	0.197674
24	0.142857	0.580149
25	0.185714	0.0992339
26	0.228571	0.00970727
27	0.2	0.0628336
28	0.185714	0.0992339
29	0.128571	0.853722
30	0.1	0.714851
31	0.1	0.714851
32	0.214286	0.0255549
33	0.114286	1
34	0.128571	0.853722
35	0.0571429	0.13831
36	0.0857143	0.463453
37	0.157143	0.356689
38	0.0857143	0.463453
39	0.128571	0.853722
40	0.185714	0.0992339
41	0.128571	0.853722
42	0.157143	0.356689
43	0.185714	0.0992339
44	0.128571	0.853722
45	0.142857	0.580149
46	0.171429	0.197674
47	0.128571	0.853722
48	0.128571	0.853722
49	0.214286	0.0255549
50	0.114286	1
51	0.142857	0.580149
52	0.185714	0.0992339
53	0.128571	0.853722
54	0.157143	0.356689
55	0.185714	0.0992339
56	0.185714	0.0992339
57	0.157143	0.356689
58	0.0714286	0.269022
59	0.142857	0.580149
60	0.157143	0.356689
61	0.128571	0.853722
62	0.128571	0.853722
63	0.142857	0.580149
64	0.171429	0.197674
65	0.185714	0.0992339
66	0.157143	0.356689
67	0.114286	1
68	0.157143	0.356689
69	0.142857	0.580149
70	0.185714	0.0992339
71	0.142857	0.580149
72	0.114286	1
73	0.2	0.0628336
74	0.171429	0.197674
75	0.171429	0.197674
76	0.214286	0.0255549
77	0.157143	0.356689
78	0.142857	0.580149
79	0.1	0.714851
80	0.185714	0.0992339
81	0.1	0.714851
82	0.171429	0.197674
83	0.185714	0.0992339
84	0.128571	0.853722
85	0.157143	0.356689
86	0.128571	0.853722
87	0.114286	1
88	0.171429	0.197674
89	0.114286	1
90	0.1	0.714851
91	0.1	0.714851
92	0.1	0.714851
93	0.1	0.714851
94	0.114286	1
95	0.114286	1
96	0.214286	0.0255549
97	0.157143	0.356689
98	0.185714	0.0992339
99	0.185714	0.0992339
100	0.185714	0.0992339
101	0.2	0.0628336
102	0.142857	0.580149
103	0.2	0.0628336
104	0.142857	0.580149
105	0.114286	1
106	0.228571	0.00970727
107	0.185714	0.0992339
108	0.2	0.0628336
109	0.157143	0.356689
110	0.157143	0.356689
111	0.157143	0.356689
112	0.114286	1
113	0.185714	0.0992339
114	0.2	0.0628336
115	0.185714	0.0992339
116	0.157143	0.356689
117	0.128571	0.853722
118	0.142857	0.580149
119	0.214286	0.0255549
120	0.142857	0.580149
121	0.185714	0.0992339
122	0.114286	1
123	0.114286	1
124	0.142857	0.580149
125	0.185714	0.0992339
126	0.157143	0.356689
127	0.128571	0.853722
128	0.128571	0.853722
129	0.128571	0.853722
130	0.142857	0.580149
131	0.185714	0.0992339
132	0.157143	0.356689
133	0.157143	0.356689
134	0.114286	1
135	0.2	0.0628336
136	0.0857143	0.463453
137	0.142857	0.580149
138	0.128571	0.853722
139	0.142857	0.580149
140	0.185714	0.0992339
141	0.185714	0.0992339
142	0.2	0.0628336
143	0.128571	0.853722
144	0.142857	0.580149
145	0.171429	0.197674
146	0.185714	0.0992339
147	0.1	0.714851
148	0.2	0.0628336
149	0.128571	0.853722
150	0.214286	0.0255549
151	0.157143	0.356689
152	0.142857	0.580149
153	0.0857143	0.463453
154	0.2	0.0628336
155	0.142857	0.580149
156	0.128571	0.853722
157	0.228571	0.00970727
158	0.2	0.0628336
159	0.171429	0.197674
160	0.142857	0.580149
161	0.171429	0.197674
162	0.157143	0.356689
163	0.185714	0.0992339
164	0.128571	0.853722
165	0.114286	1
166	0.157143	0.356689
167	0.128571	0.853722
168	0.171429	0.197674
169	0.157143	0.356689
170	0.1	0.714851
171	0.157143	0.356689
172	0.228571	0.00970727
173	0.171429	0.197674
174	0.2	0.0628336
175	0.157143	0.356689
176	0.185714	0.0992339
177	0.142857	0.580149
178	0.171429	0.197674
179	0.1	0.714851
180	0.1	0.714851
181	0.142857	0.580149
182	0.128571	0.853722
183	0.128571	0.853722
184	0.171429	0.197674
185	0.228571	0.00970727
186	0.0714286	0.269022
187	0.142857	0.580149
188	0.142857	0.580149
189	0.128571	0.853722
190	0.171429	0.197674
191	0.185714	0.0992339
192	0.185714	0.0992339
193	0.128571	0.853722
194	0.171429	0.197674
195	0.128571	0.853722
196	0.0571429	0.13831
197	0.185714	0.0992339
198	0.171429	0.197674
199	0.0857143	0.463453
200	0.128571	0.853722
201	0.214286	0.0255549
202	0.157143	0.356689
203	0.128571	0.853722
204	0.185714	0.0992339
205	0.228571	0.00970727
206	0.1	0.714851
207	0.157143	0.356689
208	0.128571	0.853722
209	0.157143	0.356689
210	0.128571	0.853722
211	0.2	0.0628336
212	0.171429	0.197674
213	0.142857	0.580149
214	0.1	0.714851
215	0.128571	0.853722
216	0.157143	0.356689
217	0.128571	0.853722
218	0.0857143	0.463453
219	0.128571	0.853722
220	0.2	0.0628336
221	0.185714	0.0992339
222	0.1	0.714851
223	0.157143	0.356689
224	0.0857143	0.463453
225	0.214286	0.0255549
226	0.157143	0.356689
227	0.185714	0.0992339
228	0.157143	0.356689
229	0.0857143	0.463453
230	0.157143	0.356689
231	0.114286	1
232	0.114286	1
233	0.157143	0.356689
234	0.128571	0.853722
235	0.185714	0.0992339
236	0.142857	0.580149
237	0.157143	0.356689
238	0.157143	0.356689
239	0.171429	0.197674
240	0.0857143	0.463453
241	0.142857	0.580149
242	0.128571	0.853722
243	0.171429	0.197674
244	0.157143	0.356689
245	0.128571	0.853722
246	0.0857143	0.463453
247	0.142857	0.580149
248	0.171429	0.197674
249	0.242857	0.0047663
250	0.228571	0.00970727
251	0.142857	0.580149
252	0.128571	0.853722
253	0.185714	0.0992339
254	0.185714	0.0992339
255	0.2	0.0628336
256	0.128571	0.853722
257	0.228571	0.00970727
258	0.2	0.0628336
259	0.157143	0.356689
260	0.0857143	0.463453
261	0.0857143	0.463453
262	0.157143	0.356689
263	0.228571	0.00970727
264	0.142857	0.580149
265	0.171429	0.197674
266	0.128571	0.853722
267	0.157143	0.356689
268	0.171429	0.197674
269	0.114286	1
270	0.128571	0.853722
271	0.157143	0.356689
272	0.1	0.714851
273	0.157143	0.356689
274	0.157143	0.356689
275	0.114286	1
276	0.214286	0.0255549
277	0.1	0.714851
278	0.128571	0.853722
279	0.128571	0.853722
280	0.128571	0.853722
281	0.128571	0.853722
282	0.142857	0.580149
283	0.0857143	0.463453
284	0.128571	0.853722
285	0.114286	1
286	0.142857	0.580149
287	0.0714286	0.269022
288	0.2	0.0628336
289	0.142857	0.580149
290	0.114286	1
291	0.2	0.0628336
292	0.228571	0.00970727
293	0.128571	0.853722
294	0.128571	0.853722
295	0.114286	1
296	0.171429	0.197674
297	0.228571	0.00970727
298	0.2	0.0628336
299	0.171429	0.197674
300	0.142857	0.580149
301	0.171429	0.197674
302	0.214286	0.0255549
303	0.157143	0.356689
304	0.157143	0.356689
305	0.171429	0.197674
306	0.142857	0.580149
307	0.2	0.0628336
308	0.1	0.714851
309	0.185714	0.0992339
310	0.142857	0.580149
311	0.214286	0.0255549
312	0.214286	0.0255549
313	0.171429	0.197674
314	0.157143	0.356689
315	0.171429	0.197674
316	0.142857	0.580149
317	0.142857	0.580149
318	0.114286	1
319	0.157143	0.356689
320	0.114286	1
321	0.171429	0.197674
322	0.142857	0.580149
323	0.128571	0.853722
324	0.2	0.0628336
325	0.114286	1
326	0.1	0.714851
327	0.0857143	0.463453
328	0.0857143	0.463453
329	0.128571	0.853722
330	0.142857	0.580149
331	0.2	0.0628336
332	0.114286	1
333	0.114286	1
334	0.142857	0.580149
335	0.142857	0.580149
336	0.214286	0.0255549
337	0.114286	1
338	0.128571	0.853722
339	0.2	0.0628336
340	0.2	0.0628336
341	0.128571	0.853722
342	0.142857	0.580149
343	0.157143	0.356689
344	0.1	0.714851
345	0.214286	0.0255549
346	0.214286	0.0255549
347	0.185714	0.0992339
348	0.142857	0.580149
349	0.142857	0.580149
350	0.1	0.714851
351	0.228571	0.00970727
352	0.171429	0.197674
353	0.0857143	0.463453
354	0.128571	0.853722
355	0.185714	0.0992339
356	0.142857	0.580149
357	0.128571	0.853722
358	0.114286	1
359	0.142857	0.580149
360	0.171429	0.197674
361	0.2	0.0628336
362	0.142857	0.580149
363	0.157143	0.356689
364	0.128571	0.853722
365	0.2	0.0628336
366	0.2	0.0628336
367	0.114286	1
368	0.214286	0.0255549
369	0.142857	0.580149
370	0.114286	1
371	0.142857	0.580149
372	0.142857	0.580149
373	0.128571	0.853722
374	0.214286	0.0255549
375	0.2	0.0628336
376	0.114286	1
377	0.128571	0.853722
378	0.171429	0.197674
379	0.142857	0.580149
380	0.128571	0.853722
381	0.128571	0.853722
382	0.1	0.714851
383	0.1	0.714851
384	0.0857143	0.463453
385	0.128571	0.853722
386	0.214286	0.0255549
387	0.1	0.714851
388	0.2	0.0628336
389	0.185714	0.0992339
390	0.2	0.0628336
391	0.0714286	0.269022
392	0.114286	1
393	0.171429	0.197674
394	0.114286	1
395	0.142857	0.580149
396	0.157143	0.356689
397	0.114286	1
398	0.157143	0.356689
399	0.142857	0.580149
400	0.157143	0.356689
401	0.0714286	0.269022
402	0.157143	0.356689
403	0.171429	0.197674
404	0.142857	0.580149
405	0.128571	0.853722
406	0.185714	0.0992339
407	0.185714	0.0992339
408	0.171429	0.197674
409	0.114286	1
410	0.142857	0.580149
411	0.157143	0.356689
412	0.114286	1
413	0.171429	0.197674
414	0.0571429	0.13831
415	0.142857	0.580149
416	0.142857	0.580149
417	0.128571	0.853722
418	0.171429	0.197674
419	0.214286	0.0255549
420	0.142857	0.580149
421	0.214286	0.0255549
422	0.157143	0.356689
423	0.128571	0.853722
424	0.128571	0.853722
425	0.128571	0.853722
426	0.128571	0.853722
427	0.0714286	0.269022
428	0.185714	0.0992339
429	0.171429	0.197674
430	0.128571	0.853722
431	0.142857	0.580149
432	0.114286	1
433	0.0857143	0.463453
434	0.157143	0.356689
435	0.142857	0.580149
436	0.114286	1
437	0.185714	0.0992339
438	0.171429	0.197674
439	0.128571	0.853722
440	0.0857143	0.463453
441	0.2	0.0628336
442	0.157143	0.356689
443	0.185714	0.0992339
444	0.2	0.0628336
445	0.142857	0.580149
446	0.142857	0.580149
447	0.142857	0.580149
448	0.2	0.0628336
449	0.185714	0.0992339
450	0.171429	0.197674
451	0.214286	0.0255549
452	0.0857143	0.463453
453	0.114286	1
454	0.128571	0.853722
455	0.142857	0.580149
456	0.214286	0.0255549
457	0.114286	1
458	0.142857	0.580149
459	0.171429	0.197674
460	0.2	0.0628336
461	0.114286	1
462	0.142857	0.580149
463	0.171429	0.197674
464	0.2	0.0628336
465	0.128571	0.853722
466	0.128571	0.853722
467	0.185714	0.0992339
468	0.214286	0.0255549
469	0.185714	0.0992339
470	0.157143	0.356689
471	0.142857	0.580149
472	0.228571	0.00970727
473	0.2	0.0628336
474	0.0857143	0.463453
475	0.157143	0.356689
476	0.128571	0.853722
477	0.128571	0.853722
478	0.128571	0.853722
479	0.2	0.0628336
480	0.142857	0.580149
481	0.114286	1
482	0.157143	0.356689
483	0.0857143	0.463453
484	0.128571	0.853722
485	0.214286	0.0255549
486	0.142857	0.580149
487	0.128571	0.853722
488	0.142857	0.580149
489	0.128571	0.853722
490	0.2	0.0628336
491	0.142857	0.580149
492	0.128571	0.853722
493	0.114286	1
494	0.142857	0.580149
495	0.171429	0.197674
496	0.2	0.0628336
497	0.142857	0.580149
498	0.185714	0.0992339
499	0.128571	0.853722
500	0.142857	0.580149
501	0.171429	0.197674
502	0.0857143	0.463453
503	0.171429	0.197674
504	0.1	0.714851
505	0.128571	0.853722
506	0.185714	0.0992339
507	0.0857143	0.463453
508	0.128571	0.853722
509	0.171429	0.197674
510	0.185714	0.0992339
511	0.128571	0.853722
512	0.2	0.0628336
513	0.157143	0.356689
514	0.128571	0.853722
515	0.1	0.714851
516	0.157143	0.356689
517	0.228571	0.00970727
518	0.114286	1
519	0.1	0.714851
520	0.157143	0.356689
521	0.157143	0.356689
522	0.114286	1
523	0.128571	0.853722
524	0.142857	0.580149
525	0.114286	1
526	0.114286	1
527	0.142857	0.580149
528	0.128571	0.853722
529	0.185714	0.0992339
530	0.128571	0.853722
531	0.185714	0.0992339
532	0.1	0.714851
533	0.0714286	0.269022
534	0.114286	1
535	0.157143	0.356689
536	0.157143	0.356689
537	0.128571	0.853722
538	0.0714286	0.269022
539	0.128571	0.853722
540	0.128571	0.853722
541	0.157143	0.356689
542	0.2	0.0628336
543	0.128571	0.853722
544	0.157143	0.356689
545	0.257143	0.00148295
546	0.214286	0.0255549
547	0.1	0.714851
548	0.0857143	0.463453
549	0.185714	0.0992339
550	0.228571	0.00970727
551	0.114286	1
552	0.142857	0.580149
553	0.157143	0.356689
554	0.0714286	0.269022
555	0.214286	0.0255549
556	0.142857	0.580149
557	0.171429	0.197674
558	0.0857143	0.463453
559	0.185714	0.0992339
560	0.142857	0.580149
561	0.171429	0.197674
562	0.2	0.0628336
563	0.114286	1
564	0.128571	0.853722
565	0.171429	0.197674
566	0.142857	0.580149
567	0.157143	0.356689
568	0.114286	1
569	0.114286	1
570	0.157143	0.356689
571	0.228571	0.00970727
572	0.142857	0.580149
573	0.128571	0.853722
574	0.1	0.714851
575	0.157143	0.356689
576	0.142857	0.580149
577	0.214286	0.0255549
578	0.114286	1
579	0.185714	0.0992339
580	0.2	0.0628336
581	0.214286	0.0255549
582	0.228571	0.00970727
583	0.128571	0.853722
584	0.157143	0.356689
585	0.171429	0.197674
586	0.114286	1
587	0.128571	0.853722
588	0.128571	0.853722
589	0.1	0.714851
590	0.114286	1
591	0.1	0.714851
592	0.171429	0.197674
593	0.1	0.714851
594	0.1	0.714851
595	0.242857	0.0047663
596	0.171429	0.197674
597	0.128571	0.853722
598	0.142857	0.580149
599	0.142857	0.580149
600	0.0571429	0.13831
601	0.157143	0.356689
602	0.214286	0.0255549
603	0.171429	0.197674
604	0.142857	0.580149
605	0.171429	0.197674
606	0.114286	1
607	0.171429	0.197674
608	0.128571	0.853722
609	0.185714	0.0992339
610	0.157143	0.356689
611	0.185714	0.0992339
612	0.171429	0.197674
613	0.114286	1
614	0.0571429	0.13831
615	0.128571	0.853722
616	0.1	0.714851
617	0.142857	0.580149
618	0.157143	0.356689
619	0.171429	0.197674
620	0.171429	0.197674
621	0.157143	0.356689
622	0.114286	1
623	0.1	0.714851
624	0.185714	0.0992339
625	0.214286	0.0255549
626	0.0857143	0.463453
627	0.114286	1
628	0.157143	0.356689
629	0.214286	0.0255549
630	0.157143	0.356689
631	0.171429	0.197674
632	0.114286	1
633	0.157143	0.356689
634	0.114286	1
635	0.114286	1
636	0.114286	1
637	0.171429	0.197674
638	0.114286	1
639	0.142857	0.580149
640	0.171429	0.197674
641	0.142857	0.580149
642	0.171429	0.197674
643	0.1	0.714851
644	0.2	0.0628336
645	0.171429	0.197674
646	0.214286	0.0255549
647	0.1	0.714851
648	0.128571	0.853722
649	0.185714	0.0992339
650	0.1	0.714851
651	0.2	0.0628336
652	0.1	0.714851
653	0.128571	0.853722
654	0.171429	0.197674
655	0.0714286	0.269022
656	0.114286	1
657	0.114286	1
658	0.128571	0.853722
659	0.2	0.0628336
660	0.128571	0.853722
661	0.128571	0.853722
662	0.0714286	0.269022
663	0.114286	1
664	0.228571	0.00970727
665	0.128571	0.853722
666	0.228571	0.00970727
667	0.0714286	0.269022
668	0.2	0.0628336
669	0.128571	0.853722
670	0.157143	0.356689
671	0.171429	0.197674
672	0.171429	0.197674
673	0.2	0.0628336
674	0.185714	0.0992339
675	0.2	0.0628336
676	0.157143	0.356689
677	0.142857	0.580149
678	0.114286	1
679	0.2	0.0628336
680	0.157143	0.356689
681	0.128571	0.853722
682	0.114286	1
683	0.128571	0.853722
684	0.114286	1
685	0.2	0.0628336
686	0.157143	0.356689
687	0.185714	0.0992339
688	0.0857143	0.463453
689	0.157143	0.356689
690	0.2	0.0628336
691	0.214286	0.0255549
692	0.114286	1
693	0.114286	1
694	0.128571	0.853722
695	0.114286	1
696	0.214286	0.0255549
697	0.114286	1
698	0.128571	0.853722
699	0.185714	0.0992339
700	0.157143	0.356689
701	0.242857	0.0047663
702	0.128571	0.853722
703	0.2	0.0628336
704	0.114286	1
705	0.157143	0.356689
706	0.185714	0.0992339
707	0.114286	1
708	0.157143	0.356689
709	0.114286	1
710	0.142857	0.580149
711	0.185714	0.0992339
712	0.185714	0.0992339
713	0.128571	0.853722
714	0.171429	0.197674
715	0.157143	0.356689
716	0.1	0.714851
717	0.171429	0.197674
718	0.114286	1
719	0.128571	0.853722
720	0.185714	0.0992339
721	0.171429	0.197674
722	0.0857143	0.463453
723	0.128571	0.853722
724	0.157143	0.356689
725	0.1	0.714851
726	0.142857	0.580149
727	0.171429	0.197674
728	0.157143	0.356689
729	0.185714	0.0992339
730	0.214286	0.0255549
731	0.142857	0.580149
732	0.142857	0.580149
733	0.142857	0.580149
734	0.128571	0.853722
735	0.171429	0.197674
736	0.228571	0.00970727
737	0.128571	0.853722
738	0.128571	0.853722
739	0.185714	0.0992339
740	0.157143	0.356689
741	0.157143	0.356689
742	0.128571	0.853722
743	0.242857	0.0047663
744	0.185714	0.0992339
745	0.2	0.0628336
746	0.0714286	0.269022
747	0.128571	0.853722
748	0.114286	1
749	0.157143	0.356689
750	0.142857	0.580149
751	0.128571	0.853722
752	0.228571	0.00970727
753	0.157143	0.356689
754	0.128571	0.853722
755	0.185714	0.0992339
756	0.0857143	0.463453
757	0.157143	0.356689
758	0.185714	0.0992339
759	0.128571	0.853722
760	0.114286	1
761	0.142857	0.580149
762	0.214286	0.0255549
763	0.185714	0.0992339
764	0.114286	1
765	0.157143	0.356689
766	0.114286	1
767	0.0857143	0.463453
768	0.128571	0.853722
769	0.157143	0.356689
770	0.142857	0.580149
771	0.0857143	0.463453
772	0.2	0.0628336
773	0.2	0.0628336
774	0.171429	0.197674
775	0.142857	0.580149
776	0.128571	0.853722
777	0.214286	0.0255549
778	0.128571	0.853722
779	0.0857143	0.463453
780	0.257143	0.00148295
781	0.114286	1
782	0.157143	0.356689
783	0.157143	0.356689
784	0.171429	0.197674
785	0.157143	0.356689
786	0.171429	0.197674
787	0.171429	0.197674
788	0.114286	1
789	0.142857	0.580149
790	0.157143	0.356689
791	0.1	0.714851
792	0.228571	0.00970727
793	0.128571	0.853722
794	0.1	0.714851
795	0.2	0.0628336
796	0.157143	0.356689
797	0.185714	0.0992339
798	0.0857143	0.463453
799	0.128571	0.853722
800	0.128571	0.853722
801	0.157143	0.356689
802	0.214286	0.0255549
803	0.128571	0.853722
804	0.1	0.714851
805	0.171429	0.197674
806	0.171429	0.197674
807	0.1	0.714851
808	0.2	0.0628336
809	0.2	0.0628336
810	0.142857	0.580149
811	0.114286	1
812	0.185714	0.0992339
813	0.2	0.0628336
814	0.2	0.0628336
815	0.171429	0.197674
816	0.142857	0.580149
817	0.157143	0.356689
818	0.2	0.0628336
819	0.157143	0.356689
820	0.171429	0.197674
821	0.1	0.714851
822	0.157143	0.356689
823	0.157143	0.356689
824	0.157143	0.356689
825	0.114286	1
826	0.157143	0.356689
827	0.1	0.714851
828	0.185714	0.0992339
829	0.157143	0.356689
830	0.0714286	0.269022
831	0.157143	0.356689
832	0.128571	0.853722
833	0.142857	0.580149
834	0.214286	0.0255549
835	0.128571	0.853722
836	0.114286	1
837	0.1	0.714851
838	0.1	0.714851
839	0.171429	0.197674
840	0.157143	0.356689
841	0.0857143	0.463453
842	0.157143	0.356689
843	0.1	0.714851
844	0.2	0.0628336
845	0.114286	1
846	0.185714	0.0992339
847	0.142857	0.580149
848	0.128571	0.853722
849	0.171429	0.197674
850	0.171429	0.197674
851	0.1	0.714851
852	0.128571	0.853722
853	0.157143	0.356689
854	0.171429	0.197674
855	0.171429	0.197674
856	0.142857	0.580149
857	0.257143	0.00148295
858	0.114286	1
859	0.2	0.0628336
860	0.157143	0.356689
861	0.1	0.714851
862	0.114286	1
863	0.0857143	0.463453
864	0.185714	0.0992339
865	0.114286	1
866	0.142857	0.580149
867	0.142857	0.580149
868	0.228571	0.00970727
869	0.2	0.0628336
870	0.185714	0.0992339
871	0.1	0.714851
872	0.214286	0.0255549
873	0.114286	1
874	0.114286	1
875	0.185714	0.0992339
876	0.171429	0.197674
877	0.142857	0.580149
878	0.128571	0.853722
879	0.1	0.714851
880	0.157143	0.356689
881	0.2	0.0628336
882	0.185714	0.0992339
883	0.114286	1
884	0.1	0.714851
885	0.171429	0.197674
886	0.1	0.714851
887	0.142857	0.580149
888	0.114286	1
889	0.114286	1
890	0.214286	0.0255549
891	0.157143	0.356689
892	0.157143	0.356689
893	0.0857143	0.463453
894	0.142857	0.580149
895	0.185714	0.0992339
896	0.2	0.0628336
897	0.114286	1
898	0.142857	0.580149
899	0.128571	0.853722
900	0.0857143	0.463453
901	0.214286	0.0255549
902	0.2	0.0628336
903	0.2	0.0628336
904	0.142857	0.580149
905	0.128571	0.853722
906	0.142857	0.580149
907	0.142857	0.580149
908	0.1	0.714851
909	0.157143	0.356689
910	0.142857	0.580149
911	0.2	0.0628336
912	0.185714	0.0992339
913	0.171429	0.197674
914	0.142857	0.580149
915	0.214286	0.0255549
916	0.0428571	0.0424476
917	0.1	0.714851
918	0.185714	0.0992339
919	0.0857143	0.463453
920	0.128571	0.853722
921	0.157143	0.356689
922	0.0857143	0.463453
923	0.214286	0.0255549
924	0.171429	0.197674
925	0.128571	0.853722
926	0.157143	0.356689
927	0.142857	0.580149
928	0.128571	0.853722
929	0.157143	0.356689
930	0.1	0.714851
931	0.185714	0.0992339
932	0.185714	0.0992339
933	0.142857	0.580149
934	0.142857	0.580149
935	0.128571	0.853722
936	0.171429	0.197674
937	0.114286	1
938	0.2	0.0628336
939	0.0857143	0.463453
940	0.171429	0.197674
941	0.142857	0.580149
942	0.128571	0.853722
943	0.214286	0.0255549
944	0.128571	0.853722
945	0.114286	1
946	0.1	0.714851
947	0.142857	0.580149
948	0.157143	0.356689
949	0.157143	0.356689
950	0.128571	0.853722
951	0.171429	0.197674
952	0.171429	0.197674
953	0.128571	0.853722
954	0.171429	0.197674
955	0.128571	0.853722
956	0.171429	0.197674
957	0.185714	0.0992339
958	0.114286	1
959	0.157143	0.356689
960	0.171429	0.197674
961	0.128571	0.853722
962	0.157143	0.356689
963	0.128571	0.853722
964	0.185714	0.0992339
965	0.114286	1
966	0.142857	0.580149
967	0.142857	0.580149
968	0.157143	0.356689
969	0.114286	1
970	0.171429	0.197674
971	0.142857	0.580149
972	0.0857143	0.463453
973	0.128571	0.853722
974	0.114286	1
975	0.114286	1
976	0.2	0.0628336
977	0.128571	0.853722
978	0.1	0.714851
979	0.114286	1
980	0.157143	0.356689
981	0.114286	1
982	0.185714	0.0992339
983	0.171429	0.197674
984	0.185714	0.0992339
985	0.114286	1
986	0.2	0.0628336
987	0.171429	0.197674
988	0.171429	0.197674
989	0.185714	0.0992339
990	0.142857	0.580149
991	0.157143	0.356689
992	0.228571	0.00970727
993	0.128571	0.853722
994	0.114286	1
995	0.1	0.714851
996	0.114286	1
997	0.142857	0.580149
998	0.142857	0.580149
999	0.0857143	0.463453
1000	0.171429	0.197674
