# Supplementary material for: An automated feeding system for the African killifish reveals the impact of diet on lifespan and allows scalable assessment of associative learning
Source: eLife. 2022 Nov 10;11:e69008. doi: 10.7554/eLife.69008 (PMC9788828; doi:10.7554/eLife.69008)
Supplement: Figure 6—source data 1. [file elife-69008-fig6-data1.xlsx]

## Sheet: Behavior AnimalInfo
fish	age	Sex	AgeCat	DOB	StartedTraining	EndedTraining	AgeBeginTraining_days	AgeDeath_days	TminusAgeBeginTraining	FoodDrop (1 = dropped; 0 = no)	RedLight (1 = turned on; 0 = not)	Excluded (1 = excluded; 0 = included)	Notes for exclusion
1	47	female	young	2018-02-08	2018-03-27	2018-04-04	47	266	219	1	1	0
2	130	male	old	2017-11-17	2018-03-27	2018-04-04	130	194	64	1	1	0
3	47	male	young	2018-02-08	2018-03-27	2018-04-04	47	185	138	1	1	0
4	130	male	old	2017-11-17	2018-03-27	2018-04-04	130	150	20	1	1	0
5	47	male	young	2018-02-08	2018-03-27	2018-04-04	47	NA	NA	1	1	0
6	131	male	old	2017-11-16	2018-03-27	2018-04-04	131	222	91	1	1	1	Fish did not display eating behavior
7	112	female	old	2017-12-14	2018-04-05	2018-04-10	112	123	11	0	1	1	Can't validate food drop
8	112	male	old	2017-12-14	2018-04-05	2018-04-10	112	182	70	0	1	1	Can't validate food drop
9	112	female	old	2017-12-14	2018-04-05	2018-04-10	112	NA	NA	1	1	0
10	112	male	old	2017-12-14	2018-04-05	2018-04-10	112	NA	NA	0	1	1	Can't validate food drop
11	112	female	old	2017-12-14	2018-04-05	2018-04-10	112	221	109	0	1	1	Can't validate food drop
12	80	male	middle	2018-01-15	2018-04-05	2018-04-10	80	124	44	0	0	1	Can't validate food drop
13	69	male	young	2018-02-01	2018-04-11	2018-04-13	69	80	11	1	1	0
14	69	male	young	2018-02-01	2018-04-11	2018-04-13	69	183	114	1	1	0
15	119	male	old	2017-12-13	2018-04-11	2018-04-13	119	NA	NA	1	1	0
16	119	male	old	2017-12-13	2018-04-11	2018-04-13	119	152	33	1	1	0
17	89	male	middle	2018-01-15	2018-04-14	2018-04-17	89	158	69	1	1	1	Fish did not display eating behavior
18	89	male	middle	2018-01-15	2018-04-14	2018-04-17	89	NA	NA	0	0	1	Light appears to no longer turn on partway through, removed
19	122	female	old	2017-12-13	2018-04-14	2018-04-17	122	279	157	1	1	0
20	122	female	old	2017-12-13	2018-04-14	2018-04-17	122	132	10	1	1	0
21	36	female	young	2018-03-13	2018-04-18	2018-04-19	36	63	27	1	1	1	Only 12 recorded videos, removed
22	36	female	young	2018-03-13	2018-04-18	2018-04-19	36	184	148	1	1	1	Only 12 recorded videos, removed
23	36	female	young	2018-03-13	2018-04-18	2018-04-19	36	177	141	1	1	1	Only 4 recorded videos, removed
24	36	female	young	2018-03-13	2018-04-18	2018-04-19	36	198	162	1	1	1	Only 12 recorded videos, removed
25	127	male	old	2017-12-14	2018-04-20	2018-04-24	127	255	128	1	1	1	Can't validate food drop
26	127	male	old	2017-12-14	2018-04-20	2018-04-24	127	318	191	1	1	0
27	123	male	old	2017-12-18	2018-04-20	2018-04-24	123	135		0	1	1	Spinning, removed
