# Supplementary material for: An automated feeding system for the African killifish reveals the impact of diet on lifespan and allows scalable assessment of associative learning
Source: eLife. 2022 Nov 10;11:e69008. doi: 10.7554/eLife.69008 (PMC9788828; doi:10.7554/eLife.69008)
Supplement: Figure 6—source data 4. [file elife-69008-fig6-data4.xlsx]

## Sheet: Enrolled_auto_t1s_17trials
trial #	Fish_1	Fish_2	Fish_3	Fish_4	Fish_5	Fish_9	Fish_13	Fish_14	Fish_15	Fish_16	Fish_19	Fish_20	Fish_26
1	18	13.2	9.25	15.55	18	0	18	18	18	18	18	18	18
2	18	18	11.35	18	13.55	18	18	10.1	18	0	18	18	18
3	16.85	6.7	10.75	15.75	18	5.55	18	7.1	18	5.3	14.85	18	18
4	18	18	7.8	18	18	9.95	18	3.25	18	13.15	10.75	18	18
5	10.65	3.2	4.35	3.25	0	3.4	18	0.45	4.25	11	10.1	0.8	18
6	0	0	1.95	5.6	17.75	4.95	18	7.25	11.65	11	11.6	18	6.15
7	2.4	1.35	5.4	18	9.6	1.6	*	*	18	18	18	7.4	6.55
8	1.85	7.85	3.8	3.75	2.1	18	18	18	18	18	18	1.2	14.6
9	0	4.3	0	3.5	17.35	3.4	9.75	3.2	10.35	4	15.4	16.75	17.5
10	0.45	0	2.3	4.35	1.3	3.15	1.9	1.3	10.55	2.8	13.75	2.15	8.7
11	16.6	18	5.85	18	10.95	2.75	7.35	2.55	13.3	13.75	11.95	0.45	18
12	8	1.7	6.5	18	2	0.45	15.75	0	18	10.85	4.35	2.5	11
13	8	1.8	0.45	18	4.4	1.6	13.3	2.2	16.65	4.8	6	1.25	0.55
14	1.1	1.65	1.35	2.1	18	1.5	4.65	9.6	14.6	10.85	18	18	10.6
15	3.1	1.95	12.8	1.55	0.45	8.5	18	18	0.45	18	18	18	6.75
16	11.95	13.75	0.7	4.8	2.35	1.55	5.4	5.4	13.85	18	0.95	1.7	8.3
17	2.3	1.55	2.7	3.05	6.3	18	0.45	1.8	14.65	6	11.25	18	9.9
Velocity Threshold	75	75	100	75	60	60	100	45	100	75	75	60	80
Surface Threshold	150	100	100	100	100	100	100	150	100	100	100	100	100
Food Drop Likelihood Threshold	0.9	0.01	0.9	0.9	0.9	0.9	0.9	0.03	0.9	0.9	0.9	0.9	0.9
First 7 trials_average_t1 (sec)	11.9857	8.63571	7.26429	13.45	13.5571	6.20714	18	7.69167	15.1286	10.9214	14.4714	14.0286	14.6714
Last 7 trials_average_t1 (sec)	7.29286	5.77143	4.33571	9.35714	6.35	4.90714	9.27143	5.65	13.0714	11.75	10.0714	8.55714	9.3
Overall average t1 (sec)	8.07353	6.64706	5.13529	10.0735	9.41765	6.02059	12.6594	6.7625	13.9	10.7941	12.8794	10.4824	12.2706

## Sheet: t1_Calculation_Notes
	Fish_1	Fish_2	Fish_3	Fish_4	Fish_5	Fish_9	Fish_13	Fish_14	Fish_15	Fish_16	Fish_19	Fish_20	Fish_26
Notes	NA set by manual inspection of heatmaps	NA set by manual inspection of heatmaps	NA set by manual inspection of heatmaps	NA set by manual inspection of heatmaps	NA set by manual inspection of heatmaps	NA set by manual inspection of heatmaps	NA set by manual inspection of heatmaps	NA set by manual inspection of heatmaps	NA set by manual inspection of heatmaps	NA set by manual inspection of heatmaps	NA set by manual inspection of heatmaps	NA set by manual inspection of heatmaps	NA set by manual inspection of heatmaps
			Trial 4 - initially called as "NA"; Animal gets to surface, but does not meet velocity cutoff so vel indices not picking it up; manual inspection of velocity dataframe shows animal getting closer, but slowly for first upward velocity value; selected an index with + velocity preceding that showed progress			Trial 3 - fish arrives at surface at 10.40secs but does not meet velocity cutoff; manually set to 5.55 based on inspection of velocity dataframe, preceding veloicty burst although below cutoff				Trial 11 - initially called as "NA"; Animal gets to surface at 15.1sec, but does not meet velocity cutoff so vel indices not picking it up, manually set to 13.75 which is the beginning of a lower velocity burst

## Sheet: Rounded_auto_t1s_17trials
trial #	Fish_1	Fish_2	Fish_3	Fish_4	Fish_5	Fish_9	Fish_13	Fish_14	Fish_15	Fish_16	Fish_19	Fish_20	Fish_26
1	18	13	9	16	18	0	18	18	18	18	18	18	18
2	18	18	11	18	14	18	18	10	18	0	18	18	18
3	17	7	11	16	18	6	18	7	18	5	15	18	18
4	18	18	8	18	18	10	18	3	18	13	11	18	18
5	11	3	4	3	0	3	18	0	4	11	10	1	18
6	0	0	2	6	18	5	18	7	12	11	12	18	6
7	2	1	5	18	10	2	*	*	18	18	18	7	7
8	2	8	4	4	2	18	18	18	18	18	18	1	15
9	0	4	0	4	17	3	10	3	10	4	15	17	18
10	0	0	2	4	1	3	2	1	11	3	14	2	9
11	17	18	6	18	11	3	7	3	13	14	12	0	18
12	8	2	7	18	2	0	16	0	18	11	4	3	11
13	8	2	0	18	4	2	13	2	17	5	6	1	1
14	1	2	1	2	18	2	5	10	15	11	18	18	11
15	3	2	13	2	0	9	18	18	0	18	18	18	7
16	12	14	1	5	2	2	5	5	14	18	1	2	8
17	2	2	3	3	6	18	0	2	15	6	11	18	10
First 7 trials_number_Successes	1	2	5	2	0	4	0	3	1	1	0	1	2
Last 7 trials_number_Successes	4	5	3	4	4	5	3	4	0	2	2	2	2
Trial_to_Learn	7	8	4	5	12	5	10	3	0	9	12	0	6

## Sheet: Summary_17trials
Fish	Age (days post hatching)	Sex	First 7 trials_average_t1 (sec)	Last 7 trials_average_t1 (sec)	Difference_First 7_Last 7 trials_average_t1 (sec)	First 7 trials_number_Successes	Last 7 trials_number_Successes	First 7 trials_Percent_Successes	Last 7 trials_Percent_Successes	Difference_First 7_Last 7 trials_Percent_Successes	Trial_to_Learn	Learning Index_2	Sold or Open	Shape	Symbol
Fish_3	47	Male	7.26429	4.33571	-2.92857	5	3	0.714286	0.428571	-0.285714	4	0.25	solid	circle	solid circle
Fish_5	47	Male	13.5571	6.35	-7.20714	0	4	0	0.571429	0.571429	12	0.0833333	solid	triangle	solid triangle
Fish_13	69	Male	18	9.27143	-8.72857	0	3	0	0.428571	0.428571	10	0.1	solid	diamond	solid diamond
Fish_14	69	Male	7.69167	5.65	-2.04167	3	4	0.428571	0.571429	0.142857	3	0.333333	solid	square	solid square
Fish_15	119	Male	15.1286	13.0714	-2.05714	1	0	0.142857	0	-0.142857	0	0	solid	star	solid star
Fish_16	119	Male	10.9214	11.75	0.828571	1	2	0.142857	0.285714	0.142857	9	0.111111	solid	arrowhead	solid arrowhead
Fish_26	127	Male	14.6714	9.3	-5.37143	2	2	0.285714	0.285714	0	6	0.166667	solid	hexagon	solid hexagon
Fish_2	130	Male	8.63571	5.77143	-2.86429	2	5	0.285714	0.714286	0.428571	8	0.125	solid	oval	solid oval
Fish_4	130	Male	13.45	9.35714	-4.09286	2	4	0.285714	0.571429	0.285714	5	0.2	solid	rectangle	solid rectangle
Fish_1	47	Female	11.9857	7.29286	-4.69286	1	4	0.142857	0.571429	0.428571	7	0.142857	open	circle	open circle
Fish_9	112	Female	6.20714	4.90714	-1.3	4	5	0.571429	0.714286	0.142857	5	0.2	open	triangle	open triangle
Fish_19	122	Female	14.4714	10.0714	-4.4	0	2	0	0.285714	0.285714	12	0.0833333	open	diamond	open diamond
Fish_20	122	Female	14.0286	8.55714	-5.47143	1	2	0.142857	0.285714	0.142857	0	0	open	square	open square

## Sheet: Auto Avg Velocity
	Age (days post hatching)	Sex	Average Velocity (pixels/sec)
Fish_3	47	Male	6.77532
Fish_5	47	Male	6.98171
Fish_13	69	Male	7.17612
Fish_14	69	Male	6.18189
Fish_15	119	Male	7.46821
Fish_16	119	Male	6.32666
Fish_26	127	Male	6.53269
Fish_2	130	Male	6.54888
Fish_4	130	Male	7.11273
Fish_1	47	Female	6.60205
Fish_9	112	Female	6.81768
Fish_19	122	Female	6.7027
Fish_20	122	Female	6.06125

## Sheet: t1_Auto_vs_Manual
Animal	trial #	all auto t1s	all manual t1s	difference (manual vs auto)	Notes
Fish_15	3	18	0	18
Fish_5	5	0	18	18
Fish_5	14	18	0	18	discrepancy between auto and manual- fish at surface, but is facing away from the food
Fish_20	8	1.2	18	16.8	surface threshold set too high
Fish_20	17	18	2	16	manual quantification does not have velocity cutoff, and surface threshold set too high
Fish_4	12	18	2	16	discrepancy between auto and manual- fish at surface, but is facing away from the food
Fish_9	17	18	2	16
Fish_15	11	13.3	0	13.3	discrepancy between auto and manual- fish at surface, but is facing away from the food
Fish_3	15	12.8	0	12.8	fish at the surface in the back of the tank, auto did not call at surface
Fish_19	10	13.75	1	12.75	discrepancy between auto and manual- fish at surface, but is facing away from the food
Fish_16	3	5.3	18	12.7	fish at the surface in the back of the tank, manual could have called t1=3sec; surface threshold too high
Fish_1	16	11.95	0	11.95
Fish_15	16	13.85	2	11.85
Fish_19	17	11.25	0	11.25
Fish_16	6	11	0	11
Fish_19	4	10.75	0	10.75
Fish_16	4	13.15	3	10.15
Fish_19	11	11.95	2	9.95
Fish_26	9	17.5	8	9.5
Fish_26	17	9.9	1	8.9
Fish_19	6	11.6	3	8.6
Fish_1	12	8	0	8
Fish_1	13	8	0	8
Fish_5	11	10.95	3	7.95
Fish_16	13	4.8	12	7.2
Fish_14	2	10.1	3	7.1
Fish_9	4	9.95	3	6.95
Fish_20	9	16.75	10	6.75
Fish_5	6	17.75	11	6.75
Fish_5	2	13.55	7	6.55
Fish_20	11	0.45	7	6.55
Fish_19	13	6	0	6
Fish_1	5	10.65	5	5.65
Fish_5	9	17.35	12	5.35
Fish_2	8	7.85	3	4.85
Fish_16	11	13.75	9	4.75
Fish_4	5	3.25	8	4.75
Fish_3	2	11.35	16	4.65
Fish_26	8	14.6	10	4.6
Fish_9	3	5.55	1	4.55
Fish_5	13	4.4	0	4.4
Fish_26	6	6.15	2	4.15
Fish_3	11	5.85	2	3.85
Fish_15	13	16.65	13	3.65
Fish_4	6	5.6	2	3.6
Fish_4	1	15.55	12	3.55
Fish_13	17	0.45	4	3.55
Fish_9	15	8.5	5	3.5
Fish_26	7	6.55	10	3.45
Fish_14	16	5.4	2	3.4
Fish_19	9	15.4	12	3.4
Fish_19	12	4.35	1	3.35
Fish_14	9	3.2	0	3.2
Fish_14	3	7.1	4	3.1
Fish_9	6	4.95	2	2.95
Fish_26	15	6.75	4	2.75
Fish_4	8	3.75	1	2.75
Fish_13	11	7.35	10	2.65
Fish_5	7	9.6	7	2.6
Fish_15	10	10.55	8	2.55
Fish_13	16	5.4	3	2.4
Fish_3	7	5.4	3	2.4
Fish_2	9	4.3	2	2.3
Fish_15	5	4.25	2	2.25
Fish_2	5	3.2	1	2.2
Fish_2	1	13.2	11	2.2
Fish_9	10	3.15	1	2.15
Fish_5	8	2.1	0	2.1
Fish_19	5	10.1	8	2.1
Fish_1	6	0	2	2
Fish_26	12	11	9	2
Fish_5	12	2	0	2
Fish_19	3	14.85	13	1.85
Fish_14	17	1.8	0	1.8
Fish_16	10	2.8	1	1.8
Fish_3	4	7.8	6	1.8
Fish_3	8	3.8	2	1.8
Fish_26	10	8.7	7	1.7
Fish_13	14	4.65	3	1.65
Fish_15	17	14.65	13	1.65
Fish_4	10	4.35	6	1.65
Fish_26	14	10.6	9	1.6
Fish_4	9	3.5	2	1.5
Fish_20	7	7.4	6	1.4
Fish_9	9	3.4	2	1.4
Fish_1	11	16.6	18	1.4
Fish_5	16	2.35	1	1.35
Fish_14	10	1.3	0	1.3
Fish_3	10	2.3	1	1.3
Fish_20	13	1.25	0	1.25
Fish_3	1	9.25	8	1.25
Fish_16	14	10.85	12	1.15
Fish_20	10	2.15	1	1.15
Fish_1	3	16.85	18	1.15
Fish_13	10	1.9	3	1.1
Fish_4	17	3.05	2	1.05
Fish_16	9	4	5	1
Fish_16	17	6	7	1
Fish_1	14	1.1	2	0.9
Fish_4	14	2.1	3	0.9
Fish_20	5	0.8	0	0.8
Fish_14	13	2.2	3	0.8
Fish_4	16	4.8	4	0.8
Fish_14	4	3.25	4	0.75
Fish_14	6	7.25	8	0.75
Fish_4	3	15.75	15	0.75
Fish_9	11	2.75	2	0.75
Fish_20	16	1.7	1	0.7
Fish_5	10	1.3	2	0.7
Fish_15	6	11.65	11	0.65
Fish_15	9	10.35	11	0.65
Fish_3	5	4.35	5	0.65
Fish_2	7	1.35	2	0.65
Fish_3	14	1.35	2	0.65
Fish_14	14	9.6	9	0.6
Fish_26	13	0.55	0	0.55
Fish_14	11	2.55	2	0.55
Fish_20	12	2.5	2	0.5
Fish_3	12	6.5	7	0.5
Fish_9	14	1.5	2	0.5
Fish_1	10	0.45	0	0.45
Fish_14	5	0.45	0	0.45
Fish_15	15	0.45	0	0.45
Fish_3	13	0.45	0	0.45
Fish_5	15	0.45	0	0.45
Fish_9	12	0.45	0	0.45
Fish_2	17	1.55	2	0.45
Fish_4	15	1.55	2	0.45
Fish_9	16	1.55	2	0.45
Fish_15	14	14.6	15	0.4
Fish_1	7	2.4	2	0.4
Fish_9	5	3.4	3	0.4
Fish_9	7	1.6	2	0.4
Fish_9	13	1.6	2	0.4
Fish_2	14	1.65	2	0.35
Fish_13	13	13.3	13	0.3
Fish_26	16	8.3	8	0.3
Fish_2	12	1.7	2	0.3
Fish_3	16	0.7	1	0.3
Fish_1	17	2.3	2	0.3
Fish_2	3	6.7	7	0.3
Fish_3	17	2.7	3	0.3
Fish_5	17	6.3	6	0.3
Fish_13	9	9.75	10	0.25
Fish_13	12	15.75	16	0.25
Fish_2	16	13.75	14	0.25
Fish_3	3	10.75	11	0.25
Fish_2	13	1.8	2	0.2
Fish_16	12	10.85	11	0.15
Fish_1	8	1.85	2	0.15
Fish_1	15	3.1	3	0.1
Fish_19	16	0.95	1	0.05
Fish_2	15	1.95	2	0.05
Fish_3	6	1.95	2	0.05
Fish_1	1	18	18	0
Fish_1	2	18	18	0
Fish_1	4	18	18	0
Fish_1	9	0	0	0
Fish_13	1	18	18	0
Fish_13	2	18	18	0
Fish_13	3	18	18	0
Fish_13	4	18	18	0
Fish_13	5	18	18	0
Fish_13	6	18	18	0
Fish_13	8	18	18	0
Fish_13	15	18	18	0
Fish_14	1	18	18	0
Fish_14	8	18	18	0
Fish_14	12	0	0	0
Fish_14	15	18	18	0
Fish_15	1	18	18	0
Fish_15	2	18	18	0
Fish_15	4	18	18	0
Fish_15	7	18	18	0
Fish_15	8	18	18	0
Fish_15	12	18	18	0
Fish_16	1	18	18	0
Fish_16	2	0	0	0
Fish_16	5	11	11	0
Fish_16	7	18	18	0
Fish_16	8	18	18	0
Fish_16	15	18	18	0
Fish_16	16	18	18	0
Fish_19	1	18	18	0
Fish_19	2	18	18	0
Fish_19	7	18	18	0
Fish_19	8	18	18	0
Fish_19	14	18	18	0
Fish_19	15	18	18	0
Fish_2	2	18	18	0
Fish_2	4	18	18	0
Fish_2	6	0	0	0
Fish_2	10	0	0	0
Fish_2	11	18	18	0
Fish_20	1	18	18	0
Fish_20	2	18	18	0
Fish_20	3	18	18	0
Fish_20	4	18	18	0
Fish_20	6	18	18	0
Fish_20	14	18	18	0
Fish_20	15	18	18	0
Fish_26	1	18	18	0
Fish_26	2	18	18	0
Fish_26	3	18	18	0
Fish_26	4	18	18	0
Fish_26	5	18	18	0
Fish_26	11	18	18	0
Fish_3	9	0	0	0
Fish_4	2	18	18	0
Fish_4	4	18	18	0
Fish_4	7	18	18	0
Fish_4	11	18	18	0
Fish_4	13	18	18	0
Fish_5	1	18	18	0
Fish_5	3	18	18	0
Fish_5	4	18	18	0
Fish_9	1	0	0	0
Fish_9	2	18	18	0
Fish_9	8	18	18	0
Fish_13	7	*	18
Fish_14	7	*	0

## Sheet: PowerAnalysis
Difference_First 7_Last 7 trials_average_t1 (sec)				Difference_First 7_Last 7 trials_Percent_Successes
	Young fish	Old fish			Young fish	Old fish
	-2.92857	-2.05714			-0.285714	-0.142857
	-7.20714	0.828571			0.571429	0.142857
	-8.72857	-5.37143			0.428571	0
	-2.04167	-2.86429			0.142857	0.428571
	-4.69286	-4.09286			0.428571	0.285714
		-1.3				0.142857
		-4.4				0.285714
		-5.47143				0.142857
Average	-5.11976	-3.09107		Average	0.257143	0.160714
Standard deviation	2.8213	2.18027		Standard deviation	0.341067	0.17806
