# Supplementary material for: An automated feeding system for the African killifish reveals the impact of diet on lifespan and allows scalable assessment of associative learning
Source: eLife. 2022 Nov 10;11:e69008. doi: 10.7554/eLife.69008 (PMC9788828; doi:10.7554/eLife.69008)
Supplement: Figure 6—source data 6. [file elife-69008-fig6-data6.xlsx]

## Sheet: All_t1_17trials
Trial #	Fish_3	Fish_5	Fish_13	Fish_14	Fish_12 (can't validate food drop)	Fish_17 (not eating)	Fish_18 (not eating)	Fish_8 (can't validate food drop)	Fish_10 (can't validate food drop)	Fish_15	Fish_16	Fish_25 (can't validate food drop)	Fish_26	Fish_2	Fish_4	Fish_6 (not eating)	Fish_1	Fish_7 (can't validate food drop)	Fish_9	Fish_11 (can't validate food drop)	Fish_19	Fish_20
1	8	18	18	18	18	18	18	18	18	18	18	18	18	11	12	18	18	18	0	18	18	18
2	16	7	18	3	6	18	18	9	6	18	0	5	18	18	18	18	18	18	18	0	18	18
3	11	18	18	4	18	18	18	18	0	0	18	3	18	7	15	18	18	0	1	18	13	18
4	6	18	18	4	18	18	18	10	2	18	3	4	18	18	18	18	18	18	3	5	0	18
5	5	18	18	0	18	18	18	3	1	2	11	10	18	1	8	18	5	18	3	10	8	0
6	2	11	18	8	18	18	18	11	0	11	0	2	2	0	2	18	2	18	2	3	3	18
7	3	7	18	0	15	18	18	18	2	18	18	6	10	2	18	4	2	6	2	1	18	6
8	2	0	18	18	18	18	18	18	18	18	18	18	10	3	1	18	2	18	18	18	18	18
9	0	12	10	0	18	18	18	18	2	11	5	2	8	2	2	18	0	18	2	3	12	10
10	1	2	3	0	1	18	18	18	2	8	1	10	7	0	6	18	0	18	1	18	1	1
11	2	3	10	2	0	18	18	16	1	0	9	5	18	18	18	18	18	13	2	13	2	7
12	7	0	16	0	0	18	18	18	3	18	11	1	9	2	2	18	0	11	0	3	1	2
13	0	0	13	3	18	18	18	18	2	13	12	8	0	2	18	18	0	17	2	18	0	0
14	2	0	3	9	18	18	18	16	18	15	12	3	9	2	3	18	2	16	2	2	18	18
15	0	0	18	18	18	18	18	18	18	0	18	18	4	2	2	18	3	18	5	18	18	18
16	1	1	3	2	4	18	18	4	14	2	18	2	8	14	4	18	0	13	2	18	1	1
17	3	6	4	0	18	18	18	18	1	13	7	1	1	2	2	18	2	18	2	18	0	2

## Sheet: Enrolled_t1_17trials
Trial #	Fish_3	Fish_5	Fish_13	Fish_14	Fish_15	Fish_16	Fish_26	Fish_2	Fish_4	Fish_1	Fish_9	Fish_19	Fish_20
1	8	18	18	18	18	18	18	11	12	18	0	18	18
2	16	7	18	3	18	0	18	18	18	18	18	18	18
3	11	18	18	4	0	18	18	7	15	18	1	13	18
4	6	18	18	4	18	3	18	18	18	18	3	0	18
5	5	18	18	0	2	11	18	1	8	5	3	8	0
6	2	11	18	8	11	0	2	0	2	2	2	3	18
7	3	7	18	0	18	18	10	2	18	2	2	18	6
8	2	0	18	18	18	18	10	3	1	2	18	18	18
9	0	12	10	0	11	5	8	2	2	0	2	12	10
10	1	2	3	0	8	1	7	0	6	0	1	1	1
11	2	3	10	2	0	9	18	18	18	18	2	2	7
12	7	0	16	0	18	11	9	2	2	0	0	1	2
13	0	0	13	3	13	12	0	2	18	0	2	0	0
14	2	0	3	9	15	12	9	2	3	2	2	18	18
15	0	0	18	18	0	18	4	2	2	3	5	18	18
16	1	1	3	2	2	18	8	14	4	0	2	1	1
17	3	6	4	0	13	7	1	2	2	2	2	0	2
Average	4.05882	7.11765	13.1765	5.23529	10.7647	10.5294	10.3529	6.11765	8.76471	6.35294	3.82353	8.76471	10.1765
median of the average	8.76471
maximum of the average	13.1765
minimum of the average	3.82353

## Sheet: Summary_17trials
Fish	Age (days post hatching)	Sex	First 7 trials_average_t1	Last 7 trials_average_t1	First 7 trials_number_Sucesses	Last 7 trials_number_Sucesses	First 7 trials_Percent_Sucesses	Last 7 trials_Percent_Sucesses	Learning Index_2	Learning Index_3	Learning Index_4
Fish_3	47	Male	7.28571	2.14286	5	4	0.714286	0.571429	0.25	0.25	0.25
Fish_5	47	Male	13.8571	1.42857	2	2	0.285714	0.285714	0.1	0	0
Fish_13	69	Male	18	9.57143	0	3	0	0.428571	0.0625	0	0
Fish_14	69	Male	5.28571	4.85714	4	4	0.571429	0.571429	0.5	0.5	0
Fish_15	119	Male	12.1429	8.71429	1	1	0.142857	0.142857	0	0	0
Fish_16	119	Male	9.71429	12.4286	1	2	0.142857	0.285714	0	0	0
Fish_26	127	Male	14.5714	7	1	4	0.142857	0.571429	0.111111	0.0714286	0
Fish_2	130	Male	8.14286	6	2	5	0.285714	0.714286	0.142857	0.142857	0.0833333
Fish_4	130	Male	13	7	2	5	0.285714	0.714286	0.2	0.0714286	0.0714286
Fish_1	47	Female	11.5714	3.57143	3	3	0.428571	0.428571	0.2	0.2	0.2
Fish_9	112	Female	4.14286	2.14286	4	6	0.571429	0.857143	0.25	0.25	0.25
Fish_19	122	Female	11.1429	5.71429	2	1	0.285714	0.142857	0.2	0	0
Fish_20	122	Female	13.7143	6.85714	1	3	0.142857	0.428571	0.0909091	0	0
