# Supplementary material for: An automated feeding system for the African killifish reveals the impact of diet on lifespan and allows scalable assessment of associative learning
Source: eLife. 2022 Nov 10;11:e69008. doi: 10.7554/eLife.69008 (PMC9788828; doi:10.7554/eLife.69008)
Supplement: Figure 6—source data 7. [file elife-69008-fig6-data7.xlsx]

## Sheet: Fish_1
Animal ID (WT)	Video #	Second #	Animal Moving Upward? (any displacement toward the light's direction, inferred from the position the next second) (1 = yes; 0 = no)	Animal at Surface? (1 = yes; 0 = no)	Behavior Notes	Video Quality Notes	Other notes
t1	0	0	0	0	Fish at the bottom quarter of the tank
t1	0	1	0	0	Fish at the bottom quarter of the tank
t1	0	2	1	0	Fish at the bottom quarter of the tank
t1	0	3	1	0	Fish at the bottom quarter of the tank
t1	0	4	1	0	Fish at the bottom quarter of the tank
t1	0	5	1	0	Fish at the bottom quarter of the tank
t1	0	6	1	0	Fish at the bottom quarter of the tank
t1	0	7	0	0	Fish at the bottom quarter of the tank
t1	0	8	0	0	Fish at the bottom quarter of the tank
t1	0	9	0	0	Fish at the bottom quarter of the tank
t1	0	10	1	0	Fish at the bottom quarter of the tank
t1	0	11	1	0	Fish at the bottom quarter of the tank
t1	0	12	1	0	Fish at the bottom quarter of the tank
t1	0	13	1	0	Fish at the bottom quarter of the tank
t1	0	14	0	0	Fish at the bottom quarter of the tank
t1	0	15	0	0	Fish at the bottom quarter of the tank
t1	0	16	0	0	Fish at the bottom quarter of the tank
t1	0	17	0	0	Fish at the bottom quarter of the tank
t1	0	18	0	0	Fish at the bottom quarter of the tank
t1	1	0	0	0
t1	1	1	0	0
t1	1	2	0	0
t1	1	3	0	0
t1	1	4	0	0
t1	1	5	1	0
t1	1	6	0	0
t1	1	7	0	0
t1	1	8	0	0
t1	1	9	0	0
t1	1	10	0	0
t1	1	11	0	0
t1	1	12	0	0
t1	1	13	0	0
t1	1	14	1	0
t1	1	15	1	0
t1	1	16	1	0
t1	1	17	1	0
t1	1	18	1	0
t1	2	0	0	0
t1	2	1	1	0
t1	2	2	0	0
t1	2	3	0	0
t1	2	4	0	0
t1	2	5	0	0
t1	2	6	0	0
t1	2	7	0	0
t1	2	8	0	0
t1	2	9	0	0
t1	2	10	0	0
t1	2	11	0	0
t1	2	12	0	0
t1	2	13	1	0
t1	2	14	0	0
t1	2	15	0	0
t1	2	16	1	0
t1	2	17	1	0
t1	2	18	1	0
t1	3	0	0	0	Fish at the bottom of the tank
t1	3	1	0	0	Fish at the bottom of the tank
t1	3	2	0	0	Fish at the bottom of the tank
t1	3	3	0	0	Fish at the bottom of the tank
t1	3	4	0	0	Fish at the bottom of the tank
t1	3	5	0	0	Fish at the bottom of the tank
t1	3	6	0	0	Fish at the bottom of the tank
t1	3	7	0	0	Fish at the bottom of the tank
t1	3	8	0	0	Fish at the bottom of the tank
t1	3	9	0	0	Fish at the bottom of the tank
t1	3	10	0	0	Fish at the bottom of the tank
t1	3	11	0	0	Fish at the bottom of the tank
t1	3	12	1	0	Fish at the bottom of the tank
t1	3	13	0	0	Fish at the bottom of the tank
t1	3	14	0	0	Fish at the bottom of the tank
t1	3	15	1	0	Fish at the bottom of the tank
t1	3	16	0	0	Fish at the bottom of the tank
t1	3	17	1	0	Fish at the bottom of the tank
t1	3	18	1	0	Fish at the bottom of the tank
t1	4	0	0	0
t1	4	1	0	0
t1	4	2	0	0
t1	4	3	0	0
t1	4	4	0	0	Fish not in view, guessing that the fish is facing down
t1	4	5	1	0
t1	4	6	1	0
t1	4	7	1	0
t1	4	8	1	0
t1	4	9	1	0
t1	4	10	1	0
t1	4	11	1	0
t1	4	12	1	0
t1	4	13	1	0
t1	4	14	0	1	eating
t1	4	15	0	0
t1	4	16	1	0
t1	4	17	1	0
t1	4	18	0	1	eating
t1	5	0	0	0
t1	5	1	0	0
t1	5	2	1	0
t1	5	3	1	0
t1	5	4	0	1
t1	5	5	0	1
t1	5	6	0	1
t1	5	7	1	1
t1	5	8	0	1
t1	5	9	0	1
t1	5	10	0	1
t1	5	11	0	1
t1	5	12	0	1
t1	5	13	0	1	eating
t1	5	14	0	1	eating
t1	5	15	0	1	eating
t1	5	16	0	1	eating
t1	5	17	0	1	eating
t1	5	18	0	1	eating
t1	6	0	0	0
t1	6	1	0	0
t1	6	2	1	0
t1	6	3	1	0
t1	6	4	1	0
t1	6	5	1	0
t1	6	6	0	1
t1	6	7	0	1
t1	6	8	0	1
t1	6	9	0	1
t1	6	10	0	1
t1	6	11	0	1
t1	6	12	0	1
t1	6	13	0	1	eating
t1	6	14	0	1
t1	6	15	1	0
t1	6	16	1	0
t1	6	17	1	0
t1	6	18	0	1
t1	7	0	0	0
t1	7	1	0	0
t1	7	2	1	0
t1	7	3	1	0
t1	7	4	1	0
t1	7	5	0	1
t1	7	6	0	1
t1	7	7	0	1
t1	7	8	0	1
t1	7	9	0	1
t1	7	10	0	1
t1	7	11	0	1
t1	7	12	0	1
t1	7	13	0	1
t1	7	14	0	1	eating
t1	7	15	0	1	eating
t1	7	16	0	1	eating
t1	7	17	1	0	eating
t1	7	18	0	1	eating
t1	8	0	0	1
t1	8	1	0	1
t1	8	2	0	1
t1	8	3	0	1
t1	8	4	0	1
t1	8	5	0	1
t1	8	6	0	1
t1	8	7	0	1
t1	8	8	0	1
t1	8	9	0	1
t1	8	10	0	1
t1	8	11	0	1
t1	8	12	0	1
t1	8	13	0	1
t1	8	14	0	1	eating
t1	8	15	0	1	eating
t1	8	16	0	1	eating
t1	8	17	0	1	eating
t1	8	18	0	1	eating
t1	9	0	0	1
t1	9	1	0	1
t1	9	2	0	1
t1	9	3	0	0
t1	9	4	0	0
t1	9	5	0	0
t1	9	6	1	0
t1	9	7	1	0
t1	9	8	0	1
t1	9	9	0	1
t1	9	10	0	1
t1	9	11	0	1
t1	9	12	0	0
t1	9	13	0	0
t1	9	14	0	0
t1	9	15	0	0
t1	9	16	0	0
t1	9	17	0	0
t1	9	18	1	0
t1	10	0	1	0
t1	10	1	1	0
t1	10	2	1	0
t1	10	3	1	0
t1	10	4	1	0
t1	10	5	1	0
t1	10	6	1	0
t1	10	7	1	0
t1	10	8	1	0
t1	10	9	0	0
t1	10	10	0	0
t1	10	11	0	0
t1	10	12	0	0
t1	10	13	0	0
t1	10	14	0	0
t1	10	15	0	0
t1	10	16	1	0
t1	10	17	0	0
t1	10	18	0	0
t1	11	0	0	1
t1	11	1	0	0
t1	11	2	0	0
t1	11	3	0	0
t1	11	4	0	0
t1	11	5	0	0
t1	11	6	0	0
t1	11	7	0	0
t1	11	8	1	0
t1	11	9	1	0
t1	11	10	1	0
t1	11	11	0	1
t1	11	12	0	1
t1	11	13	0	1
t1	11	14	0	1	eating
t1	11	15	0	1	eating
t1	11	16	0	1	eating
t1	11	17	0	1	eating
t1	11	18	0	1	eating
t1	12	0	1	0
t1	12	1	1	0
t1	12	2	0	1
t1	12	3	0	1
t1	12	4	0	0
t1	12	5	0	0
t1	12	6	0	0
t1	12	7	0	0
t1	12	8	0	0
t1	12	9	1	0
t1	12	10	1	0
t1	12	11	1	0
t1	12	12	0	1	eating
t1	12	13	0	1	eating
t1	12	14	0	1	eating
t1	12	15	0	1	eating
t1	12	16	0	1	eating
t1	12	17	0	1	eating
t1	12	18	0	1	eating
t1	13	0	0	0
t1	13	1	0	0
t1	13	2	1	0
t1	13	3	1	0
t1	13	4	1	0
t1	13	5	0	1
t1	13	6	0	1
t1	13	7	0	1
t1	13	8	0	1
t1	13	9	0	1
t1	13	10	0	1
t1	13	11	0	1
t1	13	12	0	1	eating
t1	13	13	0	1	eating
t1	13	14	0	1	eating
t1	13	15	0	1	eating
t1	13	16	0	1	eating
t1	13	17	0	0
t1	13	18	0	0
t1	14	0	0	0
t1	14	1	0	0
t1	14	2	0	0
t1	14	3	1	0
t1	14	4	1	0
t1	14	5	1	0
t1	14	6	0	1
t1	14	7	0	1
t1	14	8	0	1
t1	14	9	0	1
t1	14	10	0	1
t1	14	11	0	1
t1	14	12	0	1
t1	14	13	0	1	eating
t1	14	14	0	1	eating
t1	14	15	0	1	eating
t1	14	16	0	1	eating
t1	14	17	0	1	eating
t1	14	18	0	1	eating
t1	15	0	1	0
t1	15	1	1	0
t1	15	2	1	0
t1	15	3	1	0
t1	15	4	1	0
t1	15	5	1	0
t1	15	6	0	1
t1	15	7	0	1			No food drop
t1	15	8	1	0
t1	15	9	1	0
t1	15	10	0	0
t1	15	11	0	0
t1	15	12	1	0
t1	15	13	1	0
t1	15	14	0	1	eating?
t1	15	15	0	1	eating?
t1	15	16	0	1	eating?
t1	15	17	0	1	eating?
t1	15	18	0	1	eating?
t1	16	0	0	0
t1	16	1	0	0
t1	16	2	1	0
t1	16	3	1	0
t1	16	4	1	0
t1	16	5	0	1
t1	16	6	0	1
t1	16	7	0	1
t1	16	8	0	1
t1	16	9	0	1
t1	16	10	0	1
t1	16	11	0	1
t1	16	12	0	1	eating
t1	16	13	0	1	eating
t1	16	14	0	1	eating
t1	16	15	0	1	eating
t1	16	16	0	1	eating
t1	16	17	0	1	eating
t1	16	18	0	1	eating
t1	17	0	0	1
t1	17	1	0	1
t1	17	2	0	1
t1	17	3	0	1
t1	17	4	0	1
t1	17	5	0	1
t1	17	6	0	1
t1	17	7	0	1
t1	17	8	0	1
t1	17	9	0	1
t1	17	10	0	1
t1	17	11	0	1
t1	17	12	0	1
t1	17	13	0	1
t1	17	14	0	1
t1	17	15	0	1
t1	17	16	0	1
t1	17	17	0	1
t1	17	18	0	1
t1	18	0	0	1
t1	18	1	0	0
t1	18	2	1	0
t1	18	3	0	1
t1	18	4	0	1
t1	18	5	0	1
t1	18	6	0	1
t1	18	7	0	1
t1	18	8	0	1
t1	18	9	0	1
t1	18	10	0	1
t1	18	11	0	1
t1	18	12	0	1
t1	18	13	0	1
t1	18	14	0	1
t1	18	15	0	1	eating
t1	18	16	0	1	eating
t1	18	17	0	1	eating
t1	18	18	0	1	eating
t1	19	0	0	0
t1	19	1	1	0
t1	19	2	1	0
t1	19	3	1	0
t1	19	4	1	0
t1	19	5	0	1
t1	19	6	0	1
t1	19	7	0	1
t1	19	8	0	1
t1	19	9	0	1
t1	19	10	0	1
t1	19	11	0	1
t1	19	12	0	1
t1	19	13	0	1
t1	19	14	0	1
t1	19	15	0	1
t1	19	16	0	1	eating
t1	19	17	0	1	eating
t1	19	18	0	1	eating
t1	20	0	0	0
t1	20	1	0	0
t1	20	2	1	0
t1	20	3	1	0
t1	20	4	0	1
t1	20	5	0	1
t1	20	6	0	1
t1	20	7	0	1
t1	20	8	0	1
t1	20	9	0	1
t1	20	10	0	1
t1	20	11	0	1
t1	20	12	0	1
t1	20	13	0	1	eating
t1	20	14	0	1	eating
t1	20	15	0	1	eating
t1	20	16	0	1	eating
t1	20	17	0	1	eating
t1	20	18	0	1	eating
t1	21	0	0	0
t1	21	1	0	0
t1	21	2	1	0
t1	21	3	1	0
t1	21	4	0	1
t1	21	5	0	1
t1	21	6	0	1
t1	21	7	0	1
t1	21	8	0	1
t1	21	9	0	1
t1	21	10	0	1
t1	21	11	0	1	eating
t1	21	12	0	1	eating
t1	21	13	0	1	eating
t1	21	14	0	1	eating
t1	21	15	0	1	eating
t1	21	16	0	1	eating
t1	21	17	0	1	eating
t1	21	18	0	1	eating

## Sheet: Fish_7
Animal ID (WT)	Video #	Second #	Animal Moving Upward? (any displacement toward the light's direction, inferred from the position the next second) (1 = yes; 0 = no)	Animal at Surface? (1 = yes; 0 = no)	Behavior Notes	Video Quality Notes	Other notes
t7	0	0	0	0	within 2 cm from surface		Can't validate food drop
t7	0	1	0	0	within 2 cm from surface		Can't validate food drop
t7	0	2	0	0	within 2 cm from surface		Can't validate food drop
t7	0	3	0	0	within 2 cm from surface		Can't validate food drop
t7	0	4	0	0	within 2 cm from surface		Can't validate food drop
t7	0	5	0	0	within 2 cm from surface		Can't validate food drop
t7	0	6	0	0	within 2 cm from surface		Can't validate food drop
t7	0	7	0	0	within 2 cm from surface		Can't validate food drop
t7	0	8	0	0	within 2 cm from surface		Can't validate food drop
t7	0	9	0	0	within 2 cm from surface		Can't validate food drop
t7	0	10	0	0	within 2 cm from surface		Can't validate food drop
t7	0	11	0	0	within 2 cm from surface		Can't validate food drop
t7	0	12	0	0	within 2 cm from surface		Can't validate food drop
t7	0	13	0	0	within 2 cm from surface		Can't validate food drop
t7	0	14	0	0	within 2 cm from surface		Can't validate food drop
t7	0	15	0	0	within 2 cm from surface		Can't validate food drop
t7	0	16	0	0	within 2 cm from surface		Can't validate food drop
t7	0	17	0	0	within 2 cm from surface		Can't validate food drop
t7	0	18	0	0	within 2 cm from surface		Can't validate food drop
t7	1	0	1	0	Fish at the bottom quarter of the tank		Can't validate food drop
t7	1	1	0	0	Fish at the bottom quarter of the tank		Can't validate food drop
t7	1	2	1	0	Fish at the bottom quarter of the tank		Can't validate food drop
t7	1	3	1	0	Fish at the bottom quarter of the tank		Can't validate food drop
t7	1	4	1	0	Fish at the bottom quarter of the tank		Can't validate food drop
t7	1	5	1	0	Fish at the bottom quarter of the tank		Can't validate food drop
t7	1	6	0	0	Fish at the bottom quarter of the tank		Can't validate food drop
t7	1	7	0	0	Fish at the bottom quarter of the tank		Can't validate food drop
t7	1	8	0	0	Fish at the bottom quarter of the tank		Can't validate food drop
t7	1	9	0	0	Fish at the bottom quarter of the tank		Can't validate food drop
t7	1	10	0	0	Fish at the bottom quarter of the tank		Can't validate food drop
t7	1	11	0	0	Fish at the bottom quarter of the tank		Can't validate food drop
t7	1	12	0	0	Fish at the bottom quarter of the tank		Can't validate food drop
t7	1	13	0	0	Fish at the bottom quarter of the tank		Can't validate food drop
t7	1	14	0	0	Fish at the bottom quarter of the tank		Can't validate food drop
t7	1	15	0	0	Fish at the bottom quarter of the tank		Can't validate food drop
t7	1	16	0	0	Fish at the bottom quarter of the tank		Can't validate food drop
t7	1	17	0	0	Fish at the bottom quarter of the tank		Can't validate food drop
t7	1	18	0	0	Fish at the bottom quarter of the tank		Can't validate food drop
t7	2	0	0	1			Can't validate food drop
t7	2	1	0	1			Can't validate food drop
t7	2	2	0	1			Can't validate food drop
t7	2	3	0	1			Can't validate food drop
t7	2	4	0	1			Can't validate food drop
t7	2	5	0	1			Can't validate food drop
t7	2	6	0	1			Can't validate food drop
t7	2	7	0	1			Can't validate food drop
t7	2	8	0	1			Can't validate food drop
t7	2	9	1	0			Can't validate food drop
t7	2	10	0	1			Can't validate food drop
t7	2	11	0	0			Can't validate food drop
t7	2	12	0	0			Can't validate food drop
t7	2	13	0	0			Can't validate food drop
t7	2	14	0	0			Can't validate food drop
t7	2	15	0	0			Can't validate food drop
t7	2	16	1	0			Can't validate food drop
t7	2	17	1	0			Can't validate food drop
t7	2	18	1	0			Can't validate food drop
t7	3	0	0	0			Can't validate food drop
t7	3	1	0	0			Can't validate food drop
t7	3	2	0	0			Can't validate food drop
t7	3	3	0	0			Can't validate food drop
t7	3	4	0	0			Can't validate food drop
t7	3	5	1	0			Can't validate food drop
t7	3	6	1	0			Can't validate food drop
t7	3	7	1	0			Can't validate food drop
t7	3	8	1	0			Can't validate food drop
t7	3	9	1	0			Can't validate food drop
t7	3	10	1	0			Can't validate food drop
t7	3	11	0	0			Can't validate food drop
t7	3	12	1	0			Can't validate food drop
t7	3	13	0	0			Can't validate food drop
t7	3	14	0	0			Can't validate food drop
t7	3	15	1	0			Can't validate food drop
t7	3	16	1	0			Can't validate food drop
t7	3	17	1	0			Can't validate food drop
t7	3	18	0	0			Can't validate food drop
t7	4	0	0	0			Can't validate food drop
t7	4	1	0	0			Can't validate food drop
t7	4	2	1	0			Can't validate food drop
t7	4	3	0	0			Can't validate food drop
t7	4	4	1	0			Can't validate food drop
t7	4	5	1	0			Can't validate food drop
t7	4	6	1	0			Can't validate food drop
t7	4	7	1	0			Can't validate food drop
t7	4	8	0	0			Can't validate food drop
t7	4	9	0	0			Can't validate food drop
t7	4	10	0	0			Can't validate food drop
t7	4	11	0	0			Can't validate food drop
t7	4	12	0	0			Can't validate food drop
t7	4	13	0	0			Can't validate food drop
t7	4	14	0	0			Can't validate food drop
t7	4	15	0	0			Can't validate food drop
t7	4	16	1	0			Can't validate food drop
t7	4	17	1	0			Can't validate food drop
t7	4	18	1	0			Can't validate food drop
t7	5	0	1	0			Can't validate food drop
t7	5	1	1	0			Can't validate food drop
t7	5	2	0	0			Can't validate food drop
t7	5	3	1	0			Can't validate food drop
t7	5	4	0	0			Can't validate food drop
t7	5	5	0	0			Can't validate food drop
t7	5	6	0	0			Can't validate food drop
t7	5	7	0	0			Can't validate food drop
t7	5	8	1	0			Can't validate food drop
t7	5	9	1	0			Can't validate food drop
t7	5	10	1	0			Can't validate food drop
t7	5	11	1	0			Can't validate food drop
t7	5	12	1	0			Can't validate food drop
t7	5	13	1	0			Can't validate food drop
t7	5	14	0	0			Can't validate food drop
t7	5	15	0	0			Can't validate food drop
t7	5	16	0	0			Can't validate food drop
t7	5	17	0	0			Can't validate food drop
t7	5	18	0	0			Can't validate food drop
t7	6	0	0	0			Can't validate food drop
t7	6	1	0	0			Can't validate food drop
t7	6	2	0	0			Can't validate food drop
t7	6	3	0	0			Can't validate food drop
t7	6	4	0	0			Can't validate food drop
t7	6	5	0	0			Can't validate food drop
t7	6	6	1	0			Can't validate food drop
t7	6	7	1	0			Can't validate food drop
t7	6	8	1	0			Can't validate food drop
t7	6	9	1	0			Can't validate food drop
t7	6	10	0	1			Can't validate food drop
t7	6	11	1	0			Can't validate food drop
t7	6	12	1	0			Can't validate food drop
t7	6	13	1	0			Can't validate food drop
t7	6	14	0	0			Can't validate food drop
t7	6	15	1	0			Can't validate food drop
t7	6	16	0	0			Can't validate food drop
t7	6	17	1	0			Can't validate food drop
t7	6	18	1	0	Reaches surface at end of 18 seconds		Can't validate food drop
t7	7	0	0	0	Fish at the bottom of the tank		Can't validate food drop
t7	7	1	0	0	Fish at the bottom of the tank		Can't validate food drop
t7	7	2	0	0	Fish at the bottom of the tank		Can't validate food drop
t7	7	3	0	0	Fish at the bottom of the tank		Can't validate food drop
t7	7	4	0	0	Fish at the bottom of the tank		Can't validate food drop
t7	7	5	0	0	Fish at the bottom of the tank		Can't validate food drop
t7	7	6	0	0	Fish at the bottom of the tank		Can't validate food drop
t7	7	7	0	0	Fish at the bottom of the tank		Can't validate food drop
t7	7	8	0	0	Fish at the bottom of the tank		Can't validate food drop
t7	7	9	0	0	Fish at the bottom of the tank		Can't validate food drop
t7	7	10	0	0	Fish at the bottom of the tank		Can't validate food drop
t7	7	11	0	0	Fish at the bottom of the tank		Can't validate food drop
t7	7	12	0	0	Fish at the bottom of the tank		Can't validate food drop
t7	7	13	0	0	Fish at the bottom of the tank		Can't validate food drop
t7	7	14	0	0	Fish at the bottom of the tank		Can't validate food drop
t7	7	15	0	0	Fish at the bottom of the tank		Can't validate food drop
t7	7	16	0	0	Fish at the bottom of the tank		Can't validate food drop
t7	7	17	0	0	Fish at the bottom of the tank		Can't validate food drop
t7	7	18	0	0	Fish at the bottom of the tank		Can't validate food drop
t7	8	0	0	0	Fish at the bottom of the tank		Can't validate food drop
t7	8	1	0	0	Fish at the bottom of the tank		Can't validate food drop
t7	8	2	0	0	Fish at the bottom of the tank		Can't validate food drop
t7	8	3	0	0	Fish at the bottom of the tank		Can't validate food drop
t7	8	4	0	0	Fish at the bottom of the tank		Can't validate food drop
t7	8	5	0	0	Fish at the bottom of the tank		Can't validate food drop
t7	8	6	0	0	Fish at the bottom of the tank		Can't validate food drop
t7	8	7	0	0	Fish at the bottom of the tank		Can't validate food drop
t7	8	8	1	0	Fish at the bottom of the tank		Can't validate food drop
t7	8	9	0	0	Fish at the bottom of the tank		Can't validate food drop
t7	8	10	0	0	Fish at the bottom of the tank		Can't validate food drop
t7	8	11	0	0	Fish at the bottom of the tank		Can't validate food drop
t7	8	12	0	0	Fish at the bottom of the tank		Can't validate food drop
t7	8	13	0	0	Fish at the bottom of the tank		Can't validate food drop
t7	8	14	0	0	Fish at the bottom of the tank		Can't validate food drop
t7	8	15	0	0	Fish at the bottom of the tank		Can't validate food drop
t7	8	16	0	0	Fish at the bottom of the tank		Can't validate food drop
t7	8	17	0	0	Fish at the bottom of the tank		Can't validate food drop
t7	8	18	0	0	Fish at the bottom of the tank		Can't validate food drop
t7	9	0	0	0	Fish at the bottom of the tank		Can't validate food drop
t7	9	1	1	0	Fish at the bottom of the tank		Can't validate food drop
t7	9	2	0	0	Fish at the bottom of the tank		Can't validate food drop
t7	9	3	0	0	Fish at the bottom of the tank		Can't validate food drop
t7	9	4	0	0	Fish at the bottom of the tank		Can't validate food drop
t7	9	5	0	0	Fish at the bottom of the tank		Can't validate food drop
t7	9	6	0	0	Fish at the bottom of the tank		Can't validate food drop
t7	9	7	0	0	Fish at the bottom of the tank		Can't validate food drop
t7	9	8	0	0	Fish at the bottom of the tank		Can't validate food drop
t7	9	9	0	0	Fish at the bottom of the tank		Can't validate food drop
t7	9	10	0	0	Fish at the bottom of the tank		Can't validate food drop
t7	9	11	0	0	Fish at the bottom of the tank		Can't validate food drop
t7	9	12	0	0	Fish at the bottom of the tank		Can't validate food drop
t7	9	13	0	0	Fish at the bottom of the tank		Can't validate food drop
t7	9	14	0	0	Fish at the bottom of the tank		Can't validate food drop
t7	9	15	0	0	Fish at the bottom of the tank		Can't validate food drop
t7	9	16	0	0	Fish at the bottom of the tank		Can't validate food drop
t7	9	17	0	0	Fish at the bottom of the tank		Can't validate food drop
t7	9	18	0	0	Fish at the bottom of the tank		Can't validate food drop
t7	10	0	1	0			Can't validate food drop
t7	10	1	1	0			Can't validate food drop
t7	10	2	1	0			Can't validate food drop
t7	10	3	0	0			Can't validate food drop
t7	10	4	0	0			Can't validate food drop
t7	10	5	0	0			Can't validate food drop
t7	10	6	0	0			Can't validate food drop
t7	10	7	0	0			Can't validate food drop
t7	10	8	1	0			Can't validate food drop
t7	10	9	1	0			Can't validate food drop
t7	10	10	1	0			Can't validate food drop
t7	10	11	1	0			Can't validate food drop
t7	10	12	0	0			Can't validate food drop
t7	10	13	1	0			Can't validate food drop
t7	10	14	1	0			Can't validate food drop
t7	10	15	1	0			Can't validate food drop
t7	10	16	0	1			Can't validate food drop
t7	10	17	0	1			Can't validate food drop
t7	10	18	0	1			Can't validate food drop
t7	11	0	0	0			Can't validate food drop
t7	11	1	0	0			Can't validate food drop
t7	11	2	0	0			Can't validate food drop
t7	11	3	1	0			Can't validate food drop
t7	11	4	1	0			Can't validate food drop
t7	11	5	1	0			Can't validate food drop
t7	11	6	1	0			Can't validate food drop
t7	11	7	1	0			Can't validate food drop
t7	11	8	1	0			Can't validate food drop
t7	11	9	0	0			Can't validate food drop
t7	11	10	0	0			Can't validate food drop
t7	11	11	1	0			Can't validate food drop
t7	11	12	0	1			Can't validate food drop
t7	11	13	0	0	pretty near surface		Can't validate food drop
t7	11	14	0	0			Can't validate food drop
t7	11	15	0	0			Can't validate food drop
t7	11	16	0	0			Can't validate food drop
t7	11	17	0	0			Can't validate food drop
t7	11	18	1	0			Can't validate food drop
t7	12	0	1	0			Can't validate food drop
t7	12	1	1	0			Can't validate food drop
t7	12	2	0	0			Can't validate food drop
t7	12	3	0	0			Can't validate food drop
t7	12	4	0	0			Can't validate food drop
t7	12	5	1	0			Can't validate food drop
t7	12	6	0	0			Can't validate food drop
t7	12	7	0	0			Can't validate food drop
t7	12	8	1	0			Can't validate food drop
t7	12	9	0	0			Can't validate food drop
t7	12	10	0	0			Can't validate food drop
t7	12	11	0	0			Can't validate food drop
t7	12	12	1	0			Can't validate food drop
t7	12	13	1	0			Can't validate food drop
t7	12	14	1	0			Can't validate food drop
t7	12	15	1	0			Can't validate food drop
t7	12	16	0	0			Can't validate food drop
t7	12	17	1	0			Can't validate food drop
t7	12	18	1	0	Reaches surface at 20 seconds		Can't validate food drop
t7	13	0	0	0			Can't validate food drop
t7	13	1	0	0			Can't validate food drop
t7	13	2	0	0			Can't validate food drop
t7	13	3	0	0			Can't validate food drop
t7	13	4	0	0			Can't validate food drop
t7	13	5	0	0			Can't validate food drop
t7	13	6	0	0			Can't validate food drop
t7	13	7	0	0			Can't validate food drop
t7	13	8	0	0			Can't validate food drop
t7	13	9	0	0			Can't validate food drop
t7	13	10	0	0			Can't validate food drop
t7	13	11	0	0			Can't validate food drop
t7	13	12	0	0			Can't validate food drop
t7	13	13	0	0			Can't validate food drop
t7	13	14	0	0			Can't validate food drop
t7	13	15	0	0			Can't validate food drop
t7	13	16	1	0			Can't validate food drop
t7	13	17	1	0			Can't validate food drop
t7	13	18	1	0	ultimately reaches surface		Can't validate food drop
t7	14	0	0	0	Fish at the bottom of the tank		Can't validate food drop
t7	14	1	0	0	Fish at the bottom of the tank		Can't validate food drop
t7	14	2	0	0	Fish at the bottom of the tank		Can't validate food drop
t7	14	3	0	0	Fish at the bottom of the tank		Can't validate food drop
t7	14	4	0	0	Fish at the bottom of the tank		Can't validate food drop
t7	14	5	0	0	Fish at the bottom of the tank		Can't validate food drop
t7	14	6	0	0	Fish at the bottom of the tank		Can't validate food drop
t7	14	7	0	0	Fish at the bottom of the tank		Can't validate food drop
t7	14	8	0	0	Fish at the bottom of the tank		Can't validate food drop
t7	14	9	0	0	Fish at the bottom of the tank		Can't validate food drop
t7	14	10	0	0	Fish at the bottom of the tank		Can't validate food drop
t7	14	11	0	0	Fish at the bottom of the tank		Can't validate food drop
t7	14	12	0	0	Fish at the bottom of the tank		Can't validate food drop
t7	14	13	0	0	Fish at the bottom of the tank		Can't validate food drop
t7	14	14	0	0	Fish at the bottom of the tank		Can't validate food drop
t7	14	15	0	0	Fish at the bottom of the tank		Can't validate food drop
t7	14	16	0	0	Fish at the bottom of the tank		Can't validate food drop
t7	14	17	0	0	Fish at the bottom of the tank		Can't validate food drop
t7	14	18	0	0	Fish at the bottom of the tank		Can't validate food drop
t7	15	0	0	0			Can't validate food drop
t7	15	1	0	0			Can't validate food drop
t7	15	2	0	0			Can't validate food drop
t7	15	3	0	0			Can't validate food drop
t7	15	4	0	0			Can't validate food drop
t7	15	5	0	0			Can't validate food drop
t7	15	6	0	0			Can't validate food drop
t7	15	7	0	0			Can't validate food drop
t7	15	8	0	0			Can't validate food drop
t7	15	9	0	0			Can't validate food drop
t7	15	10	0	0			Can't validate food drop
t7	15	11	0	0			Can't validate food drop
t7	15	12	0	0			Can't validate food drop
t7	15	13	1	0			Can't validate food drop
t7	15	14	1	0			Can't validate food drop
t7	15	15	1	0			Can't validate food drop
t7	15	16	1	0			Can't validate food drop
t7	15	17	1	0			Can't validate food drop
t7	15	18	1	1	Reaches surface at 19 seconds		Can't validate food drop
t7	16	0	1	0	Fish at the bottom of the tank		Can't validate food drop
t7	16	1	1	0	Fish at the bottom of the tank		Can't validate food drop
t7	16	2	0	0	Fish at the bottom of the tank		Can't validate food drop
t7	16	3	1	0	Fish at the bottom of the tank		Can't validate food drop
t7	16	4	0	0	Fish at the bottom of the tank		Can't validate food drop
t7	16	5	0	0	Fish at the bottom of the tank		Can't validate food drop
t7	16	6	0	0	Fish at the bottom of the tank		Can't validate food drop
t7	16	7	0	0	Fish at the bottom of the tank		Can't validate food drop
t7	16	8	0	0	Fish at the bottom of the tank		Can't validate food drop
t7	16	9	1	0	Fish at the bottom of the tank		Can't validate food drop
t7	16	10	0	0	Fish at the bottom of the tank		Can't validate food drop
t7	16	11	0	0	Fish at the bottom of the tank		Can't validate food drop
t7	16	12	0	0	Fish at the bottom of the tank		Can't validate food drop
t7	16	13	0	0	Fish at the bottom of the tank		Can't validate food drop
t7	16	14	0	0	Fish at the bottom of the tank		Can't validate food drop
t7	16	15	0	0	Fish at the bottom of the tank		Can't validate food drop
t7	16	16	0	0	Fish at the bottom of the tank		Can't validate food drop
t7	16	17	0	0	Fish at the bottom of the tank		Can't validate food drop
t7	16	18	0	0	Fish at the bottom of the tank		Can't validate food drop
t7	17	0	0	1			Can't validate food drop
t7	17	1	0	0			Can't validate food drop
t7	17	2	1	0			Can't validate food drop
t7	17	3	0	0			Can't validate food drop
t7	17	4	0	0			Can't validate food drop
t7	17	5	1	0			Can't validate food drop
t7	17	6	1	0			Can't validate food drop
t7	17	7	1	0			Can't validate food drop
t7	17	8	1	0			Can't validate food drop
t7	17	9	1	0			Can't validate food drop
t7	17	10	1	0			Can't validate food drop
t7	17	11	0	1			Can't validate food drop
t7	17	12	0	1			Can't validate food drop
t7	17	13	0	0			Can't validate food drop
t7	17	14	1	0			Can't validate food drop
t7	17	15	1	0			Can't validate food drop
t7	17	16	0	1			Can't validate food drop
t7	17	17	0	0			Can't validate food drop
t7	17	18	0	0			Can't validate food drop
t7	18	0	1	0			Can't validate food drop
t7	18	1	1	0			Can't validate food drop
t7	18	2	0	0			Can't validate food drop
t7	18	3	1	0			Can't validate food drop
t7	18	4	1	0			Can't validate food drop
t7	18	5	0	1			Can't validate food drop
t7	18	6	1	0			Can't validate food drop
t7	18	7	0	0			Can't validate food drop
t7	18	8	0	0			Can't validate food drop
t7	18	9	0	0			Can't validate food drop
t7	18	10	0	0			Can't validate food drop
t7	18	11	1	0			Can't validate food drop
t7	18	12	1	0			Can't validate food drop
t7	18	13	0	0			Can't validate food drop
t7	18	14	1	0			Can't validate food drop
t7	18	15	1	0			Can't validate food drop
t7	18	16	1	0			Can't validate food drop
t7	18	17	1	0			Can't validate food drop
t7	18	18	0	0			Can't validate food drop
t7	19	0	1	0			Can't validate food drop
t7	19	1	1	0			Can't validate food drop
t7	19	2	0	1			Can't validate food drop
t7	19	3	0	0			Can't validate food drop
t7	19	4	0	0			Can't validate food drop
t7	19	5	0	0			Can't validate food drop
t7	19	6	0	0			Can't validate food drop
t7	19	7	1	0			Can't validate food drop
t7	19	8	1	0			Can't validate food drop
t7	19	9	1	0			Can't validate food drop
t7	19	10	0	0			Can't validate food drop
t7	19	11	0	0			Can't validate food drop
t7	19	12	0	0			Can't validate food drop
t7	19	13	0	0			Can't validate food drop
t7	19	14	1	0			Can't validate food drop
t7	19	15	1	0			Can't validate food drop
t7	19	16	0	0			Can't validate food drop
t7	19	17	0	0			Can't validate food drop
t7	19	18	0	0			Can't validate food drop
t7	20	0	0	0			Can't validate food drop
t7	20	1	0	0			Can't validate food drop
t7	20	2	0	0			Can't validate food drop
t7	20	3	0	0			Can't validate food drop
t7	20	4	1	0			Can't validate food drop
t7	20	5	0	0			Can't validate food drop
t7	20	6	0	0			Can't validate food drop
t7	20	7	1	0			Can't validate food drop
t7	20	8	1	0			Can't validate food drop
t7	20	9	1	0			Can't validate food drop
t7	20	10	0	0			Can't validate food drop
t7	20	11	1	0			Can't validate food drop
t7	20	12	1	0			Can't validate food drop
t7	20	13	0	0			Can't validate food drop
t7	20	14	0	0			Can't validate food drop
t7	20	15	0	0			Can't validate food drop
t7	20	16	0	0			Can't validate food drop
t7	20	17	0	0			Can't validate food drop
t7	20	18	0	0			Can't validate food drop
t7	21	0	0	0	Fish at the bottom of the tank		Can't validate food drop
t7	21	1	0	0	Fish at the bottom of the tank		Can't validate food drop
t7	21	2	0	0	Fish at the bottom of the tank		Can't validate food drop
t7	21	3	0	0	Fish at the bottom of the tank		Can't validate food drop
t7	21	4	0	0	Fish at the bottom of the tank		Can't validate food drop
t7	21	5	0	0	Fish at the bottom of the tank		Can't validate food drop
t7	21	6	0	0	Fish at the bottom of the tank		Can't validate food drop
t7	21	7	0	0	Fish at the bottom of the tank		Can't validate food drop
t7	21	8	0	0	Fish at the bottom of the tank		Can't validate food drop
t7	21	9	0	0	Fish at the bottom of the tank		Can't validate food drop
t7	21	10	0	0	Fish at the bottom of the tank		Can't validate food drop
t7	21	11	0	0	Fish at the bottom of the tank		Can't validate food drop
t7	21	12	0	0	Fish at the bottom of the tank		Can't validate food drop
t7	21	13	0	0	Fish at the bottom of the tank		Can't validate food drop
t7	21	14	0	0	Fish at the bottom of the tank		Can't validate food drop
t7	21	15	0	0	Fish at the bottom of the tank		Can't validate food drop
t7	21	16	0	0	Fish at the bottom of the tank		Can't validate food drop
t7	21	17	0	0	Fish at the bottom of the tank		Can't validate food drop
t7	21	18	0	0	Fish at the bottom of the tank		Can't validate food drop

## Sheet: Fish_9
Animal ID (WT)	Video #	Second #	Animal Moving Upward? (any displacement toward the light's direction, inferred from the position the next second) (1 = yes; 0 = no)	Animal at Surface? (1 = yes; 0 = no)	Behavior Notes	Video Quality Notes	Other notes
t9	0	0	0	1		Out of focus. Video is dark	biofilm on bottom gets dirtier as time goes. Could affect reflection of red light?
t9	0	1	0	1		Out of focus. Video is dark
t9	0	2	0	1		Out of focus. Video is dark
t9	0	3	0	1		Out of focus. Video is dark
t9	0	4	0	0		Out of focus. Video is dark
t9	0	5	0	0		Out of focus. Video is dark
t9	0	6	0	0		Out of focus. Video is dark
t9	0	7	0	0		Out of focus. Video is dark
t9	0	8	0	0		Out of focus. Video is dark
t9	0	9	0	0		Out of focus. Video is dark
t9	0	10	0	0		Out of focus. Video is dark
t9	0	11	0	0		Out of focus. Video is dark
t9	0	12	0	0		Out of focus. Video is dark
t9	0	13	0	0		Out of focus. Video is dark
t9	0	14	0	0		Out of focus. Video is dark
t9	0	15	0	0		Out of focus. Video is dark
t9	0	16	0	0		Out of focus. Video is dark
t9	0	17	1	0		Out of focus. Video is dark
t9	0	18	0	0		Out of focus. Video is dark
t9	1	0	0	0	Fish is at the bottom of the tank.	Out of focus. Video is dark
t9	1	1	0	0	Fish is at the bottom of the tank.	Out of focus. Video is dark
t9	1	2	0	0	Fish is at the bottom of the tank.	Out of focus. Video is dark
t9	1	3	0	0	Fish is at the bottom of the tank.	Out of focus. Video is dark
t9	1	4	0	0	Fish is at the bottom of the tank.	Out of focus. Video is dark
t9	1	5	1	0	Fish is at the bottom of the tank.	Out of focus. Video is dark
t9	1	6	0	0	Fish is at the bottom of the tank.	Out of focus. Video is dark
t9	1	7	0	0	Fish is at the bottom of the tank.	Out of focus. Video is dark
t9	1	8	1	0	Fish is at the bottom of the tank.	Out of focus. Video is dark
t9	1	9	1	0	Fish is at the bottom of the tank.	Out of focus. Video is dark
t9	1	10	0	0	Fish is at the bottom of the tank.	Out of focus. Video is dark
t9	1	11	1	0	Fish is at the bottom of the tank.	Out of focus. Video is dark
t9	1	12	1	0	Fish is at the bottom of the tank.	Out of focus. Video is dark
t9	1	13	0	0	Fish is at the bottom of the tank.	Out of focus. Video is dark
t9	1	14	0	0	Fish is at the bottom of the tank.	Out of focus. Video is dark
t9	1	15	0	0	Fish is at the bottom of the tank.	Out of focus. Video is dark
t9	1	16	0	0	Fish is at the bottom of the tank.	Out of focus. Video is dark
t9	1	17	0	0	Fish is at the bottom of the tank.	Out of focus. Video is dark
t9	1	18	1	0	Fish is at the bottom of the tank.	Out of focus. Video is dark
t9	2	0	0	0		Out of focus. Video is dark
t9	2	1	1	0		Out of focus. Video is dark
t9	2	2	1	0		Out of focus. Video is dark
t9	2	3	0	1		Out of focus. Video is dark
t9	2	4	0	1		Out of focus. Video is dark
t9	2	5	0	1		Out of focus. Video is dark
t9	2	6	0	1		Out of focus. Video is dark
t9	2	7	0	1		Out of focus. Video is dark
t9	2	8	0	1		Out of focus. Video is dark
t9	2	9	0	1		Out of focus. Video is dark
t9	2	10	0	1		Out of focus. Video is dark
t9	2	11	0	1		Out of focus. Video is dark
t9	2	12	0	1	eating	Out of focus. Video is dark
t9	2	13	0	1	eating	Out of focus. Video is dark
t9	2	14	0	1	eating	Out of focus. Video is dark
t9	2	15	0	1	eating	Out of focus. Video is dark
t9	2	16	0	1	eating	Out of focus. Video is dark
t9	2	17	0	1	eating	Out of focus. Video is dark
t9	2	18	0	1	eating	Out of focus. Video is dark
t9	3	0	0	0		Out of focus. Video is dark
t9	3	1	0	0		Out of focus. Video is dark
t9	3	2	0	0		Out of focus. Video is dark
t9	3	3	1	0		Out of focus. Video is dark
t9	3	4	1	0		Out of focus. Video is dark
t9	3	5	1	0		Out of focus. Video is dark
t9	3	6	1	0		Out of focus. Video is dark
t9	3	7	1	0		Out of focus. Video is dark
t9	3	8	1	0		Out of focus. Video is dark
t9	3	9	1	0		Out of focus. Video is dark
t9	3	10	1	0		Out of focus. Video is dark
t9	3	11	1	0		Out of focus. Video is dark
t9	3	12	0	1		Out of focus. Video is dark
t9	3	13	0	1	eating	Out of focus. Video is dark
t9	3	14	0	1	eating	Out of focus. Video is dark
t9	3	15	0	1	eating	Out of focus. Video is dark
t9	3	16	0	1	eating	Out of focus. Video is dark
t9	3	17	0	1	eating	Out of focus. Video is dark
t9	3	18	0	1	eating	Out of focus. Video is dark
t9	4	0	0	0		Out of focus. Video is dark
t9	4	1	0	0		Out of focus. Video is dark
t9	4	2	0	0		Out of focus. Video is dark
t9	4	3	1	0		Out of focus. Video is dark
t9	4	4	1	0		Out of focus. Video is dark
t9	4	5	1	0		Out of focus. Video is dark
t9	4	6	1	0		Out of focus. Video is dark
t9	4	7	0	1		Out of focus. Video is dark
t9	4	8	0	1		Out of focus. Video is dark
t9	4	9	0	1		Out of focus. Video is dark
t9	4	10	0	1		Out of focus. Video is dark
t9	4	11	0	1	eating	Out of focus. Video is dark
t9	4	12	0	1	eating	Out of focus. Video is dark
t9	4	13	0	1	eating	Out of focus. Video is dark
t9	4	14	0	1	eating	Out of focus. Video is dark
t9	4	15	0	1	eating	Out of focus. Video is dark
t9	4	16	0	1	eating	Out of focus. Video is dark
t9	4	17	0	1	eating	Out of focus. Video is dark
t9	4	18	0	1	eating	Out of focus. Video is dark
t9	5	0	1	0		Out of focus. Video is dark
t9	5	1	0	0		Out of focus. Video is dark
t9	5	2	1	0		Out of focus. Video is dark
t9	5	3	0	1	fish is within .5 cm from surface, but has displacement	Out of focus. Video is dark
t9	5	4	0	1		Out of focus. Video is dark
t9	5	5	0	1		Out of focus. Video is dark
t9	5	6	0	1		Out of focus. Video is dark
t9	5	7	0	1		Out of focus. Video is dark
t9	5	8	0	1		Out of focus. Video is dark
t9	5	9	0	1		Out of focus. Video is dark
t9	5	10	0	1		Out of focus. Video is dark
t9	5	11	0	1	eating	Out of focus. Video is dark
t9	5	12	0	1	eating	Out of focus. Video is dark
t9	5	13	0	1	eating	Out of focus. Video is dark
t9	5	14	0	1	eating	Out of focus. Video is dark
t9	5	15	0	1	eating	Out of focus. Video is dark
t9	5	16	0	1	eating	Out of focus. Video is dark
t9	5	17	0	1	eating	Out of focus. Video is dark
t9	5	18	0	1	eating	Out of focus. Video is dark
t9	6	0	0	0		Out of focus. Video is dark
t9	6	1	0	0		Out of focus. Video is dark
t9	6	2	1	0		Out of focus. Video is dark
t9	6	3	1	0		Out of focus. Video is dark
t9	6	4	0	1		Out of focus. Video is dark
t9	6	5	0	1		Out of focus. Video is dark
t9	6	6	0	1		Out of focus. Video is dark
t9	6	7	0	1		Out of focus. Video is dark
t9	6	8	0	1		Out of focus. Video is dark
t9	6	9	0	1		Out of focus. Video is dark
t9	6	10	0	1		Out of focus. Video is dark
t9	6	11	0	1	eating	Out of focus. Video is dark
t9	6	12	0	1	eating	Out of focus. Video is dark
t9	6	13	0	1	eating	Out of focus. Video is dark
t9	6	14	0	1	eating	Out of focus. Video is dark
t9	6	15	0	1	eating	Out of focus. Video is dark
t9	6	16	0	0	eating	Out of focus. Video is dark
t9	6	17	0	0	eating	Out of focus. Video is dark
t9	6	18	0	0	eating	Out of focus. Video is dark
t9	7	0	1	0	Fish is at the back of the tank	Out of focus. Video is dark
t9	7	1	0	0	Fish is at the back of the tank	Out of focus. Video is dark
t9	7	2	0	0	Fish is at the back of the tank	Out of focus. Video is dark
t9	7	3	1	0	Fish is at the back of the tank	Out of focus. Video is dark
t9	7	4	1	0	Fish is at the back of the tank	Out of focus. Video is dark
t9	7	5	1	0	Fish is at the back of the tank	Out of focus. Video is dark
t9	7	6	0	0	Fish is at the back of the tank	Out of focus. Video is dark
t9	7	7	0	0	Fish is at the back of the tank	Out of focus. Video is dark
t9	7	8	0	0	Fish is at the back of the tank	Out of focus. Video is dark
t9	7	9	1	0	Fish is at the back of the tank	Out of focus. Video is dark
t9	7	10	1	0	Fish is at the back of the tank	Out of focus. Video is dark
t9	7	11	0	0	Fish is at the back of the tank	Out of focus. Video is dark
t9	7	12	0	0	Fish is at the back of the tank	Out of focus. Video is dark
t9	7	13	1	0	Fish is at the back of the tank	Out of focus. Video is dark
t9	7	14	0	0	Fish is at the back of the tank	Out of focus. Video is dark
t9	7	15	1	0	Fish is at the back of the tank	Out of focus. Video is dark
t9	7	16	1	0	Fish is at the back of the tank	Out of focus. Video is dark
t9	7	17	1	0	Fish is at the back of the tank	Out of focus. Video is dark
t9	7	18	1	0	Fish is at the back of the tank	Out of focus. Video is dark
t9	8	0	0	0		Out of focus. Video is dark
t9	8	1	0	0		Out of focus. Video is dark
t9	8	2	1	0		Out of focus. Video is dark
t9	8	3	1	0		Out of focus. Video is dark
t9	8	4	1	0		Out of focus. Video is dark
t9	8	5	1	0		Out of focus. Video is dark
t9	8	6	0	1		Out of focus. Video is dark
t9	8	7	0	1		Out of focus. Video is dark
t9	8	8	0	1		Out of focus. Video is dark
t9	8	9	0	1		Out of focus. Video is dark
t9	8	10	0	1		Out of focus. Video is dark
t9	8	11	0	1	eating	Out of focus. Video is dark
t9	8	12	0	1	eating	Out of focus. Video is dark
t9	8	13	0	1	eating	Out of focus. Video is dark
t9	8	14	0	1	eating	Out of focus. Video is dark
t9	8	15	0	1	eating	Out of focus. Video is dark
t9	8	16	0	0	eating	Out of focus. Video is dark
t9	8	17	0	0	eating	Out of focus. Video is dark
t9	8	18	1	0	eating	Out of focus. Video is dark
t9	9	0	0	0		Out of focus. Video is dark
t9	9	1	1	0		Out of focus. Video is dark
t9	9	2	1	0		Out of focus. Video is dark
t9	9	3	1	0		Out of focus. Video is dark
t9	9	4	1	0		Out of focus. Video is dark
t9	9	5	1	0		Out of focus. Video is dark
t9	9	6	0	1		Out of focus. Video is dark
t9	9	7	0	1		Out of focus. Video is dark
t9	9	8	0	1		Out of focus. Video is dark
t9	9	9	0	1		Out of focus. Video is dark
t9	9	10	0	1		Out of focus. Video is dark
t9	9	11	0	1	eating	Out of focus. Video is dark
t9	9	12	0	1	eating	Out of focus. Video is dark
t9	9	13	0	1	eating	Out of focus. Video is dark
t9	9	14	0	1	eating	Out of focus. Video is dark
t9	9	15	0	1	eating	Out of focus. Video is dark
t9	9	16	0	1	eating	Out of focus. Video is dark
t9	9	17	0	1	eating	Out of focus. Video is dark
t9	9	18	0	1	eating	Out of focus. Video is dark
t9	10	0	0	0		Out of focus. Video is dark
t9	10	1	0	0		Out of focus. Video is dark
t9	10	2	1	0		Out of focus. Video is dark
t9	10	3	1	0		Out of focus. Video is dark
t9	10	4	0	1		Out of focus. Video is dark
t9	10	5	0	1		Out of focus. Video is dark
t9	10	6	0	1		Out of focus. Video is dark
t9	10	7	0	1		Out of focus. Video is dark
t9	10	8	0	1		Out of focus. Video is dark
t9	10	9	0	1		Out of focus. Video is dark
t9	10	10	0	1		Out of focus. Video is dark
t9	10	11	0	1		Out of focus. Video is dark
t9	10	12	0	1	eating	Out of focus. Video is dark
t9	10	13	0	1	eating	Out of focus. Video is dark
t9	10	14	0	1	eating	Out of focus. Video is dark
t9	10	15	0	1	eating	Out of focus. Video is dark
t9	10	16	0	1	eating	Out of focus. Video is dark
t9	10	17	0	1	eating	Out of focus. Video is dark
t9	10	18	0	0	eating	Out of focus. Video is dark
t9	11	0	1	0		Out of focus. Video is dark
t9	11	1	1	0		Out of focus. Video is dark
t9	11	2	1	0		Out of focus. Video is dark
t9	11	3	1	0		Out of focus. Video is dark
t9	11	4	0	1		Out of focus. Video is dark
t9	11	5	0	1		Out of focus. Video is dark
t9	11	6	0	1		Out of focus. Video is dark
t9	11	7	0	1		Out of focus. Video is dark
t9	11	8	0	1		Out of focus. Video is dark
t9	11	9	0	1		Out of focus. Video is dark
t9	11	10	0	1		Out of focus. Video is dark
t9	11	11	0	1		Out of focus. Video is dark
t9	11	12	0	1		Out of focus. Video is dark
t9	11	13	0	1		Out of focus. Video is dark
t9	11	14	0	1		Out of focus. Video is dark
t9	11	15	0	1		Out of focus. Video is dark
t9	11	16	0	1	eating	Out of focus. Video is dark
t9	11	17	0	1	eating	Out of focus. Video is dark
t9	11	18	0	0	eating	Out of focus. Video is dark
t9	12	0	0	0	within 2 cm from surface	Out of focus. Video is dark
t9	12	1	0	0	within 2 cm from surface	Out of focus. Video is dark
t9	12	2	1	0		Out of focus. Video is dark
t9	12	3	0	1		Out of focus. Video is dark
t9	12	4	0	1		Out of focus. Video is dark
t9	12	5	0	1		Out of focus. Video is dark
t9	12	6	0	1		Out of focus. Video is dark
t9	12	7	0	1		Out of focus. Video is dark
t9	12	8	0	1		Out of focus. Video is dark
t9	12	9	0	1		Out of focus. Video is dark
t9	12	10	0	1		Out of focus. Video is dark
t9	12	11	0	1		Out of focus. Video is dark
t9	12	12	0	1	eating	Out of focus. Video is dark
t9	12	13	0	1	eating	Out of focus. Video is dark
t9	12	14	0	1	eating	Out of focus. Video is dark
t9	12	15	0	1	eating	Out of focus. Video is dark
t9	12	16	0	0	eating	Out of focus. Video is dark
t9	12	17	0	0	eating	Out of focus. Video is dark
t9	12	18	0	0	eating	Out of focus. Video is dark
t9	13	0	0	0		Out of focus. Video is dark
t9	13	1	0	0		Out of focus. Video is dark
t9	13	2	1	0		Out of focus. Video is dark
t9	13	3	1	0		Out of focus. Video is dark
t9	13	4	1	0		Out of focus. Video is dark
t9	13	5	0	1		Out of focus. Video is dark
t9	13	6	0	1		Out of focus. Video is dark
t9	13	7	0	1		Out of focus. Video is dark
t9	13	8	0	1		Out of focus. Video is dark
t9	13	9	0	1		Out of focus. Video is dark
t9	13	10	0	1		Out of focus. Video is dark
t9	13	11	0	1	eating	Out of focus. Video is dark
t9	13	12	0	1		Out of focus. Video is dark
t9	13	13	0	0		Out of focus. Video is dark
t9	13	14	0	0		Out of focus. Video is dark
t9	13	15	0	0		Out of focus. Video is dark
t9	13	16	1	0		Out of focus. Video is dark
t9	13	17	1	0		Out of focus. Video is dark
t9	13	18	1	0		Out of focus. Video is dark
t9	14	0	0	0		Out of focus. Video is dark
t9	14	1	0	0		Out of focus. Video is dark
t9	14	2	0	0		Out of focus. Video is dark
t9	14	3	0	0		Out of focus. Video is dark
t9	14	4	0	0		Out of focus. Video is dark
t9	14	5	1	0		Out of focus. Video is dark
t9	14	6	0	1		Out of focus. Video is dark
t9	14	7	0	0		Out of focus. Video is dark
t9	14	8	0	0		Out of focus. Video is dark
t9	14	9	1	0		Out of focus. Video is dark
t9	14	10	1	0		Out of focus. Video is dark
t9	14	11	1	0		Out of focus. Video is dark
t9	14	12	0	1	fish out of view but I think it is at surface	fish out of view but probably at surface. Out of focus. Video is dark
t9	14	13	0	1		Out of focus. Video is dark
t9	14	14	0	1		Out of focus. Video is dark
t9	14	15	0	1		Out of focus. Video is dark
t9	14	16	0	1		Out of focus. Video is dark
t9	14	17	0	0		Out of focus. Video is dark
t9	14	18	1	0		Out of focus. Video is dark
t9	15	0	0	0		Out of focus. Video is dark
t9	15	1	0	0		Out of focus. Video is dark
t9	15	2	1	0		Out of focus. Video is dark
t9	15	3	1	0		Out of focus. Video is dark
t9	15	4	1	0		Out of focus. Video is dark
t9	15	5	1	0		Out of focus. Video is dark
t9	15	6	0	1		Out of focus. Video is dark
t9	15	7	0	1		Out of focus. Video is dark
t9	15	8	0	1		Out of focus. Video is dark
t9	15	9	0	1		Out of focus. Video is dark
t9	15	10	0	1		Out of focus. Video is dark
t9	15	11	0	1		Out of focus. Video is dark
t9	15	12	0	1	eating	Out of focus. Video is dark
t9	15	13	0	1	eating	Out of focus. Video is dark
t9	15	14	0	1	eating	Out of focus. Video is dark
t9	15	15	0	1	eating	Out of focus. Video is dark
t9	15	16	0	1	eating	Out of focus. Video is dark
t9	15	17	0	1	eating	Out of focus. Video is dark
t9	15	18	0	1	eating	Out of focus. Video is dark
t9	16	0	1	0	within 2 cm from surface	Out of focus. Video is dark
t9	16	1	0	0		Out of focus. Video is dark
t9	16	2	1	0		Out of focus. Video is dark
t9	16	3	1	0		Out of focus. Video is dark
t9	16	4	0	1		Out of focus. Video is dark
t9	16	5	0	1		Out of focus. Video is dark
t9	16	6	0	1		Out of focus. Video is dark
t9	16	7	0	1		Out of focus. Video is dark
t9	16	8	0	1		Out of focus. Video is dark
t9	16	9	0	1		Out of focus. Video is dark
t9	16	10	0	1		Out of focus. Video is dark
t9	16	11	0	1		Out of focus. Video is dark
t9	16	12	0	1	eating	Out of focus. Video is dark
t9	16	13	0	0		Out of focus. Video is dark
t9	16	14	1	0		Out of focus. Video is dark
t9	16	15	1	0		Out of focus. Video is dark
t9	16	16	1	0		Out of focus. Video is dark
t9	16	17	1	0		Out of focus. Video is dark
t9	16	18	1	0		Out of focus. Video is dark
t9	17	0	1	0		Out of focus. Video is dark
t9	17	1	1	0		Out of focus. Video is dark
t9	17	2	1	0		Out of focus. Video is dark
t9	17	3	1	0		Out of focus. Video is dark
t9	17	4	1	0		Out of focus. Video is dark
t9	17	5	1	0		Out of focus. Video is dark
t9	17	6	1	0		Out of focus. Video is dark
t9	17	7	1	0		Out of focus. Video is dark
t9	17	8	1	0		Out of focus. Video is dark
t9	17	9	0	1		Out of focus. Video is dark
t9	17	10	0	1		Out of focus. Video is dark
t9	17	11	0	0	trying to eat, but seems to be blocked by water stream	Out of focus. Video is dark
t9	17	12	1	0	trying to eat, but seems to be blocked by water stream	Out of focus. Video is dark
t9	17	13	0	0	trying to eat, but seems to be blocked by water stream	Out of focus. Video is dark
t9	17	14	0	0	trying to eat, but seems to be blocked by water stream	Out of focus. Video is dark
t9	17	15	1	0	trying to eat, but seems to be blocked by water stream	Out of focus. Video is dark
t9	17	16	1	0	trying to eat, but seems to be blocked by water stream	Out of focus. Video is dark
t9	17	17	0	1	trying to eat, but seems to be blocked by water stream	Out of focus. Video is dark
t9	17	18	0	1	trying to eat, but seems to be blocked by water stream. Ultimately eats at 20 sec	Out of focus. Video is dark
t9	18	0	0	0	sees food but doesn't eat	Out of focus. Video is dark
t9	18	1	0	0		Out of focus. Video is dark
t9	18	2	1	0		Out of focus. Video is dark
t9	18	3	0	0		Out of focus. Video is dark
t9	18	4	0	0		Out of focus. Video is dark
t9	18	5	1	0		Out of focus. Video is dark
t9	18	6	1	0		Out of focus. Video is dark
t9	18	7	1	0		Out of focus. Video is dark
t9	18	8	1	0		Out of focus. Video is dark
t9	18	9	1	0		Out of focus. Video is dark
t9	18	10	1	0		Out of focus. Video is dark
t9	18	11	0	0		Out of focus. Video is dark
t9	18	12	0	0		Out of focus. Video is dark
t9	18	13	1	0		Out of focus. Video is dark
t9	18	14	1	0		Out of focus. Video is dark
t9	18	15	1	0		Out of focus. Video is dark
t9	18	16	0	0	Fish turns around	Out of focus. Video is dark
t9	18	17	0	0		Out of focus. Video is dark
t9	18	18	0	0		Out of focus. Video is dark
t9	19	0	0	0		Out of focus. Video is dark
t9	19	1	1	0		Out of focus. Video is dark
t9	19	2	1	0		Out of focus. Video is dark
t9	19	3	1	0		Out of focus. Video is dark
t9	19	4	1	0		Out of focus. Video is dark
t9	19	5	1	0		Out of focus. Video is dark
t9	19	6	0	1		Out of focus. Video is dark
t9	19	7	0	0		Out of focus. Video is dark
t9	19	8	1	0		Out of focus. Video is dark
t9	19	9	0	1		Out of focus. Video is dark
t9	19	10	1	0		Out of focus. Video is dark
t9	19	11	0	1	eating	Out of focus. Video is dark
t9	19	12	0	1	eating	Out of focus. Video is dark
t9	19	13	0	1	eating	Out of focus. Video is dark
t9	19	14	0	1	eating	Out of focus. Video is dark
t9	19	15	0	1	eating	Out of focus. Video is dark
t9	19	16	0	1	eating	Out of focus. Video is dark
t9	19	17	0	1	eating	Out of focus. Video is dark
t9	19	18	0	1	eating	Out of focus. Video is dark
t9	20	0	0	0		Out of focus. Video is dark
t9	20	1	0	0		Out of focus. Video is dark
t9	20	2	1	0		Out of focus. Video is dark
t9	20	3	1	0		Out of focus. Video is dark
t9	20	4	1	0		Out of focus. Video is dark
t9	20	5	0	1		Out of focus. Video is dark
t9	20	6	0	1		Out of focus. Video is dark
t9	20	7	0	1		Out of focus. Video is dark
t9	20	8	0	1		Out of focus. Video is dark
t9	20	9	0	1		Out of focus. Video is dark
t9	20	10	0	1		Out of focus. Video is dark
t9	20	11	0	1	eating	Out of focus. Video is dark
t9	20	12	0	1	eating	Out of focus. Video is dark
t9	20	13	0	1	eating	Out of focus. Video is dark
t9	20	14	0	1	eating	Out of focus. Video is dark
t9	20	15	0	1	eating	Out of focus. Video is dark
t9	20	16	0	1	eating	Out of focus. Video is dark
t9	20	17	0	1	eating	Out of focus. Video is dark
t9	20	18	0	1	eating	Out of focus. Video is dark
t9	21	0	0	0		Out of focus. Video is dark
t9	21	1	1	0		Out of focus. Video is dark
t9	21	2	0	0		Out of focus. Video is dark
t9	21	3	0	0		Out of focus. Video is dark
t9	21	4	0	0		Out of focus. Video is dark
t9	21	5	0	0		Out of focus. Video is dark
t9	21	6	0	0		Out of focus. Video is dark
t9	21	7	0	0		Out of focus. Video is dark
t9	21	8	0	0		Out of focus. Video is dark
t9	21	9	0	0		Out of focus. Video is dark
t9	21	10	1	0		Out of focus. Video is dark
t9	21	11	1	0		Out of focus. Video is dark
t9	21	12	1	0		Out of focus. Video is dark
t9	21	13	1	0		Out of focus. Video is dark
t9	21	14	1	0		Out of focus. Video is dark
t9	21	15	1	0		Out of focus. Video is dark
t9	21	16	1	0		Out of focus. Video is dark
t9	21	17	1	0		Out of focus. Video is dark
t9	21	18	0	0		Out of focus. Video is dark

## Sheet: Fish_11
Animal ID (WT)	Video #	Second #	Animal Moving Upward? (any displacement toward the light's direction, inferred from the position the next second) (1 = yes; 0 = no)	Animal at Surface? (1 = yes; 0 = no)	Behavior Notes	Video Quality Notes	Other notes
t11	0	0	0	0	Fish at the bottom of the tank	Out of focus. Video is very dark	Can't validate food drop
t11	0	1	0	0	Fish at the bottom of the tank	Out of focus. Video is very dark	Can't validate food drop
t11	0	2	0	0	Fish at the bottom of the tank	Out of focus. Video is very dark	Can't validate food drop
t11	0	3	0	0	Fish at the bottom of the tank	Out of focus. Video is very dark	Can't validate food drop
t11	0	4	0	0	Fish at the bottom of the tank	Out of focus. Video is very dark	Can't validate food drop
t11	0	5	0	0	Fish at the bottom of the tank	Out of focus. Video is very dark	Can't validate food drop
t11	0	6	0	0	Fish at the bottom of the tank	Out of focus. Video is very dark	Can't validate food drop
t11	0	7	0	0	Fish at the bottom of the tank	Out of focus. Video is very dark	Can't validate food drop
t11	0	8	0	0	Fish at the bottom of the tank	Out of focus. Video is very dark	Can't validate food drop
t11	0	9	0	0	Fish at the bottom of the tank	Out of focus. Video is very dark	Can't validate food drop
t11	0	10	0	0	Fish at the bottom of the tank	Out of focus. Video is very dark	Can't validate food drop
t11	0	11	0	0	Fish at the bottom of the tank	Out of focus. Video is very dark	Can't validate food drop
t11	0	12	0	0	Fish at the bottom of the tank	Out of focus. Video is very dark	Can't validate food drop
t11	0	13	0	0	Fish at the bottom of the tank	Out of focus. Video is very dark	Can't validate food drop
t11	0	14	0	0	Fish at the bottom of the tank	Out of focus. Video is very dark	Can't validate food drop
t11	0	15	0	0	Fish at the bottom of the tank	Out of focus. Video is very dark	Can't validate food drop
t11	0	16	0	0	Fish at the bottom of the tank	Out of focus. Video is very dark	Can't validate food drop
t11	0	17	0	0	Fish at the bottom of the tank	Out of focus. Video is very dark	Can't validate food drop
t11	0	18	0	0	Fish at the bottom of the tank	Out of focus. Video is very dark	Can't validate food drop
t11	1	0	0	1	within 1 cm from the surface	Out of focus. Video is dark	Can't validate food drop
t11	1	1	0	0		Out of focus. Video is dark	Can't validate food drop
t11	1	2	0	0	Fish at the bottom quarter of the tank	Out of focus. Video is dark	Can't validate food drop
t11	1	3	0	0	Fish at the bottom quarter of the tank	Out of focus. Video is dark	Can't validate food drop
t11	1	4	0	0	Fish at the bottom quarter of the tank	Out of focus. Video is dark	Can't validate food drop
t11	1	5	0	0	Fish at the bottom quarter of the tank	Out of focus. Video is dark	Can't validate food drop
t11	1	6	0	0	Fish at the bottom quarter of the tank	Out of focus. Video is dark	Can't validate food drop
t11	1	7	0	0	Fish at the bottom quarter of the tank	Out of focus. Video is dark	Can't validate food drop
t11	1	8	0	0	Fish at the bottom quarter of the tank	Out of focus. Video is dark	Can't validate food drop
t11	1	9	0	0	Fish at the bottom quarter of the tank	Out of focus. Video is dark	Can't validate food drop
t11	1	10	0	0	Fish at the bottom quarter of the tank	Out of focus. Video is dark	Can't validate food drop
t11	1	11	0	0	Fish at the bottom quarter of the tank	Out of focus. Video is dark	Can't validate food drop
t11	1	12	0	0	Fish at the bottom quarter of the tank	Out of focus. Video is dark	Can't validate food drop
t11	1	13	0	0	Fish at the bottom quarter of the tank	Out of focus. Video is dark	Can't validate food drop
t11	1	14	0	0	Fish at the bottom quarter of the tank	Out of focus. Video is dark	Can't validate food drop
t11	1	15	0	0	Fish at the bottom quarter of the tank	Out of focus. Video is dark	Can't validate food drop
t11	1	16	0	0	Fish at the bottom quarter of the tank	Out of focus. Video is dark	Can't validate food drop
t11	1	17	0	0	Fish at the bottom quarter of the tank	Out of focus. Video is dark	Can't validate food drop
t11	1	18	0	0	Fish at the bottom quarter of the tank	Out of focus. Video is dark	Can't validate food drop
t11	2	0	0	0		Out of focus. Video is dark	Can't validate food drop
t11	2	1	0	0		Out of focus. Video is dark	Can't validate food drop
t11	2	2	0	0		Out of focus. Video is dark	Can't validate food drop
t11	2	3	0	0		Out of focus. Video is dark	Can't validate food drop
t11	2	4	1	0		Out of focus. Video is dark	Can't validate food drop
t11	2	5	1	0		Out of focus. Video is dark	Can't validate food drop
t11	2	6	1	0		Out of focus. Video is dark	Can't validate food drop
t11	2	7	1	0		Out of focus. Video is dark	Can't validate food drop
t11	2	8	1	0		Out of focus. Video is dark	Can't validate food drop
t11	2	9	1	0		Out of focus. Video is dark	Can't validate food drop
t11	2	10	1	0		Out of focus. Video is dark	Can't validate food drop
t11	2	11	1	0		Out of focus. Video is dark	Can't validate food drop
t11	2	12	1	0		Out of focus. Video is dark	Can't validate food drop
t11	2	13	1	0		Out of focus. Video is dark	Can't validate food drop
t11	2	14	1	0		Out of focus. Video is dark	Can't validate food drop
t11	2	15	0	0		Out of focus. Video is dark	Can't validate food drop
t11	2	16	1	0		Out of focus. Video is dark	Can't validate food drop
t11	2	17	1	0		Out of focus. Video is dark	Can't validate food drop
t11	2	18	1	0	ultimately reaches surface	Out of focus. Video is dark	Can't validate food drop
t11	3	0	1	0		Out of focus. Video is dark	Can't validate food drop
t11	3	1	1	0		Out of focus. Video is dark	Can't validate food drop
t11	3	2	1	0		Out of focus. Video is dark	Can't validate food drop
t11	3	3	1	0		Out of focus. Video is dark	Can't validate food drop
t11	3	4	0	0		Out of focus. Video is dark	Can't validate food drop
t11	3	5	1	0		Out of focus. Video is dark	Can't validate food drop
t11	3	6	1	0		Out of focus. Video is dark	Can't validate food drop
t11	3	7	1	0		Out of focus. Video is dark	Can't validate food drop
t11	3	8	1	0		Out of focus. Video is dark	Can't validate food drop
t11	3	9	0	1		Out of focus. Video is dark	Can't validate food drop
t11	3	10	0	1		Out of focus. Video is dark	Can't validate food drop
t11	3	11	0	1		Out of focus. Video is dark	Can't validate food drop
t11	3	12	0	1		Out of focus. Video is dark	Can't validate food drop
t11	3	13	0	1		Out of focus. Video is dark	Can't validate food drop
t11	3	14	0	1	eating?	Out of focus. Video is dark	Can't validate food drop
t11	3	15	0	1	eating?	Out of focus. Video is dark	Can't validate food drop
t11	3	16	0	1	eating?	Out of focus. Video is dark	Can't validate food drop
t11	3	17	0	1	eating?	Out of focus. Video is dark	Can't validate food drop
t11	3	18	0	1	eating?	Out of focus. Video is dark	Can't validate food drop
t11	4	0	0	0		Out of focus. Video is dark	Can't validate food drop
t11	4	1	0	0		Out of focus. Video is dark	Can't validate food drop
t11	4	2	0	0		Out of focus. Video is dark	Can't validate food drop
t11	4	3	0	0		Out of focus. Video is dark	Can't validate food drop
t11	4	4	0	0		Out of focus. Video is dark	Can't validate food drop
t11	4	5	0	0		Out of focus. Video is dark	Can't validate food drop
t11	4	6	0	0		Out of focus. Video is dark	Can't validate food drop
t11	4	7	0	0		Out of focus. Video is dark	Can't validate food drop
t11	4	8	0	0		Out of focus. Video is dark	Can't validate food drop
t11	4	9	0	0		Out of focus. Video is dark	Can't validate food drop
t11	4	10	1	0		Out of focus. Video is dark	Can't validate food drop
t11	4	11	1	0		Out of focus. Video is dark	Can't validate food drop
t11	4	12	1	0		Out of focus. Video is dark	Can't validate food drop
t11	4	13	1	0		Out of focus. Video is dark	Can't validate food drop
t11	4	14	1	0		Out of focus. Video is dark	Can't validate food drop
t11	4	15	1	0		Out of focus. Video is dark	Can't validate food drop
t11	4	16	1	0		Out of focus. Video is dark	Can't validate food drop
t11	4	17	1	0		Out of focus. Video is dark	Can't validate food drop
t11	4	18	0	1		Out of focus. Video is dark	Can't validate food drop
t11	5	0	1	0		Out of focus. Video is dark	Can't validate food drop
t11	5	1	1	0		Out of focus. Video is dark	Can't validate food drop
t11	5	2	0	0		Out of focus. Video is dark	Can't validate food drop
t11	5	3	1	0		Out of focus. Video is dark	Can't validate food drop
t11	5	4	1	0		Out of focus. Video is dark	Can't validate food drop
t11	5	5	1	0		Out of focus. Video is dark	Can't validate food drop
t11	5	6	1	0		Out of focus. Video is dark	Can't validate food drop
t11	5	7	1	0		Out of focus. Video is dark	Can't validate food drop
t11	5	8	1	0		Out of focus. Video is dark	Can't validate food drop
t11	5	9	1	0		Out of focus. Video is dark	Can't validate food drop
t11	5	10	1	0		Out of focus. Video is dark	Can't validate food drop
t11	5	11	1	0		Out of focus. Video is dark	Can't validate food drop
t11	5	12	1	0		Out of focus. Video is dark	Can't validate food drop
t11	5	13	1	0		Out of focus. Video is dark	Can't validate food drop
t11	5	14	1	0		Out of focus. Video is dark	Can't validate food drop
t11	5	15	1	0		Out of focus. Video is dark	Can't validate food drop
t11	5	16	0	1	eating?	Out of focus. Video is dark	Can't validate food drop
t11	5	17	0	1	eating?	Out of focus. Video is dark	Can't validate food drop
t11	5	18	0	1	eating?	Out of focus. Video is dark	Can't validate food drop
t11	6	0	0	0		Out of focus. Video is dark	Can't validate food drop
t11	6	1	1	0		Out of focus. Video is dark	Can't validate food drop
t11	6	2	1	0		Out of focus. Video is dark	Can't validate food drop
t11	6	3	1	0		Out of focus. Video is dark	Can't validate food drop
t11	6	4	1	0		Out of focus. Video is dark	Can't validate food drop
t11	6	5	1	0		Out of focus. Video is dark	Can't validate food drop
t11	6	6	1	0		Out of focus. Video is dark	Can't validate food drop
t11	6	7	1	0		Out of focus. Video is dark	Can't validate food drop
t11	6	8	0	1		Out of focus. Video is dark	Can't validate food drop
t11	6	9	0	1		Out of focus. Video is dark	Can't validate food drop
t11	6	10	0	1		Out of focus. Video is dark	Can't validate food drop
t11	6	11	0	1	eating?	Out of focus. Video is dark	Can't validate food drop
t11	6	12	0	1	eating?	Out of focus. Video is dark	Can't validate food drop
t11	6	13	0	1	eating?	Out of focus. Video is dark	Can't validate food drop
t11	6	14	0	1	eating?	Out of focus. Video is dark	Can't validate food drop
t11	6	15	0	1	eating?	Out of focus. Video is dark	Can't validate food drop
t11	6	16	0	1	eating?	Out of focus. Video is dark	Can't validate food drop
t11	6	17	0	1	eating?	Out of focus. Video is dark	Can't validate food drop
t11	6	18	0	1	eating?	Out of focus. Video is dark	Can't validate food drop
t11	7	0	1	0		Out of focus. Video is dark	Can't validate food drop
t11	7	1	1	0		Out of focus. Video is dark	Can't validate food drop
t11	7	2	0	0	Fish turns around	Out of focus. Video is dark	Can't validate food drop
t11	7	3	0	0		Out of focus. Video is dark	Can't validate food drop
t11	7	4	0	0		Out of focus. Video is dark	Can't validate food drop
t11	7	5	0	0		Out of focus. Video is dark	Can't validate food drop
t11	7	6	0	0		Out of focus. Video is dark	Can't validate food drop
t11	7	7	0	0		Out of focus. Video is dark	Can't validate food drop
t11	7	8	0	0		Out of focus. Video is dark	Can't validate food drop
t11	7	9	0	0		Out of focus. Video is dark	Can't validate food drop
t11	7	10	0	0		Out of focus. Video is dark	Can't validate food drop
t11	7	11	1	0		Out of focus. Video is dark	Can't validate food drop
t11	7	12	0	0		Out of focus. Video is dark	Can't validate food drop
t11	7	13	0	0		Out of focus. Video is dark	Can't validate food drop
t11	7	14	1	0		Out of focus. Video is dark	Can't validate food drop
t11	7	15	0	0		Out of focus. Video is dark	Can't validate food drop
t11	7	16	0	0		Out of focus. Video is dark	Can't validate food drop
t11	7	17	0	0		Out of focus. Video is dark	Can't validate food drop
t11	7	18	0	0		Out of focus. Video is dark	Can't validate food drop
t11	8	0	1	0		Out of focus. Video is dark	Can't validate food drop
t11	8	1	0	0		Out of focus. Video is dark	Can't validate food drop
t11	8	2	0	0		Out of focus. Video is dark	Can't validate food drop
t11	8	3	1	0		Out of focus. Video is dark	Can't validate food drop
t11	8	4	1	0		Out of focus. Video is dark	Can't validate food drop
t11	8	5	0	1		Out of focus. Video is dark	Can't validate food drop
t11	8	6	0	1		Out of focus. Video is dark	Can't validate food drop
t11	8	7	0	1		Out of focus. Video is dark	Can't validate food drop
t11	8	8	0	1		Out of focus. Video is dark	Can't validate food drop
t11	8	9	0	1		Out of focus. Video is dark	Can't validate food drop
t11	8	10	0	1		Out of focus. Video is dark	Can't validate food drop
t11	8	11	0	1		Out of focus. Video is dark	Can't validate food drop
t11	8	12	0	1	eating?	Out of focus. Video is dark	Can't validate food drop
t11	8	13	0	1	eating?	Out of focus. Video is dark	Can't validate food drop
t11	8	14	0	1	eating?	Out of focus. Video is dark	Can't validate food drop
t11	8	15	0	1	eating?	Out of focus. Video is dark	Can't validate food drop
t11	8	16	0	1	eating?	Out of focus. Video is dark	Can't validate food drop
t11	8	17	0	1	eating?	Out of focus. Video is dark	Can't validate food drop
t11	8	18	0	1	eating?	Out of focus. Video is dark	Can't validate food drop
t11	9	0	0	0	Fish in the back and bottom of the tank	Out of focus. Video is dark	Can't validate food drop
t11	9	1	1	0	Fish in the back and bottom of the tank	Out of focus. Video is dark	Can't validate food drop
t11	9	2	0	0	Fish in the back and bottom of the tank	Out of focus. Video is dark	Can't validate food drop
t11	9	3	0	0	Fish in the back and bottom of the tank	Out of focus. Video is dark	Can't validate food drop
t11	9	4	0	0	Fish in the back and bottom of the tank	Out of focus. Video is dark	Can't validate food drop
t11	9	5	0	0	Fish in the back and bottom of the tank	Out of focus. Video is dark	Can't validate food drop
t11	9	6	0	0	Fish in the back and bottom of the tank	Out of focus. Video is dark	Can't validate food drop
t11	9	7	0	0	Fish in the back and bottom of the tank	Out of focus. Video is dark	Can't validate food drop
t11	9	8	0	0	Fish in the back and bottom of the tank	Out of focus. Video is dark	Can't validate food drop
t11	9	9	0	0	Fish in the back and bottom of the tank	Out of focus. Video is dark	Can't validate food drop
t11	9	10	0	0	Fish in the back and bottom of the tank	Out of focus. Video is dark	Can't validate food drop
t11	9	11	0	0	Fish in the back and bottom of the tank	Out of focus. Video is dark	Can't validate food drop
t11	9	12	0	0	Fish in the back and bottom of the tank	Out of focus. Video is dark	Can't validate food drop
t11	9	13	0	0	Fish in the back and bottom of the tank	Out of focus. Video is dark	Can't validate food drop
t11	9	14	0	0	Fish in the back and bottom of the tank	Out of focus. Video is dark	Can't validate food drop
t11	9	15	1	0		Out of focus. Video is dark	Can't validate food drop
t11	9	16	1	0		Out of focus. Video is dark	Can't validate food drop
t11	9	17	1	0		Out of focus. Video is dark	Can't validate food drop
t11	9	18	1	0		Out of focus. Video is dark	Can't validate food drop
t11	10	0	1	0		Out of focus. Video is dark	Can't validate food drop
t11	10	1	1	0		Out of focus. Video is dark	Can't validate food drop
t11	10	2	0	0		Out of focus. Video is dark	Can't validate food drop
t11	10	3	0	0		Out of focus. Video is dark	Can't validate food drop
t11	10	4	0	0		Out of focus. Video is dark	Can't validate food drop
t11	10	5	0	0		Out of focus. Video is dark	Can't validate food drop
t11	10	6	0	0		Out of focus. Video is dark	Can't validate food drop
t11	10	7	0	0		Out of focus. Video is dark	Can't validate food drop
t11	10	8	0	0		Out of focus. Video is dark	Can't validate food drop
t11	10	9	0	0		Out of focus. Video is dark	Can't validate food drop
t11	10	10	0	0		Out of focus. Video is dark	Can't validate food drop
t11	10	11	0	0		Out of focus. Video is dark	Can't validate food drop
t11	10	12	0	0		Out of focus. Video is dark	Can't validate food drop
t11	10	13	1	0		Out of focus. Video is dark	Can't validate food drop
t11	10	14	1	0		Out of focus. Video is dark	Can't validate food drop
t11	10	15	1	0		Out of focus. Video is dark	Can't validate food drop
t11	10	16	1	0		Out of focus. Video is dark	Can't validate food drop
t11	10	17	1	0		Out of focus. Video is dark	Can't validate food drop
t11	10	18	0	1	eating?	Out of focus. Video is dark	Can't validate food drop
t11	11	0	1	0		Out of focus. Video is dark	Can't validate food drop
t11	11	1	1	0		Out of focus. Video is dark	Can't validate food drop
t11	11	2	0	0		Out of focus. Video is dark	Can't validate food drop
t11	11	3	1	0		Out of focus. Video is dark	Can't validate food drop
t11	11	4	1	0		Out of focus. Video is dark	Can't validate food drop
t11	11	5	1	0		Out of focus. Video is dark	Can't validate food drop
t11	11	6	0	1		Out of focus. Video is dark	Can't validate food drop
t11	11	7	1	0		Out of focus. Video is dark	Can't validate food drop
t11	11	8	1	0		Out of focus. Video is dark	Can't validate food drop
t11	11	9	0	1	eating?	Out of focus. Video is dark	Can't validate food drop
t11	11	10	0	0		Out of focus. Video is dark	Can't validate food drop
t11	11	11	0	0		Out of focus. Video is dark	Can't validate food drop
t11	11	12	0	0		Out of focus. Video is dark	Can't validate food drop
t11	11	13	1	0		Out of focus. Video is dark	Can't validate food drop
t11	11	14	0	1		Out of focus. Video is dark	Can't validate food drop
t11	11	15	0	0		Out of focus. Video is dark	Can't validate food drop
t11	11	16	0	0		Out of focus. Video is dark	Can't validate food drop
t11	11	17	0	0		Out of focus. Video is dark	Can't validate food drop
t11	11	18	0	0		Out of focus. Video is dark	Can't validate food drop
t11	12	0	0	0	Fish at the bottom quarter of the tank	Out of focus. Video is dark	Can't validate food drop
t11	12	1	1	0	Fish at the bottom quarter of the tank	Out of focus. Video is dark	Can't validate food drop
t11	12	2	1	0	Fish at the bottom quarter of the tank	Out of focus. Video is dark	Can't validate food drop
t11	12	3	0	0	Fish at the bottom quarter of the tank	Out of focus. Video is dark	Can't validate food drop
t11	12	4	0	0	Fish at the bottom quarter of the tank	Out of focus. Video is dark	Can't validate food drop
t11	12	5	0	0	Fish at the bottom quarter of the tank	Out of focus. Video is dark	Can't validate food drop
t11	12	6	0	0	Fish at the bottom quarter of the tank	Out of focus. Video is dark	Can't validate food drop
t11	12	7	0	0	Fish at the bottom quarter of the tank	Out of focus. Video is dark	Can't validate food drop
t11	12	8	0	0	Fish at the bottom quarter of the tank	Out of focus. Video is dark	Can't validate food drop
t11	12	9	0	0	Fish at the bottom quarter of the tank	Out of focus. Video is dark	Can't validate food drop
t11	12	10	0	0	Fish at the bottom quarter of the tank	Out of focus. Video is dark	Can't validate food drop
t11	12	11	0	0	Fish at the bottom quarter of the tank	Out of focus. Video is dark	Can't validate food drop
t11	12	12	0	0	Fish at the bottom quarter of the tank	Out of focus. Video is dark	Can't validate food drop
t11	12	13	0	0	Fish at the bottom quarter of the tank	Out of focus. Video is dark	Can't validate food drop
t11	12	14	0	0	Fish at the bottom quarter of the tank	Out of focus. Video is dark	Can't validate food drop
t11	12	15	0	0	Fish at the bottom quarter of the tank	Out of focus. Video is dark	Can't validate food drop
t11	12	16	1	0	Fish at the bottom quarter of the tank	Out of focus. Video is dark	Can't validate food drop
t11	12	17	1	0	Fish at the bottom quarter of the tank	Out of focus. Video is dark	Can't validate food drop
t11	12	18	1	0	Fish at the bottom quarter of the tank	Out of focus. Video is dark	Can't validate food drop
t11	13	0	0	0		Out of focus. Video is dark	Can't validate food drop
t11	13	1	0	0		Out of focus. Video is dark	Can't validate food drop
t11	13	2	1	0		Out of focus. Video is dark	Can't validate food drop
t11	13	3	1	0		Out of focus. Video is dark	Can't validate food drop
t11	13	4	1	0		Out of focus. Video is dark	Can't validate food drop
t11	13	5	1	0		Out of focus. Video is dark	Can't validate food drop
t11	13	6	1	0		Out of focus. Video is dark	Can't validate food drop
t11	13	7	1	0		Out of focus. Video is dark	Can't validate food drop
t11	13	8	1	0		Out of focus. Video is dark	Can't validate food drop
t11	13	9	1	0		Out of focus. Video is dark	Can't validate food drop
t11	13	10	1	0		Out of focus. Video is dark	Can't validate food drop
t11	13	11	1	0		Out of focus. Video is dark	Can't validate food drop
t11	13	12	0	1		Out of focus. Video is dark	Can't validate food drop
t11	13	13	1	0		Out of focus. Video is dark	Can't validate food drop
t11	13	14	0	1		Out of focus. Video is dark	Can't validate food drop
t11	13	15	0	0		Out of focus. Video is dark	Can't validate food drop
t11	13	16	1	0		Out of focus. Video is dark	Can't validate food drop
t11	13	17	1	0		Out of focus. Video is dark	Can't validate food drop
t11	13	18	0	1		Out of focus. Video is dark	Can't validate food drop
t11	14	0	0	0	Fish at the bottom of the tank	Out of focus. Video is dark	Can't validate food drop
t11	14	1	0	0	Fish at the bottom of the tank	Out of focus. Video is dark	Can't validate food drop
t11	14	2	0	0	Fish at the bottom of the tank	Out of focus. Video is dark	Can't validate food drop
t11	14	3	0	0	Fish at the bottom of the tank	Out of focus. Video is dark	Can't validate food drop
t11	14	4	0	0	Fish at the bottom of the tank	Out of focus. Video is dark	Can't validate food drop
t11	14	5	0	0	Fish at the bottom of the tank	Out of focus. Video is dark	Can't validate food drop
t11	14	6	0	0	Fish at the bottom of the tank	Out of focus. Video is dark	Can't validate food drop
t11	14	7	0	0	Fish at the bottom of the tank	Out of focus. Video is dark	Can't validate food drop
t11	14	8	0	0	Fish at the bottom of the tank	Out of focus. Video is dark	Can't validate food drop
t11	14	9	0	0	Fish at the bottom of the tank	Out of focus. Video is dark	Can't validate food drop
t11	14	10	0	0	Fish at the bottom of the tank	Out of focus. Video is dark	Can't validate food drop
t11	14	11	0	0	Fish at the bottom of the tank	Out of focus. Video is dark	Can't validate food drop
t11	14	12	0	0	Fish at the bottom of the tank	Out of focus. Video is dark	Can't validate food drop
t11	14	13	0	0	Fish at the bottom of the tank	Out of focus. Video is dark	Can't validate food drop
t11	14	14	0	0	Fish at the bottom of the tank	Out of focus. Video is dark	Can't validate food drop
t11	14	15	0	0	Fish at the bottom of the tank	Out of focus. Video is dark	Can't validate food drop
t11	14	16	0	0	Fish at the bottom of the tank	Out of focus. Video is dark	Can't validate food drop
t11	14	17	0	0	Fish at the bottom of the tank	Out of focus. Video is dark	Can't validate food drop
t11	14	18	0	0	Fish at the bottom of the tank	Out of focus. Video is dark	Can't validate food drop
t11	15	0	0	0		Out of focus. Video is dark	Can't validate food drop
t11	15	1	0	0		Out of focus. Video is dark	Can't validate food drop
t11	15	2	0	0		Out of focus. Video is dark	Can't validate food drop
t11	15	3	0	0		Out of focus. Video is dark	Can't validate food drop
t11	15	4	0	0		Out of focus. Video is dark	Can't validate food drop
t11	15	5	0	0		Out of focus. Video is dark	Can't validate food drop
t11	15	6	0	0		Out of focus. Video is dark	Can't validate food drop
t11	15	7	1	0		Out of focus. Video is dark	Can't validate food drop
t11	15	8	1	0		Out of focus. Video is dark	Can't validate food drop
t11	15	9	0	0		Out of focus. Video is dark	Can't validate food drop
t11	15	10	1	0		Out of focus. Video is dark	Can't validate food drop
t11	15	11	0	0		Out of focus. Video is dark	Can't validate food drop
t11	15	12	1	0		Out of focus. Video is dark	Can't validate food drop
t11	15	13	1	0		Out of focus. Video is dark	Can't validate food drop
t11	15	14	1	0		Out of focus. Video is dark	Can't validate food drop
t11	15	15	1	0		Out of focus. Video is dark	Can't validate food drop
t11	15	16	0	0		Out of focus. Video is dark	Can't validate food drop
t11	15	17	0	0		Out of focus. Video is dark	Can't validate food drop
t11	15	18	1	0		Out of focus. Video is dark	Can't validate food drop
t11	16	0	0	0		Out of focus. Video is dark	Can't validate food drop
t11	16	1	1	0		Out of focus. Video is dark	Can't validate food drop
t11	16	2	0	0		Out of focus. Video is dark	Can't validate food drop
t11	16	3	1	0		Out of focus. Video is dark	Can't validate food drop
t11	16	4	1	0		Out of focus. Video is dark	Can't validate food drop
t11	16	5	1	0		Out of focus. Video is dark	Can't validate food drop
t11	16	6	0	0		Out of focus. Video is dark	Can't validate food drop
t11	16	7	0	0		Out of focus. Video is dark	Can't validate food drop
t11	16	8	1	0		Out of focus. Video is dark	Can't validate food drop
t11	16	9	0	0		Out of focus. Video is dark	Can't validate food drop
t11	16	10	0	0		Out of focus. Video is dark	Can't validate food drop
t11	16	11	0	0		Out of focus. Video is dark	Can't validate food drop
t11	16	12	0	0		Out of focus. Video is dark	Can't validate food drop
t11	16	13	0	0		Out of focus. Video is dark	Can't validate food drop
t11	16	14	0	0		Out of focus. Video is dark	Can't validate food drop
t11	16	15	0	0		Out of focus. Video is dark	Can't validate food drop
t11	16	16	0	0		Out of focus. Video is dark	Can't validate food drop
t11	16	17	1	0		Out of focus. Video is dark	Can't validate food drop
t11	16	18	1	0		Out of focus. Video is dark	Can't validate food drop
t11	17	0	1	0		Out of focus. Video is dark	Can't validate food drop
t11	17	1	0	0		Out of focus. Video is dark	Can't validate food drop
t11	17	2	1	0		Out of focus. Video is dark	Can't validate food drop
t11	17	3	1	0		Out of focus. Video is dark	Can't validate food drop
t11	17	4	1	0		Out of focus. Video is dark	Can't validate food drop
t11	17	5	1	0		Out of focus. Video is dark	Can't validate food drop
t11	17	6	1	0		Out of focus. Video is dark	Can't validate food drop
t11	17	7	0	1		Out of focus. Video is dark	Can't validate food drop
t11	17	8	0	1		Out of focus. Video is dark	Can't validate food drop
t11	17	9	0	1		Out of focus. Video is dark	Can't validate food drop
t11	17	10	0	1		Out of focus. Video is dark	Can't validate food drop
t11	17	11	0	1		Out of focus. Video is dark	Can't validate food drop
t11	17	12	0	1		Out of focus. Video is dark	Can't validate food drop
t11	17	13	0	1		Out of focus. Video is dark	Can't validate food drop
t11	17	14	0	1		Out of focus. Video is dark	Can't validate food drop
t11	17	15	0	1		Out of focus. Video is dark	Can't validate food drop
t11	17	16	0	1		Out of focus. Video is dark	Can't validate food drop
t11	17	17	0	0		Out of focus. Video is dark	Can't validate food drop
t11	17	18	1	0		Out of focus. Video is dark	Can't validate food drop
t11	18	0	1	0		Out of focus. Video is dark	Can't validate food drop
t11	18	1	1	0		Out of focus. Video is dark	Can't validate food drop
t11	18	2	1	0		Out of focus. Video is dark	Can't validate food drop
t11	18	3	1	0		Out of focus. Video is dark	Can't validate food drop
t11	18	4	0	1		Out of focus. Video is dark	Can't validate food drop
t11	18	5	0	1		Out of focus. Video is dark	Can't validate food drop
t11	18	6	0	1		Out of focus. Video is dark	Can't validate food drop
t11	18	7	0	1		Out of focus. Video is dark	Can't validate food drop
t11	18	8	0	1		Out of focus. Video is dark	Can't validate food drop
t11	18	9	0	1		Out of focus. Video is dark	Can't validate food drop
t11	18	10	0	1		Out of focus. Video is dark	Can't validate food drop
t11	18	11	0	1		Out of focus. Video is dark	Can't validate food drop
t11	18	12	0	1		Out of focus. Video is dark	Can't validate food drop
t11	18	13	0	1		Out of focus. Video is dark	Can't validate food drop
t11	18	14	0	1		Out of focus. Video is dark	Can't validate food drop
t11	18	15	0	1		Out of focus. Video is dark	Can't validate food drop
t11	18	16	0	1		Out of focus. Video is dark	Can't validate food drop
t11	18	17	0	0		Out of focus. Video is dark	Can't validate food drop
t11	18	18	0	0		Out of focus. Video is dark	Can't validate food drop
t11	19	0	0	0		Out of focus. Video is dark	Can't validate food drop
t11	19	1	0	0		Out of focus. Video is dark	Can't validate food drop
t11	19	2	0	0		Out of focus. Video is dark	Can't validate food drop
t11	19	3	0	0		Out of focus. Video is dark	Can't validate food drop
t11	19	4	0	0		Out of focus. Video is dark	Can't validate food drop
t11	19	5	1	0		Out of focus. Video is dark	Can't validate food drop
t11	19	6	1	0		Out of focus. Video is dark	Can't validate food drop
t11	19	7	1	0		Out of focus. Video is dark	Can't validate food drop
t11	19	8	1	0		Out of focus. Video is dark	Can't validate food drop
t11	19	9	1	0		Out of focus. Video is dark	Can't validate food drop
t11	19	10	1	0		Out of focus. Video is dark	Can't validate food drop
t11	19	11	0	1		Out of focus. Video is dark	Can't validate food drop
t11	19	12	0	1		Out of focus. Video is dark	Can't validate food drop
t11	19	13	0	0		Out of focus. Video is dark	Can't validate food drop
t11	19	14	1	0		Out of focus. Video is dark	Can't validate food drop
t11	19	15	0	1		Out of focus. Video is dark	Can't validate food drop
t11	19	16	0	1		Out of focus. Video is dark	Can't validate food drop
t11	19	17	0	1		Out of focus. Video is dark	Can't validate food drop
t11	19	18	0	0		Out of focus. Video is dark	Can't validate food drop
t11	20	0	0	1		Out of focus. Video is dark	Can't validate food drop
t11	20	1	0	1		Out of focus. Video is dark	Can't validate food drop
t11	20	2	0	1		Out of focus. Video is dark	Can't validate food drop
t11	20	3	0	1		Out of focus. Video is dark	Can't validate food drop
t11	20	4	0	1		Out of focus. Video is dark	Can't validate food drop
t11	20	5	0	1		Out of focus. Video is dark	Can't validate food drop
t11	20	6	0	1		Out of focus. Video is dark	Can't validate food drop
t11	20	7	0	1		Out of focus. Video is dark	Can't validate food drop
t11	20	8	0	0		Out of focus. Video is dark	Can't validate food drop
t11	20	9	0	0		Out of focus. Video is dark	Can't validate food drop
t11	20	10	0	0		Out of focus. Video is dark	Can't validate food drop
t11	20	11	0	0		Out of focus. Video is dark	Can't validate food drop
t11	20	12	0	0		Out of focus. Video is dark	Can't validate food drop
t11	20	13	1	0		Out of focus. Video is dark	Can't validate food drop
t11	20	14	0	1		Out of focus. Video is dark	Can't validate food drop
t11	20	15	0	1		Out of focus. Video is dark	Can't validate food drop
t11	20	16	0	1		Out of focus. Video is dark	Can't validate food drop
t11	20	17	0	1		Out of focus. Video is dark	Can't validate food drop
t11	20	18	0	1		Out of focus. Video is dark	Can't validate food drop
t11	21	0	0	0	Fish at the bottom of the tank	Out of focus. Video is dark	Can't validate food drop
t11	21	1	0	0	Fish at the bottom of the tank	Out of focus. Video is dark	Can't validate food drop
t11	21	2	0	0	Fish at the bottom of the tank	Out of focus. Video is dark	Can't validate food drop
t11	21	3	0	0	Fish at the bottom of the tank	Out of focus. Video is dark	Can't validate food drop
t11	21	4	0	0	Fish at the bottom of the tank	Out of focus. Video is dark	Can't validate food drop
t11	21	5	0	0	Fish at the bottom of the tank	Out of focus. Video is dark	Can't validate food drop
t11	21	6	0	0	Fish at the bottom of the tank	Out of focus. Video is dark	Can't validate food drop
t11	21	7	0	0	Fish at the bottom of the tank	Out of focus. Video is dark	Can't validate food drop
t11	21	8	0	0	Fish at the bottom of the tank	Out of focus. Video is dark	Can't validate food drop
t11	21	9	1	0	Fish at the bottom of the tank	Out of focus. Video is dark	Can't validate food drop
t11	21	10	1	0	Fish at the bottom of the tank	Out of focus. Video is dark	Can't validate food drop
t11	21	11	1	0	Fish at the bottom of the tank	Out of focus. Video is dark	Can't validate food drop
t11	21	12	1	0	Fish at the bottom of the tank	Out of focus. Video is dark	Can't validate food drop
t11	21	13	1	0	Fish at the bottom of the tank	Out of focus. Video is dark	Can't validate food drop
t11	21	14	1	0	Fish at the bottom of the tank	Out of focus. Video is dark	Can't validate food drop
t11	21	15	1	0	Fish at the bottom of the tank	Out of focus. Video is dark	Can't validate food drop
t11	21	16	1	0	Fish at the bottom of the tank	Out of focus. Video is dark	Can't validate food drop
t11	21	17	1	0	Fish at the bottom of the tank	Out of focus. Video is dark	Can't validate food drop
t11	21	18	0	0	Fish at the bottom of the tank	Out of focus. Video is dark	Can't validate food drop

## Sheet: Fish_19
Animal ID (WT)	Video #	Second #	Animal Moving Upward? (any displacement toward the light's direction, inferred from the position the next second) (1 = yes; 0 = no)	Animal at Surface? (1 = yes; 0 = no)	Behavior Notes	Video Quality Notes	Other notes
t19	0	0	0	0	Fish at the bottom of the tank	Out of focus. Video is very dark
t19	0	1	0	0	Fish at the bottom of the tank	Out of focus. Video is very dark
t19	0	2	0	0	Fish at the bottom of the tank	Out of focus. Video is very dark
t19	0	3	0	0	Fish at the bottom of the tank	Out of focus. Video is very dark
t19	0	4	0	0	Fish at the bottom of the tank	Out of focus. Video is very dark
t19	0	5	0	0	Fish at the bottom of the tank	Out of focus. Video is very dark
t19	0	6	0	0	Fish at the bottom of the tank	Out of focus. Video is very dark
t19	0	7	0	0	Fish at the bottom of the tank	Out of focus. Video is very dark
t19	0	8	0	0	Fish at the bottom of the tank	Out of focus. Video is very dark
t19	0	9	0	0	Fish at the bottom of the tank	Out of focus. Video is very dark
t19	0	10	0	0	Fish at the bottom of the tank	Out of focus. Video is very dark
t19	0	11	0	0	Fish at the bottom of the tank	Out of focus. Video is very dark
t19	0	12	0	0	Fish at the bottom of the tank	Out of focus. Video is very dark
t19	0	13	0	0	Fish at the bottom of the tank	Out of focus. Video is very dark
t19	0	14	0	0	Fish at the bottom of the tank	Out of focus. Video is very dark
t19	0	15	0	0	Fish at the bottom of the tank	Out of focus. Video is very dark
t19	0	16	0	0	Fish at the bottom of the tank	Out of focus. Video is very dark
t19	0	17	0	0	Fish at the bottom of the tank	Out of focus. Video is very dark
t19	0	18	0	0	Fish at the bottom of the tank	Out of focus. Video is very dark
t19	1	0	1	0		Out of focus. Video is very dark
t19	1	1	1	0		Out of focus. Video is very dark
t19	1	2	1	0		Out of focus. Video is very dark
t19	1	3	1	0		Out of focus. Video is very dark
t19	1	4	0	0		Out of focus. Video is very dark
t19	1	5	0	0		Out of focus. Video is very dark
t19	1	6	0	0		Out of focus. Video is very dark
t19	1	7	1	0		Out of focus. Video is very dark
t19	1	8	1	0		Out of focus. Video is very dark
t19	1	9	0	0		Out of focus. Video is very dark
t19	1	10	0	0		Out of focus. Video is very dark
t19	1	11	0	0		Out of focus. Video is very dark
t19	1	12	0	0		Out of focus. Video is very dark
t19	1	13	1	0		Out of focus. Video is very dark
t19	1	14	1	0		Out of focus. Video is very dark
t19	1	15	1	0		Out of focus. Video is very dark
t19	1	16	1	0		Out of focus. Video is very dark
t19	1	17	1	0		Out of focus. Video is very dark
t19	1	18	1	0	ultimately reaches surface and eating	Out of focus. Video is very dark
t19	2	0	1	0		Out of focus. Video is very dark
t19	2	1	1	0		Out of focus. Video is very dark
t19	2	2	0	0		Out of focus. Video is very dark
t19	2	3	0	0		Out of focus. Video is very dark
t19	2	4	0	0		Out of focus. Video is very dark
t19	2	5	0	0		Out of focus. Video is very dark
t19	2	6	0	0		Out of focus. Video is very dark
t19	2	7	0	0		Out of focus. Video is very dark
t19	2	8	0	0		Out of focus. Video is very dark
t19	2	9	0	0		Out of focus. Video is very dark
t19	2	10	0	0		Out of focus. Video is very dark
t19	2	11	0	0		Out of focus. Video is very dark
t19	2	12	0	0		Out of focus. Video is very dark
t19	2	13	1	0		Out of focus. Video is very dark
t19	2	14	1	0		Out of focus. Video is very dark
t19	2	15	1	0		Out of focus. Video is very dark
t19	2	16	1	0		Out of focus. Video is very dark
t19	2	17	0	1		Out of focus. Video is very dark
t19	2	18	0	1	eating	Out of focus. Video is very dark
t19	3	0	1	0		Out of focus. Video is very dark
t19	3	1	1	0		Out of focus. Video is very dark
t19	3	2	1	0		Out of focus. Video is very dark
t19	3	3	1	0		Out of focus. Video is very dark
t19	3	4	1	0		Out of focus. Video is very dark
t19	3	5	1	0		Out of focus. Video is very dark
t19	3	6	1	0		Out of focus. Video is very dark
t19	3	7	1	0		Out of focus. Video is very dark
t19	3	8	0	1		Out of focus. Video is very dark
t19	3	9	0	1		Out of focus. Video is very dark
t19	3	10	0	1		Out of focus. Video is very dark
t19	3	11	0	0		Out of focus. Video is very dark
t19	3	12	1	0		Out of focus. Video is very dark
t19	3	13	0	1	eating	Out of focus. Video is very dark
t19	3	14	0	1	eating	Out of focus. Video is very dark
t19	3	15	0	1	eating	Out of focus. Video is very dark
t19	3	16	0	1	eating	Out of focus. Video is very dark
t19	3	17	0	1	eating	Out of focus. Video is very dark
t19	3	18	0	1	eating	Out of focus. Video is very dark
t19	4	0	0	1	fish doesn't stay at surface for a while	at back of tank, so difficult to tell the movement
t19	4	1	0	0
t19	4	2	0	0
t19	4	3	0	0
t19	4	4	0	0
t19	4	5	0	0
t19	4	6	0	0
t19	4	7	0	0
t19	4	8	1	0		Took this value as t1
t19	4	9	1	0
t19	4	10	1	0
t19	4	11	1	0
t19	4	12	1	0
t19	4	13	1	0
t19	4	14	0	1
t19	4	15	0	1	eating
t19	4	16	0	1
t19	4	17	0	1
t19	4	18	0	0
t19	5	0	1	0
t19	5	1	0	0
t19	5	2	0	0
t19	5	3	1	0
t19	5	4	1	0
t19	5	5	1	0
t19	5	6	1	0
t19	5	7	1	0
t19	5	8	1	0
t19	5	9	1	0
t19	5	10	1	0
t19	5	11	1	0
t19	5	12	1	0
t19	5	13	0	1
t19	5	14	1	0
t19	5	15	1	0
t19	5	16	0	1	eating
t19	5	17	0	1	eating
t19	5	18	0	1	eating
t19	6	0	1	0	Fish in the middle of the tank. Didn't move much
t19	6	1	1	0	Fish in the middle of the tank. Didn't move much
t19	6	2	1	0	Fish in the middle of the tank. Didn't move much
t19	6	3	1	0	Fish in the middle of the tank. Didn't move much
t19	6	4	0	0	Fish in the middle of the tank. Didn't move much
t19	6	5	0	0	Fish in the middle of the tank. Didn't move much
t19	6	6	0	0	Fish in the middle of the tank. Didn't move much
t19	6	7	1	0	Fish in the middle of the tank. Didn't move much
t19	6	8	1	0	Fish in the middle of the tank. Didn't move much
t19	6	9	1	0	Fish in the middle of the tank. Didn't move much
t19	6	10	1	0	Fish in the middle of the tank. Didn't move much
t19	6	11	1	0	Fish in the middle of the tank. Didn't move much
t19	6	12	1	0	Fish in the middle of the tank. Didn't move much
t19	6	13	1	0	Fish in the middle of the tank. Didn't move much
t19	6	14	1	0	Fish in the middle of the tank. Didn't move much
t19	6	15	1	0	Fish in the middle of the tank. Didn't move much
t19	6	16	1	0	Fish in the middle of the tank. Didn't move much
t19	6	17	1	0	Fish in the middle of the tank. Didn't move much
t19	6	18	1	0	Fish in the middle of the tank. Didn't move much
t19	7	0	0	1
t19	7	1	0	0	Fish dive down
t19	7	2	0	0	Fish at the bottom of the tank
t19	7	3	0	0	Fish at the bottom of the tank
t19	7	4	0	0	Fish at the bottom of the tank
t19	7	5	0	0	Fish at the bottom of the tank
t19	7	6	1	0	Fish at the bottom of the tank
t19	7	7	1	0	Fish at the bottom of the tank
t19	7	8	0	0	Fish at the bottom of the tank
t19	7	9	0	0	Fish at the bottom of the tank
t19	7	10	0	0	Fish at the bottom of the tank
t19	7	11	0	0	Fish at the bottom of the tank
t19	7	12	0	0	Fish at the bottom of the tank
t19	7	13	0	0	Fish at the bottom of the tank
t19	7	14	0	0	Fish at the bottom of the tank
t19	7	15	0	0	Fish at the bottom of the tank
t19	7	16	0	0	Fish at the bottom of the tank
t19	7	17	0	0	Fish at the bottom of the tank
t19	7	18	0	0	Fish at the bottom of the tank
t19	8	0	1	0
t19	8	1	0	0
t19	8	2	1	0
t19	8	3	1	0
t19	8	4	1	0
t19	8	5	0	0
t19	8	6	0	0
t19	8	7	0	0
t19	8	8	0	0
t19	8	9	0	0
t19	8	10	0	0
t19	8	11	0	0
t19	8	12	1	0
t19	8	13	1	0
t19	8	14	1	0
t19	8	15	1	0
t19	8	16	1	0
t19	8	17	0	1	eating
t19	8	18	0	1	eating
t19	9	0	0	0
t19	9	1	1	0
t19	9	2	1	0
t19	9	3	1	0
t19	9	4	1	0
t19	9	5	1	0
t19	9	6	0	1
t19	9	7	0	1
t19	9	8	0	1
t19	9	9	0	0
t19	9	10	0	0
t19	9	11	1	0
t19	9	12	0	0
t19	9	13	0	0
t19	9	14	0	0
t19	9	15	1	0
t19	9	16	1	0
t19	9	17	1	0
t19	9	18	0	1	eating
t19	10	0	0	0	within 2 cm from surface
t19	10	1	0	0
t19	10	2	1	0
t19	10	3	1	0
t19	10	4	1	0
t19	10	5	0	1
t19	10	6	0	1
t19	10	7	0	1
t19	10	8	0	1
t19	10	9	0	0
t19	10	10	1	0
t19	10	11	1	0
t19	10	12	1	0
t19	10	13	1	0
t19	10	14	0	1	eating
t19	10	15	0	1	eating
t19	10	16	0	1	eating
t19	10	17	0	1	eating
t19	10	18	0	1	eating
t19	11	0	0	0
t19	11	1	1	0
t19	11	2	1	0
t19	11	3	1	0
t19	11	4	1	0
t19	11	5	1	0
t19	11	6	1	0
t19	11	7	0	1
t19	11	8	0	1
t19	11	9	0	1
t19	11	10	0	1
t19	11	11	0	1
t19	11	12	0	1
t19	11	13	0	1
t19	11	14	0	1	eating
t19	11	15	0	1	eating
t19	11	16	0	1	eating
t19	11	17	0	1	eating
t19	11	18	0	1	eating
t19	12	0	1	0	within 1 cm from surface
t19	12	1	0	1
t19	12	2	0	1
t19	12	3	0	1
t19	12	4	0	1
t19	12	5	0	1
t19	12	6	0	0
t19	12	7	1	0
t19	12	8	1	0
t19	12	9	1	0
t19	12	10	0	1
t19	12	11	0	1
t19	12	12	0	1
t19	12	13	0	1	eating
t19	12	14	0	1	eating
t19	12	15	0	1	eating
t19	12	16	0	1	eating
t19	12	17	0	1	eating
t19	12	18	0	1	eating
t19	13	0	0	0	Fish at the bottom of the tank
t19	13	1	0	0	Fish at the bottom of the tank
t19	13	2	1	0	Fish at the bottom of the tank
t19	13	3	1	0	Fish at the bottom of the tank
t19	13	4	1	0	Fish at the bottom of the tank
t19	13	5	1	0	Fish at the bottom of the tank
t19	13	6	1	0	Fish at the bottom of the tank
t19	13	7	0	0	Fish at the bottom of the tank
t19	13	8	0	0	Fish at the bottom of the tank
t19	13	9	0	0	Fish at the bottom of the tank
t19	13	10	0	0	Fish at the bottom of the tank
t19	13	11	0	0	Fish at the bottom of the tank
t19	13	12	0	0	Fish at the bottom of the tank
t19	13	13	0	0	Fish at the bottom of the tank
t19	13	14	0	0	Fish at the bottom of the tank
t19	13	15	0	0	Fish at the bottom of the tank
t19	13	16	0	0	Fish at the bottom of the tank
t19	13	17	0	0	Fish at the bottom of the tank
t19	13	18	0	0	Fish at the bottom of the tank
t19	14	0	0	0
t19	14	1	0	0
t19	14	2	0	0
t19	14	3	1	0
t19	14	4	1	0
t19	14	5	1	0
t19	14	6	1	0
t19	14	7	1	0
t19	14	8	1	0
t19	14	9	1	0
t19	14	10	1	0
t19	14	11	1	0
t19	14	12	1	0
t19	14	13	1	0
t19	14	14	1	0
t19	14	15	1	0
t19	14	16	1	0
t19	14	17	1	0
t19	14	18	1	0	ultimately eating
t19	15	0	0	0
t19	15	1	1	0
t19	15	2	1	0
t19	15	3	1	0
t19	15	4	1	0
t19	15	5	1	0
t19	15	6	1	0
t19	15	7	1	0
t19	15	8	1	0
t19	15	9	1	0
t19	15	10	1	0
t19	15	11	1	0
t19	15	12	0	1
t19	15	13	0	1	eating
t19	15	14	0	1	eating
t19	15	15	0	1	eating
t19	15	16	0	1	eating
t19	15	17	0	1	eating
t19	15	18	0	1	eating
t19	16	0	1	0
t19	16	1	1	0
t19	16	2	0	1
t19	16	3	0	1
t19	16	4	0	1
t19	16	5	0	1
t19	16	6	0	1
t19	16	7	0	1
t19	16	8	0	1
t19	16	9	0	1
t19	16	10	0	1
t19	16	11	0	1
t19	16	12	0	1	eating
t19	16	13	0	1	eating
t19	16	14	0	1	eating
t19	16	15	0	0
t19	16	16	1	0
t19	16	17	1	0
t19	16	18	0	1
t19	17	0	1	0	Fish at the bottom quarter of the tank
t19	17	1	1	0	Fish at the bottom quarter of the tank
t19	17	2	0	0	Fish at the bottom quarter of the tank
t19	17	3	1	0	Fish at the bottom quarter of the tank
t19	17	4	1	0	Fish at the bottom quarter of the tank
t19	17	5	1	0	Fish at the bottom quarter of the tank
t19	17	6	0	0	Fish at the bottom quarter of the tank
t19	17	7	0	0	Fish at the bottom quarter of the tank
t19	17	8	0	0	Fish at the bottom quarter of the tank
t19	17	9	0	0	Fish at the bottom quarter of the tank
t19	17	10	0	0	Fish at the bottom quarter of the tank
t19	17	11	0	0	Fish at the bottom quarter of the tank
t19	17	12	0	0	Fish at the bottom quarter of the tank
t19	17	13	0	0	Fish at the bottom quarter of the tank
t19	17	14	0	0	Fish at the bottom quarter of the tank
t19	17	15	0	0	Fish at the bottom quarter of the tank
t19	17	16	0	0	Fish at the bottom quarter of the tank
t19	17	17	0	0	Fish at the bottom quarter of the tank
t19	17	18	0	0	Fish at the bottom quarter of the tank
t19	18	0	0	0
t19	18	1	0	0
t19	18	2	0	0
t19	18	3	0	0
t19	18	4	0	0
t19	18	5	0	0
t19	18	6	0	0
t19	18	7	0	0
t19	18	8	0	0
t19	18	9	0	0
t19	18	10	0	0
t19	18	11	0	0
t19	18	12	0	0
t19	18	13	0	0
t19	18	14	0	0
t19	18	15	0	0
t19	18	16	1	0
t19	18	17	1	0
t19	18	18	1	0	ultimately reaches surface and eating
t19	19	0	0	0	FIsh at the bottom quarter of the tank
t19	19	1	0	0	FIsh at the bottom quarter of the tank
t19	19	2	0	0	FIsh at the bottom quarter of the tank
t19	19	3	0	0	FIsh at the bottom quarter of the tank
t19	19	4	0	0	FIsh at the bottom quarter of the tank
t19	19	5	0	0	FIsh at the bottom quarter of the tank
t19	19	6	0	0	FIsh at the bottom quarter of the tank
t19	19	7	0	0	FIsh at the bottom quarter of the tank
t19	19	8	0	0	FIsh at the bottom quarter of the tank
t19	19	9	0	0	FIsh at the bottom quarter of the tank
t19	19	10	0	0	FIsh at the bottom quarter of the tank
t19	19	11	0	0	FIsh at the bottom quarter of the tank
t19	19	12	0	0	FIsh at the bottom quarter of the tank
t19	19	13	0	0	FIsh at the bottom quarter of the tank
t19	19	14	0	0	FIsh at the bottom quarter of the tank
t19	19	15	0	0	FIsh at the bottom quarter of the tank
t19	19	16	0	0	FIsh at the bottom quarter of the tank
t19	19	17	0	0	FIsh at the bottom quarter of the tank
t19	19	18	0	0	FIsh at the bottom quarter of the tank
t19	20	0	1	0	Fish at the bottom of the tank
t19	20	1	1	0	Fish at the bottom of the tank
t19	20	2	0	0	Fish at the bottom of the tank
t19	20	3	0	0	Fish at the bottom of the tank
t19	20	4	0	0	Fish at the bottom of the tank
t19	20	5	0	0	Fish at the bottom of the tank
t19	20	6	0	0	Fish at the bottom of the tank
t19	20	7	1	0	Fish at the bottom of the tank
t19	20	8	0	0	Fish at the bottom of the tank
t19	20	9	0	0	Fish at the bottom of the tank
t19	20	10	0	0	Fish at the bottom of the tank
t19	20	11	0	0	Fish at the bottom of the tank
t19	20	12	0	0	Fish at the bottom of the tank
t19	20	13	0	0	Fish at the bottom of the tank
t19	20	14	0	0	Fish at the bottom of the tank
t19	20	15	0	0	Fish at the bottom of the tank
t19	20	16	0	0	Fish at the bottom of the tank
t19	20	17	0	0	Fish at the bottom of the tank
t19	20	18	0	0	Fish at the bottom of the tank
t19	21	0	1	0	Fish at the bottom quarter of the tank
t19	21	1	1	0	Fish at the bottom quarter of the tank
t19	21	2	1	0	Fish at the bottom quarter of the tank
t19	21	3	1	0	Fish at the bottom quarter of the tank
t19	21	4	1	0	Fish at the bottom quarter of the tank
t19	21	5	0	0	Fish at the bottom quarter of the tank
t19	21	6	0	0	Fish at the bottom quarter of the tank
t19	21	7	1	0	Fish at the bottom quarter of the tank
t19	21	8	1	0	Fish at the bottom quarter of the tank
t19	21	9	1	0	Fish at the bottom quarter of the tank
t19	21	10	1	0	Fish at the bottom quarter of the tank
t19	21	11	0	0	Fish at the bottom quarter of the tank
t19	21	12	0	0	Fish at the bottom quarter of the tank
t19	21	13	1	0	Fish at the bottom quarter of the tank
t19	21	14	0	0	Fish at the bottom quarter of the tank
t19	21	15	0	0	Fish at the bottom quarter of the tank
t19	21	16	1	0	Fish at the bottom quarter of the tank
t19	21	17	1	0	Fish at the bottom quarter of the tank
t19	21	18	0	0	Fish at the bottom quarter of the tank

## Sheet: Fish_20
Animal ID (WT)	Video #	Second #	Animal Moving Upward? (any displacement toward the light's direction, inferred from the position the next second) (1 = yes; 0 = no)	Animal at Surface? (1 = yes; 0 = no)	Behavior Notes	Video Quality Notes	Other notes
t20	0	0	1	0	Fish at the bottom of the tank
t20	0	1	1	0	Fish at the bottom of the tank
t20	0	2	1	0	Fish at the bottom of the tank
t20	0	3	0	0	Fish at the bottom of the tank
t20	0	4	0	0	Fish at the bottom of the tank
t20	0	5	1	0	Fish at the bottom of the tank
t20	0	6	0	0	Fish at the bottom of the tank
t20	0	7	0	0	Fish at the bottom of the tank
t20	0	8	0	0	Fish at the bottom of the tank
t20	0	9	0	0	Fish at the bottom of the tank
t20	0	10	0	0	Fish at the bottom of the tank
t20	0	11	0	0	Fish at the bottom of the tank
t20	0	12	0	0	Fish at the bottom of the tank
t20	0	13	0	0	Fish at the bottom of the tank
t20	0	14	0	0	Fish at the bottom of the tank
t20	0	15	0	0	Fish at the bottom of the tank
t20	0	16	0	0	Fish at the bottom of the tank
t20	0	17	0	0	Fish at the bottom of the tank
t20	0	18	0	0
t20	1	0	0	0	Fish at the bottom of the tank
t20	1	1	0	0	Fish at the bottom of the tank
t20	1	2	0	0	Fish at the bottom of the tank
t20	1	3	0	0	Fish at the bottom of the tank
t20	1	4	0	0	Fish at the bottom of the tank
t20	1	5	1	0	Fish at the bottom of the tank
t20	1	6	1	0	Fish at the bottom of the tank
t20	1	7	1	0	Fish at the bottom of the tank
t20	1	8	1	0	Fish at the bottom of the tank
t20	1	9	1	0	Fish at the bottom of the tank
t20	1	10	0	0	Fish at the bottom of the tank
t20	1	11	1	0	Fish at the bottom of the tank
t20	1	12	1	0	Fish at the bottom of the tank
t20	1	13	1	0	Fish at the bottom of the tank
t20	1	14	0	0	Fish at the bottom of the tank
t20	1	15	0	0	Fish at the bottom of the tank
t20	1	16	1	0	Fish at the bottom of the tank
t20	1	17	0	0	Fish at the bottom of the tank
t20	1	18	0	0	Fish at the bottom of the tank
t20	2	0	1	0	Fish at the bottom of the tank
t20	2	1	1	0	Fish at the bottom of the tank
t20	2	2	0	0	Fish at the bottom of the tank
t20	2	3	0	0	Fish at the bottom of the tank
t20	2	4	0	0	Fish at the bottom of the tank
t20	2	5	0	0	Fish at the bottom of the tank
t20	2	6	0	0	Fish at the bottom of the tank
t20	2	7	0	0	Fish at the bottom of the tank
t20	2	8	0	0	Fish at the bottom of the tank
t20	2	9	0	0	Fish at the bottom of the tank
t20	2	10	0	0	Fish at the bottom of the tank
t20	2	11	0	0	Fish at the bottom of the tank
t20	2	12	1	0	Fish at the bottom of the tank
t20	2	13	1	0	Fish at the bottom of the tank
t20	2	14	1	0	Fish at the bottom of the tank
t20	2	15	1	0	Fish at the bottom of the tank
t20	2	16	1	0	Fish at the bottom of the tank
t20	2	17	1	0	Fish at the bottom of the tank
t20	2	18	1	0	Fish at the bottom of the tank
t20	3	0	0	0
t20	3	1	0	0
t20	3	2	0	0
t20	3	3	1	0
t20	3	4	1	0
t20	3	5	1	0
t20	3	6	1	0
t20	3	7	1	0
t20	3	8	1	0
t20	3	9	0	0
t20	3	10	0	0
t20	3	11	0	0
t20	3	12	0	0
t20	3	13	1	0
t20	3	14	1	0
t20	3	15	0	0
t20	3	16	1	0
t20	3	17	1	0
t20	3	18	1	0
t20	4	0	1	0
t20	4	1	1	0
t20	4	2	1	0
t20	4	3	1	0
t20	4	4	1	0
t20	4	5	0	1
t20	4	6	0	1
t20	4	7	0	1
t20	4	8	0	1
t20	4	9	0	1
t20	4	10	0	1
t20	4	11	0	1
t20	4	12	0	1
t20	4	13	0	1
t20	4	14	0	1
t20	4	15	0	1
t20	4	16	0	1
t20	4	17	0	1
t20	4	18	0	1	eating
t20	5	0	0	0
t20	5	1	0	0	Fish at the bottom of the tank
t20	5	2	0	0	Fish at the bottom of the tank
t20	5	3	0	0	Fish at the bottom of the tank
t20	5	4	0	0	Fish at the bottom of the tank
t20	5	5	0	0	Fish at the bottom of the tank
t20	5	6	0	0	Fish at the bottom of the tank
t20	5	7	0	0	Fish at the bottom of the tank
t20	5	8	0	0	Fish at the bottom of the tank
t20	5	9	0	0	Fish at the bottom of the tank
t20	5	10	0	0	Fish at the bottom of the tank
t20	5	11	0	0	Fish at the bottom of the tank
t20	5	12	0	0	Fish at the bottom of the tank
t20	5	13	0	0	Fish at the bottom of the tank
t20	5	14	0	0	Fish at the bottom of the tank
t20	5	15	0	0	Fish at the bottom of the tank
t20	5	16	0	0	Fish at the bottom of the tank
t20	5	17	0	0	Fish at the bottom of the tank
t20	5	18	0	0	Fish at the bottom of the tank
t20	6	0	1	0
t20	6	1	1	0
t20	6	2	1	0
t20	6	3	0	0
t20	6	4	0	0
t20	6	5	0	0
t20	6	6	1	0
t20	6	7	0	1	touches surface
t20	6	8	1	0
t20	6	9	0	1
t20	6	10	0	1
t20	6	11	0	1
t20	6	12	0	1
t20	6	13	0	1
t20	6	14	0	1
t20	6	15	0	1
t20	6	16	0	1	eating
t20	6	17	0	1	eating
t20	6	18	0	1	eating
t20	7	0	1	0
t20	7	1	1	0
t20	7	2	1	0
t20	7	3	1	0
t20	7	4	1	0
t20	7	5	0	0
t20	7	6	0	0
t20	7	7	0	0
t20	7	8	0	0
t20	7	9	0	0
t20	7	10	0	0
t20	7	11	0	0
t20	7	12	0	0
t20	7	13	0	0
t20	7	14	0	0
t20	7	15	0	0
t20	7	16	0	0
t20	7	17	0	0
t20	7	18	0	0
t20	8	0	1	0
t20	8	1	0	0
t20	8	2	0	0
t20	8	3	1	0
t20	8	4	1	0
t20	8	5	1	0
t20	8	6	1	0
t20	8	7	0	0
t20	8	8	0	0
t20	8	9	0	0
t20	8	10	1	0
t20	8	11	1	0
t20	8	12	1	0
t20	8	13	1	0
t20	8	14	1	0
t20	8	15	1	0
t20	8	16	1	0
t20	8	17	1	0
t20	8	18	1	0	Reaches surface at 19 sec and eating
t20	9	0	0	0
t20	9	1	1	0
t20	9	2	1	0
t20	9	3	1	0
t20	9	4	1	0
t20	9	5	0	1
t20	9	6	0	1
t20	9	7	0	1
t20	9	8	0	1
t20	9	9	0	1
t20	9	10	0	1
t20	9	11	0	1
t20	9	12	0	1
t20	9	13	0	1
t20	9	14	0	1	eating
t20	9	15	0	1	eating
t20	9	16	0	1	eating
t20	9	17	0	1	eating
t20	9	18	0	1	eating
t20	10	0	1	0
t20	10	1	1	0
t20	10	2	1	0
t20	10	3	0	0
t20	10	4	0	0
t20	10	5	0	0
t20	10	6	0	0
t20	10	7	1	0
t20	10	8	0	1
t20	10	9	0	1
t20	10	10	0	1
t20	10	11	0	1	eating
t20	10	12	0	1	eating
t20	10	13	0	1	eating
t20	10	14	0	1	eating
t20	10	15	0	1	eating
t20	10	16	0	1	eating
t20	10	17	0	0
t20	10	18	1	0
t20	11	0	0	0
t20	11	1	0	0
t20	11	2	1	0
t20	11	3	1	0
t20	11	4	0	1	touches surface and then turns around
t20	11	5	1	0
t20	11	6	0	1
t20	11	7	0	0
t20	11	8	1	0
t20	11	9	0	0
t20	11	10	0	0
t20	11	11	1	0
t20	11	12	0	0
t20	11	13	0	0
t20	11	14	0	0
t20	11	15	1	0
t20	11	16	1	0
t20	11	17	0	1	eating
t20	11	18	0	0
t20	12	0	1	0
t20	12	1	1	0
t20	12	2	1	0
t20	12	3	0	1
t20	12	4	0	1
t20	12	5	0	1
t20	12	6	0	1
t20	12	7	0	1
t20	12	8	0	1
t20	12	9	0	1
t20	12	10	0	1
t20	12	11	0	1
t20	12	12	0	1
t20	12	13	0	1	eating
t20	12	14	0	0
t20	12	15	0	0
t20	12	16	1	0
t20	12	17	1	0
t20	12	18	0	1
t20	13	0	0	0	Fish in the middle of the tank
t20	13	1	0	0	Fish in the middle of the tank
t20	13	2	0	0	Fish in the middle of the tank
t20	13	3	0	0	Fish in the middle of the tank
t20	13	4	0	0	Fish in the middle of the tank
t20	13	5	0	0	Fish in the middle of the tank
t20	13	6	0	0	Fish in the middle of the tank
t20	13	7	0	0	Fish in the middle of the tank
t20	13	8	0	0	Fish in the middle of the tank
t20	13	9	0	0	Fish in the middle of the tank
t20	13	10	0	0	Fish in the middle of the tank
t20	13	11	0	0	Fish in the middle of the tank
t20	13	12	1	0	Fish in the middle of the tank
t20	13	13	0	0	Fish in the middle of the tank
t20	13	14	0	0	Fish in the middle of the tank
t20	13	15	0	0	Fish in the middle of the tank
t20	13	16	0	0	Fish in the middle of the tank
t20	13	17	0	0	Fish in the middle of the tank
t20	13	18	0	0	Fish in the middle of the tank
t20	14	0	0	0	Fish at the bottom of the tank
t20	14	1	1	0	Fish at the bottom of the tank
t20	14	2	0	0	Fish at the bottom of the tank
t20	14	3	1	0	Fish at the bottom of the tank
t20	14	4	0	0	Fish at the bottom of the tank
t20	14	5	1	0	Fish at the bottom of the tank
t20	14	6	1	0	Fish at the bottom of the tank
t20	14	7	0	0	Fish at the bottom of the tank
t20	14	8	0	0	Fish at the bottom of the tank
t20	14	9	0	0	Fish at the bottom of the tank
t20	14	10	0	0	Fish at the bottom of the tank
t20	14	11	0	0	Fish at the bottom of the tank
t20	14	12	0	0	Fish at the bottom of the tank
t20	14	13	0	0	Fish at the bottom of the tank
t20	14	14	0	0	Fish at the bottom of the tank
t20	14	15	0	0	Fish at the bottom of the tank
t20	14	16	0	0	Fish at the bottom of the tank
t20	14	17	0	0	Fish at the bottom of the tank
t20	14	18	0	0	Fish at the bottom of the tank
t20	15	0	0	0
t20	15	1	1	0
t20	15	2	1	0
t20	15	3	1	0
t20	15	4	0	1
t20	15	5	0	1
t20	15	6	0	1
t20	15	7	0	1
t20	15	8	0	1
t20	15	9	0	1
t20	15	10	0	1
t20	15	11	0	1
t20	15	12	0	1
t20	15	13	0	1	eating
t20	15	14	0	1	eating
t20	15	15	0	1	eating
t20	15	16	0	1	eating
t20	15	17	0	1	eating
t20	15	18	0	1	eating
t20	16	0	1	0
t20	16	1	0	0
t20	16	2	1	0
t20	16	3	1	0
t20	16	4	1	0
t20	16	5	1	0
t20	16	6	1	0
t20	16	7	1	0
t20	16	8	1	0
t20	16	9	1	0
t20	16	10	1	0
t20	16	11	0	1
t20	16	12	0	1
t20	16	13	0	1
t20	16	14	0	1
t20	16	15	0	1	eating
t20	16	16	0	1	eating
t20	16	17	0	1	eating
t20	16	18	0	1	eating
t20	17	0	0	0	Fish at the bottom of the tank
t20	17	1	0	0	Fish at the bottom of the tank
t20	17	2	0	0	Fish at the bottom of the tank
t20	17	3	0	0	Fish at the bottom of the tank
t20	17	4	0	0	Fish at the bottom of the tank
t20	17	5	0	0	Fish at the bottom of the tank
t20	17	6	0	0	Fish at the bottom of the tank
t20	17	7	0	0	Fish at the bottom of the tank
t20	17	8	0	0	Fish at the bottom of the tank
t20	17	9	0	0	Fish at the bottom of the tank
t20	17	10	1	0	Fish at the bottom of the tank
t20	17	11	1	0	Fish at the bottom of the tank
t20	17	12	1	0	Fish at the bottom of the tank
t20	17	13	1	0	Fish at the bottom of the tank
t20	17	14	1	0	Fish at the bottom of the tank
t20	17	15	0	0	Fish at the bottom of the tank
t20	17	16	0	0	Fish at the bottom of the tank
t20	17	17	0	0	Fish at the bottom of the tank
t20	17	18	1	0	Fish at the bottom of the tank
t20	18	0	1	0
t20	18	1	0	0
t20	18	2	0	0
t20	18	3	1	0
t20	18	4	1	0
t20	18	5	1	0
t20	18	6	0	1
t20	18	7	0	1
t20	18	8	0	1
t20	18	9	0	1
t20	18	10	0	1
t20	18	11	0	1
t20	18	12	0	1
t20	18	13	0	1	eating
t20	18	14	0	1	eating
t20	18	15	0	1	eating
t20	18	16	0	1	eating
t20	18	17	0	1	eating
t20	18	18	0	1	eating
t20	19	0	1	0
t20	19	1	1	0
t20	19	2	1	0
t20	19	3	1	0
t20	19	4	0	1
t20	19	5	0	1
t20	19	6	0	1
t20	19	7	0	1
t20	19	8	0	1
t20	19	9	0	1
t20	19	10	0	1
t20	19	11	0	1
t20	19	12	0	1
t20	19	13	0	1	eating
t20	19	14	0	1	eating
t20	19	15	0	1	eating
t20	19	16	0	1	eating
t20	19	17	0	1	eating
t20	19	18	0	1	eating
t20	20	0	0	1
t20	20	1	0	0
t20	20	2	1	0
t20	20	3	1	0
t20	20	4	1	0
t20	20	5	1	0
t20	20	6	1	0
t20	20	7	1	0
t20	20	8	0	1
t20	20	9	0	1
t20	20	10	0	1
t20	20	11	0	1
t20	20	12	0	1
t20	20	13	0	1	eating
t20	20	14	0	0
t20	20	15	0	0
t20	20	16	0	0
t20	20	17	0	0
t20	20	18	1	0
t20	21	0	0	0	Fish at the bottom of the tank
t20	21	1	0	0	Fish at the bottom of the tank
t20	21	2	0	0	Fish at the bottom of the tank
t20	21	3	0	0	Fish at the bottom of the tank
t20	21	4	0	0	Fish at the bottom of the tank
t20	21	5	0	0	Fish at the bottom of the tank
t20	21	6	0	0	Fish at the bottom of the tank
t20	21	7	0	0	Fish at the bottom of the tank
t20	21	8	1	0	Fish at the bottom of the tank
t20	21	9	1	0	Fish at the bottom of the tank
t20	21	10	0	0	Fish at the bottom of the tank
t20	21	11	0	0	Fish at the bottom of the tank
t20	21	12	0	0	Fish at the bottom of the tank
t20	21	13	0	0	Fish at the bottom of the tank
t20	21	14	0	0	Fish at the bottom of the tank
t20	21	15	0	0	Fish at the bottom of the tank
t20	21	16	0	0	Fish at the bottom of the tank
t20	21	17	0	0	Fish at the bottom of the tank
t20	21	18	0	0	Fish at the bottom of the tank
