# Supplementary material for: An automated feeding system for the African killifish reveals the impact of diet on lifespan and allows scalable assessment of associative learning
Source: eLife. 2022 Nov 10;11:e69008. doi: 10.7554/eLife.69008 (PMC9788828; doi:10.7554/eLife.69008)
Supplement: Figure 6—source data 8. [file elife-69008-fig6-data8.xlsx]

## Sheet: Fish_3
Animal ID (WT)	Video #	Second #	Animal Moving Upward? (any displacement toward the light's direction, inferred from the position the next second) (1 = yes; 0 = no)	Animal at Surface? (1 = yes; 0 = no)	Behavior Notes	Video Quality Notes	Other notes
t3	0	0	0	0		out of focus
t3	0	1	0	0		out of focus
t3	0	2	0	0		out of focus
t3	0	3	0	0		out of focus
t3	0	4	1	0		out of focus
t3	0	5	0	0		out of focus
t3	0	6	0	0		out of focus
t3	0	7	0	0		out of focus
t3	0	8	1	0		out of focus
t3	0	9	1	0		out of focus
t3	0	10	1	0		out of focus
t3	0	11	1	0		out of focus
t3	0	12	0	1	eating	out of focus
t3	0	13	0	1	eating	out of focus
t3	0	14	0	1	eating	out of focus
t3	0	15	0	1	eating	out of focus
t3	0	16	0	1	eating	out of focus
t3	0	17	0	1	eating	out of focus
t3	0	18	0	1	eating	out of focus
t3	1	0	0	1		out of focus
t3	1	1	0	1		out of focus
t3	1	2	0	0	within 3 cm from surface	out of focus
t3	1	3	0	0	within 3 cm from surface	out of focus
t3	1	4	0	0	within 3 cm from surface	out of focus
t3	1	5	0	0		out of focus
t3	1	6	0	0		out of focus
t3	1	7	0	0		out of focus
t3	1	8	0	0		out of focus
t3	1	9	0	0		out of focus
t3	1	10	0	0		out of focus
t3	1	11	0	0		out of focus
t3	1	12	0	0		out of focus
t3	1	13	0	0		out of focus
t3	1	14	0	0		out of focus
t3	1	15	0	0		out of focus
t3	1	16	1	0		out of focus
t3	1	17	1	0		out of focus
t3	1	18	1	0	ultimately reaches the surface	out of focus
t3	2	0	0	0		out of focus
t3	2	1	0	0		out of focus
t3	2	2	0	0		out of focus
t3	2	3	0	0		out of focus
t3	2	4	0	0		out of focus
t3	2	5	0	0		out of focus
t3	2	6	0	0		out of focus
t3	2	7	0	0		out of focus
t3	2	8	0	0		out of focus
t3	2	9	0	0		out of focus
t3	2	10	0	0		out of focus
t3	2	11	1	0		out of focus
t3	2	12	1	0		out of focus
t3	2	13	1	0		out of focus
t3	2	14	0	1		out of focus
t3	2	15	0	1		out of focus
t3	2	16	0	1		out of focus
t3	2	17	0	1		out of focus
t3	2	18	0	1		out of focus
t3	3	0	0	0		out of focus
t3	3	1	0	0		out of focus
t3	3	2	0	0		out of focus
t3	3	3	0	0		out of focus
t3	3	4	0	0		out of focus
t3	3	5	0	0		out of focus
t3	3	6	1	0		out of focus
t3	3	7	1	0		out of focus
t3	3	8	1	0		out of focus
t3	3	9	1	0		out of focus
t3	3	10	1	0		out of focus
t3	3	11	1	0		out of focus
t3	3	12	1	0		out of focus
t3	3	13	1	0		out of focus
t3	3	14	1	0		out of focus
t3	3	15	0	1		out of focus
t3	3	16	0	1		out of focus
t3	3	17	0	1	eating	out of focus
t3	3	18	0	1	eating	out of focus
t3	4	0	0	1		out of focus
t3	4	1	0	1		out of focus
t3	4	2	0	0	within 3 cm from the surface	out of focus
t3	4	3	0	0		out of focus
t3	4	4	0	0		out of focus
t3	4	5	1	0		out of focus
t3	4	6	1	0		out of focus
t3	4	7	0	1		out of focus
t3	4	8	0	1		out of focus
t3	4	9	0	1	eating	out of focus
t3	4	10	0	1	eating	out of focus
t3	4	11	0	1	eating	out of focus
t3	4	12	0	1	eating	out of focus
t3	4	13	0	1	eating	out of focus
t3	4	14	0	1	eating	out of focus
t3	4	15	0	1	eating	out of focus
t3	4	16	0	1	eating	out of focus
t3	4	17	0	1	eating	out of focus
t3	4	18	0	1	eating	out of focus
t3	5	0	0	0		out of focus
t3	5	1	0	0		out of focus
t3	5	2	1	0		out of focus
t3	5	3	1	0		out of focus
t3	5	4	0	1		out of focus
t3	5	5	0	1		out of focus
t3	5	6	0	1		out of focus
t3	5	7	0	1		out of focus
t3	5	8	0	1	eating	out of focus
t3	5	9	0	1	eating	out of focus
t3	5	10	0	1	eating	out of focus
t3	5	11	0	1	eating	out of focus
t3	5	12	0	1	eating	out of focus
t3	5	13	0	1	eating	out of focus
t3	5	14	0	1	eating	out of focus
t3	5	15	0	1	eating	out of focus
t3	5	16	0	1	eating	out of focus
t3	5	17	0	1	eating	out of focus
t3	5	18	0	1	eating	out of focus
t3	6	0	0	0		out of focus
t3	6	1	0	0		out of focus
t3	6	2	0	0		out of focus
t3	6	3	1	0		out of focus
t3	6	4	1	0		out of focus
t3	6	5	1	0		out of focus
t3	6	6	0	1		out of focus
t3	6	7	0	1		out of focus
t3	6	8	0	1	eating	out of focus
t3	6	9	0	1	eating	out of focus
t3	6	10	0	1	eating	out of focus
t3	6	11	0	1	eating	out of focus
t3	6	12	0	1	eating	out of focus
t3	6	13	0	1	eating	out of focus
t3	6	14	0	1	eating	out of focus
t3	6	15	0	1	eating	out of focus
t3	6	16	0	1	eating	out of focus
t3	6	17	0	1	eating	out of focus
t3	6	18	0	1	eating	out of focus
t3	7	0	0	0		out of focus
t3	7	1	0	0		out of focus
t3	7	2	1	0		out of focus
t3	7	3	1	0		out of focus
t3	7	4	1	0		out of focus
t3	7	5	0	1		out of focus
t3	7	6	0	1		out of focus
t3	7	7	0	1	eating	out of focus
t3	7	8	0	1	eating	out of focus
t3	7	9	0	1	eating	out of focus
t3	7	10	0	1	eating	out of focus
t3	7	11	0	1	eating	out of focus
t3	7	12	0	1	eating	out of focus
t3	7	13	0	1	eating	out of focus
t3	7	14	0	1	eating	out of focus
t3	7	15	0	1	eating	out of focus
t3	7	16	0	1	eating	out of focus
t3	7	17	0	1	eating	out of focus
t3	7	18	0	1	eating	out of focus
t3	8	0	0	1		out of focus
t3	8	1	0	1		out of focus
t3	8	2	0	1		out of focus
t3	8	3	0	1		out of focus
t3	8	4	0	1		out of focus
t3	8	5	0	1		out of focus
t3	8	6	0	1		out of focus
t3	8	7	0	1		out of focus
t3	8	8	0	1		out of focus
t3	8	9	0	1		out of focus
t3	8	10	0	1		out of focus
t3	8	11	0	1		out of focus
t3	8	12	0	1		out of focus
t3	8	13	0	1	eating	out of focus
t3	8	14	0	1	eating	out of focus
t3	8	15	0	1	eating	out of focus
t3	8	16	0	1	eating	out of focus
t3	8	17	0	1	eating	out of focus
t3	8	18	0	1	eating	out of focus
t3	9	0	0	0		out of focus
t3	9	1	1	0		out of focus
t3	9	2	1	0		out of focus
t3	9	3	1	0		out of focus
t3	9	4	1	0		out of focus
t3	9	5	0	1		out of focus
t3	9	6	0	1		out of focus
t3	9	7	0	1	eating	out of focus
t3	9	8	0	1	eating	out of focus
t3	9	9	0	1	eating	out of focus
t3	9	10	0	1	eating	out of focus
t3	9	11	0	1	eating	out of focus
t3	9	12	0	1	eating	out of focus
t3	9	13	0	1	eating	out of focus
t3	9	14	0	1	eating	out of focus
t3	9	15	0	1	eating	out of focus
t3	9	16	0	1	eating	out of focus
t3	9	17	0	1	eating	out of focus
t3	9	18	0	1	eating	out of focus
t3	10	0	1	0		out of focus
t3	10	1	0	0		out of focus
t3	10	2	1	0		out of focus
t3	10	3	1	0		out of focus
t3	10	4	1	0		out of focus
t3	10	5	1	0		out of focus
t3	10	6	1	0		out of focus
t3	10	7	1	0		out of focus
t3	10	8	0	1		out of focus
t3	10	9	0	1		out of focus
t3	10	10	0	1		out of focus
t3	10	11	0	1		out of focus
t3	10	12	0	1		out of focus
t3	10	13	0	1		out of focus
t3	10	14	0	1	eating	out of focus
t3	10	15	0	1	eating	out of focus
t3	10	16	0	1	eating	out of focus
t3	10	17	0	1	eating	out of focus
t3	10	18	0	1	eating	out of focus
t3	11	0	1	0		out of focus
t3	11	1	1	0		out of focus
t3	11	2	0	0		out of focus
t3	11	3	0	0		out of focus
t3	11	4	0	0		out of focus
t3	11	5	0	0		out of focus
t3	11	6	0	0		out of focus
t3	11	7	1	0		out of focus
t3	11	8	1	0		out of focus
t3	11	9	1	0		out of focus
t3	11	10	0	1		out of focus
t3	11	11	0	1		out of focus
t3	11	12	0	1		out of focus
t3	11	13	0	1	eating	out of focus
t3	11	14	0	1	eating	out of focus
t3	11	15	0	1	eating	out of focus
t3	11	16	0	1	eating	out of focus
t3	11	17	0	1	eating	out of focus
t3	11	18	0	1	eating	out of focus
t3	12	0	1	0		out of focus
t3	12	1	1	0		out of focus
t3	12	2	1	0		out of focus
t3	12	3	0	1		out of focus
t3	12	4	0	1		out of focus
t3	12	5	0	1		out of focus
t3	12	6	0	1		out of focus
t3	12	7	0	1		out of focus
t3	12	8	0	1		out of focus
t3	12	9	0	1		out of focus
t3	12	10	0	1	eating	out of focus
t3	12	11	0	1	eating	out of focus
t3	12	12	0	1	eating	out of focus
t3	12	13	0	1	eating	out of focus
t3	12	14	0	1	eating	out of focus
t3	12	15	0	1	eating	out of focus
t3	12	16	0	1	eating	out of focus
t3	12	17	0	1	eating	out of focus
t3	12	18	0	1	eating	out of focus
t3	13	0	0	1	very close to surface, but not mouth pointing down	out of focus
t3	13	1	0	0		out of focus
t3	13	2	1	0		out of focus
t3	13	3	1	0		out of focus
t3	13	4	0	1		out of focus
t3	13	5	0	1		out of focus
t3	13	6	0	1		out of focus
t3	13	7	0	1		out of focus
t3	13	8	0	1		out of focus
t3	13	9	0	1	eating	out of focus
t3	13	10	0	1	eating	out of focus
t3	13	11	0	1	eating	out of focus
t3	13	12	0	1	eating	out of focus
t3	13	13	0	1	eating	out of focus
t3	13	14	0	1	eating	out of focus
t3	13	15	0	1	eating	out of focus
t3	13	16	0	1	eating	out of focus
t3	13	17	0	1	eating	out of focus
t3	13	18	0	1	eating	out of focus
t3	14	0	1	0	within 1 cm from the surface	out of focus
t3	14	1	0	1		out of focus
t3	14	2	0	1		out of focus
t3	14	3	0	1		out of focus
t3	14	4	0	1		out of focus
t3	14	5	0	1		out of focus
t3	14	6	0	1		out of focus
t3	14	7	0	1		out of focus
t3	14	8	0	1		out of focus
t3	14	9	0	1		out of focus
t3	14	10	0	1		out of focus
t3	14	11	0	1	eating	out of focus
t3	14	12	0	0		out of focus
t3	14	13	1	0		out of focus
t3	14	14	1	0		out of focus
t3	14	15	1	0		out of focus
t3	14	16	0	1	eating	out of focus
t3	14	17	0	1	eating	out of focus
t3	14	18	0	1	eating	out of focus
t3	15	0	0	0		out of focus
t3	15	1	1	0		out of focus
t3	15	2	1	0		out of focus
t3	15	3	1	1		out of focus
t3	15	4	1	1		out of focus
t3	15	5	1	1		out of focus
t3	15	6	1	1		out of focus
t3	15	7	1	1		out of focus
t3	15	8	1	1	eating	out of focus
t3	15	9	1	1	eating	out of focus
t3	15	10	1	1	eating	out of focus
t3	15	11	1	1	eating	out of focus
t3	15	12	1	1	eating	out of focus
t3	15	13	1	1	eating	out of focus
t3	15	14	1	1	eating	out of focus
t3	15	15	1	1	eating	out of focus
t3	15	16	1	1	eating	out of focus
t3	15	17	1	1	eating	out of focus
t3	15	18	1	1	eating	out of focus
t3	16	0	0	0		out of focus
t3	16	1	0	0		out of focus
t3	16	2	0	0		out of focus
t3	16	3	1	0		out of focus
t3	16	4	1	0		out of focus
t3	16	5	1	0		out of focus
t3	16	6	0	1		out of focus
t3	16	7	0	1		out of focus
t3	16	8	0	1		out of focus
t3	16	9	0	1	eating	out of focus
t3	16	10	0	1	eating	out of focus
t3	16	11	0	1	eating	out of focus
t3	16	12	0	1	eating	out of focus
t3	16	13	0	1	eating	out of focus
t3	16	14	0	1	eating	out of focus
t3	16	15	0	1	eating	out of focus
t3	16	16	0	1	eating	out of focus
t3	16	17	0	1	eating	out of focus
t3	16	18	0	1	eating	out of focus
t3	17	0	0	0		out of focus
t3	17	1	0	0		out of focus
t3	17	2	0	0		out of focus
t3	17	3	1	0		out of focus
t3	17	4	1	0		out of focus
t3	17	5	0	1	Fish seemed agitated?	out of focus
t3	17	6	0	0		out of focus
t3	17	7	0	0		out of focus
t3	17	8	0	0		out of focus
t3	17	9	0	0		out of focus
t3	17	10	0	0		out of focus
t3	17	11	1	0		out of focus
t3	17	12	0	1		out of focus
t3	17	13	0	1		out of focus
t3	17	14	0	1		out of focus
t3	17	15	0	1		out of focus
t3	17	16	0	1		out of focus
t3	17	17	0	0	Fish seemed agitated?	out of focus
t3	17	18	0	0	Fish seemed agitated?	out of focus
t3	18	0	0	0		out of focus
t3	18	1	0	0		out of focus
t3	18	2	1	0		out of focus
t3	18	3	0	1		out of focus
t3	18	4	0	1		out of focus
t3	18	5	0	1		out of focus
t3	18	6	0	1		out of focus
t3	18	7	0	1		out of focus
t3	18	8	0	1		out of focus
t3	18	9	0	1		out of focus
t3	18	10	0	1		out of focus
t3	18	11	0	1		out of focus
t3	18	12	0	1		out of focus
t3	18	13	0	1		out of focus
t3	18	14	0	1	eating	out of focus
t3	18	15	0	1	eating	out of focus
t3	18	16	0	1	eating	out of focus
t3	18	17	0	1	eating	out of focus
t3	18	18	0	1	eating	out of focus
t3	19	0	0	0		out of focus
t3	19	1	0	0		out of focus
t3	19	2	1	0		out of focus
t3	19	3	1	0		out of focus
t3	19	4	0	1		out of focus
t3	19	5	0	1		out of focus
t3	19	6	0	1		out of focus
t3	19	7	0	1		out of focus
t3	19	8	0	1		out of focus
t3	19	9	0	1	eating	out of focus
t3	19	10	0	1	eating	out of focus
t3	19	11	0	1	eating	out of focus
t3	19	12	0	1	eating	out of focus
t3	19	13	0	1	eating	out of focus
t3	19	14	0	1	eating	out of focus
t3	19	15	0	1	eating	out of focus
t3	19	16	0	1	eating	out of focus
t3	19	17	0	1	eating	out of focus
t3	19	18	0	1	eating	out of focus
t3	20	0	1	0		out of focus
t3	20	1	0	0		out of focus
t3	20	2	0	0		out of focus
t3	20	3	1	0		out of focus
t3	20	4	1	0		out of focus
t3	20	5	0	1		out of focus
t3	20	6	0	1		out of focus
t3	20	7	0	1		out of focus
t3	20	8	0	1		out of focus
t3	20	9	0	1		out of focus
t3	20	10	0	1		out of focus
t3	20	11	0	1		out of focus
t3	20	12	0	1		out of focus
t3	20	13	0	1		out of focus
t3	20	14	0	1		out of focus
t3	20	15	0	1	eating	out of focus
t3	20	16	0	1	eating	out of focus
t3	20	17	0	1	eating	out of focus
t3	20	18	0	1	eating	out of focus
t3	21	0	1	0		out of focus
t3	21	1	0	0		out of focus
t3	21	2	1	0		out of focus
t3	21	3	1	0		out of focus
t3	21	4	0	1		out of focus
t3	21	5	0	1		out of focus
t3	21	6	0	1	eating	out of focus
t3	21	7	0	1	eating	out of focus
t3	21	8	0	1	eating	out of focus
t3	21	9	0	1	eating	out of focus
t3	21	10	0	1	eating	out of focus
t3	21	11	0	1	eating	out of focus
t3	21	12	0	1	eating	out of focus
t3	21	13	0	1	eating	out of focus
t3	21	14	0	1	eating	out of focus
t3	21	15	0	1	eating	out of focus
t3	21	16	0	1	eating	out of focus
t3	21	17	0	1	eating	out of focus
t3	21	18	0	1	eating	out of focus

## Sheet: Fish_5
Animal ID (WT)	Video #	Second #	Animal Moving Upward? (any displacement toward the light's direction, inferred from the position the next second) (1 = yes; 0 = no)	Animal at Surface? (1 = yes; 0 = no)	Behavior Notes	Video Quality Notes	Other notes
t5	0	0	0	0		out of focus, dark
t5	0	1	0	0
t5	0	2	0	0
t5	0	3	0	0
t5	0	4	0	0
t5	0	5	0	0
t5	0	6	0	0
t5	0	7	0	0
t5	0	8	0	0
t5	0	9	0	0
t5	0	10	0	0
t5	0	11	0	0
t5	0	12	0	0
t5	0	13	0	0
t5	0	14	0	0
t5	0	15	0	0
t5	0	16	0	0
t5	0	17	0	0
t5	0	18	0	0
t5	1	0	1	0
t5	1	1	0	0
t5	1	2	0	0
t5	1	3	0	0
t5	1	4	0	0
t5	1	5	0	0
t5	1	6	0	0
t5	1	7	1	0
t5	1	8	1	0
t5	1	9	1	0
t5	1	10	1	0
t5	1	11	1	0
t5	1	12	0	1
t5	1	13	0	0	within 3 cm from surface
t5	1	14	0	0	within 3 cm from surface
t5	1	15	1	0	within 3 cm from surface
t5	1	16	0	0	within 3 cm from surface
t5	1	17	0	0	within 3 cm from surface
t5	1	18	0	1	eating
t5	2	0	0	0
t5	2	1	0	0
t5	2	2	1	0
t5	2	3	1	0
t5	2	4	1	0
t5	2	5	0	0
t5	2	6	0	0
t5	2	7	0	0
t5	2	8	0	0
t5	2	9	0	0
t5	2	10	0	0
t5	2	11	0	0
t5	2	12	0	0
t5	2	13	0	0
t5	2	14	1	0
t5	2	15	1	0
t5	2	16	1	0
t5	2	17	1	0
t5	2	18	1	0
t5	3	0	0	0
t5	3	1	0	0
t5	3	2	0	0
t5	3	3	0	0
t5	3	4	0	0
t5	3	5	0	0
t5	3	6	0	0
t5	3	7	0	0
t5	3	8	0	0
t5	3	9	0	0
t5	3	10	0	0
t5	3	11	0	0
t5	3	12	0	0
t5	3	13	0	0
t5	3	14	0	0
t5	3	15	0	0
t5	3	16	0	0
t5	3	17	0	0
t5	3	18	0	0
t5	4	0	0	1	within 1 cm from surface, reflection can only seen in the first frame.
t5	4	1	0	0	within 1 cm from surface
t5	4	2	0	0
t5	4	3	0	0
t5	4	4	0	0
t5	4	5	0	0
t5	4	6	0	0
t5	4	7	0	0
t5	4	8	0	0
t5	4	9	0	0
t5	4	10	0	0
t5	4	11	0	0
t5	4	12	0	0
t5	4	13	0	0
t5	4	14	0	0
t5	4	15	0	0
t5	4	16	0	0
t5	4	17	0	0
t5	4	18	0	0
t5	5	0	0	0	within 1 cm from surface, but not at surface
t5	5	1	0	0
t5	5	2	0	0
t5	5	3	0	0
t5	5	4	0	0
t5	5	5	0	0
t5	5	6	0	0
t5	5	7	0	0
t5	5	8	0	0
t5	5	9	0	0
t5	5	10	0	0
t5	5	11	1	0
t5	5	12	1	0
t5	5	13	1	0
t5	5	14	1	0
t5	5	15	1	0
t5	5	16	1	0
t5	5	17	1	0
t5	5	18	1	0	ultimately reaches the surface and eating
t5	6	0	0	0
t5	6	1	0	0
t5	6	2	0	0
t5	6	3	0	0
t5	6	4	0	0
t5	6	5	0	0
t5	6	6	0	0
t5	6	7	1	0
t5	6	8	1	0
t5	6	9	1	0
t5	6	10	1	0
t5	6	11	1	0
t5	6	12	1	0
t5	6	13	0	1
t5	6	14	0	1
t5	6	15	0	1
t5	6	16	0	1
t5	6	17	0	1	eating
t5	6	18	0	1
t5	7	0	1	0
t5	7	1	1	0
t5	7	2	1	0
t5	7	3	1	0
t5	7	4	1	0
t5	7	5	0	1
t5	7	6	0	1
t5	7	7	0	1	unclear if it's eating
t5	7	8	0	1	unclear if it's eating
t5	7	9	0	1	unclear if it's eating
t5	7	10	0	1	unclear if it's eating
t5	7	11	0	1	unclear if it's eating
t5	7	12	0	1	unclear if it's eating
t5	7	13	0	1	unclear if it's eating
t5	7	14	0	1	unclear if it's eating
t5	7	15	0	1	unclear if it's eating
t5	7	16	0	1	unclear if it's eating
t5	7	17	0	1	unclear if it's eating
t5	7	18	0	1	unclear if it's eating
t5	8	0	0	0
t5	8	1	1	0
t5	8	2	0	0
t5	8	3	0	0
t5	8	4	1	0
t5	8	5	1	0
t5	8	6	1	0
t5	8	7	1	0
t5	8	8	0	0
t5	8	9	0	0
t5	8	10	0	0
t5	8	11	0	0
t5	8	12	1	0
t5	8	13	1	0
t5	8	14	1	0
t5	8	15	1	0
t5	8	16	0	1
t5	8	17	0	1
t5	8	18	0	1	ultimately eating
t5	9	0	0	0
t5	9	1	0	0
t5	9	2	1	0
t5	9	3	1	0
t5	9	4	1	0
t5	9	5	1	0
t5	9	6	0	1
t5	9	7	0	1	eating
t5	9	8	0	1	eating
t5	9	9	0	1	eating
t5	9	10	0	1	eating
t5	9	11	0	1	eating
t5	9	12	0	1	eating
t5	9	13	0	1	eating
t5	9	14	0	1	eating
t5	9	15	0	1	eating
t5	9	16	0	1	eating
t5	9	17	0	1	eating
t5	9	18	0	1	eating
t5	10	0	0	0
t5	10	1	0	0
t5	10	2	0	0
t5	10	3	1	0
t5	10	4	1	0
t5	10	5	1	0
t5	10	6	1	0
t5	10	7	0	1
t5	10	8	0	1
t5	10	9	0	1
t5	10	10	0	1
t5	10	11	0	1
t5	10	12	0	1
t5	10	13	0	1
t5	10	14	0	1
t5	10	15	0	1
t5	10	16	0	1
t5	10	17	0	1
t5	10	18	0	1	ultimately eating
t5	11	0	1	0
t5	11	1	1	0
t5	11	2	1	0
t5	11	3	1	0
t5	11	4	1	0
t5	11	5	0	1
t5	11	6	0	1
t5	11	7	0	1
t5	11	8	0	1
t5	11	9	0	1
t5	11	10	0	1
t5	11	11	0	1
t5	11	12	0	1
t5	11	13	0	1
t5	11	14	0	1
t5	11	15	0	1
t5	11	16	0	1
t5	11	17	0	1
t5	11	18	0	1	ultimately eating
t5	12	0	1	0
t5	12	1	1	0
t5	12	2	1	0
t5	12	3	1	0
t5	12	4	1	0
t5	12	5	1	0
t5	12	6	0	1
t5	12	7	0	1
t5	12	8	0	1	eating
t5	12	9	0	1	eating
t5	12	10	0	1	eating
t5	12	11	0	1	eating
t5	12	12	0	1	eating
t5	12	13	0	1	eating
t5	12	14	0	1	eating
t5	12	15	0	1	eating
t5	12	16	0	1	eating
t5	12	17	0	1	eating
t5	12	18	0	1	eating
t5	13	0	0	1
t5	13	1	0	1
t5	13	2	0	1
t5	13	3	0	1
t5	13	4	0	1
t5	13	5	0	1
t5	13	6	0	1
t5	13	7	0	1
t5	13	8	0	1
t5	13	9	0	1
t5	13	10	0	1
t5	13	11	0	1
t5	13	12	0	1
t5	13	13	0	1
t5	13	14	0	1
t5	13	15	0	1
t5	13	16	0	1
t5	13	17	0	1
t5	13	18	0	1	ultimately eating
t5	14	0	1	0
t5	14	1	0	1
t5	14	2	0	1
t5	14	3	0	1
t5	14	4	0	1	eating
t5	14	5	0	1	eating
t5	14	6	0	1	eating
t5	14	7	0	1	eating
t5	14	8	0	1	eating
t5	14	9	0	1	eating
t5	14	10	0	1	eating
t5	14	11	0	1	eating
t5	14	12	0	1	eating
t5	14	13	0	1	eating
t5	14	14	0	1	eating
t5	14	15	0	1	eating
t5	14	16	0	1	eating
t5	14	17	0	1	eating
t5	14	18	0	1	eating
t5	15	0	0	0
t5	15	1	1	0
t5	15	2	1	0
t5	15	3	1	0
t5	15	4	0	1
t5	15	5	0	1
t5	15	6	0	1
t5	15	7	0	1	eating
t5	15	8	0	1	eating
t5	15	9	0	1	eating
t5	15	10	0	1	eating
t5	15	11	0	1	eating
t5	15	12	0	1	eating
t5	15	13	0	1	eating
t5	15	14	0	1	eating
t5	15	15	0	1	eating
t5	15	16	0	1	eating
t5	15	17	0	1	eating
t5	15	18	0	1	eating
t5	16	0	0	0
t5	16	1	0	0
t5	16	2	0	0
t5	16	3	0	0
t5	16	4	0	0
t5	16	5	0	0
t5	16	6	1	0
t5	16	7	1	0
t5	16	8	1	0
t5	16	9	0	1	eating
t5	16	10	0	1	eating
t5	16	11	0	1	eating
t5	16	12	0	1	eating
t5	16	13	0	1	eating
t5	16	14	0	1	eating
t5	16	15	0	1	eating
t5	16	16	0	1	eating
t5	16	17	0	1	eating
t5	16	18	0	1	eating
t5	17	0	0	0
t5	17	1	0	0
t5	17	2	0	0
t5	17	3	1	0
t5	17	4	0	0
t5	17	5	0	0
t5	17	6	0	0
t5	17	7	1	0
t5	17	8	1	0
t5	17	9	0	1
t5	17	10	0	1
t5	17	11	0	1
t5	17	12	0	1
t5	17	13	0	1
t5	17	14	0	1
t5	17	15	0	1	eating
t5	17	16	0	1	eating
t5	17	17	0	1	eating
t5	17	18	0	1	eating
t5	18	0	0	0
t5	18	1	1	0
t5	18	2	1	0
t5	18	3	1	0
t5	18	4	0	1
t5	18	5	0	1
t5	18	6	0	1
t5	18	7	0	1
t5	18	8	0	1	eating
t5	18	9	0	1	eating
t5	18	10	0	1	eating
t5	18	11	0	1	eating
t5	18	12	0	1	eating
t5	18	13	0	1	eating
t5	18	14	0	1	eating
t5	18	15	0	1	eating
t5	18	16	0	1	eating
t5	18	17	0	1	eating
t5	18	18	0	1	eating
t5	19	0	0	0
t5	19	1	0	0
t5	19	2	0	0
t5	19	3	0	0
t5	19	4	0	0
t5	19	5	0	0
t5	19	6	1	0
t5	19	7	1	0
t5	19	8	1	0
t5	19	9	1	0
t5	19	10	0	0	fish turns around and moves down (to avoid water stream?)
t5	19	11	0	0	fish moves down (to avoid water stream?)
t5	19	12	1	0
t5	19	13	1	0
t5	19	14	0	1	eating
t5	19	15	0	1	eating
t5	19	16	0	1	eating
t5	19	17	0	1	eating
t5	19	18	0	1	eating
t5	20	0	0	0
t5	20	1	0	0
t5	20	2	1	0
t5	20	3	1	0
t5	20	4	1	0
t5	20	5	1	0
t5	20	6	0	1
t5	20	7	0	1
t5	20	8	0	1
t5	20	9	0	1	eating
t5	20	10	0	1	eating
t5	20	11	0	1	eating
t5	20	12	0	1	eating
t5	20	13	0	1	eating
t5	20	14	0	1	eating
t5	20	15	0	1	eating
t5	20	16	0	1	eating
t5	20	17	0	1	eating
t5	20	18	0	1	eating
t5	21	0	0	0
t5	21	1	0	0
t5	21	2	0	0
t5	21	3	1	0
t5	21	4	1	0
t5	21	5	1	0
t5	21	6	1	0
t5	21	7	0	1
t5	21	8	0	1	eating
t5	21	9	0	1	eating
t5	21	10	0	1	eating
t5	21	11	0	1	eating
t5	21	12	0	0
t5	21	13	1	0
t5	21	14	1	0
t5	21	15	0	1
t5	21	16	0	1
t5	21	17	0	1
t5	21	18	0	1

## Sheet: Fish_13
Animal ID (WT)	Video #	Second #	Animal Moving Upward? (any displacement toward the light's direction, inferred from the position the next second) (1 = yes; 0 = no)	Animal at Surface? (1 = yes; 0 = no)	Behavior Notes	Video Quality Notes	Other notes
t13	0	0	0	0	Fish at the bottom of the tank	Out of focus
t13	0	1	0	0	Fish at the bottom of the tank	Out of focus
t13	0	2	0	0	Fish at the bottom of the tank	Out of focus
t13	0	3	0	0	Fish at the bottom of the tank	Out of focus
t13	0	4	0	0	Fish at the bottom of the tank	Out of focus
t13	0	5	0	0	Fish at the bottom of the tank	Out of focus
t13	0	6	0	0	Fish at the bottom of the tank	Out of focus
t13	0	7	0	0	Fish at the bottom of the tank	Out of focus
t13	0	8	0	0	Fish at the bottom of the tank	Out of focus
t13	0	9	0	0	Fish at the bottom of the tank	Out of focus
t13	0	10	0	0	Fish at the bottom of the tank	Out of focus
t13	0	11	0	0	Fish at the bottom of the tank	Out of focus
t13	0	12	0	0	Fish at the bottom of the tank	Out of focus
t13	0	13	0	0	Fish at the bottom of the tank	Out of focus
t13	0	14	0	0	Fish at the bottom of the tank	Out of focus
t13	0	15	0	0	Fish at the bottom of the tank	Out of focus
t13	0	16	0	0	Fish at the bottom of the tank	Out of focus
t13	0	17	0	0	Fish at the bottom of the tank	Out of focus
t13	0	18	0	0	Fish at the bottom of the tank	Out of focus
t13	1	0	0	0	Fish at the bottom of the tank	Out of focus. Video is dark
t13	1	1	0	0	Fish at the bottom of the tank	Out of focus. Video is dark
t13	1	2	0	0	Fish at the bottom of the tank	Out of focus. Video is dark
t13	1	3	0	0	Fish at the bottom of the tank	Out of focus. Video is dark
t13	1	4	0	0	Fish at the bottom of the tank	Out of focus. Video is dark
t13	1	5	0	0	Fish at the bottom of the tank	Out of focus. Video is dark
t13	1	6	0	0	Fish at the bottom of the tank	Out of focus. Video is dark
t13	1	7	0	0	Fish at the bottom of the tank	Out of focus. Video is dark
t13	1	8	0	0	Fish at the bottom of the tank	Out of focus. Video is dark
t13	1	9	0	0	Fish at the bottom of the tank	Out of focus. Video is dark
t13	1	10	0	0	Fish at the bottom of the tank	Out of focus. Video is dark
t13	1	11	0	0	Fish at the bottom of the tank	Out of focus. Video is dark
t13	1	12	0	0	Fish at the bottom of the tank	Out of focus. Video is dark
t13	1	13	0	0	Fish at the bottom of the tank	Out of focus. Video is dark
t13	1	14	0	0	Fish at the bottom of the tank	Out of focus. Video is dark
t13	1	15	0	0	Fish at the bottom of the tank	Out of focus. Video is dark
t13	1	16	0	0	Fish at the bottom of the tank	Out of focus. Video is dark
t13	1	17	0	0	Fish at the bottom of the tank	Out of focus. Video is dark
t13	1	18	0	0	Fish at the bottom of the tank	Out of focus. Video is dark
t13	2	0	0	0	Fish at the bottom of the tank	Out of focus. Video is dark
t13	2	1	0	0	Fish at the bottom of the tank	Out of focus. Video is dark
t13	2	2	0	0	Fish at the bottom of the tank	Out of focus. Video is dark
t13	2	3	0	0	Fish at the bottom of the tank	Out of focus. Video is dark
t13	2	4	0	0	Fish at the bottom of the tank	Out of focus. Video is dark
t13	2	5	0	0	Fish at the bottom of the tank	Out of focus. Video is dark
t13	2	6	0	0	Fish at the bottom of the tank	Out of focus. Video is dark
t13	2	7	0	0	Fish at the bottom of the tank	Out of focus. Video is dark
t13	2	8	0	0	Fish at the bottom of the tank	Out of focus. Video is dark
t13	2	9	0	0	Fish at the bottom of the tank	Out of focus. Video is dark
t13	2	10	0	0	Fish at the bottom of the tank	Out of focus. Video is dark
t13	2	11	0	0	Fish at the bottom of the tank	Out of focus. Video is dark
t13	2	12	0	0	Fish at the bottom of the tank	Out of focus. Video is dark
t13	2	13	0	0	Fish at the bottom of the tank	Out of focus. Video is dark
t13	2	14	0	0	Fish at the bottom of the tank	Out of focus. Video is dark
t13	2	15	0	0	Fish at the bottom of the tank	Out of focus. Video is dark
t13	2	16	0	0	Fish at the bottom of the tank	Out of focus. Video is dark
t13	2	17	0	0	Fish at the bottom of the tank	Out of focus. Video is dark
t13	2	18	0	0	Fish at the bottom of the tank	Out of focus. Video is dark
t13	3	0	0	0		Out of focus. Video is dark
t13	3	1	0	0	Fish moves downward and stays at bottom	Out of focus. Video is dark
t13	3	2	0	0	Fish at the bottom of the tank	Out of focus. Video is dark
t13	3	3	0	0	Fish at the bottom of the tank	Out of focus. Video is dark
t13	3	4	0	0	Fish at the bottom of the tank	Out of focus. Video is dark
t13	3	5	0	0	Fish at the bottom of the tank	Out of focus. Video is dark
t13	3	6	0	0	Fish at the bottom of the tank	Out of focus. Video is dark
t13	3	7	0	0	Fish at the bottom of the tank	Out of focus. Video is dark
t13	3	8	0	0	Fish at the bottom of the tank	Out of focus. Video is dark
t13	3	9	0	0	Fish at the bottom of the tank	Out of focus. Video is dark
t13	3	10	0	0	Fish at the bottom of the tank	Out of focus. Video is dark
t13	3	11	0	0	Fish at the bottom of the tank	Out of focus. Video is dark
t13	3	12	0	0	Fish at the bottom of the tank	Out of focus. Video is dark
t13	3	13	0	0	Fish at the bottom of the tank	Out of focus. Video is dark
t13	3	14	0	0	Fish at the bottom of the tank	Out of focus. Video is dark
t13	3	15	0	0	Fish at the bottom of the tank	Out of focus. Video is dark
t13	3	16	0	0	Fish at the bottom of the tank	Out of focus. Video is dark
t13	3	17	0	0	Fish at the bottom of the tank	Out of focus. Video is dark
t13	3	18	0	0	Fish at the bottom of the tank	Out of focus. Video is dark
t13	4	0	0	0		Out of focus. Video is dark
t13	4	1	0	0		Out of focus. Video is dark
t13	4	2	0	0		Out of focus. Video is dark
t13	4	3	0	0		Out of focus. Video is dark
t13	4	4	0	0		Out of focus. Video is dark
t13	4	5	0	0		Out of focus. Video is dark
t13	4	6	0	0		Out of focus. Video is dark
t13	4	7	0	0		Out of focus. Video is dark
t13	4	8	0	0		Out of focus. Video is dark
t13	4	9	0	0		Out of focus. Video is dark
t13	4	10	0	0		Out of focus. Video is dark
t13	4	11	0	0		Out of focus. Video is dark
t13	4	12	0	0		Out of focus. Video is dark
t13	4	13	0	0		Out of focus. Video is dark
t13	4	14	0	0		Out of focus. Video is dark
t13	4	15	1	0		Out of focus. Video is dark
t13	4	16	1	0		Out of focus. Video is dark
t13	4	17	1	0		Out of focus. Video is dark
t13	4	18	0	0		Out of focus. Video is dark
t13	5	0	0	0	Fish at the bottom of the tank	Out of focus. Video is dark
t13	5	1	0	0	Fish at the bottom of the tank	Out of focus. Video is dark
t13	5	2	0	0	Fish at the bottom of the tank	Out of focus. Video is dark
t13	5	3	0	0	Fish at the bottom of the tank	Out of focus. Video is dark
t13	5	4	0	0	Fish at the bottom of the tank	Out of focus. Video is dark
t13	5	5	0	0	Fish at the bottom of the tank	Out of focus. Video is dark
t13	5	6	0	0	Fish at the bottom of the tank	Out of focus. Video is dark
t13	5	7	0	0	Fish at the bottom of the tank	Out of focus. Video is dark
t13	5	8	0	0	Fish at the bottom of the tank	Out of focus. Video is dark
t13	5	9	0	0	Fish at the bottom of the tank	Out of focus. Video is dark
t13	5	10	0	0	Fish at the bottom of the tank	Out of focus. Video is dark
t13	5	11	0	0	Fish at the bottom of the tank	Out of focus. Video is dark
t13	5	12	0	0	Fish at the bottom of the tank	Out of focus. Video is dark
t13	5	13	0	0	Fish at the bottom of the tank	Out of focus. Video is dark
t13	5	14	0	0	Fish at the bottom of the tank	Out of focus. Video is dark
t13	5	15	0	0	Fish at the bottom of the tank	Out of focus. Video is dark
t13	5	16	0	0	Fish at the bottom of the tank	Out of focus. Video is dark
t13	5	17	0	0	Fish at the bottom of the tank	Out of focus. Video is dark
t13	5	18	0	0	Fish at the bottom of the tank	Out of focus. Video is dark
t13	6	0	0	0	Fish at the bottom quarter of the tank	Out of focus. Video is very dark
t13	6	1	0	0	Fish at the bottom quarter of the tank	Out of focus. Video is very dark
t13	6	2	0	0	Fish at the bottom quarter of the tank	Out of focus. Video is very dark
t13	6	3	0	0	Fish at the bottom quarter of the tank	Out of focus. Video is very dark
t13	6	4	0	0	Fish at the bottom quarter of the tank	Out of focus. Video is very dark
t13	6	5	0	0	Fish at the bottom quarter of the tank	Out of focus. Video is very dark
t13	6	6	0	0	Fish at the bottom quarter of the tank	Out of focus. Video is very dark
t13	6	7	0	0	Fish at the bottom quarter of the tank	Out of focus. Video is very dark
t13	6	8	0	0	Fish at the bottom quarter of the tank	Out of focus. Video is very dark
t13	6	9	0	0	Fish at the bottom quarter of the tank	Out of focus. Video is very dark
t13	6	10	0	0	Fish at the bottom quarter of the tank	Out of focus. Video is very dark
t13	6	11	0	0	Fish at the bottom quarter of the tank	Out of focus. Video is very dark
t13	6	12	0	0	Fish at the bottom quarter of the tank	Out of focus. Video is very dark
t13	6	13	0	0	Fish at the bottom quarter of the tank	Out of focus. Video is very dark
t13	6	14	0	0	Fish at the bottom quarter of the tank	Out of focus. Video is very dark
t13	6	15	0	0	Fish at the bottom quarter of the tank	Out of focus. Video is very dark
t13	6	16	0	0	Fish at the bottom quarter of the tank	Out of focus. Video is very dark
t13	6	17	0	0	Fish at the bottom quarter of the tank	Out of focus. Video is very dark
t13	6	18	0	0	Fish at the bottom quarter of the tank	Out of focus. Video is very dark
t13	7	0	0	0	Fish at the bottom of the tank	Out of focus. Video is dark
t13	7	1	0	0	Fish at the bottom of the tank	Out of focus. Video is dark
t13	7	2	0	0	Fish at the bottom of the tank	Out of focus. Video is dark
t13	7	3	0	0	Fish at the bottom of the tank	Out of focus. Video is dark
t13	7	4	0	0	Fish at the bottom of the tank	Out of focus. Video is dark
t13	7	5	1	0	Fish at the bottom of the tank	Out of focus. Video is dark
t13	7	6	0	0	Fish at the bottom of the tank	Out of focus. Video is dark
t13	7	7	0	0	Fish at the bottom of the tank	Out of focus. Video is dark
t13	7	8	0	0	Fish at the bottom of the tank	Out of focus. Video is dark
t13	7	9	0	0	Fish at the bottom of the tank	Out of focus. Video is dark
t13	7	10	0	0	Fish at the bottom of the tank	Out of focus. Video is dark
t13	7	11	0	0	Fish at the bottom of the tank	Out of focus. Video is dark
t13	7	12	0	0	Fish at the bottom of the tank	Out of focus. Video is dark
t13	7	13	0	0	Fish at the bottom of the tank	Out of focus. Video is dark
t13	7	14	0	0	Fish at the bottom of the tank	Out of focus. Video is dark
t13	7	15	0	0	Fish at the bottom of the tank	Out of focus. Video is dark
t13	7	16	0	0	Fish at the bottom of the tank	Out of focus. Video is dark
t13	7	17	0	0	Fish at the bottom of the tank	Out of focus. Video is dark
t13	7	18	0	0	Fish at the bottom of the tank	Out of focus. Video is dark
t13	8	0	0	0		Out of focus. Video is dark
t13	8	1	0	0		Out of focus. Video is dark
t13	8	2	0	0		Out of focus. Video is dark
t13	8	3	1	0		Out of focus. Video is dark
t13	8	4	1	0		Out of focus. Video is dark
t13	8	5	0	0		Out of focus. Video is dark
t13	8	6	0	0		Out of focus. Video is dark
t13	8	7	0	0		Out of focus. Video is dark
t13	8	8	0	0		Out of focus. Video is dark
t13	8	9	0	0		Out of focus. Video is dark
t13	8	10	1	0		Out of focus. Video is dark
t13	8	11	1	0		Out of focus. Video is dark
t13	8	12	1	0		Out of focus. Video is dark
t13	8	13	1	0		Out of focus. Video is dark
t13	8	14	0	1	eating	Out of focus. Video is dark
t13	8	15	0	1	eating	Out of focus. Video is dark
t13	8	16	0	1	eating	Out of focus. Video is dark
t13	8	17	0	1	eating	Out of focus. Video is dark
t13	8	18	0	1	eating	Out of focus. Video is dark
t13	9	0	0	0		Out of focus. Video is dark
t13	9	1	0	0		Out of focus. Video is dark
t13	9	2	0	0		Out of focus. Video is dark
t13	9	3	1	0		Out of focus. Video is dark
t13	9	4	1	0		Out of focus. Video is dark
t13	9	5	1	0		Out of focus. Video is dark
t13	9	6	1	0		Out of focus. Video is dark
t13	9	7	1	0		Out of focus. Video is dark
t13	9	8	1	0		Out of focus. Video is dark
t13	9	9	0	0		Out of focus. Video is dark
t13	9	10	0	0		Out of focus. Video is dark
t13	9	11	1	0		Out of focus. Video is dark
t13	9	12	0	1		Out of focus. Video is dark
t13	9	13	0	1	eating	Out of focus. Video is dark
t13	9	14	0	1	eating	Out of focus. Video is dark
t13	9	15	0	1	eating	Out of focus. Video is dark
t13	9	16	0	1	eating	Out of focus. Video is dark
t13	9	17	0	1	eating	Out of focus. Video is dark
t13	9	18	0	1	eating	Out of focus. Video is dark
t13	10	0	0	0		Out of focus. Video is dark
t13	10	1	0	0		Out of focus. Video is dark
t13	10	2	0	0		Out of focus. Video is dark
t13	10	3	0	0		Out of focus. Video is dark
t13	10	4	0	0		Out of focus. Video is dark
t13	10	5	0	0		Out of focus. Video is dark
t13	10	6	0	0		Out of focus. Video is dark
t13	10	7	0	0		Out of focus. Video is dark
t13	10	8	0	0		Out of focus. Video is dark
t13	10	9	0	0		Out of focus. Video is dark
t13	10	10	1	0		Out of focus. Video is dark
t13	10	11	1	0		Out of focus. Video is dark
t13	10	12	1	0		Out of focus. Video is dark
t13	10	13	1	0		Out of focus. Video is dark
t13	10	14	1	0		Out of focus. Video is dark
t13	10	15	0	1	eating	Out of focus. Video is dark
t13	10	16	0	1	eating	Out of focus. Video is dark
t13	10	17	0	1	eating	Out of focus. Video is dark
t13	10	18	0	1	eating	Out of focus. Video is dark
t13	11	0	0	0		Out of focus. Video is dark
t13	11	1	0	0		Out of focus. Video is dark
t13	11	2	0	0		Out of focus. Video is dark
t13	11	3	1	0		Out of focus. Video is dark
t13	11	4	1	0	animal seems startled by water stream?	Out of focus. Video is dark
t13	11	5	0	0		Out of focus. Video is dark
t13	11	6	0	0		Out of focus. Video is dark
t13	11	7	0	0		Out of focus. Video is dark
t13	11	8	1	0		Out of focus. Video is dark
t13	11	9	1	0		Out of focus. Video is dark
t13	11	10	0	0		Out of focus. Video is dark
t13	11	11	0	0		Out of focus. Video is dark
t13	11	12	0	0		Out of focus. Video is dark
t13	11	13	0	0		Out of focus. Video is dark
t13	11	14	0	0		Out of focus. Video is dark
t13	11	15	0	0		Out of focus. Video is dark
t13	11	16	1	0		Out of focus. Video is dark
t13	11	17	1	0		Out of focus. Video is dark
t13	11	18	0	1	ultimately eating	Out of focus. Video is dark
t13	12	0	0	0		Out of focus. Video is dark
t13	12	1	0	0		Out of focus. Video is dark
t13	12	2	0	0		Out of focus. Video is dark
t13	12	3	0	0		Out of focus. Video is dark
t13	12	4	0	0		Out of focus. Video is dark
t13	12	5	0	0		Out of focus. Video is dark
t13	12	6	0	0		Out of focus. Video is dark
t13	12	7	0	0		Out of focus. Video is dark
t13	12	8	0	0		Out of focus. Video is dark
t13	12	9	0	0		Out of focus. Video is dark
t13	12	10	0	0		Out of focus. Video is dark
t13	12	11	0	0		Out of focus. Video is dark
t13	12	12	0	0		Out of focus. Video is dark
t13	12	13	1	0		Out of focus. Video is dark
t13	12	14	1	0		Out of focus. Video is dark
t13	12	15	1	0		Out of focus. Video is dark
t13	12	16	0	1	eating	Out of focus. Video is dark
t13	12	17	0	1	eating	Out of focus. Video is dark
t13	12	18	0	1	eating	Out of focus. Video is dark
t13	13	0	0	0		Out of focus. Video is dark
t13	13	1	0	0		Out of focus. Video is dark
t13	13	2	0	0		Out of focus. Video is dark
t13	13	3	1	0		Out of focus. Video is dark
t13	13	4	1	0		Out of focus. Video is dark
t13	13	5	1	0		Out of focus. Video is dark
t13	13	6	1	0		Out of focus. Video is dark
t13	13	7	1	0		Out of focus. Video is dark
t13	13	8	0	1		Out of focus. Video is dark
t13	13	9	0	1		Out of focus. Video is dark
t13	13	10	0	1	eating	Out of focus. Video is dark
t13	13	11	0	1	eating	Out of focus. Video is dark
t13	13	12	0	1	eating	Out of focus. Video is dark
t13	13	13	0	1	eating	Out of focus. Video is dark
t13	13	14	0	1	eating	Out of focus. Video is dark
t13	13	15	0	1	eating	Out of focus. Video is dark
t13	13	16	0	1	eating	Out of focus. Video is dark
t13	13	17	0	1	eating	Out of focus. Video is dark
t13	13	18	0	1	eating	Out of focus. Video is dark
t13	14	0	1	0		Out of focus. Video is dark
t13	14	1	0	0		Out of focus. Video is dark
t13	14	2	0	0		Out of focus. Video is dark
t13	14	3	0	0		Out of focus. Video is dark
t13	14	4	0	0		Out of focus. Video is dark
t13	14	5	0	0		Out of focus. Video is dark
t13	14	6	0	0		Out of focus. Video is dark
t13	14	7	0	0		Out of focus. Video is dark
t13	14	8	0	0		Out of focus. Video is dark
t13	14	9	0	0		Out of focus. Video is dark
t13	14	10	0	0		Out of focus. Video is dark
t13	14	11	0	0		Out of focus. Video is dark
t13	14	12	0	0		Out of focus. Video is dark
t13	14	13	0	0		Out of focus. Video is dark
t13	14	14	0	0		Out of focus. Video is dark
t13	14	15	0	0		Out of focus. Video is dark
t13	14	16	0	0		Out of focus. Video is dark
t13	14	17	0	0		Out of focus. Video is dark
t13	14	18	1	0		Out of focus. Video is dark
t13	15	0	0	0		Out of focus. Video is dark
t13	15	1	0	0		Out of focus. Video is dark
t13	15	2	0	0		Out of focus. Video is dark
t13	15	3	1	0		Out of focus. Video is dark
t13	15	4	1	0		Out of focus. Video is dark
t13	15	5	1	0		Out of focus. Video is dark
t13	15	6	1	0		Out of focus. Video is dark
t13	15	7	1	0		Out of focus. Video is dark
t13	15	8	1	0		Out of focus. Video is dark
t13	15	9	0	1		Out of focus. Video is dark
t13	15	10	0	1		Out of focus. Video is dark
t13	15	11	0	1	eating	Out of focus. Video is dark
t13	15	12	0	1	eating	Out of focus. Video is dark
t13	15	13	0	1	eating	Out of focus. Video is dark
t13	15	14	0	1	eating	Out of focus. Video is dark
t13	15	15	0	1	eating	Out of focus. Video is dark
t13	15	16	0	1	eating	Out of focus. Video is dark
t13	15	17	0	1	eating	Out of focus. Video is dark
t13	15	18	0	1	eating	Out of focus. Video is dark
t13	16	0	0	0		Out of focus. Video is dark
t13	16	1	0	0		Out of focus. Video is dark
t13	16	2	0	0		Out of focus. Video is dark
t13	16	3	0	0		Out of focus. Video is dark
t13	16	4	1	0		Out of focus. Video is dark
t13	16	5	1	0		Out of focus. Video is dark
t13	16	6	1	0		Out of focus. Video is dark
t13	16	7	1	0		Out of focus. Video is dark
t13	16	8	0	1		Out of focus. Video is dark
t13	16	9	0	1		Out of focus. Video is dark
t13	16	10	0	1	eating	Out of focus. Video is dark
t13	16	11	0	1	eating	Out of focus. Video is dark
t13	16	12	0	1	eating	Out of focus. Video is dark
t13	16	13	0	1	eating	Out of focus. Video is dark
t13	16	14	0	1	eating	Out of focus. Video is dark
t13	16	15	0	1	eating	Out of focus. Video is dark
t13	16	16	0	1	eating	Out of focus. Video is dark
t13	16	17	0	1	eating	Out of focus. Video is dark
t13	16	18	0	1	eating	Out of focus. Video is dark

## Sheet: Fish_14
Animal ID (WT)	Video #	Second #	Animal Moving Upward? (any displacement toward the light's direction, inferred from the position the next second) (1 = yes; 0 = no)	Animal at Surface? (1 = yes; 0 = no)	Behavior Notes	Video Quality Notes	Other notes
t14	0	0	0	0	at the bottom of the tank	out of focus. Video very dark
t14	0	1	0	0	at the bottom of the tank	out of focus. Video very dark
t14	0	2	0	0	at the bottom of the tank	out of focus. Video very dark
t14	0	3	0	0	at the bottom of the tank	out of focus. Video very dark
t14	0	4	0	0	at the bottom of the tank	out of focus. Video very dark
t14	0	5	0	0	at the bottom of the tank	out of focus. Video very dark
t14	0	6	0	0	at the bottom of the tank	out of focus. Video very dark
t14	0	7	0	0	at the bottom of the tank	out of focus. Video very dark
t14	0	8	0	0	at the bottom of the tank	out of focus. Video very dark
t14	0	9	0	0	at the bottom of the tank	out of focus. Video very dark
t14	0	10	0	0	at the bottom of the tank	out of focus. Video very dark
t14	0	11	0	0	at the bottom of the tank	out of focus. Video very dark
t14	0	12	0	0	at the bottom of the tank	out of focus. Video very dark
t14	0	13	0	0	at the bottom of the tank	out of focus. Video very dark
t14	0	14	0	0	at the bottom of the tank	out of focus. Video very dark
t14	0	15	0	0	at the bottom of the tank	out of focus. Video very dark
t14	0	16	0	0	at the bottom of the tank	out of focus. Video very dark
t14	0	17	0	0	at the bottom of the tank	out of focus. Video very dark
t14	0	18	0	0	at the bottom of the tank	out of focus. Video very dark
t14	1	0	0	0		out of focus. Video very dark
t14	1	1	1	0		out of focus. Video very dark
t14	1	2	0	0		out of focus. Video very dark
t14	1	3	1	0		out of focus. Video very dark
t14	1	4	1	0		out of focus. Video very dark
t14	1	5	1	0		out of focus. Video very dark
t14	1	6	1	0		out of focus. Video very dark
t14	1	7	1	0		out of focus. Video very dark
t14	1	8	1	0		out of focus. Video very dark
t14	1	9	1	0		out of focus. Video very dark
t14	1	10	1	0		out of focus. Video very dark
t14	1	11	1	0		out of focus. Video very dark
t14	1	12	0	1	eating	out of focus. Video very dark
t14	1	13	0	1	eating	out of focus. Video very dark
t14	1	14	0	1	eating	out of focus. Video very dark
t14	1	15	0	1	eating	out of focus. Video very dark
t14	1	16	0	1	eating	out of focus. Video very dark
t14	1	17	0	1	eating	out of focus. Video very dark
t14	1	18	0	1	eating	out of focus. Video very dark
t14	2	0	0	0		out of focus. Video very dark
t14	2	1	0	0		out of focus. Video very dark
t14	2	2	0	0		out of focus. Video very dark
t14	2	3	0	0		out of focus. Video very dark
t14	2	4	1	0		out of focus. Video very dark
t14	2	5	1	0		out of focus. Video very dark
t14	2	6	1	0		out of focus. Video very dark
t14	2	7	1	0		out of focus. Video very dark
t14	2	8	1	0		out of focus. Video very dark
t14	2	9	0	1	eating	out of focus. Video very dark
t14	2	10	0	1	eating	out of focus. Video very dark
t14	2	11	0	1	eating	out of focus. Video very dark
t14	2	12	0	1	eating	out of focus. Video very dark
t14	2	13	0	1	eating	out of focus. Video very dark
t14	2	14	0	1	eating	out of focus. Video very dark
t14	2	15	0	1	eating	out of focus. Video very dark
t14	2	16	0	1	eating	out of focus. Video very dark
t14	2	17	0	1	eating	out of focus. Video very dark
t14	2	18	0	1	eating	out of focus. Video very dark
t14	3	0	1	0		out of focus. Video very dark
t14	3	1	1	0		out of focus. Video very dark
t14	3	2	0	0		out of focus. Video very dark
t14	3	3	0	0		out of focus. Video very dark
t14	3	4	1	0		out of focus. Video very dark
t14	3	5	0	1		out of focus. Video very dark
t14	3	6	0	1	eating	out of focus. Video very dark
t14	3	7	0	1	eating	out of focus. Video very dark
t14	3	8	0	1	eating	out of focus. Video very dark
t14	3	9	0	1	eating	out of focus. Video very dark
t14	3	10	0	1	eating	out of focus. Video very dark
t14	3	11	0	1	eating	out of focus. Video very dark
t14	3	12	0	1	eating	out of focus. Video very dark
t14	3	13	0	1	eating	out of focus. Video very dark
t14	3	14	0	1	eating	out of focus. Video very dark
t14	3	15	0	1	eating	out of focus. Video very dark
t14	3	16	0	1	eating	out of focus. Video very dark
t14	3	17	0	1	eating	out of focus. Video very dark
t14	3	18	0	1	eating	out of focus. Video very dark
t14	4	0	1	0		out of focus. Video very dark
t14	4	1	1	0		out of focus. Video very dark
t14	4	2	1	0		out of focus. Video very dark
t14	4	3	0	1		out of focus. Video very dark
t14	4	4	0	1		out of focus. Video very dark
t14	4	5	0	1		out of focus. Video very dark
t14	4	6	0	1		out of focus. Video very dark
t14	4	7	0	1	eating	out of focus. Video very dark
t14	4	8	0	1	eating	out of focus. Video very dark
t14	4	9	0	1	eating	out of focus. Video very dark
t14	4	10	0	1	eating	out of focus. Video very dark
t14	4	11	0	1	eating	out of focus. Video very dark
t14	4	12	0	1	eating	out of focus. Video very dark
t14	4	13	0	1	eating	out of focus. Video very dark
t14	4	14	0	1	eating	out of focus. Video very dark
t14	4	15	0	1	eating	out of focus. Video very dark
t14	4	16	0	1	eating	out of focus. Video very dark
t14	4	17	0	1	eating	out of focus. Video very dark
t14	4	18	0	1	eating	out of focus. Video very dark
t14	5	0	0	0	within 3 cm from surface	out of focus. Video very dark
t14	5	1	0	0	within 3 cm from surface	out of focus. Video very dark
t14	5	2	0	0	within 3 cm from surface	out of focus. Video very dark
t14	5	3	0	0	within 3 cm from surface	out of focus. Video very dark
t14	5	4	0	0	within 3 cm from surface	out of focus. Video very dark
t14	5	5	0	0	within 3 cm from surface	out of focus. Video very dark
t14	5	6	0	0	within 3 cm from surface	out of focus. Video very dark
t14	5	7	0	0		out of focus. Video very dark
t14	5	8	1	0		out of focus. Video very dark
t14	5	9	0	1	face the back of the tank	out of focus. Video very dark
t14	5	10	0	1	face the back of the tank	out of focus. Video very dark
t14	5	11	0	1	face the back of the tank	out of focus. Video very dark
t14	5	12	0	1	face the back of the tank	out of focus. Video very dark
t14	5	13	0	1	face the back of the tank	out of focus. Video very dark
t14	5	14	0	0		out of focus. Video very dark
t14	5	15	0	0		out of focus. Video very dark
t14	5	16	0	0		out of focus. Video very dark
t14	5	17	0	0		out of focus. Video very dark
t14	5	18	0	0		out of focus. Video very dark
t14	6	0	0	1	at surface	video = very dark?
t14	6	1	0	1	at surface	video = very dark?
t14	6	2	0	1	at surface	video = very dark?
t14	6	3	0	1	at surface	video = very dark?
t14	6	4	0	1	at surface	video = very dark?
t14	6	5	0	0		video = very dark?
t14	6	6	0	0		video = very dark?
t14	6	7	0	0		video = very dark?
t14	6	8	0	0		video = very dark?
t14	6	9	0	0		video = very dark?
t14	6	10	0	0		video = very dark?
t14	6	11	0	0		video = very dark?
t14	6	12	0	0		video = very dark?
t14	6	13	0	0		video = very dark?
t14	6	14	0	0		video = very dark?
t14	6	15	0	0		video = very dark?
t14	6	16	0	0		video = very dark?
t14	6	17	0	0		video = very dark?
t14	6	18	0	0		video = very dark?
t14	7	0	0	0
t14	7	1	0	0
t14	7	2	0	0	got scared; frantic movement
t14	7	3	0	0	at the bottom of the tank
t14	7	4	0	0	at the bottom of the tank
t14	7	5	0	0	at the bottom of the tank
t14	7	6	0	0	at the bottom of the tank
t14	7	7	0	0	at the bottom of the tank
t14	7	8	0	0	at the bottom of the tank
t14	7	9	0	0	at the bottom of the tank
t14	7	10	0	0	at the bottom of the tank
t14	7	11	0	0	at the bottom of the tank
t14	7	12	0	0	at the bottom of the tank
t14	7	13	0	0	at the bottom of the tank
t14	7	14	0	0	at the bottom of the tank
t14	7	15	0	0	at the bottom of the tank
t14	7	16	0	0	at the bottom of the tank
t14	7	17	0	0	at the bottom of the tank
t14	7	18	0	0	at the bottom of the tank
t14	8	0	0	1	at surface
t14	8	1	0	1	at surface
t14	8	2	0	1	at surface
t14	8	3	0	1	at surface
t14	8	4	0	1	at surface
t14	8	5	0	1	at surface
t14	8	6	0	1	at surface
t14	8	7	0	1	eating
t14	8	8	0	1	eating
t14	8	9	0	1	eating
t14	8	10	0	1	eating
t14	8	11	0	1	eating
t14	8	12	0	1	eating
t14	8	13	0	1	eating
t14	8	14	0	1	eating
t14	8	15	0	1	eating
t14	8	16	0	1	eating
t14	8	17	0	1	eating
t14	8	18	0	1	eating
t14	9	0	0	1	at surface
t14	9	1	0	1	at surface
t14	9	2	0	1	at surface
t14	9	3	0	1	at surface
t14	9	4	0	1	at surface
t14	9	5	0	1	at surface
t14	9	6	0	1	at surface
t14	9	7	0	1	eating
t14	9	8	0	1	eating
t14	9	9	0	1	eating
t14	9	10	0	1	eating
t14	9	11	0	1	eating
t14	9	12	0	1	eating
t14	9	13	0	1	eating
t14	9	14	0	1	eating
t14	9	15	0	1	eating
t14	9	16	0	1	eating
t14	9	17	0	1	eating
t14	9	18	0	1	eating
t14	10	0	0	0
t14	10	1	0	0
t14	10	2	1	0
t14	10	3	1	0
t14	10	4	1	0
t14	10	5	0	1
t14	10	6	0	1
t14	10	7	0	1
t14	10	8	0	1	eating
t14	10	9	0	1	eating
t14	10	10	0	1	eating
t14	10	11	0	1	eating
t14	10	12	0	1	eating
t14	10	13	0	1	eating
t14	10	14	0	1	eating
t14	10	15	0	1	eating
t14	10	16	0	1	eating
t14	10	17	0	1	eating
t14	10	18	0	1	eating
t14	11	0	0	1	at surface
t14	11	1	0	1	at surface
t14	11	2	0	1	at surface
t14	11	3	0	1	at surface
t14	11	4	0	1	at surface
t14	11	5	0	1	at surface
t14	11	6	0	1	at surface
t14	11	7	0	1	eating
t14	11	8	0	1	eating
t14	11	9	0	1	eating
t14	11	10	0	1	eating
t14	11	11	0	1	eating
t14	11	12	0	1	eating
t14	11	13	0	1	eating
t14	11	14	0	1	eating
t14	11	15	0	1	eating
t14	11	16	0	1	eating
t14	11	17	0	1	eating
t14	11	18	0	1	eating
t14	12	0	0	0
t14	12	1	0	0
t14	12	2	0	0
t14	12	3	1	0
t14	12	4	1	0
t14	12	5	1	0
t14	12	6	0	1
t14	12	7	0	1
t14	12	8	0	1
t14	12	9	0	1	eating
t14	12	10	0	1	eating
t14	12	11	0	1	eating
t14	12	12	0	1	eating
t14	12	13	0	1	eating
t14	12	14	0	1	eating
t14	12	15	0	1	eating
t14	12	16	0	1	eating
t14	12	17	0	1	eating
t14	12	18	0	1	eating
t14	13	0	0	1	at surface	video = very dark?
t14	13	1	0	1	at surface	video = very dark?
t14	13	2	0	0		video = very dark?
t14	13	3	0	0		video = very dark?
t14	13	4	0	0		video = very dark?
t14	13	5	0	0		video = very dark?
t14	13	6	0	0		video = very dark?
t14	13	7	0	0		video = very dark?
t14	13	8	0	0		video = very dark?
t14	13	9	1	0		video = very dark?
t14	13	10	1	0		video = very dark?
t14	13	11	0	1	eating	video = very dark?
t14	13	12	0	1	eating	video = very dark?
t14	13	13	0	1	eating	video = very dark?
t14	13	14	0	1	eating	video = very dark?
t14	13	15	0	1	eating	video = very dark?
t14	13	16	0	1		video = very dark?
t14	13	17	0	0		video = very dark?
t14	13	18	0	0		video = very dark?
t14	14	0	0	0	at the bottom of the tank
t14	14	1	0	0	at the bottom of the tank
t14	14	2	0	0	at the bottom of the tank
t14	14	3	0	0	at the bottom of the tank
t14	14	4	0	0	at the bottom of the tank
t14	14	5	0	0	at the bottom of the tank
t14	14	6	0	0	at the bottom of the tank
t14	14	7	0	0	at the bottom of the tank
t14	14	8	0	0	at the bottom of the tank
t14	14	9	0	0	at the bottom of the tank
t14	14	10	0	0	at the bottom of the tank
t14	14	11	0	0	at the bottom of the tank
t14	14	12	0	0	at the bottom of the tank
t14	14	13	0	0	at the bottom of the tank
t14	14	14	0	0	at the bottom of the tank
t14	14	15	0	0	at the bottom of the tank
t14	14	16	0	0	at the bottom of the tank
t14	14	17	0	0	at the bottom of the tank
t14	14	18	0	0	at the bottom of the tank
t14	15	0	0	0
t14	15	1	0	0
t14	15	2	1	0
t14	15	3	1	0
t14	15	4	1	0
t14	15	5	0	1
t14	15	6	0	1
t14	15	7	0	1
t14	15	8	0	1
t14	15	9	0	1	eating
t14	15	10	0	1	eating
t14	15	11	0	1	eating
t14	15	12	0	1	eating
t14	15	13	0	1	eating
t14	15	14	0	1	eating
t14	15	15	0	1	eating
t14	15	16	0	1	eating
t14	15	17	0	1	eating
t14	15	18	0	1	eating
t14	16	0	1	0
t14	16	1	1	0
t14	16	2	1	0
t14	16	3	0	1
t14	16	4	0	1
t14	16	5	0	1
t14	16	6	0	1	eating
t14	16	7	0	1	eating
t14	16	8	0	1	eating
t14	16	9	0	1	eating
t14	16	10	0	1	eating
t14	16	11	0	1	eating
t14	16	12	0	1	eating
t14	16	13	0	1	eating
t14	16	14	0	1	eating
t14	16	15	0	1	eating
t14	16	16	0	1	eating
t14	16	17	0	1	eating
t14	16	18	0	1	eating
t14	17	0	0	0
t14	17	1	0	0
t14	17	2	1	0
t14	17	3	1	0
t14	17	4	0	1
t14	17	5	0	1
t14	17	6	0	1
t14	17	7	0	1	eating
t14	17	8	0	1	eating
t14	17	9	0	1	eating
t14	17	10	0	1	eating
t14	17	11	0	1	eating
t14	17	12	0	1	eating
t14	17	13	0	1	eating
t14	17	14	0	1	eating
t14	17	15	0	1	eating
t14	17	16	0	1	eating
t14	17	17	0	1	eating
t14	17	18	0	1	eating

## Sheet: Fish_12
Animal ID (WT)	Video #	Second #	Animal Moving Upward? (any displacement toward the light's direction, inferred from the position the next second) (1 = yes; 0 = no)	Animal at Surface? (1 = yes; 0 = no)	Behavior Notes	Video Quality Notes	Other notes
t12	0	0	0	0	At the bottom of the tank	Out of focus	can't validate food drop
t12	0	1	0	0	At the bottom of the tank	Out of focus	can't validate food drop
t12	0	2	0	0	At the bottom of the tank	Out of focus	can't validate food drop
t12	0	3	0	0	At the bottom of the tank	Out of focus	can't validate food drop
t12	0	4	0	0	At the bottom of the tank	Out of focus	can't validate food drop
t12	0	5	0	0	At the bottom of the tank	Out of focus	can't validate food drop
t12	0	6	0	0	At the bottom of the tank	Out of focus	can't validate food drop
t12	0	7	0	0	No food drop. At the bottom of the tank	Out of focus	can't validate food drop
t12	0	8	0	0	At the bottom of the tank	Out of focus	can't validate food drop
t12	0	9	0	0	At the bottom of the tank	Out of focus	can't validate food drop
t12	0	10	0	0	At the bottom of the tank	Out of focus	can't validate food drop
t12	0	11	0	0	At the bottom of the tank	Out of focus	can't validate food drop
t12	0	12	0	0	At the bottom of the tank	Out of focus	can't validate food drop
t12	0	13	0	0	At the bottom of the tank	Out of focus	can't validate food drop
t12	0	14	0	0	At the bottom of the tank	Out of focus	can't validate food drop
t12	0	15	0	0	At the bottom of the tank	Out of focus	can't validate food drop
t12	0	16	0	0	At the bottom of the tank	Out of focus	can't validate food drop
t12	0	17	0	0	At the bottom of the tank	Out of focus	can't validate food drop
t12	0	18	0	0	At the bottom of the tank	Out of focus	can't validate food drop
t12	1	0	0	0		Out of focus	can't validate food drop
t12	1	1	1	0		Out of focus	can't validate food drop
t12	1	2	1	0		Out of focus	can't validate food drop
t12	1	3	1	0		Out of focus	can't validate food drop
t12	1	4	1	0		Out of focus	can't validate food drop
t12	1	5	0	0		Out of focus	can't validate food drop
t12	1	6	1	0		Out of focus	can't validate food drop
t12	1	7	1	0	No food drop	Out of focus	can't validate food drop
t12	1	8	1	0		Out of focus	can't validate food drop
t12	1	9	0	1		Out of focus	can't validate food drop
t12	1	10	0	0		Out of focus	can't validate food drop
t12	1	11	0	0		Out of focus	can't validate food drop
t12	1	12	1	0		Out of focus	can't validate food drop
t12	1	13	1	0		Out of focus	can't validate food drop
t12	1	14	0	1		Out of focus	can't validate food drop
t12	1	15	0	0		Out of focus	can't validate food drop
t12	1	16	0	0		Out of focus	can't validate food drop
t12	1	17	0	1		Out of focus	can't validate food drop
t12	1	18	0	0		Out of focus	can't validate food drop
t12	2	0	0	0	At the bottom quarter of the tank	Out of focus	can't validate food drop
t12	2	1	0	0	At the bottom quarter of the tank	Out of focus	can't validate food drop
t12	2	2	0	0	At the bottom quarter of the tank	Out of focus	can't validate food drop
t12	2	3	0	0	At the bottom quarter of the tank	Out of focus	can't validate food drop
t12	2	4	0	0	At the bottom quarter of the tank	Out of focus	can't validate food drop
t12	2	5	0	0	At the bottom quarter of the tank	Out of focus	can't validate food drop
t12	2	6	0	0	At the bottom quarter of the tank	Out of focus	can't validate food drop
t12	2	7	0	0	No food drop. At the bottom quarter of the tank	Out of focus	can't validate food drop
t12	2	8	0	0	At the bottom quarter of the tank	Out of focus	can't validate food drop
t12	2	9	0	0	At the bottom quarter of the tank	Out of focus	can't validate food drop
t12	2	10	0	0	At the bottom quarter of the tank	Out of focus	can't validate food drop
t12	2	11	0	0	At the bottom quarter of the tank	Out of focus	can't validate food drop
t12	2	12	0	0	At the bottom quarter of the tank	Out of focus	can't validate food drop
t12	2	13	0	0	At the bottom quarter of the tank	Out of focus	can't validate food drop
t12	2	14	0	0	At the bottom quarter of the tank	Out of focus	can't validate food drop
t12	2	15	0	0	At the bottom quarter of the tank	Out of focus	can't validate food drop
t12	2	16	0	0	At the bottom quarter of the tank	Out of focus	can't validate food drop
t12	2	17	0	0	At the bottom quarter of the tank	Out of focus	can't validate food drop
t12	2	18	0	0	At the bottom quarter of the tank	Out of focus	can't validate food drop
t12	3	0	0	0	At the bottom quarter of the tank	Out of focus	can't validate food drop
t12	3	1	0	0	At the bottom quarter of the tank	Out of focus	can't validate food drop
t12	3	2	0	0	At the bottom quarter of the tank	Out of focus	can't validate food drop
t12	3	3	0	0	At the bottom quarter of the tank	Out of focus	can't validate food drop
t12	3	4	0	0	At the bottom quarter of the tank	Out of focus	can't validate food drop
t12	3	5	0	0	At the bottom quarter of the tank	Out of focus	can't validate food drop
t12	3	6	0	0	At the bottom quarter of the tank	Out of focus	can't validate food drop
t12	3	7	0	0	No food drop. At the bottom quarter of the tank	Out of focus	can't validate food drop
t12	3	8	0	0	At the bottom quarter of the tank	Out of focus	can't validate food drop
t12	3	9	0	0	At the bottom quarter of the tank	Out of focus	can't validate food drop
t12	3	10	0	0	At the bottom quarter of the tank	Out of focus	can't validate food drop
t12	3	11	0	0	At the bottom quarter of the tank	Out of focus	can't validate food drop
t12	3	12	0	0	At the bottom quarter of the tank	Out of focus	can't validate food drop
t12	3	13	0	0	At the bottom quarter of the tank	Out of focus	can't validate food drop
t12	3	14	0	0	At the bottom quarter of the tank	Out of focus	can't validate food drop
t12	3	15	0	0	At the bottom quarter of the tank	Out of focus	can't validate food drop
t12	3	16	0	0	At the bottom quarter of the tank	Out of focus	can't validate food drop
t12	3	17	1	0	At the bottom quarter of the tank	Out of focus	can't validate food drop
t12	3	18	0	0	At the bottom quarter of the tank	Out of focus	can't validate food drop
t12	4	0	0	0	At the bottom of the tank	Out of focus	can't validate food drop
t12	4	1	0	0	At the bottom of the tank	Out of focus	can't validate food drop
t12	4	2	0	0	At the bottom of the tank	Out of focus	can't validate food drop
t12	4	3	0	0	At the bottom of the tank	Out of focus	can't validate food drop
t12	4	4	0	0	At the bottom of the tank	Out of focus	can't validate food drop
t12	4	5	0	0	At the bottom of the tank	Out of focus	can't validate food drop
t12	4	6	0	0	At the bottom of the tank	Out of focus	can't validate food drop
t12	4	7	0	0	No food drop. At the bottom of the tank	Out of focus	can't validate food drop
t12	4	8	0	0	At the bottom of the tank	Out of focus	can't validate food drop
t12	4	9	0	0	At the bottom of the tank	Out of focus	can't validate food drop
t12	4	10	0	0	At the bottom of the tank	Out of focus	can't validate food drop
t12	4	11	0	0	At the bottom of the tank	Out of focus	can't validate food drop
t12	4	12	0	0	At the bottom of the tank	Out of focus	can't validate food drop
t12	4	13	0	0	At the bottom of the tank	Out of focus	can't validate food drop
t12	4	14	0	0	At the bottom of the tank	Out of focus	can't validate food drop
t12	4	15	0	0	At the bottom of the tank	Out of focus	can't validate food drop
t12	4	16	0	0	At the bottom of the tank	Out of focus	can't validate food drop
t12	4	17	0	0	At the bottom of the tank	Out of focus	can't validate food drop
t12	4	18	0	0	At the bottom of the tank	Out of focus	can't validate food drop
t12	5	0	0	0	At the center of the tank. Not moving much	Out of focus	can't validate food drop
t12	5	1	0	0	At the center of the tank. Not moving much	Out of focus	can't validate food drop
t12	5	2	0	0	At the center of the tank. Not moving much	Out of focus	can't validate food drop
t12	5	3	0	0	At the center of the tank. Not moving much	Out of focus	can't validate food drop
t12	5	4	0	0	At the center of the tank. Not moving much	Out of focus	can't validate food drop
t12	5	5	0	0	At the center of the tank. Not moving much	Out of focus	can't validate food drop
t12	5	6	0	0	At the center of the tank. Not moving much	Out of focus	can't validate food drop
t12	5	7	0	0	No food drop. At the center of the tank. Not moving much	Out of focus	can't validate food drop
t12	5	8	0	0	At the center of the tank. Not moving much	Out of focus	can't validate food drop
t12	5	9	0	0	At the center of the tank. Not moving much	Out of focus	can't validate food drop
t12	5	10	0	0	At the center of the tank. Not moving much	Out of focus	can't validate food drop
t12	5	11	0	0	At the center of the tank. Not moving much	Out of focus	can't validate food drop
t12	5	12	0	0	At the center of the tank. Not moving much	Out of focus	can't validate food drop
t12	5	13	0	0	At the center of the tank. Not moving much	Out of focus	can't validate food drop
t12	5	14	0	0	At the center of the tank. Not moving much	Out of focus	can't validate food drop
t12	5	15	0	0	At the center of the tank. Not moving much	Out of focus	can't validate food drop
t12	5	16	0	0	At the center of the tank. Not moving much	Out of focus	can't validate food drop
t12	5	17	0	0	At the center of the tank. Not moving much	Out of focus	can't validate food drop
t12	5	18	0	0	At the center of the tank. Not moving much	Out of focus	can't validate food drop
t12	6	0	0	0		Out of focus	can't validate food drop
t12	6	1	0	0		Out of focus	can't validate food drop
t12	6	2	0	0		Out of focus	can't validate food drop
t12	6	3	0	0		Out of focus	can't validate food drop
t12	6	4	0	0		Out of focus	can't validate food drop
t12	6	5	0	0		Out of focus	can't validate food drop
t12	6	6	0	0		Out of focus	can't validate food drop
t12	6	7	1	0	No food drop	Out of focus	can't validate food drop
t12	6	8	1	0		Out of focus	can't validate food drop
t12	6	9	1	0		Out of focus	can't validate food drop
t12	6	10	0	0		Out of focus	can't validate food drop
t12	6	11	1	0		Out of focus	can't validate food drop
t12	6	12	1	0		Out of focus	can't validate food drop
t12	6	13	1	0		Out of focus	can't validate food drop
t12	6	14	0	0		Out of focus	can't validate food drop
t12	6	15	1	0		Out of focus	can't validate food drop
t12	6	16	1	0		Out of focus	can't validate food drop
t12	6	17	1	0		Out of focus	can't validate food drop
t12	6	18	1	0	reaches the surface eventually	Out of focus	can't validate food drop
t12	7	0	0	0	At the bottom of the tank	Out of focus	can't validate food drop
t12	7	1	0	0	At the bottom of the tank	Out of focus	can't validate food drop
t12	7	2	0	0	At the bottom of the tank	Out of focus	can't validate food drop
t12	7	3	0	0	At the bottom of the tank	Out of focus	can't validate food drop
t12	7	4	0	0	At the bottom of the tank	Out of focus	can't validate food drop
t12	7	5	0	0	At the bottom of the tank	Out of focus	can't validate food drop
t12	7	6	0	0	At the bottom of the tank	Out of focus	can't validate food drop
t12	7	7	0	0	No food drop. At the bottom of the tank	Out of focus	can't validate food drop
t12	7	8	0	0	At the bottom of the tank	Out of focus	can't validate food drop
t12	7	9	0	0	At the bottom of the tank	Out of focus	can't validate food drop
t12	7	10	0	0	At the bottom of the tank	Out of focus	can't validate food drop
t12	7	11	0	0	At the bottom of the tank	Out of focus	can't validate food drop
t12	7	12	0	0	At the bottom of the tank	Out of focus	can't validate food drop
t12	7	13	0	0	At the bottom of the tank	Out of focus	can't validate food drop
t12	7	14	0	0	At the bottom of the tank	Out of focus	can't validate food drop
t12	7	15	0	0	At the bottom of the tank	Out of focus	can't validate food drop
t12	7	16	0	0	At the bottom of the tank	Out of focus	can't validate food drop
t12	7	17	0	0	At the bottom of the tank	Out of focus	can't validate food drop
t12	7	18	0	0	At the bottom of the tank	Out of focus	can't validate food drop
t12	8	0	0	0		Out of focus	can't validate food drop
t12	8	1	0	0		Out of focus	can't validate food drop
t12	8	2	0	0		Out of focus	can't validate food drop
t12	8	3	1	0		Out of focus	can't validate food drop
t12	8	4	1	0		Out of focus	can't validate food drop
t12	8	5	1	0		Out of focus	can't validate food drop
t12	8	6	0	0		Out of focus	can't validate food drop
t12	8	7	0	0	No food drop	Out of focus	can't validate food drop
t12	8	8	0	0		Out of focus	can't validate food drop
t12	8	9	0	0		Out of focus	can't validate food drop
t12	8	10	0	0		Out of focus	can't validate food drop
t12	8	11	0	0		Out of focus	can't validate food drop
t12	8	12	0	0		Out of focus	can't validate food drop
t12	8	13	0	0		Out of focus	can't validate food drop
t12	8	14	1	0		Out of focus	can't validate food drop
t12	8	15	1	0		Out of focus	can't validate food drop
t12	8	16	1	0		Out of focus	can't validate food drop
t12	8	17	0	0		Out of focus	can't validate food drop
t12	8	18	0	0		Out of focus	can't validate food drop
t12	9	0	0	0		Out of focus	can't validate food drop
t12	9	1	1	0		Out of focus	can't validate food drop
t12	9	2	1	0		Out of focus	can't validate food drop
t12	9	3	1	0		Out of focus	can't validate food drop
t12	9	4	1	0		Out of focus	can't validate food drop
t12	9	5	0	1		Out of focus	can't validate food drop
t12	9	6	0	1		Out of focus	can't validate food drop
t12	9	7	0	1	No food drop	Out of focus	can't validate food drop
t12	9	8	0	1		Out of focus	can't validate food drop
t12	9	9	0	1		Out of focus	can't validate food drop
t12	9	10	0	1		Out of focus	can't validate food drop
t12	9	11	0	1		Out of focus	can't validate food drop
t12	9	12	0	1		Out of focus	can't validate food drop
t12	9	13	0	1		Out of focus	can't validate food drop
t12	9	14	0	1		Out of focus	can't validate food drop
t12	9	15	0	0		Out of focus	can't validate food drop
t12	9	16	1	0		Out of focus	can't validate food drop
t12	9	17	1	0		Out of focus	can't validate food drop
t12	9	18	1	0	eventually reaches surface	Out of focus	can't validate food drop
t12	10	0	1	0		Out of focus	can't validate food drop
t12	10	1	1	0		Out of focus	can't validate food drop
t12	10	2	1	0		Out of focus	can't validate food drop
t12	10	3	1	0		Out of focus	can't validate food drop
t12	10	4	1	0		Out of focus	can't validate food drop
t12	10	5	1	0		Out of focus	can't validate food drop
t12	10	6	1	0		Out of focus	can't validate food drop
t12	10	7	0	1	No food drop	Out of focus	can't validate food drop
t12	10	8	0	0		Out of focus	can't validate food drop
t12	10	9	0	0		Out of focus	can't validate food drop
t12	10	10	0	0		Out of focus	can't validate food drop
t12	10	11	0	0		Out of focus	can't validate food drop
t12	10	12	0	0		Out of focus	can't validate food drop
t12	10	13	0	0		Out of focus	can't validate food drop
t12	10	14	0	0		Out of focus	can't validate food drop
t12	10	15	0	0		Out of focus	can't validate food drop
t12	10	16	0	0		Out of focus	can't validate food drop
t12	10	17	1	0		Out of focus	can't validate food drop
t12	10	18	1	0		Out of focus	can't validate food drop
t12	11	0	1	0		Out of focus	can't validate food drop
t12	11	1	1	0		Out of focus	can't validate food drop
t12	11	2	1	0		Out of focus	can't validate food drop
t12	11	3	0	1		Out of focus	can't validate food drop
t12	11	4	0	1		Out of focus	can't validate food drop
t12	11	5	0	1		Out of focus	can't validate food drop
t12	11	6	0	1		Out of focus	can't validate food drop
t12	11	7	0	0	No food drop	Out of focus	can't validate food drop
t12	11	8	0	0		Out of focus	can't validate food drop
t12	11	9	0	0		Out of focus	can't validate food drop
t12	11	10	0	0		Out of focus	can't validate food drop
t12	11	11	0	0		Out of focus	can't validate food drop
t12	11	12	0	0		Out of focus	can't validate food drop
t12	11	13	0	0		Out of focus	can't validate food drop
t12	11	14	0	0		Out of focus	can't validate food drop
t12	11	15	0	0		Out of focus	can't validate food drop
t12	11	16	0	0		Out of focus	can't validate food drop
t12	11	17	1	0		Out of focus	can't validate food drop
t12	11	18	0	0		Out of focus	can't validate food drop
t12	12	0	0	0		Out of focus	can't validate food drop
t12	12	1	0	0		Out of focus	can't validate food drop
t12	12	2	1	0		Out of focus	can't validate food drop
t12	12	3	0	0		Out of focus	can't validate food drop
t12	12	4	0	0		Out of focus	can't validate food drop
t12	12	5	0	0		Out of focus	can't validate food drop
t12	12	6	0	0		Out of focus	can't validate food drop
t12	12	7	0	0	No food drop	Out of focus	can't validate food drop
t12	12	8	0	0		Out of focus	can't validate food drop
t12	12	9	0	0		Out of focus	can't validate food drop
t12	12	10	1	0		Out of focus	can't validate food drop
t12	12	11	0	0		Out of focus	can't validate food drop
t12	12	12	0	0		Out of focus	can't validate food drop
t12	12	13	0	0		Out of focus	can't validate food drop
t12	12	14	1	0		Out of focus	can't validate food drop
t12	12	15	0	0		Out of focus	can't validate food drop
t12	12	16	0	0		Out of focus	can't validate food drop
t12	12	17	0	0		Out of focus	can't validate food drop
t12	12	18	0	0		Out of focus	can't validate food drop
t12	13	0	0	0		Out of focus	can't validate food drop
t12	13	1	0	0		Out of focus	can't validate food drop
t12	13	2	0	0		Out of focus	can't validate food drop
t12	13	3	1	0		Out of focus	can't validate food drop
t12	13	4	1	0		Out of focus	can't validate food drop
t12	13	5	1	0		Out of focus	can't validate food drop
t12	13	6	1	0		Out of focus	can't validate food drop
t12	13	7	1	0	No food drop	Out of focus	can't validate food drop
t12	13	8	1	0		Out of focus	can't validate food drop
t12	13	9	0	0		Out of focus	can't validate food drop
t12	13	10	1	0		Out of focus	can't validate food drop
t12	13	11	1	0		Out of focus	can't validate food drop
t12	13	12	0	0		Out of focus	can't validate food drop
t12	13	13	0	0		Out of focus	can't validate food drop
t12	13	14	0	0		Out of focus	can't validate food drop
t12	13	15	0	0		Out of focus	can't validate food drop
t12	13	16	0	0		Out of focus	can't validate food drop
t12	13	17	0	0		Out of focus	can't validate food drop
t12	13	18	0	0		Out of focus	can't validate food drop
t12	14	0	0	0	At the bottom of the tank	Out of focus	can't validate food drop
t12	14	1	0	0	At the bottom of the tank	Out of focus	can't validate food drop
t12	14	2	0	0	At the bottom of the tank	Out of focus	can't validate food drop
t12	14	3	0	0	At the bottom of the tank	Out of focus	can't validate food drop
t12	14	4	0	0	At the bottom of the tank	Out of focus	can't validate food drop
t12	14	5	0	0	At the bottom of the tank	Out of focus	can't validate food drop
t12	14	6	0	0	At the bottom of the tank	Out of focus	can't validate food drop
t12	14	7	0	0	No food drop. At the bottom of the tank	Out of focus	can't validate food drop
t12	14	8	0	0	At the bottom of the tank	Out of focus	can't validate food drop
t12	14	9	0	0	At the bottom of the tank	Out of focus	can't validate food drop
t12	14	10	0	0	At the bottom of the tank	Out of focus	can't validate food drop
t12	14	11	0	0	At the bottom of the tank	Out of focus	can't validate food drop
t12	14	12	0	0	At the bottom of the tank	Out of focus	can't validate food drop
t12	14	13	0	0	At the bottom of the tank	Out of focus	can't validate food drop
t12	14	14	0	0	At the bottom of the tank	Out of focus	can't validate food drop
t12	14	15	0	0	At the bottom of the tank	Out of focus	can't validate food drop
t12	14	16	0	0	At the bottom of the tank	Out of focus	can't validate food drop
t12	14	17	0	0	At the bottom of the tank	Out of focus	can't validate food drop
t12	14	18	0	0	At the bottom of the tank	Out of focus	can't validate food drop
t12	15	0	0	0		Out of focus	can't validate food drop
t12	15	1	1	0		Out of focus	can't validate food drop
t12	15	2	1	0		Out of focus	can't validate food drop
t12	15	3	0	0		Out of focus	can't validate food drop
t12	15	4	1	0		Out of focus	can't validate food drop
t12	15	5	1	0		Out of focus	can't validate food drop
t12	15	6	1	0		Out of focus	can't validate food drop
t12	15	7	0	1	No food drop	Out of focus	can't validate food drop
t12	15	8	0	0		Out of focus	can't validate food drop
t12	15	9	0	0		Out of focus	can't validate food drop
t12	15	10	0	0		Out of focus	can't validate food drop
t12	15	11	0	0		Out of focus	can't validate food drop
t12	15	12	0	0		Out of focus	can't validate food drop
t12	15	13	0	0		Out of focus	can't validate food drop
t12	15	14	1	0		Out of focus	can't validate food drop
t12	15	15	1	0		Out of focus	can't validate food drop
t12	15	16	0	1		Out of focus	can't validate food drop
t12	15	17	0	1		Out of focus	can't validate food drop
t12	15	18	0	1		Out of focus	can't validate food drop
t12	16	0	0	0		Out of focus	can't validate food drop
t12	16	1	0	0		Out of focus	can't validate food drop
t12	16	2	1	0		Out of focus	can't validate food drop
t12	16	3	0	0		Out of focus	can't validate food drop
t12	16	4	0	0		Out of focus	can't validate food drop
t12	16	5	0	0		Out of focus	can't validate food drop
t12	16	6	1	0		Out of focus	can't validate food drop
t12	16	7	1	0	No food drop	Out of focus	can't validate food drop
t12	16	8	0	0		Out of focus	can't validate food drop
t12	16	9	0	0		Out of focus	can't validate food drop
t12	16	10	0	0		Out of focus	can't validate food drop
t12	16	11	0	0		Out of focus	can't validate food drop
t12	16	12	0	0		Out of focus	can't validate food drop
t12	16	13	0	0		Out of focus	can't validate food drop
t12	16	14	1	0		Out of focus	can't validate food drop
t12	16	15	1	0		Out of focus	can't validate food drop
t12	16	16	0	0		Out of focus	can't validate food drop
t12	16	17	0	0		Out of focus	can't validate food drop
t12	16	18	0	0		Out of focus	can't validate food drop
t12	17	0	0	0	within 1 cm from surface	Out of focus	can't validate food drop
t12	17	1	1	0	within 1 cm from surface	Out of focus	can't validate food drop
t12	17	2	0	1		Out of focus	can't validate food drop
t12	17	3	0	1		Out of focus	can't validate food drop
t12	17	4	0	1		Out of focus	can't validate food drop
t12	17	5	0	0		Out of focus	can't validate food drop
t12	17	6	0	0		Out of focus	can't validate food drop
t12	17	7	0	0	No food drop	Out of focus	can't validate food drop
t12	17	8	0	0		Out of focus	can't validate food drop
t12	17	9	0	0		Out of focus	can't validate food drop
t12	17	10	1	0		Out of focus	can't validate food drop
t12	17	11	1	0		Out of focus	can't validate food drop
t12	17	12	1	0		Out of focus	can't validate food drop
t12	17	13	1	0		Out of focus	can't validate food drop
t12	17	14	0	0		Out of focus	can't validate food drop
t12	17	15	1	0		Out of focus	can't validate food drop
t12	17	16	0	1		Out of focus	can't validate food drop
t12	17	17	0	1		Out of focus	can't validate food drop
t12	17	18	0	1		Out of focus	can't validate food drop
t12	18	0	0	0		Out of focus	can't validate food drop
t12	18	1	0	0		Out of focus	can't validate food drop
t12	18	2	0	0		Out of focus	can't validate food drop
t12	18	3	0	0		Out of focus	can't validate food drop
t12	18	4	0	0		Out of focus	can't validate food drop
t12	18	5	0	0		Out of focus	can't validate food drop
t12	18	6	0	0		Out of focus	can't validate food drop
t12	18	7	1	0	No food drop	Out of focus	can't validate food drop
t12	18	8	0	0		Out of focus	can't validate food drop
t12	18	9	0	0		Out of focus	can't validate food drop
t12	18	10	1	0		Out of focus	can't validate food drop
t12	18	11	1	0		Out of focus	can't validate food drop
t12	18	12	1	0		Out of focus	can't validate food drop
t12	18	13	1	0		Out of focus	can't validate food drop
t12	18	14	1	0		Out of focus	can't validate food drop
t12	18	15	1	0		Out of focus	can't validate food drop
t12	18	16	0	1		Out of focus	can't validate food drop
t12	18	17	0	1		Out of focus	can't validate food drop
t12	18	18	0	1		Out of focus	can't validate food drop
t12	19	0	0	0		Out of focus	can't validate food drop
t12	19	1	0	0		Out of focus	can't validate food drop
t12	19	2	0	0		Out of focus	can't validate food drop
t12	19	3	0	0		Out of focus	can't validate food drop
t12	19	4	0	0		Out of focus	can't validate food drop
t12	19	5	0	0		Out of focus	can't validate food drop
t12	19	6	0	0		Out of focus	can't validate food drop
t12	19	7	0	0	No food drop	Out of focus	can't validate food drop
t12	19	8	0	0		Out of focus	can't validate food drop
t12	19	9	0	0		Out of focus	can't validate food drop
t12	19	10	0	0		Out of focus	can't validate food drop
t12	19	11	0	0		Out of focus	can't validate food drop
t12	19	12	1	0		Out of focus	can't validate food drop
t12	19	13	1	0		Out of focus	can't validate food drop
t12	19	14	1	0		Out of focus	can't validate food drop
t12	19	15	1	0		Out of focus	can't validate food drop
t12	19	16	1	0		Out of focus	can't validate food drop
t12	19	17	1	0		Out of focus	can't validate food drop
t12	19	18	0	1		Out of focus	can't validate food drop
t12	20	0	0	0	At the bottom quarter of the tank	Out of focus	can't validate food drop
t12	20	1	0	0	At the bottom quarter of the tank	Out of focus	can't validate food drop
t12	20	2	0	0	At the bottom quarter of the tank	Out of focus	can't validate food drop
t12	20	3	0	0	At the bottom quarter of the tank	Out of focus	can't validate food drop
t12	20	4	0	0	At the bottom quarter of the tank	Out of focus	can't validate food drop
t12	20	5	0	0	At the bottom quarter of the tank	Out of focus	can't validate food drop
t12	20	6	0	0	At the bottom quarter of the tank	Out of focus	can't validate food drop
t12	20	7	0	0	No food drop. At the bottom quarter of the tank	Out of focus	can't validate food drop
t12	20	8	0	0	At the bottom quarter of the tank	Out of focus	can't validate food drop
t12	20	9	0	0	At the bottom quarter of the tank	Out of focus	can't validate food drop
t12	20	10	0	0	At the bottom quarter of the tank	Out of focus	can't validate food drop
t12	20	11	0	0	At the bottom quarter of the tank	Out of focus	can't validate food drop
t12	20	12	0	0	At the bottom quarter of the tank	Out of focus	can't validate food drop
t12	20	13	0	0	At the bottom quarter of the tank	Out of focus	can't validate food drop
t12	20	14	0	0	At the bottom quarter of the tank	Out of focus	can't validate food drop
t12	20	15	0	0	At the bottom quarter of the tank	Out of focus	can't validate food drop
t12	20	16	0	0	At the bottom quarter of the tank	Out of focus	can't validate food drop
t12	20	17	0	0	At the bottom quarter of the tank	Out of focus	can't validate food drop
t12	20	18	0	0	At the bottom quarter of the tank	Out of focus	can't validate food drop
t12	21	0	0	0	fish at the bottom of the tank, not moving	Out of focus	can't validate food drop
t12	21	1	0	0	fish at the bottom of the tank, not moving	Out of focus	can't validate food drop
t12	21	2	0	0	fish at the bottom of the tank, not moving	Out of focus	can't validate food drop
t12	21	3	0	0	fish at the bottom of the tank, not moving	Out of focus	can't validate food drop
t12	21	4	0	0	fish at the bottom of the tank, not moving	Out of focus	can't validate food drop
t12	21	5	0	0	fish at the bottom of the tank, not moving	Out of focus	can't validate food drop
t12	21	6	0	0	fish at the bottom of the tank, not moving	Out of focus	can't validate food drop
t12	21	7	0	0	No food drop. fish at the bottom of the tank, not moving	Out of focus	can't validate food drop
t12	21	8	0	0	fish at the bottom of the tank, not moving	Out of focus	can't validate food drop
t12	21	9	0	0	fish at the bottom of the tank, not moving	Out of focus	can't validate food drop
t12	21	10	0	0	fish at the bottom of the tank, not moving	Out of focus	can't validate food drop
t12	21	11	0	0	fish at the bottom of the tank, not moving	Out of focus	can't validate food drop
t12	21	12	0	0	fish at the bottom of the tank, not moving	Out of focus	can't validate food drop
t12	21	13	0	0	fish at the bottom of the tank, not moving	Out of focus	can't validate food drop
t12	21	14	0	0	fish at the bottom of the tank, not moving	Out of focus	can't validate food drop
t12	21	15	0	0	fish at the bottom of the tank, not moving	Out of focus	can't validate food drop
t12	21	16	0	0	fish at the bottom of the tank, not moving	Out of focus	can't validate food drop
t12	21	17	0	0	fish at the bottom of the tank, not moving	Out of focus	can't validate food drop
t12	21	18	0	0	fish at the bottom of the tank, not moving	Out of focus	can't validate food drop

## Sheet: Fish_17
Animal ID (WT)	Video #	Second #	Animal Moving Upward? (any displacement toward the light's direction, inferred from the position the next second) (1 = yes; 0 = no)	Animal at Surface? (1 = yes; 0 = no)	Behavior Notes	Video Quality Notes	Other notes
t17	0	0	0	0	fish at the bottom of the tank	out of focus. The front of the tank bottom is not visible
t17	0	1	0	0	fish at the bottom of the tank	out of focus. The front of the tank bottom is not visible
t17	0	2	0	0	fish at the bottom of the tank	out of focus. The front of the tank bottom is not visible
t17	0	3	0	0	fish at the bottom of the tank	out of focus. The front of the tank bottom is not visible
t17	0	4	0	0	fish at the bottom of the tank	out of focus. The front of the tank bottom is not visible
t17	0	5	0	0	fish at the bottom of the tank	out of focus. The front of the tank bottom is not visible
t17	0	6	0	0	fish at the bottom of the tank	out of focus. The front of the tank bottom is not visible
t17	0	7	0	0	fish at the bottom of the tank	out of focus. The front of the tank bottom is not visible
t17	0	8	0	0	fish at the bottom of the tank	out of focus. The front of the tank bottom is not visible
t17	0	9	0	0	fish at the bottom of the tank	out of focus. The front of the tank bottom is not visible
t17	0	10	0	0	fish at the bottom of the tank	out of focus. The front of the tank bottom is not visible
t17	0	11	0	0	fish at the bottom of the tank	out of focus. The front of the tank bottom is not visible
t17	0	12	0	0	fish at the bottom of the tank	out of focus. The front of the tank bottom is not visible
t17	0	13	0	0	fish at the bottom of the tank	out of focus. The front of the tank bottom is not visible
t17	0	14	0	0	fish at the bottom of the tank	out of focus. The front of the tank bottom is not visible
t17	0	15	0	0	fish at the bottom of the tank	out of focus. The front of the tank bottom is not visible
t17	0	16	0	0	fish at the bottom of the tank	out of focus. The front of the tank bottom is not visible
t17	0	17	0	0	fish at the bottom of the tank	out of focus. The front of the tank bottom is not visible
t17	0	18	0	0	fish at the bottom of the tank	out of focus. The front of the tank bottom is not visible
t17	1	0	0	0	fish at the bottom of the tank	out of focus. The front of the tank bottom is not visible
t17	1	1	0	0	fish at the bottom of the tank	out of focus. The front of the tank bottom is not visible
t17	1	2	0	0	fish at the bottom of the tank	out of focus. The front of the tank bottom is not visible
t17	1	3	0	0	fish at the bottom of the tank	out of focus. The front of the tank bottom is not visible
t17	1	4	0	0	fish at the bottom of the tank	out of focus. The front of the tank bottom is not visible
t17	1	5	0	0	fish at the bottom of the tank	out of focus. The front of the tank bottom is not visible
t17	1	6	0	0	fish at the bottom of the tank	out of focus. The front of the tank bottom is not visible
t17	1	7	0	0	fish at the bottom of the tank	out of focus. The front of the tank bottom is not visible
t17	1	8	0	0	fish at the bottom of the tank	out of focus. The front of the tank bottom is not visible
t17	1	9	0	0	fish at the bottom of the tank	out of focus. The front of the tank bottom is not visible
t17	1	10	0	0	fish at the bottom of the tank	out of focus. The front of the tank bottom is not visible
t17	1	11	0	0	fish at the bottom of the tank	out of focus. The front of the tank bottom is not visible
t17	1	12	0	0	fish at the bottom of the tank	out of focus. The front of the tank bottom is not visible
t17	1	13	0	0	fish at the bottom of the tank	out of focus. The front of the tank bottom is not visible
t17	1	14	0	0	fish at the bottom of the tank	out of focus. The front of the tank bottom is not visible
t17	1	15	0	0	fish at the bottom of the tank	out of focus. The front of the tank bottom is not visible
t17	1	16	0	0	fish at the bottom of the tank	out of focus. The front of the tank bottom is not visible
t17	1	17	0	0	fish at the bottom of the tank	out of focus. The front of the tank bottom is not visible
t17	1	18	0	0	fish at the bottom of the tank	out of focus. The front of the tank bottom is not visible
t17	2	0	0	0	fish at the bottom of the tank	out of focus. The front of the tank bottom is not visible
t17	2	1	0	0	fish at the bottom of the tank	out of focus. The front of the tank bottom is not visible
t17	2	2	0	0	fish at the bottom of the tank	out of focus. The front of the tank bottom is not visible
t17	2	3	0	0	fish at the bottom of the tank	out of focus. The front of the tank bottom is not visible
t17	2	4	0	0	fish at the bottom of the tank	out of focus. The front of the tank bottom is not visible
t17	2	5	0	0	fish at the bottom of the tank	out of focus. The front of the tank bottom is not visible
t17	2	6	0	0	fish at the bottom of the tank	out of focus. The front of the tank bottom is not visible
t17	2	7	0	0	fish at the bottom of the tank	out of focus. The front of the tank bottom is not visible
t17	2	8	0	0	fish at the bottom of the tank	out of focus. The front of the tank bottom is not visible
t17	2	9	0	0	fish at the bottom of the tank	out of focus. The front of the tank bottom is not visible
t17	2	10	0	0	fish at the bottom of the tank	out of focus. The front of the tank bottom is not visible
t17	2	11	0	0	fish at the bottom of the tank	out of focus. The front of the tank bottom is not visible
t17	2	12	0	0	fish at the bottom of the tank	out of focus. The front of the tank bottom is not visible
t17	2	13	0	0	fish at the bottom of the tank	out of focus. The front of the tank bottom is not visible
t17	2	14	0	0	fish at the bottom of the tank	out of focus. The front of the tank bottom is not visible
t17	2	15	0	0	fish at the bottom of the tank	out of focus. The front of the tank bottom is not visible
t17	2	16	0	0	fish at the bottom of the tank	out of focus. The front of the tank bottom is not visible
t17	2	17	0	0	fish at the bottom of the tank	out of focus. The front of the tank bottom is not visible
t17	2	18	0	0	fish at the bottom of the tank	out of focus. The front of the tank bottom is not visible
t17	3	0	0	0	fish at the bottom of the tank	out of focus. The front of the tank bottom is not visible
t17	3	1	0	0	fish at the bottom of the tank	out of focus. The front of the tank bottom is not visible
t17	3	2	0	0	fish at the bottom of the tank	out of focus. The front of the tank bottom is not visible
t17	3	3	0	0	fish at the bottom of the tank	out of focus. The front of the tank bottom is not visible
t17	3	4	0	0	fish at the bottom of the tank	out of focus. The front of the tank bottom is not visible
t17	3	5	0	0	fish at the bottom of the tank	out of focus. The front of the tank bottom is not visible
t17	3	6	0	0	fish at the bottom of the tank	out of focus. The front of the tank bottom is not visible
t17	3	7	0	0	fish at the bottom of the tank	out of focus. The front of the tank bottom is not visible
t17	3	8	0	0	fish at the bottom of the tank	out of focus. The front of the tank bottom is not visible
t17	3	9	0	0	fish at the bottom of the tank	out of focus. The front of the tank bottom is not visible
t17	3	10	0	0	fish at the bottom of the tank	out of focus. The front of the tank bottom is not visible
t17	3	11	0	0	fish at the bottom of the tank	out of focus. The front of the tank bottom is not visible
t17	3	12	0	0	fish at the bottom of the tank	out of focus. The front of the tank bottom is not visible
t17	3	13	0	0	fish at the bottom of the tank	out of focus. The front of the tank bottom is not visible
t17	3	14	0	0	fish at the bottom of the tank	out of focus. The front of the tank bottom is not visible
t17	3	15	0	0	fish at the bottom of the tank	out of focus. The front of the tank bottom is not visible
t17	3	16	0	0	fish at the bottom of the tank	out of focus. The front of the tank bottom is not visible
t17	3	17	0	0	fish at the bottom of the tank	out of focus. The front of the tank bottom is not visible
t17	3	18	0	0	fish at the bottom of the tank	out of focus. The front of the tank bottom is not visible
t17	4	0	0	0	fish at the bottom of the tank	out of focus. The front of the tank bottom is not visible
t17	4	1	0	0	fish at the bottom of the tank	out of focus. The front of the tank bottom is not visible
t17	4	2	0	0	fish at the bottom of the tank	out of focus. The front of the tank bottom is not visible
t17	4	3	0	0	fish at the bottom of the tank	out of focus. The front of the tank bottom is not visible
t17	4	4	0	0	fish at the bottom of the tank	out of focus. The front of the tank bottom is not visible
t17	4	5	0	0	fish at the bottom of the tank	out of focus. The front of the tank bottom is not visible
t17	4	6	0	0	fish at the bottom of the tank	out of focus. The front of the tank bottom is not visible
t17	4	7	0	0	fish at the bottom of the tank	out of focus. The front of the tank bottom is not visible
t17	4	8	0	0	fish at the bottom of the tank	out of focus. The front of the tank bottom is not visible
t17	4	9	0	0	fish at the bottom of the tank	out of focus. The front of the tank bottom is not visible
t17	4	10	0	0	fish at the bottom of the tank	out of focus. The front of the tank bottom is not visible
t17	4	11	0	0	fish at the bottom of the tank	out of focus. The front of the tank bottom is not visible
t17	4	12	0	0	fish at the bottom of the tank	out of focus. The front of the tank bottom is not visible
t17	4	13	0	0	fish at the bottom of the tank	out of focus. The front of the tank bottom is not visible
t17	4	14	0	0	fish at the bottom of the tank	out of focus. The front of the tank bottom is not visible
t17	4	15	0	0	fish at the bottom of the tank	out of focus. The front of the tank bottom is not visible
t17	4	16	0	0	fish at the bottom of the tank	out of focus. The front of the tank bottom is not visible
t17	4	17	0	0	fish at the bottom of the tank	out of focus. The front of the tank bottom is not visible
t17	4	18	0	0	fish at the bottom of the tank	out of focus. The front of the tank bottom is not visible
t17	5	0	0	0	fish at the bottom of the tank	out of focus. The front of the tank bottom is not visible
t17	5	1	0	0	fish at the bottom of the tank	out of focus. The front of the tank bottom is not visible
t17	5	2	0	0	fish at the bottom of the tank	out of focus. The front of the tank bottom is not visible
t17	5	3	0	0	fish at the bottom of the tank	out of focus. The front of the tank bottom is not visible
t17	5	4	0	0	fish at the bottom of the tank	out of focus. The front of the tank bottom is not visible
t17	5	5	0	0	fish at the bottom of the tank	out of focus. The front of the tank bottom is not visible
t17	5	6	0	0	fish at the bottom of the tank	out of focus. The front of the tank bottom is not visible
t17	5	7	0	0	fish at the bottom of the tank	out of focus. The front of the tank bottom is not visible
t17	5	8	0	0	fish at the bottom of the tank	out of focus. The front of the tank bottom is not visible
t17	5	9	0	0	fish at the bottom of the tank	out of focus. The front of the tank bottom is not visible
t17	5	10	0	0	fish at the bottom of the tank	out of focus. The front of the tank bottom is not visible
t17	5	11	0	0	fish at the bottom of the tank	out of focus. The front of the tank bottom is not visible
t17	5	12	0	0	fish at the bottom of the tank	out of focus. The front of the tank bottom is not visible
t17	5	13	0	0	fish at the bottom of the tank	out of focus. The front of the tank bottom is not visible
t17	5	14	0	0	fish at the bottom of the tank	out of focus. The front of the tank bottom is not visible
t17	5	15	0	0	fish at the bottom of the tank	out of focus. The front of the tank bottom is not visible
t17	5	16	0	0	fish at the bottom of the tank	out of focus. The front of the tank bottom is not visible
t17	5	17	0	0	fish at the bottom of the tank	out of focus. The front of the tank bottom is not visible
t17	5	18	0	0	fish at the bottom of the tank	out of focus. The front of the tank bottom is not visible
t17	6	0	0	0	fish at the bottom of the tank	out of focus. The front of the tank bottom is not visible
t17	6	1	0	0	fish at the bottom of the tank	out of focus. The front of the tank bottom is not visible
t17	6	2	1	0	fish at the bottom of the tank	out of focus. The front of the tank bottom is not visible
t17	6	3	0	0	fish at the bottom of the tank	out of focus. The front of the tank bottom is not visible
t17	6	4	0	0	fish at the bottom of the tank	out of focus. The front of the tank bottom is not visible
t17	6	5	0	0	fish at the bottom of the tank	out of focus. The front of the tank bottom is not visible
t17	6	6	0	0	fish at the bottom of the tank	out of focus. The front of the tank bottom is not visible
t17	6	7	0	0	fish at the bottom of the tank	out of focus. The front of the tank bottom is not visible
t17	6	8	0	0	fish at the bottom of the tank	out of focus. The front of the tank bottom is not visible
t17	6	9	0	0	fish at the bottom of the tank	out of focus. The front of the tank bottom is not visible
t17	6	10	0	0	fish at the bottom of the tank	out of focus. The front of the tank bottom is not visible
t17	6	11	0	0	fish at the bottom of the tank	out of focus. The front of the tank bottom is not visible
t17	6	12	0	0	fish at the bottom of the tank	out of focus. The front of the tank bottom is not visible
t17	6	13	0	0	fish at the bottom of the tank	out of focus. The front of the tank bottom is not visible
t17	6	14	0	0	fish at the bottom of the tank	out of focus. The front of the tank bottom is not visible
t17	6	15	0	0	fish at the bottom of the tank	out of focus. The front of the tank bottom is not visible
t17	6	16	0	0	fish at the bottom of the tank	out of focus. The front of the tank bottom is not visible
t17	6	17	0	0	fish at the bottom of the tank	out of focus. The front of the tank bottom is not visible
t17	6	18	0	0	fish at the bottom of the tank	out of focus. The front of the tank bottom is not visible
t17	7	0	0	0	fish at the bottom of the tank	out of focus. The front of the tank bottom is not visible
t17	7	1	0	0	fish at the bottom of the tank	out of focus. The front of the tank bottom is not visible
t17	7	2	0	0	fish at the bottom of the tank	out of focus. The front of the tank bottom is not visible
t17	7	3	0	0	fish at the bottom of the tank	out of focus. The front of the tank bottom is not visible
t17	7	4	0	0	fish at the bottom of the tank	out of focus. The front of the tank bottom is not visible
t17	7	5	0	0	fish at the bottom of the tank	out of focus. The front of the tank bottom is not visible
t17	7	6	0	0	fish at the bottom of the tank	out of focus. The front of the tank bottom is not visible
t17	7	7	0	0	fish at the bottom of the tank	out of focus. The front of the tank bottom is not visible
t17	7	8	0	0	fish at the bottom of the tank	out of focus. The front of the tank bottom is not visible
t17	7	9	0	0	fish at the bottom of the tank	out of focus. The front of the tank bottom is not visible
t17	7	10	0	0	fish at the bottom of the tank	out of focus. The front of the tank bottom is not visible
t17	7	11	0	0	fish at the bottom of the tank	out of focus. The front of the tank bottom is not visible
t17	7	12	0	0	fish at the bottom of the tank	out of focus. The front of the tank bottom is not visible
t17	7	13	0	0	fish at the bottom of the tank	out of focus. The front of the tank bottom is not visible
t17	7	14	0	0	fish at the bottom of the tank	out of focus. The front of the tank bottom is not visible
t17	7	15	0	0	fish at the bottom of the tank	out of focus. The front of the tank bottom is not visible
t17	7	16	0	0	fish at the bottom of the tank	out of focus. The front of the tank bottom is not visible
t17	7	17	0	0	fish at the bottom of the tank	out of focus. The front of the tank bottom is not visible
t17	7	18	0	0	fish at the bottom of the tank	out of focus. The front of the tank bottom is not visible
t17	8	0	0	0	fish in the middle of the tank	out of focus. The front of the tank bottom is not visible
t17	8	1	0	0	fish in the middle of the tank	out of focus. The front of the tank bottom is not visible
t17	8	2	0	0	move down	out of focus. The front of the tank bottom is not visible
t17	8	3	0	0		out of focus. The front of the tank bottom is not visible
t17	8	4	0	0		out of focus. The front of the tank bottom is not visible
t17	8	5	0	0		out of focus. The front of the tank bottom is not visible
t17	8	6	0	0		out of focus. The front of the tank bottom is not visible
t17	8	7	0	0		out of focus. The front of the tank bottom is not visible
t17	8	8	0	0		out of focus. The front of the tank bottom is not visible
t17	8	9	0	0		out of focus. The front of the tank bottom is not visible
t17	8	10	0	0		out of focus. The front of the tank bottom is not visible
t17	8	11	0	0		out of focus. The front of the tank bottom is not visible
t17	8	12	0	0		out of focus. The front of the tank bottom is not visible
t17	8	13	0	0		out of focus. The front of the tank bottom is not visible
t17	8	14	0	0		out of focus. The front of the tank bottom is not visible
t17	8	15	0	0		out of focus. The front of the tank bottom is not visible
t17	8	16	0	0		out of focus. The front of the tank bottom is not visible
t17	8	17	0	0		out of focus. The front of the tank bottom is not visible
t17	8	18	0	0		out of focus. The front of the tank bottom is not visible
t17	9	0	0	0	fish at the bottom of the tank	out of focus. The front of the tank bottom is not visible
t17	9	1	0	0	fish at the bottom of the tank	out of focus. The front of the tank bottom is not visible
t17	9	2	0	0	fish at the bottom of the tank	out of focus. The front of the tank bottom is not visible
t17	9	3	0	0	fish at the bottom of the tank	out of focus. The front of the tank bottom is not visible
t17	9	4	0	0	fish at the bottom of the tank	out of focus. The front of the tank bottom is not visible
t17	9	5	0	0	fish at the bottom of the tank	out of focus. The front of the tank bottom is not visible
t17	9	6	0	0	fish at the bottom of the tank	out of focus. The front of the tank bottom is not visible
t17	9	7	0	0	fish at the bottom of the tank	out of focus. The front of the tank bottom is not visible
t17	9	8	0	0	fish at the bottom of the tank	out of focus. The front of the tank bottom is not visible
t17	9	9	0	0	fish at the bottom of the tank	out of focus. The front of the tank bottom is not visible
t17	9	10	0	0	fish at the bottom of the tank	out of focus. The front of the tank bottom is not visible
t17	9	11	0	0	fish at the bottom of the tank	out of focus. The front of the tank bottom is not visible
t17	9	12	0	0	fish at the bottom of the tank	out of focus. The front of the tank bottom is not visible
t17	9	13	0	0	fish at the bottom of the tank	out of focus. The front of the tank bottom is not visible
t17	9	14	0	0	fish at the bottom of the tank	out of focus. The front of the tank bottom is not visible
t17	9	15	0	0	fish at the bottom of the tank	out of focus. The front of the tank bottom is not visible
t17	9	16	0	0	fish at the bottom of the tank	out of focus. The front of the tank bottom is not visible
t17	9	17	0	0	fish at the bottom of the tank	out of focus. The front of the tank bottom is not visible
t17	9	18	0	0	fish at the bottom of the tank	out of focus. The front of the tank bottom is not visible
t17	10	0	0	0	fish at the bottom of the tank	out of focus. The front of the tank bottom is not visible
t17	10	1	0	0	fish at the bottom of the tank	out of focus. The front of the tank bottom is not visible
t17	10	2	0	0	fish at the bottom of the tank	out of focus. The front of the tank bottom is not visible
t17	10	3	0	0	fish at the bottom of the tank	out of focus. The front of the tank bottom is not visible
t17	10	4	0	0	fish at the bottom of the tank	out of focus. The front of the tank bottom is not visible
t17	10	5	0	0	fish at the bottom of the tank	out of focus. The front of the tank bottom is not visible
t17	10	6	0	0	fish at the bottom of the tank	out of focus. The front of the tank bottom is not visible
t17	10	7	0	0	fish at the bottom of the tank	out of focus. The front of the tank bottom is not visible
t17	10	8	0	0	fish at the bottom of the tank	out of focus. The front of the tank bottom is not visible
t17	10	9	0	0	fish at the bottom of the tank	out of focus. The front of the tank bottom is not visible
t17	10	10	0	0	fish at the bottom of the tank	out of focus. The front of the tank bottom is not visible
t17	10	11	0	0	fish at the bottom of the tank	out of focus. The front of the tank bottom is not visible
t17	10	12	0	0	fish at the bottom of the tank	out of focus. The front of the tank bottom is not visible
t17	10	13	0	0	fish at the bottom of the tank	out of focus. The front of the tank bottom is not visible
t17	10	14	0	0	fish at the bottom of the tank	out of focus. The front of the tank bottom is not visible
t17	10	15	0	0	fish at the bottom of the tank	out of focus. The front of the tank bottom is not visible
t17	10	16	0	0	fish at the bottom of the tank	out of focus. The front of the tank bottom is not visible
t17	10	17	0	0	fish at the bottom of the tank	out of focus. The front of the tank bottom is not visible
t17	10	18	0	0	fish at the bottom of the tank	out of focus. The front of the tank bottom is not visible
t17	11	0	0	0	fish at the bottom of the tank	out of focus. The front of the tank bottom is not visible
t17	11	1	0	0	fish at the bottom of the tank	out of focus. The front of the tank bottom is not visible
t17	11	2	0	0	fish at the bottom of the tank	out of focus. The front of the tank bottom is not visible
t17	11	3	0	0	fish at the bottom of the tank	out of focus. The front of the tank bottom is not visible
t17	11	4	1	0	fish at the bottom of the tank	out of focus. The front of the tank bottom is not visible
t17	11	5	0	0	fish at the bottom of the tank	out of focus. The front of the tank bottom is not visible
t17	11	6	0	0	fish at the bottom of the tank	out of focus. The front of the tank bottom is not visible
t17	11	7	0	0	fish at the bottom of the tank	out of focus. The front of the tank bottom is not visible
t17	11	8	0	0	fish at the bottom of the tank	out of focus. The front of the tank bottom is not visible
t17	11	9	0	0	fish at the bottom of the tank	out of focus. The front of the tank bottom is not visible
t17	11	10	0	0	fish at the bottom of the tank	out of focus. The front of the tank bottom is not visible
t17	11	11	0	0	fish at the bottom of the tank	out of focus. The front of the tank bottom is not visible
t17	11	12	0	0	fish at the bottom of the tank	out of focus. The front of the tank bottom is not visible
t17	11	13	0	0	fish at the bottom of the tank	out of focus. The front of the tank bottom is not visible
t17	11	14	0	0	fish at the bottom of the tank	out of focus. The front of the tank bottom is not visible
t17	11	15	0	0	fish at the bottom of the tank	out of focus. The front of the tank bottom is not visible
t17	11	16	0	0	fish at the bottom of the tank	out of focus. The front of the tank bottom is not visible
t17	11	17	0	0	fish at the bottom of the tank	out of focus. The front of the tank bottom is not visible
t17	11	18	0	0	fish at the bottom of the tank	out of focus. The front of the tank bottom is not visible
t17	12	0	0	0	fish at the bottom of the tank	out of focus. The front of the tank bottom is not visible
t17	12	1	1	0	fish at the bottom of the tank	out of focus. The front of the tank bottom is not visible
t17	12	2	0	0	fish at the bottom of the tank	out of focus. The front of the tank bottom is not visible
t17	12	3	0	0	fish at the bottom of the tank	out of focus. The front of the tank bottom is not visible
t17	12	4	0	0	fish at the bottom of the tank	out of focus. The front of the tank bottom is not visible
t17	12	5	0	0	fish at the bottom of the tank	out of focus. The front of the tank bottom is not visible
t17	12	6	0	0	fish at the bottom of the tank	out of focus. The front of the tank bottom is not visible
t17	12	7	0	0	fish at the bottom of the tank	out of focus. The front of the tank bottom is not visible
t17	12	8	0	0	fish at the bottom of the tank	out of focus. The front of the tank bottom is not visible
t17	12	9	0	0	fish at the bottom of the tank	out of focus. The front of the tank bottom is not visible
t17	12	10	0	0	fish at the bottom of the tank	out of focus. The front of the tank bottom is not visible
t17	12	11	0	0	fish at the bottom of the tank	out of focus. The front of the tank bottom is not visible
t17	12	12	0	0	fish at the bottom of the tank	out of focus. The front of the tank bottom is not visible
t17	12	13	0	0	fish at the bottom of the tank	out of focus. The front of the tank bottom is not visible
t17	12	14	0	0	fish at the bottom of the tank	out of focus. The front of the tank bottom is not visible
t17	12	15	0	0	fish at the bottom of the tank	out of focus. The front of the tank bottom is not visible
t17	12	16	0	0	fish at the bottom of the tank	out of focus. The front of the tank bottom is not visible
t17	12	17	0	0	fish at the bottom of the tank	out of focus. The front of the tank bottom is not visible
t17	12	18	0	0	fish at the bottom of the tank	out of focus. The front of the tank bottom is not visible
t17	13	0	0	0	fish at the bottom of the tank	out of focus. The front of the tank bottom is not visible
t17	13	1	0	0	fish at the bottom of the tank	out of focus. The front of the tank bottom is not visible
t17	13	2	0	0	fish at the bottom of the tank	out of focus. The front of the tank bottom is not visible
t17	13	3	0	0	fish at the bottom of the tank	out of focus. The front of the tank bottom is not visible
t17	13	4	0	0	fish at the bottom of the tank	out of focus. The front of the tank bottom is not visible
t17	13	5	0	0	fish at the bottom of the tank	out of focus. The front of the tank bottom is not visible
t17	13	6	0	0	fish at the bottom of the tank	out of focus. The front of the tank bottom is not visible
t17	13	7	0	0	fish at the bottom of the tank	out of focus. The front of the tank bottom is not visible
t17	13	8	0	0	fish at the bottom of the tank	out of focus. The front of the tank bottom is not visible
t17	13	9	0	0	fish at the bottom of the tank	out of focus. The front of the tank bottom is not visible
t17	13	10	0	0	fish at the bottom of the tank	out of focus. The front of the tank bottom is not visible
t17	13	11	0	0	fish at the bottom of the tank	out of focus. The front of the tank bottom is not visible
t17	13	12	0	0	fish at the bottom of the tank	out of focus. The front of the tank bottom is not visible
t17	13	13	0	0	fish at the bottom of the tank	out of focus. The front of the tank bottom is not visible
t17	13	14	0	0	fish at the bottom of the tank	out of focus. The front of the tank bottom is not visible
t17	13	15	0	0	fish at the bottom of the tank	out of focus. The front of the tank bottom is not visible
t17	13	16	0	0	fish at the bottom of the tank	out of focus. The front of the tank bottom is not visible
t17	13	17	0	0	fish at the bottom of the tank	out of focus. The front of the tank bottom is not visible
t17	13	18	0	0	fish at the bottom of the tank	out of focus. The front of the tank bottom is not visible
t17	14	0	0	0	fish at the bottom of the tank	out of focus. The front of the tank bottom is not visible
t17	14	1	0	0	fish at the bottom of the tank	out of focus. The front of the tank bottom is not visible
t17	14	2	0	0	fish at the bottom of the tank	out of focus. The front of the tank bottom is not visible
t17	14	3	0	0	fish at the bottom of the tank	out of focus. The front of the tank bottom is not visible
t17	14	4	0	0	fish at the bottom of the tank	out of focus. The front of the tank bottom is not visible
t17	14	5	0	0	fish at the bottom of the tank	out of focus. The front of the tank bottom is not visible
t17	14	6	0	0	fish at the bottom of the tank	out of focus. The front of the tank bottom is not visible
t17	14	7	0	0	fish at the bottom of the tank	out of focus. The front of the tank bottom is not visible
t17	14	8	0	0	fish at the bottom of the tank	out of focus. The front of the tank bottom is not visible
t17	14	9	0	0	fish at the bottom of the tank	out of focus. The front of the tank bottom is not visible
t17	14	10	0	0	fish at the bottom of the tank	out of focus. The front of the tank bottom is not visible
t17	14	11	0	0	fish at the bottom of the tank	out of focus. The front of the tank bottom is not visible
t17	14	12	0	0	fish at the bottom of the tank	out of focus. The front of the tank bottom is not visible
t17	14	13	0	0	fish at the bottom of the tank	out of focus. The front of the tank bottom is not visible
t17	14	14	0	0	fish at the bottom of the tank	out of focus. The front of the tank bottom is not visible
t17	14	15	0	0	fish at the bottom of the tank	out of focus. The front of the tank bottom is not visible
t17	14	16	0	0	fish at the bottom of the tank	out of focus. The front of the tank bottom is not visible
t17	14	17	0	0	fish at the bottom of the tank	out of focus. The front of the tank bottom is not visible
t17	14	18	0	0	fish at the bottom of the tank	out of focus. The front of the tank bottom is not visible
t17	15	0	0	0	fish at the bottom of the tank	out of focus. The front of the tank bottom is not visible
t17	15	1	0	0	fish at the bottom of the tank	out of focus. The front of the tank bottom is not visible
t17	15	2	0	0	fish at the bottom of the tank	out of focus. The front of the tank bottom is not visible
t17	15	3	0	0	fish at the bottom of the tank	out of focus. The front of the tank bottom is not visible
t17	15	4	0	0	fish at the bottom of the tank	out of focus. The front of the tank bottom is not visible
t17	15	5	0	0	fish at the bottom of the tank	out of focus. The front of the tank bottom is not visible
t17	15	6	0	0	fish at the bottom of the tank	out of focus. The front of the tank bottom is not visible
t17	15	7	0	0	fish at the bottom of the tank	out of focus. The front of the tank bottom is not visible
t17	15	8	0	0	fish at the bottom of the tank	out of focus. The front of the tank bottom is not visible
t17	15	9	0	0	fish at the bottom of the tank	out of focus. The front of the tank bottom is not visible
t17	15	10	0	0	fish at the bottom of the tank	out of focus. The front of the tank bottom is not visible
t17	15	11	0	0	fish at the bottom of the tank	out of focus. The front of the tank bottom is not visible
t17	15	12	0	0	fish at the bottom of the tank	out of focus. The front of the tank bottom is not visible
t17	15	13	0	0	fish at the bottom of the tank	out of focus. The front of the tank bottom is not visible
t17	15	14	0	0	fish at the bottom of the tank	out of focus. The front of the tank bottom is not visible
t17	15	15	0	0	fish at the bottom of the tank	out of focus. The front of the tank bottom is not visible
t17	15	16	0	0	fish at the bottom of the tank	out of focus. The front of the tank bottom is not visible
t17	15	17	0	0	fish at the bottom of the tank	out of focus. The front of the tank bottom is not visible
t17	15	18	0	0	fish at the bottom of the tank	out of focus. The front of the tank bottom is not visible
t17	16	0	0	0	fish at the bottom of the tank	out of focus. The front of the tank bottom is not visible
t17	16	1	1	0	fish at the bottom of the tank	out of focus. The front of the tank bottom is not visible
t17	16	2	0	0	fish at the bottom of the tank	out of focus. The front of the tank bottom is not visible
t17	16	3	0	0	fish at the bottom of the tank	out of focus. The front of the tank bottom is not visible
t17	16	4	0	0	fish at the bottom of the tank	out of focus. The front of the tank bottom is not visible
t17	16	5	0	0	fish at the bottom of the tank	out of focus. The front of the tank bottom is not visible
t17	16	6	0	0	fish at the bottom of the tank	out of focus. The front of the tank bottom is not visible
t17	16	7	0	0	fish at the bottom of the tank	out of focus. The front of the tank bottom is not visible
t17	16	8	0	0	fish at the bottom of the tank	out of focus. The front of the tank bottom is not visible
t17	16	9	0	0	fish at the bottom of the tank	out of focus. The front of the tank bottom is not visible
t17	16	10	0	0	fish at the bottom of the tank	out of focus. The front of the tank bottom is not visible
t17	16	11	0	0	fish at the bottom of the tank	out of focus. The front of the tank bottom is not visible
t17	16	12	0	0	fish at the bottom of the tank	out of focus. The front of the tank bottom is not visible
t17	16	13	0	0	fish at the bottom of the tank	out of focus. The front of the tank bottom is not visible
t17	16	14	0	0	fish at the bottom of the tank	out of focus. The front of the tank bottom is not visible
t17	16	15	0	0	fish at the bottom of the tank	out of focus. The front of the tank bottom is not visible
t17	16	16	0	0	fish at the bottom of the tank	out of focus. The front of the tank bottom is not visible
t17	16	17	0	0	fish at the bottom of the tank	out of focus. The front of the tank bottom is not visible
t17	16	18	0	0	fish at the bottom of the tank	out of focus. The front of the tank bottom is not visible
t17	17	0	0	0	fish at the bottom of the tank	out of focus. The front of the tank bottom is not visible
t17	17	1	0	0	fish at the bottom of the tank	out of focus. The front of the tank bottom is not visible
t17	17	2	0	0	fish at the bottom of the tank	out of focus. The front of the tank bottom is not visible
t17	17	3	0	0	fish at the bottom of the tank	out of focus. The front of the tank bottom is not visible
t17	17	4	0	0	fish at the bottom of the tank	out of focus. The front of the tank bottom is not visible
t17	17	5	0	0	fish at the bottom of the tank	out of focus. The front of the tank bottom is not visible
t17	17	6	0	0	fish at the bottom of the tank	out of focus. The front of the tank bottom is not visible
t17	17	7	0	0	fish at the bottom of the tank	out of focus. The front of the tank bottom is not visible
t17	17	8	0	0	fish at the bottom of the tank	out of focus. The front of the tank bottom is not visible
t17	17	9	0	0	fish at the bottom of the tank	out of focus. The front of the tank bottom is not visible
t17	17	10	0	0	fish at the bottom of the tank	out of focus. The front of the tank bottom is not visible
t17	17	11	0	0	fish at the bottom of the tank	out of focus. The front of the tank bottom is not visible
t17	17	12	0	0	fish at the bottom of the tank	out of focus. The front of the tank bottom is not visible
t17	17	13	0	0	fish at the bottom of the tank	out of focus. The front of the tank bottom is not visible
t17	17	14	0	0	fish at the bottom of the tank	out of focus. The front of the tank bottom is not visible
t17	17	15	0	0	fish at the bottom of the tank	out of focus. The front of the tank bottom is not visible
t17	17	16	0	0	fish at the bottom of the tank	out of focus. The front of the tank bottom is not visible
t17	17	17	0	0	fish at the bottom of the tank	out of focus. The front of the tank bottom is not visible
t17	17	18	0	0	fish at the bottom of the tank	out of focus. The front of the tank bottom is not visible
t17	18	0	0	0		out of focus. The front of the tank bottom is not visible
t17	18	1	0	0		out of focus. The front of the tank bottom is not visible
t17	18	2	1	0		out of focus. The front of the tank bottom is not visible
t17	18	3	1	0		out of focus. The front of the tank bottom is not visible
t17	18	4	0	0		out of focus. The front of the tank bottom is not visible
t17	18	5	0	0		out of focus. The front of the tank bottom is not visible
t17	18	6	0	0		out of focus. The front of the tank bottom is not visible
t17	18	7	0	0		out of focus. The front of the tank bottom is not visible
t17	18	8	0	0		out of focus. The front of the tank bottom is not visible
t17	18	9	0	0		out of focus. The front of the tank bottom is not visible
t17	18	10	0	0		out of focus. The front of the tank bottom is not visible
t17	18	11	1	0		out of focus. The front of the tank bottom is not visible
t17	18	12	1	0		out of focus. The front of the tank bottom is not visible
t17	18	13	0	1	eating	out of focus. The front of the tank bottom is not visible
t17	18	14	0	1	eating	out of focus. The front of the tank bottom is not visible
t17	18	15	0	1	eating	out of focus. The front of the tank bottom is not visible
t17	18	16	0	1	eating	out of focus. The front of the tank bottom is not visible
t17	18	17	0	1	eating	out of focus. The front of the tank bottom is not visible
t17	18	18	0	1	eating	out of focus. The front of the tank bottom is not visible
t17	19	0	0	0		out of focus. The front of the tank bottom is not visible
t17	19	1	0	0		out of focus. The front of the tank bottom is not visible
t17	19	2	0	0		out of focus. The front of the tank bottom is not visible
t17	19	3	0	0		out of focus. The front of the tank bottom is not visible
t17	19	4	0	0		out of focus. The front of the tank bottom is not visible
t17	19	5	0	0		out of focus. The front of the tank bottom is not visible
t17	19	6	0	0		out of focus. The front of the tank bottom is not visible
t17	19	7	0	0		out of focus. The front of the tank bottom is not visible
t17	19	8	0	0		out of focus. The front of the tank bottom is not visible
t17	19	9	0	0		out of focus. The front of the tank bottom is not visible
t17	19	10	0	0		out of focus. The front of the tank bottom is not visible
t17	19	11	0	0		out of focus. The front of the tank bottom is not visible
t17	19	12	0	0		out of focus. The front of the tank bottom is not visible
t17	19	13	1	0		out of focus. The front of the tank bottom is not visible
t17	19	14	1	0		out of focus. The front of the tank bottom is not visible
t17	19	15	1	0		out of focus. The front of the tank bottom is not visible
t17	19	16	1	0		out of focus. The front of the tank bottom is not visible
t17	19	17	1	0		out of focus. The front of the tank bottom is not visible
t17	19	18	0	1	eating	out of focus. The front of the tank bottom is not visible
t17	20	0	0	0		out of focus. The front of the tank bottom is not visible
t17	20	1	0	0		out of focus. The front of the tank bottom is not visible
t17	20	2	0	0		out of focus. The front of the tank bottom is not visible
t17	20	3	0	0		out of focus. The front of the tank bottom is not visible
t17	20	4	0	0		out of focus. The front of the tank bottom is not visible
t17	20	5	0	0		out of focus. The front of the tank bottom is not visible
t17	20	6	0	0		out of focus. The front of the tank bottom is not visible
t17	20	7	0	0		out of focus. The front of the tank bottom is not visible
t17	20	8	0	0		out of focus. The front of the tank bottom is not visible
t17	20	9	0	0		out of focus. The front of the tank bottom is not visible
t17	20	10	0	0		out of focus. The front of the tank bottom is not visible
t17	20	11	0	0		out of focus. The front of the tank bottom is not visible
t17	20	12	0	0		out of focus. The front of the tank bottom is not visible
t17	20	13	1	0		out of focus. The front of the tank bottom is not visible
t17	20	14	1	0		out of focus. The front of the tank bottom is not visible
t17	20	15	1	0		out of focus. The front of the tank bottom is not visible
t17	20	16	1	0		out of focus. The front of the tank bottom is not visible
t17	20	17	1	0		out of focus. The front of the tank bottom is not visible
t17	20	18	1	0	ultimately reaches the surface and eating	out of focus. The front of the tank bottom is not visible
t17	21	0	0	0	fish at the bottom of the tank	out of focus. The front of the tank bottom is not visible
t17	21	1	0	0	fish at the bottom of the tank	out of focus. The front of the tank bottom is not visible
t17	21	2	0	0	fish at the bottom of the tank	out of focus. The front of the tank bottom is not visible
t17	21	3	0	0	fish at the bottom of the tank	out of focus. The front of the tank bottom is not visible
t17	21	4	0	0	fish at the bottom of the tank	out of focus. The front of the tank bottom is not visible
t17	21	5	0	0	fish at the bottom of the tank	out of focus. The front of the tank bottom is not visible
t17	21	6	0	0	fish at the bottom of the tank	out of focus. The front of the tank bottom is not visible
t17	21	7	0	0	fish at the bottom of the tank	out of focus. The front of the tank bottom is not visible
t17	21	8	0	0	fish at the bottom of the tank	out of focus. The front of the tank bottom is not visible
t17	21	9	0	0	fish at the bottom of the tank	out of focus. The front of the tank bottom is not visible
t17	21	10	0	0	fish at the bottom of the tank	out of focus. The front of the tank bottom is not visible
t17	21	11	0	0	fish at the bottom of the tank	out of focus. The front of the tank bottom is not visible
t17	21	12	0	0	fish at the bottom of the tank	out of focus. The front of the tank bottom is not visible
t17	21	13	0	0	fish at the bottom of the tank	out of focus. The front of the tank bottom is not visible
t17	21	14	0	0	fish at the bottom of the tank	out of focus. The front of the tank bottom is not visible
t17	21	15	0	0	fish at the bottom of the tank	out of focus. The front of the tank bottom is not visible
t17	21	16	0	0	fish at the bottom of the tank	out of focus. The front of the tank bottom is not visible
t17	21	17	0	0	fish at the bottom of the tank	out of focus. The front of the tank bottom is not visible
t17	21	18	0	0	fish at the bottom of the tank	out of focus. The front of the tank bottom is not visible

## Sheet: Fish_18
Animal ID (WT)	Video #	Second #	Animal Moving Upward? (any displacement toward the light's direction, inferred from the position the next second) (1 = yes; 0 = no)	Animal at Surface? (1 = yes; 0 = no)	Behavior Notes	Video Quality Notes	Other notes
t18	0	0	0	0	fish at the bottom of the tank	out of focus
t18	0	1	0	0	fish at the bottom of the tank	out of focus
t18	0	2	0	0	fish at the bottom of the tank	out of focus
t18	0	3	0	0	fish at the bottom of the tank	out of focus
t18	0	4	0	0	fish at the bottom of the tank	out of focus
t18	0	5	0	0	fish at the bottom of the tank	out of focus
t18	0	6	0	0	fish at the bottom of the tank	out of focus
t18	0	7	0	0	fish at the bottom of the tank	out of focus
t18	0	8	0	0	fish at the bottom of the tank	out of focus
t18	0	9	0	0	fish at the bottom of the tank	out of focus
t18	0	10	0	0	fish at the bottom of the tank	out of focus
t18	0	11	0	0	fish at the bottom of the tank	out of focus
t18	0	12	0	0	fish at the bottom of the tank	out of focus
t18	0	13	0	0	fish at the bottom of the tank	out of focus
t18	0	14	0	0	fish at the bottom of the tank	out of focus
t18	0	15	0	0	fish at the bottom of the tank	out of focus
t18	0	16	0	0	fish at the bottom of the tank	out of focus
t18	0	17	0	0	fish at the bottom of the tank	out of focus
t18	0	18	0	0	fish at the bottom of the tank	out of focus
t18	1	0	0	0		out of focus
t18	1	1	0	0		out of focus
t18	1	2	0	0		out of focus
t18	1	3	0	0		out of focus
t18	1	4	0	0		out of focus
t18	1	5	1	0		out of focus
t18	1	6	1	0		out of focus
t18	1	7	1	0		out of focus
t18	1	8	0	0		out of focus
t18	1	9	0	0		out of focus
t18	1	10	0	0		out of focus
t18	1	11	0	0		out of focus
t18	1	12	0	0		out of focus
t18	1	13	0	0		out of focus
t18	1	14	0	0		out of focus
t18	1	15	0	0		out of focus
t18	1	16	0	0		out of focus
t18	1	17	0	0		out of focus
t18	1	18	0	0		out of focus
t18	2	0	0	0	fish at the bottom of the tank	out of focus
t18	2	1	0	0	fish at the bottom of the tank	out of focus
t18	2	2	0	0	fish at the bottom of the tank	out of focus
t18	2	3	0	0	fish at the bottom of the tank	out of focus
t18	2	4	0	0	fish at the bottom of the tank	out of focus
t18	2	5	0	0	fish at the bottom of the tank	out of focus
t18	2	6	0	0	fish at the bottom of the tank	out of focus
t18	2	7	0	0	fish at the bottom of the tank	out of focus
t18	2	8	0	0	fish at the bottom of the tank	out of focus
t18	2	9	0	0	fish at the bottom of the tank	out of focus
t18	2	10	0	0	fish at the bottom of the tank	out of focus
t18	2	11	0	0	fish at the bottom of the tank	out of focus
t18	2	12	0	0	fish at the bottom of the tank	out of focus
t18	2	13	0	0	fish at the bottom of the tank	out of focus
t18	2	14	0	0	fish at the bottom of the tank	out of focus
t18	2	15	0	0	fish at the bottom of the tank	out of focus
t18	2	16	0	0	fish at the bottom of the tank	out of focus
t18	2	17	0	0	fish at the bottom of the tank	out of focus
t18	2	18	0	0	fish at the bottom of the tank	out of focus
t18	3	0	0	0	fish at the bottom of the tank	out of focus
t18	3	1	0	0	fish at the bottom of the tank	out of focus
t18	3	2	0	0	fish at the bottom of the tank	out of focus
t18	3	3	0	0	fish at the bottom of the tank	out of focus
t18	3	4	0	0	fish at the bottom of the tank	out of focus
t18	3	5	0	0	fish at the bottom of the tank	out of focus
t18	3	6	0	0	fish at the bottom of the tank	out of focus
t18	3	7	0	0	fish at the bottom of the tank	out of focus
t18	3	8	0	0	fish at the bottom of the tank	out of focus
t18	3	9	0	0	fish at the bottom of the tank	out of focus
t18	3	10	0	0	fish at the bottom of the tank	out of focus
t18	3	11	0	0	fish at the bottom of the tank	out of focus
t18	3	12	0	0	fish at the bottom of the tank	out of focus
t18	3	13	0	0	fish at the bottom of the tank	out of focus
t18	3	14	0	0	fish at the bottom of the tank	out of focus
t18	3	15	0	0	fish at the bottom of the tank	out of focus
t18	3	16	0	0	fish at the bottom of the tank	out of focus
t18	3	17	0	0	fish at the bottom of the tank	out of focus
t18	3	18	0	0	fish at the bottom of the tank	out of focus
t18	4	0	0	0	fish at the bottom of the tank	out of focus
t18	4	1	0	0	fish at the bottom of the tank	out of focus
t18	4	2	0	0	fish at the bottom of the tank	out of focus
t18	4	3	0	0	fish at the bottom of the tank	out of focus
t18	4	4	0	0	fish at the bottom of the tank	out of focus
t18	4	5	0	0	fish at the bottom of the tank	out of focus
t18	4	6	0	0	fish at the bottom of the tank	out of focus
t18	4	7	0	0	fish at the bottom of the tank	out of focus
t18	4	8	0	0	fish at the bottom of the tank	out of focus
t18	4	9	0	0	fish at the bottom of the tank	out of focus
t18	4	10	0	0	fish at the bottom of the tank	out of focus
t18	4	11	0	0	fish at the bottom of the tank	out of focus
t18	4	12	0	0	fish at the bottom of the tank	out of focus
t18	4	13	0	0	fish at the bottom of the tank	out of focus
t18	4	14	0	0	fish at the bottom of the tank	out of focus
t18	4	15	0	0	fish at the bottom of the tank	out of focus
t18	4	16	0	0	fish at the bottom of the tank	out of focus
t18	4	17	0	0	fish at the bottom of the tank	out of focus
t18	4	18	0	0	fish at the bottom of the tank	out of focus
t18	5	0	0	0	fish at the bottom of the tank	out of focus
t18	5	1	0	0	fish at the bottom of the tank	out of focus
t18	5	2	0	0	fish at the bottom of the tank	out of focus
t18	5	3	0	0	fish at the bottom of the tank	out of focus
t18	5	4	0	0	fish at the bottom of the tank	out of focus
t18	5	5	0	0	fish at the bottom of the tank	out of focus
t18	5	6	0	0	fish at the bottom of the tank	out of focus
t18	5	7	0	0	fish at the bottom of the tank	out of focus
t18	5	8	0	0	fish at the bottom of the tank	out of focus
t18	5	9	0	0	fish at the bottom of the tank	out of focus
t18	5	10	0	0	fish at the bottom of the tank	out of focus
t18	5	11	0	0	fish at the bottom of the tank	out of focus
t18	5	12	0	0	fish at the bottom of the tank	out of focus
t18	5	13	0	0	fish at the bottom of the tank	out of focus
t18	5	14	0	0	fish at the bottom of the tank	out of focus
t18	5	15	0	0	fish at the bottom of the tank	out of focus
t18	5	16	0	0	fish at the bottom of the tank	out of focus
t18	5	17	0	0	fish at the bottom of the tank	out of focus
t18	5	18	0	0	fish at the bottom of the tank	out of focus
t18	6	0	0	0	fish at the bottom of the tank	out of focus
t18	6	1	0	0	fish at the bottom of the tank	out of focus
t18	6	2	0	0	fish at the bottom of the tank	out of focus
t18	6	3	0	0	fish at the bottom of the tank	out of focus
t18	6	4	0	0	fish at the bottom of the tank	out of focus
t18	6	5	0	0	fish at the bottom of the tank	out of focus
t18	6	6	0	0	fish at the bottom of the tank	out of focus
t18	6	7	0	0	fish at the bottom of the tank	out of focus
t18	6	8	0	0	fish at the bottom of the tank	out of focus
t18	6	9	0	0	fish at the bottom of the tank	out of focus
t18	6	10	0	0	fish at the bottom of the tank	out of focus
t18	6	11	0	0	fish at the bottom of the tank	out of focus
t18	6	12	0	0	fish at the bottom of the tank	out of focus
t18	6	13	0	0	fish at the bottom of the tank	out of focus
t18	6	14	0	0	fish at the bottom of the tank	out of focus
t18	6	15	0	0	fish at the bottom of the tank	out of focus
t18	6	16	0	0	fish at the bottom of the tank	out of focus
t18	6	17	0	0	fish at the bottom of the tank	out of focus
t18	6	18	0	0	fish at the bottom of the tank	out of focus
t18	7	0	0	0	fish at the bottom of the tank	out of focus
t18	7	1	0	0	fish at the bottom of the tank	out of focus
t18	7	2	0	0	fish at the bottom of the tank	out of focus
t18	7	3	0	0	fish at the bottom of the tank	out of focus
t18	7	4	0	0	fish at the bottom of the tank	out of focus
t18	7	5	0	0	fish at the bottom of the tank	out of focus
t18	7	6	0	0	fish at the bottom of the tank	out of focus
t18	7	7	0	0	fish at the bottom of the tank	out of focus
t18	7	8	0	0	fish at the bottom of the tank	out of focus
t18	7	9	0	0	fish at the bottom of the tank	out of focus
t18	7	10	0	0	fish at the bottom of the tank	out of focus
t18	7	11	0	0	fish at the bottom of the tank	out of focus
t18	7	12	0	0	fish at the bottom of the tank	out of focus
t18	7	13	0	0	fish at the bottom of the tank	out of focus
t18	7	14	0	0	fish at the bottom of the tank	out of focus
t18	7	15	0	0	fish at the bottom of the tank	out of focus
t18	7	16	0	0	fish at the bottom of the tank	out of focus
t18	7	17	0	0	fish at the bottom of the tank	out of focus
t18	7	18	0	0	fish at the bottom of the tank	out of focus
t18	8	0	0	0	fish at the bottom of the tank. Not moved	out of focus
t18	8	1	0	0	fish at the bottom of the tank. Not moved	out of focus
t18	8	2	0	0	fish at the bottom of the tank. Not moved	out of focus
t18	8	3	0	0	fish at the bottom of the tank. Not moved	out of focus
t18	8	4	0	0	fish at the bottom of the tank. Not moved	out of focus
t18	8	5	0	0	fish at the bottom of the tank. Not moved	out of focus
t18	8	6	0	0	fish at the bottom of the tank. Not moved	out of focus
t18	8	7	0	0	fish at the bottom of the tank. Not moved	out of focus
t18	8	8	0	0	fish at the bottom of the tank. Not moved	out of focus
t18	8	9	0	0	fish at the bottom of the tank. Not moved	out of focus
t18	8	10	0	0	fish at the bottom of the tank. Not moved	out of focus
t18	8	11	0	0	fish at the bottom of the tank. Not moved	out of focus
t18	8	12	0	0	fish at the bottom of the tank. Not moved	out of focus
t18	8	13	0	0	fish at the bottom of the tank. Not moved	out of focus
t18	8	14	0	0	fish at the bottom of the tank. Not moved	out of focus
t18	8	15	0	0	fish at the bottom of the tank. Not moved	out of focus
t18	8	16	0	0	fish at the bottom of the tank. Not moved	out of focus
t18	8	17	0	0	fish at the bottom of the tank. Not moved	out of focus
t18	8	18	0	0	fish at the bottom of the tank. Not moved	out of focus
t18	9	0	0	0	fish at the bottom of the tank. Not moved	out of focus
t18	9	1	0	0	fish at the bottom of the tank. Not moved	out of focus
t18	9	2	0	0	fish at the bottom of the tank. Not moved	out of focus
t18	9	3	0	0	fish at the bottom of the tank. Not moved	out of focus
t18	9	4	0	0	fish at the bottom of the tank. Not moved	out of focus
t18	9	5	0	0	fish at the bottom of the tank. Not moved	out of focus
t18	9	6	0	0	fish at the bottom of the tank. Not moved	out of focus
t18	9	7	0	0	fish at the bottom of the tank. Not moved	out of focus
t18	9	8	0	0	fish at the bottom of the tank. Not moved	out of focus
t18	9	9	0	0	fish at the bottom of the tank. Not moved	out of focus
t18	9	10	0	0	fish at the bottom of the tank. Not moved	out of focus
t18	9	11	0	0	fish at the bottom of the tank. Not moved	out of focus
t18	9	12	0	0	fish at the bottom of the tank. Not moved	out of focus
t18	9	13	0	0	fish at the bottom of the tank. Not moved	out of focus
t18	9	14	0	0	fish at the bottom of the tank. Not moved	out of focus
t18	9	15	0	0	fish at the bottom of the tank. Not moved	out of focus
t18	9	16	0	0	fish at the bottom of the tank. Not moved	out of focus
t18	9	17	0	0	fish at the bottom of the tank. Not moved	out of focus
t18	9	18	0	0	fish at the bottom of the tank. Not moved	out of focus
t18	10	0	0	0	fish at the bottom of the tank	out of focus
t18	10	1	0	0	fish at the bottom of the tank	out of focus
t18	10	2	0	0	fish at the bottom of the tank	out of focus
t18	10	3	0	0	fish at the bottom of the tank	out of focus
t18	10	4	0	0	fish at the bottom of the tank	out of focus
t18	10	5	0	0	fish at the bottom of the tank	out of focus
t18	10	6	0	0	fish at the bottom of the tank	out of focus
t18	10	7	0	0	fish at the bottom of the tank	out of focus
t18	10	8	0	0	fish at the bottom of the tank	out of focus
t18	10	9	0	0	fish at the bottom of the tank	out of focus
t18	10	10	0	0	fish at the bottom of the tank	out of focus
t18	10	11	0	0	fish at the bottom of the tank	out of focus
t18	10	12	0	0	fish at the bottom of the tank	out of focus
t18	10	13	0	0	fish at the bottom of the tank	out of focus
t18	10	14	0	0	fish at the bottom of the tank	out of focus
t18	10	15	0	0	fish at the bottom of the tank	out of focus
t18	10	16	0	0	fish at the bottom of the tank	out of focus
t18	10	17	0	0	fish at the bottom of the tank	out of focus
t18	10	18	0	0	fish at the bottom of the tank	out of focus
t18	11	0	0	0	fish at the bottom of the tank	out of focus
t18	11	1	0	0	fish at the bottom of the tank	out of focus
t18	11	2	0	0	fish at the bottom of the tank	out of focus
t18	11	3	0	0	fish at the bottom of the tank	out of focus
t18	11	4	0	0	fish at the bottom of the tank	out of focus
t18	11	5	0	0	fish at the bottom of the tank	out of focus
t18	11	6	0	0	fish at the bottom of the tank	out of focus
t18	11	7	0	0	fish at the bottom of the tank	out of focus
t18	11	8	0	0	fish at the bottom of the tank	out of focus
t18	11	9	0	0	fish at the bottom of the tank	out of focus
t18	11	10	0	0	fish at the bottom of the tank	out of focus
t18	11	11	0	0	fish at the bottom of the tank	out of focus
t18	11	12	0	0	fish at the bottom of the tank	out of focus
t18	11	13	0	0	fish at the bottom of the tank	out of focus
t18	11	14	0	0	fish at the bottom of the tank	out of focus
t18	11	15	0	0	fish at the bottom of the tank	out of focus
t18	11	16	0	0	fish at the bottom of the tank	out of focus
t18	11	17	0	0	fish at the bottom of the tank	out of focus
t18	11	18	0	0	fish at the bottom of the tank	out of focus
t18	12	0	0	0	fish at the bottom of the tank	out of focus
t18	12	1	0	0	fish at the bottom of the tank	out of focus
t18	12	2	0	0	fish at the bottom of the tank	out of focus
t18	12	3	0	0	fish at the bottom of the tank	out of focus
t18	12	4	0	0	fish at the bottom of the tank	out of focus
t18	12	5	0	0	fish at the bottom of the tank	out of focus
t18	12	6	0	0	fish at the bottom of the tank	out of focus
t18	12	7	0	0	fish at the bottom of the tank	out of focus
t18	12	8	0	0	fish at the bottom of the tank	out of focus
t18	12	9	0	0	fish at the bottom of the tank	out of focus
t18	12	10	0	0	fish at the bottom of the tank	out of focus
t18	12	11	0	0	fish at the bottom of the tank	out of focus
t18	12	12	0	0	fish at the bottom of the tank	out of focus
t18	12	13	0	0	fish at the bottom of the tank	out of focus
t18	12	14	0	0	fish at the bottom of the tank	out of focus
t18	12	15	0	0	fish at the bottom of the tank	out of focus
t18	12	16	0	0	fish at the bottom of the tank	out of focus
t18	12	17	0	0	fish at the bottom of the tank	out of focus
t18	12	18	0	0	fish at the bottom of the tank	out of focus
t18	13	0	0	0	fish at the bottom of the tank	out of focus
t18	13	1	0	0	fish at the bottom of the tank	out of focus
t18	13	2	0	0	fish at the bottom of the tank	out of focus
t18	13	3	0	0	fish at the bottom of the tank	out of focus
t18	13	4	0	0	fish at the bottom of the tank	out of focus
t18	13	5	0	0	fish at the bottom of the tank	out of focus
t18	13	6	0	0	fish at the bottom of the tank	out of focus
t18	13	7	0	0	fish at the bottom of the tank	out of focus
t18	13	8	0	0	fish at the bottom of the tank	out of focus
t18	13	9	0	0	fish at the bottom of the tank	out of focus
t18	13	10	0	0	fish at the bottom of the tank	out of focus
t18	13	11	0	0	fish at the bottom of the tank	out of focus
t18	13	12	0	0	fish at the bottom of the tank	out of focus
t18	13	13	0	0	fish at the bottom of the tank	out of focus
t18	13	14	0	0	fish at the bottom of the tank	out of focus
t18	13	15	0	0	fish at the bottom of the tank	out of focus
t18	13	16	0	0	fish at the bottom of the tank	out of focus
t18	13	17	0	0	fish at the bottom of the tank	out of focus
t18	13	18	0	0	fish at the bottom of the tank	out of focus
t18	14	0	0	0	fish at the bottom of the tank. Not moved	out of focus
t18	14	1	0	0	fish at the bottom of the tank. Not moved	out of focus
t18	14	2	0	0	fish at the bottom of the tank. Not moved	out of focus
t18	14	3	0	0	fish at the bottom of the tank. Not moved	out of focus
t18	14	4	0	0	fish at the bottom of the tank. Not moved	out of focus
t18	14	5	0	0	fish at the bottom of the tank. Not moved	out of focus
t18	14	6	0	0	fish at the bottom of the tank. Not moved	out of focus
t18	14	7	0	0	fish at the bottom of the tank. Not moved	out of focus
t18	14	8	0	0	fish at the bottom of the tank. Not moved	out of focus
t18	14	9	0	0	fish at the bottom of the tank. Not moved	out of focus
t18	14	10	0	0	fish at the bottom of the tank. Not moved	out of focus
t18	14	11	0	0	fish at the bottom of the tank. Not moved	out of focus
t18	14	12	0	0	fish at the bottom of the tank. Not moved	out of focus
t18	14	13	0	0	fish at the bottom of the tank. Not moved	out of focus
t18	14	14	0	0	fish at the bottom of the tank. Not moved	out of focus
t18	14	15	0	0	fish at the bottom of the tank. Not moved	out of focus
t18	14	16	0	0	fish at the bottom of the tank. Not moved	out of focus
t18	14	17	0	0	fish at the bottom of the tank. Not moved	out of focus
t18	14	18	0	0	fish at the bottom of the tank. Not moved	out of focus
t18	15	0	0	0		out of focus
t18	15	1	0	0		out of focus
t18	15	2	0	0		out of focus
t18	15	3	0	0		out of focus
t18	15	4	0	0	fish at the bottom of the tank	out of focus
t18	15	5	0	0	fish at the bottom of the tank	out of focus
t18	15	6	0	0	fish at the bottom of the tank	out of focus
t18	15	7	0	0	fish at the bottom of the tank	out of focus
t18	15	8	0	0	fish at the bottom of the tank	out of focus
t18	15	9	0	0	fish at the bottom of the tank	out of focus
t18	15	10	0	0	fish at the bottom of the tank	out of focus
t18	15	11	0	0	fish at the bottom of the tank	out of focus
t18	15	12	0	0	fish at the bottom of the tank	out of focus
t18	15	13	0	0	fish at the bottom of the tank	out of focus
t18	15	14	0	0	fish at the bottom of the tank	out of focus
t18	15	15	0	0	fish at the bottom of the tank	out of focus
t18	15	16	0	0	fish at the bottom of the tank	out of focus
t18	15	17	0	0	fish at the bottom of the tank	out of focus
t18	15	18	0	0	fish at the bottom of the tank	out of focus
t18	16	0	0	0	fish at the bottom of the tank	out of focus
t18	16	1	0	0	fish at the bottom of the tank	out of focus
t18	16	2	0	0	fish at the bottom of the tank	out of focus
t18	16	3	0	0	fish at the bottom of the tank	out of focus
t18	16	4	0	0	fish at the bottom of the tank	out of focus
t18	16	5	0	0	fish at the bottom of the tank	out of focus
t18	16	6	0	0	fish at the bottom of the tank	out of focus
t18	16	7	0	0	fish at the bottom of the tank	out of focus
t18	16	8	0	0	fish at the bottom of the tank	out of focus
t18	16	9	0	0	fish at the bottom of the tank	out of focus
t18	16	10	0	0	fish at the bottom of the tank	out of focus
t18	16	11	0	0	fish at the bottom of the tank	out of focus
t18	16	12	0	0	fish at the bottom of the tank	out of focus
t18	16	13	0	0	fish at the bottom of the tank	out of focus
t18	16	14	0	0	fish at the bottom of the tank	out of focus
t18	16	15	0	0	fish at the bottom of the tank	out of focus
t18	16	16	0	0	fish at the bottom of the tank	out of focus
t18	16	17	0	0	fish at the bottom of the tank	out of focus
t18	16	18	0	0	fish at the bottom of the tank	out of focus
t18	17	0	0	0	fish at the bottom of the tank	out of focus
t18	17	1	0	0	fish at the bottom of the tank	out of focus
t18	17	2	0	0	fish at the bottom of the tank	out of focus
t18	17	3	0	0	fish at the bottom of the tank	out of focus
t18	17	4	0	0	fish at the bottom of the tank	out of focus
t18	17	5	0	0	fish at the bottom of the tank	out of focus
t18	17	6	0	0	fish at the bottom of the tank	out of focus
t18	17	7	0	0	fish at the bottom of the tank	out of focus
t18	17	8	0	0	fish at the bottom of the tank	out of focus
t18	17	9	0	0	fish at the bottom of the tank	out of focus
t18	17	10	0	0	fish at the bottom of the tank	out of focus
t18	17	11	0	0	fish at the bottom of the tank	out of focus
t18	17	12	0	0	fish at the bottom of the tank	out of focus
t18	17	13	0	0	fish at the bottom of the tank	out of focus
t18	17	14	0	0	fish at the bottom of the tank	out of focus
t18	17	15	0	0	fish at the bottom of the tank	out of focus
t18	17	16	0	0	fish at the bottom of the tank	out of focus
t18	17	17	0	0	fish at the bottom of the tank	out of focus
t18	17	18	0	0	fish at the bottom of the tank	out of focus
t18	18	0	0	0	fish at the bottom of the tank	out of focus
t18	18	1	0	0	fish at the bottom of the tank	out of focus
t18	18	2	0	0	fish at the bottom of the tank	out of focus
t18	18	3	0	0	fish at the bottom of the tank	out of focus
t18	18	4	0	0	fish at the bottom of the tank	out of focus
t18	18	5	0	0	fish at the bottom of the tank	out of focus
t18	18	6	0	0	fish at the bottom of the tank	out of focus
t18	18	7	0	0	fish at the bottom of the tank	out of focus
t18	18	8	0	0	fish at the bottom of the tank	out of focus
t18	18	9	0	0	fish at the bottom of the tank	out of focus
t18	18	10	0	0	fish at the bottom of the tank	out of focus
t18	18	11	0	0	fish at the bottom of the tank	out of focus
t18	18	12	0	0	fish at the bottom of the tank	out of focus
t18	18	13	0	0	fish at the bottom of the tank	out of focus
t18	18	14	0	0	fish at the bottom of the tank	out of focus
t18	18	15	0	0	fish at the bottom of the tank	out of focus
t18	18	16	0	0	fish at the bottom of the tank	out of focus
t18	18	17	0	0	fish at the bottom of the tank	out of focus
t18	18	18	0	0	fish at the bottom of the tank	out of focus
t18	19	0	0	0	fish at the bottom of the tank	out of focus
t18	19	1	0	0	fish at the bottom of the tank	out of focus
t18	19	2	0	0	fish at the bottom of the tank	out of focus
t18	19	3	0	0	fish at the bottom of the tank	out of focus
t18	19	4	0	0	fish at the bottom of the tank	out of focus
t18	19	5	0	0	fish at the bottom of the tank	out of focus
t18	19	6	0	0	fish at the bottom of the tank	out of focus
t18	19	7	0	0	fish at the bottom of the tank	out of focus
t18	19	8	0	0	fish at the bottom of the tank	out of focus
t18	19	9	0	0	fish at the bottom of the tank	out of focus
t18	19	10	0	0	fish at the bottom of the tank	out of focus
t18	19	11	0	0	fish at the bottom of the tank	out of focus
t18	19	12	0	0	fish at the bottom of the tank	out of focus
t18	19	13	0	0	fish at the bottom of the tank	out of focus
t18	19	14	0	0	fish at the bottom of the tank	out of focus
t18	19	15	0	0	fish at the bottom of the tank	out of focus
t18	19	16	0	0	fish at the bottom of the tank	out of focus
t18	19	17	0	0	fish at the bottom of the tank	out of focus
t18	19	18	0	0	fish at the bottom of the tank	out of focus
t18	20	0	0	0	fish at the bottom of the tank	out of focus
t18	20	1	0	0	fish at the bottom of the tank	out of focus
t18	20	2	0	0	fish at the bottom of the tank	out of focus
t18	20	3	0	0	fish at the bottom of the tank	out of focus
t18	20	4	0	0	fish at the bottom of the tank	out of focus
t18	20	5	0	0	fish at the bottom of the tank	out of focus
t18	20	6	0	0	fish at the bottom of the tank	out of focus
t18	20	7	0	0	fish at the bottom of the tank	out of focus
t18	20	8	0	0	fish at the bottom of the tank	out of focus
t18	20	9	0	0	fish at the bottom of the tank	out of focus
t18	20	10	0	0	fish at the bottom of the tank	out of focus
t18	20	11	0	0	fish at the bottom of the tank	out of focus
t18	20	12	0	0	fish at the bottom of the tank	out of focus
t18	20	13	0	0	fish at the bottom of the tank	out of focus
t18	20	14	0	0	fish at the bottom of the tank	out of focus
t18	20	15	0	0	fish at the bottom of the tank	out of focus
t18	20	16	0	0	fish at the bottom of the tank	out of focus
t18	20	17	0	0	fish at the bottom of the tank	out of focus
t18	20	18	0	0	fish at the bottom of the tank	out of focus
t18	21	0	0	0	fish at the bottom of the tank	out of focus
t18	21	1	0	0	fish at the bottom of the tank	out of focus
t18	21	2	0	0	fish at the bottom of the tank	out of focus
t18	21	3	0	0	fish at the bottom of the tank	out of focus
t18	21	4	0	0	fish at the bottom of the tank	out of focus
t18	21	5	0	0	fish at the bottom of the tank	out of focus
t18	21	6	0	0	fish at the bottom of the tank	out of focus
t18	21	7	0	0	fish at the bottom of the tank	out of focus
t18	21	8	0	0	fish at the bottom of the tank	out of focus
t18	21	9	0	0	fish at the bottom of the tank	out of focus
t18	21	10	0	0	fish at the bottom of the tank	out of focus
t18	21	11	0	0	fish at the bottom of the tank	out of focus
t18	21	12	0	0	fish at the bottom of the tank	out of focus
t18	21	13	0	0	fish at the bottom of the tank	out of focus
t18	21	14	0	0	fish at the bottom of the tank	out of focus
t18	21	15	0	0	fish at the bottom of the tank	out of focus
t18	21	16	0	0	fish at the bottom of the tank	out of focus
t18	21	17	0	0	fish at the bottom of the tank	out of focus
t18	21	18	0	0	fish at the bottom of the tank	out of focus

## Sheet: Fish_8
Animal ID (WT)	Video #	Second #	Animal Moving Upward? (any displacement toward the light's direction, inferred from the position the next second) (1 = yes; 0 = no)	Animal at Surface? (1 = yes; 0 = no)	Behavior Notes	Video Quality Notes	Other notes
t8	0	0	0	0	fish at the bottom of the tank	out of focus, video very dark	can't validate food drop
t8	0	1	0	0	fish at the bottom of the tank	out of focus, video very dark	can't validate food drop
t8	0	2	0	0	fish at the bottom of the tank	out of focus, video very dark	can't validate food drop
t8	0	3	0	0	fish at the bottom of the tank	out of focus, video very dark	can't validate food drop
t8	0	4	0	0	fish at the bottom of the tank	out of focus, video very dark	can't validate food drop
t8	0	5	0	0	fish at the bottom of the tank	out of focus, video very dark	can't validate food drop
t8	0	6	0	0	fish at the bottom of the tank	out of focus, video very dark	can't validate food drop
t8	0	7	0	0	No food drop. fish at the bottom of the tank	out of focus, video very dark	can't validate food drop
t8	0	8	0	0	fish at the bottom of the tank	out of focus, video very dark	can't validate food drop
t8	0	9	0	0	fish at the bottom of the tank	out of focus, video very dark	can't validate food drop
t8	0	10	0	0	fish at the bottom of the tank	out of focus, video very dark	can't validate food drop
t8	0	11	0	0	fish at the bottom of the tank	out of focus, video very dark	can't validate food drop
t8	0	12	0	0	fish at the bottom of the tank	out of focus, video very dark	can't validate food drop
t8	0	13	0	0	fish at the bottom of the tank	out of focus, video very dark	can't validate food drop
t8	0	14	0	0	fish at the bottom of the tank	out of focus, video very dark	can't validate food drop
t8	0	15	0	0	fish at the bottom of the tank	out of focus, video very dark	can't validate food drop
t8	0	16	0	0	fish at the bottom of the tank	out of focus, video very dark	can't validate food drop
t8	0	17	0	0	fish at the bottom of the tank	out of focus, video very dark	can't validate food drop
t8	0	18	0	0	fish at the bottom of the tank	out of focus, video very dark	can't validate food drop
t8	1	0	1	0		out of focus, video very dark	can't validate food drop
t8	1	1	1	0		out of focus, video very dark	can't validate food drop
t8	1	2	0	0		out of focus, video very dark	can't validate food drop
t8	1	3	0	0		out of focus, video very dark	can't validate food drop
t8	1	4	0	0		out of focus, video very dark	can't validate food drop
t8	1	5	1	0		out of focus, video very dark	can't validate food drop
t8	1	6	0	0		out of focus, video very dark	can't validate food drop
t8	1	7	0	0	No food drop.	out of focus, video very dark	can't validate food drop
t8	1	8	0	0		out of focus, video very dark	can't validate food drop
t8	1	9	1	0		out of focus, video very dark	can't validate food drop
t8	1	10	1	0		out of focus, video very dark	can't validate food drop
t8	1	11	1	0		out of focus, video very dark	can't validate food drop
t8	1	12	0	1		out of focus, video very dark	can't validate food drop
t8	1	13	0	1		out of focus, video very dark	can't validate food drop
t8	1	14	0	0	rapidly gone down	out of focus, video very dark	can't validate food drop
t8	1	15	0	0		out of focus, video very dark	can't validate food drop
t8	1	16	0	0		out of focus, video very dark	can't validate food drop
t8	1	17	0	0		out of focus, video very dark	can't validate food drop
t8	1	18	0	0		out of focus, video very dark	can't validate food drop
t8	2	0	1	0		out of focus, video very dark	can't validate food drop
t8	2	1	1	0		out of focus, video very dark	can't validate food drop
t8	2	2	0	0		out of focus, video very dark	can't validate food drop
t8	2	3	1	0		out of focus, video very dark	can't validate food drop
t8	2	4	0	0		out of focus, video very dark	can't validate food drop
t8	2	5	0	0		out of focus, video very dark	can't validate food drop
t8	2	6	0	0		out of focus, video very dark	can't validate food drop
t8	2	7	1	0	No food drop.	out of focus, video very dark	can't validate food drop
t8	2	8	1	0		out of focus, video very dark	can't validate food drop
t8	2	9	0	0	close to surface?	out of focus, video very dark	can't validate food drop
t8	2	10	0	0	close to surface?	out of focus, video very dark	can't validate food drop
t8	2	11	0	0		out of focus, video very dark	can't validate food drop
t8	2	12	0	0		out of focus, video very dark	can't validate food drop
t8	2	13	0	0		out of focus, video very dark	can't validate food drop
t8	2	14	0	0		out of focus, video very dark	can't validate food drop
t8	2	15	0	0		out of focus, video very dark	can't validate food drop
t8	2	16	0	0		out of focus, video very dark	can't validate food drop
t8	2	17	0	0		out of focus, video very dark	can't validate food drop
t8	2	18	0	0		out of focus, video very dark	can't validate food drop
t8	3	0	0	0		out of focus, video very dark	can't validate food drop
t8	3	1	0	0		out of focus, video very dark	can't validate food drop
t8	3	2	0	0		out of focus, video very dark	can't validate food drop
t8	3	3	0	0		out of focus, video very dark	can't validate food drop
t8	3	4	1	0		out of focus, video very dark	can't validate food drop
t8	3	5	0	0		out of focus, video very dark	can't validate food drop
t8	3	6	0	0		out of focus, video very dark	can't validate food drop
t8	3	7	0	0	No food drop.	out of focus, video very dark	can't validate food drop
t8	3	8	0	0		out of focus, video very dark	can't validate food drop
t8	3	9	0	0		out of focus, video very dark	can't validate food drop
t8	3	10	1	0		out of focus, video very dark	can't validate food drop
t8	3	11	1	0		out of focus, video very dark	can't validate food drop
t8	3	12	0	1		out of focus, video very dark	can't validate food drop
t8	3	13	0	0	back of the tank	out of focus, video very dark	can't validate food drop
t8	3	14	0	0		out of focus, video very dark	can't validate food drop
t8	3	15	0	0		out of focus, video very dark	can't validate food drop
t8	3	16	1	0		out of focus, video very dark	can't validate food drop
t8	3	17	1	0		out of focus, video very dark	can't validate food drop
t8	3	18	0	0		out of focus, video very dark	can't validate food drop
t8	4	0	0	0		out of focus, video very dark	can't validate food drop
t8	4	1	0	0		out of focus, video very dark	can't validate food drop
t8	4	2	0	0		out of focus, video very dark	can't validate food drop
t8	4	3	1	0		out of focus, video very dark	can't validate food drop
t8	4	4	1	0		out of focus, video very dark	can't validate food drop
t8	4	5	1	0		out of focus, video very dark	can't validate food drop
t8	4	6	1	0		out of focus, video very dark	can't validate food drop
t8	4	7	1	0	No food drop.	out of focus, video very dark	can't validate food drop
t8	4	8	0	1		out of focus, video very dark	can't validate food drop
t8	4	9	0	1	eating?	out of focus, video very dark	can't validate food drop
t8	4	10	0	1	eating?	out of focus, video very dark	can't validate food drop
t8	4	11	0	1	eating?	out of focus, video very dark	can't validate food drop
t8	4	12	0	1	eating?	out of focus, video very dark	can't validate food drop
t8	4	13	0	1	eating?	out of focus, video very dark	can't validate food drop
t8	4	14	0	0		out of focus, video very dark	can't validate food drop
t8	4	15	0	0		out of focus, video very dark	can't validate food drop
t8	4	16	0	0		out of focus, video very dark	can't validate food drop
t8	4	17	1	0		out of focus, video very dark	can't validate food drop
t8	4	18	1	0		out of focus, video very dark	can't validate food drop
t8	5	0	0	0		out of focus, video very dark	can't validate food drop
t8	5	1	0	0		out of focus, video very dark	can't validate food drop
t8	5	2	0	0		out of focus, video very dark	can't validate food drop
t8	5	3	1	0		out of focus, video very dark	can't validate food drop
t8	5	4	1	0		out of focus, video very dark	can't validate food drop
t8	5	5	1	0		out of focus, video very dark	can't validate food drop
t8	5	6	1	0		out of focus, video very dark	can't validate food drop
t8	5	7	1	0	No food drop.	out of focus, video very dark	can't validate food drop
t8	5	8	0	0		out of focus, video very dark	can't validate food drop
t8	5	9	1	0		out of focus, video very dark	can't validate food drop
t8	5	10	0	0		out of focus, video very dark	can't validate food drop
t8	5	11	1	0		out of focus, video very dark	can't validate food drop
t8	5	12	1	0		out of focus, video very dark	can't validate food drop
t8	5	13	1	0		out of focus, video very dark	can't validate food drop
t8	5	14	1	0		out of focus, video very dark	can't validate food drop
t8	5	15	1	0		out of focus, video very dark	can't validate food drop
t8	5	16	1	0		out of focus, video very dark	can't validate food drop
t8	5	17	0	1	back of the tank	out of focus, video very dark	can't validate food drop
t8	5	18	0	0		out of focus, video very dark	can't validate food drop
t8	6	0	0	0	fish at the bottom of the tank	out of focus, video very dark	can't validate food drop
t8	6	1	0	0	fish at the bottom of the tank	out of focus, video very dark	can't validate food drop
t8	6	2	0	0	fish at the bottom of the tank	out of focus, video very dark	can't validate food drop
t8	6	3	0	0	fish at the bottom of the tank	out of focus, video very dark	can't validate food drop
t8	6	4	0	0	fish at the bottom of the tank	out of focus, video very dark	can't validate food drop
t8	6	5	0	0	fish at the bottom of the tank	out of focus, video very dark	can't validate food drop
t8	6	6	0	0	fish at the bottom of the tank	out of focus, video very dark	can't validate food drop
t8	6	7	0	0	No food drop. fish at the bottom of the tank	out of focus, video very dark	can't validate food drop
t8	6	8	0	0	fish at the bottom of the tank	out of focus, video very dark	can't validate food drop
t8	6	9	0	0	fish at the bottom of the tank	out of focus, video very dark	can't validate food drop
t8	6	10	0	0	fish at the bottom of the tank	out of focus, video very dark	can't validate food drop
t8	6	11	0	0	fish at the bottom of the tank	out of focus, video very dark	can't validate food drop
t8	6	12	0	0	fish at the bottom of the tank	out of focus, video very dark	can't validate food drop
t8	6	13	0	0	fish at the bottom of the tank	out of focus, video very dark	can't validate food drop
t8	6	14	0	0	fish at the bottom of the tank	out of focus, video very dark	can't validate food drop
t8	6	15	0	0	fish at the bottom of the tank	out of focus, video very dark	can't validate food drop
t8	6	16	0	0	fish at the bottom of the tank	out of focus, video very dark	can't validate food drop
t8	6	17	0	0	fish at the bottom of the tank	out of focus, video very dark	can't validate food drop
t8	6	18	0	0	fish at the bottom of the tank	out of focus, video very dark	can't validate food drop
t8	7	0	0	0	fish at the bottom of the tank	out of focus, video very dark	can't validate food drop
t8	7	1	0	0	fish at the bottom of the tank	out of focus, video very dark	can't validate food drop
t8	7	2	0	0	fish at the bottom of the tank	out of focus, video very dark	can't validate food drop
t8	7	3	0	0	fish at the bottom of the tank	out of focus, video very dark	can't validate food drop
t8	7	4	0	0	fish at the bottom of the tank	out of focus, video very dark	can't validate food drop
t8	7	5	0	0	fish at the bottom of the tank	out of focus, video very dark	can't validate food drop
t8	7	6	0	0	fish at the bottom of the tank	out of focus, video very dark	can't validate food drop
t8	7	7	0	0	No food drop. fish at the bottom of the tank	out of focus, video very dark	can't validate food drop
t8	7	8	0	0	fish at the bottom of the tank	out of focus, video very dark	can't validate food drop
t8	7	9	0	0	fish at the bottom of the tank	out of focus, video very dark	can't validate food drop
t8	7	10	0	0	fish at the bottom of the tank	out of focus, video very dark	can't validate food drop
t8	7	11	0	0	fish at the bottom of the tank	out of focus, video very dark	can't validate food drop
t8	7	12	0	0	fish at the bottom of the tank	out of focus, video very dark	can't validate food drop
t8	7	13	0	0	fish at the bottom of the tank	out of focus, video very dark	can't validate food drop
t8	7	14	0	0	fish at the bottom of the tank	out of focus, video very dark	can't validate food drop
t8	7	15	0	0	fish at the bottom of the tank	out of focus, video very dark	can't validate food drop
t8	7	16	0	0	fish at the bottom of the tank	out of focus, video very dark	can't validate food drop
t8	7	17	0	0	fish at the bottom of the tank	out of focus, video very dark	can't validate food drop
t8	7	18	0	0	fish at the bottom of the tank	out of focus, video very dark	can't validate food drop
t8	8	0	0	0		out of focus, video very dark	can't validate food drop
t8	8	1	1	0		out of focus, video very dark	can't validate food drop
t8	8	2	1	0		out of focus, video very dark	can't validate food drop
t8	8	3	0	0		out of focus, video very dark	can't validate food drop
t8	8	4	0	0		out of focus, video very dark	can't validate food drop
t8	8	5	0	0		out of focus, video very dark	can't validate food drop
t8	8	6	0	0		out of focus, video very dark	can't validate food drop
t8	8	7	1	0	No food drop.	out of focus, video very dark	can't validate food drop
t8	8	8	1	0		out of focus, video very dark	can't validate food drop
t8	8	9	1	0		out of focus, video very dark	can't validate food drop
t8	8	10	0	0		out of focus, video very dark	can't validate food drop
t8	8	11	0	0		out of focus, video very dark	can't validate food drop
t8	8	12	1	0		out of focus, video very dark	can't validate food drop
t8	8	13	0	0		out of focus, video very dark	can't validate food drop
t8	8	14	0	0		out of focus, video very dark	can't validate food drop
t8	8	15	0	0		out of focus, video very dark	can't validate food drop
t8	8	16	0	0		out of focus, video very dark	can't validate food drop
t8	8	17	1	0		out of focus, video very dark	can't validate food drop
t8	8	18	1	0		out of focus, video very dark	can't validate food drop
t8	9	0	0	0	fish at the bottom of the tank	out of focus, video very dark	can't validate food drop
t8	9	1	0	0	fish at the bottom of the tank	out of focus, video very dark	can't validate food drop
t8	9	2	0	0	fish at the bottom of the tank	out of focus, video very dark	can't validate food drop
t8	9	3	0	0	fish at the bottom of the tank	out of focus, video very dark	can't validate food drop
t8	9	4	0	0	fish at the bottom of the tank	out of focus, video very dark	can't validate food drop
t8	9	5	0	0	fish at the bottom of the tank	out of focus, video very dark	can't validate food drop
t8	9	6	0	0	fish at the bottom of the tank	out of focus, video very dark	can't validate food drop
t8	9	7	0	0	No food drop. fish at the bottom of the tank	out of focus, video very dark	can't validate food drop
t8	9	8	0	0	fish at the bottom of the tank	out of focus, video very dark	can't validate food drop
t8	9	9	0	0	fish at the bottom of the tank	out of focus, video very dark	can't validate food drop
t8	9	10	0	0	fish at the bottom of the tank	out of focus, video very dark	can't validate food drop
t8	9	11	0	0	fish at the bottom of the tank	out of focus, video very dark	can't validate food drop
t8	9	12	0	0	fish at the bottom of the tank	out of focus, video very dark	can't validate food drop
t8	9	13	0	0	fish at the bottom of the tank	out of focus, video very dark	can't validate food drop
t8	9	14	0	0	fish at the bottom of the tank	out of focus, video very dark	can't validate food drop
t8	9	15	0	0	fish at the bottom of the tank	out of focus, video very dark	can't validate food drop
t8	9	16	0	0	fish at the bottom of the tank	out of focus, video very dark	can't validate food drop
t8	9	17	0	0	fish at the bottom of the tank	out of focus, video very dark	can't validate food drop
t8	9	18	0	0	fish at the bottom of the tank	out of focus, video very dark	can't validate food drop
t8	10	0	1	0		out of focus, video very dark	can't validate food drop
t8	10	1	1	0		out of focus, video very dark	can't validate food drop
t8	10	2	0	0		out of focus, video very dark	can't validate food drop
t8	10	3	0	0		out of focus, video very dark	can't validate food drop
t8	10	4	0	0		out of focus, video very dark	can't validate food drop
t8	10	5	1	0		out of focus, video very dark	can't validate food drop
t8	10	6	1	0		out of focus, video very dark	can't validate food drop
t8	10	7	0	0	No food drop.	out of focus, video very dark	can't validate food drop
t8	10	8	0	0		out of focus, video very dark	can't validate food drop
t8	10	9	0	0		out of focus, video very dark	can't validate food drop
t8	10	10	1	0		out of focus, video very dark	can't validate food drop
t8	10	11	0	0		out of focus, video very dark	can't validate food drop
t8	10	12	1	0		out of focus, video very dark	can't validate food drop
t8	10	13	0	0		out of focus, video very dark	can't validate food drop
t8	10	14	0	0		out of focus, video very dark	can't validate food drop
t8	10	15	0	0		out of focus, video very dark	can't validate food drop
t8	10	16	1	0		out of focus, video very dark	can't validate food drop
t8	10	17	1	0		out of focus, video very dark	can't validate food drop
t8	10	18	0	1		out of focus, video very dark	can't validate food drop
t8	11	0	0	0		out of focus, video very dark	can't validate food drop
t8	11	1	0	0		out of focus, video very dark	can't validate food drop
t8	11	2	0	0		out of focus, video very dark	can't validate food drop
t8	11	3	0	0		out of focus, video very dark	can't validate food drop
t8	11	4	0	0		out of focus, video very dark	can't validate food drop
t8	11	5	0	0		out of focus, video very dark	can't validate food drop
t8	11	6	0	0		out of focus, video very dark	can't validate food drop
t8	11	7	1	0	No food drop.	out of focus, video very dark	can't validate food drop
t8	11	8	0	0		out of focus, video very dark	can't validate food drop
t8	11	9	1	0		out of focus, video very dark	can't validate food drop
t8	11	10	0	0		out of focus, video very dark	can't validate food drop
t8	11	11	1	0		out of focus, video very dark	can't validate food drop
t8	11	12	1	0		out of focus, video very dark	can't validate food drop
t8	11	13	0	0		out of focus, video very dark	can't validate food drop
t8	11	14	1	0		out of focus, video very dark	can't validate food drop
t8	11	15	0	0		out of focus, video very dark	can't validate food drop
t8	11	16	0	0		out of focus, video very dark	can't validate food drop
t8	11	17	0	0		out of focus, video very dark	can't validate food drop
t8	11	18	0	0		out of focus, video very dark	can't validate food drop
t8	12	0	0	0		out of focus, video very dark	can't validate food drop
t8	12	1	0	0		out of focus, video very dark	can't validate food drop
t8	12	2	0	0		out of focus, video very dark	can't validate food drop
t8	12	3	0	0		out of focus, video very dark	can't validate food drop
t8	12	4	0	0		out of focus, video very dark	can't validate food drop
t8	12	5	0	0		out of focus, video very dark	can't validate food drop
t8	12	6	1	0		out of focus, video very dark	can't validate food drop
t8	12	7	1	0	No food drop.	out of focus, video very dark	can't validate food drop
t8	12	8	1	0		out of focus, video very dark	can't validate food drop
t8	12	9	1	0		out of focus, video very dark	can't validate food drop
t8	12	10	0	0		out of focus, video very dark	can't validate food drop
t8	12	11	0	0		out of focus, video very dark	can't validate food drop
t8	12	12	0	0		out of focus, video very dark	can't validate food drop
t8	12	13	0	0		out of focus, video very dark	can't validate food drop
t8	12	14	1	0		out of focus, video very dark	can't validate food drop
t8	12	15	1	0		out of focus, video very dark	can't validate food drop
t8	12	16	0	0		out of focus, video very dark	can't validate food drop
t8	12	17	0	0		out of focus, video very dark	can't validate food drop
t8	12	18	0	0		out of focus, video very dark	can't validate food drop
t8	13	0	0	0		out of focus, video very dark	can't validate food drop
t8	13	1	0	0		out of focus, video very dark	can't validate food drop
t8	13	2	0	0		out of focus, video very dark	can't validate food drop
t8	13	3	1	0		out of focus, video very dark	can't validate food drop
t8	13	4	1	0		out of focus, video very dark	can't validate food drop
t8	13	5	1	0		out of focus, video very dark	can't validate food drop
t8	13	6	0	0		out of focus, video very dark	can't validate food drop
t8	13	7	0	0	No food drop.	out of focus, video very dark	can't validate food drop
t8	13	8	0	0		out of focus, video very dark	can't validate food drop
t8	13	9	0	0		out of focus, video very dark	can't validate food drop
t8	13	10	0	0		out of focus, video very dark	can't validate food drop
t8	13	11	0	0		out of focus, video very dark	can't validate food drop
t8	13	12	0	0		out of focus, video very dark	can't validate food drop
t8	13	13	1	0		out of focus, video very dark	can't validate food drop
t8	13	14	1	0		out of focus, video very dark	can't validate food drop
t8	13	15	0	0		out of focus, video very dark	can't validate food drop
t8	13	16	1	0		out of focus, video very dark	can't validate food drop
t8	13	17	1	0		out of focus, video very dark	can't validate food drop
t8	13	18	1	0	ultimately reaches the surface	out of focus, video very dark	can't validate food drop
t8	14	0	0	0	fish at the bottom of the tank	out of focus, video very dark	can't validate food drop
t8	14	1	0	0	fish at the bottom of the tank	out of focus, video very dark	can't validate food drop
t8	14	2	0	0	fish at the bottom of the tank	out of focus, video very dark	can't validate food drop
t8	14	3	0	0	fish at the bottom of the tank	out of focus, video very dark	can't validate food drop
t8	14	4	0	0	fish at the bottom of the tank	out of focus, video very dark	can't validate food drop
t8	14	5	0	0	fish at the bottom of the tank	out of focus, video very dark	can't validate food drop
t8	14	6	0	0	fish at the bottom of the tank	out of focus, video very dark	can't validate food drop
t8	14	7	0	0	No food drop. fish at the bottom of the tank	out of focus, video very dark	can't validate food drop
t8	14	8	0	0	fish at the bottom of the tank	out of focus, video very dark	can't validate food drop
t8	14	9	0	0	fish at the bottom of the tank	out of focus, video very dark	can't validate food drop
t8	14	10	0	0	fish at the bottom of the tank	out of focus, video very dark	can't validate food drop
t8	14	11	0	0	fish at the bottom of the tank	out of focus, video very dark	can't validate food drop
t8	14	12	0	0	fish at the bottom of the tank	out of focus, video very dark	can't validate food drop
t8	14	13	0	0	fish at the bottom of the tank	out of focus, video very dark	can't validate food drop
t8	14	14	0	0	fish at the bottom of the tank	out of focus, video very dark	can't validate food drop
t8	14	15	0	0	fish at the bottom of the tank	out of focus, video very dark	can't validate food drop
t8	14	16	0	0	fish at the bottom of the tank	out of focus, video very dark	can't validate food drop
t8	14	17	0	0	fish at the bottom of the tank	out of focus, video very dark	can't validate food drop
t8	14	18	0	0	fish at the bottom of the tank	out of focus, video very dark	can't validate food drop
t8	15	0	1	0		out of focus, video very dark	can't validate food drop
t8	15	1	1	0		out of focus, video very dark	can't validate food drop
t8	15	2	0	0		out of focus, video very dark	can't validate food drop
t8	15	3	0	0		out of focus, video very dark	can't validate food drop
t8	15	4	1	0		out of focus, video very dark	can't validate food drop
t8	15	5	1	0		out of focus, video very dark	can't validate food drop
t8	15	6	0	0	within 1 cm from surface. In the back of the tank	out of focus, video very dark	can't validate food drop
t8	15	7	0	0	No food drop.	out of focus, video very dark	can't validate food drop
t8	15	8	0	0		out of focus, video very dark	can't validate food drop
t8	15	9	0	0		out of focus, video very dark	can't validate food drop
t8	15	10	0	0		out of focus, video very dark	can't validate food drop
t8	15	11	0	0		out of focus, video very dark	can't validate food drop
t8	15	12	0	0		out of focus, video very dark	can't validate food drop
t8	15	13	0	0		out of focus, video very dark	can't validate food drop
t8	15	14	0	0		out of focus, video very dark	can't validate food drop
t8	15	15	1	0		out of focus, video very dark	can't validate food drop
t8	15	16	0	0		out of focus, video very dark	can't validate food drop
t8	15	17	1	0		out of focus, video very dark	can't validate food drop
t8	15	18	1	0		out of focus, video very dark	can't validate food drop
t8	16	0	0	0		out of focus, video very dark	can't validate food drop
t8	16	1	0	0		out of focus, video very dark	can't validate food drop
t8	16	2	0	0		out of focus, video very dark	can't validate food drop
t8	16	3	0	0		out of focus, video very dark	can't validate food drop
t8	16	4	0	0		out of focus, video very dark	can't validate food drop
t8	16	5	0	0		out of focus, video very dark	can't validate food drop
t8	16	6	1	0		out of focus, video very dark	can't validate food drop
t8	16	7	1	0	No food drop.	out of focus, video very dark	can't validate food drop
t8	16	8	1	0		out of focus, video very dark	can't validate food drop
t8	16	9	1	0		out of focus, video very dark	can't validate food drop
t8	16	10	1	0		out of focus, video very dark	can't validate food drop
t8	16	11	1	0		out of focus, video very dark	can't validate food drop
t8	16	12	0	0	within 1 cm from surface	out of focus, video very dark	can't validate food drop
t8	16	13	0	0		out of focus, video very dark	can't validate food drop
t8	16	14	0	0		out of focus, video very dark	can't validate food drop
t8	16	15	0	0		out of focus, video very dark	can't validate food drop
t8	16	16	0	0		out of focus, video very dark	can't validate food drop
t8	16	17	0	0		out of focus, video very dark	can't validate food drop
t8	16	18	0	0		out of focus, video very dark	can't validate food drop
t8	17	0	0	0		out of focus, video very dark	can't validate food drop
t8	17	1	0	0		out of focus, video very dark	can't validate food drop
t8	17	2	0	0		out of focus, video very dark	can't validate food drop
t8	17	3	0	0		out of focus, video very dark	can't validate food drop
t8	17	4	0	0		out of focus, video very dark	can't validate food drop
t8	17	5	0	0		out of focus, video very dark	can't validate food drop
t8	17	6	1	0		out of focus, video very dark	can't validate food drop
t8	17	7	1	0	No food drop.	out of focus, video very dark	can't validate food drop
t8	17	8	1	0		out of focus, video very dark	can't validate food drop
t8	17	9	0	1		out of focus, video very dark	can't validate food drop
t8	17	10	0	1		out of focus, video very dark	can't validate food drop
t8	17	11	0	0		out of focus, video very dark	can't validate food drop
t8	17	12	0	0		out of focus, video very dark	can't validate food drop
t8	17	13	0	0		out of focus, video very dark	can't validate food drop
t8	17	14	0	0		out of focus, video very dark	can't validate food drop
t8	17	15	0	0		out of focus, video very dark	can't validate food drop
t8	17	16	1	0		out of focus, video very dark	can't validate food drop
t8	17	17	0	0		out of focus, video very dark	can't validate food drop
t8	17	18	0	0		out of focus, video very dark	can't validate food drop
t8	18	0	0	1	at surface	out of focus, video very dark	can't validate food drop
t8	18	1	0	1	at surface	out of focus, video very dark	can't validate food drop
t8	18	2	0	1	at surface	out of focus, video very dark	can't validate food drop
t8	18	3	0	1	at surface	out of focus, video very dark	can't validate food drop
t8	18	4	0	1	at surface	out of focus, video very dark	can't validate food drop
t8	18	5	0	1	at surface	out of focus, video very dark	can't validate food drop
t8	18	6	0	1	at surface	out of focus, video very dark	can't validate food drop
t8	18	7	0	1	No food drop. at surface	out of focus, video very dark	can't validate food drop
t8	18	8	0	1	at surface	out of focus, video very dark	can't validate food drop
t8	18	9	0	1	at surface	out of focus, video very dark	can't validate food drop
t8	18	10	0	0		out of focus, video very dark	can't validate food drop
t8	18	11	0	0		out of focus, video very dark	can't validate food drop
t8	18	12	0	0		out of focus, video very dark	can't validate food drop
t8	18	13	0	0		out of focus, video very dark	can't validate food drop
t8	18	14	0	0		out of focus, video very dark	can't validate food drop
t8	18	15	0	0		out of focus, video very dark	can't validate food drop
t8	18	16	0	0		out of focus, video very dark	can't validate food drop
t8	18	17	0	0		out of focus, video very dark	can't validate food drop
t8	18	18	0	0		out of focus, video very dark	can't validate food drop
t8	19	0	0	0	At the bottom quarter of the tank	out of focus, video very dark	can't validate food drop
t8	19	1	0	0	At the bottom quarter of the tank	out of focus, video very dark	can't validate food drop
t8	19	2	0	0	At the bottom quarter of the tank	out of focus, video very dark	can't validate food drop
t8	19	3	0	0	At the bottom quarter of the tank	out of focus, video very dark	can't validate food drop
t8	19	4	0	0	At the bottom quarter of the tank	out of focus, video very dark	can't validate food drop
t8	19	5	0	0	At the bottom quarter of the tank	out of focus, video very dark	can't validate food drop
t8	19	6	0	0	At the bottom quarter of the tank	out of focus, video very dark	can't validate food drop
t8	19	7	0	0	No food drop. At the bottom quarter of the tank	out of focus, video very dark	can't validate food drop
t8	19	8	0	0	At the bottom quarter of the tank	out of focus, video very dark	can't validate food drop
t8	19	9	0	0	At the bottom quarter of the tank	out of focus, video very dark	can't validate food drop
t8	19	10	0	0	At the bottom quarter of the tank	out of focus, video very dark	can't validate food drop
t8	19	11	0	0	At the bottom quarter of the tank	out of focus, video very dark	can't validate food drop
t8	19	12	0	0	At the bottom quarter of the tank	out of focus, video very dark	can't validate food drop
t8	19	13	0	0	At the bottom quarter of the tank	out of focus, video very dark	can't validate food drop
t8	19	14	0	0	At the bottom quarter of the tank	out of focus, video very dark	can't validate food drop
t8	19	15	0	0	At the bottom quarter of the tank	out of focus, video very dark	can't validate food drop
t8	19	16	0	0	At the bottom quarter of the tank	out of focus, video very dark	can't validate food drop
t8	19	17	0	0	At the bottom quarter of the tank	out of focus, video very dark	can't validate food drop
t8	19	18	0	0	At the bottom quarter of the tank	out of focus, video very dark	can't validate food drop
t8	20	0	0	0	At the bottom of the tank	out of focus, video very dark	can't validate food drop
t8	20	1	0	0	At the bottom of the tank	out of focus, video very dark	can't validate food drop
t8	20	2	1	0	At the bottom of the tank	out of focus, video very dark	can't validate food drop
t8	20	3	0	0	At the bottom of the tank	out of focus, video very dark	can't validate food drop
t8	20	4	0	0	At the bottom of the tank	out of focus, video very dark	can't validate food drop
t8	20	5	0	0	At the bottom of the tank	out of focus, video very dark	can't validate food drop
t8	20	6	0	0	At the bottom of the tank	out of focus, video very dark	can't validate food drop
t8	20	7	0	0	No food drop. At the bottom of the tank	out of focus, video very dark	can't validate food drop
t8	20	8	0	0	At the bottom of the tank	out of focus, video very dark	can't validate food drop
t8	20	9	1	0	At the bottom of the tank	out of focus, video very dark	can't validate food drop
t8	20	10	1	0	At the bottom of the tank	out of focus, video very dark	can't validate food drop
t8	20	11	0	0	At the bottom of the tank	out of focus, video very dark	can't validate food drop
t8	20	12	0	0	At the bottom of the tank	out of focus, video very dark	can't validate food drop
t8	20	13	0	0	At the bottom of the tank	out of focus, video very dark	can't validate food drop
t8	20	14	0	0	At the bottom of the tank	out of focus, video very dark	can't validate food drop
t8	20	15	0	0	At the bottom of the tank	out of focus, video very dark	can't validate food drop
t8	20	16	0	0	At the bottom of the tank	out of focus, video very dark	can't validate food drop
t8	20	17	0	0	At the bottom of the tank	out of focus, video very dark	can't validate food drop
t8	20	18	0	0	At the bottom of the tank	out of focus, video very dark	can't validate food drop
t8	21	0	0	0	fish at the bottom of the tank	out of focus, video very dark	can't validate food drop
t8	21	1	0	0	fish at the bottom of the tank	out of focus, video very dark	can't validate food drop
t8	21	2	0	0	fish at the bottom of the tank	out of focus, video very dark	can't validate food drop
t8	21	3	0	0	fish at the bottom of the tank	out of focus, video very dark	can't validate food drop
t8	21	4	0	0	fish at the bottom of the tank	out of focus, video very dark	can't validate food drop
t8	21	5	0	0	fish at the bottom of the tank	out of focus, video very dark	can't validate food drop
t8	21	6	0	0	fish at the bottom of the tank	out of focus, video very dark	can't validate food drop
t8	21	7	0	0	No food drop. fish at the bottom of the tank	out of focus, video very dark	can't validate food drop
t8	21	8	0	0	fish at the bottom of the tank	out of focus, video very dark	can't validate food drop
t8	21	9	0	0	fish at the bottom of the tank	out of focus, video very dark	can't validate food drop
t8	21	10	0	0	fish at the bottom of the tank	out of focus, video very dark	can't validate food drop
t8	21	11	0	0	fish at the bottom of the tank	out of focus, video very dark	can't validate food drop
t8	21	12	0	0	fish at the bottom of the tank	out of focus, video very dark	can't validate food drop
t8	21	13	0	0	fish at the bottom of the tank	out of focus, video very dark	can't validate food drop
t8	21	14	0	0	fish at the bottom of the tank	out of focus, video very dark	can't validate food drop
t8	21	15	0	0	fish at the bottom of the tank	out of focus, video very dark	can't validate food drop
t8	21	16	0	0	fish at the bottom of the tank	out of focus, video very dark	can't validate food drop
t8	21	17	0	0	fish at the bottom of the tank	out of focus, video very dark	can't validate food drop
t8	21	18	0	0	fish at the bottom of the tank	out of focus, video very dark	can't validate food drop

## Sheet: Fish_10
Animal ID (WT)	Video #	Second #	Animal Moving Upward? (any displacement toward the light's direction, inferred from the position the next second) (1 = yes; 0 = no)	Animal at Surface? (1 = yes; 0 = no)	Behavior Notes	Video Quality Notes	Other notes
t10	0	0	0	0	fish at the bottom of the tank	out of focus	can't validate food drop
t10	0	1	0	0	fish at the bottom of the tank	out of focus	can't validate food drop
t10	0	2	0	0	fish at the bottom of the tank	out of focus	can't validate food drop
t10	0	3	0	0	fish at the bottom of the tank	out of focus	can't validate food drop
t10	0	4	0	0	fish at the bottom of the tank	out of focus	can't validate food drop
t10	0	5	0	0	fish at the bottom of the tank	out of focus	can't validate food drop
t10	0	6	0	0	fish at the bottom of the tank	out of focus	can't validate food drop
t10	0	7	0	0	fish at the bottom of the tank	out of focus	can't validate food drop
t10	0	8	0	0	fish at the bottom of the tank	out of focus	can't validate food drop
t10	0	9	0	0	fish at the bottom of the tank	out of focus	can't validate food drop
t10	0	10	0	0	fish at the bottom of the tank	out of focus	can't validate food drop
t10	0	11	0	0	fish at the bottom of the tank	out of focus	can't validate food drop
t10	0	12	0	0	fish at the bottom of the tank	out of focus	can't validate food drop
t10	0	13	0	0	fish at the bottom of the tank	out of focus	can't validate food drop
t10	0	14	0	0	fish at the bottom of the tank	out of focus	can't validate food drop
t10	0	15	0	0	fish at the bottom of the tank	out of focus	can't validate food drop
t10	0	16	0	0	fish at the bottom of the tank	out of focus	can't validate food drop
t10	0	17	0	0	fish at the bottom of the tank	out of focus	can't validate food drop
t10	0	18	0	0	fish at the bottom of the tank	out of focus	can't validate food drop
t10	1	0	0	0		out of focus	can't validate food drop
t10	1	1	1	0		out of focus	can't validate food drop
t10	1	2	0	0		out of focus	can't validate food drop
t10	1	3	0	0		out of focus	can't validate food drop
t10	1	4	0	0		out of focus	can't validate food drop
t10	1	5	0	0		out of focus	can't validate food drop
t10	1	6	1	0		out of focus	can't validate food drop
t10	1	7	1	0		out of focus	can't validate food drop
t10	1	8	1	0		out of focus	can't validate food drop
t10	1	9	1	0		out of focus	can't validate food drop
t10	1	10	1	0		out of focus	can't validate food drop
t10	1	11	1	0		out of focus	can't validate food drop
t10	1	12	0	1		out of focus	can't validate food drop
t10	1	13	0	1		out of focus	can't validate food drop
t10	1	14	0	1		out of focus	can't validate food drop
t10	1	15	0	1	eating?	out of focus	can't validate food drop
t10	1	16	0	1	eating?	out of focus	can't validate food drop
t10	1	17	0	1	eating?	out of focus	can't validate food drop
t10	1	18	0	1	eating?	out of focus	can't validate food drop
t10	2	0	1	0		out of focus	can't validate food drop
t10	2	1	1	0		out of focus	can't validate food drop
t10	2	2	1	0		out of focus	can't validate food drop
t10	2	3	1	0		out of focus	can't validate food drop
t10	2	4	0	1	eating?	out of focus	can't validate food drop
t10	2	5	0	1	eating?	out of focus	can't validate food drop
t10	2	6	0	1	eating?	out of focus	can't validate food drop
t10	2	7	0	1	eating?	out of focus	can't validate food drop
t10	2	8	0	1	eating?	out of focus	can't validate food drop
t10	2	9	0	1	eating?	out of focus	can't validate food drop
t10	2	10	0	1	eating?	out of focus	can't validate food drop
t10	2	11	0	1	eating?	out of focus	can't validate food drop
t10	2	12	0	1	eating?	out of focus	can't validate food drop
t10	2	13	0	1	eating?	out of focus	can't validate food drop
t10	2	14	0	1	eating?	out of focus	can't validate food drop
t10	2	15	0	1	eating?	out of focus	can't validate food drop
t10	2	16	0	1	eating?	out of focus	can't validate food drop
t10	2	17	0	1	eating?	out of focus	can't validate food drop
t10	2	18	0	1	eating?	out of focus	can't validate food drop
t10	3	0	0	0		out of focus	can't validate food drop
t10	3	1	0	0		out of focus	can't validate food drop
t10	3	2	1	0		out of focus	can't validate food drop
t10	3	3	1	0		out of focus	can't validate food drop
t10	3	4	1	0		out of focus	can't validate food drop
t10	3	5	1	0		out of focus	can't validate food drop
t10	3	6	1	0		out of focus	can't validate food drop
t10	3	7	0	1		out of focus	can't validate food drop
t10	3	8	0	1		out of focus	can't validate food drop
t10	3	9	0	1	eating?	out of focus	can't validate food drop
t10	3	10	0	1	eating?	out of focus	can't validate food drop
t10	3	11	0	1	eating?	out of focus	can't validate food drop
t10	3	12	0	1	eating?	out of focus	can't validate food drop
t10	3	13	0	1	eating?	out of focus	can't validate food drop
t10	3	14	0	1	eating?	out of focus	can't validate food drop
t10	3	15	0	1	eating?	out of focus	can't validate food drop
t10	3	16	0	1	eating?	out of focus	can't validate food drop
t10	3	17	0	1	eating?	out of focus	can't validate food drop
t10	3	18	0	1	eating?	out of focus	can't validate food drop
t10	4	0	0	0		out of focus	can't validate food drop
t10	4	1	1	0		out of focus	can't validate food drop
t10	4	2	1	0		out of focus	can't validate food drop
t10	4	3	1	0		out of focus	can't validate food drop
t10	4	4	1	0		out of focus	can't validate food drop
t10	4	5	1	0		out of focus	can't validate food drop
t10	4	6	1	0		out of focus	can't validate food drop
t10	4	7	1	0		out of focus	can't validate food drop
t10	4	8	0	1		out of focus	can't validate food drop
t10	4	9	0	1		out of focus	can't validate food drop
t10	4	10	0	1		out of focus	can't validate food drop
t10	4	11	0	1		out of focus	can't validate food drop
t10	4	12	0	1		out of focus	can't validate food drop
t10	4	13	0	1		out of focus	can't validate food drop
t10	4	14	0	1		out of focus	can't validate food drop
t10	4	15	0	1		out of focus	can't validate food drop
t10	4	16	0	1		out of focus	can't validate food drop
t10	4	17	0	1		out of focus	can't validate food drop
t10	4	18	0	1		out of focus	can't validate food drop
t10	5	0	1	0		out of focus	can't validate food drop
t10	5	1	1	0		out of focus	can't validate food drop
t10	5	2	1	0		out of focus	can't validate food drop
t10	5	3	1	0		out of focus	can't validate food drop
t10	5	4	0	1		out of focus	can't validate food drop
t10	5	5	0	1		out of focus	can't validate food drop
t10	5	6	0	1		out of focus	can't validate food drop
t10	5	7	0	1		out of focus	can't validate food drop
t10	5	8	0	1		out of focus	can't validate food drop
t10	5	9	0	1		out of focus	can't validate food drop
t10	5	10	0	1		out of focus	can't validate food drop
t10	5	11	0	1		out of focus	can't validate food drop
t10	5	12	0	1		out of focus	can't validate food drop
t10	5	13	0	1		out of focus	can't validate food drop
t10	5	14	0	1		out of focus	can't validate food drop
t10	5	15	0	1		out of focus	can't validate food drop
t10	5	16	0	1		out of focus	can't validate food drop
t10	5	17	0	1		out of focus	can't validate food drop
t10	5	18	0	1		out of focus	can't validate food drop
t10	6	0	0	0	within 2 cm from the surface	out of focus	can't validate food drop
t10	6	1	0	0	within 2 cm from the surface	out of focus	can't validate food drop
t10	6	2	1	0	within 2 cm from the surface	out of focus	can't validate food drop
t10	6	3	0	1		out of focus	can't validate food drop
t10	6	4	0	1		out of focus	can't validate food drop
t10	6	5	0	1	eating?	out of focus	can't validate food drop
t10	6	6	0	1	eating?	out of focus	can't validate food drop
t10	6	7	0	1	eating?	out of focus	can't validate food drop
t10	6	8	0	1	eating?	out of focus	can't validate food drop
t10	6	9	0	1	eating?	out of focus	can't validate food drop
t10	6	10	0	1	eating?	out of focus	can't validate food drop
t10	6	11	0	1	eating?	out of focus	can't validate food drop
t10	6	12	0	1	eating?	out of focus	can't validate food drop
t10	6	13	0	1	eating?	out of focus	can't validate food drop
t10	6	14	0	1	eating?	out of focus	can't validate food drop
t10	6	15	0	1	eating?	out of focus	can't validate food drop
t10	6	16	0	1	eating?	out of focus	can't validate food drop
t10	6	17	0	1	eating?	out of focus	can't validate food drop
t10	6	18	0	1	eating?	out of focus	can't validate food drop
t10	7	0	0	0	at the bottom of the tank	out of focus	can't validate food drop
t10	7	1	0	0	at the bottom of the tank	out of focus	can't validate food drop
t10	7	2	0	0	at the bottom of the tank	out of focus	can't validate food drop
t10	7	3	0	0	at the bottom of the tank	out of focus	can't validate food drop
t10	7	4	0	0	at the bottom of the tank	out of focus	can't validate food drop
t10	7	5	0	0	at the bottom of the tank	out of focus	can't validate food drop
t10	7	6	0	0	at the bottom of the tank	out of focus	can't validate food drop
t10	7	7	0	0	at the bottom of the tank	out of focus	can't validate food drop
t10	7	8	0	0	at the bottom of the tank	out of focus	can't validate food drop
t10	7	9	0	0	at the bottom of the tank	out of focus	can't validate food drop
t10	7	10	0	0	at the bottom of the tank	out of focus	can't validate food drop
t10	7	11	0	0	at the bottom of the tank	out of focus	can't validate food drop
t10	7	12	0	0	at the bottom of the tank	out of focus	can't validate food drop
t10	7	13	0	0	at the bottom of the tank	out of focus	can't validate food drop
t10	7	14	0	0	at the bottom of the tank	out of focus	can't validate food drop
t10	7	15	0	0	at the bottom of the tank	out of focus	can't validate food drop
t10	7	16	0	0	at the bottom of the tank	out of focus	can't validate food drop
t10	7	17	0	0	at the bottom of the tank	out of focus	can't validate food drop
t10	7	18	0	0	at the bottom of the tank	out of focus	can't validate food drop
t10	8	0	0	0		out of focus	can't validate food drop
t10	8	1	0	0		out of focus	can't validate food drop
t10	8	2	1	0		out of focus	can't validate food drop
t10	8	3	1	0		out of focus	can't validate food drop
t10	8	4	1	0		out of focus	can't validate food drop
t10	8	5	1	0		out of focus	can't validate food drop
t10	8	6	0	1		out of focus	can't validate food drop
t10	8	7	0	1		out of focus	can't validate food drop
t10	8	8	0	1	eating?	out of focus	can't validate food drop
t10	8	9	0	1	eating?	out of focus	can't validate food drop
t10	8	10	0	1	eating?	out of focus	can't validate food drop
t10	8	11	0	1	eating?	out of focus	can't validate food drop
t10	8	12	0	0	eating?	out of focus	can't validate food drop
t10	8	13	0	0		out of focus	can't validate food drop
t10	8	14	1	0		out of focus	can't validate food drop
t10	8	15	1	0		out of focus	can't validate food drop
t10	8	16	0	1		out of focus	can't validate food drop
t10	8	17	0	1	eating?	out of focus	can't validate food drop
t10	8	18	0	1	eating?	out of focus	can't validate food drop
t10	9	0	0	0	within 1 cm from surface	out of focus	can't validate food drop
t10	9	1	0	0		out of focus	can't validate food drop
t10	9	2	1	0		out of focus	can't validate food drop
t10	9	3	1	0		out of focus	can't validate food drop
t10	9	4	0	1		out of focus	can't validate food drop
t10	9	5	0	1		out of focus	can't validate food drop
t10	9	6	0	1		out of focus	can't validate food drop
t10	9	7	0	1		out of focus	can't validate food drop
t10	9	8	0	1		out of focus	can't validate food drop
t10	9	9	0	1		out of focus	can't validate food drop
t10	9	10	0	0		out of focus	can't validate food drop
t10	9	11	0	1		out of focus	can't validate food drop
t10	9	12	0	1		out of focus	can't validate food drop
t10	9	13	0	1		out of focus	can't validate food drop
t10	9	14	0	1		out of focus	can't validate food drop
t10	9	15	0	1	eating?	out of focus	can't validate food drop
t10	9	16	0	1	eating?	out of focus	can't validate food drop
t10	9	17	0	1	eating?	out of focus	can't validate food drop
t10	9	18	0	1	eating?	out of focus	can't validate food drop
t10	10	0	0	0		out of focus	can't validate food drop
t10	10	1	1	0		out of focus	can't validate food drop
t10	10	2	1	0		out of focus	can't validate food drop
t10	10	3	1	0		out of focus	can't validate food drop
t10	10	4	1	0		out of focus	can't validate food drop
t10	10	5	1	0		out of focus	can't validate food drop
t10	10	6	0	1		out of focus	can't validate food drop
t10	10	7	0	1		out of focus	can't validate food drop
t10	10	8	0	1		out of focus	can't validate food drop
t10	10	9	0	1	eating?	out of focus	can't validate food drop
t10	10	10	0	1		out of focus	can't validate food drop
t10	10	11	0	0		out of focus	can't validate food drop
t10	10	12	0	0		out of focus	can't validate food drop
t10	10	13	1	0		out of focus	can't validate food drop
t10	10	14	1	0		out of focus	can't validate food drop
t10	10	15	0	0		out of focus	can't validate food drop
t10	10	16	0	1		out of focus	can't validate food drop
t10	10	17	0	0		out of focus	can't validate food drop
t10	10	18	0	0		out of focus	can't validate food drop
t10	11	0	0	0		out of focus	can't validate food drop
t10	11	1	0	0		out of focus	can't validate food drop
t10	11	2	0	0		out of focus	can't validate food drop
t10	11	3	1	0		out of focus	can't validate food drop
t10	11	4	1	0		out of focus	can't validate food drop
t10	11	5	1	0		out of focus	can't validate food drop
t10	11	6	1	0		out of focus	can't validate food drop
t10	11	7	1	0		out of focus	can't validate food drop
t10	11	8	0	0	within 1 cm from surface	out of focus	can't validate food drop
t10	11	9	0	0		out of focus	can't validate food drop
t10	11	10	0	0		out of focus	can't validate food drop
t10	11	11	0	0		out of focus	can't validate food drop
t10	11	12	1	0		out of focus	can't validate food drop
t10	11	13	0	0		out of focus	can't validate food drop
t10	11	14	0	0		out of focus	can't validate food drop
t10	11	15	1	0		out of focus	can't validate food drop
t10	11	16	1	0		out of focus	can't validate food drop
t10	11	17	1	0		out of focus	can't validate food drop
t10	11	18	0	1		out of focus	can't validate food drop
t10	12	0	0	0		out of focus	can't validate food drop
t10	12	1	0	0		out of focus	can't validate food drop
t10	12	2	1	0		out of focus	can't validate food drop
t10	12	3	1	0		out of focus	can't validate food drop
t10	12	4	1	0		out of focus	can't validate food drop
t10	12	5	0	1		out of focus	can't validate food drop
t10	12	6	0	1		out of focus	can't validate food drop
t10	12	7	0	1		out of focus	can't validate food drop
t10	12	8	0	1		out of focus	can't validate food drop
t10	12	9	0	0		out of focus	can't validate food drop
t10	12	10	1	0		out of focus	can't validate food drop
t10	12	11	0	1		out of focus	can't validate food drop
t10	12	12	0	0		out of focus	can't validate food drop
t10	12	13	0	0	within 1 cm from surface	out of focus	can't validate food drop
t10	12	14	0	0		out of focus	can't validate food drop
t10	12	15	0	0		out of focus	can't validate food drop
t10	12	16	1	0		out of focus	can't validate food drop
t10	12	17	1	0		out of focus	can't validate food drop
t10	12	18	1	0		out of focus	can't validate food drop
t10	13	0	0	0	in the bottom of the tank, not moved	out of focus	can't validate food drop
t10	13	1	0	0	in the bottom of the tank, not moved	out of focus	can't validate food drop
t10	13	2	0	0	in the bottom of the tank, not moved	out of focus	can't validate food drop
t10	13	3	0	0	in the bottom of the tank, not moved	out of focus	can't validate food drop
t10	13	4	0	0	in the bottom of the tank, not moved	out of focus	can't validate food drop
t10	13	5	0	0	in the bottom of the tank, not moved	out of focus	can't validate food drop
t10	13	6	0	0	in the bottom of the tank, not moved	out of focus	can't validate food drop
t10	13	7	0	0	in the bottom of the tank, not moved	out of focus	can't validate food drop
t10	13	8	0	0	in the bottom of the tank, not moved	out of focus	can't validate food drop
t10	13	9	0	0	in the bottom of the tank, not moved	out of focus	can't validate food drop
t10	13	10	0	0	in the bottom of the tank, not moved	out of focus	can't validate food drop
t10	13	11	0	0	in the bottom of the tank, not moved	out of focus	can't validate food drop
t10	13	12	0	0	in the bottom of the tank, not moved	out of focus	can't validate food drop
t10	13	13	0	0	in the bottom of the tank, not moved	out of focus	can't validate food drop
t10	13	14	0	0	in the bottom of the tank, not moved	out of focus	can't validate food drop
t10	13	15	0	0	in the bottom of the tank, not moved	out of focus	can't validate food drop
t10	13	16	0	0	in the bottom of the tank, not moved	out of focus	can't validate food drop
t10	13	17	0	0	in the bottom of the tank, not moved	out of focus	can't validate food drop
t10	13	18	0	0	in the bottom of the tank, not moved	out of focus	can't validate food drop
t10	14	0	0	0	in the bottom of the tank	out of focus	can't validate food drop
t10	14	1	0	0	in the bottom of the tank	out of focus	can't validate food drop
t10	14	2	0	0	in the bottom of the tank	out of focus	can't validate food drop
t10	14	3	0	0	in the bottom of the tank	out of focus	can't validate food drop
t10	14	4	0	0	in the bottom of the tank	out of focus	can't validate food drop
t10	14	5	0	0	in the bottom of the tank	out of focus	can't validate food drop
t10	14	6	0	0	in the bottom of the tank	out of focus	can't validate food drop
t10	14	7	0	0	in the bottom of the tank	out of focus	can't validate food drop
t10	14	8	0	0	in the bottom of the tank	out of focus	can't validate food drop
t10	14	9	0	0	in the bottom of the tank	out of focus	can't validate food drop
t10	14	10	0	0	in the bottom of the tank	out of focus	can't validate food drop
t10	14	11	0	0	in the bottom of the tank	out of focus	can't validate food drop
t10	14	12	0	0	in the bottom of the tank	out of focus	can't validate food drop
t10	14	13	0	0	in the bottom of the tank	out of focus	can't validate food drop
t10	14	14	0	0	in the bottom of the tank	out of focus	can't validate food drop
t10	14	15	0	0	in the bottom of the tank	out of focus	can't validate food drop
t10	14	16	0	0	in the bottom of the tank	out of focus	can't validate food drop
t10	14	17	0	0	in the bottom of the tank	out of focus	can't validate food drop
t10	14	18	0	0	in the bottom of the tank	out of focus	can't validate food drop
t10	15	0	0	0		out of focus	can't validate food drop
t10	15	1	0	0		out of focus	can't validate food drop
t10	15	2	0	0		out of focus	can't validate food drop
t10	15	3	0	0		out of focus	can't validate food drop
t10	15	4	0	0		out of focus	can't validate food drop
t10	15	5	0	0		out of focus	can't validate food drop
t10	15	6	1	0		out of focus	can't validate food drop
t10	15	7	1	0		out of focus	can't validate food drop
t10	15	8	1	0		out of focus	can't validate food drop
t10	15	9	1	0		out of focus	can't validate food drop
t10	15	10	0	0		out of focus	can't validate food drop
t10	15	11	0	0		out of focus	can't validate food drop
t10	15	12	0	0		out of focus	can't validate food drop
t10	15	13	0	0		out of focus	can't validate food drop
t10	15	14	1	0		out of focus	can't validate food drop
t10	15	15	1	0		out of focus	can't validate food drop
t10	15	16	1	0		out of focus	can't validate food drop
t10	15	17	1	0		out of focus	can't validate food drop
t10	15	18	0	1		out of focus	can't validate food drop
t10	16	0	0	0		out of focus	can't validate food drop
t10	16	1	1	0		out of focus	can't validate food drop
t10	16	2	1	0		out of focus	can't validate food drop
t10	16	3	1	0		out of focus	can't validate food drop
t10	16	4	1	0		out of focus	can't validate food drop
t10	16	5	1	0		out of focus	can't validate food drop
t10	16	6	0	1		out of focus	can't validate food drop
t10	16	7	0	1		out of focus	can't validate food drop
t10	16	8	0	1		out of focus	can't validate food drop
t10	16	9	0	0		out of focus	can't validate food drop
t10	16	10	0	0		out of focus	can't validate food drop
t10	16	11	0	0		out of focus	can't validate food drop
t10	16	12	0	0		out of focus	can't validate food drop
t10	16	13	0	0		out of focus	can't validate food drop
t10	16	14	0	0		out of focus	can't validate food drop
t10	16	15	0	0		out of focus	can't validate food drop
t10	16	16	0	0		out of focus	can't validate food drop
t10	16	17	0	0		out of focus	can't validate food drop
t10	16	18	0	0		out of focus	can't validate food drop
t10	17	0	0	0		out of focus	can't validate food drop
t10	17	1	1	0		out of focus	can't validate food drop
t10	17	2	1	0		out of focus	can't validate food drop
t10	17	3	1	0		out of focus	can't validate food drop
t10	17	4	1	0		out of focus	can't validate food drop
t10	17	5	1	0		out of focus	can't validate food drop
t10	17	6	0	0		out of focus	can't validate food drop
t10	17	7	0	0		out of focus	can't validate food drop
t10	17	8	0	0		out of focus	can't validate food drop
t10	17	9	0	0		out of focus	can't validate food drop
t10	17	10	0	0		out of focus	can't validate food drop
t10	17	11	0	0		out of focus	can't validate food drop
t10	17	12	0	0		out of focus	can't validate food drop
t10	17	13	0	0		out of focus	can't validate food drop
t10	17	14	0	0		out of focus	can't validate food drop
t10	17	15	1	0		out of focus	can't validate food drop
t10	17	16	1	0		out of focus	can't validate food drop
t10	17	17	1	0		out of focus	can't validate food drop
t10	17	18	1	0		out of focus	can't validate food drop
t10	18	0	0	0		out of focus	can't validate food drop
t10	18	1	0	0		out of focus	can't validate food drop
t10	18	2	1	0		out of focus	can't validate food drop
t10	18	3	1	0		out of focus	can't validate food drop
t10	18	4	1	0		out of focus	can't validate food drop
t10	18	5	1	0		out of focus	can't validate food drop
t10	18	6	1	0		out of focus	can't validate food drop
t10	18	7	1	0		out of focus	can't validate food drop
t10	18	8	1	0		out of focus	can't validate food drop
t10	18	9	0	0	facing the back of the tank	out of focus	can't validate food drop
t10	18	10	0	0		out of focus	can't validate food drop
t10	18	11	0	0		out of focus	can't validate food drop
t10	18	12	0	0		out of focus	can't validate food drop
t10	18	13	0	0		out of focus	can't validate food drop
t10	18	14	0	0		out of focus	can't validate food drop
t10	18	15	0	0		out of focus	can't validate food drop
t10	18	16	0	0		out of focus	can't validate food drop
t10	18	17	0	0		out of focus	can't validate food drop
t10	18	18	0	0		out of focus	can't validate food drop
t10	19	0	1	0	middle of the tank	out of focus	can't validate food drop
t10	19	1	1	0		out of focus	can't validate food drop
t10	19	2	0	0		out of focus	can't validate food drop
t10	19	3	1	0		out of focus	can't validate food drop
t10	19	4	1	0		out of focus	can't validate food drop
t10	19	5	0	0		out of focus	can't validate food drop
t10	19	6	1	0		out of focus	can't validate food drop
t10	19	7	0	0		out of focus	can't validate food drop
t10	19	8	0	0		out of focus	can't validate food drop
t10	19	9	1	0		out of focus	can't validate food drop
t10	19	10	0	1	the back of the tank	out of focus	can't validate food drop
t10	19	11	0	1	the back of the tank	out of focus	can't validate food drop
t10	19	12	0	1	the back of the tank	out of focus	can't validate food drop
t10	19	13	0	1	the back of the tank	out of focus	can't validate food drop
t10	19	14	0	1	the back of the tank	out of focus	can't validate food drop
t10	19	15	0	1	the back of the tank	out of focus	can't validate food drop
t10	19	16	0	1	the back of the tank	out of focus	can't validate food drop
t10	19	17	0	1	the back of the tank	out of focus	can't validate food drop
t10	19	18	0	1	the back of the tank	out of focus	can't validate food drop
t10	20	0	0	0	middle of the tank	out of focus	can't validate food drop
t10	20	1	0	0		out of focus	can't validate food drop
t10	20	2	0	0		out of focus	can't validate food drop
t10	20	3	0	0		out of focus	can't validate food drop
t10	20	4	0	0		out of focus	can't validate food drop
t10	20	5	0	0		out of focus	can't validate food drop
t10	20	6	0	0		out of focus	can't validate food drop
t10	20	7	0	0		out of focus	can't validate food drop
t10	20	8	0	0		out of focus	can't validate food drop
t10	20	9	0	0		out of focus	can't validate food drop
t10	20	10	0	0		out of focus	can't validate food drop
t10	20	11	0	0		out of focus	can't validate food drop
t10	20	12	0	0		out of focus	can't validate food drop
t10	20	13	0	0		out of focus	can't validate food drop
t10	20	14	0	0		out of focus	can't validate food drop
t10	20	15	0	0		out of focus	can't validate food drop
t10	20	16	0	0		out of focus	can't validate food drop
t10	20	17	0	0		out of focus	can't validate food drop
t10	20	18	0	0		out of focus	can't validate food drop
t10	21	0	0	0		out of focus	can't validate food drop
t10	21	1	0	0		out of focus	can't validate food drop
t10	21	2	0	0		out of focus	can't validate food drop
t10	21	3	0	0		out of focus	can't validate food drop
t10	21	4	0	0		out of focus	can't validate food drop
t10	21	5	0	0		out of focus	can't validate food drop
t10	21	6	0	0		out of focus	can't validate food drop
t10	21	7	0	0		out of focus	can't validate food drop
t10	21	8	0	0		out of focus	can't validate food drop
t10	21	9	0	0		out of focus	can't validate food drop
t10	21	10	0	0		out of focus	can't validate food drop
t10	21	11	0	0		out of focus	can't validate food drop
t10	21	12	0	0		out of focus	can't validate food drop
t10	21	13	0	0		out of focus	can't validate food drop
t10	21	14	0	0		out of focus	can't validate food drop
t10	21	15	0	0		out of focus	can't validate food drop
t10	21	16	1	0		out of focus	can't validate food drop
t10	21	17	0	0		out of focus	can't validate food drop
t10	21	18	0	0		out of focus	can't validate food drop

## Sheet: Fish_15
Animal ID (WT)	Video #	Second #	Animal Moving Upward? (any displacement toward the light's direction, inferred from the position the next second) (1 = yes; 0 = no)	Animal at Surface? (1 = yes; 0 = no)	Behavior Notes	Video Quality Notes	Other notes
t15	0	0	0	0	in the middle of the tank. Not moving much	out of focus, video very dark
t15	0	1	0	0	in the middle of the tank. Not moving much	out of focus, video very dark
t15	0	2	0	0	in the middle of the tank. Not moving much	out of focus, video very dark
t15	0	3	0	0	in the middle of the tank. Not moving much	out of focus, video very dark
t15	0	4	0	0	in the middle of the tank. Not moving much	out of focus, video very dark
t15	0	5	0	0	in the middle of the tank. Not moving much	out of focus, video very dark
t15	0	6	0	0	in the middle of the tank. Not moving much	out of focus, video very dark
t15	0	7	0	0	in the middle of the tank. Not moving much	out of focus, video very dark
t15	0	8	0	0	in the middle of the tank. Not moving much	out of focus, video very dark
t15	0	9	0	0	in the middle of the tank. Not moving much	out of focus, video very dark
t15	0	10	0	0	in the middle of the tank. Not moving much	out of focus, video very dark
t15	0	11	0	0	in the middle of the tank. Not moving much	out of focus, video very dark
t15	0	12	0	0	in the middle of the tank. Not moving much	out of focus, video very dark
t15	0	13	0	0	in the middle of the tank. Not moving much	out of focus, video very dark
t15	0	14	0	0	in the middle of the tank. Not moving much	out of focus, video very dark
t15	0	15	0	0	in the middle of the tank. Not moving much	out of focus, video very dark
t15	0	16	0	0	in the middle of the tank. Not moving much	out of focus, video very dark
t15	0	17	0	0	in the middle of the tank. Not moving much	out of focus, video very dark
t15	0	18	0	0	in the middle of the tank. Not moving much	out of focus, video very dark
t15	1	0	0	1	in the bottom of the tank	out of focus, video very dark
t15	1	1	0	0	in the bottom of the tank	out of focus, video very dark
t15	1	2	0	0	in the bottom of the tank	out of focus, video very dark
t15	1	3	0	0	in the bottom of the tank	out of focus, video very dark
t15	1	4	0	0	in the bottom of the tank	out of focus, video very dark
t15	1	5	0	0	in the bottom of the tank	out of focus, video very dark
t15	1	6	0	0	in the bottom of the tank	out of focus, video very dark
t15	1	7	0	0	in the bottom of the tank	out of focus, video very dark
t15	1	8	0	0	in the bottom of the tank	out of focus, video very dark
t15	1	9	0	0	in the bottom of the tank	out of focus, video very dark
t15	1	10	0	0	in the bottom of the tank	out of focus, video very dark
t15	1	11	0	0	in the bottom of the tank	out of focus, video very dark
t15	1	12	0	0	in the bottom of the tank	out of focus, video very dark
t15	1	13	0	0	in the bottom of the tank	out of focus, video very dark
t15	1	14	0	0	in the bottom of the tank	out of focus, video very dark
t15	1	15	0	0	in the bottom of the tank	out of focus, video very dark
t15	1	16	0	0	in the bottom of the tank	out of focus, video very dark
t15	1	17	0	0	in the bottom of the tank	out of focus, video very dark
t15	1	18	0	0	in the bottom of the tank	out of focus, video very dark
t15	2	0	0	1	at the back of the tank	out of focus, video very dark
t15	2	1	0	1	at the back of the tank	out of focus, video very dark
t15	2	2	0	1	at the back of the tank	out of focus, video very dark
t15	2	3	0	0	at the back of the tank	out of focus, video very dark
t15	2	4	0	0	at the back of the tank	out of focus, video very dark
t15	2	5	0	0	at the back of the tank	out of focus, video very dark
t15	2	6	0	0	at the back of the tank	out of focus, video very dark
t15	2	7	0	0	at the back of the tank	out of focus, video very dark
t15	2	8	0	0	at the back of the tank	out of focus, video very dark
t15	2	9	0	0	at the back of the tank	out of focus, video very dark
t15	2	10	0	0	at the back of the tank	out of focus, video very dark
t15	2	11	0	0	at the back of the tank	out of focus, video very dark
t15	2	12	0	0	at the back of the tank	out of focus, video very dark
t15	2	13	0	0	at the back of the tank	out of focus, video very dark
t15	2	14	0	0	at the back of the tank	out of focus, video very dark
t15	2	15	0	0	at the back of the tank	out of focus, video very dark
t15	2	16	0	0	at the back of the tank	out of focus, video very dark
t15	2	17	0	0	at the back of the tank	out of focus, video very dark
t15	2	18	0	0	at the back of the tank	out of focus, video very dark
t15	3	0	1	0		out of focus, video very dark
t15	3	1	1	0		out of focus, video very dark
t15	3	2	0	0	got scared	out of focus, video very dark
t15	3	3	1	0	at the back of the tank	out of focus, video very dark
t15	3	4	0	0	at the back of the tank	out of focus, video very dark
t15	3	5	0	0	at the back of the tank	out of focus, video very dark
t15	3	6	0	0	at the back of the tank	out of focus, video very dark
t15	3	7	0	0	at the back of the tank	out of focus, video very dark
t15	3	8	0	0	at the back of the tank	out of focus, video very dark
t15	3	9	0	0	at the back of the tank	out of focus, video very dark
t15	3	10	0	0	at the back of the tank	out of focus, video very dark
t15	3	11	0	0	at the back of the tank	out of focus, video very dark
t15	3	12	0	0	at the back of the tank	out of focus, video very dark
t15	3	13	0	0	at the back of the tank	out of focus, video very dark
t15	3	14	0	0	at the back of the tank	out of focus, video very dark
t15	3	15	0	0	at the back of the tank	out of focus, video very dark
t15	3	16	0	0	at the back of the tank	out of focus, video very dark
t15	3	17	0	0	at the back of the tank	out of focus, video very dark
t15	3	18	0	0	at the back of the tank	out of focus, video very dark
t15	4	0	0	0		out of focus, video very dark
t15	4	1	0	0		out of focus, video very dark
t15	4	2	1	0		out of focus, video very dark
t15	4	3	1	0		out of focus, video very dark
t15	4	4	1	0		out of focus, video very dark
t15	4	5	1	0		out of focus, video very dark
t15	4	6	0	1		out of focus, video very dark
t15	4	7	0	1		out of focus, video very dark
t15	4	8	0	1		out of focus, video very dark
t15	4	9	0	1		out of focus, video very dark
t15	4	10	0	1		out of focus, video very dark
t15	4	11	0	1		out of focus, video very dark
t15	4	12	0	1		out of focus, video very dark
t15	4	13	0	1		out of focus, video very dark
t15	4	14	0	1		out of focus, video very dark
t15	4	15	0	1	eating	out of focus, video very dark
t15	4	16	0	1	eating	out of focus, video very dark
t15	4	17	0	1	eating	out of focus, video very dark
t15	4	18	0	1	eating	out of focus, video very dark
t15	5	0	0	0		out of focus, video very dark
t15	5	1	0	0		out of focus, video very dark
t15	5	2	0	0		out of focus, video very dark
t15	5	3	0	0		out of focus, video very dark
t15	5	4	0	0		out of focus, video very dark
t15	5	5	0	0		out of focus, video very dark
t15	5	6	0	0		out of focus, video very dark
t15	5	7	0	0		out of focus, video very dark
t15	5	8	0	0		out of focus, video very dark
t15	5	9	0	0		out of focus, video very dark
t15	5	10	0	0		out of focus, video very dark
t15	5	11	1	0		out of focus, video very dark
t15	5	12	1	0		out of focus, video very dark
t15	5	13	1	0		out of focus, video very dark
t15	5	14	0	1	eating	out of focus, video very dark
t15	5	15	0	1	eating	out of focus, video very dark
t15	5	16	0	1	eating	out of focus, video very dark
t15	5	17	0	1	eating	out of focus, video very dark
t15	5	18	0	1	eating	out of focus, video very dark
t15	6	0	0	0		out of focus, video very dark
t15	6	1	0	0		out of focus, video very dark
t15	6	2	0	0		out of focus, video very dark
t15	6	3	0	0		out of focus, video very dark
t15	6	4	0	0		out of focus, video very dark
t15	6	5	0	0		out of focus, video very dark
t15	6	6	0	0		out of focus, video very dark
t15	6	7	0	0		out of focus, video very dark
t15	6	8	0	0		out of focus, video very dark
t15	6	9	0	0		out of focus, video very dark
t15	6	10	0	0	fish at the bottom of the tank	out of focus, video very dark
t15	6	11	0	0	fish at the bottom of the tank	out of focus, video very dark
t15	6	12	0	0	fish at the bottom of the tank	out of focus, video very dark
t15	6	13	0	0	fish at the bottom of the tank	out of focus, video very dark
t15	6	14	0	0	fish at the bottom of the tank	out of focus, video very dark
t15	6	15	0	0	fish at the bottom of the tank	out of focus, video very dark
t15	6	16	0	0	fish at the bottom of the tank	out of focus, video very dark
t15	6	17	0	0	fish at the bottom of the tank	out of focus, video very dark
t15	6	18	0	0	fish at the bottom of the tank	out of focus, video very dark
t15	7	0	0	0	at the bottom of the tank	out of focus, video very dark
t15	7	1	0	0	at the bottom of the tank	out of focus, video very dark
t15	7	2	0	0	at the bottom of the tank	out of focus, video very dark
t15	7	3	0	0	at the bottom of the tank	out of focus, video very dark
t15	7	4	0	0	at the bottom of the tank	out of focus, video very dark
t15	7	5	0	0	at the bottom of the tank	out of focus, video very dark
t15	7	6	0	0	at the bottom of the tank	out of focus, video very dark
t15	7	7	0	0	at the bottom of the tank	out of focus, video very dark
t15	7	8	0	0	at the bottom of the tank	out of focus, video very dark
t15	7	9	0	0	at the bottom of the tank	out of focus, video very dark
t15	7	10	0	0	at the bottom of the tank	out of focus, video very dark
t15	7	11	0	0	at the bottom of the tank	out of focus, video very dark
t15	7	12	0	0	at the bottom of the tank	out of focus, video very dark
t15	7	13	0	0	at the bottom of the tank	out of focus, video very dark
t15	7	14	0	0	at the bottom of the tank	out of focus, video very dark
t15	7	15	0	0	at the bottom of the tank	out of focus, video very dark
t15	7	16	0	0	at the bottom of the tank	out of focus, video very dark
t15	7	17	0	0	at the bottom of the tank	out of focus, video very dark
t15	7	18	0	0	at the bottom of the tank	out of focus, video very dark
t15	8	0	0	0	within 2 cm from the surface	out of focus, video very dark
t15	8	1	0	0	within 2 cm from the surface	out of focus, video very dark
t15	8	2	0	0	within 2 cm from the surface	out of focus, video very dark
t15	8	3	0	0	within 2 cm from the surface	out of focus, video very dark
t15	8	4	0	0	within 2 cm from the surface	out of focus, video very dark
t15	8	5	0	0		out of focus, video very dark
t15	8	6	0	0		out of focus, video very dark
t15	8	7	0	0		out of focus, video very dark
t15	8	8	0	0		out of focus, video very dark
t15	8	9	0	0		out of focus, video very dark
t15	8	10	0	0		out of focus, video very dark
t15	8	11	1	0		out of focus, video very dark
t15	8	12	1	0		out of focus, video very dark
t15	8	13	1	0		out of focus, video very dark
t15	8	14	0	1	eating	out of focus, video very dark
t15	8	15	0	1		out of focus, video very dark
t15	8	16	0	0		out of focus, video very dark
t15	8	17	1	0		out of focus, video very dark
t15	8	18	0	1	eating	out of focus, video very dark
t15	9	0	0	0		out of focus, video very dark
t15	9	1	0	0		out of focus, video very dark
t15	9	2	0	0		out of focus, video very dark
t15	9	3	0	0		out of focus, video very dark
t15	9	4	1	0		out of focus, video very dark
t15	9	5	0	0		out of focus, video very dark
t15	9	6	0	0		out of focus, video very dark
t15	9	7	0	0		out of focus, video very dark
t15	9	8	1	0		out of focus, video very dark
t15	9	9	1	0		out of focus, video very dark
t15	9	10	1	0		out of focus, video very dark
t15	9	11	1	0		out of focus, video very dark
t15	9	12	0	1	eating	out of focus, video very dark
t15	9	13	0	1	eating	out of focus, video very dark
t15	9	14	0	1	eating	out of focus, video very dark
t15	9	15	0	1	eating	out of focus, video very dark
t15	9	16	0	1	eating	out of focus, video very dark
t15	9	17	0	1	eating	out of focus, video very dark
t15	9	18	0	1	eating	out of focus, video very dark
t15	10	0	0	1	at surface	out of focus, video very dark
t15	10	1	0	1		out of focus, video very dark
t15	10	2	0	1		out of focus, video very dark
t15	10	3	0	1		out of focus, video very dark
t15	10	4	0	1		out of focus, video very dark
t15	10	5	0	1		out of focus, video very dark
t15	10	6	0	1		out of focus, video very dark
t15	10	7	0	1	eating	out of focus, video very dark
t15	10	8	0	0		out of focus, video very dark
t15	10	9	0	0		out of focus, video very dark
t15	10	10	0	0		out of focus, video very dark
t15	10	11	0	0		out of focus, video very dark
t15	10	12	1	0		out of focus, video very dark
t15	10	13	1	0		out of focus, video very dark
t15	10	14	1	0		out of focus, video very dark
t15	10	15	0	1	eating	out of focus, video very dark
t15	10	16	0	1	eating	out of focus, video very dark
t15	10	17	0	1	eating	out of focus, video very dark
t15	10	18	0	1	eating	out of focus, video very dark
t15	11	0	0	0		out of focus, video very dark
t15	11	1	0	0		out of focus, video very dark
t15	11	2	0	0		out of focus, video very dark
t15	11	3	0	0		out of focus, video very dark
t15	11	4	0	0		out of focus, video very dark
t15	11	5	0	0		out of focus, video very dark
t15	11	6	0	0		out of focus, video very dark
t15	11	7	0	0		out of focus, video very dark
t15	11	8	0	0		out of focus, video very dark
t15	11	9	0	0		out of focus, video very dark
t15	11	10	0	0		out of focus, video very dark
t15	11	11	0	0		out of focus, video very dark
t15	11	12	0	0		out of focus, video very dark
t15	11	13	0	0		out of focus, video very dark
t15	11	14	1	0		out of focus, video very dark
t15	11	15	1	0		out of focus, video very dark
t15	11	16	1	0		out of focus, video very dark
t15	11	17	1	0		out of focus, video very dark
t15	11	18	1	0	not reach the surface ultimately	out of focus, video very dark
t15	12	0	0	0	within 2 cm from the surface	out of focus, video very dark
t15	12	1	0	0	within 2 cm from the surface	out of focus, video very dark
t15	12	2	0	0	within 2 cm from the surface	out of focus, video very dark
t15	12	3	0	0		out of focus, video very dark
t15	12	4	0	0		out of focus, video very dark
t15	12	5	0	0		out of focus, video very dark
t15	12	6	0	0		out of focus, video very dark
t15	12	7	1	0		out of focus, video very dark
t15	12	8	1	0		out of focus, video very dark
t15	12	9	0	0		out of focus, video very dark
t15	12	10	1	0		out of focus, video very dark
t15	12	11	0	0		out of focus, video very dark
t15	12	12	0	0		out of focus, video very dark
t15	12	13	1	0		out of focus, video very dark
t15	12	14	1	0		out of focus, video very dark
t15	12	15	1	0		out of focus, video very dark
t15	12	16	1	0		out of focus, video very dark
t15	12	17	1	0		out of focus, video very dark
t15	12	18	1	0	ultimately reaches the surface and eating	out of focus, video very dark
t15	13	0	1	0	middle of the tank	out of focus, video very dark
t15	13	1	1	0		out of focus, video very dark
t15	13	2	1	0		out of focus, video very dark
t15	13	3	1	0		out of focus, video very dark
t15	13	4	1	0		out of focus, video very dark
t15	13	5	0	1		out of focus, video very dark
t15	13	6	0	1		out of focus, video very dark
t15	13	7	0	0		out of focus, video very dark
t15	13	8	0	0		out of focus, video very dark
t15	13	9	0	0		out of focus, video very dark
t15	13	10	0	0		out of focus, video very dark
t15	13	11	0	0		out of focus, video very dark
t15	13	12	0	0		out of focus, video very dark
t15	13	13	0	0		out of focus, video very dark
t15	13	14	0	0		out of focus, video very dark
t15	13	15	1	0		out of focus, video very dark
t15	13	16	1	0		out of focus, video very dark
t15	13	17	1	0		out of focus, video very dark
t15	13	18	1	0	ultimately reaches the surface and eating	out of focus, video very dark
t15	14	0	0	1	at surface	out of focus, video very dark
t15	14	1	0	0		out of focus, video very dark
t15	14	2	0	0		out of focus, video very dark
t15	14	3	0	0		out of focus, video very dark
t15	14	4	0	0		out of focus, video very dark
t15	14	5	0	0		out of focus, video very dark
t15	14	6	0	0		out of focus, video very dark
t15	14	7	0	0		out of focus, video very dark
t15	14	8	0	0		out of focus, video very dark
t15	14	9	0	0	got scared and turned around quickly	out of focus, video very dark
t15	14	10	0	0	fish at the bottom of the tank	out of focus, video very dark
t15	14	11	0	0	fish at the bottom of the tank	out of focus, video very dark
t15	14	12	1	0	fish at the bottom of the tank	out of focus, video very dark
t15	14	13	0	0	fish at the bottom of the tank	out of focus, video very dark
t15	14	14	0	0	fish at the bottom of the tank	out of focus, video very dark
t15	14	15	0	0	fish at the bottom of the tank	out of focus, video very dark
t15	14	16	1	0	fish at the bottom of the tank	out of focus, video very dark
t15	14	17	1	0	fish at the bottom of the tank	out of focus, video very dark
t15	14	18	1	0	did not reach surface ultimately	out of focus, video very dark
t15	15	0	0	0	within 5 cm from the surface	out of focus, video very dark
t15	15	1	0	0	within 5 cm from the surface	out of focus, video very dark
t15	15	2	1	0	within 5 cm from the surface	out of focus, video very dark
t15	15	3	1	0		out of focus, video very dark
t15	15	4	0	1		out of focus, video very dark
t15	15	5	0	1		out of focus, video very dark
t15	15	6	0	1		out of focus, video very dark
t15	15	7	0	0		out of focus, video very dark
t15	15	8	0	0		out of focus, video very dark
t15	15	9	0	0		out of focus, video very dark
t15	15	10	0	0		out of focus, video very dark
t15	15	11	0	0		out of focus, video very dark
t15	15	12	1	0		out of focus, video very dark
t15	15	13	1	0		out of focus, video very dark
t15	15	14	1	0		out of focus, video very dark
t15	15	15	1	0		out of focus, video very dark
t15	15	16	0	1	eating	out of focus, video very dark
t15	15	17	0	1	eating	out of focus, video very dark
t15	15	18	0	1	eating	out of focus, video very dark
t15	16	0	0	0		out of focus, video very dark
t15	16	1	0	0		out of focus, video very dark
t15	16	2	0	0		out of focus, video very dark
t15	16	3	0	0		out of focus, video very dark
t15	16	4	0	0		out of focus, video very dark
t15	16	5	0	0		out of focus, video very dark
t15	16	6	0	0		out of focus, video very dark
t15	16	7	0	0		out of focus, video very dark
t15	16	8	0	0		out of focus, video very dark
t15	16	9	0	0		out of focus, video very dark
t15	16	10	0	0		out of focus, video very dark
t15	16	11	0	0		out of focus, video very dark
t15	16	12	0	0		out of focus, video very dark
t15	16	13	1	0		out of focus, video very dark
t15	16	14	1	0		out of focus, video very dark
t15	16	15	1	0		out of focus, video very dark
t15	16	16	0	1	eating	out of focus, video very dark
t15	16	17	0	1	eating	out of focus, video very dark
t15	16	18	0	1	eating	out of focus, video very dark
t15	17	0	0	0		out of focus, video very dark
t15	17	1	0	0		out of focus, video very dark
t15	17	2	0	0		out of focus, video very dark
t15	17	3	0	0		out of focus, video very dark
t15	17	4	0	0		out of focus, video very dark
t15	17	5	0	0		out of focus, video very dark
t15	17	6	0	0		out of focus, video very dark
t15	17	7	0	0		out of focus, video very dark
t15	17	8	0	0		out of focus, video very dark
t15	17	9	0	0		out of focus, video very dark
t15	17	10	0	0		out of focus, video very dark
t15	17	11	0	0		out of focus, video very dark
t15	17	12	0	0		out of focus, video very dark
t15	17	13	0	0		out of focus, video very dark
t15	17	14	1	0		out of focus, video very dark
t15	17	15	1	0		out of focus, video very dark
t15	17	16	1	0		out of focus, video very dark
t15	17	17	1	0		out of focus, video very dark
t15	17	18	1	0	didn't reach surface ultimately	out of focus, video very dark

[truncated: 6 more sheets: Fish_16, Fish_25, Fish_26, Fish_2, Fish_4, Fish_6]
